# Supplementary material for: Health effects associated with smoking: a Burden of Proof study
Source: PubMed Central journal article supplement (PMC9556318; doi:10.1038/s41591-022-01978-x), 2022-10-10
Supplement: 41591_2022_1978_MOESM1_ESM.pdf [file 41591_2022_1978_MOESM1_ESM.pdf]

**Supplementary information**

---

**Health effects associated with smoking: a  
Burden of Proof study**

---

In the format provided by the  
authors and unedited

# Supplementary Information: data sources and supplementary results for “Health effects associated with smoking: a Burden of Proof study”

This appendix provides detailed information on input data sources and supplementary results for “Health effects associated with smoking: a Burden of Proof Study.”

## Table of Contents

|                                                                                                               |     |
|---------------------------------------------------------------------------------------------------------------|-----|
| Section 1: Data source identification and assessment .....                                                    | 2   |
| Section 2: Data inputs .....                                                                                  | 44  |
| Section 3: Study quality & bias assessment .....                                                              | 172 |
| Section 4: The dose-response RR curves and their 95% uncertainty interval for all smoking-outcome pairs ..... | 193 |
| Section 5: Supplementary methods .....                                                                        | 202 |
| Section 6: Sensitivity analysis .....                                                                         | 211 |
| Section 7: Binary smoking-outcome pair (i.e., smoking-fracture) .....                                         | 230 |
| Section 8: Risk curve details .....                                                                           | 232 |
| Section 9: GATHER and PRISMA checklists .....                                                                 | 295 |

## Section 1: Data source identification and assessment

The data in this systematic review includes effect sizes from cohort studies and case-control studies. Age-stratified effect sizes from cross-sectional studies were used to inform age-attenuated curves for cardiovascular outcomes. More detailed information on the data is available at <http://vizhub.healthdata.org/burden-of-proof/>.

### *Section 1.1: Literature studies*

We conducted literature searches to obtain input data on the relationship between current smoking behavior and our 36 target outcomes. We also searched the citation lists of systematic reviews identified during the literature searches to identify primary research articles that may not have been captured with the original search string.

#### **Section 1.1.1: PubMed search**

Literature search updates were performed on PubMed on 6/21/2019, 7/2/2019-7/18/2019 and captured studies published since the previous literature search up to 5/1/2019. Another update was conducted in June 2022, capturing studies from 5/1/2019 through 31/5/2022.

#### **Section 1.1.2: Search strings**

##### *Subarachnoid Hemorrhage*

("Smoking"[Mesh] OR "smoking"[tiab]) AND ("Subarachnoid Hemorrhage"[Mesh] OR "subarachnoid hemorrhage"[tiab] OR "sah"[tiab]) AND ("Risk"[Mesh] OR "relative risk"[tiab] OR "hazard ratio"[tiab] OR "odds ratio"[tiab] OR "rate"[tiab] OR "risk"[tiab]) AND ("Cohort Studies"[Mesh] OR "Prospective Studies"[Mesh] OR "Cohort"[tiab] OR "prospective"[tiab] OR "longitudinal"[tiab] OR "Case-Control Studies"[Mesh] OR "case-control"[tiab] OR "case control"[tiab] OR "case-crossover"[tiab]) AND ("2018/05/01"[PDAT] : "2022/05/31"[PDAT]) NOT (animals[MeSH] NOT humans[MeSH])

##### *Stroke*

("Smoking"[Mesh] OR "smoking"[tiab]) AND ("Stroke"[Mesh] OR "stroke"[tiab] OR "cva"[tiab] OR "cerebrovascular"[tiab] OR "hemorrhage"[tiab] OR "haemorrhage"[tiab] OR "aneurism"[tiab] OR "aneurysm"[tiab]) AND ("Risk"[Mesh] OR "relative risk"[tiab] OR "hazard ratio"[tiab] OR "odds ratio"[tiab] OR "rate"[tiab] OR "risk"[tiab]) AND ("Cohort Studies"[Mesh] OR "Prospective Studies"[Mesh] OR "Cohort"[tiab] OR "prospective"[tiab] OR "longitudinal"[tiab] OR "Case-Control Studies"[Mesh] OR "case-control"[tiab] OR "case control"[tiab] OR "case-crossover"[tiab]) AND ("2018/05/01"[PDAT] : "2022/05/31"[PDAT]) NOT (animals[MeSH] NOT humans[MeSH])

##### *Atrial Fibrillation and Flutter*

("Smoking"[Mesh] OR "smoking"[tiab]) AND ("Atrial Fibrillation"[Mesh] OR "Atrial Flutter"[Mesh] OR "atrial fibrillation"[tiab] OR "atrial flutter"[tiab]) AND ("Risk"[Mesh] OR "relative risk"[tiab] OR "hazard ratio"[tiab] OR "odds ratio"[tiab] OR "rate"[tiab] OR "risk"[tiab]) AND ("Cohort Studies"[Mesh] OR "Prospective Studies"[Mesh] OR "Cohort"[tiab] OR "prospective"[tiab] OR "longitudinal"[tiab] OR "Case-Control Studies"[Mesh] OR "case-control"[tiab] OR "case control"[tiab] OR "case-crossover"[tiab]) AND ("2018/05/01"[PDAT] : "2022/05/31"[PDAT]) NOT (animals[MeSH] NOT humans[MeSH])

##### *Diabetes*

("Smoking"[Mesh] OR "smoking"[tiab]) AND ("Diabetes Mellitus, Type 1"[Mesh] OR "Diabetes Mellitus, Type 2"[Mesh] OR "diabetes"[ti]) AND ("Risk"[Mesh] OR "relative risk"[tiab] OR "hazard ratio"[tiab] OR "odds ratio"[tiab] OR "rate"[tiab] OR "risk"[tiab]) AND ("Cohort Studies"[Mesh] OR "Prospective Studies"[Mesh] OR "Cohort"[tiab] OR "prospective"[tiab] OR "longitudinal"[tiab] OR "Case-Control Studies"[Mesh] OR "case-control"[tiab] OR "case control"[tiab] OR "case-crossover"[tiab]) AND ("2018/05/01"[PDAT] : "2022/05/31"[PDAT]) NOT (animals[MeSH] NOT humans[MeSH])

##### *Lower respiratory infections*

("Smoking"[Mesh] OR "smoking"[tiab]) AND ("respiratory tract infections"[MeSH] OR "lower respiratory"[tiab] OR "pneumonia"[tiab] OR "bronchiolitis"[tiab]) AND ("Risk"[Mesh] OR "relative risk"[tiab] OR "hazard ratio"[tiab] OR "odds ratio"[tiab] OR "rate"[tiab] OR "risk"[tiab]) AND ("Cohort Studies"[Mesh] OR "Prospective Studies"[Mesh] OR "Cohort"[tiab] OR "prospective"[tiab] OR "longitudinal"[tiab] OR "Case-Control Studies"[Mesh] OR "case-control"[tiab] OR "case control"[tiab] OR "case-crossover"[tiab]) AND ("2018/05/01"[PDAT] : "2022/05/31"[PDAT]) NOT (animals[MeSH] NOT humans[MeSH])

#### *Low back pain*

("Smoking"[Mesh] OR "smoking"[tiab]) AND ("Low Back Pain"[Mesh] OR "low back pain"[tiab]) AND ("Risk"[Mesh] OR "relative risk"[tiab] OR "hazard ratio"[tiab] OR "odds ratio"[tiab] OR "rate"[tiab] OR "risk"[tiab]) AND ("Cohort Studies"[Mesh] OR "Prospective Studies"[Mesh] OR "Cohort"[tiab] OR "prospective"[tiab] OR "longitudinal"[tiab] OR "Case-Control Studies"[Mesh] OR "case-control"[tiab] OR "case control"[tiab] OR "case-crossover"[tiab]) AND ("2018/05/01"[PDAT] : "2022/05/31"[PDAT]) NOT (animals[MeSH] NOT humans[MeSH])

#### *Parkinson's disease*

("Smoking"[Mesh] OR "smoking"[tiab]) AND ("Parkinson Disease"[Mesh] OR "parkinson"[tiab]) AND ("Risk"[Mesh] OR "relative risk"[tiab] OR "hazard ratio"[tiab] OR "odds ratio"[tiab] OR "rate"[tiab] OR "risk"[tiab]) AND ("Cohort Studies"[Mesh] OR "Prospective Studies"[Mesh] OR "Cohort"[tiab] OR "prospective"[tiab] OR "longitudinal"[tiab] OR "Case-Control Studies"[Mesh] OR "case-control"[tiab] OR "case control"[tiab] OR "case-crossover"[tiab]) AND ("2018/05/01"[PDAT] : "2022/05/31"[PDAT]) NOT (animals[MeSH] NOT humans[MeSH])

#### *Macular degeneration*

("Smoking"[Mesh] OR "smoking"[tiab]) AND ("Macular Degeneration"[Mesh] OR "macular degeneration"[tiab]) AND ("Risk"[Mesh] OR "relative risk"[tiab] OR "hazard ratio"[tiab] OR "odds ratio"[tiab] OR "rate"[tiab] OR "risk"[tiab]) AND ("Cohort Studies"[Mesh] OR "Prospective Studies"[Mesh] OR "Cohort"[tiab] OR "prospective"[tiab] OR "longitudinal"[tiab] OR "Case-Control Studies"[Mesh] OR "case-control"[tiab] OR "case control"[tiab] OR "case-crossover"[tiab]) AND ("2018/05/01"[PDAT] : "2022/05/31"[PDAT]) NOT (animals[MeSH] NOT humans[MeSH])

#### *Multiple sclerosis*

("Smoking"[Mesh] OR "smoking"[tiab]) AND ("Multiple Sclerosis"[Mesh] OR "multiple sclerosis"[tiab]) AND ("Risk"[Mesh] OR "relative risk"[tiab] OR "hazard ratio"[tiab] OR "odds ratio"[tiab] OR "rate"[tiab] OR "risk"[tiab]) AND ("Cohort Studies"[Mesh] OR "Prospective Studies"[Mesh] OR "Cohort"[tiab] OR "prospective"[tiab] OR "longitudinal"[tiab] OR "Case-Control Studies"[Mesh] OR "case-control"[tiab] OR "case control"[tiab] OR "case-crossover"[tiab]) AND ("2018/05/01"[PDAT] : "2022/05/31"[PDAT]) NOT (animals[MeSH] NOT humans[MeSH])

#### *Rheumatoid arthritis*

("Smoking"[Mesh] OR "smoking"[tiab]) AND ("Arthritis, Rheumatoid"[Mesh] OR "rheumatoid"[tiab] OR "caplan syndrome"[tiab] OR "felty syndrome"[tiab] OR "sjogren"[tiab] OR "still's disease"[tiab]) AND ("Risk"[Mesh] OR "relative risk"[tiab] OR "hazard ratio"[tiab] OR "odds ratio"[tiab] OR "rate"[tiab] OR "risk"[tiab]) AND ("Cohort Studies"[Mesh] OR "Prospective Studies"[Mesh] OR "Cohort"[tiab] OR "prospective"[tiab] OR "longitudinal"[tiab] OR "Case-Control Studies"[Mesh] OR "case-control"[tiab] OR "case control"[tiab] OR "case-crossover"[tiab]) AND ("2018/05/01"[PDAT] : "2022/05/31"[PDAT]) NOT (animals[MeSH] NOT humans[MeSH])

#### *Peptic ulcer disease*

("Smoking"[Mesh] OR "smoking"[tiab]) AND ("Peptic Ulcer"[Mesh] OR "peptic ulcer"[tiab] OR "stomach ulcer"[tiab]) AND ("Risk"[Mesh] OR "relative risk"[tiab] OR "hazard ratio"[tiab] OR "odds ratio"[tiab] OR

"rate"[tiab] OR "risk"[tiab]) AND ("Cohort Studies"[Mesh] OR "Prospective Studies"[Mesh] OR "Cohort"[tiab] OR "prospective"[tiab] OR "longitudinal"[tiab] OR "Case-Control Studies"[Mesh] OR "case-control"[tiab] OR "case control"[tiab] OR "case-crossover"[tiab]) AND ("2018/05/01"[PDAT] : "2022/05/31"[PDAT]) NOT (animals[MeSH] NOT humans[MeSH])

#### *Ischemic heart disease*

("Smoking"[Mesh] OR "smoking"[tiab]) AND ("Myocardial Ischemia"[Mesh] OR "heart disease"[tiab] OR "coronary"[tiab] OR "myocardial infarction"[tiab] OR "heart attack"[tiab] OR "heart disease"[tiab]) AND ("Risk"[Mesh] OR "relative risk"[tiab] OR "hazard ratio"[tiab] OR "odds ratio"[tiab] OR "rate"[tiab] OR "risk"[tiab]) AND ("Cohort Studies"[Mesh] OR "Prospective Studies"[Mesh] OR "Cohort"[tiab] OR "prospective"[tiab] OR "longitudinal"[tiab] OR "Case-Control Studies"[Mesh] OR "case-control"[tiab] OR "case control"[tiab] OR "case-crossover"[tiab]) AND ("2018/05/01"[PDAT] : "2022/05/31"[PDAT]) NOT (animals[MeSH] NOT humans[MeSH])

#### *Tuberculosis*

("Smoking"[Mesh] OR "smoking"[tiab]) AND ("Tuberculosis"[Mesh] OR "tuberculosis"[tiab] OR "TB"[tiab]) AND ("Risk"[Mesh] OR "relative risk"[tiab] OR "hazard ratio"[tiab] OR "odds ratio"[tiab] OR "rate"[tiab] OR "risk"[tiab]) AND ("Cohort Studies"[Mesh] OR "Prospective Studies"[Mesh] OR "Cohort"[tiab] OR "prospective"[tiab] OR "longitudinal"[tiab] OR "Case-Control Studies"[Mesh] OR "case-control"[tiab] OR "case control"[tiab] OR "case-crossover"[tiab]) AND ("2018/05/01"[PDAT] : "2022/05/31"[PDAT]) NOT (animals[MeSH] NOT humans[MeSH])

#### *Gallbladder*

("Smoking"[Mesh] OR "smoking"[tiab]) AND ("Biliary Tract Diseases"[Mesh] OR "gallbladder"[tiab] OR "biliary"[tiab]) AND ("Risk"[Mesh] OR "relative risk"[tiab] OR "hazard ratio"[tiab] OR "odds ratio"[tiab] OR "rate"[tiab] OR "risk"[tiab]) AND ("Cohort Studies"[Mesh] OR "Prospective Studies"[Mesh] OR "Cohort"[tiab] OR "prospective"[tiab] OR "longitudinal"[tiab] OR "Case-Control Studies"[Mesh] OR "case-control"[tiab] OR "case control"[tiab] OR "case-crossover"[tiab]) AND ("2018/05/01"[PDAT] : "2022/05/31"[PDAT]) NOT (animals[MeSH] NOT humans[MeSH])

#### *Fractures*

("Smoking"[Mesh] OR "smoking"[tiab]) AND ("Fractures, Bone"[Mesh] OR "fracture"[tiab]) AND ("Risk"[Mesh] OR "relative risk"[tiab] OR "hazard ratio"[tiab] OR "odds ratio"[tiab] OR "rate"[tiab] OR "risk"[tiab]) AND ("Cohort Studies"[Mesh] OR "Prospective Studies"[Mesh] OR "Cohort"[tiab] OR "prospective"[tiab] OR "longitudinal"[tiab] OR "Case-Control Studies"[Mesh] OR "case-control"[tiab] OR "case control"[tiab] OR "case-crossover"[tiab]) AND ("2018/05/01"[PDAT] : "2022/05/31"[PDAT]) NOT (animals[MeSH] NOT humans[MeSH])

#### *Dementia*

("Smoking"[Mesh] OR "smoking"[tiab]) AND ("Dementia"[Mesh] OR "dementia"[tiab] OR "alzheimer"[tiab] OR "huntington"[tiab] OR "kluver-bucy"[tiab] OR "lewy body"[tiab] OR "creutzfeldt-jakob"[tiab] OR "aphasia"[tiab]) AND ("Risk"[Mesh] OR "relative risk"[tiab] OR "hazard ratio"[tiab] OR "odds ratio"[tiab] OR "rate"[tiab] OR "risk"[tiab]) AND ("Cohort Studies"[Mesh] OR "Prospective Studies"[Mesh] OR "Cohort"[tiab] OR "prospective"[tiab] OR "longitudinal"[tiab] OR "Case-Control Studies"[Mesh] OR "case-control"[tiab] OR "case control"[tiab] OR "case-crossover"[tiab]) AND ("2018/05/01"[PDAT] : "2022/05/31"[PDAT]) NOT (animals[MeSH] NOT humans[MeSH])

#### *Chronic obstructive pulmonary disease*

("Smoking"[Mesh] OR "smoking"[tiab]) AND ("Pulmonary Disease, Chronic Obstructive"[Mesh] OR "COPD"[tiab] OR "emphysema"[tiab] OR "chronic obstructive pulmonary disease"[tiab]) AND ("Risk"[Mesh] OR "relative risk"[tiab] OR "hazard ratio"[tiab] OR "odds ratio"[tiab] OR "rate"[tiab] OR "risk"[tiab]) AND ("Cohort

Studies"[Mesh] OR "Prospective Studies"[Mesh] OR "Cohort"[tiab] OR "prospective"[tiab] OR "longitudinal"[tiab] OR "Case-Control Studies"[Mesh] OR "case-control"[tiab] OR "case control"[tiab] OR "case-crossover"[tiab]) AND ("2018/05/01"[PDAT] : "2022/05/31"[PDAT]) NOT (animals[MeSH] NOT humans[MeSH])

### *Cataracts*

("Smoking"[Mesh] OR "smoking"[tiab]) AND ("Cataract"[Mesh] OR "cataract"[tiab] OR "opacity"[tiab] OR "pseudophakia"[tiab]) AND ("Risk"[Mesh] OR "relative risk"[tiab] OR "hazard ratio"[tiab] OR "odds ratio"[tiab] OR "rate"[tiab] OR "risk"[tiab]) AND ("Cohort Studies"[Mesh] OR "Prospective Studies"[Mesh] OR "Cohort"[tiab] OR "prospective"[tiab] OR "longitudinal"[tiab] OR "Case-Control Studies"[Mesh] OR "case-control"[tiab] OR "case control"[tiab] OR "case-crossover"[tiab]) AND ("2018/05/01"[PDAT] : "2022/05/31"[PDAT]) NOT (animals[MeSH] NOT humans[MeSH])

### *Cancers*

("Smoking"[Mesh] OR "smoking"[tiab]) AND ("Neoplasms"[Mesh] OR "cancer"[tiab] OR "neoplasm"[tiab] OR "carcinoma"[tiab] OR "leukemia"[tiab]) AND ("Risk"[Mesh] OR "relative risk"[tiab] OR "hazard ratio"[tiab] OR "odds ratio"[tiab] OR "rate"[tiab] OR "risk"[tiab]) AND ("Cohort Studies"[Mesh] OR "Prospective Studies"[Mesh] OR "Cohort"[tiab] OR "prospective"[tiab] OR "longitudinal"[tiab] OR "Case-Control Studies"[Mesh] OR "case-control"[tiab] OR "case control"[tiab] OR "case-crossover"[tiab]) AND ("2018/05/01"[PDAT] : "2022/05/31"[PDAT]) NOT (animals[MeSH] NOT humans[MeSH])

### *Asthma*

("Smoking"[Mesh] OR "smoking"[tiab]) AND ("Asthma"[Mesh] OR "asthma"[tiab]) AND ("Risk"[Mesh] OR "relative risk"[tiab] OR "hazard ratio"[tiab] OR "odds ratio"[tiab] OR "rate"[tiab] OR "risk"[tiab]) AND ("Cohort Studies"[Mesh] OR "Prospective Studies"[Mesh] OR "Cohort"[tiab] OR "prospective"[tiab] OR "longitudinal"[tiab] OR "Case-Control Studies"[Mesh] OR "case-control"[tiab] OR "case control"[tiab] OR "case-crossover"[tiab]) AND ("2018/05/01"[PDAT] : "2022/05/31"[PDAT]) NOT (animals[MeSH] NOT humans[MeSH])

### *Aortic aneurysm*

("Smoking"[Mesh] OR "smoking"[tiab]) AND ("Aortic Aneurysm"[MESH] OR "aortic aneurysm"[tiab]) AND ("Risk"[Mesh] OR "relative risk"[tiab] OR "hazard ratio"[tiab] OR "odds ratio"[tiab] OR "rate"[tiab] OR "risk"[tiab]) AND ("Cohort Studies"[Mesh] OR "Prospective Studies"[Mesh] OR "Cohort"[tiab] OR "prospective"[tiab] OR "longitudinal"[tiab] OR "Case-Control Studies"[Mesh] OR "case-control"[tiab] OR "case control"[tiab] OR "case-crossover"[tiab]) AND ("2018/05/01"[PDAT] : "2022/05/31"[PDAT]) NOT (animals[MeSH] NOT humans[MeSH])

## *Section 1.2: Inclusion & Exclusion criteria*

Of those articles captured by each search string, prospective cohort and case-control studies were included if they reported the effect sizes (relative risk, hazard ratio, or odds ratio) of an association between a continuous or categorical dose for smoked tobacco consumption and a GBD outcome with uncertainty. Studies were excluded if they used cross-sectional or retrospective cohort design or if the study was conducted among specific high-risk populations (e.g., people with diabetes or drug users, etc.). For systematic review studies, we extracted data from each underlying study unless data extraction from the underlying studies was not possible, in which case we extracted the pooled estimates from the systematic review.

## *Section 1.3: Outcome definitions*

**Table 1: Definitions of 36 included outcomes**

| Cause Name                                | Definition                                                                                                                                                                                                                                                                     |
|-------------------------------------------|--------------------------------------------------------------------------------------------------------------------------------------------------------------------------------------------------------------------------------------------------------------------------------|
| Alzheimer's disease and related dementias | Dementia is a progressive, degenerative, and chronic neurological disorder typified by cognitive dysfunctions that interfere with daily functioning. We use the Diagnostic and Statistical Manual of Mental Disorders III, IV, or V, or ICD case definitions as the reference. |

|                                    |                                                                                                                                                                                                                                                                                                                                                                                                                                                                                      |
|------------------------------------|--------------------------------------------------------------------------------------------------------------------------------------------------------------------------------------------------------------------------------------------------------------------------------------------------------------------------------------------------------------------------------------------------------------------------------------------------------------------------------------|
| Aortic aneurysm                    | Full-thickness dilation of the aorta, usually due to atherosclerosis, elevated blood pressure, or inflammation of the blood vessel.                                                                                                                                                                                                                                                                                                                                                  |
| Asthma                             | The onset of asthma as measured by a reported doctor's diagnosis and wheezing in the past 12 months                                                                                                                                                                                                                                                                                                                                                                                  |
| Atrial fibrillation and flutter    | Diagnosis based on ECG findings, including:<br>1) irregularly irregular RR intervals (in the absence of complete atrio-ventricular block);<br>2) no distinct P waves on the surface ECG, and;<br>3) an atrial cycle length (when visible) that is usually variable and less than 200 milliseconds.                                                                                                                                                                                   |
| Bladder cancer                     | Malignant neoplasm of the bladder                                                                                                                                                                                                                                                                                                                                                                                                                                                    |
| Breast cancer                      | Malignant neoplasm of the breast                                                                                                                                                                                                                                                                                                                                                                                                                                                     |
| Cataracts                          | Blindness (acuity in the better eye of <math><3/60</math> or <math><10\%</math> visual field around central fixation point) from cataract. Presenting vision is measured using any corrective lenses currently in use.                                                                                                                                                                                                                                                               |
| Cervical cancer                    | Malignant neoplasm of the cervix                                                                                                                                                                                                                                                                                                                                                                                                                                                     |
| Colorectal cancer                  | Malignant neoplasm of the colon and rectum                                                                                                                                                                                                                                                                                                                                                                                                                                           |
| COPD                               | Cases diagnosed based on GOLD criteria, i.e. spirometry results of FEV1/FVC <math><0.7</math> post-bronchodilator.                                                                                                                                                                                                                                                                                                                                                                   |
| Esophageal cancer                  | Malignant neoplasm of the esophagus                                                                                                                                                                                                                                                                                                                                                                                                                                                  |
| Fracture                           | Hip or non-hip bone fractures related to ICD N-codes                                                                                                                                                                                                                                                                                                                                                                                                                                 |
| Gallbladder diseases               | Inflammation of the gallbladder and/or bile duct identified through ultrasound diagnosis                                                                                                                                                                                                                                                                                                                                                                                             |
| Ischemic heart disease             | Acute myocardial infarction (MI): definite and possible MI according to the third universal definition of myocardial infarction; includes recurrent cases and cases who died before reaching medical care                                                                                                                                                                                                                                                                            |
| Kidney cancer                      | Malignant neoplasm of the kidney                                                                                                                                                                                                                                                                                                                                                                                                                                                     |
| Laryngeal cancer                   | Malignant neoplasm of the larynx                                                                                                                                                                                                                                                                                                                                                                                                                                                     |
| Leukemia                           | Malignant neoplasm of the Blood and Bone Marrow (Leukemia)                                                                                                                                                                                                                                                                                                                                                                                                                           |
| Lip and oral cavity cancer         | Malignant neoplasm of the lips and oral cavity                                                                                                                                                                                                                                                                                                                                                                                                                                       |
| Liver cancer                       | Malignant neoplasm of the liver                                                                                                                                                                                                                                                                                                                                                                                                                                                      |
| Low back pain                      | Current low back pain (with or without pain referred into one or both lower limbs) that lasts for at least one day. The "low back" is defined as the area on the posterior aspect of the body from the lower margin of the twelfth ribs to the lower gluteal folds                                                                                                                                                                                                                   |
| Lower respiratory tract infections | Clinician-diagnosed episode of pneumonia or bronchiolitis.                                                                                                                                                                                                                                                                                                                                                                                                                           |
| Lung cancer                        | Malignant neoplasm of the trachea, bronchus, and lungs                                                                                                                                                                                                                                                                                                                                                                                                                               |
| Macular degeneration               | Blindness (presenting visual acuity in the better eye of <math><3/60</math> or <math><10\%</math> visual field around central fixation point) due to macular degeneration, which is a deterioration of the macula, the part of the retina responsible for central vision. Presenting vision is measured with any corrective lenses currently in use.                                                                                                                                 |
| Multiple sclerosis                 | Multiple sclerosis is a chronic, degenerative, and progressive neurological condition typified by the damaging of the myelin sheaths of nerves.                                                                                                                                                                                                                                                                                                                                      |
| Nasopharyngeal cancer              | Malignant neoplasm of the nasopharynx                                                                                                                                                                                                                                                                                                                                                                                                                                                |
| Other pharynx cancer               | Malignant neoplasm of the pharynx                                                                                                                                                                                                                                                                                                                                                                                                                                                    |
| Pancreatic cancer                  | Malignant neoplasm of the pancreas                                                                                                                                                                                                                                                                                                                                                                                                                                                   |
| Parkinson's disease                | New cases according to Gelb criteria (presence of two out of four cardinal symptoms: rest tremor, bradykinesia, rigidity, unilateral onset).                                                                                                                                                                                                                                                                                                                                         |
| Peptic ulcer disease               | Disease characterized by defects in the lining of the stomach or duodenum that extend through the muscularis mucosa into deeper layers and which have caused symptoms or complications (hemorrhage, perforation, obstruction) sufficient to prompt an individual with access to seek care in the last 12 months and leading to diagnosis by a healthcare provider. This can include individuals in an asymptomatic period following one or more symptomatic periods or complications |

|                           |                                                                                                                                                                                                          |
|---------------------------|----------------------------------------------------------------------------------------------------------------------------------------------------------------------------------------------------------|
| Peripheral artery disease | Peripheral arterial disease diagnosed by an Ankle-Brachial Index <0.9.                                                                                                                                   |
| Prostate cancer           | Malignant neoplasm of the prostate                                                                                                                                                                       |
| Rheumatoid arthritis      | Four of the 1987 criteria by the American College of Rheumatology (ACR 1987), which stipulate seven diagnostic criteria, need to be satisfied for a diagnosis.                                           |
| Stomach cancer            | Malignant neoplasm of the stomach                                                                                                                                                                        |
| Stroke                    | Stroke was defined according to WHO criteria of rapidly developing clinical signs of usually focal disturbance of cerebral function lasting more than 24 h or leading to death.                          |
| Tuberculosis              | All-forms of Tuberculosis including pulmonary TB that is bacteriologically confirmed (smear and/or culture confirmed) and extrapulmonary TB that is bacteriologically confirmed or clinically diagnosed. |
| Diabetes                  | Fasting plasma glucose greater or equal to 126 mg/dl (7 mmol/l) or current treatment (insulin or drugs).                                                                                                 |

#### Section 1.4: Data extraction

Table 2: Data extraction template

| Extracted variable (column name) | Extraction guidance provided                                                                                                                                                                                                                                                                                       |
|----------------------------------|--------------------------------------------------------------------------------------------------------------------------------------------------------------------------------------------------------------------------------------------------------------------------------------------------------------------|
| extractor                        | id of person who extracted the data                                                                                                                                                                                                                                                                                |
| seq                              |                                                                                                                                                                                                                                                                                                                    |
| underlying_nid                   | Underlying NID: Enter the underlying NID of the study (if applicable). Always talk to a data indexer if you don't know if an underlying NID is needed. They may be used for meta-analyses, certain database sources, and in some other specific cases.                                                             |
| nid                              | Found in GHDx, created through the epi form, or created by Data Indexer                                                                                                                                                                                                                                            |
| field_citation_value             | IHME Zotero format or if source has NID, citation info from GHDx                                                                                                                                                                                                                                                   |
| file_path                        | optional; full file path of article; Only needed if source doesn't have NID, to facilitate NID creation.                                                                                                                                                                                                           |
| risk                             | Risk: Select the risk factor, if not listed here, contact the causal criteria team                                                                                                                                                                                                                                 |
| risk_mapping                     | the relationship between study definition of risk and GBD definition of risk for a particular effect size                                                                                                                                                                                                          |
| outcome                          | Outcome: Select the outcome.                                                                                                                                                                                                                                                                                       |
| outcome_mapping                  | the relationship between study definition of outcome and GBD definition of outcome for a particular effect size                                                                                                                                                                                                    |
| location_name                    | location name (from locations tab). Do a fast double-click in this field to get the drop-down menu, then start typing the location_name. For location_names with special characters, you may need to use the scroll bar.                                                                                           |
| location_id                      | autopopulated from location_name                                                                                                                                                                                                                                                                                   |
| rep_geography                    | Were the study participants representative of the geography? 1=yes, 0=no                                                                                                                                                                                                                                           |
| rep_selection_criteria           | If rep_geography is 0, please specify the selection criteria of the study that is used in the analysis                                                                                                                                                                                                             |
| rep_prevalent_disease            | Is the study aiming to evaluate the risk or mortality of people who have already developed the outcome? 1=yes 0=no (i.e. yes if for SBP-IHD paper, all participants have IHD at baseline and the paper is looking at mortality due to SBP, no if for SBP-IHD paper the participants have other prevalent diseases) |
| year_start_study                 | year the study was started. If not specified, leave blank                                                                                                                                                                                                                                                          |
| year_end_study                   | year the study was finished (including most recent follow up). If not specified, leave blank                                                                                                                                                                                                                       |
| age_start                        | ages from 1 and above must be entered as an integer. Ages <1 can be entered as decimal values, e.g., 3 days = 3/365.                                                                                                                                                                                               |



|                         |                                                                                                                                                                                                                                                                                                                                                                                                                                                                                                                                                                       |
|-------------------------|-----------------------------------------------------------------------------------------------------------------------------------------------------------------------------------------------------------------------------------------------------------------------------------------------------------------------------------------------------------------------------------------------------------------------------------------------------------------------------------------------------------------------------------------------------------------------|
| age_end                 | ages from 1 and above must be entered as an integer. Ages <1 can be entered as decimal values, e.g., 3 days = 3/365.                                                                                                                                                                                                                                                                                                                                                                                                                                                  |
| age_mean                | Mean age                                                                                                                                                                                                                                                                                                                                                                                                                                                                                                                                                              |
| age_sd                  | SD of age                                                                                                                                                                                                                                                                                                                                                                                                                                                                                                                                                             |
| age_issue               | 0 = no issue flagged; 1 = issue flagged for modeler; always include explanatory notes the note_SR column                                                                                                                                                                                                                                                                                                                                                                                                                                                              |
| percent_male            | what percent of the population is male (0-1), if pop is all female then it would be 0                                                                                                                                                                                                                                                                                                                                                                                                                                                                                 |
| sex_issue               | sex_issue                                                                                                                                                                                                                                                                                                                                                                                                                                                                                                                                                             |
| design                  | Study design: Specify the design of the study                                                                                                                                                                                                                                                                                                                                                                                                                                                                                                                         |
| study_name              | Study Name: Enter the name of the study (e.g., Nurses' Health Study), if provided. Do not enter the title of the article.                                                                                                                                                                                                                                                                                                                                                                                                                                             |
| exp_assess_level        | Level of exposure assessment: The exposure was assessed...                                                                                                                                                                                                                                                                                                                                                                                                                                                                                                            |
| exp_instrument          | Exposure assessment instrument: Specify the name of the exposure assessment instrument. For self-reported exposures, please specify the name of the questionnaire e.g., International Physical Activity Questionnaire (IPAQ). If more than one instrument specify all                                                                                                                                                                                                                                                                                                 |
| exp_assess_period       | What was the frequency of exposure assessment?                                                                                                                                                                                                                                                                                                                                                                                                                                                                                                                        |
| exp_assess_num          | if multiple, specify the number of times that exposure was assessed (excluding baseline)                                                                                                                                                                                                                                                                                                                                                                                                                                                                              |
| exp_method_1            | Please specify the method of exposure assessment. If there are more than 1, please add in the next columns labeled ""exp_method_2"".                                                                                                                                                                                                                                                                                                                                                                                                                                  |
| exp_method_2            | Please specify the method of exposure assessment. If there are more than 2, please add in the next columns labeled ""exp_method_3"".                                                                                                                                                                                                                                                                                                                                                                                                                                  |
| exp_method_3            | Please specify the method of exposure assessment.                                                                                                                                                                                                                                                                                                                                                                                                                                                                                                                     |
| exp_recall_period       | This field describes the unit of exposure recall used in data collection ONLY for self-report. Select the correct option from the drop-down menu. If the unit is days, weeks, months, or years, please enter the number in exp_recall_period_value (next column). If the unit is 'lifetime', nothing needs to be entered in exp_recall_period_value. For example, if the study said the recall period was 4 weeks, enter 4 in exp_recall_period_value, and 'weeks' in the field exp_recall_period. If 'other' is selected, please describe in exp_recall_period_other |
| exp_recall_period_value | If you entered days, weeks, months, or years in the field 'exp_recall_period', please enter the corresponding integer in this field. For example, if the study said the recall period was 4 weeks, enter 4 in exp_recall_period_value, and 'weeks' in the field exp_recall_period.                                                                                                                                                                                                                                                                                    |
| exp_recall_period_other | If 'other' was selected in exp_recall_period, please describe the exposure recall period that the study specified (e.g., recall of exposure from 12 to 18 years).                                                                                                                                                                                                                                                                                                                                                                                                     |
| exp_type                | Which form of the exposure was included in relative risk estimation analysis?                                                                                                                                                                                                                                                                                                                                                                                                                                                                                         |
| outcome_def             | Outcome definition: Provide a brief description of the outcome as reported in the study.                                                                                                                                                                                                                                                                                                                                                                                                                                                                              |
| outcome_type            | Outcome type: please specify if the outcome definition included incidence of or mortality from a disease endpoint                                                                                                                                                                                                                                                                                                                                                                                                                                                     |
| outcome_assess_1        | Method of outcome assessment: Specify the method of assessment of the study outcome. If more than 1 are appropriate, enter additional methods in the next column labeled ""outcome_assess_2""                                                                                                                                                                                                                                                                                                                                                                         |
| outcome_assess_2        | Method of outcome assessment: Specify the method of assessment of the study outcome. If more than 2 are appropriate, enter additional methods in the next column labeled ""outcome_assess_3""                                                                                                                                                                                                                                                                                                                                                                         |
| outcome_assess_3        | Method of outcome assessment: Specify the method of assessment of the study outcome.                                                                                                                                                                                                                                                                                                                                                                                                                                                                                  |

|                                  |                                                                                                                                                                                                                                                                  |
|----------------------------------|------------------------------------------------------------------------------------------------------------------------------------------------------------------------------------------------------------------------------------------------------------------|
| duration_fup_measure             | Type of follow up measure (i.e. mean, median, max, min)                                                                                                                                                                                                          |
| duration_fup_units               | Units of follow up duration                                                                                                                                                                                                                                      |
| value_of_duration_fup            | Enter the length of participant follow-up.                                                                                                                                                                                                                       |
| confounders_age                  | if controlled for in the relative risk estimation analysis, mark 1 for yes.<br>Mark 0 for no                                                                                                                                                                     |
| confounders_sex                  | if controlled for in the relative risk estimation analysis, mark 1 for yes.<br>Mark 0 for no                                                                                                                                                                     |
| confounders_education            | if controlled for in the relative risk estimation analysis, mark 1 for yes.<br>Mark 0 for no                                                                                                                                                                     |
| confounders_income               | if controlled for in the relative risk estimation analysis, mark 1 for yes.<br>Mark 0 for no                                                                                                                                                                     |
| confounders_smoking              | if controlled for in the relative risk estimation analysis, mark 1 for yes.<br>Mark 0 for no                                                                                                                                                                     |
| confounders_alcohol_use          | if controlled for in the relative risk estimation analysis, mark 1 for yes.<br>Mark 0 for no                                                                                                                                                                     |
| confounders_physical_activity    | if controlled for in the relative risk estimation analysis, mark 1 for yes.<br>Mark 0 for no                                                                                                                                                                     |
| confounders_dietary_components   | if controlled for in the relative risk estimation analysis, mark 1 for yes.<br>Mark 0 for no                                                                                                                                                                     |
| confounders_bmi                  | if controlled for in the relative risk estimation analysis, mark 1 for yes.<br>Mark 0 for no                                                                                                                                                                     |
| confounders_hypertension         | if controlled for in the relative risk estimation analysis, mark 1 for yes.<br>Mark 0 for no                                                                                                                                                                     |
| confounders_diabetes             | if controlled for in the relative risk estimation analysis, mark 1 for yes.<br>Mark 0 for no                                                                                                                                                                     |
| confounders_hypercholesterolemia | if controlled for in the relative risk estimation analysis, mark 1 for yes.<br>Mark 0 for no                                                                                                                                                                     |
| confounders_other                | For other confounders that not listed, list here                                                                                                                                                                                                                 |
| page_num_effect_size             | Page number (where you found effect_size) from literature, or survey question where you found effect size; Use page number(s) of article, not page # of pdf                                                                                                      |
| custom_exp_level_lower_sign      | can use a <, >, = etc in association with custom_exp_level_lower                                                                                                                                                                                                 |
| custom_exp_level_lower           | if don't have a mean/midpoint exposure level can use this column in conjecture with the custom_exp_level_upper to enter in a range                                                                                                                               |
| custom_exp_level_upper_sign      | can use a <, >, = etc in association with custom_exp_level_upper                                                                                                                                                                                                 |
| custom_exp_level_upper           | if don't have a mean/midpoint exposure level can use this column in conjecture with the custom_exp_level_lower to enter in a range                                                                                                                               |
| custom_unexp_level_lower_sign    | can use a <, >, = etc in association with custom_unexp_level_lower                                                                                                                                                                                               |
| custom_unexp_level_lower         | if don't have a mean/midpoint exposure level can use this column in conjecture with the custom_unexp_level_upper to enter in a range                                                                                                                             |
| custom_unexp_level_upper_sign    | can use a <, >, = etc in association with custom_unexp_level_upper                                                                                                                                                                                               |
| custom_unexp_level_upper         | if don't have a mean/midpoint exposure level can use this column in conjecture with the custom_unexp_level_lower to enter in a range                                                                                                                             |
| effect_size_measure              | Effect size measure: Specify the measure of effect size                                                                                                                                                                                                          |
| effect_size                      | Effect size estimate: Provide the effect size estimate                                                                                                                                                                                                           |
| lower                            | Provide the lower limit of the confidence interval. Enter on a ""per 1"" basis. (If the CI is reported as a percent, you must convert to a decimal.)<br>These 3 fields must all be filled in if any of them are filled in: lower, upper, uncertainty_type_value. |
| upper                            | Provide the upper limit of the confidence interval. Enter on a ""per 1"" basis. (If the CI is reported as a percent, you must convert to a decimal.)<br>These 3 fields must all be filled in if any of them are filled in: lower, upper, uncertainty_type_value. |

|                                    |                                                                                                                                                                                                                                                      |
|------------------------------------|------------------------------------------------------------------------------------------------------------------------------------------------------------------------------------------------------------------------------------------------------|
| CI_uncertainty_type_value          | This field is required if 'lower' & 'upper' are entered. This column represents the confidence level which is reported at (Eg. 95, 90, 99). These 3 fields must all be filled in if any of them are filled in: lower, upper, uncertainty_type_value. |
| nonCI_uncertainty_value            | Numerical value of the nonCI_uncertainty_type entered in that column. For example, if SD=5.3, you'd put 5.3 in this column, and choose SD from the drop down menu in nonCI_uncertainty_type.                                                         |
| nonCI_uncertainty_type             | Enter SE or SD if appropriate. For example, if SD=5.3, you'd put 5.3 in nonCI_uncertainty_value, and choose SD from the drop down menu in this column (nonCI_uncertainty_type).                                                                      |
| uncertainty_issue                  | Mark with a 1 if no uncertainty is reported, if some sort of uncertainty is reported, mark 0                                                                                                                                                         |
| custom_webplot_digitizer           | 1 if webplot digitizer was used to pull the effect size                                                                                                                                                                                              |
| subgroup_analysis                  | 1 if RR is from main analysis (all participants), 0 if sub-analysis (only males, or among a specific age group, etc.)                                                                                                                                |
| subgroup_analysis_free_text        | if a sub-analysis, describe it (i.e. age, sex, etc.)                                                                                                                                                                                                 |
| effect_size_multi_location         | 1 if the reported effect size is from a multi-country study and only one effect size has been reported for all locations, otherwise 0                                                                                                                |
| effect_size_multi_location_specify | which geography level is the RR for                                                                                                                                                                                                                  |
| pooled_cohort                      | 1 if the reported effect size is from a pooled analysis and only pooled effect size has been reported, otherwise 0                                                                                                                                   |
| dose_response                      | Does the study support a dose-response relationship between the exposure and the outcome? (1= yes, 0=no)                                                                                                                                             |
| dose_response_detail               | If ""1"" was specified in the dose_response field, please specify in this field the type of evidence supporting the dose-response relationship. For example, ""statistically significant p value for linear trend"".                                 |
| cohort_person_years_exp            | Please specify the person years of follow up in the exposed group                                                                                                                                                                                    |
| cohort_person_years_unexp          | Please specify the person years of follow up in the unexposed group                                                                                                                                                                                  |
| cohort_person_years_total          | Enter the total person-years of follow-up if person-years of follow up in exposed and unexposed not reported                                                                                                                                         |
| cohort_number_events_exp           | Please specify the number of events in the exposed group                                                                                                                                                                                             |
| cohort_number_events_unexp         | Please specify the number of events in the unexposed group                                                                                                                                                                                           |
| cohort_number_events_total         | Enter the total number of events/cases if number of events in exposed and unexposed not reported                                                                                                                                                     |
| cohort_sample_size_exp             | Please specify the number of people in the exposed group if person-years of follow up in exposed not reported                                                                                                                                        |
| cohort_sample_size_unexp           | Please specify the number of people in the unexposed group if person-years of follow up in unexposed not reported                                                                                                                                    |
| cohort_sample_size_total           | Please specify the number of people included in the analysis if total person-years of follow up in not reported                                                                                                                                      |
| cohort_dropout_rate                | Dropout rate?: Specify the dropout rate (%) at the end of the study. Enter on a ""per 1"" basis. For example: 23% is entered as .23.                                                                                                                 |
| cohort_dropout_assess              | Specify how dropout rate was defined in the study.                                                                                                                                                                                                   |
| cohort_exposed_def                 | exposed group definition: Provide a brief description of the exposed group (i.e., the comparison group) as used in estimation of the relative risk (e.g., never smokers)                                                                             |
| cohort_exp_unit_rr                 | Exposure unit (for continuous risks): Specify the unit of exposure (e.g., grams/day).                                                                                                                                                                |
| cohort_exp_level_rr                | Exposure level in the exposed group (for continuous risks): Specify the mean/median level of exposure in the exposed group.                                                                                                                          |
| cohort_unexp_def                   | unexposed group definition: Provide a brief description of the unexposed group (i.e., the comparison group) as used in estimation of the relative risk (e.g., never smokers)                                                                         |

|                                   |                                                                                                                                                                              |
|-----------------------------------|------------------------------------------------------------------------------------------------------------------------------------------------------------------------------|
| cohort_unexp_unit_rr              | Exposure unit (for continuous risks): Specify the unit of exposure (e.g., grams/day) for the unexposed group                                                                 |
| cohort_unexp_level_rr             | Exposure level in the unexposed group (for continuous risks): Specify the mean/median level of exposure in the unexposed group.                                              |
| cohort_exp_level_dr               | Exposure level in for dose-repose RRs (for continuous risks): If the study reports dose-repose RR, please specify the level of exposure for the reported RR                  |
| cc_community                      | Were the controls selected from the community? 1 = yes, 0=no                                                                                                                 |
| cc_cases                          | Number of cases                                                                                                                                                              |
| cc_control                        | Number of controls                                                                                                                                                           |
| cc_exposed_def                    | Exposed group definition: Provide a brief description of the exposed group for which the the relative risk is reported (e.g., current smokers)                               |
| cc_exp_unit_rr                    | Exposure unit (for continuous risks): Specify the unit of exposure (e.g., grams/day).                                                                                        |
| cc_exp_level_rr                   | Exposure level in the exposed group (for continuous risks): Specify the mean/median level of exposure in the exposed group.                                                  |
| cc_unexposed_def                  | Unexposed group definition: Provide a brief description of the unexposed group (i.e., the comparison group) as used in estimation of the relative risk (e.g., never smokers) |
| cc_unexp_unit_rr                  |                                                                                                                                                                              |
| cc_unexp_level_rr                 | Exposure level in the unexposed group (for continuous risks): Specify the mean/median level of exposure in the unexposed group.                                              |
| cc_exp_level_dr                   | Exposure level in for dose-repose RRs (for continuous risks): If the study reports dose-repose RR, please specify the level of exposure for the reported RR                  |
| int_intervention_description      | Intervention definition: Provide a brief description of the intervention as reported in the study.                                                                           |
| int_control_description           | control definition: Provide a brief description of the control as reported in the study.                                                                                     |
| int_intervention_multi_rf         | Does this intervention simultaneously target more than one risk? (1=yes, 0=no)                                                                                               |
| int_intervention_multi_rf_specify | Specify the risks that are targeted by the interevntion                                                                                                                      |
| int_intervention_level            | Level of intervention: The intervention was implemented ...                                                                                                                  |
| int_adhere_assess                 | Specify how adherence was defined in the study.                                                                                                                              |
| int_adhere_rate_intervention      | adherence rate in the intervention group; Enter on a ""per 1"" basis. For example: 23% is entered as .23.                                                                    |
| int_adhere_rate_control           | adherence rate in the control group; Enter on a ""per 1"" basis. For example: 23% is entered as .23.                                                                         |
| int_dropout_rate_intervention     | Dropout rate? in the intervention group: Specify the dropout rate (%) at the end of the study. Enter on a ""per 1"" basis. For example: 23% is entered as .23.               |
| int_dropout_rate_control          | Dropout rate? in the control group: Specify the dropout rate (%) at the end of the study. Enter on a ""per 1"" basis. For example: 23% is entered as .23.                    |
| int_dropout_assess                | Specify how dropout rate was defined in the study.                                                                                                                           |
| int_blinding                      | For interventional studies. Blinding: The trial was ... (select 1)                                                                                                           |
| int_exp_unit                      | For trials, specify the unit of exposure (e.g., mmol/l)                                                                                                                      |
| int_baseline_exp_int              | For trials, specify the exposure level in the intervention group at baseline                                                                                                 |
| int_baseline_exp_comp             | For trials, specify the exposure level in the comparison group at baseline                                                                                                   |
| int_fup_exp_int                   | For trials, specify the exposure level in the intervention group at the end of the follow-up time                                                                            |
| int_fup_exp_comp                  | For trials, specify the exposure level in the comparison group at the end of follow up time                                                                                  |

|                                            |                                                                                                                                       |
|--------------------------------------------|---------------------------------------------------------------------------------------------------------------------------------------|
| int_fup_exp_int_difference                 | For trials, please specify the difference of exposure level between baseline and follow up time for the intervention group            |
| int_fup_exp_comp_difference                | For trials, please specify the difference of exposure level between baseline and follow up time for the comparison group              |
| int_person_years_int                       | Please specify the number of person years of follow up for the intervention group                                                     |
| int_person_years_comp                      | Please specify the number of person years of follow up in the comparison group                                                        |
| int_number_events_int                      | For trials, specify the number of cases in the intervention group at the end of follow up                                             |
| int_number_events_comp                     | For trials, specify the number of cases in the control group at the end of follow up                                                  |
| int_sample_size_int_group_baseline         | For trials, specify the sample size in the intervention group at baseline                                                             |
| int_sample_size_comparison_group_baseline  | For trials, specify the sample size in the comparison group at baseline                                                               |
| int_sample_size_int_group_follow_up        | For trials, specify the sample size in the intervention group at the end of the follow-up time                                        |
| int_sample_size_comparison_group_follow_up | For trials, specify the sample size in the comparison group at the end of follow up time                                              |
| note_modeler                               | for modelers only, audience is modeler, not for correspondence                                                                        |
| note_sr                                    | notes related to extraction, including assumptions, data adjustment, problems with source, any other notes that may be relevant, etc. |

*Section 1.5: PRISMA diagrams*

See next page.

PRISMA 2020 flow diagram for a new systematic review of the Smoking and Cardiovascular disease risk-outcome pair for age-specific relative risks

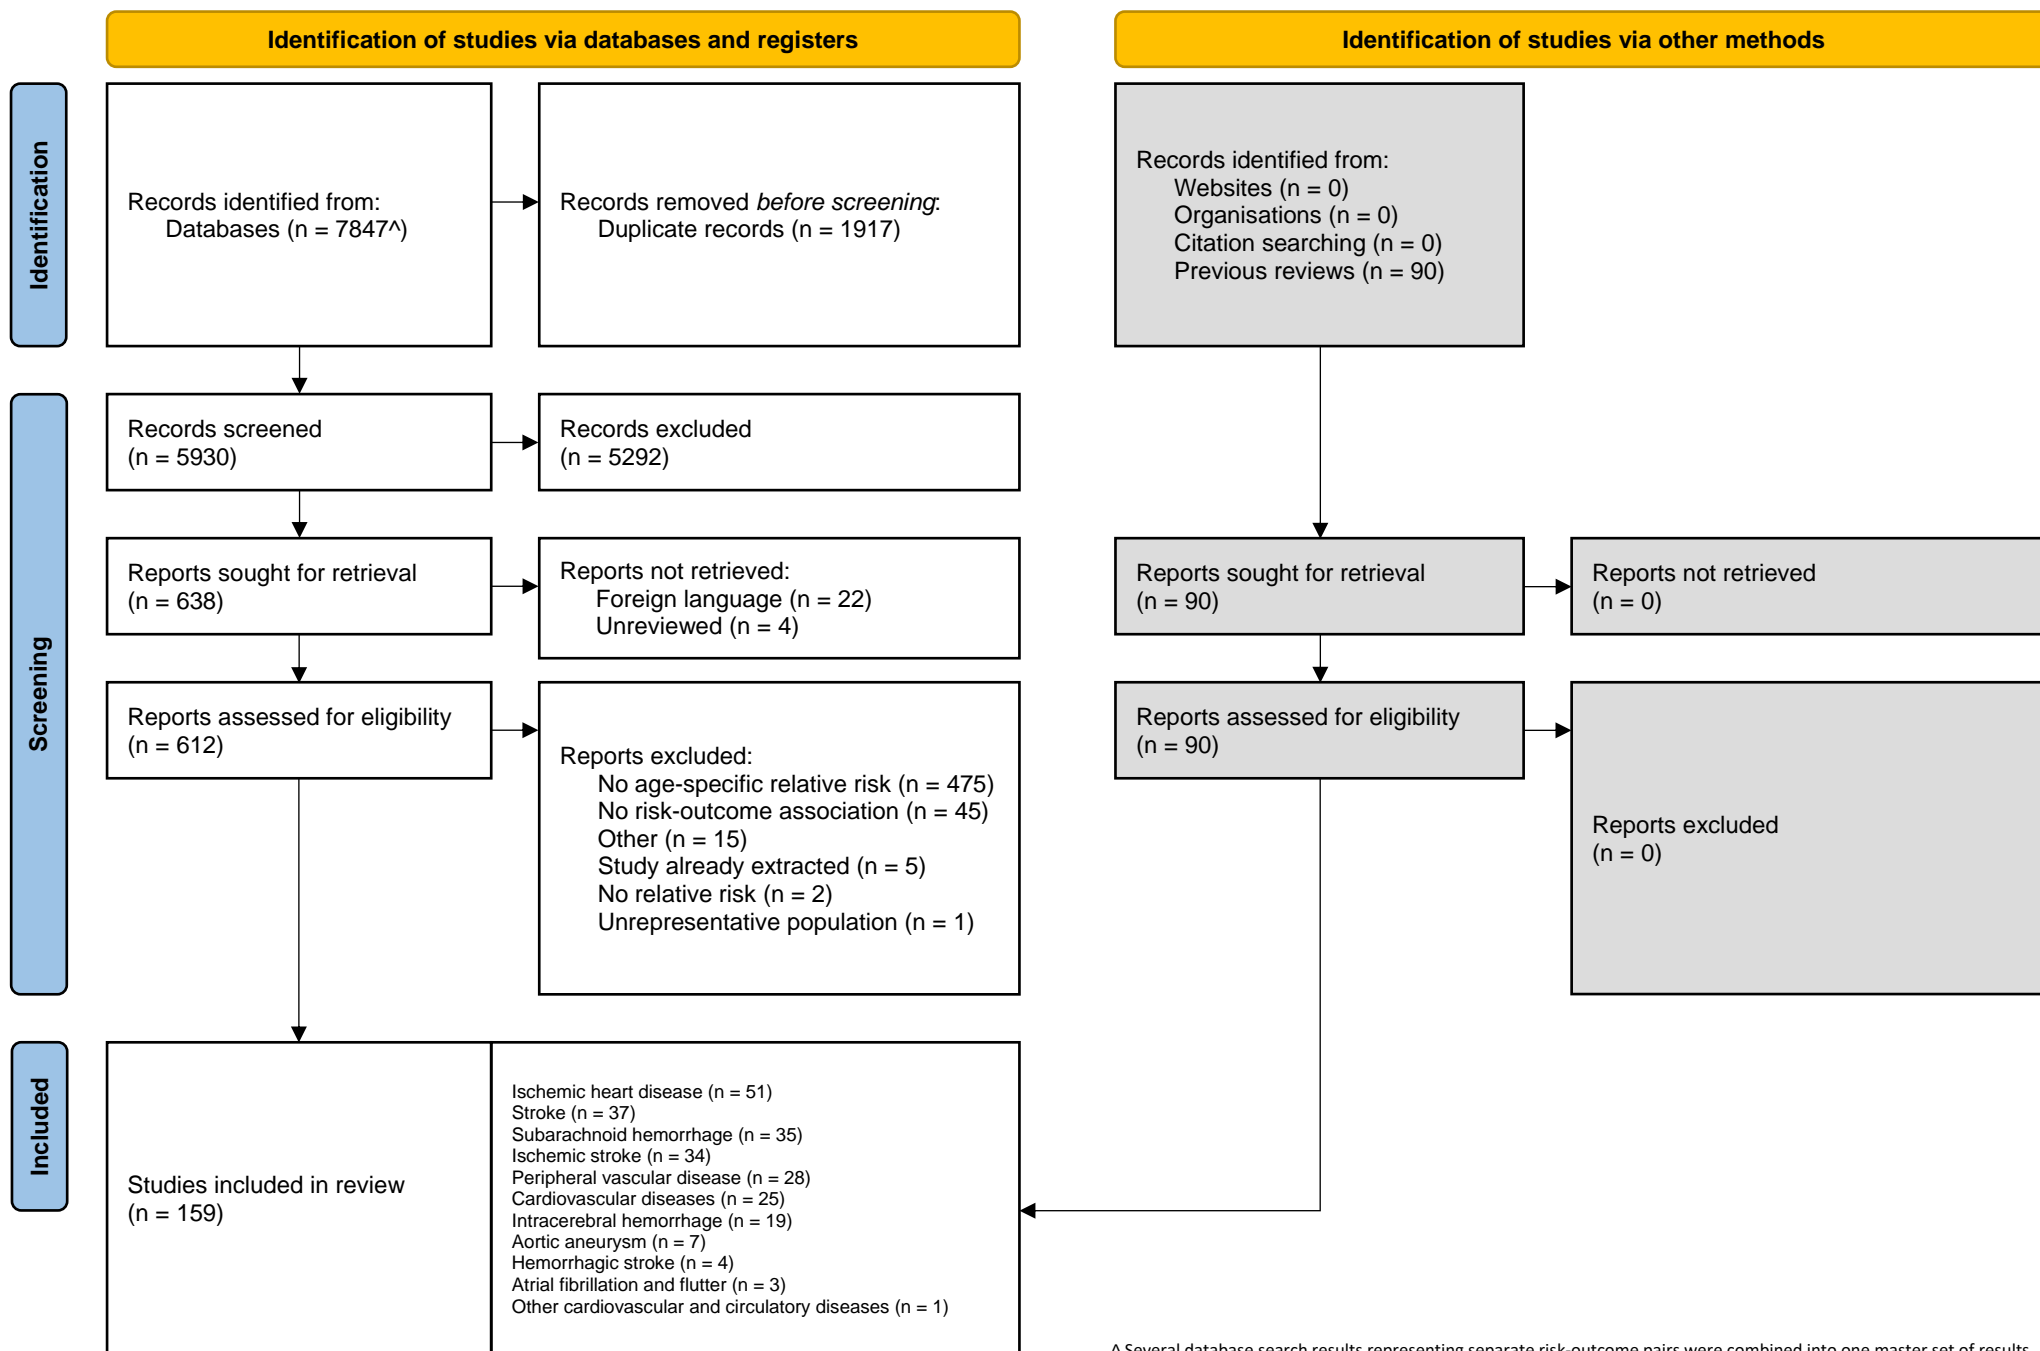

PRISMA 2020 flow diagram for an updated systematic review of the Smoking and Atrial fibrillation and flutter risk-outcome pair

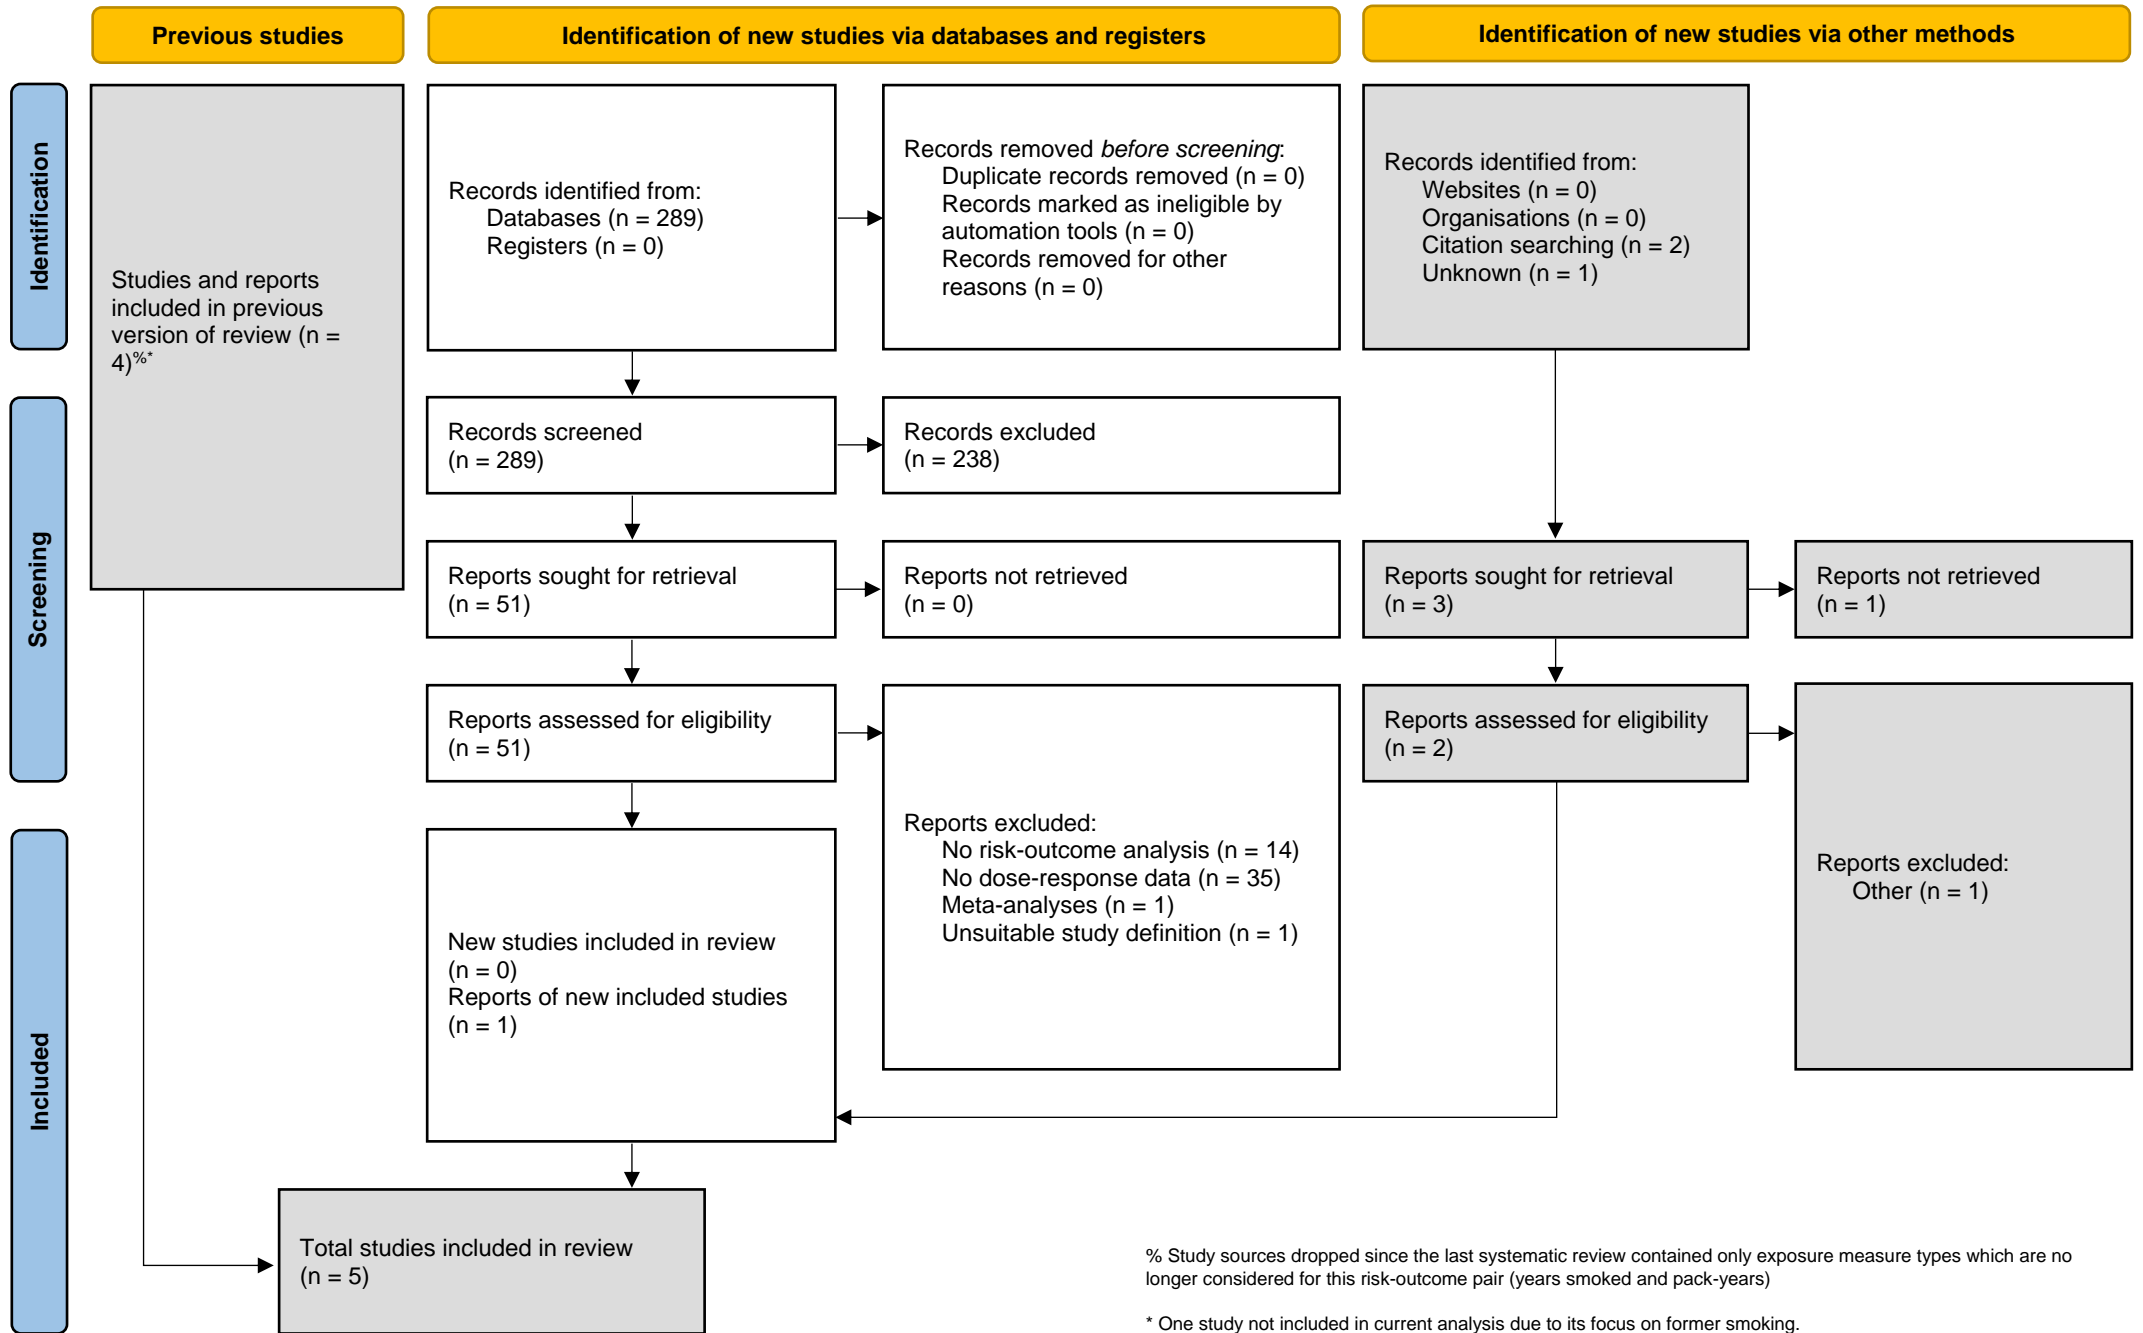





PRISMA 2020 flow diagram for an updated systematic review of the Smoking and Ischemic heart disease risk-outcome pair

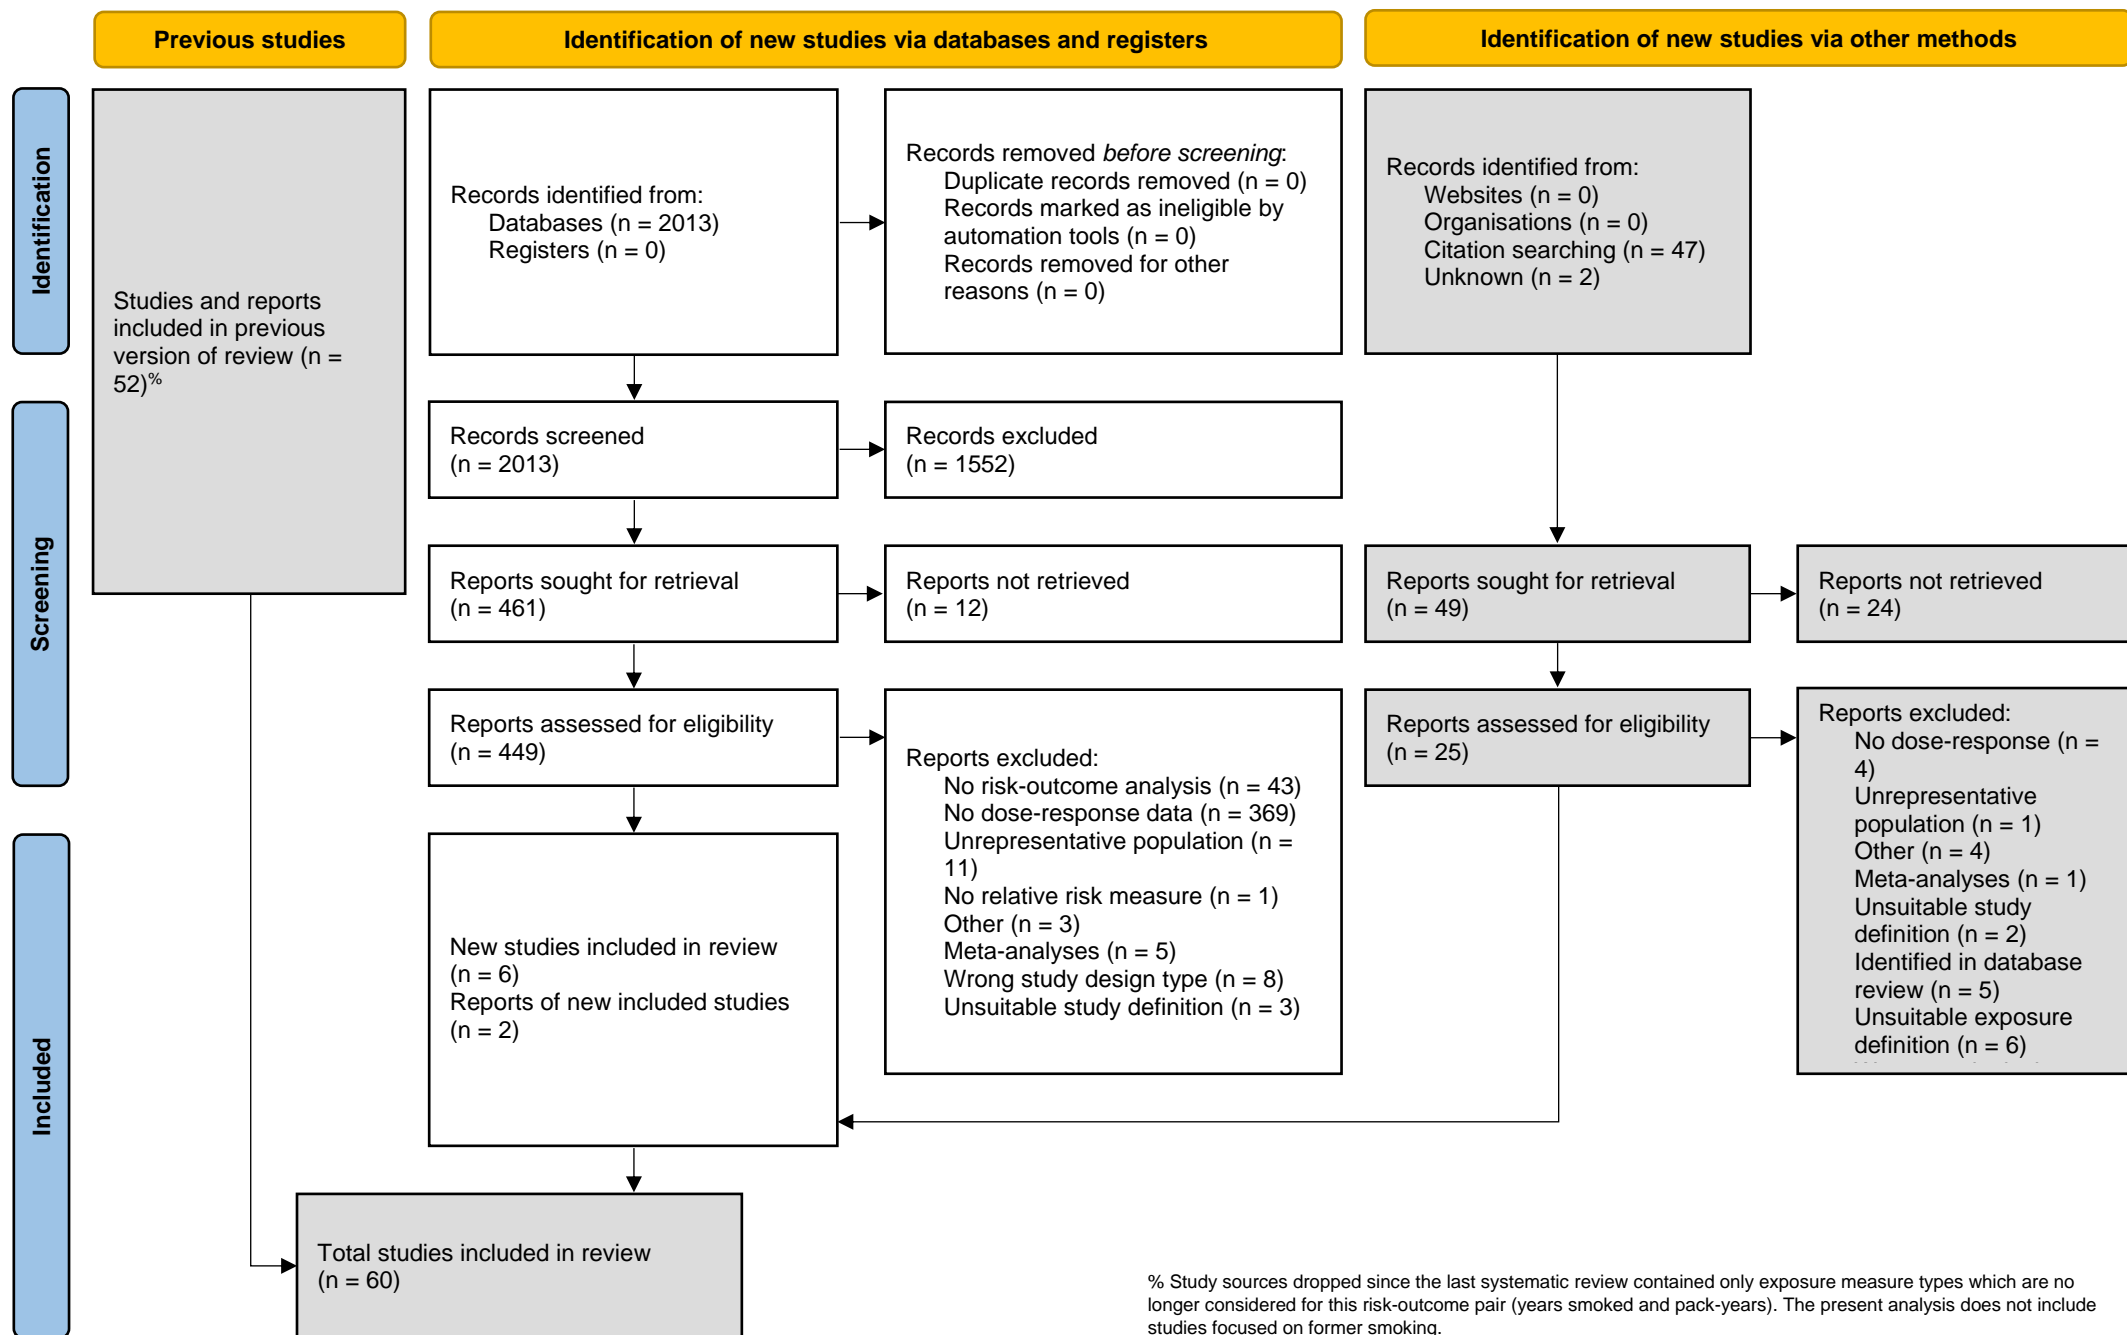

PRISMA 2020 flow diagram for an updated systematic review of the Smoking and Lower extremity peripheral arterial disease risk-outcome pair

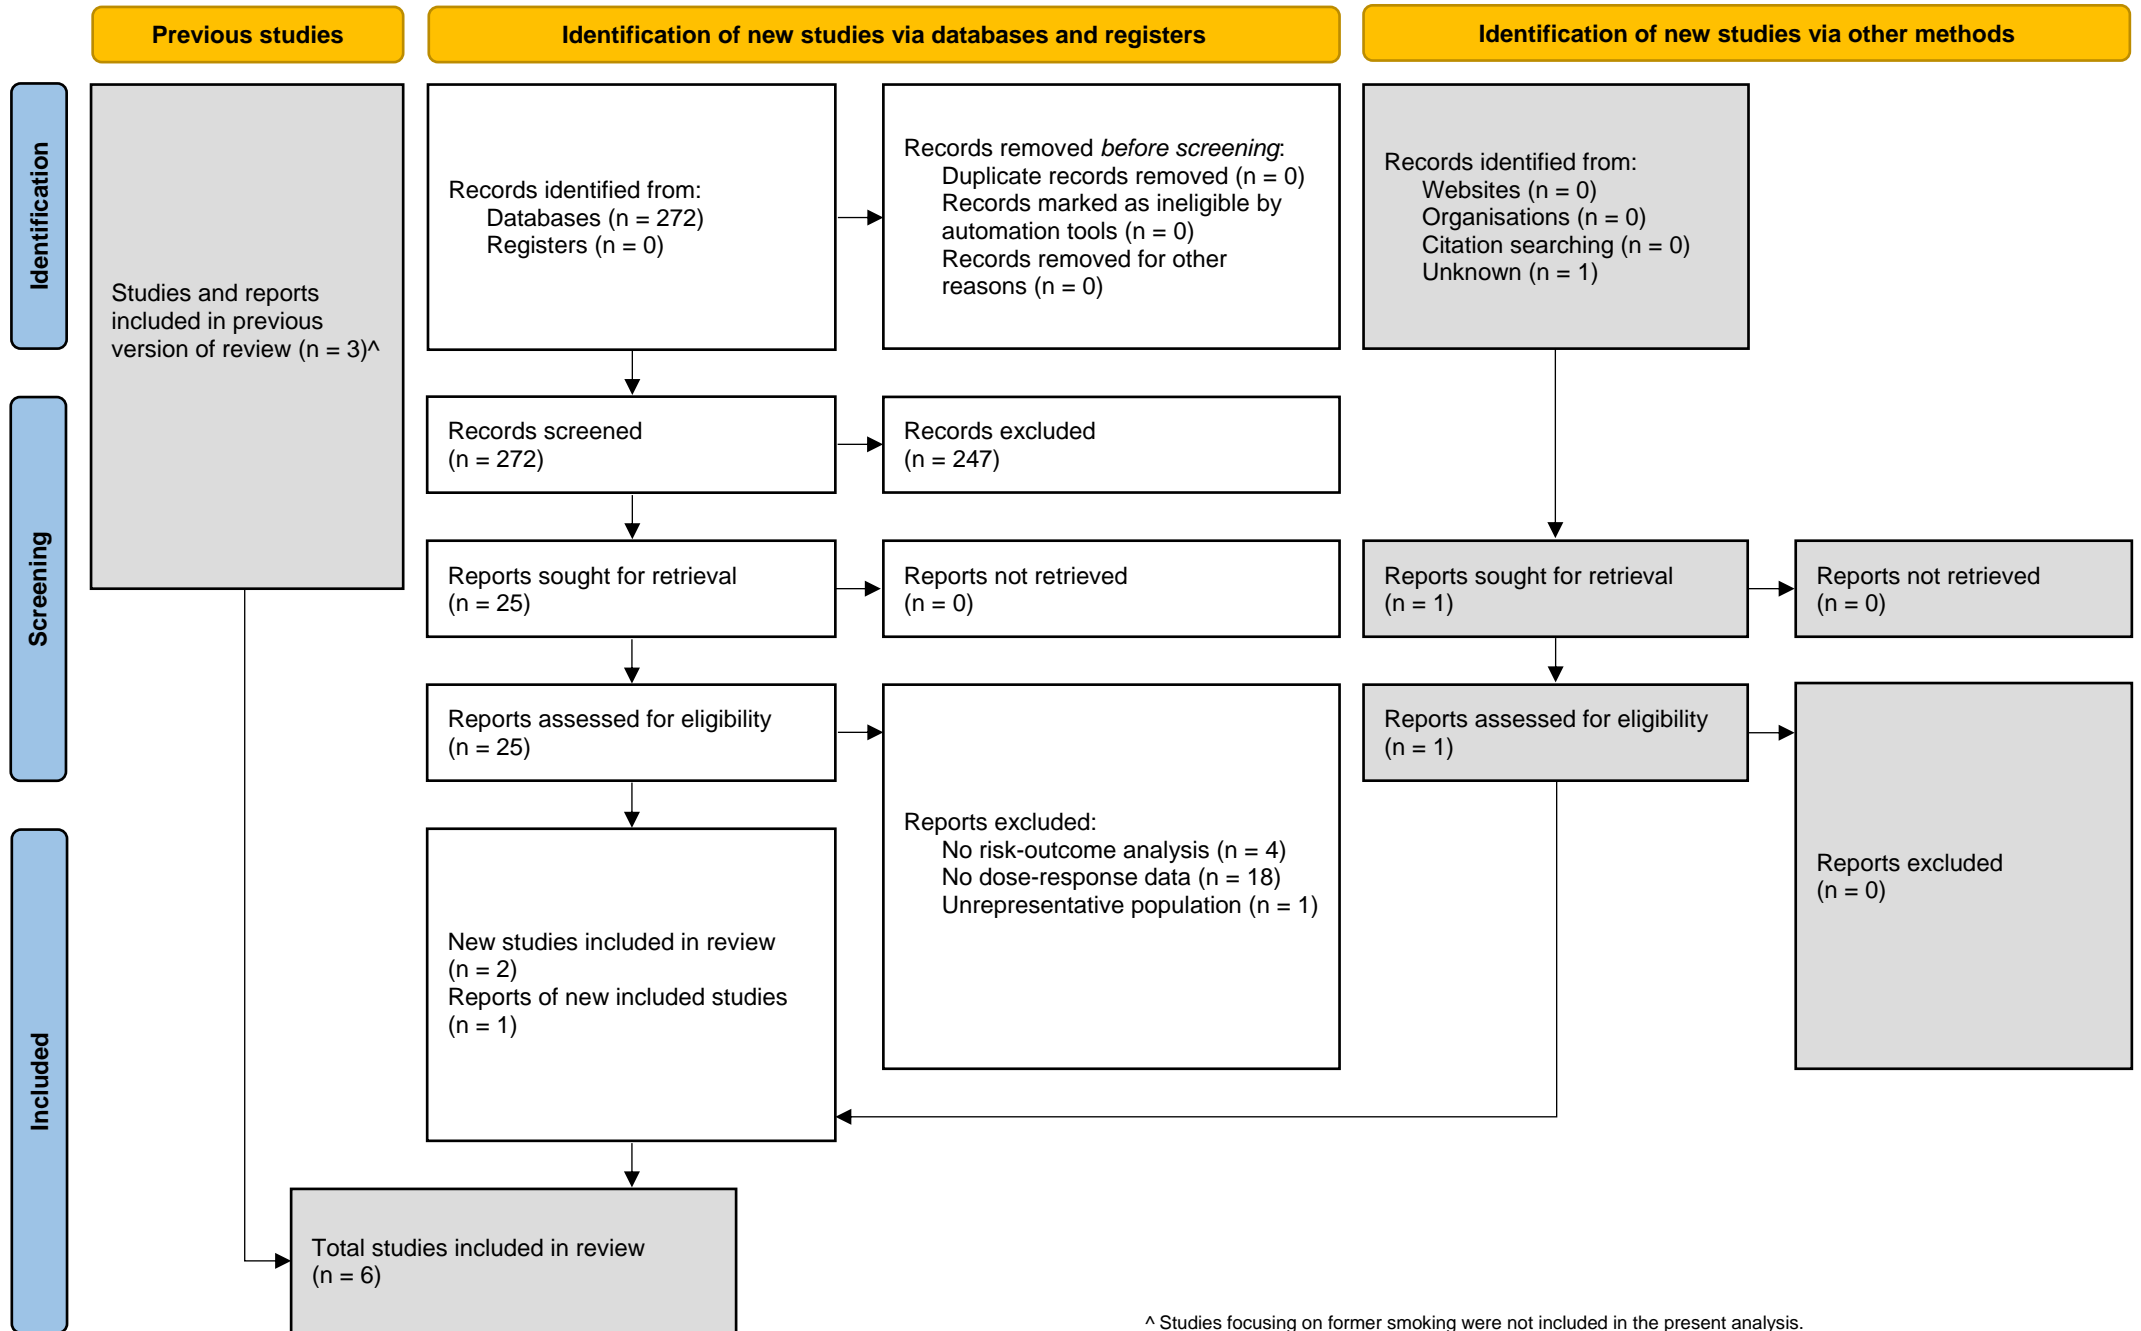

PRISMA 2020 flow diagram for an updated systematic review of the Smoking and Stroke risk-outcome pair

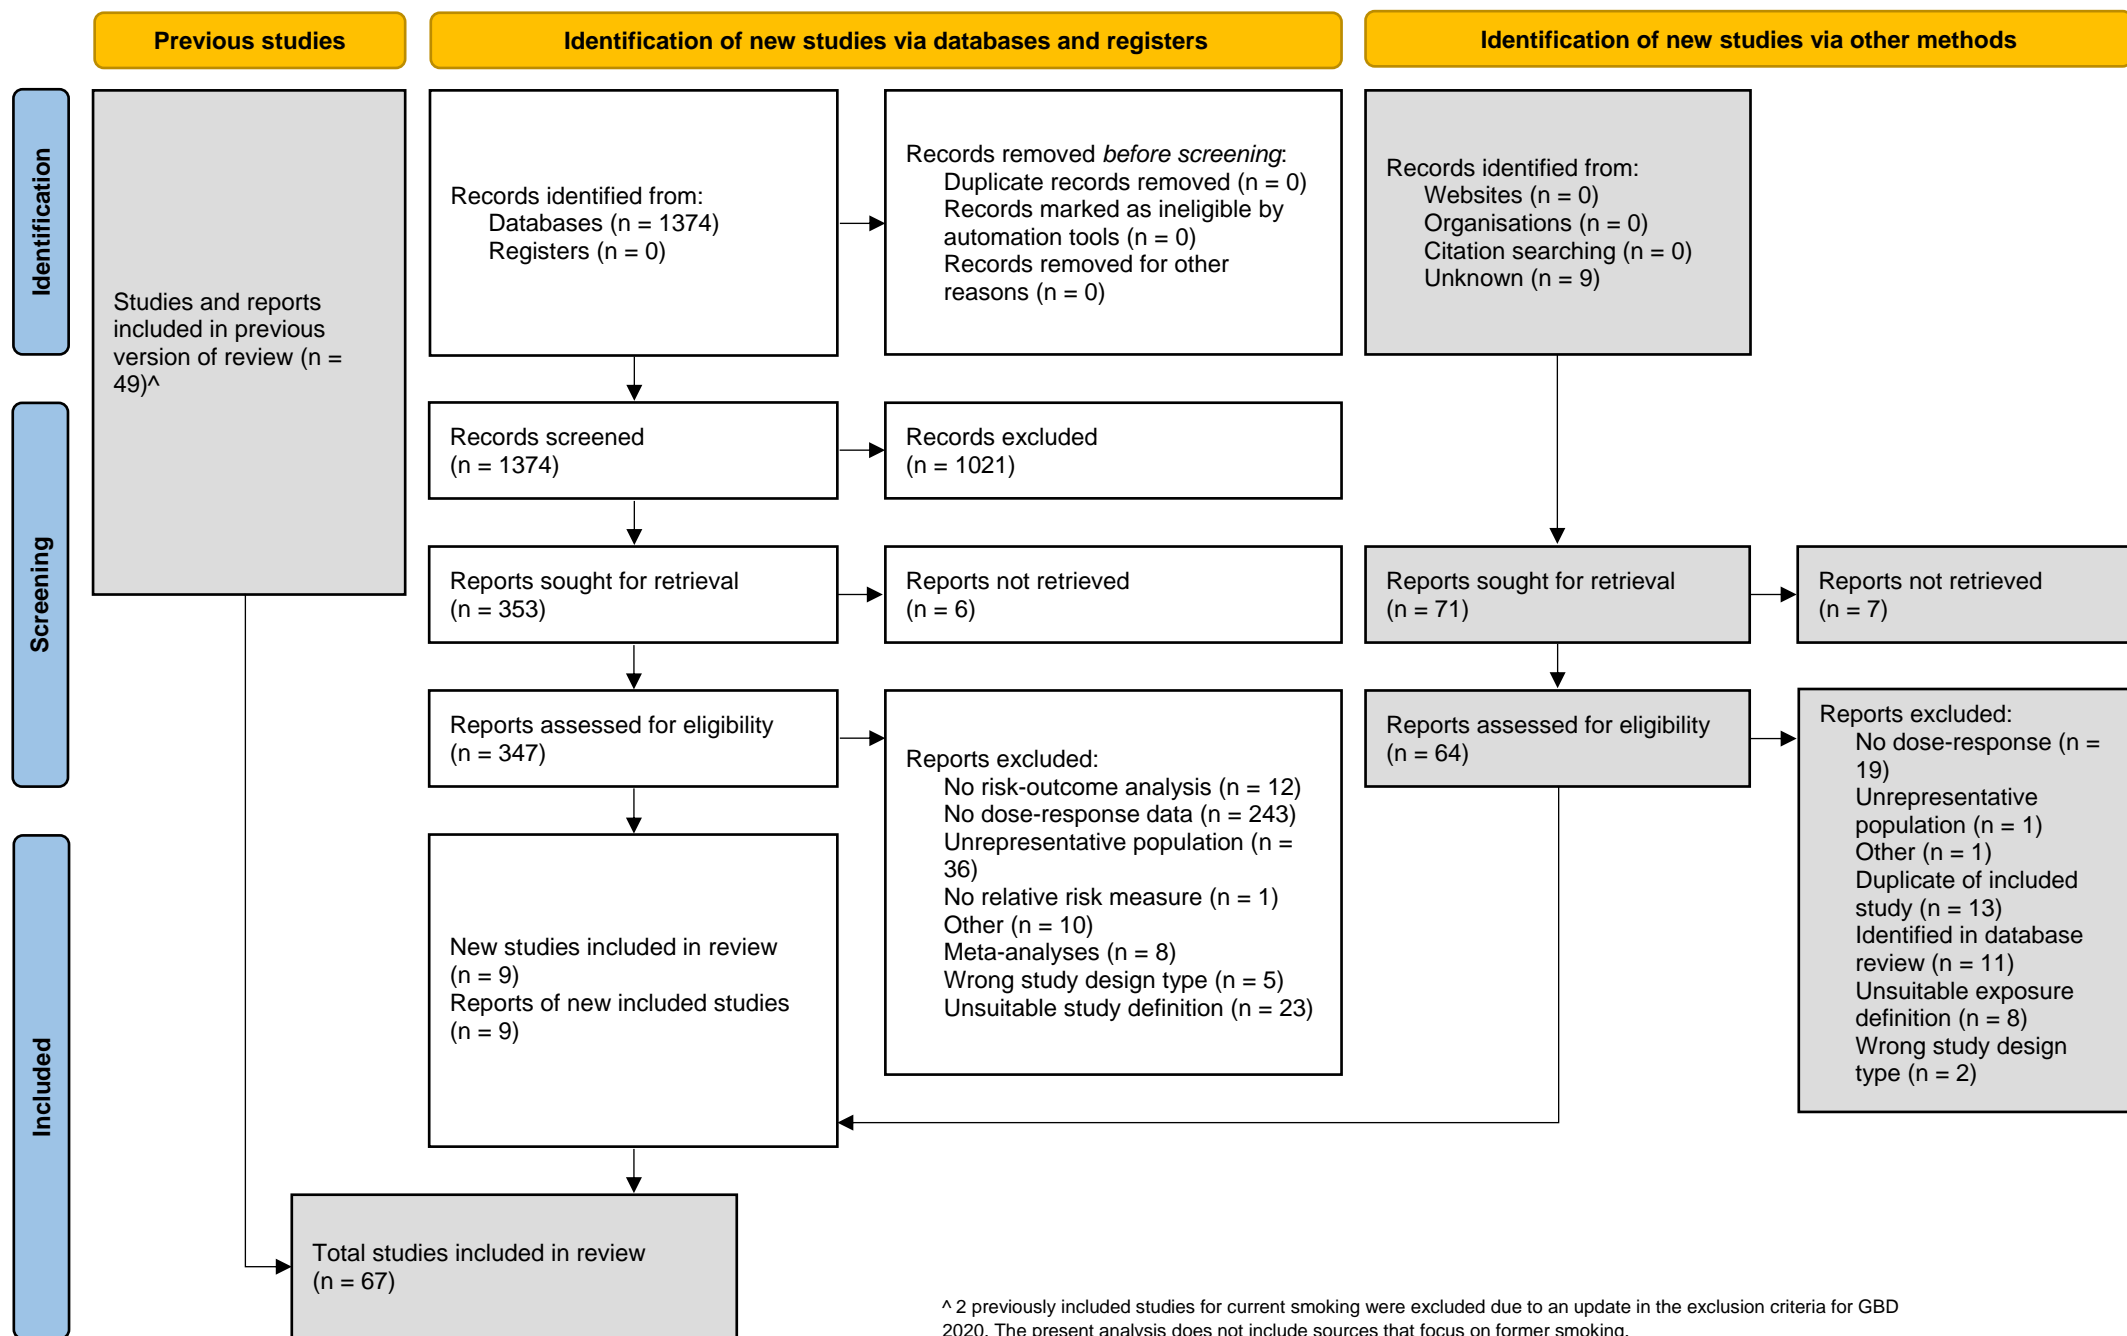

PRISMA 2020 flow diagram for an updated systematic review of the Smoking and Gallbladder and biliary diseases risk-outcome pair

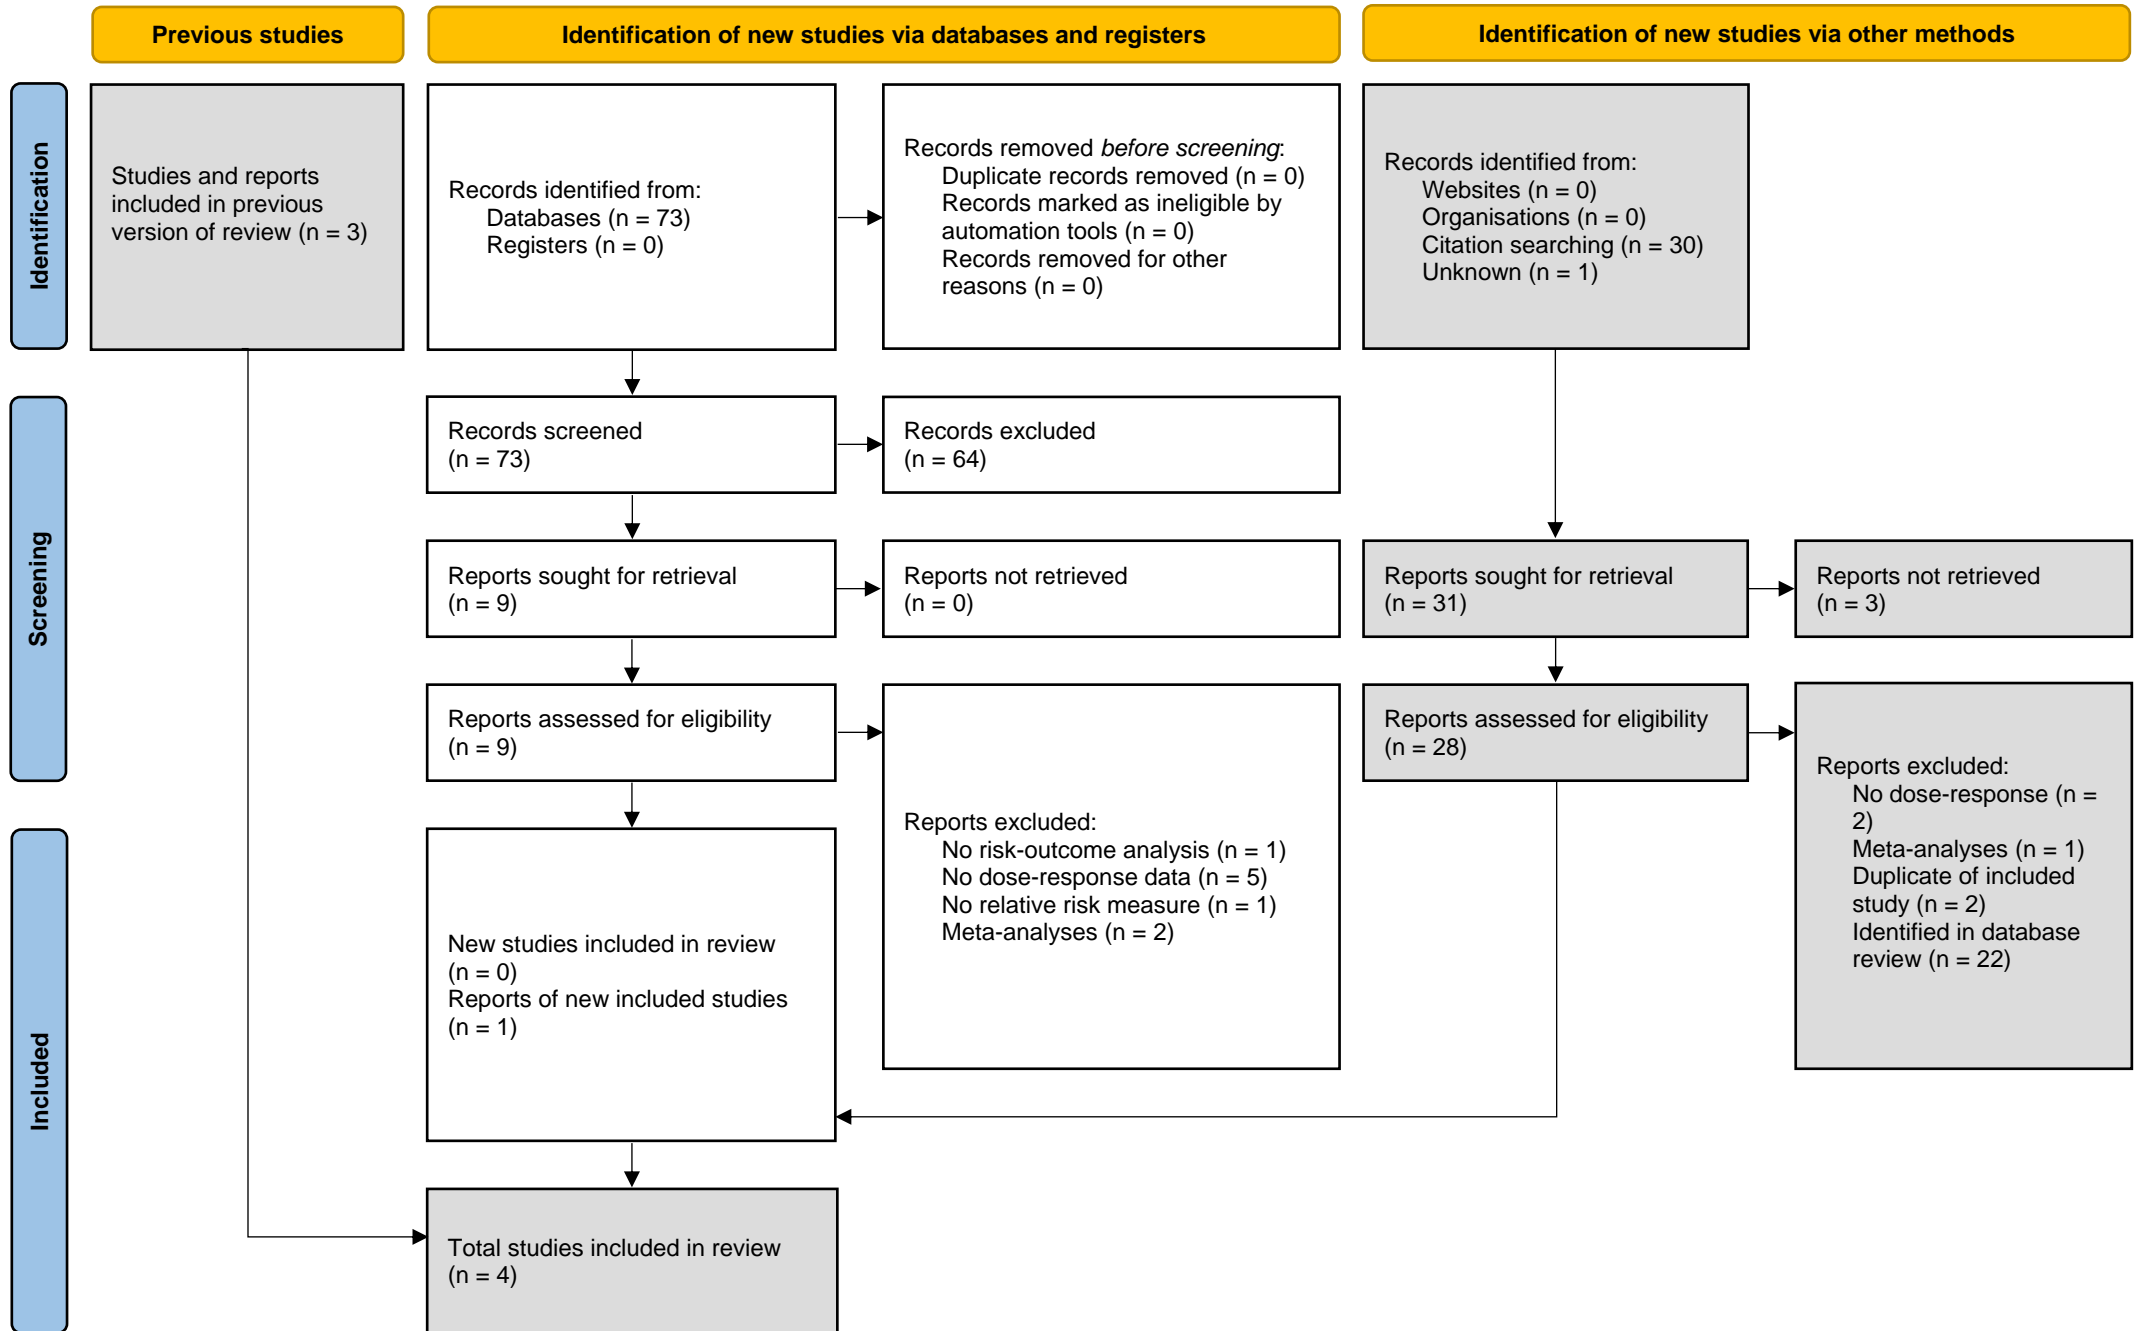

PRISMA 2020 flow diagram for an updated systematic review of the Smoking and Peptic ulcer disease risk-outcome pair

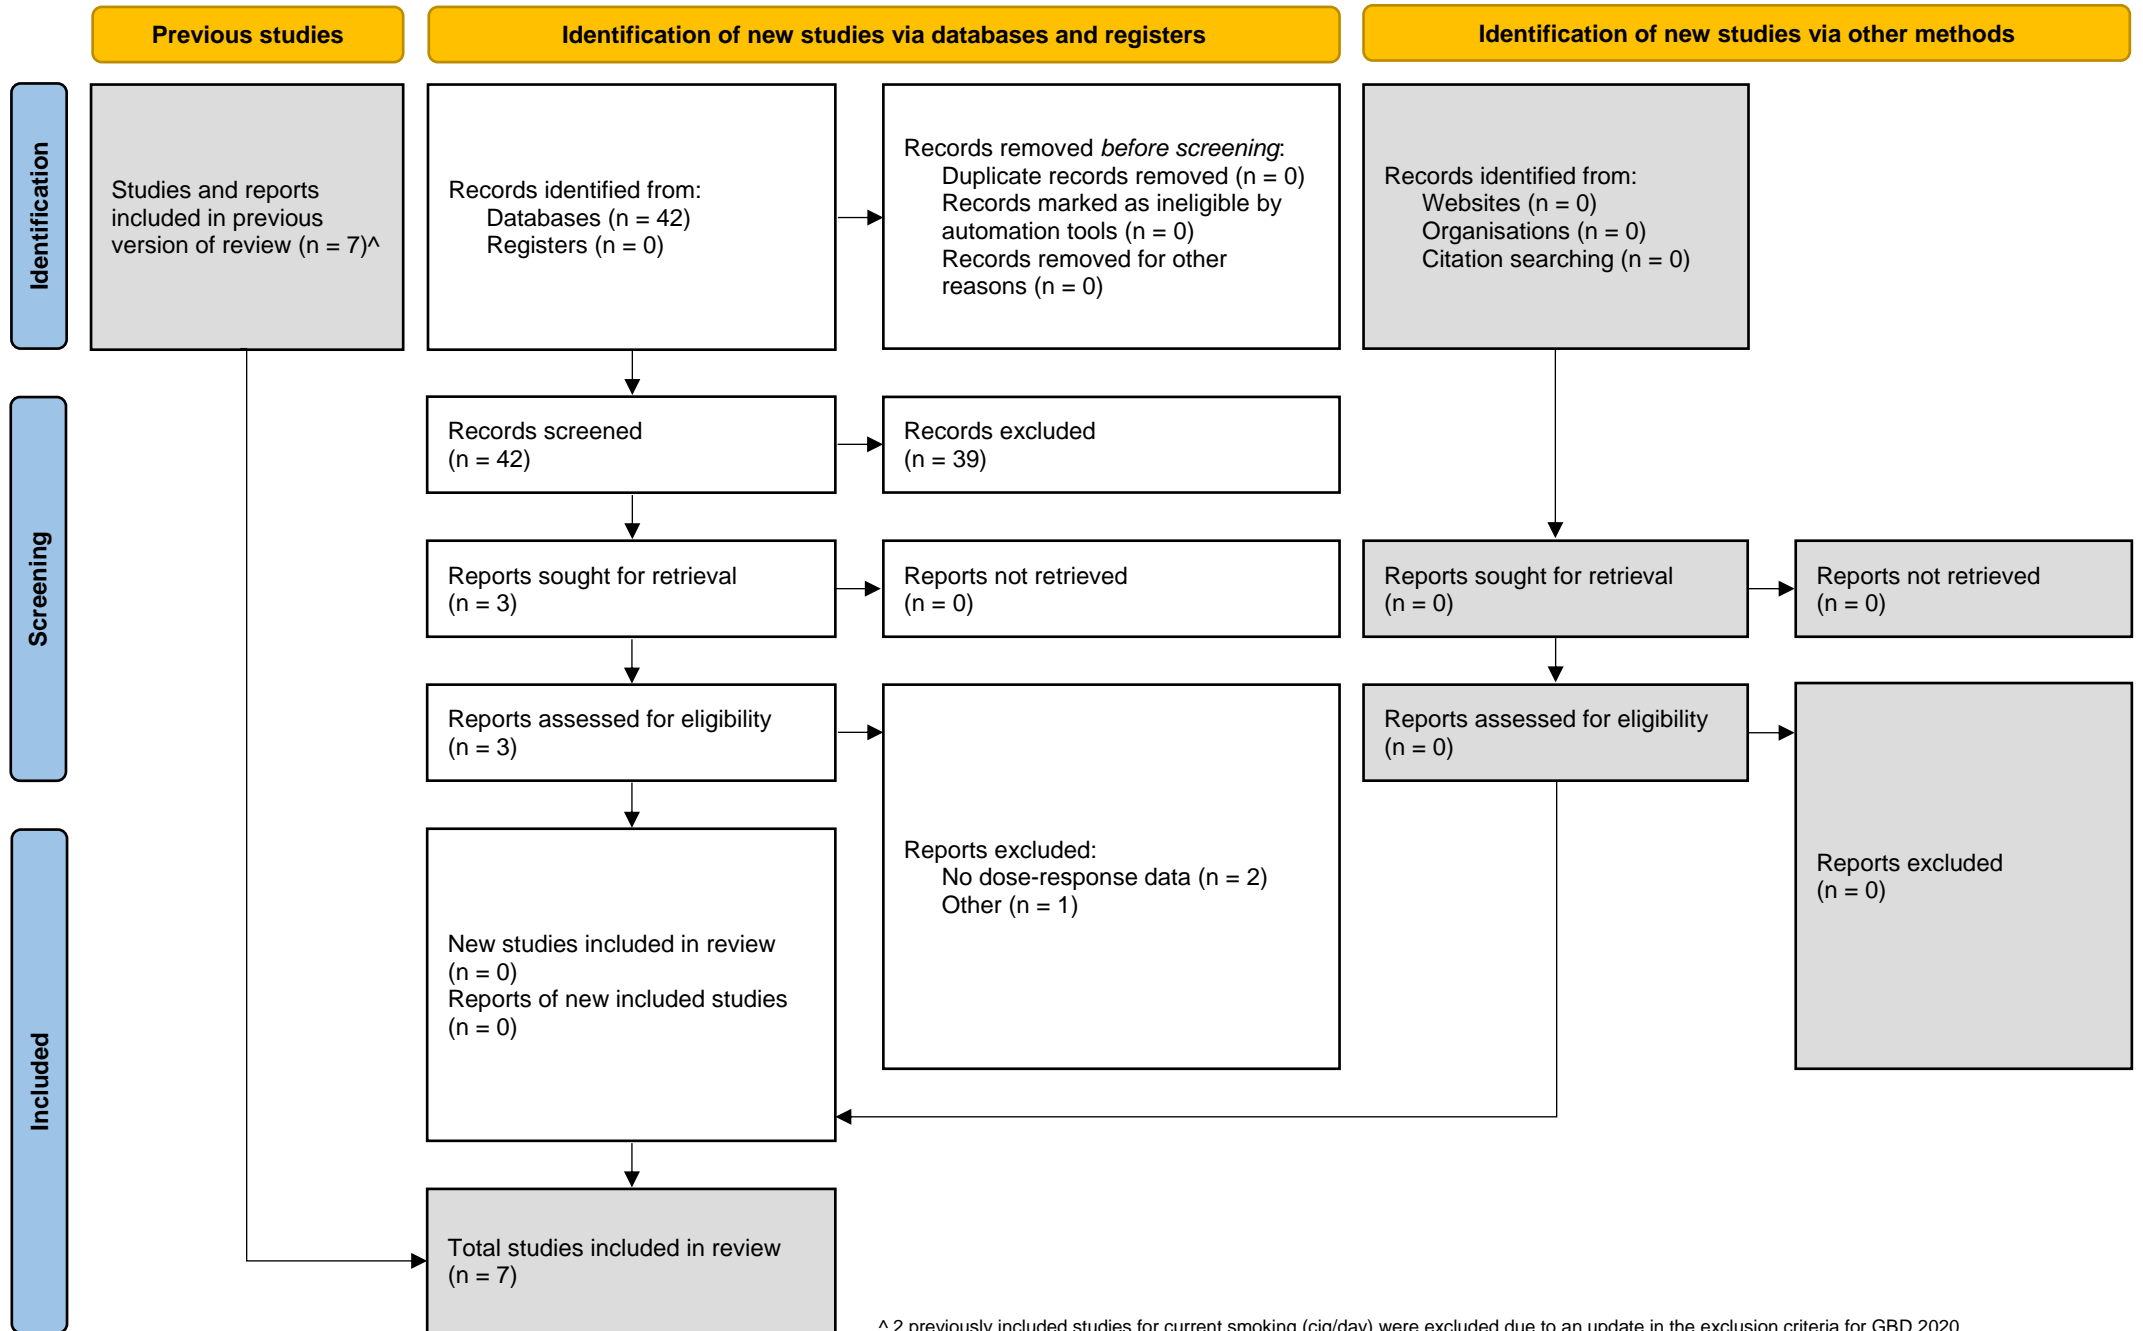

<sup>^</sup> 2 previously included studies for current smoking (cig/day) were excluded due to an update in the exclusion criteria for GBD 2020

PRISMA 2020 flow diagram for an updated systematic review of the Smoking and Lower respiratory infections risk-outcome pair

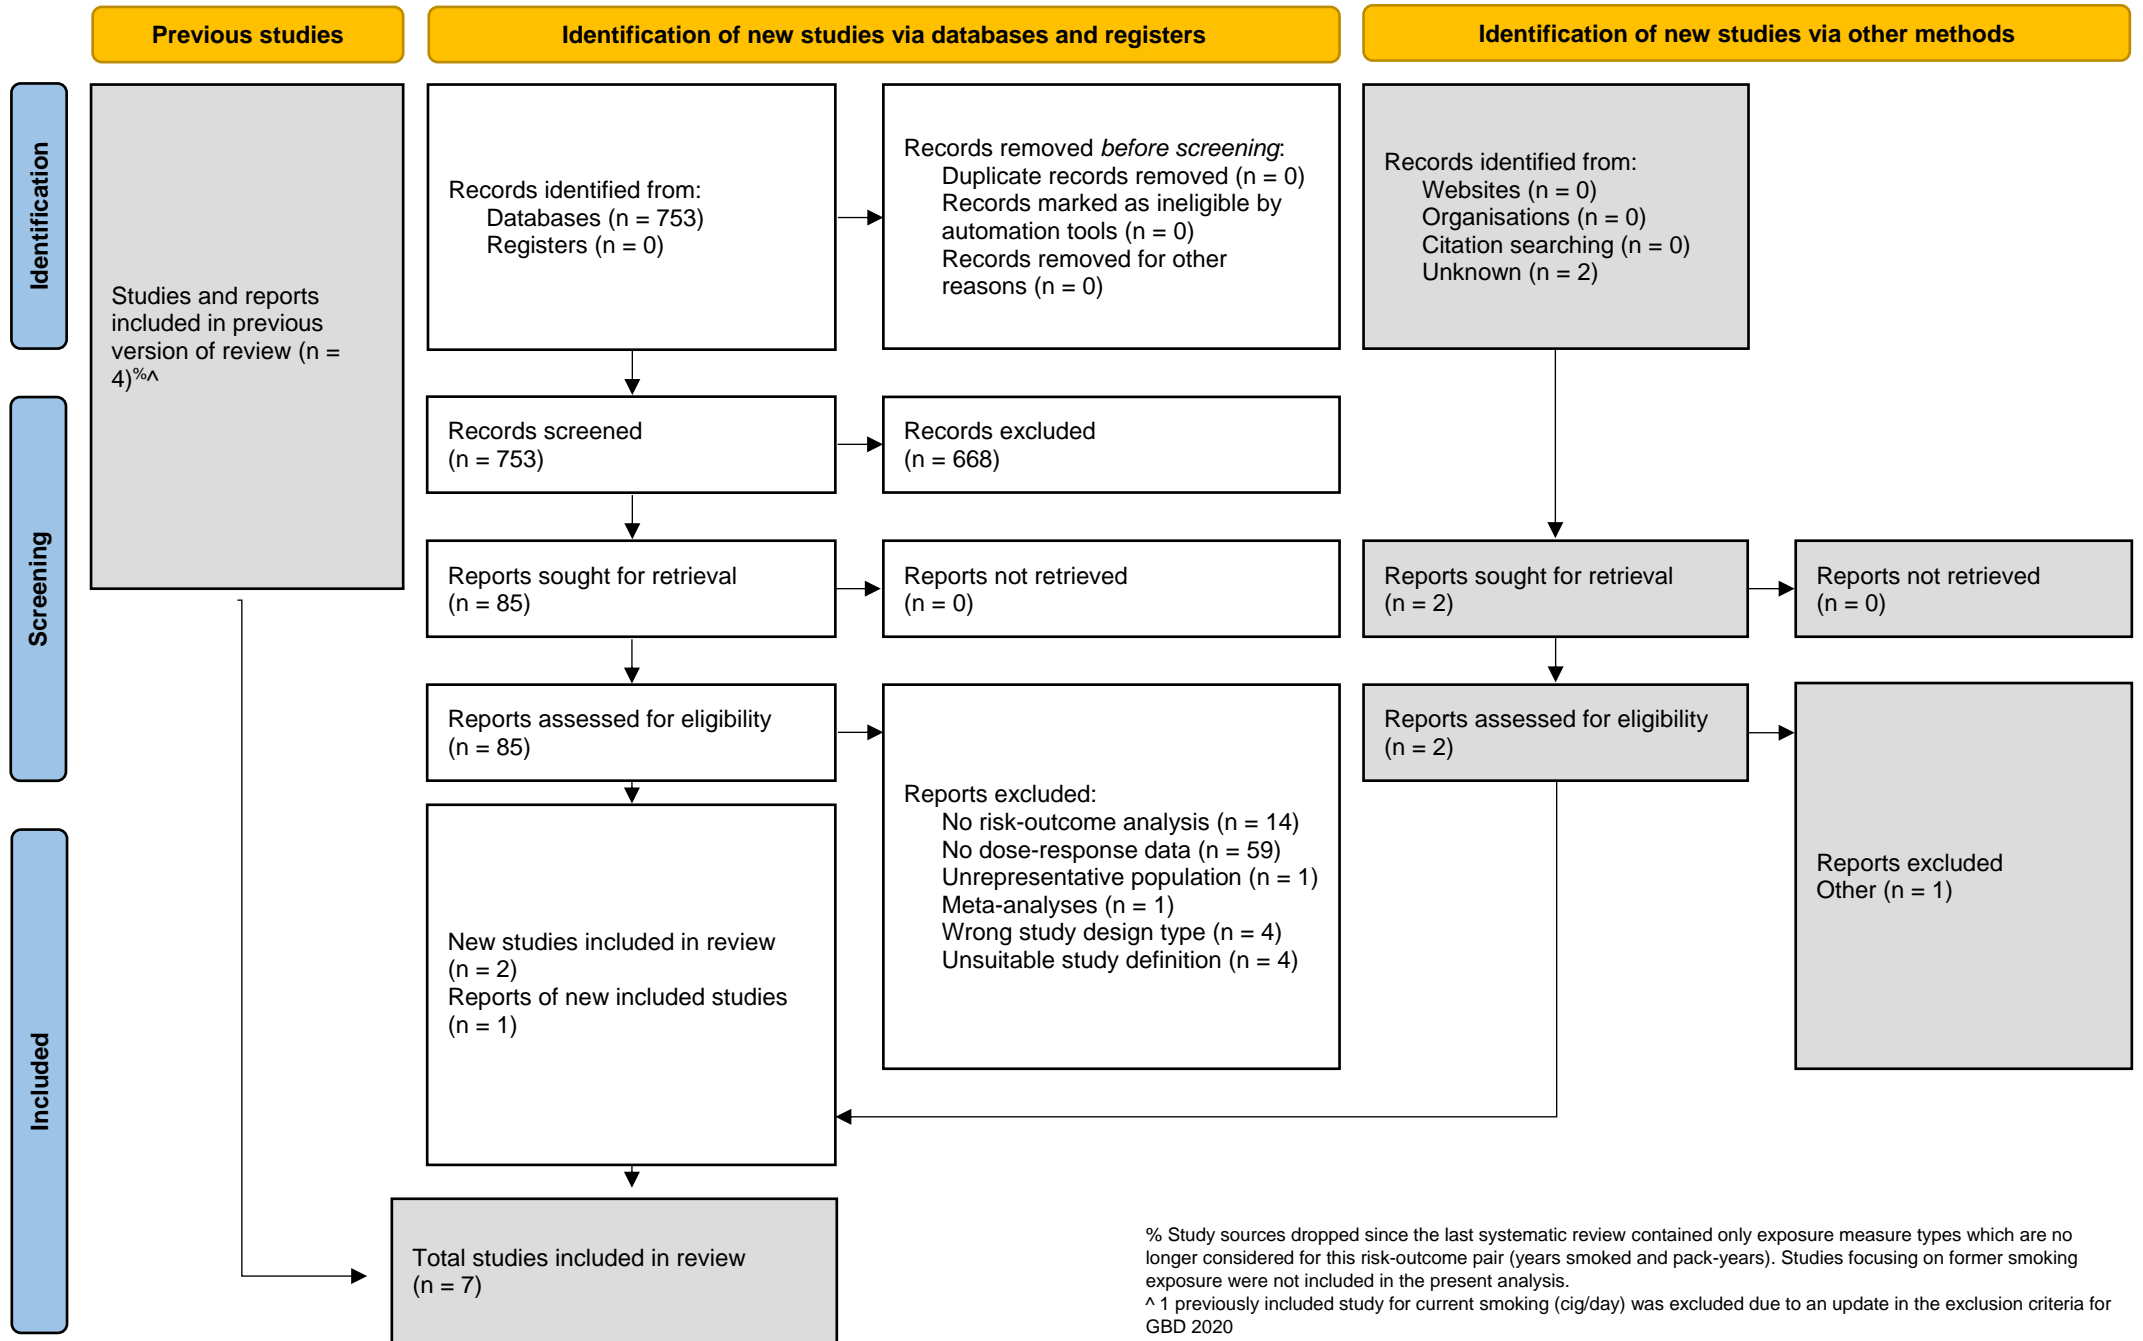

PRISMA 2020 flow diagram for an updated systematic review of the Smoking and Low back pain risk-outcome pair

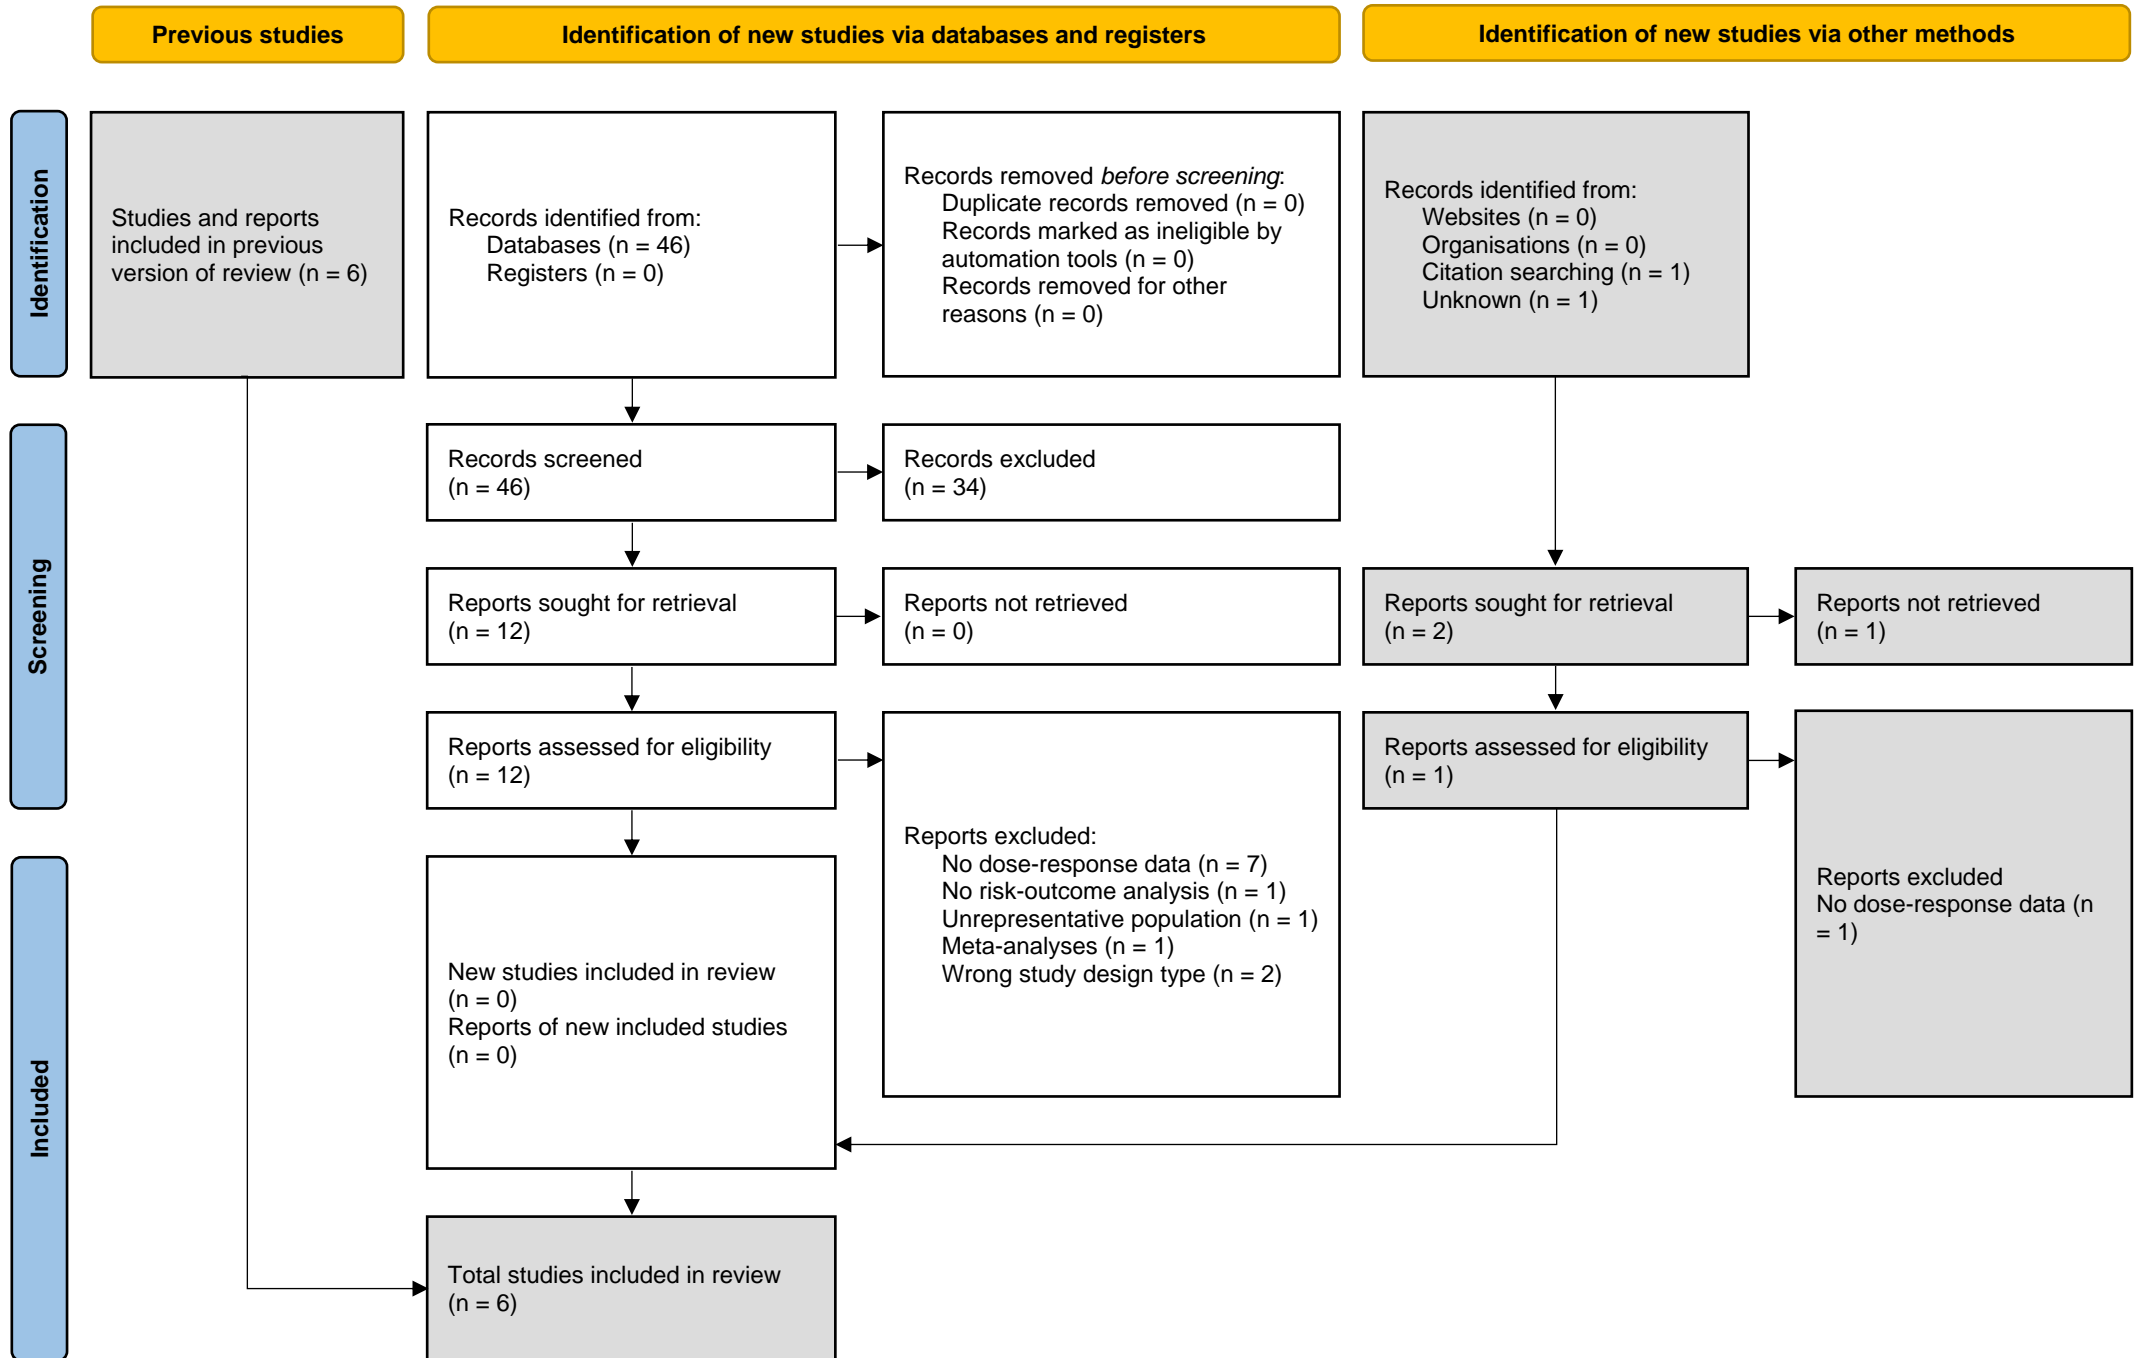

PRISMA 2020 flow diagram for an updated systematic review of the Smoking and Rheumatoid arthritis risk-outcome pair

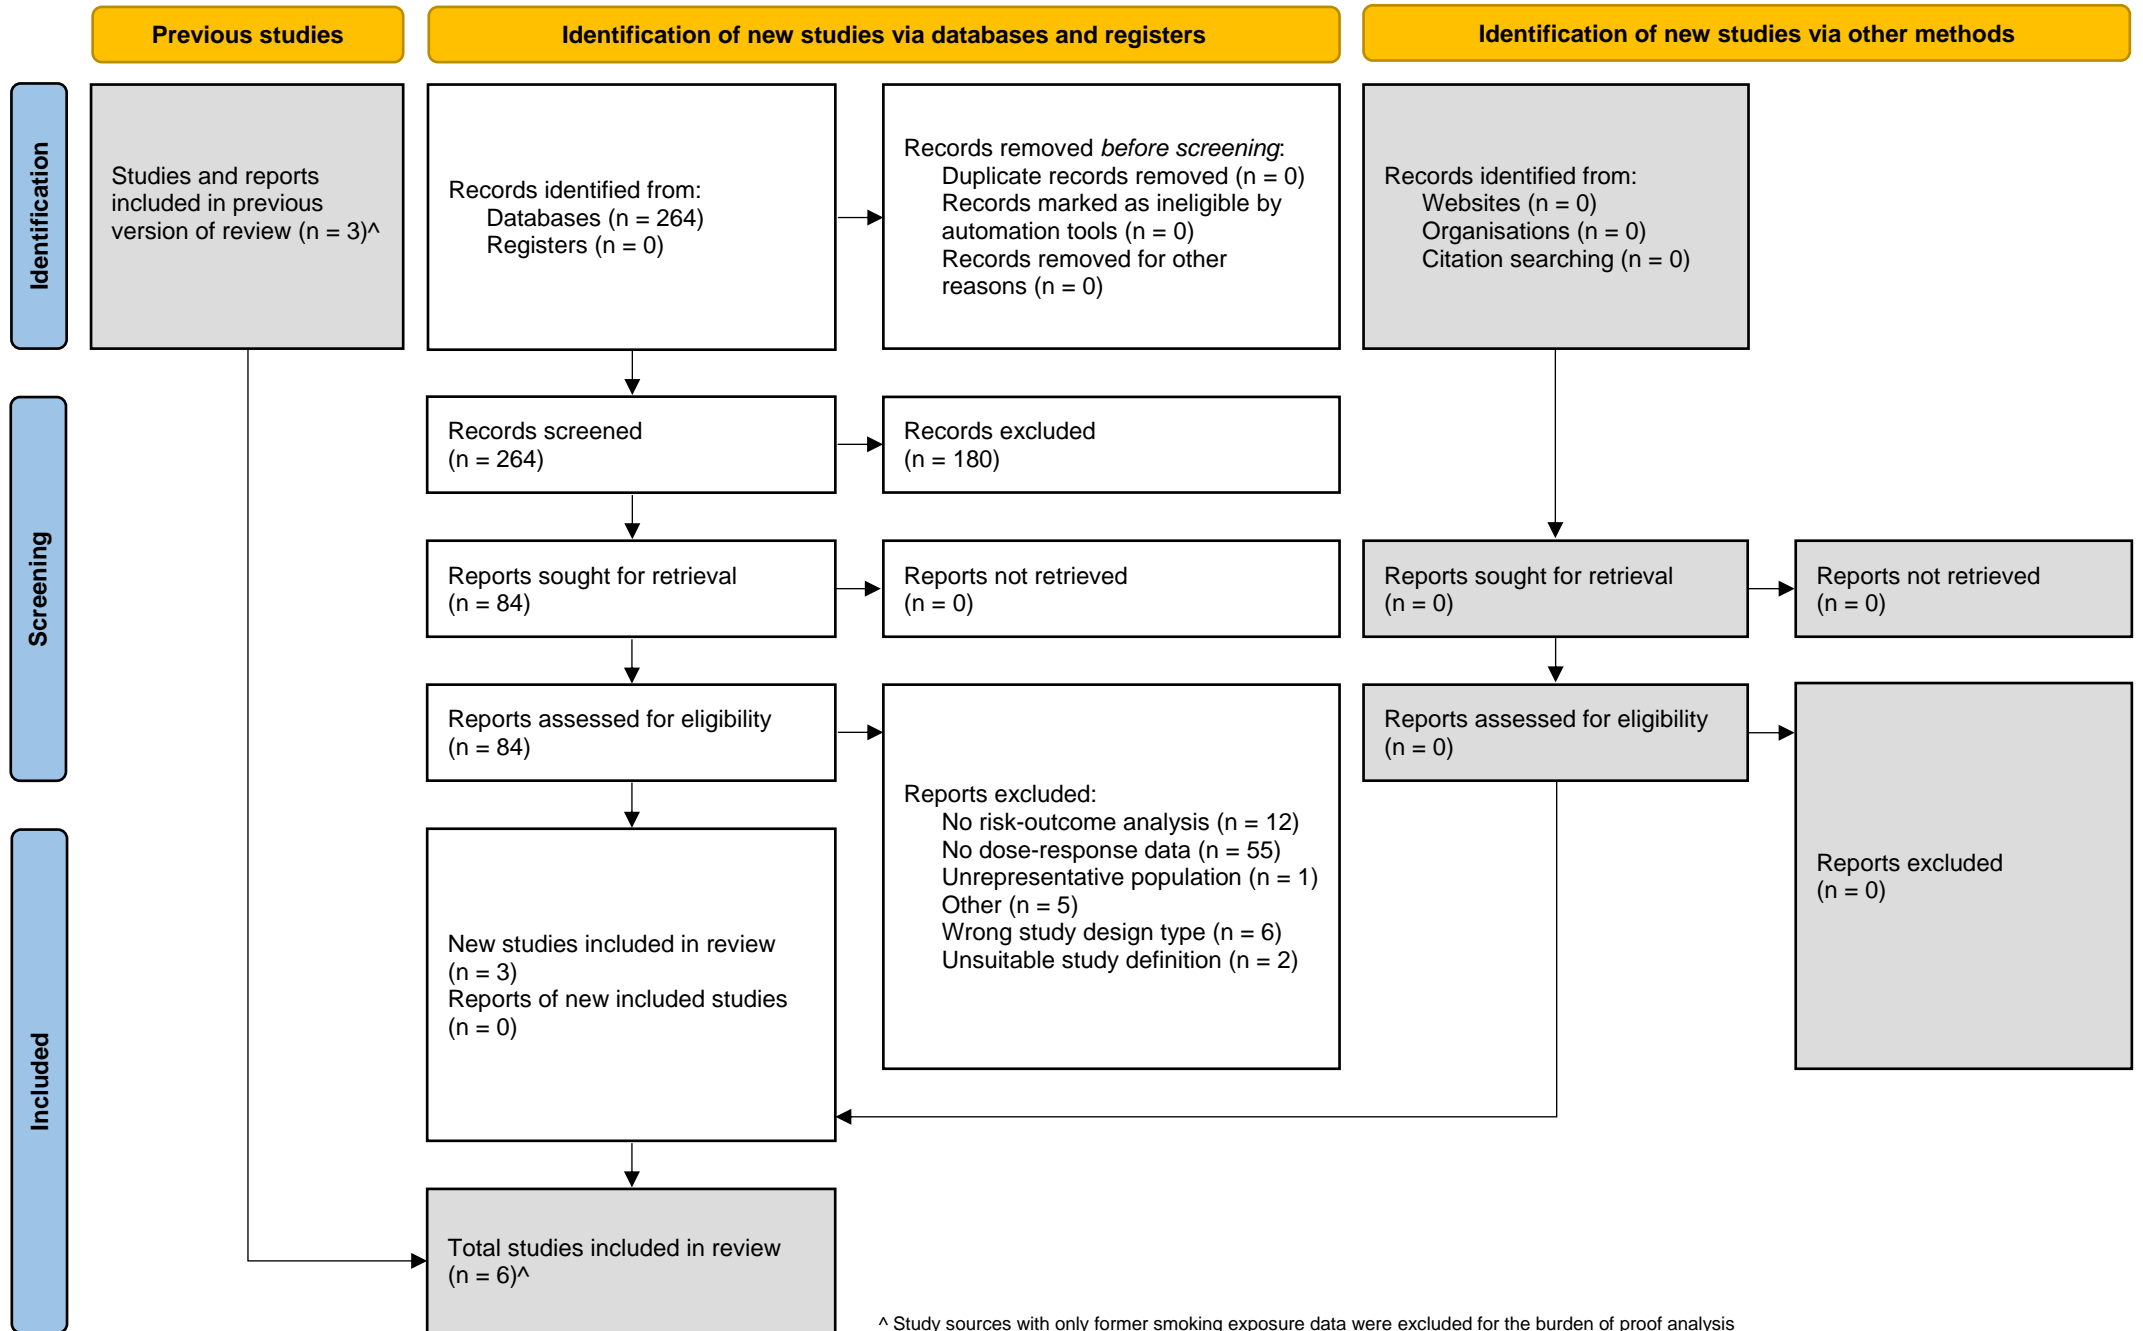



PRISMA 2020 flow diagram for an updated systematic review of the Smoking and Bladder cancer risk-outcome pair

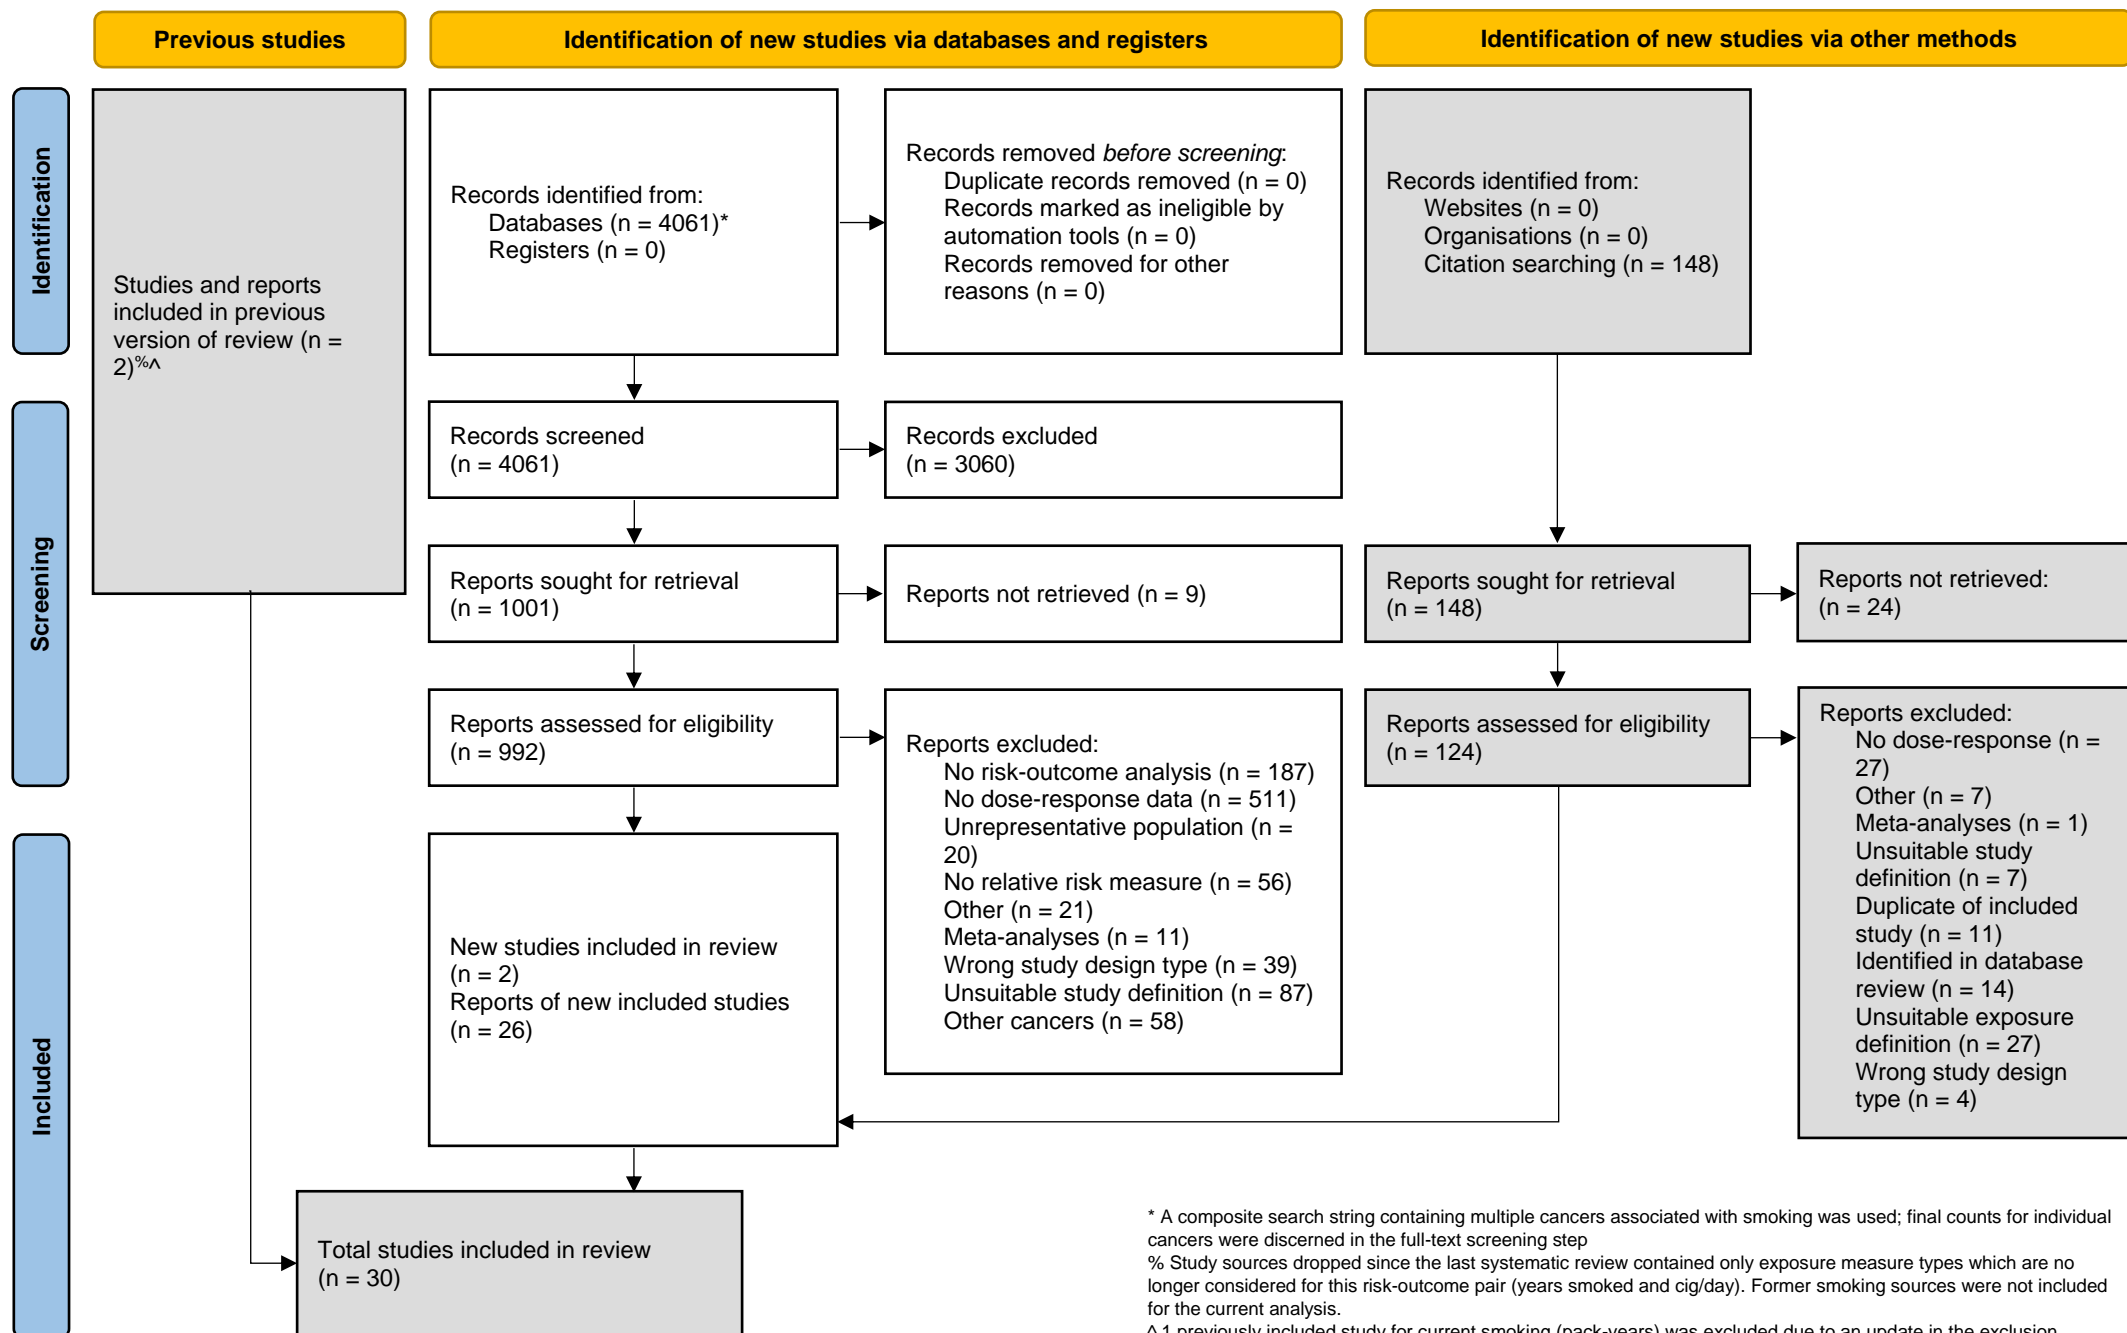

\* A composite search string containing multiple cancers associated with smoking was used; final counts for individual cancers were discerned in the full-text screening step  
 % Study sources dropped since the last systematic review contained only exposure measure types which are no longer considered for this risk-outcome pair (years smoked and cig/day). Former smoking sources were not included for the current analysis.  
 ^ 1 previously included study for current smoking (pack-years) was excluded due to an update in the exclusion criteria for GBD 2020

PRISMA 2020 flow diagram for an updated systematic review of the Smoking and Cervical cancer risk-outcome pair

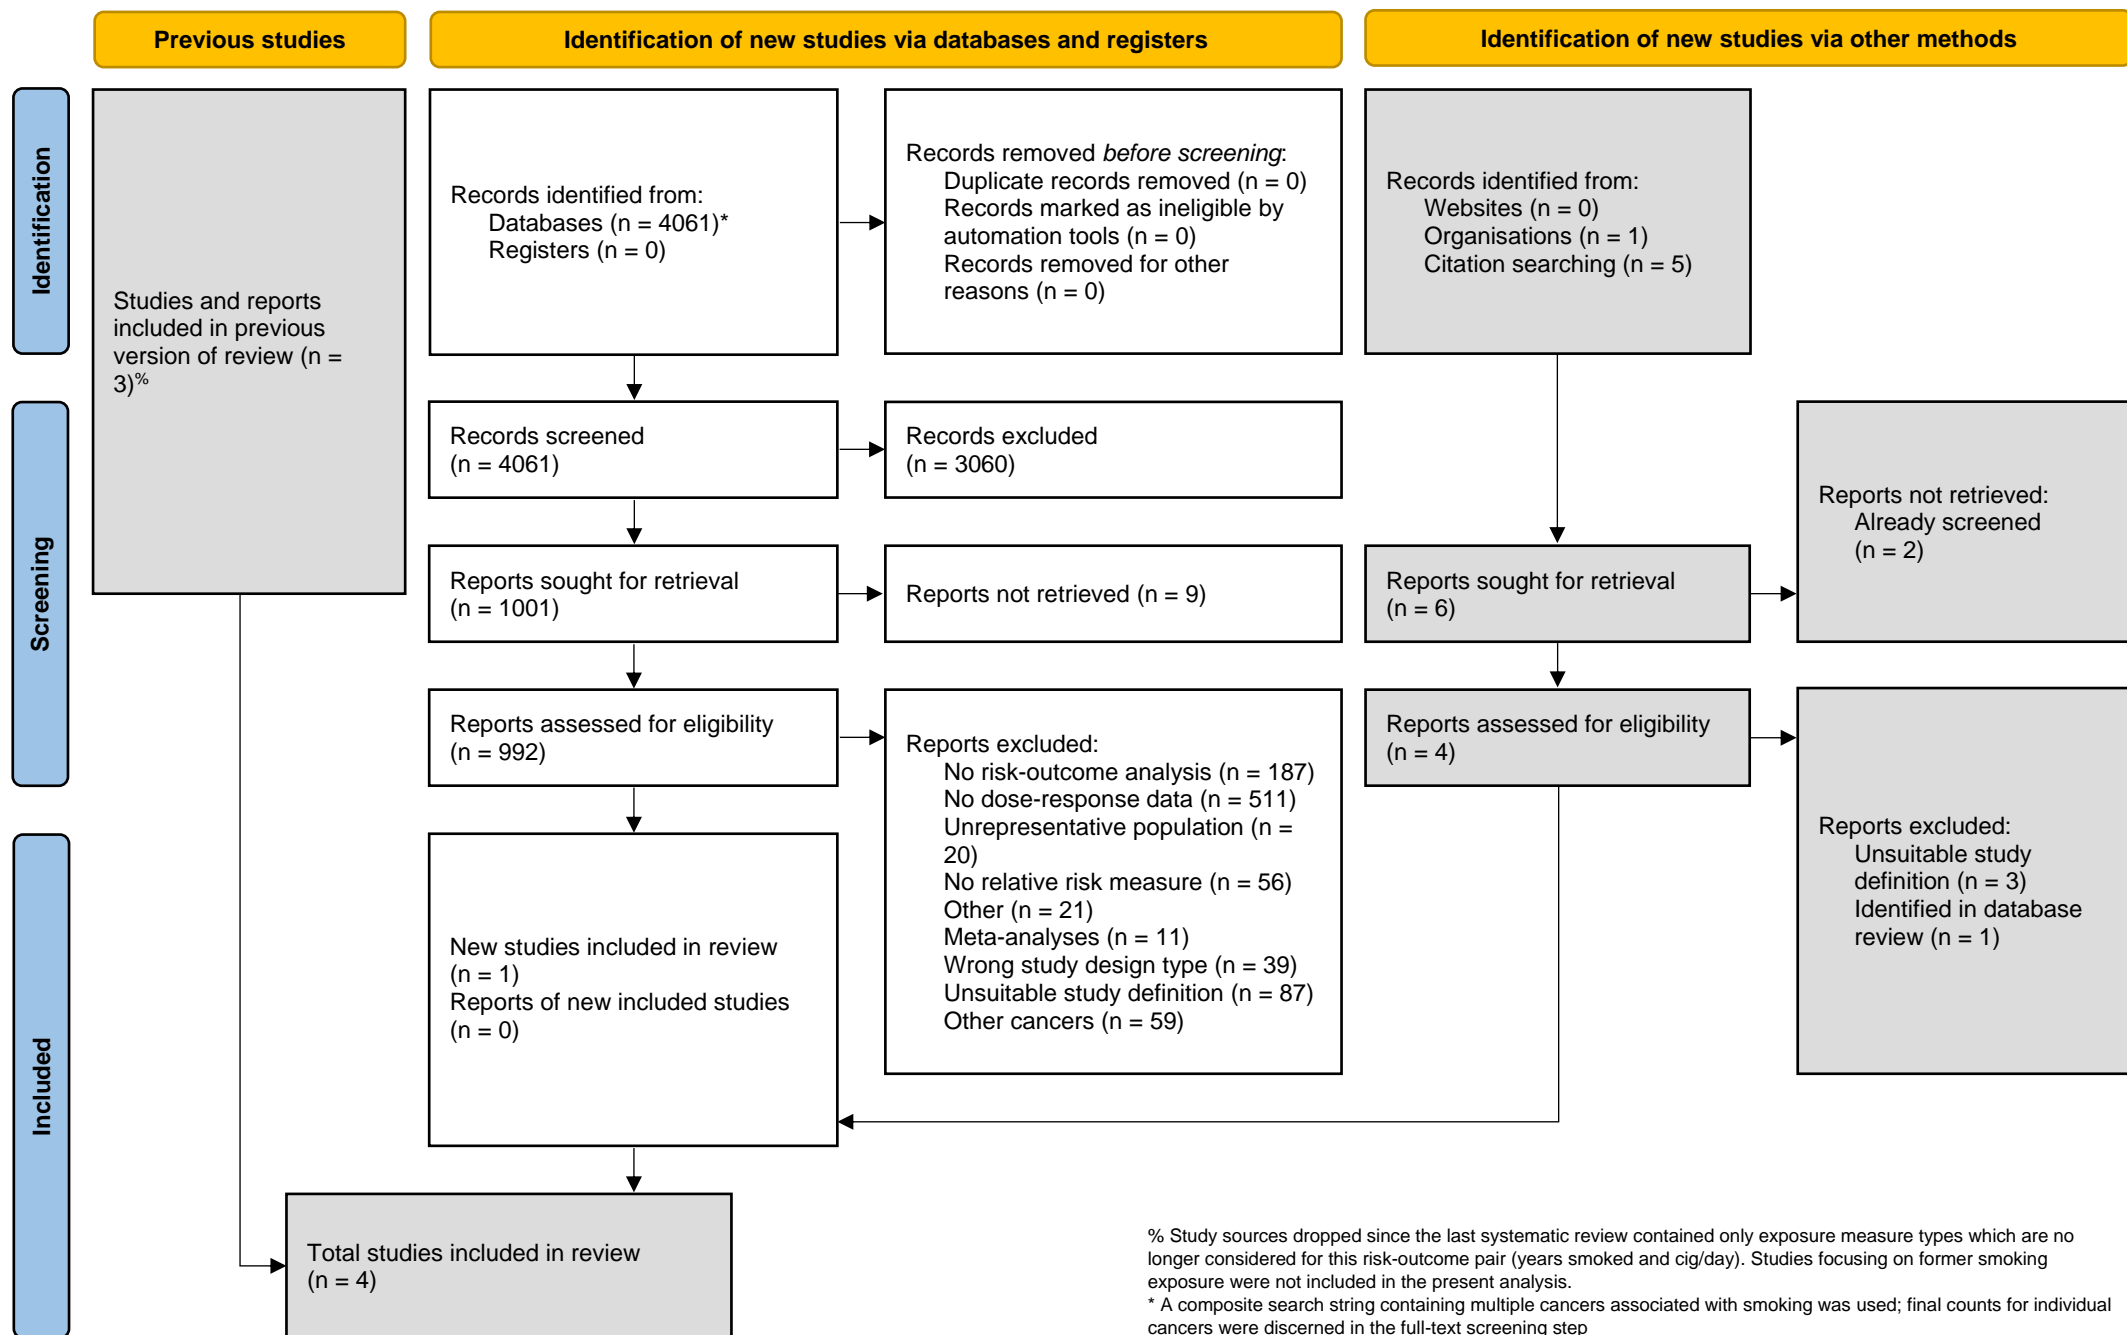

PRISMA 2020 flow diagram for an updated systematic review of the Smoking and Colon and rectum cancer risk-outcome pair

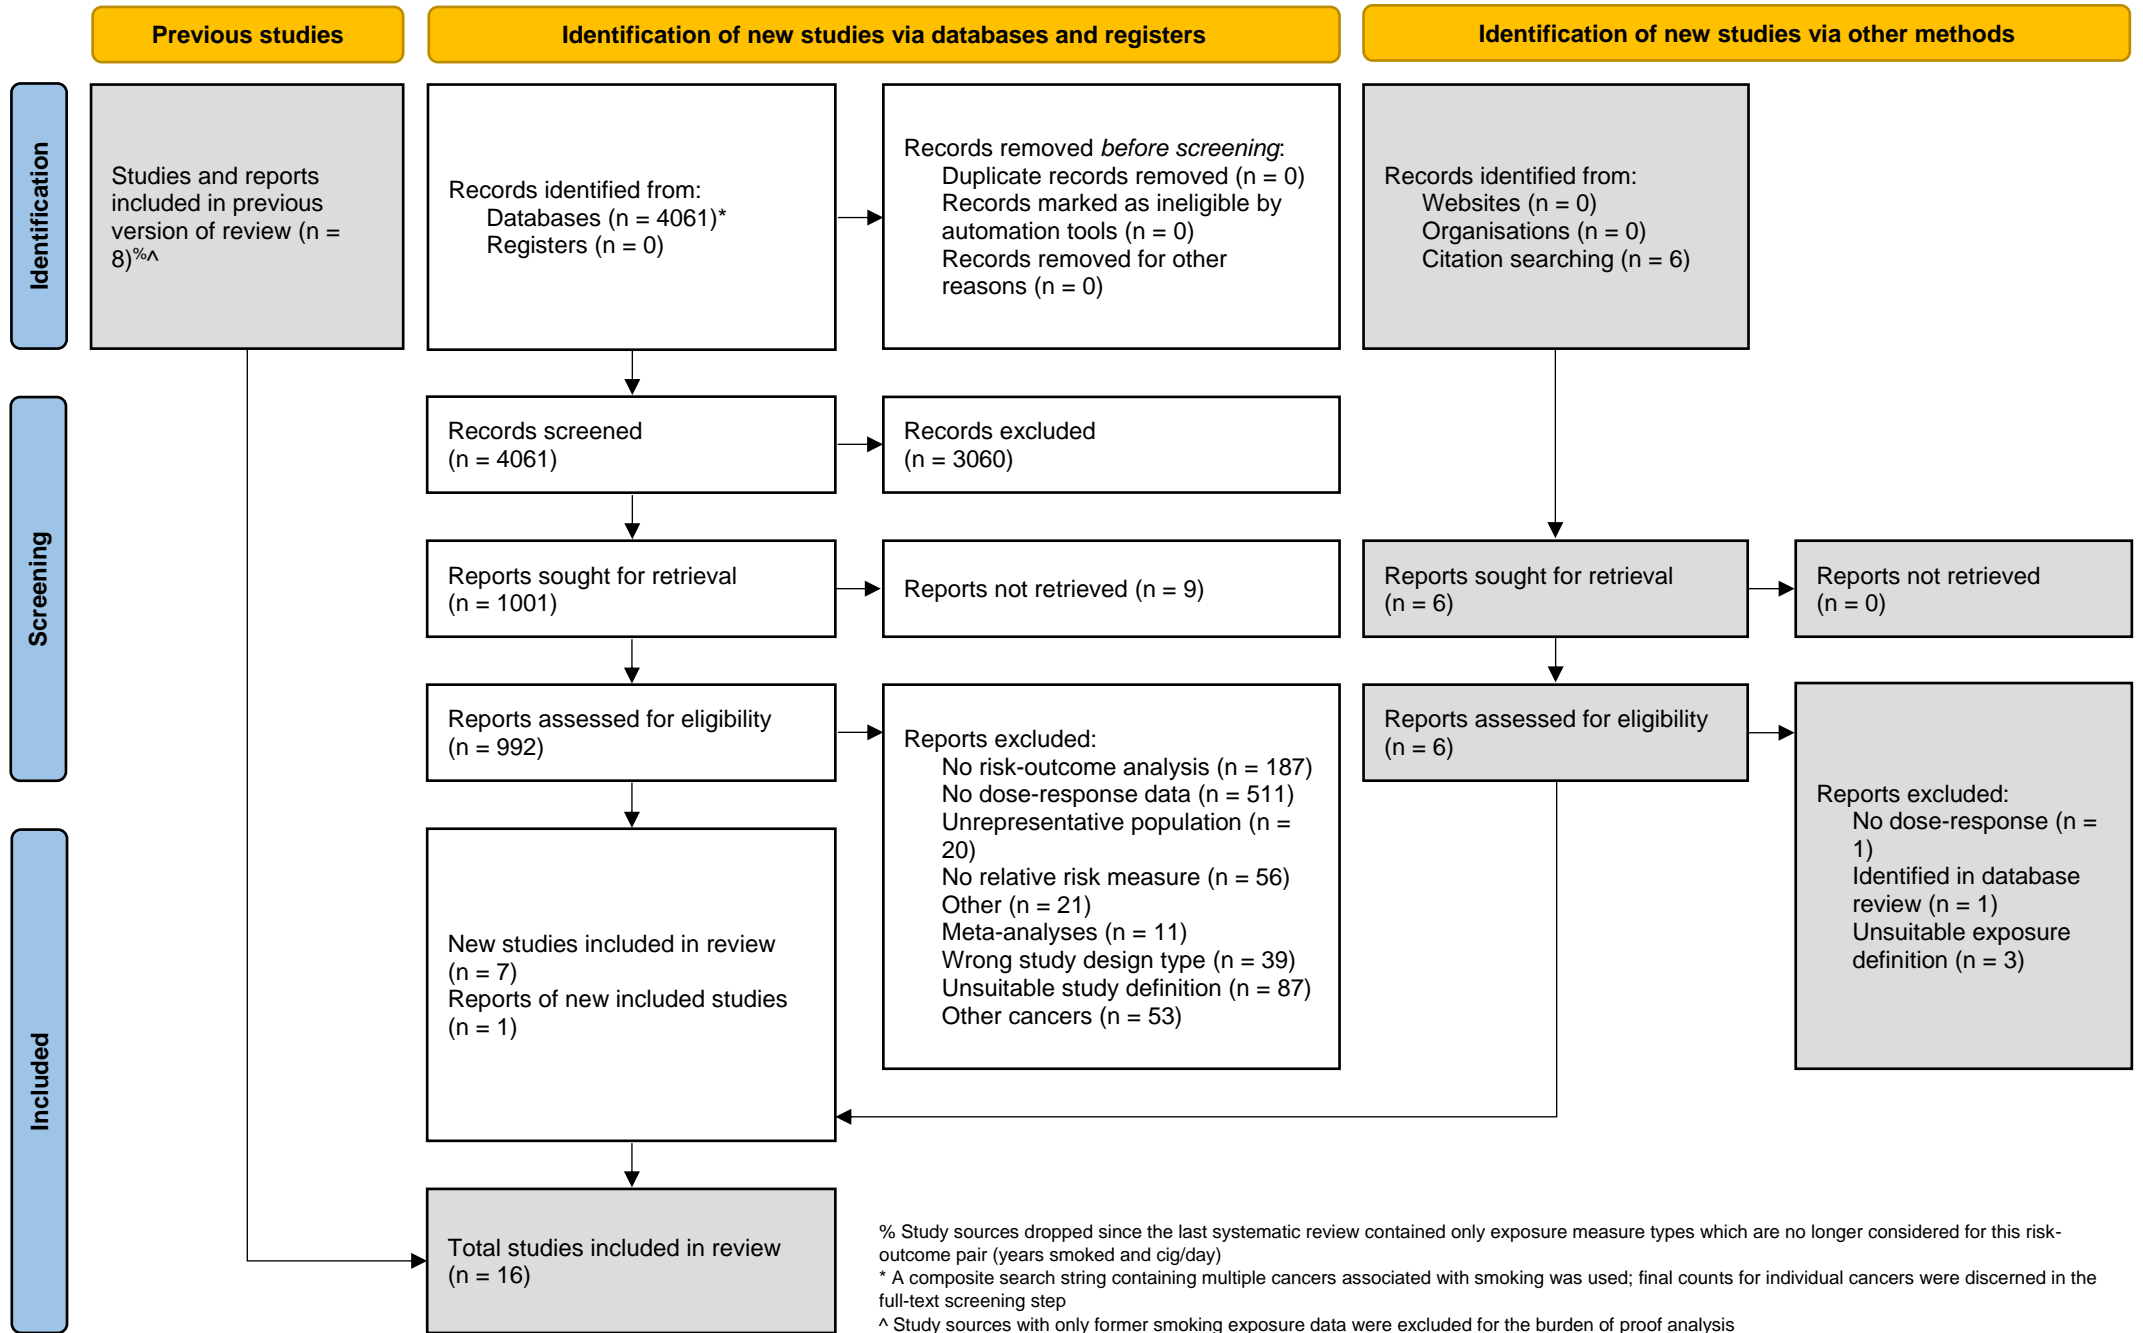

PRISMA 2020 flow diagram for an updated systematic review of the Smoking and Esophageal cancer risk-outcome pair

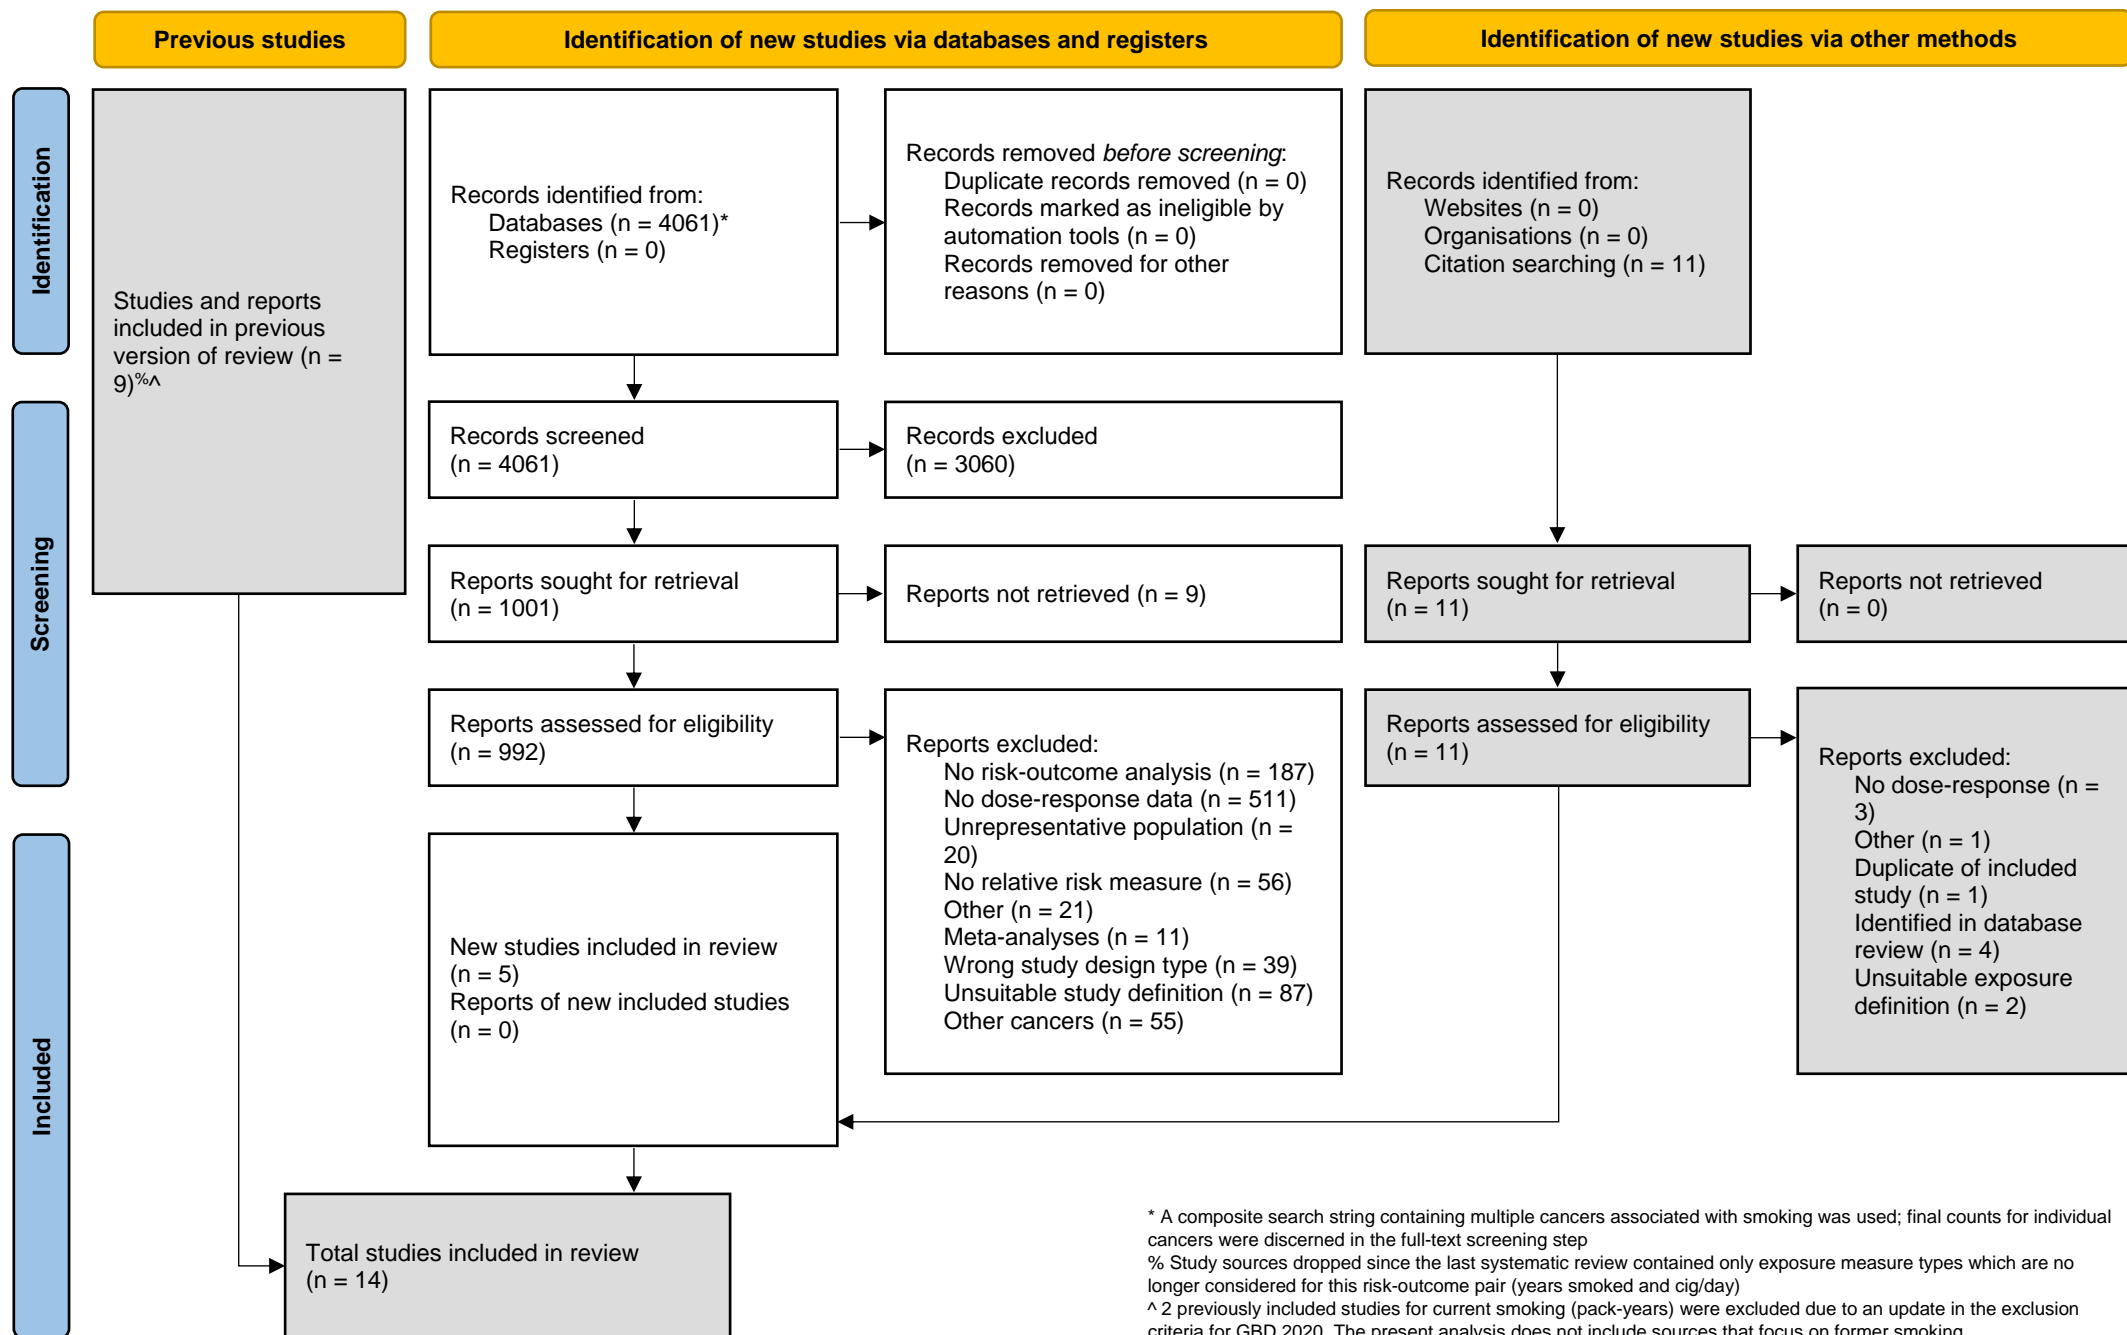

PRISMA 2020 flow diagram for an updated systematic review of the Smoking and Kidney cancer risk-outcome pair

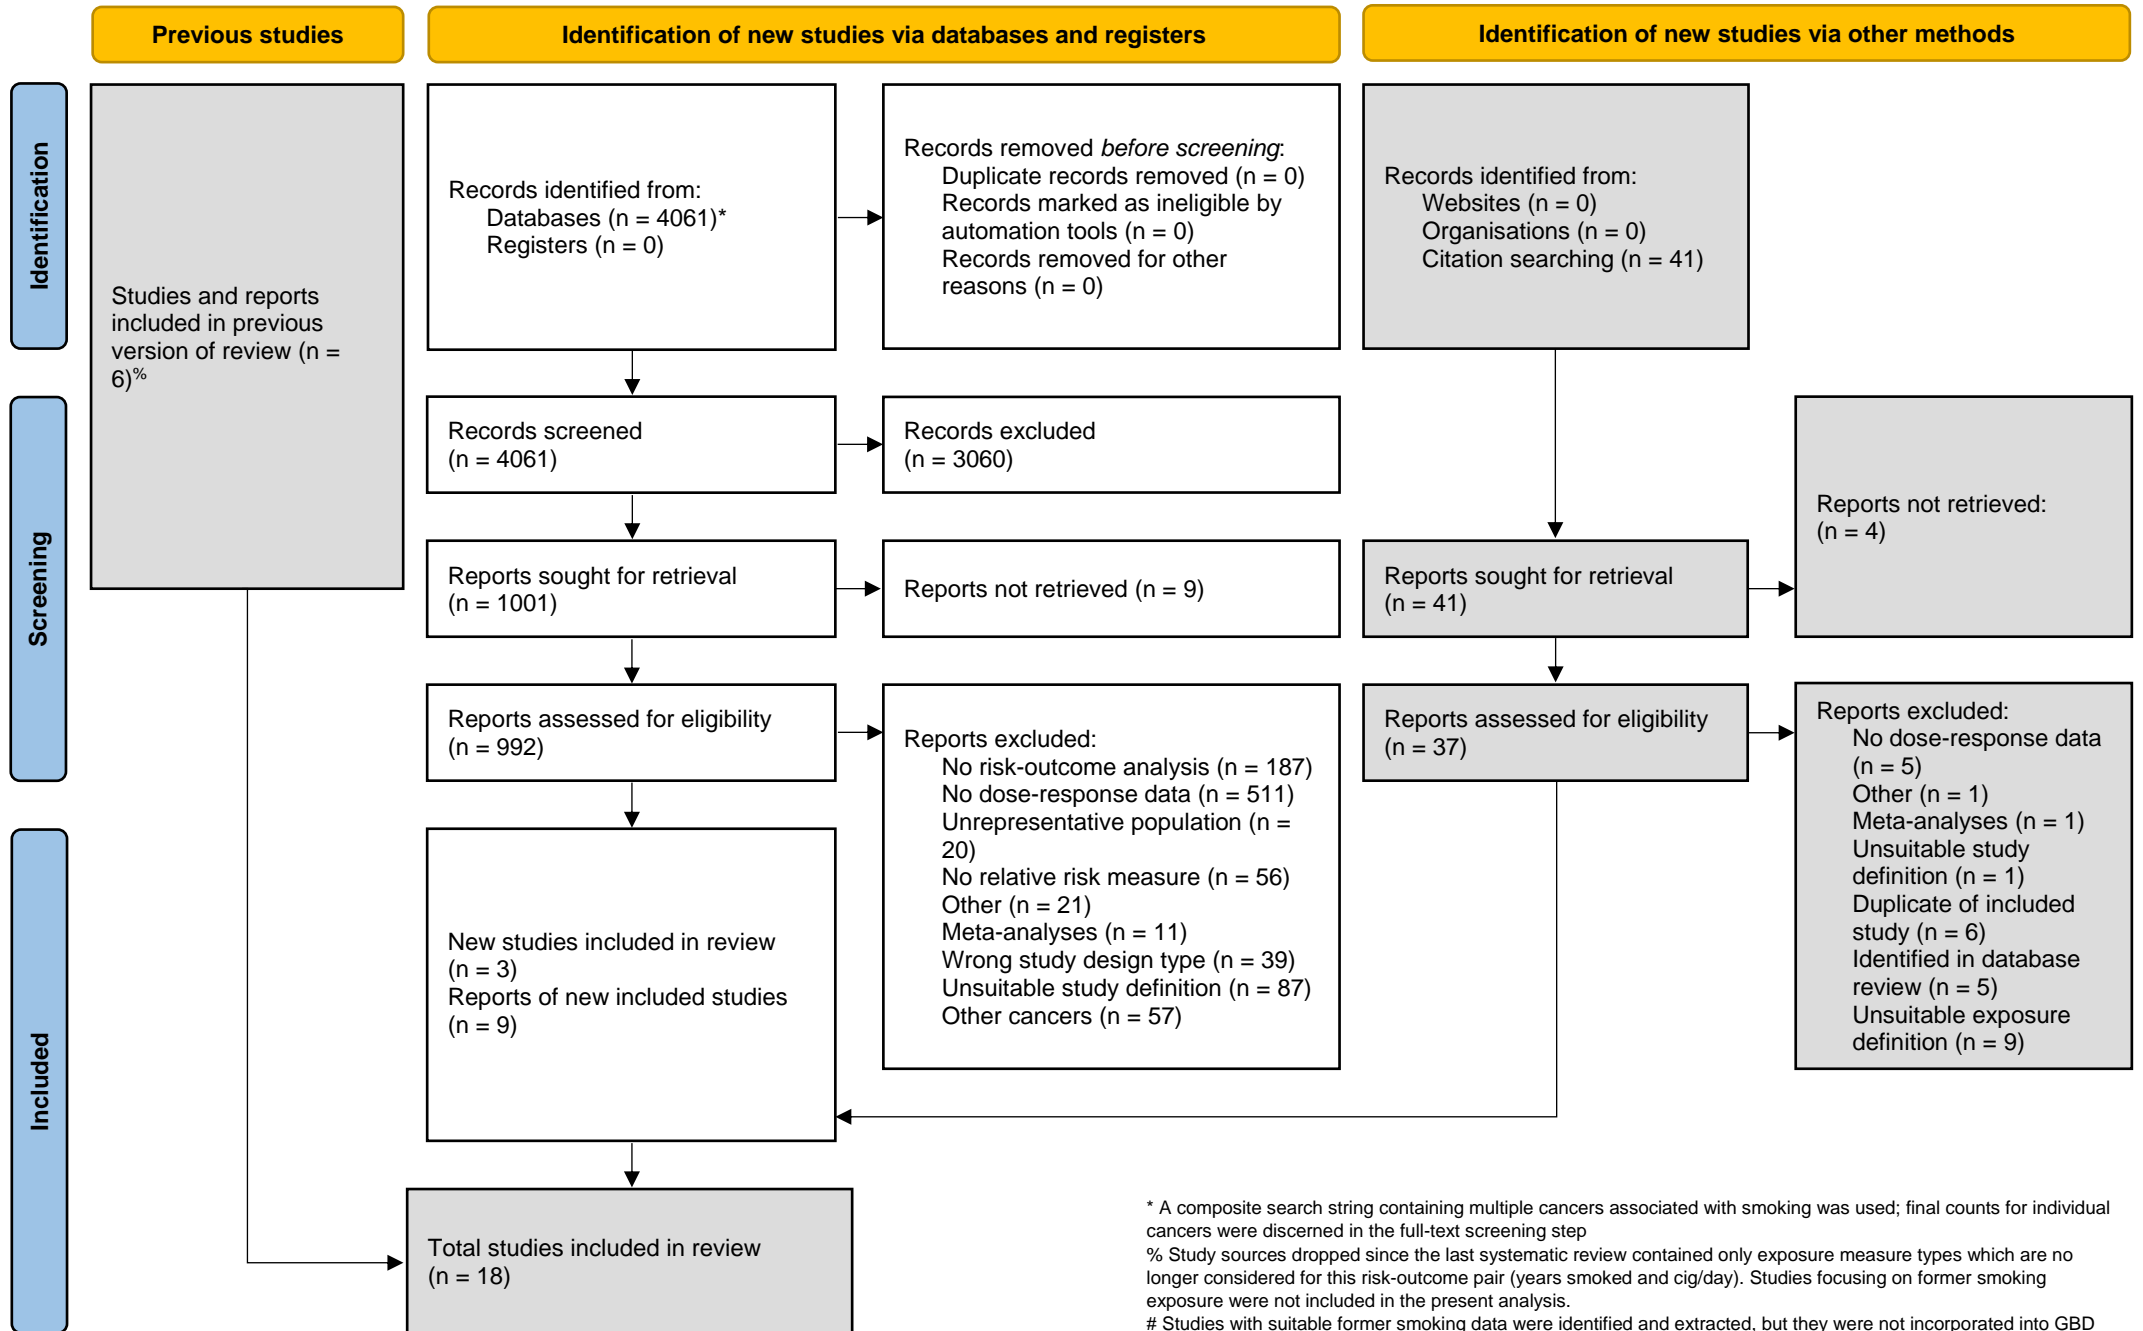

PRISMA 2020 flow diagram for an updated systematic review of the Smoking and Laryngeal cancer risk-outcome pair

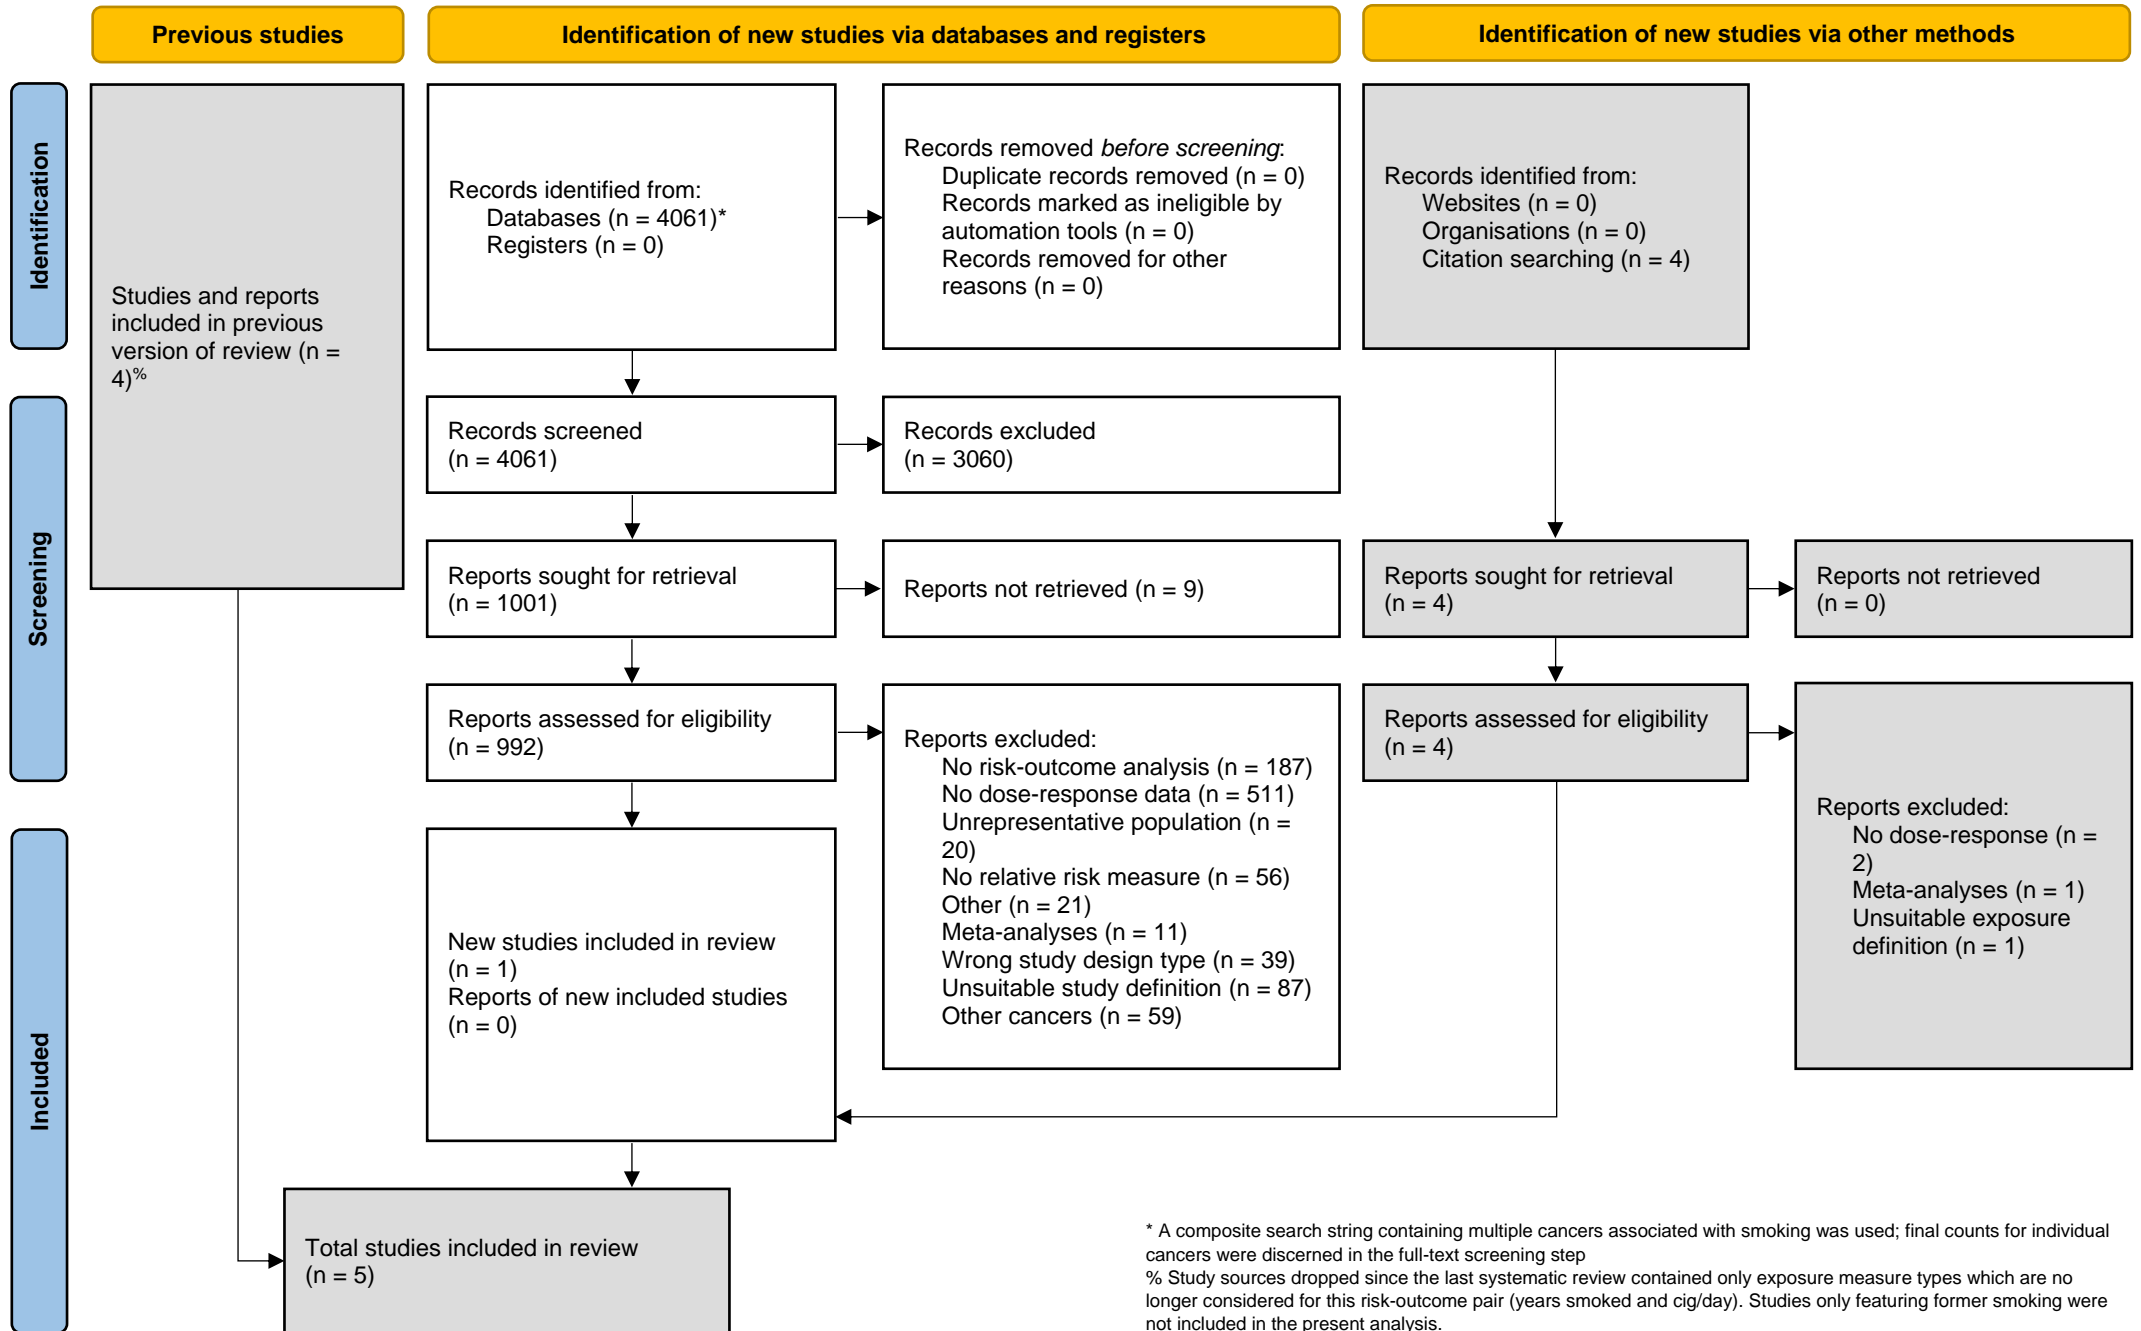

PRISMA 2020 flow diagram for an updated systematic review of the Smoking and Leukemia risk-outcome pair

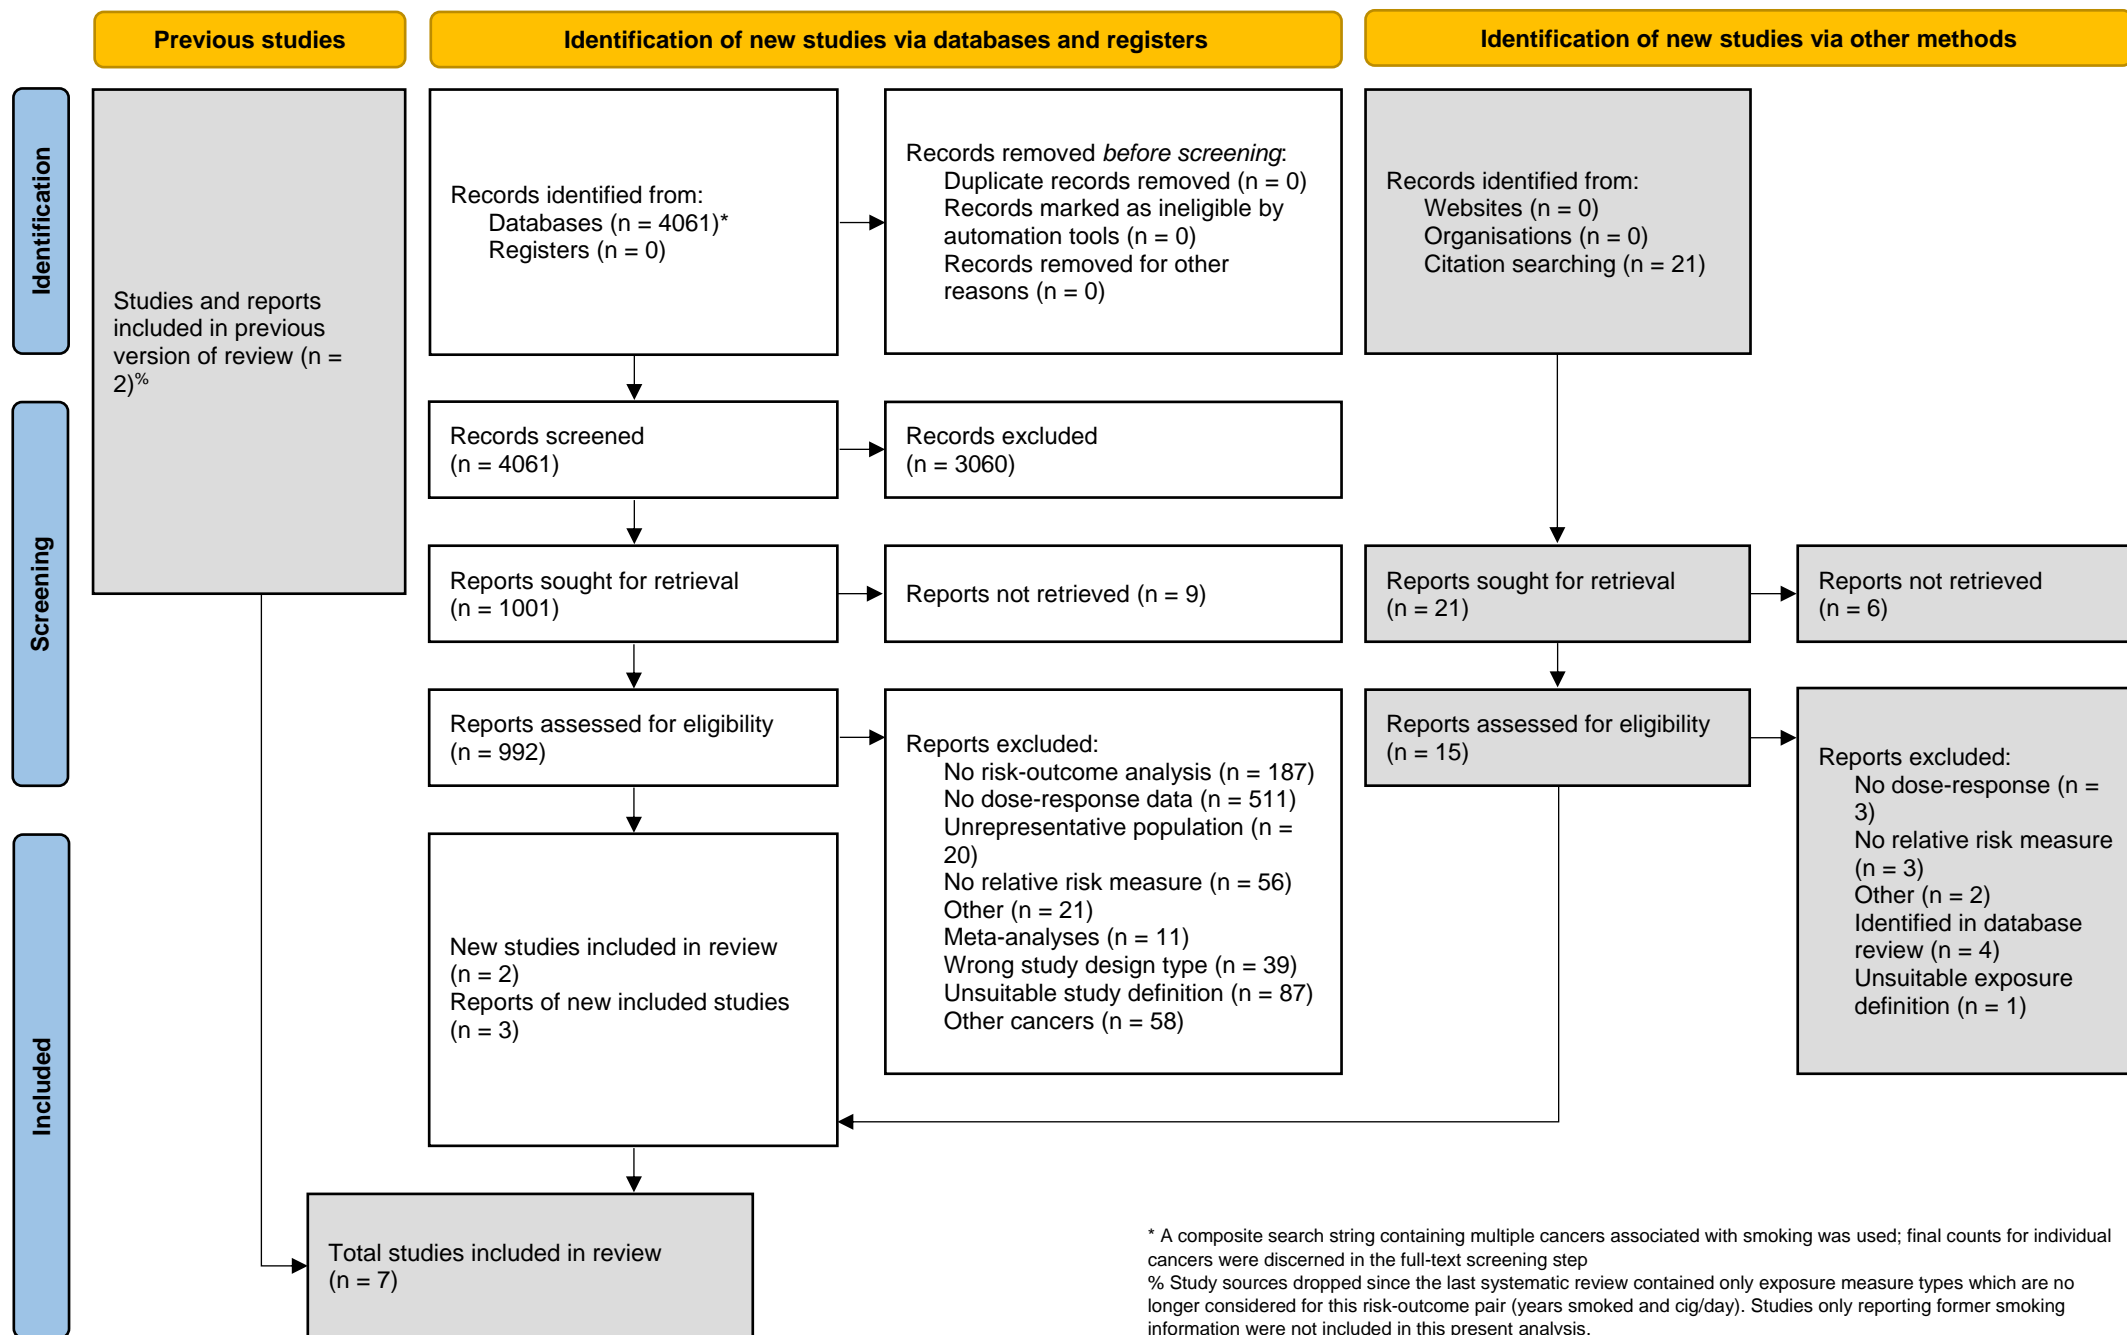

PRISMA 2020 flow diagram for an updated systematic review of the Smoking and Liver cancer risk-outcome pair

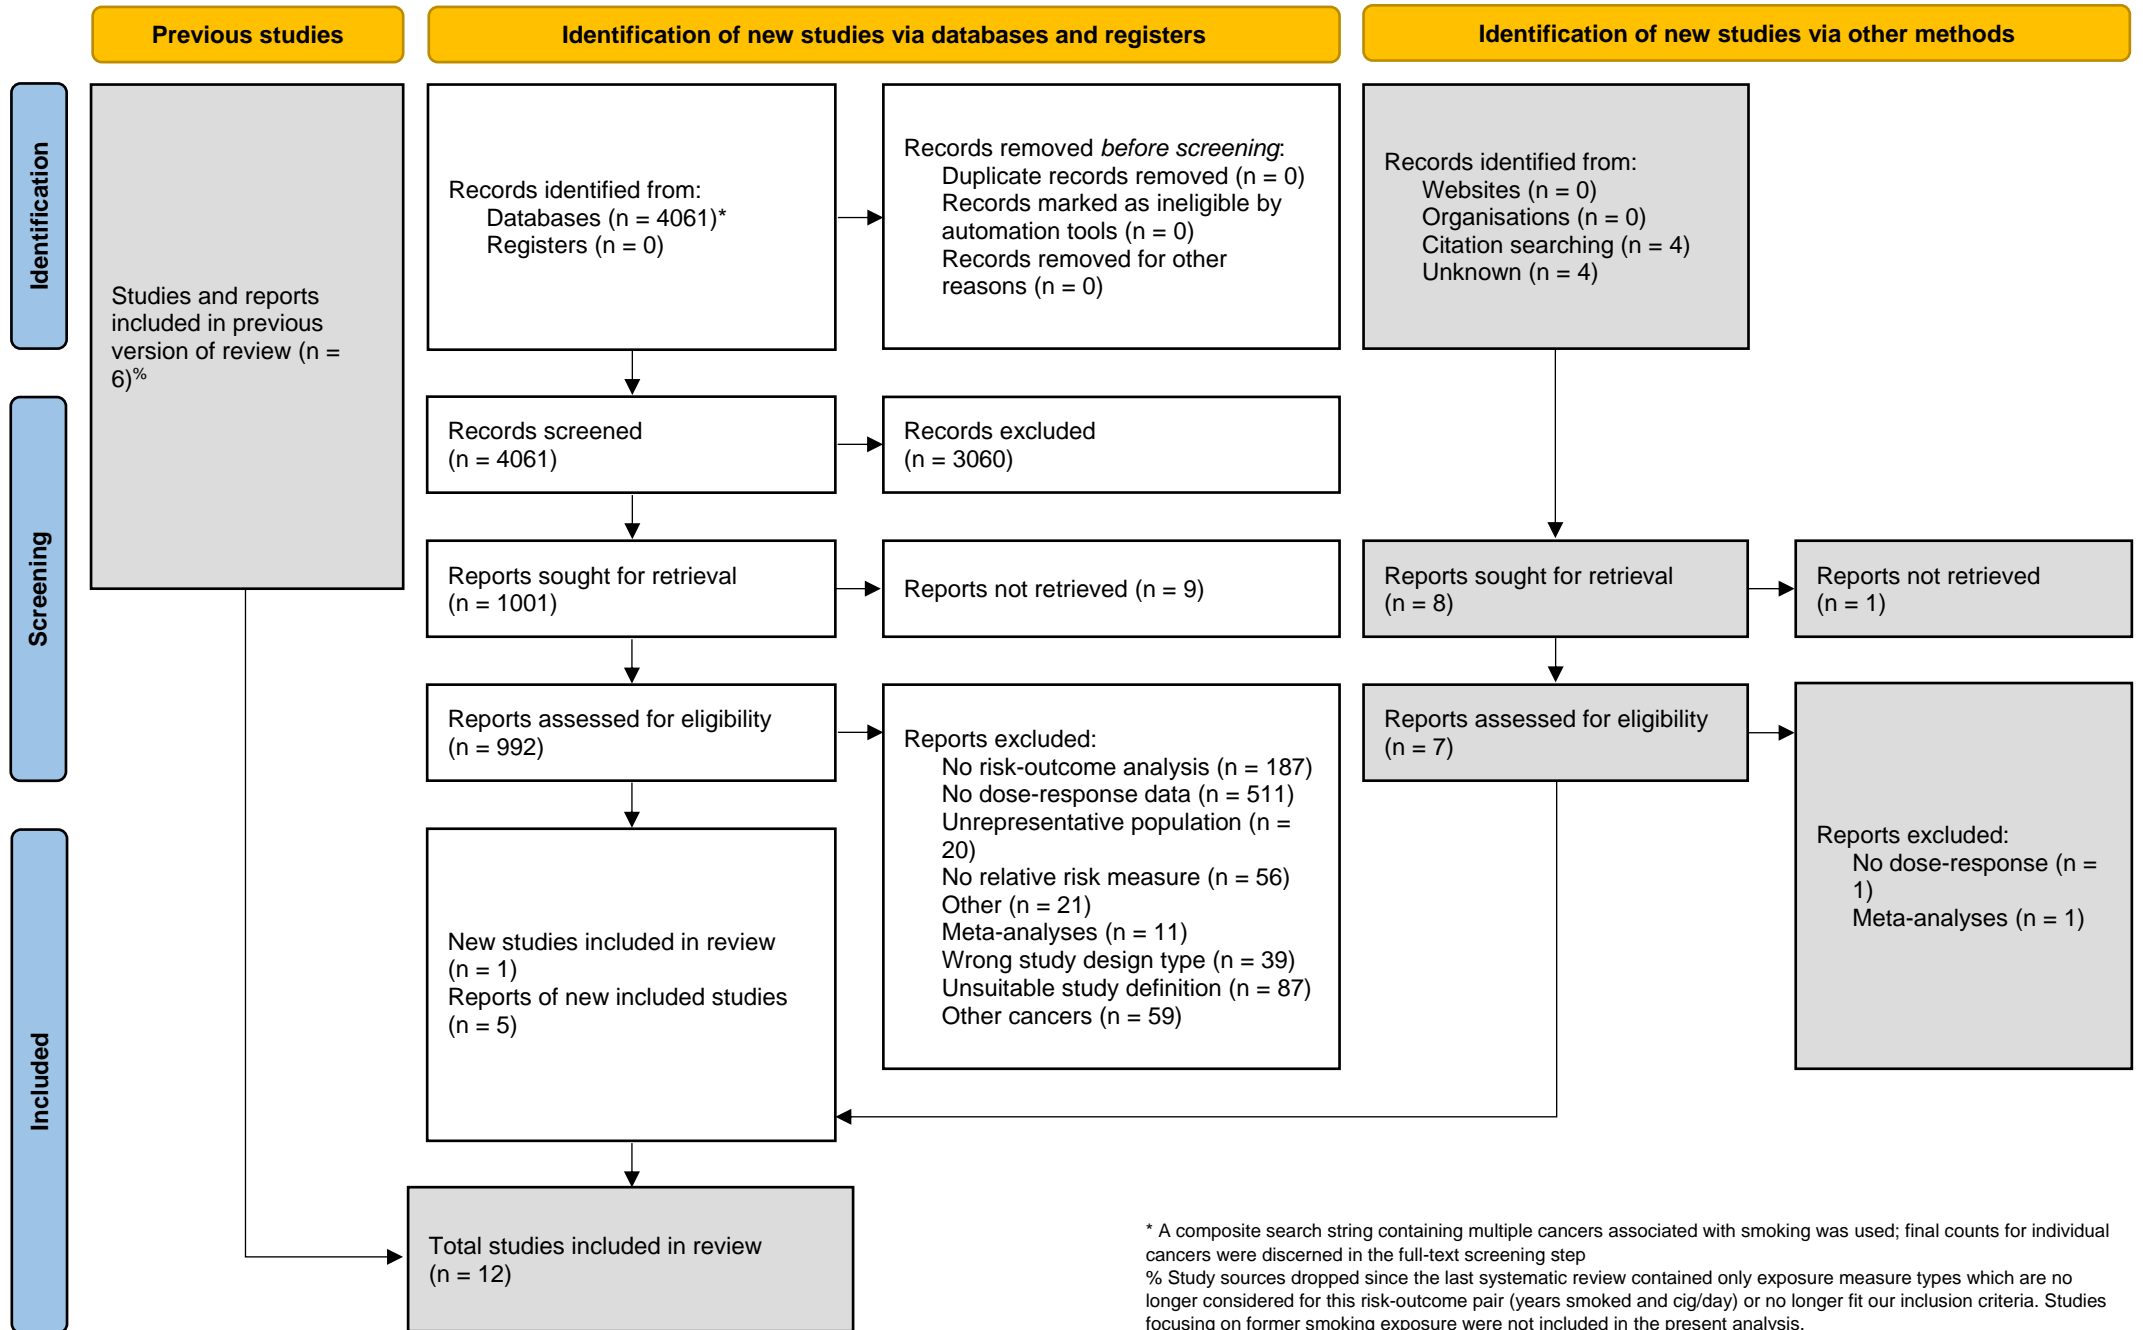



PRISMA 2020 flow diagram for an updated systematic review of the Smoking and Lip and oral cavity cancer risk-outcome pair

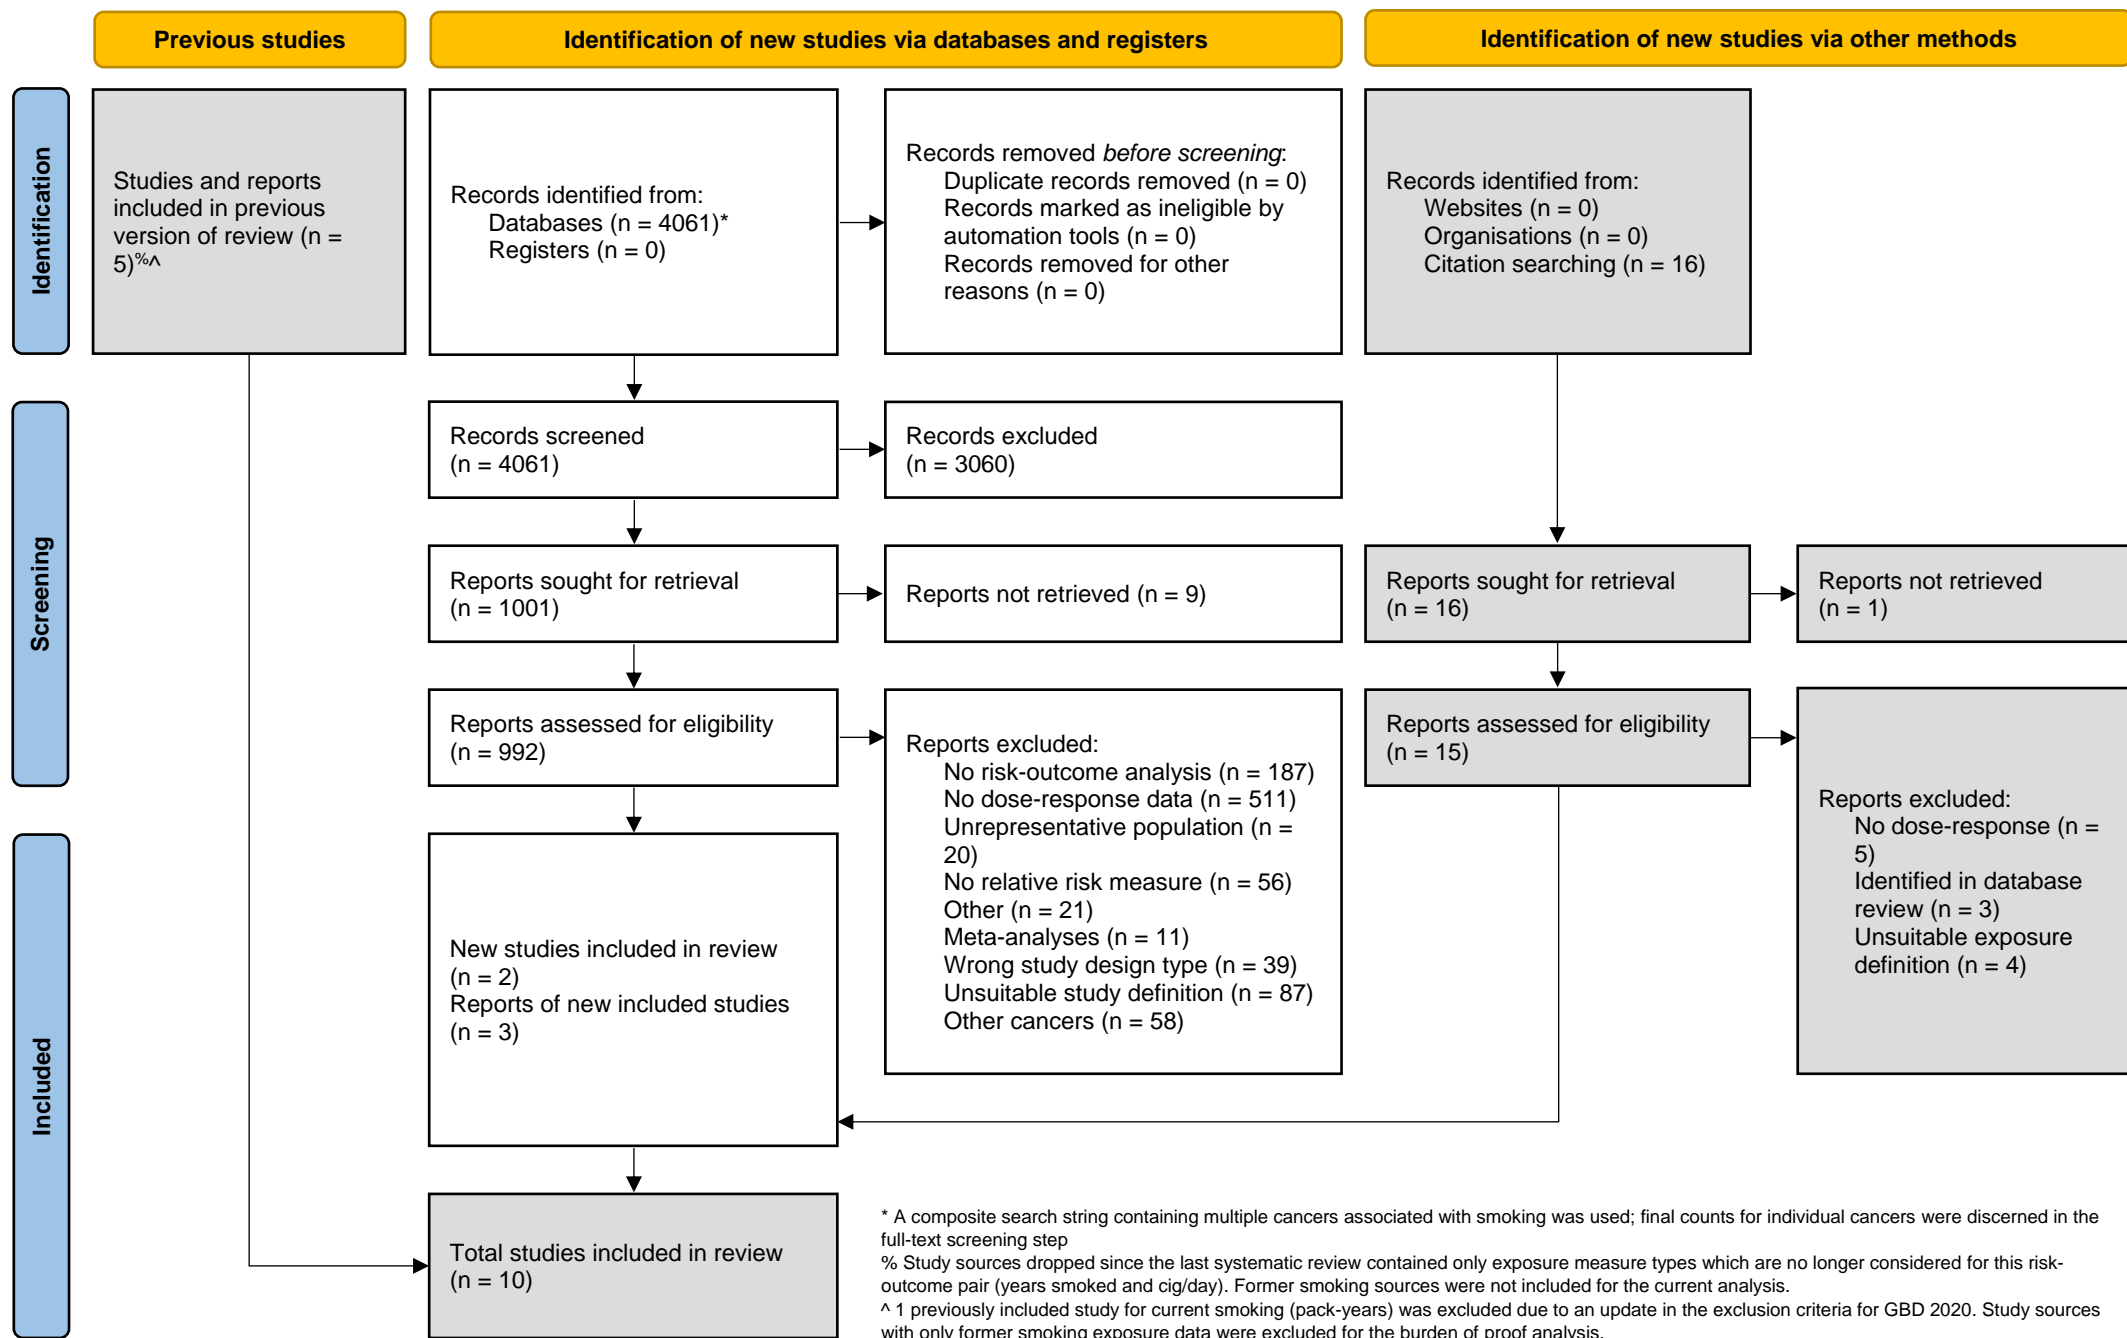

PRISMA 2020 flow diagram for an updated systematic review of the Smoking and Nasopharynx risk-outcome pair

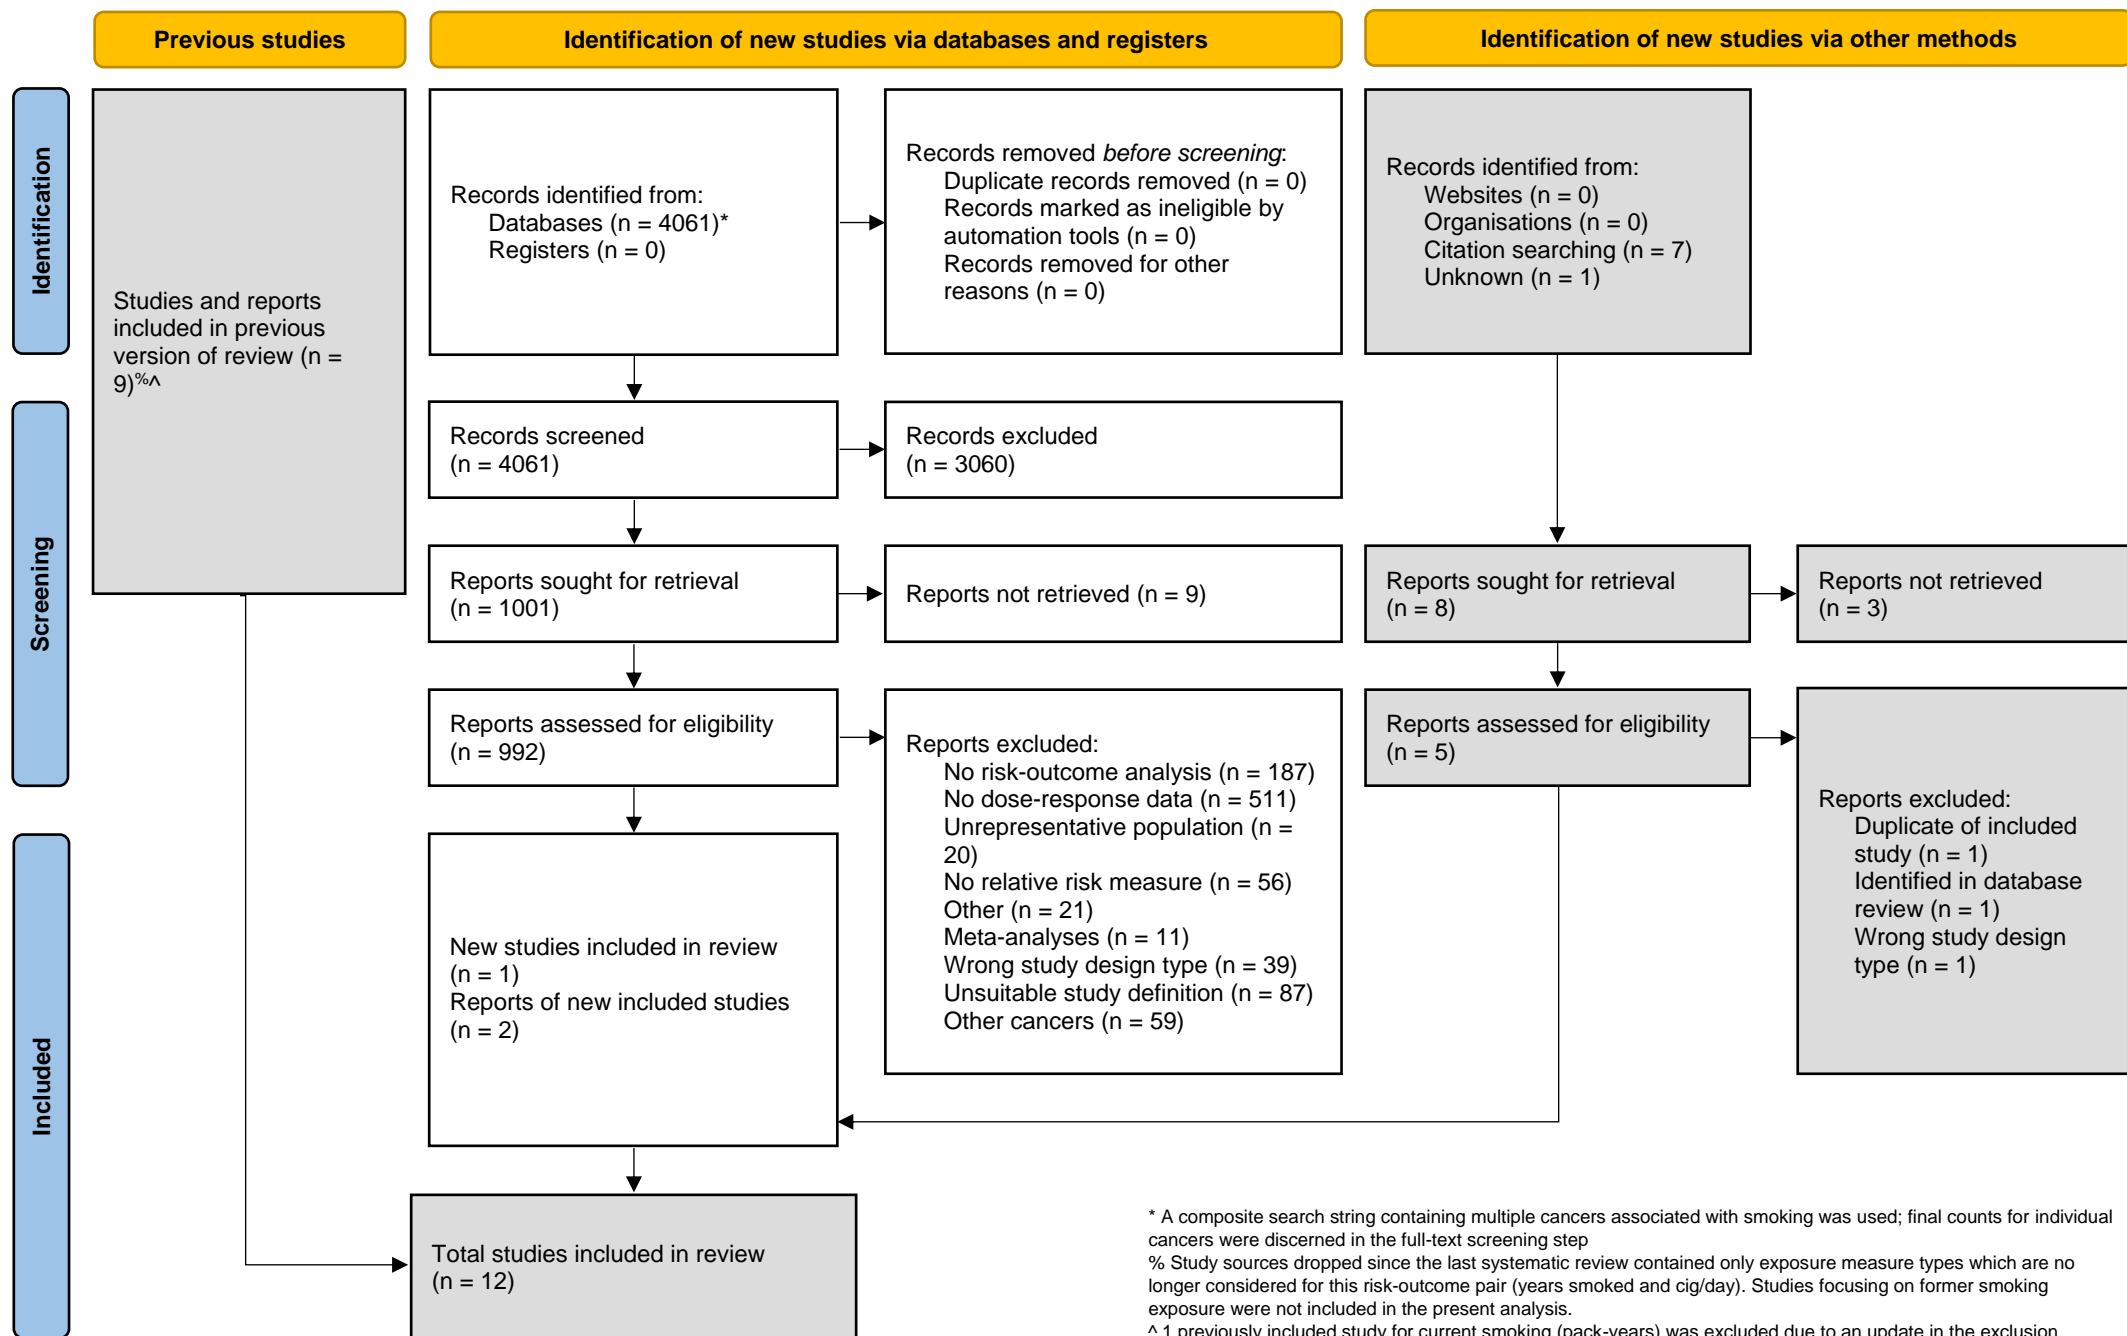

\* A composite search string containing multiple cancers associated with smoking was used; final counts for individual cancers were discerned in the full-text screening step  
 % Study sources dropped since the last systematic review contained only exposure measure types which are no longer considered for this risk-outcome pair (years smoked and cig/day). Studies focusing on former smoking exposure were not included in the present analysis.  
 ^ 1 previously included study for current smoking (pack-years) was excluded due to an update in the exclusion criteria for GBD 2020

PRISMA 2020 flow diagram for an updated systematic review of the Smoking and Other pharynx cancer risk-outcome pair

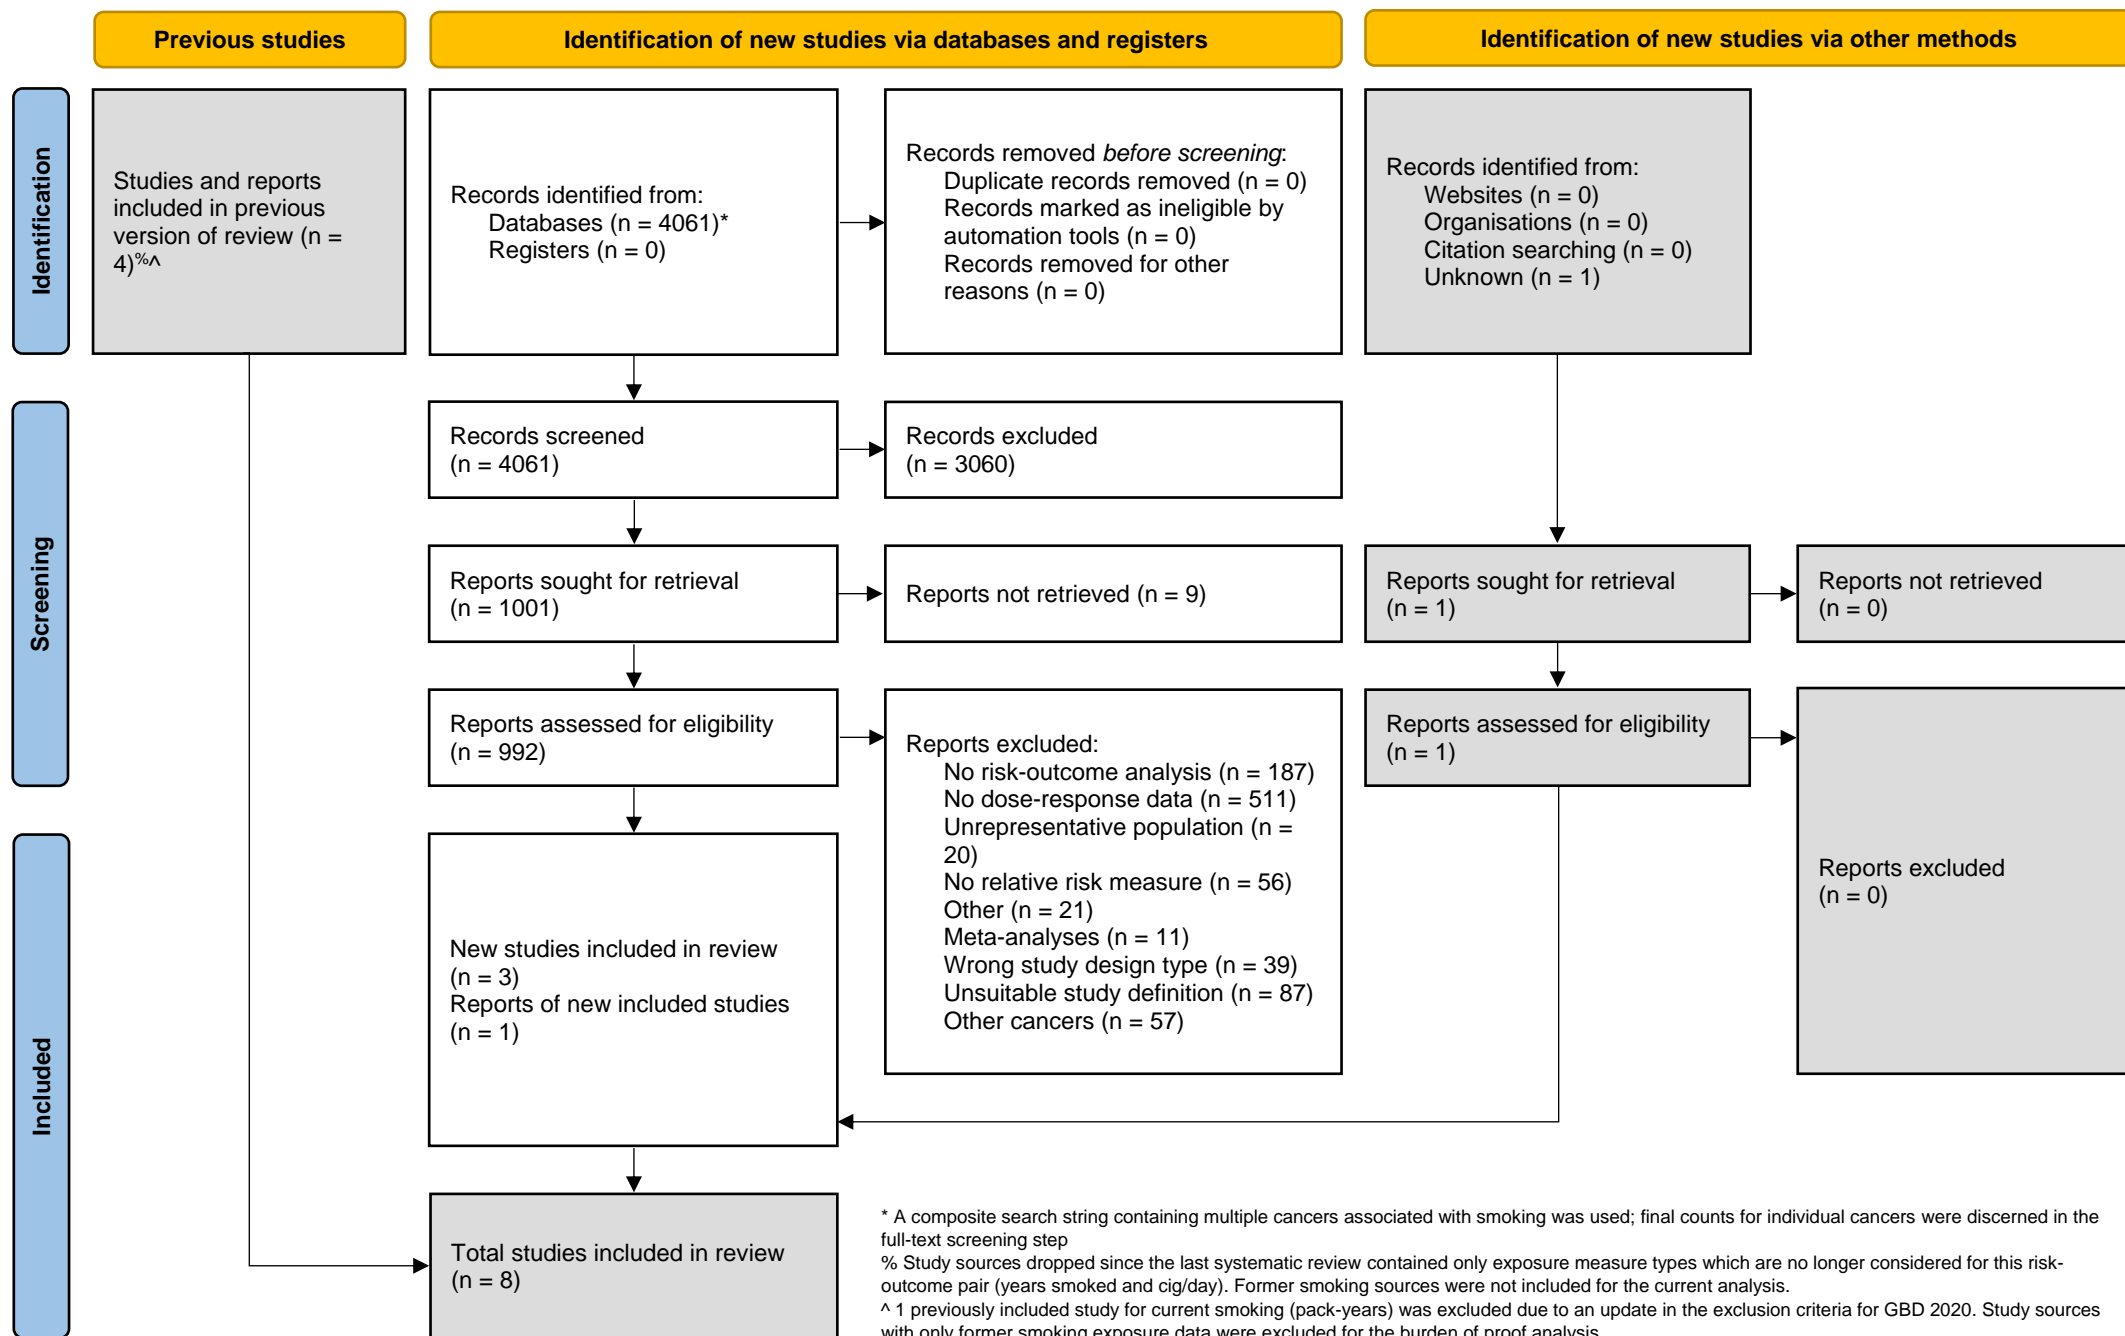

PRISMA 2020 flow diagram for an updated systematic review of the Smoking and Pancreatic cancer risk-outcome pair

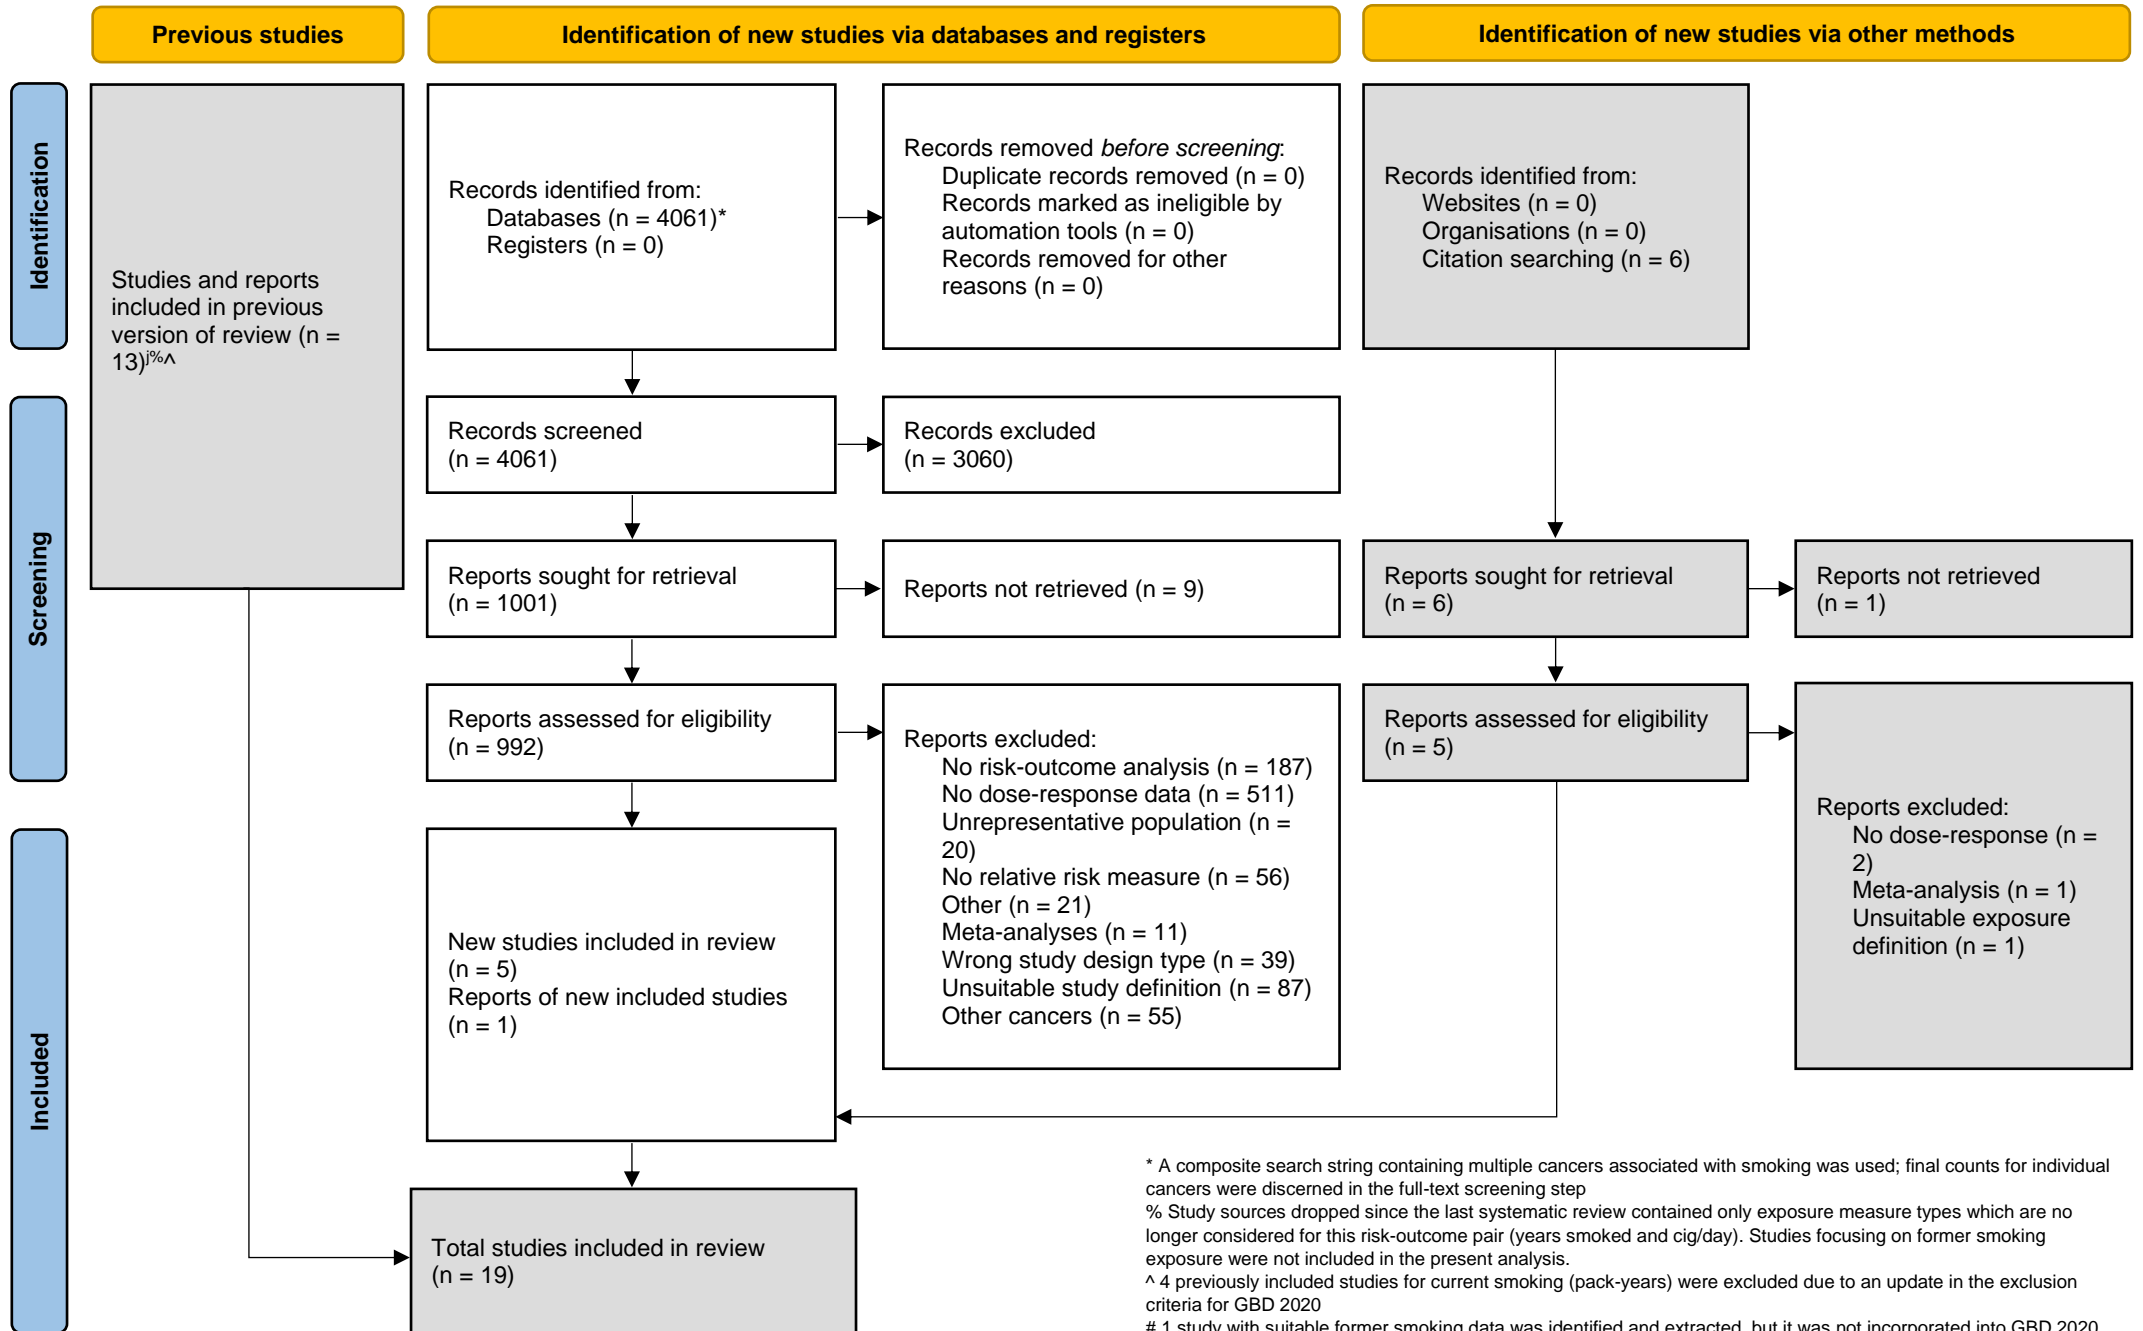

\* A composite search string containing multiple cancers associated with smoking was used; final counts for individual cancers were discerned in the full-text screening step  
 % Study sources dropped since the last systematic review contained only exposure measure types which are no longer considered for this risk-outcome pair (years smoked and cig/day). Studies focusing on former smoking exposure were not included in the present analysis.  
 ^ 4 previously included studies for current smoking (pack-years) were excluded due to an update in the exclusion criteria for GBD 2020  
 # 1 study with suitable former smoking data was identified and extracted, but it was not incorporated into GBD 2020 results

PRISMA 2020 flow diagram for an updated systematic review of the Smoking and Stomach cancer risk-outcome pair

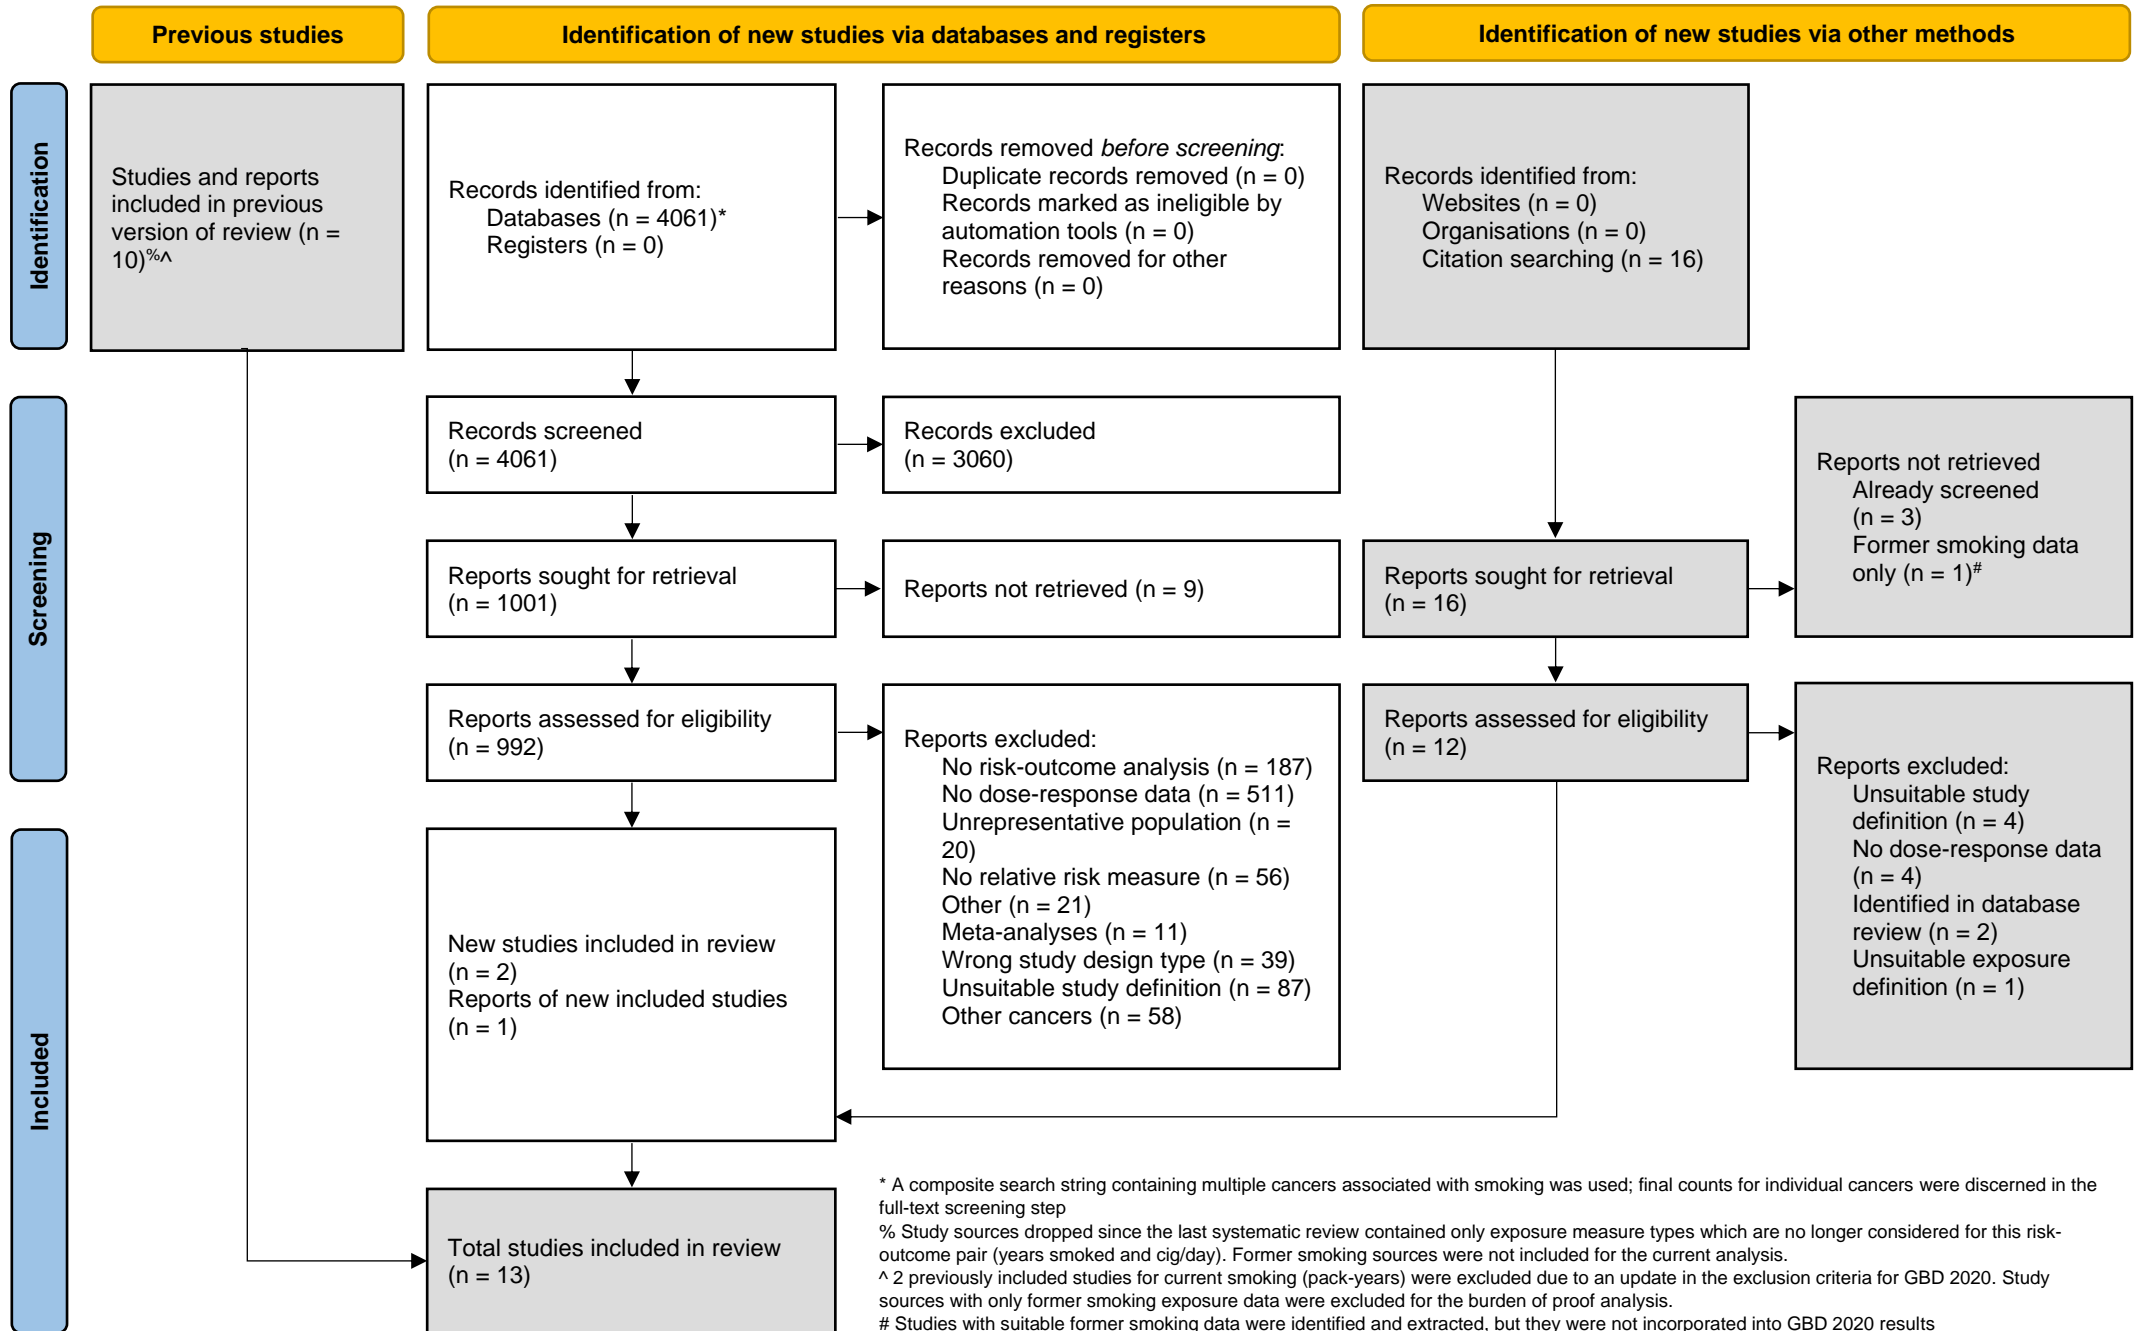

PRISMA 2020 flow diagram for an updated systematic review of the Smoking and Alzheimer's disease and other dementias risk-outcome pair

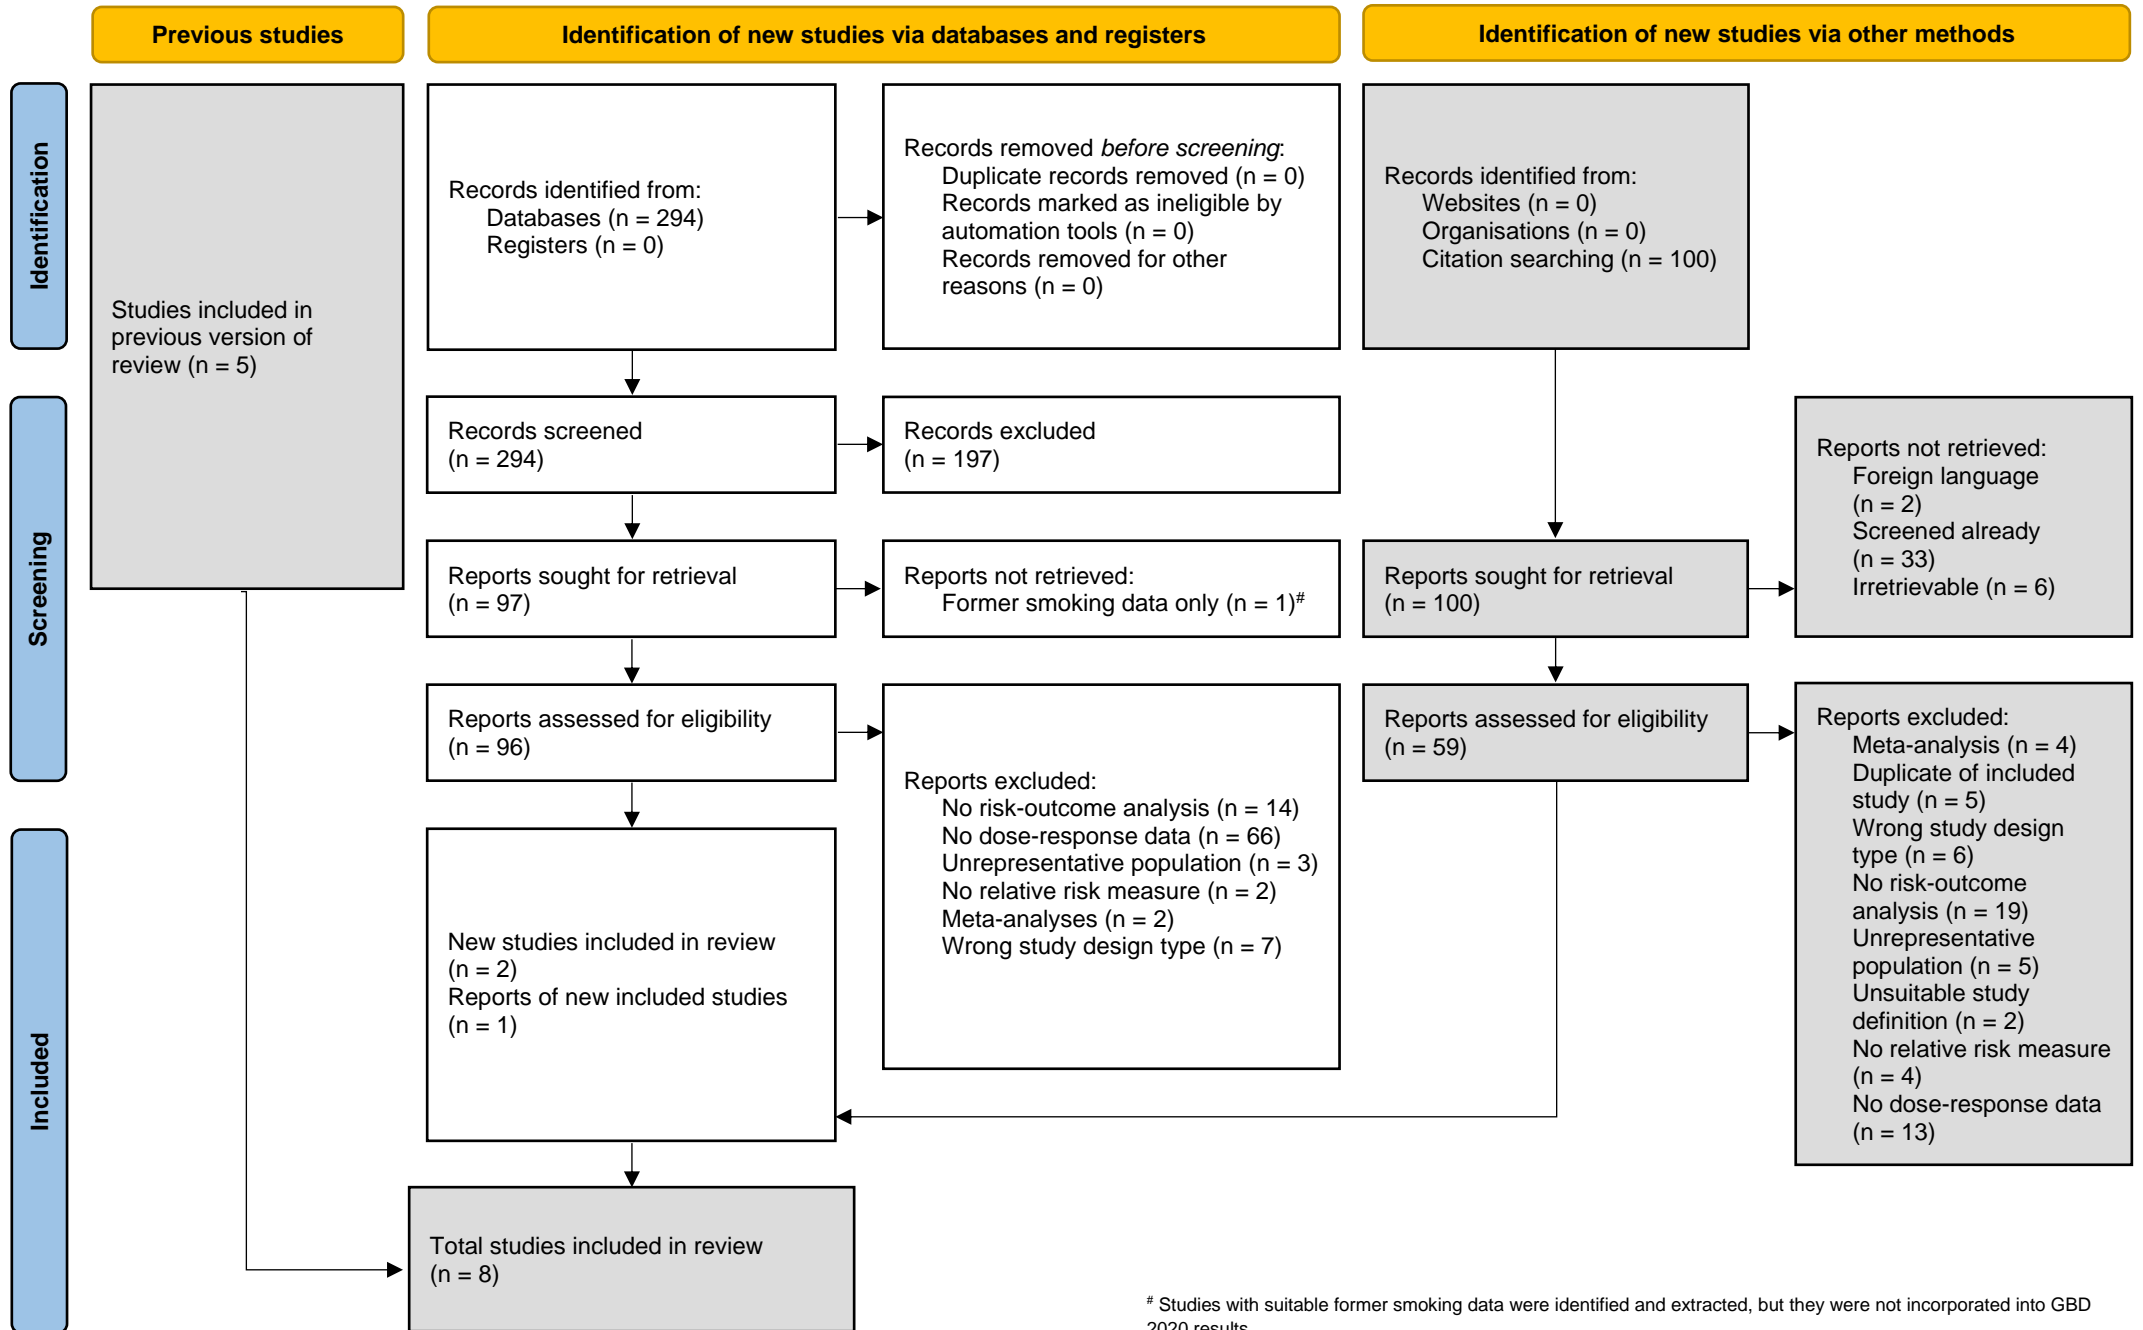

PRISMA 2020 flow diagram for an updated systematic review of the Smoking and Multiple sclerosis risk-outcome pair

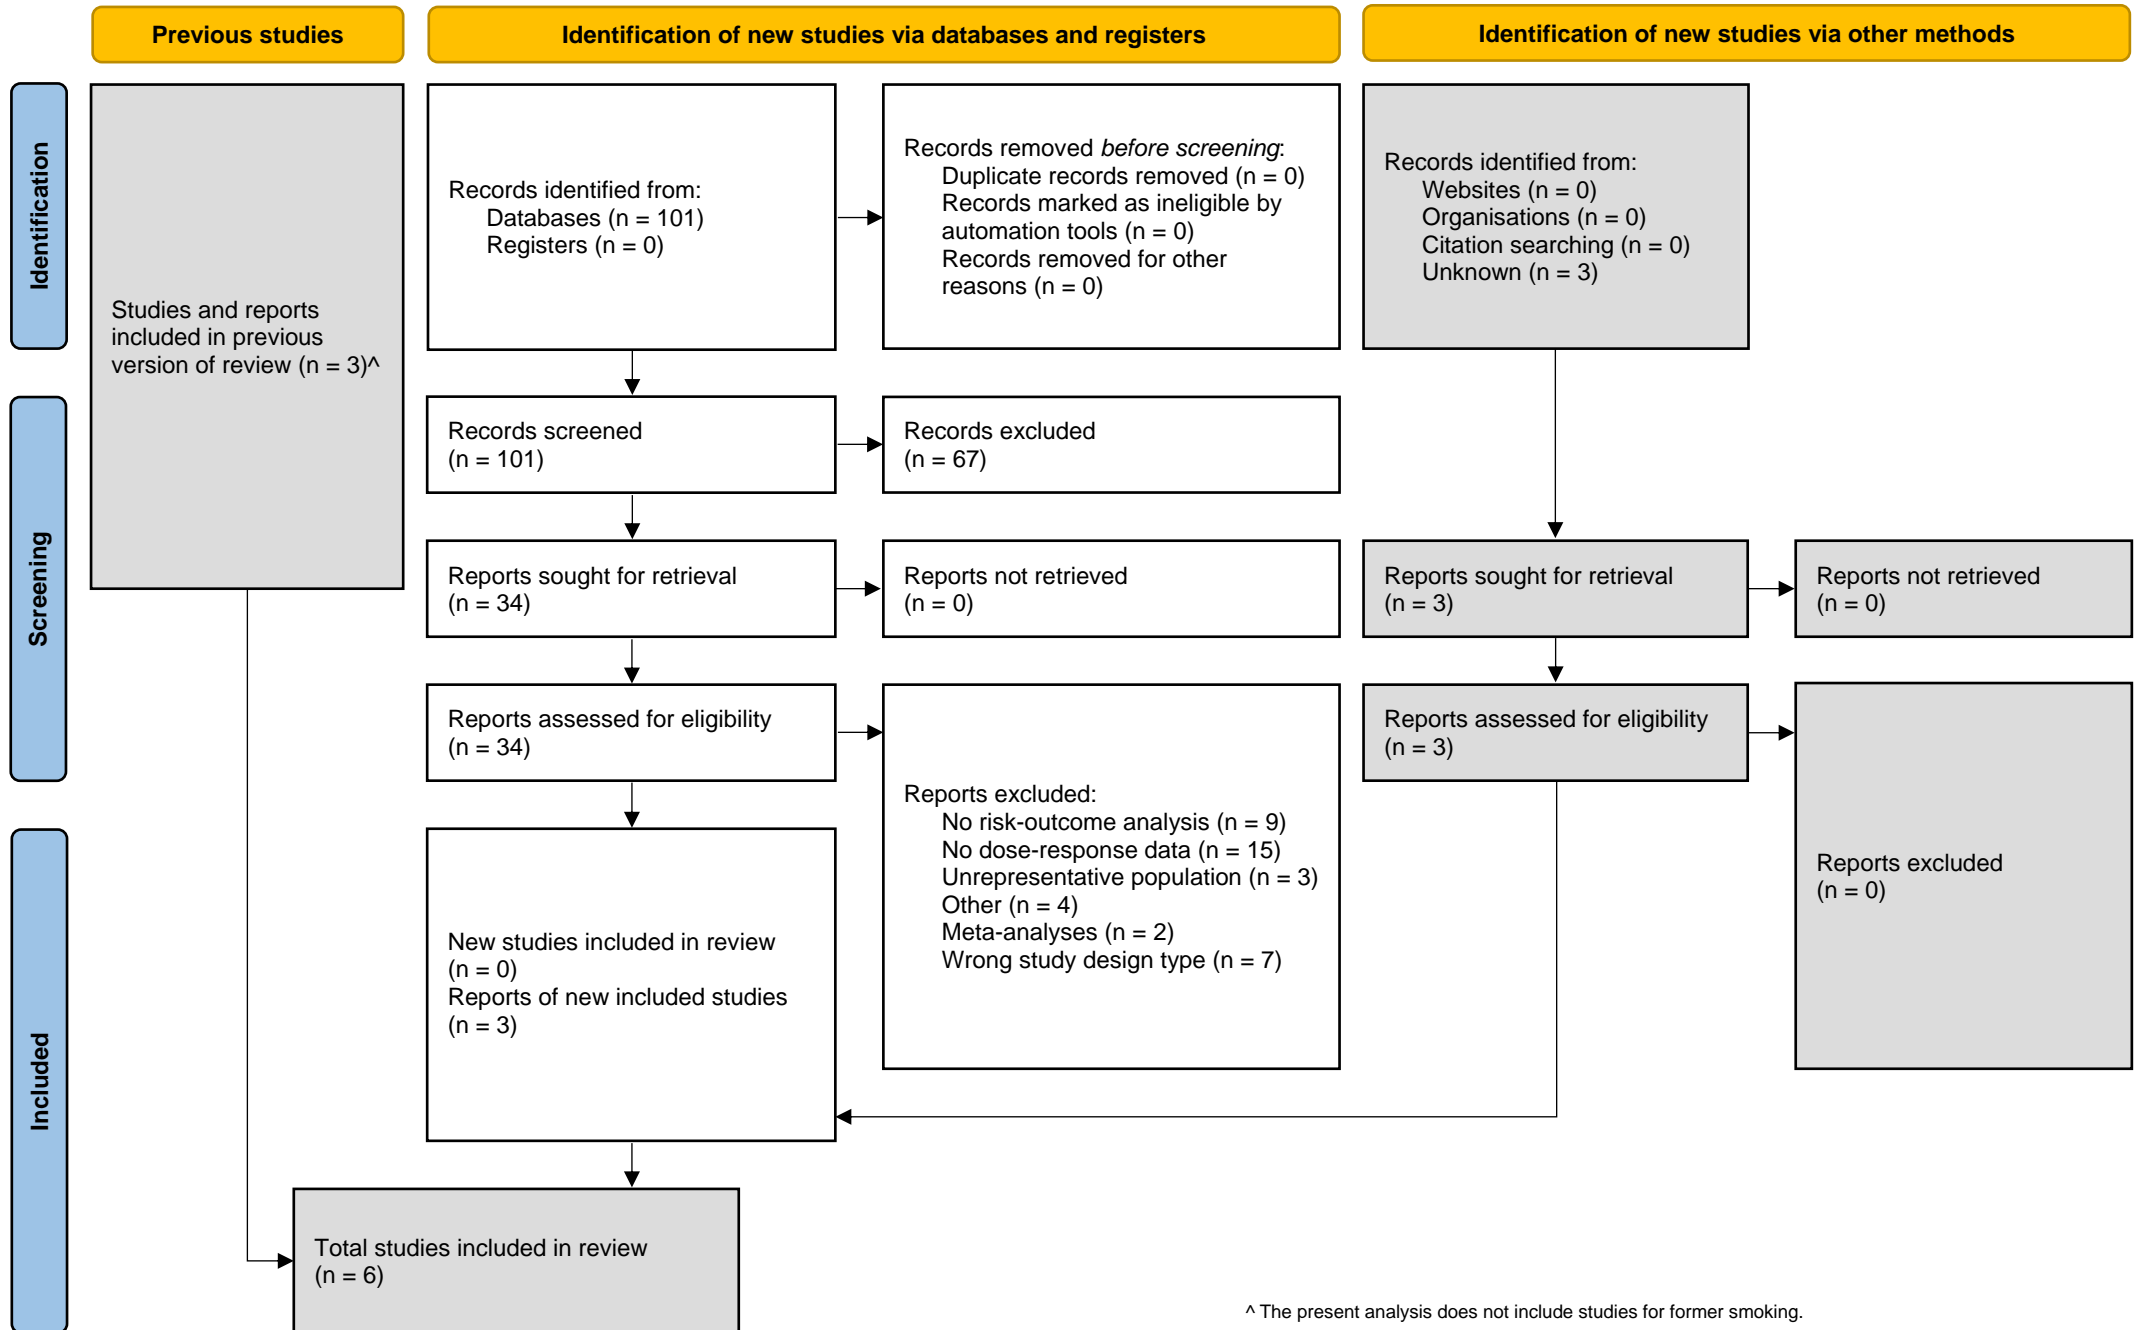

PRISMA 2020 flow diagram for an updated systematic review of the Smoking and Parkinson's disease risk-outcome pair

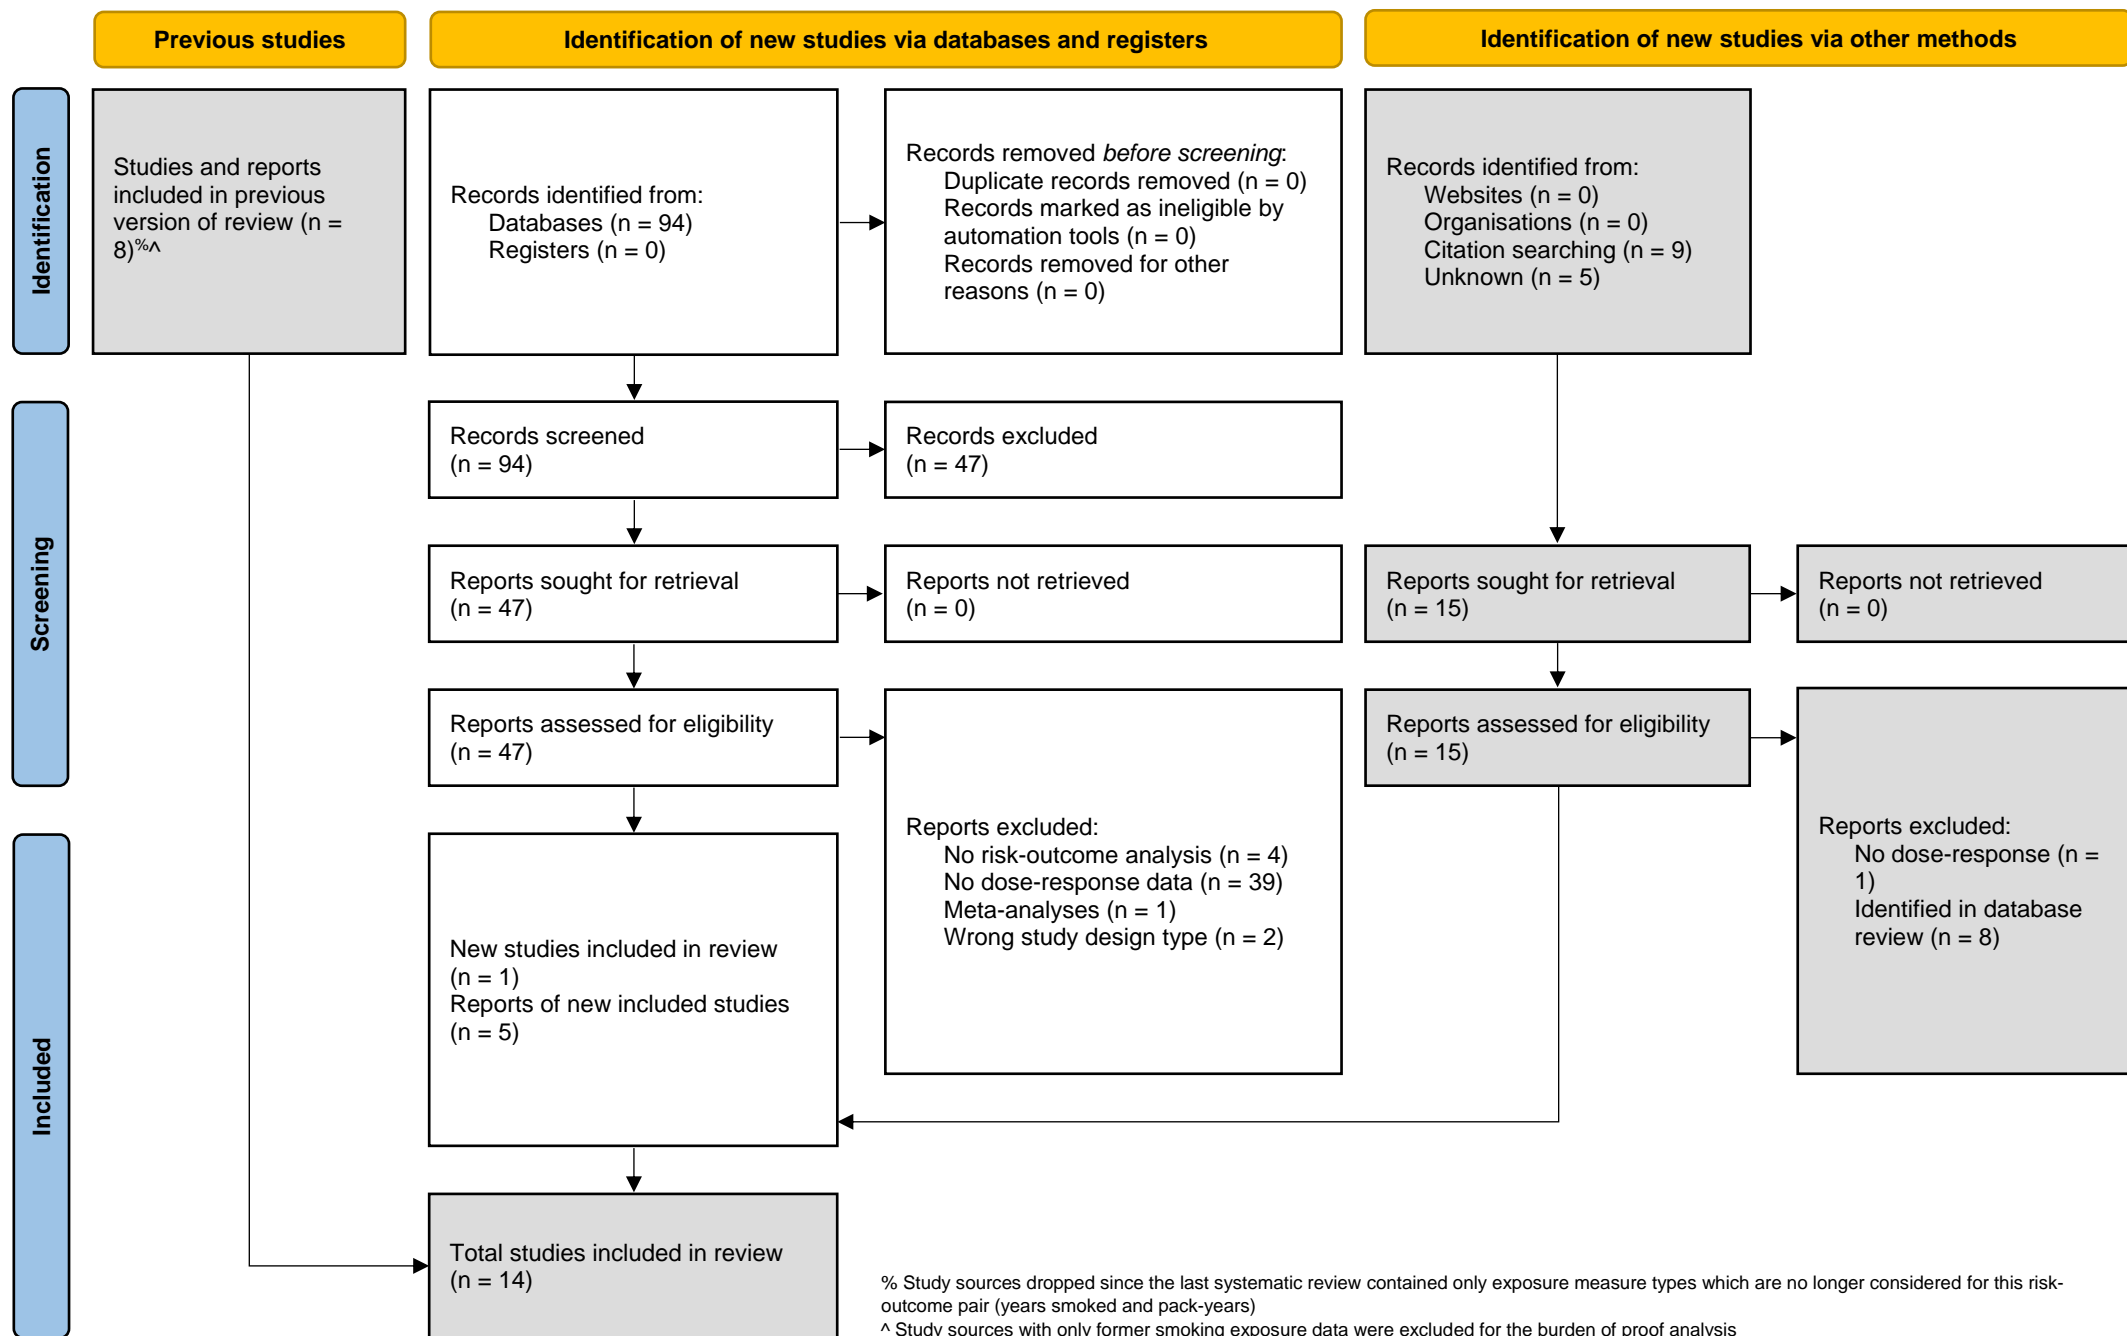



PRISMA 2020 flow diagram for an updated systematic review of the Smoking and Asthma risk-outcome pair

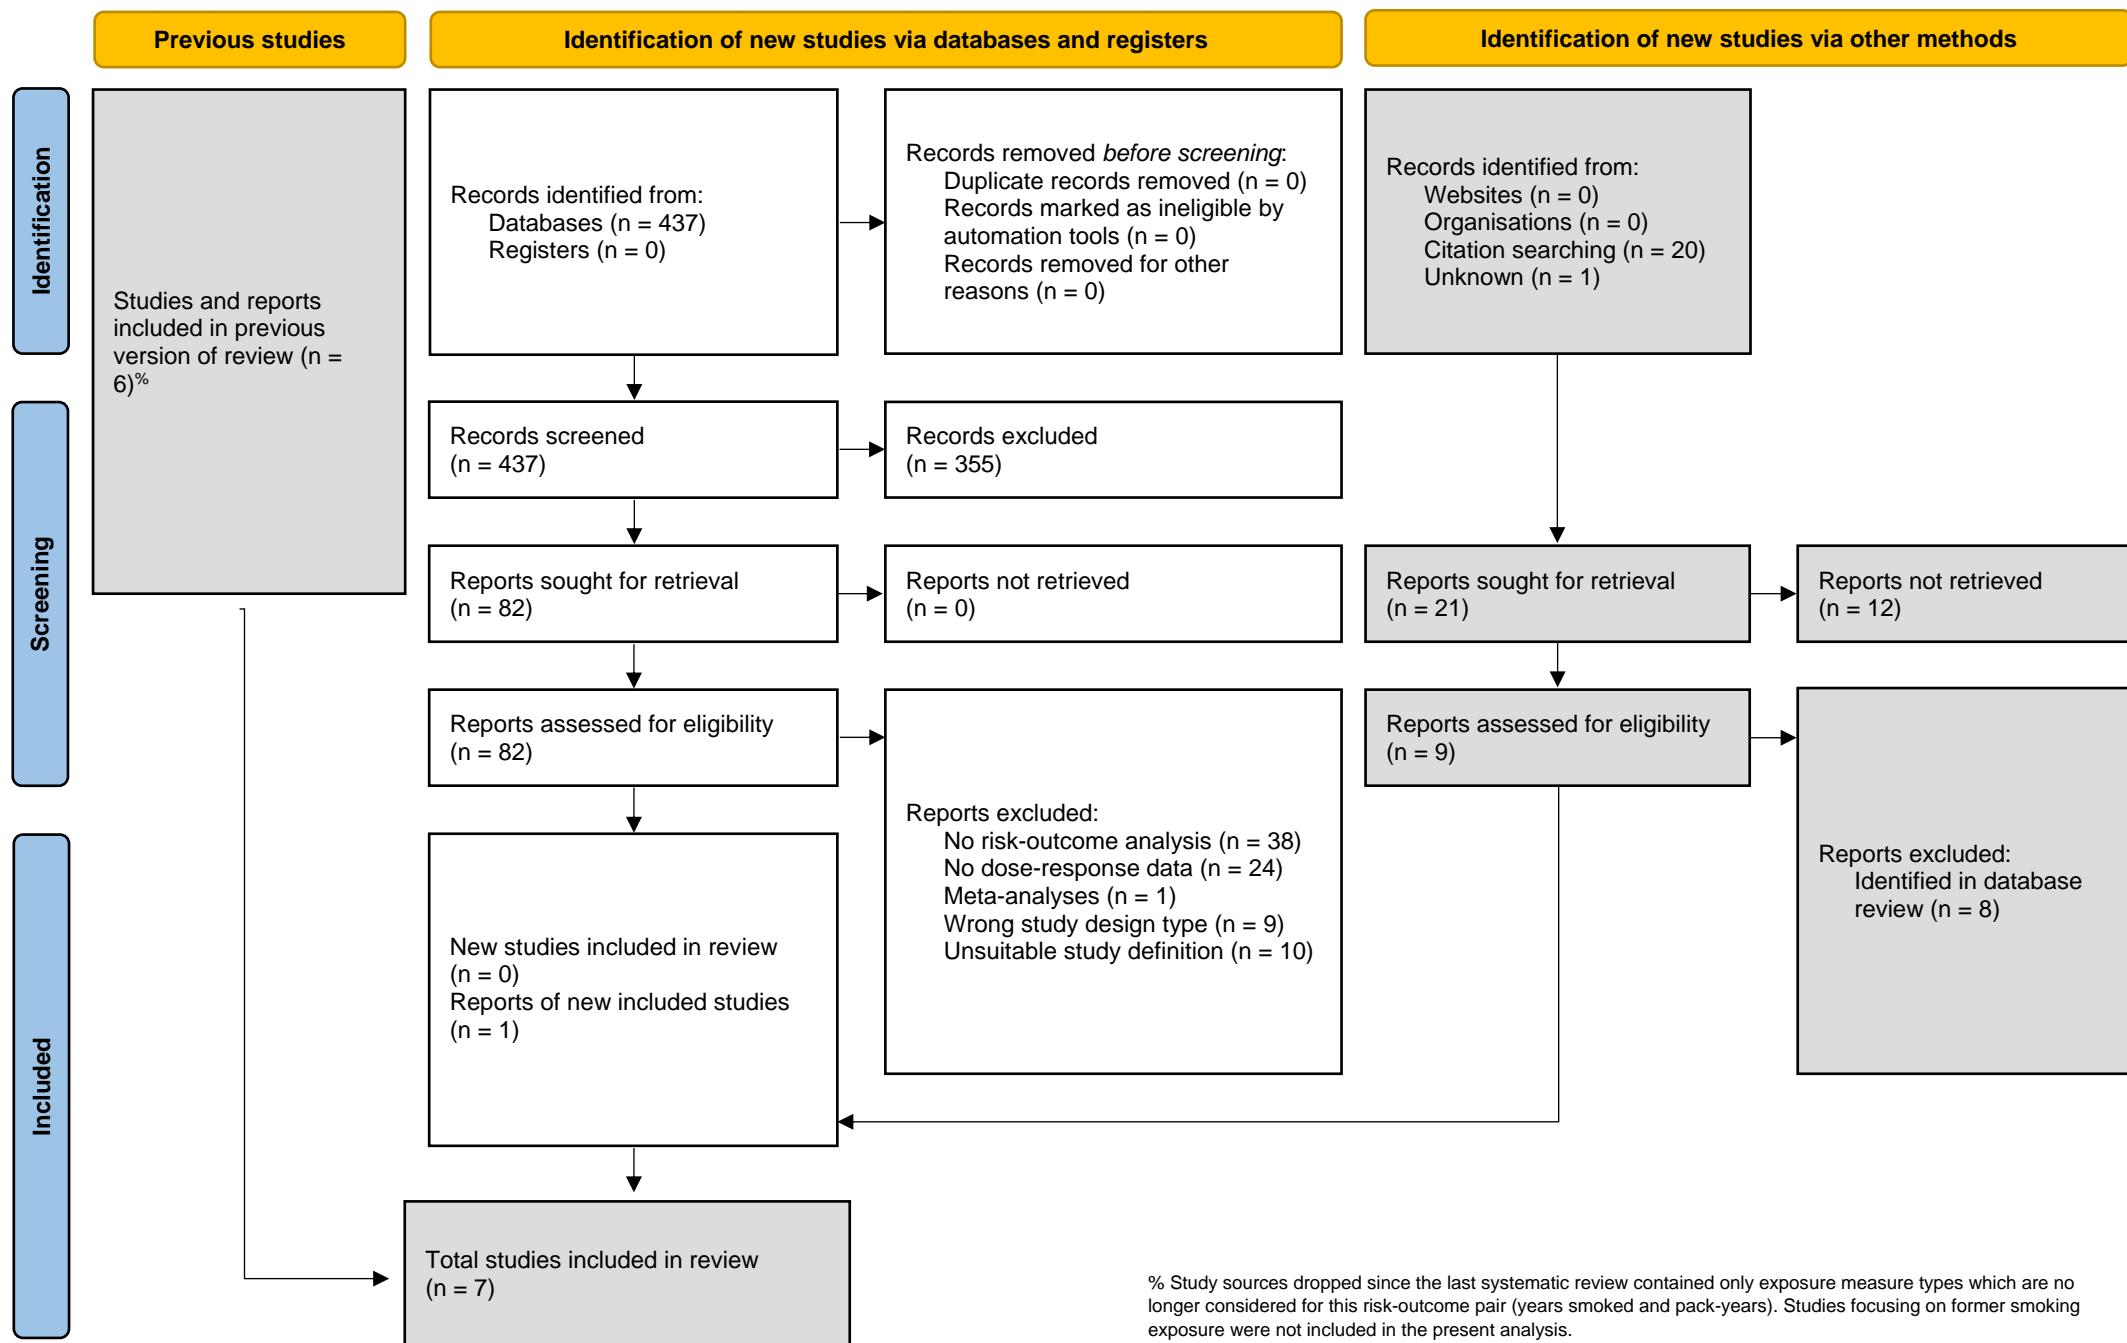

PRISMA 2020 flow diagram for an updated systematic review of the Smoking and Cataract risk-outcome pair

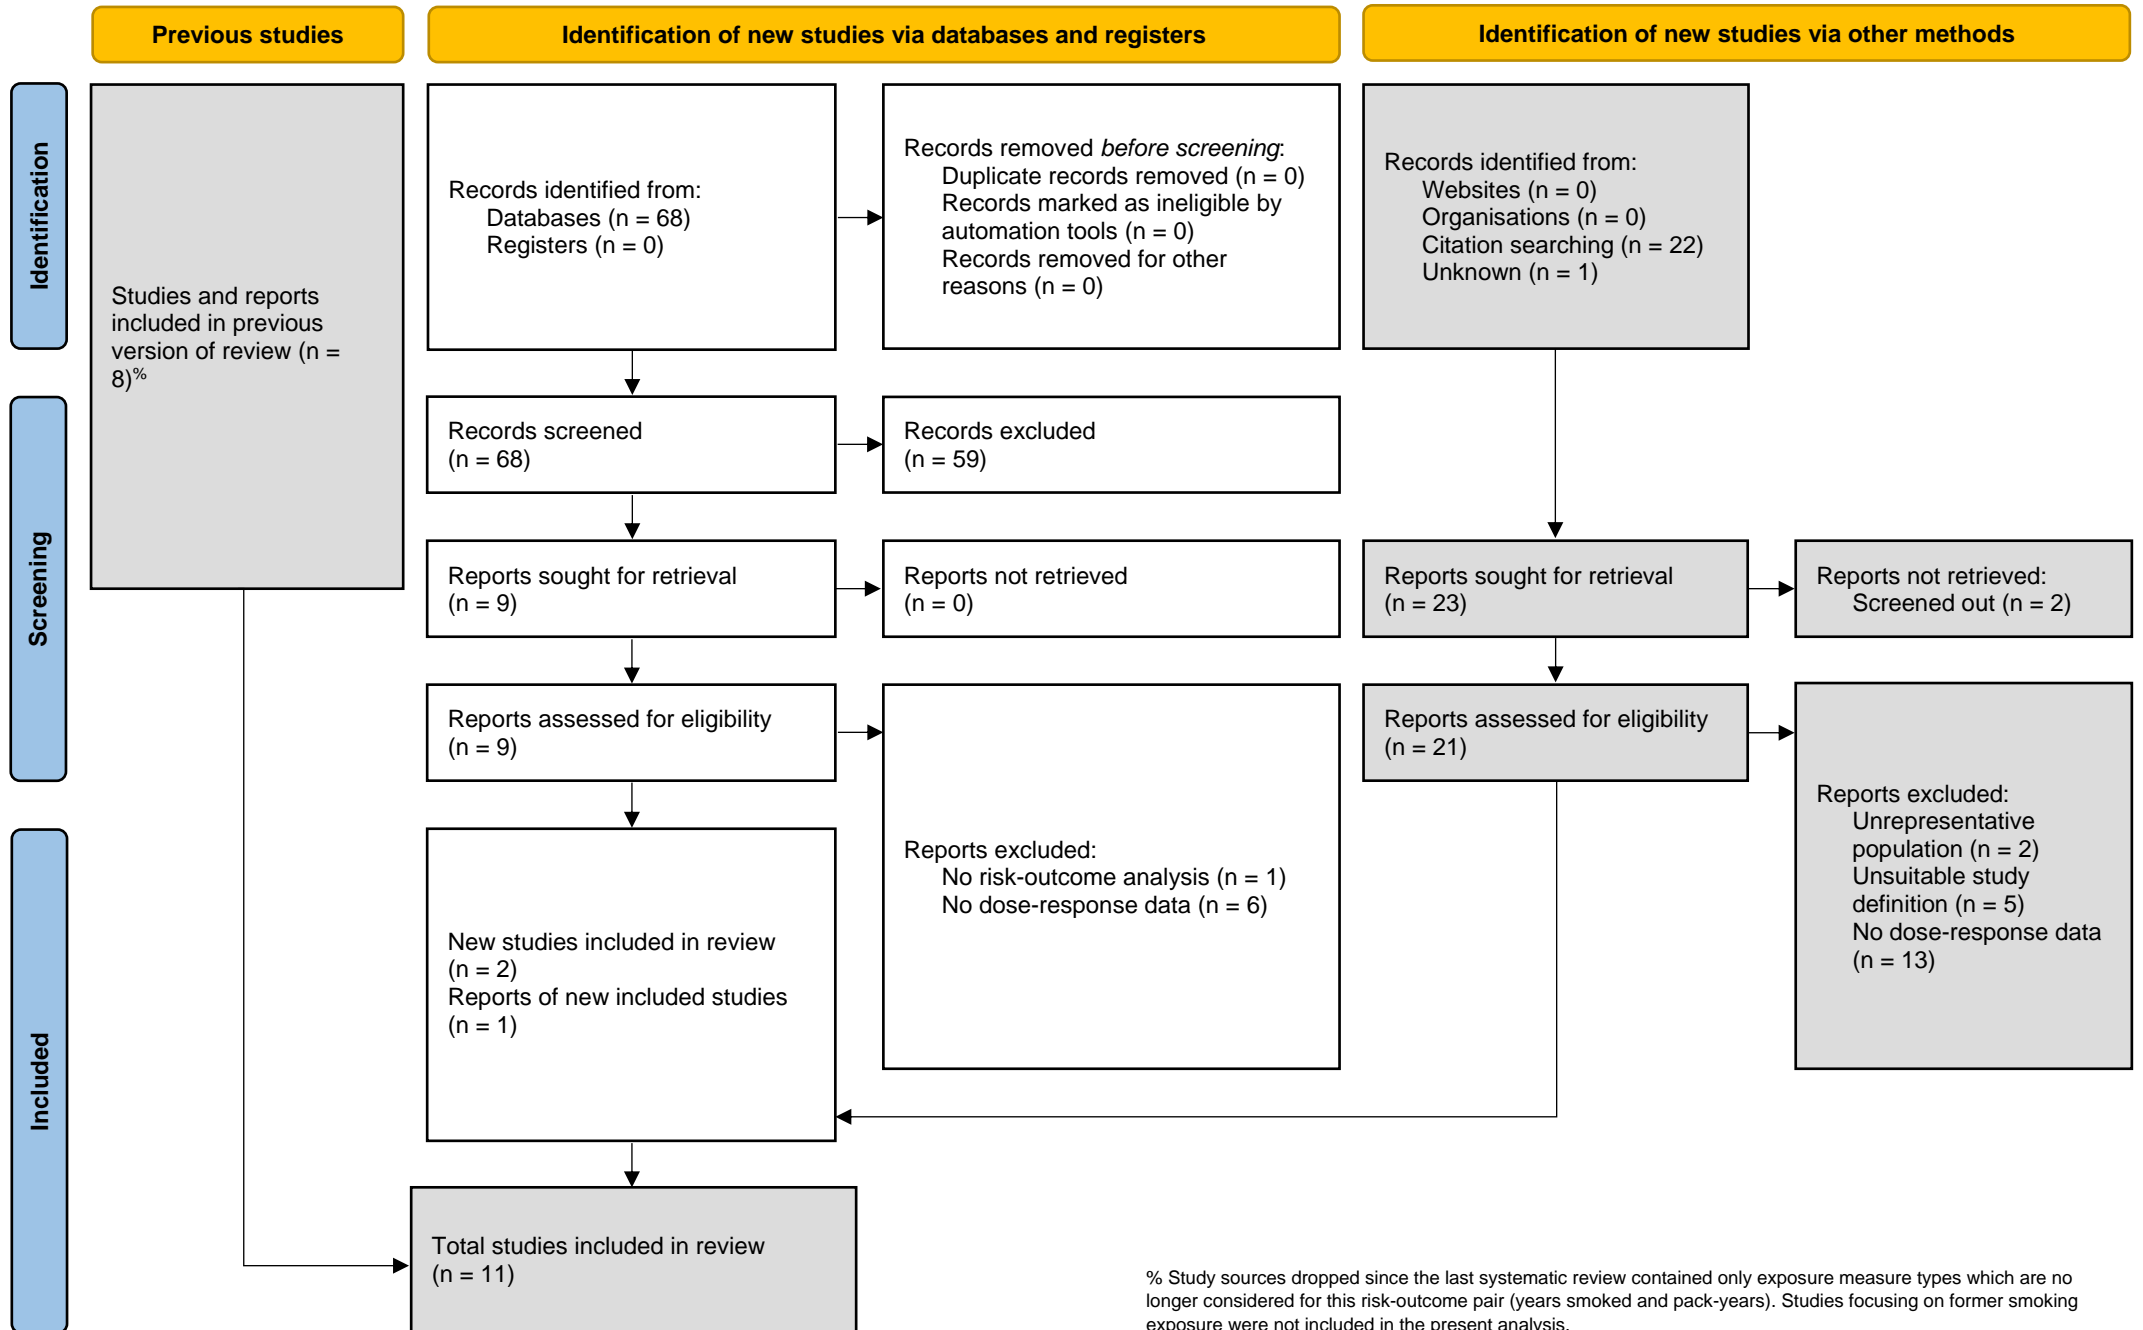

PRISMA 2020 flow diagram for an updated systematic review of the Smoking and Age-related macular degeneration risk-outcome pair

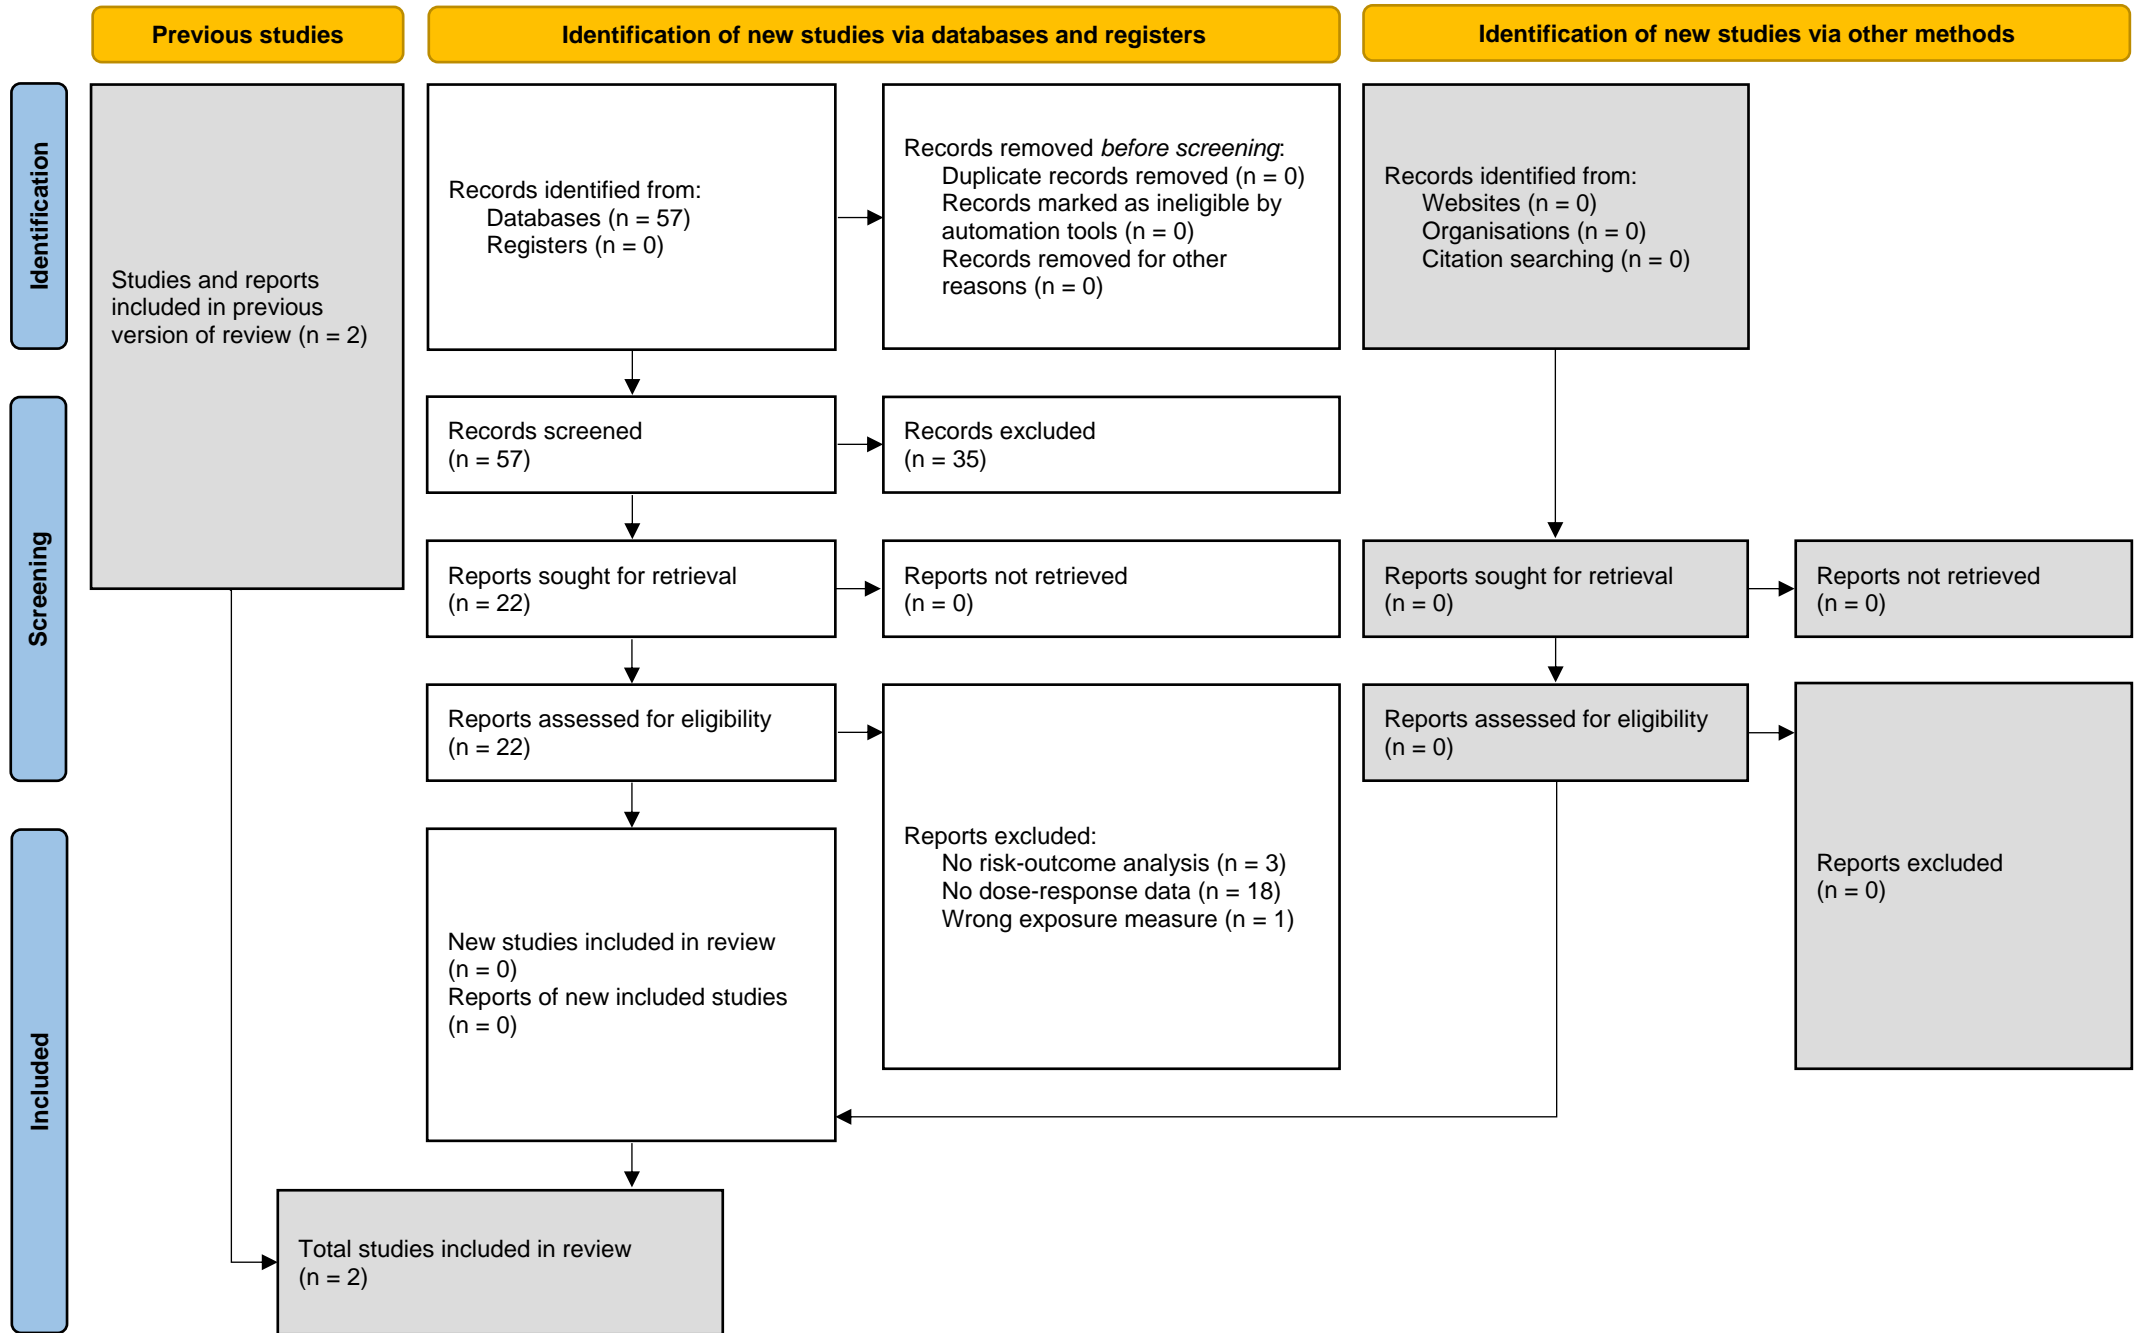

PRISMA 2020 flow diagram for an updated systematic review of the Smoking and Tuberculosis risk-outcome pair

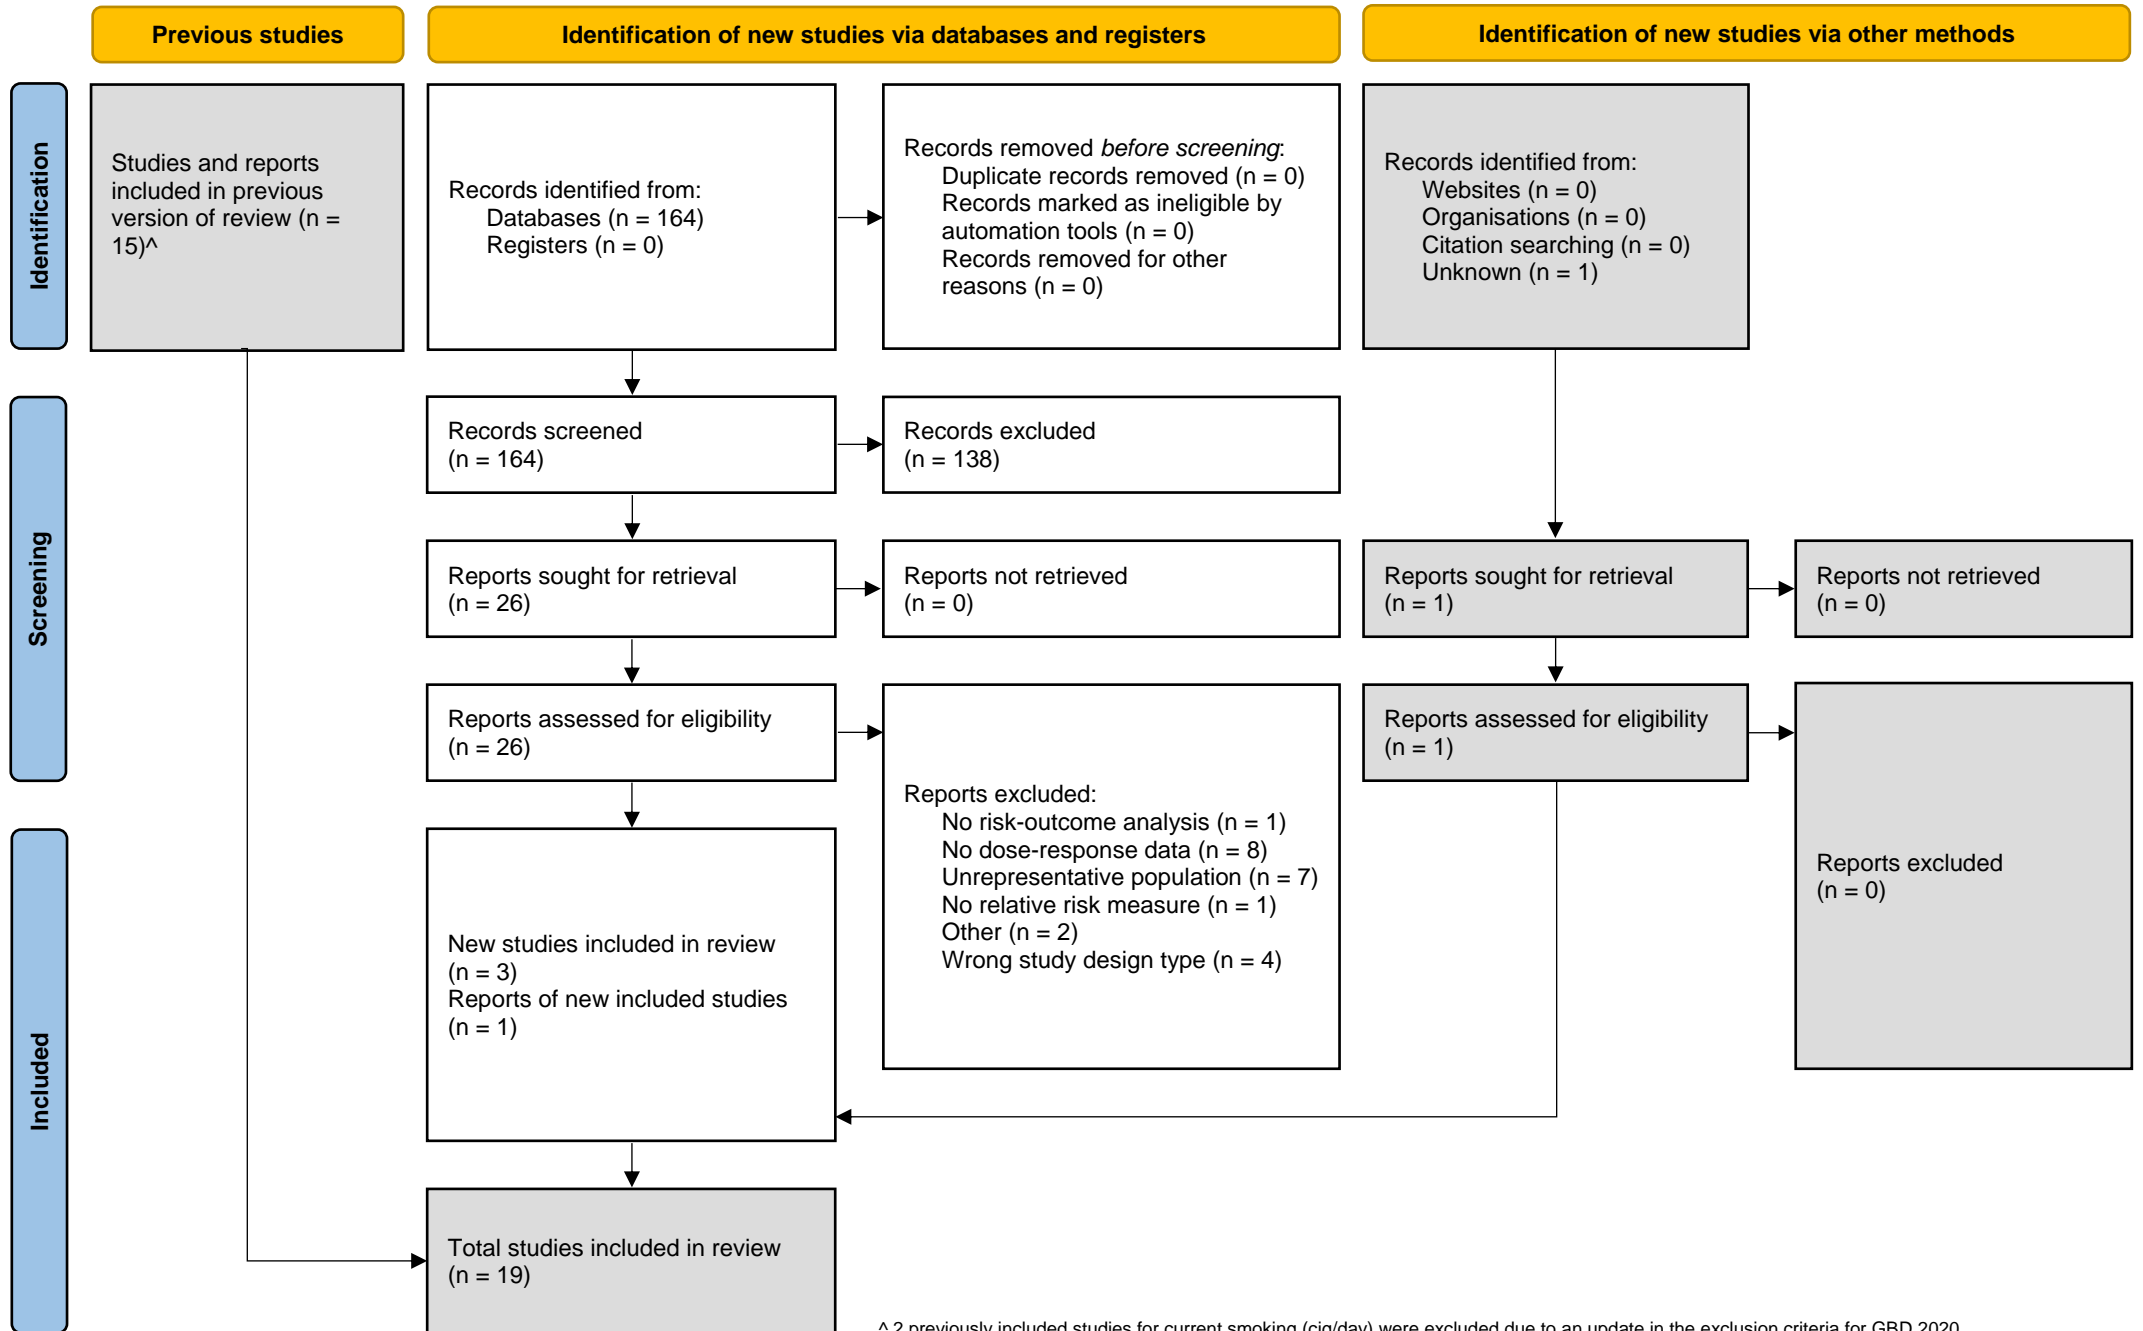

^ 2 previously included studies for current smoking (cig/day) were excluded due to an update in the exclusion criteria for GBD 2020

PRISMA 2020 flow diagram for a new systematic review of the Smoking and Fractures risk-outcome pair

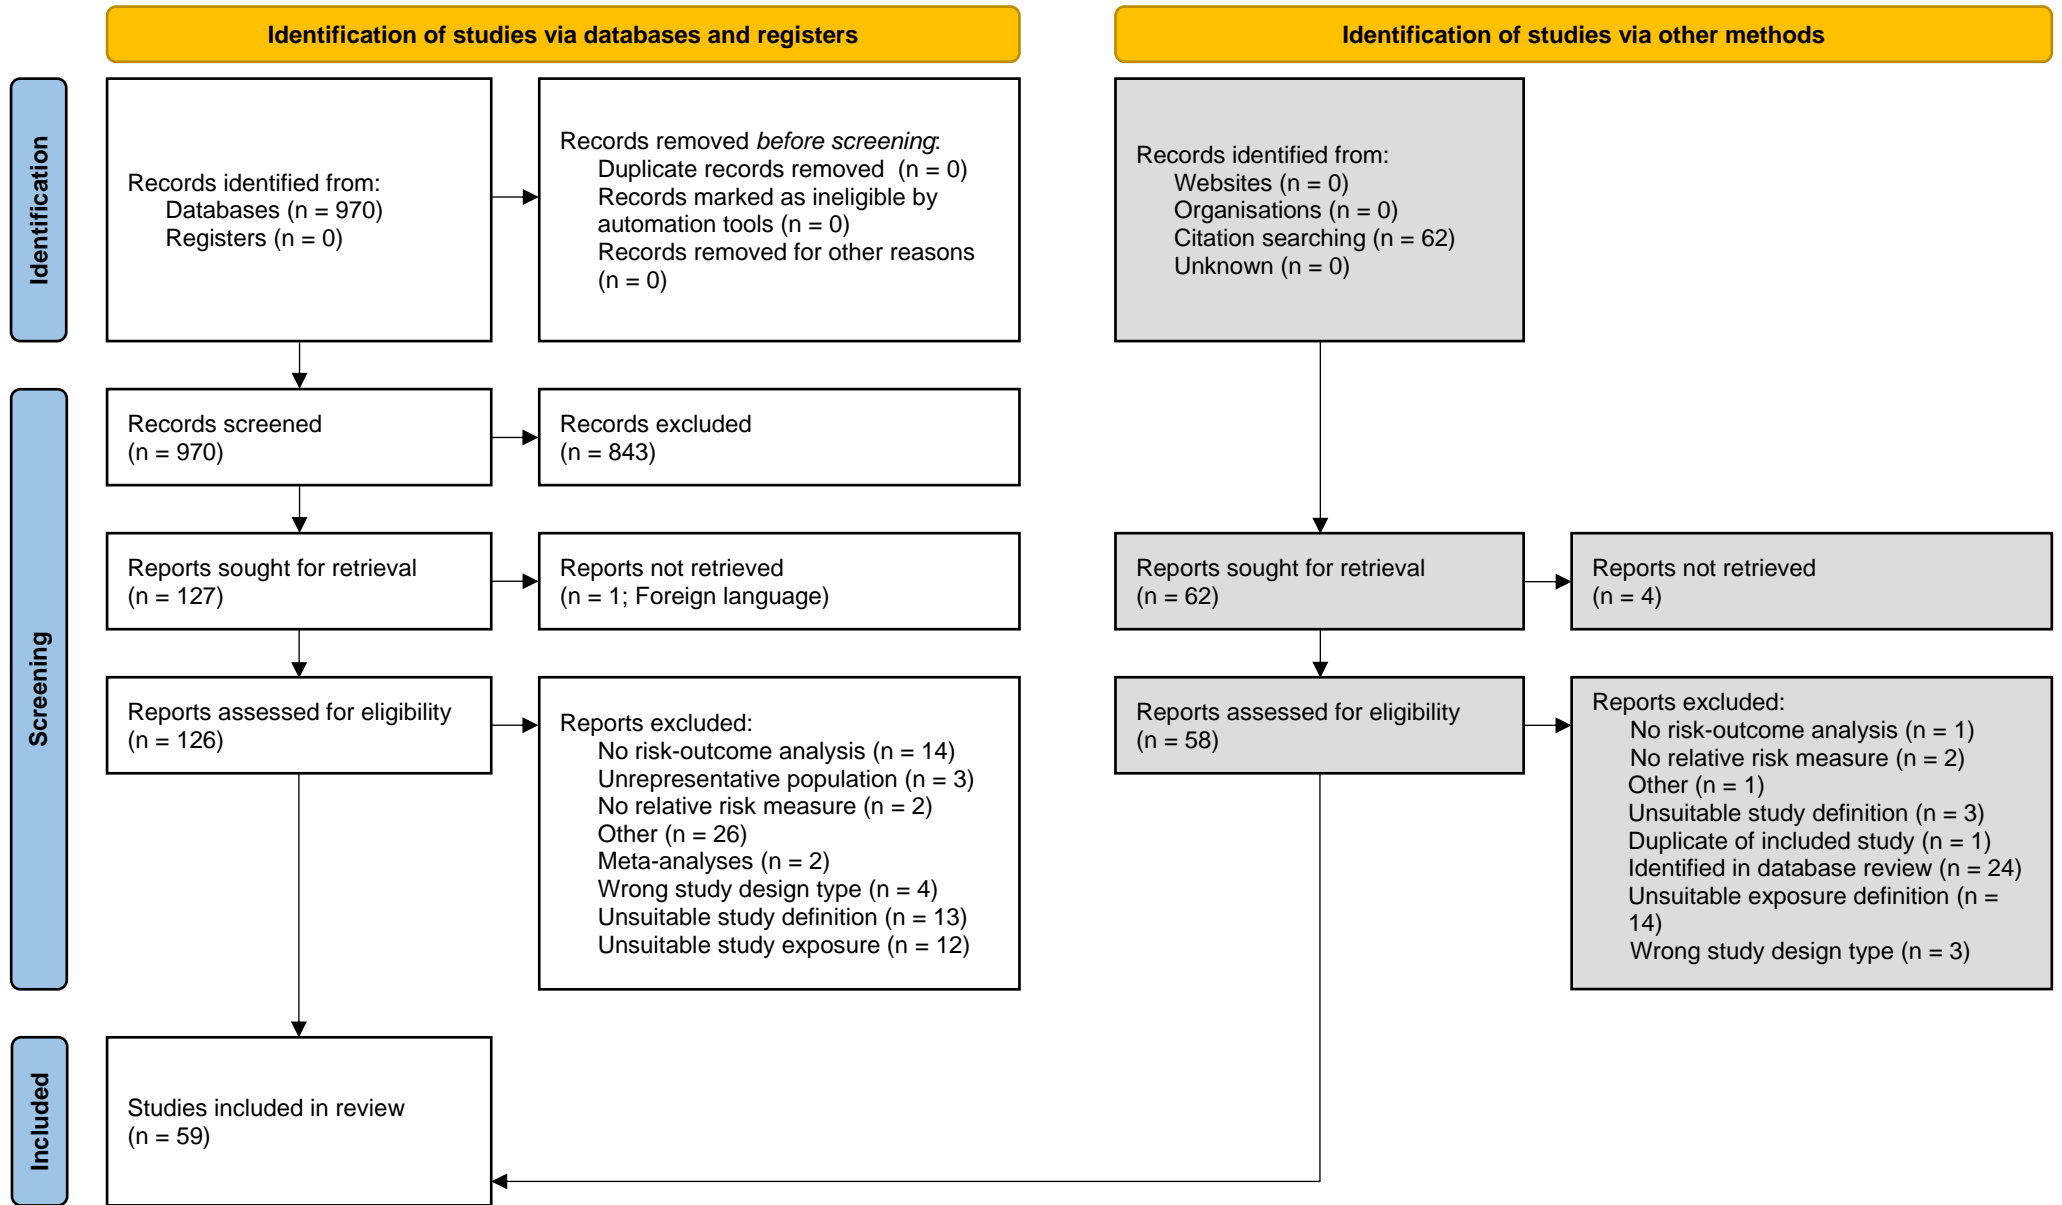

## Section 2: Data inputs

### Section 2.1: Study characteristics

Table 3: Summary of study characteristics

| Cause           | NID    | Underlying NID | Author  | Year | Study name                        | Population                                                                                               | Location       | Study design       | Sex  | Follow-up | Age start | Age end | Exposure assessment             | Endpoint  | Disease ascertainment                                                               | Person-years | Events | Sample size | Outcomes                        | Cases | Controls | Control pool | Exposed |
|-----------------|--------|----------------|---------|------|-----------------------------------|----------------------------------------------------------------------------------------------------------|----------------|--------------------|------|-----------|-----------|---------|---------------------------------|-----------|-------------------------------------------------------------------------------------|--------------|--------|-------------|---------------------------------|-------|----------|--------------|---------|
| aortic_aneurism | 345571 |                | Kahn    | 1966 | U.S. Veterans Study               | U.S. veterans who held U.S. government life insurance policies in 1953                                   | United States  | Prospective cohort | Both | 8.5       | 31        | 84      | Self-administered questionnaire | Mortality | Vital records                                                                       | 2265674      | 491    | 293658      | Nonsyphilitic aneurysm of aorta |       |          |              |         |
| cvd             | 465049 |                | Hammond | 1966 | Cancer Prevention Study I (CPS I) | Individuals in 25 states other than mobile communities and individuals in long-term medical institutions | United States  | Prospective cohort | Both |           | 35        | 84      | Questionnaire                   | Mortality | Vital records, physician confirmation                                               | 3764571      |        | 1003229     | Aortic aneurysm                 |       |          |              |         |
| stroke          | 344362 |                | Ostfeld | 1974 |                                   | Noninstitutionalized Black and white adults receiving Old Age Assistance in Cook County, IL              | United States  | Prospective cohort | Both | 2.675     | 65        | 74      | Administered questionnaire      | Incidence | Medical records, Medical examination                                                |              | 312    | 3141        | Stroke                          |       |          |              |         |
| stroke          | 122237 |                | Okada   | 1976 |                                   | Residents of two rural communities                                                                       | Japan          | Prospective cohort | Both | 7         | 40        | 79      | Self-administered questionnaire | Incidence | Medical records, vital records                                                      | 36696        | 69     | 3778        | Cerebral hemorrhage             |       |          |              |         |
| stroke          | 343647 |                | Doll    | 1976 |                                   | British male doctors                                                                                     | United Kingdom | Prospective cohort | Male | 20        | 20        | 99      | Postal questionnaire            | Mortality | Registrars-General of the United Kingdom, General Medical Council, other registries |              | 616    | 34440       | Cerebral thrombosis             |       |          |              |         |

|                      |        |  |         |      |                                                        |                                                                        |                |                    |        |     |    |    |                                 |                 |                                                              |        |     |        |                                                      |     |      |            |  |
|----------------------|--------|--|---------|------|--------------------------------------------------------|------------------------------------------------------------------------|----------------|--------------------|--------|-----|----|----|---------------------------------|-----------------|--------------------------------------------------------------|--------|-----|--------|------------------------------------------------------|-----|------|------------|--|
| cvd                  | 464286 |  | Petitti | 1978 |                                                        | White women in Northern California                                     | United States  | Case-control       | Female | 33  | 58 |    | Self-administered questionnaire | Incidence       | Discharge records, vital records, hospital admission records |        |     |        | Subarachnoid hemorrhage                              | 11  | 3956 | Population |  |
| ihd                  | 355955 |  | Doll    | 1980 | British Doctors' Study                                 | Doctors residing in the United Kingdom                                 | United Kingdom | Prospective cohort | Female | 22  | 20 | 99 | Mailed questionnaire            | Mortality       | Vital records                                                |        | 179 | 9164   | Ischemic heart disease                               |     |      |            |  |
| lri                  | 355955 |  | Doll    | 1980 | British Doctors' Study                                 | British female doctors                                                 | United Kingdom | Prospective cohort | Female | 22  | 18 | 99 | Self-administered questionnaire | Mortality       | Vital records                                                |        | 44  | 6194   | Pneumonia                                            |     |      |            |  |
| aortic_aneurism      | 350131 |  | Rogot   | 1980 | U.S. Veterans Study                                    | U.S. veterans who held U.S. government life insurance policies in 1953 | United States  | Prospective cohort | Both   | 16  | 31 | 84 | Self-administered questionnaire | Mortality       | Vital records                                                |        | 900 | 248046 | Aortic aneurysm (ICD-7, 451)                         |     |      |            |  |
| aortic_aneurism      | 355955 |  | Doll    | 1980 | British Doctors' Study                                 | Female British doctors listed on the British Medical Register          | United Kingdom | Prospective cohort | Female | 22  | 18 | 99 | Self-administered questionnaire | Mortality       | Vital records                                                |        | 11  | 6194   | Aortic aneurysm (ICD-7)                              |     |      |            |  |
| parkinson            | 355955 |  | Doll    | 1980 | British Doctors' Study                                 | Female doctors who resided in the United Kingdom                       | United Kingdom | Prospective cohort | Female | 22  | 18 | 99 | Mailed questionnaire            | Mortality       | Administrative records                                       |        | 5   | 6194   | Parkinsonism                                         |     |      |            |  |
| parkinson            | 355955 |  | Doll    | 1980 | British Doctors' Study                                 | Female doctors who resided in the United Kingdom                       | United Kingdom | Prospective cohort | Female | 22  | 18 | 99 | Mailed questionnaire            | Mortality       | Administrative records                                       |        | 5   | 6194   | Parkinsonism                                         |     |      |            |  |
| ihd                  | 359114 |  | Willett | 1981 |                                                        | Married registered nurses in 11 US states                              | United States  | Case-control       | Female |     | 30 | 55 | Mailed questionnaire            | Hospitalization | Self-reported, medical records                               |        |     |        | Acute myocardial infarction                          | 249 | 4977 | Population |  |
| gallbladder_diseases | 351491 |  | Layde   | 1982 | Oxford/Family Planning Association Contraceptive Study | Females who attended family planning                                   | United Kingdom | Prospective cohort | Female | 9.1 | 25 | 39 | Interview                       | Incidence       | Surgically-confirmed gallbladder disease ascertained         | 154400 | 227 | 17032  | Surgically-confirmed gallbladder disease (cholelithi |     |      |            |  |

|           |        |  |           |      |                                                                                                 |                                                                                                        |                |                    |        |      |    |    |                            |                                                  |                                                             |  |     |                                                                                           |                                         |     |     |                          |  |
|-----------|--------|--|-----------|------|-------------------------------------------------------------------------------------------------|--------------------------------------------------------------------------------------------------------|----------------|--------------------|--------|------|----|----|----------------------------|--------------------------------------------------|-------------------------------------------------------------|--|-----|-------------------------------------------------------------------------------------------|-----------------------------------------|-----|-----|--------------------------|--|
|           |        |  |           |      | clinics and using oral contraceptives, an intrauterine device, or a diaphragm for birth control |                                                                                                        |                |                    |        |      |    |    |                            | from hospital admissions summaries and diagnoses |                                                             |  |     | asis (ICD-8 574) or cholecystitis (ICD-8 575, with the surgical code for cholecystectomy) |                                         |     |     |                          |  |
| stroke    | 334967 |  | Fuller    | 1983 | Whitehall Study                                                                                 | Male civil servants                                                                                    | United Kingdom | Prospective cohort | Male   | 10   | 40 | 64 | Screening survey           | Mortality                                        | Central registry                                            |  | 84  | 16484                                                                                     | Stroke                                  |     |     |                          |  |
| ihd       | 357948 |  | Rosenberg | 1983 |                                                                                                 | Females enrolled in a study on oral contraceptive use                                                  | United States  | Case-control       | Female |      | 25 | 49 | Standard questionnaire     | Hospitalization                                  | Clinical diagnosis                                          |  |     |                                                                                           | Acute myocardial infarction             | 255 | 796 | Hospital                 |  |
| ihd       | 359320 |  | Kaufman   | 1983 |                                                                                                 | Patients in 78 hospitals in the northeast                                                              | United States  | Case-control       | Male   |      | 30 | 54 | Administered questionnaire | Hospitalization                                  | Clinical diagnosis, medical review                          |  |     |                                                                                           | Nonfatal first myocardial infarction    | 502 | 835 | Hospital                 |  |
| cvd       | 359320 |  | Kaufman   | 1983 |                                                                                                 | Patients in 78 hospitals in the northeast                                                              | United States  | Case-control       | Male   | 30   | 54 |    | Administered questionnaire | Hospitalization                                  | Clinical diagnosis, medical review                          |  |     |                                                                                           | Nonfatal first myocardial infarction    | 502 | 835 | Hospital                 |  |
| fractures | 498442 |  | Seeman    | 1983 |                                                                                                 | Male patients at the Metabolic Bone Disease Clinic with vertebral fractures due to spinal osteoporosis | United States  | Case-control       | Male   |      | 44 | 85 | Administered questionnaire | Incidence                                        | Medical reports                                             |  |     |                                                                                           | Vertebral fractures due to osteoporosis | 105 | 105 | Men with Pagel's disease |  |
| cvd       | 441318 |  | Khaw      | 1984 |                                                                                                 | Adult residents of a white, upper-middle class community in Southern California                        | United States  | Prospective cohort | Both   | 9    | 65 | 84 | Standardized interview     | Mortality                                        | Vital records, family report, hospital and clinical records |  | 73  | 2107                                                                                      | Stroke                                  |     |     |                          |  |
| ihd       | 328460 |  | Kono      | 1985 |                                                                                                 | Male Japanese doctors in 9 prefectural                                                                 | Japan          | Prospective cohort | Male   | 12.7 | 18 | 99 | Administered questionnaire | Mortality                                        | Vital records                                               |  | 121 | 5446                                                                                      | Coronary heart disease (ICD-8 410-414)  |     |     |                          |  |



|                 |        |  |            |      |                        |                                                                                                           |               |                    |      |      |    |    |                                 |                        |                                                  |  |     |       |                                             |      |      |                   |  |
|-----------------|--------|--|------------|------|------------------------|-----------------------------------------------------------------------------------------------------------|---------------|--------------------|------|------|----|----|---------------------------------|------------------------|--------------------------------------------------|--|-----|-------|---------------------------------------------|------|------|-------------------|--|
|                 |        |  |            |      |                        | medical associations                                                                                      |               |                    |      |      |    |    |                                 |                        |                                                  |  |     |       |                                             |      |      |                   |  |
| stroke          | 328460 |  | Kono       | 1985 |                        | Male Japanese doctors in 9 prefectural medical associations                                               | Japan         | Prospective cohort | Male | 12.7 | 18 | 99 | Administered questionnaire      | Mortality              | Vital records                                    |  | 154 | 5446  | Stroke (430-438)                            |      |      |                   |  |
| lung_cancer     | 358213 |  | Vena       | 1985 |                        | White patients admitted to Roswell Park Memorial Institute                                                | United States | Case-control       | Male |      | 35 | 79 | Pre-admission questionnaire     | Incidence              | Clinical records                                 |  |     |       | Lung cancer                                 | 1002 | 2121 | Hospital          |  |
| ihd             | 359113 |  | Rosenberg  | 1985 |                        | Patients in 78 hospitals in the northeast                                                                 | United States | Case-control       | Male |      | 20 | 54 | Administered questionnaire      | Hospitalization        | Admission records                                |  |     |       | First myocardial infarction                 | 1873 | 2775 | Hospital          |  |
| stroke          | 350743 |  | Bonita     | 1986 |                        | Residents of the Auckland region                                                                          | New Zealand   | Case-control       | Both |      | 35 | 64 | Administered questionnaire      | Incidence              | Medical diagnosis                                |  |     |       | Subarachnoid hemorrhage                     | 115  | 1586 | Population survey |  |
| stroke          | 358506 |  | Bonita     | 1986 |                        | Residents of Auckland                                                                                     | New Zealand   | Case-control       | Both |      | 35 | 64 | Administered questionnaire      | Incidence              | Medical diagnosis                                |  |     |       | Stroke                                      | 132  | 1586 | Population        |  |
| liver_cancer    | 343515 |  | Austin     | 1986 |                        | Patients and controls from 12 hospitals affiliated with one of five participating study centers in the US | United States | Case-control       | Both |      | 18 | 80 | Personal interviews             | Incidence              | Medical records, autopsy records                 |  |     |       | Hepatocellular carcinoma                    | 86   | 161  | Hospital based    |  |
| cvd             | 344312 |  | Abbott     | 1986 | Honolulu Heart Program | Men of Japanese ancestry on Oahu                                                                          | United States | Prospective cohort | Male | 12   | 45 | 69 | Self-reported                   | Incidence or Mortality | Hospital records, vital records, autopsy reports |  | 288 | 7872  | Ischemic stroke; Hemorrhagic stroke; Stroke |      |      |                   |  |
| cvd             | 350743 |  | Bonita     | 1986 |                        | Residents of the Auckland region                                                                          | New Zealand   | Case-control       | Both | 35   | 64 |    | Administered questionnaire      | Incidence              | Medical diagnosis                                |  |     |       | Subarachnoid hemorrhage                     | 115  | 1586 | Population survey |  |
| aortic_aneurism | 347380 |  | Carstensen | 1987 |                        | Random sample of                                                                                          | Sweden        | Prospective cohort | Male | 15   | 18 | 69 | Self-administered questionnaire | Mortality              | Vital records                                    |  | 15  | 25129 | Aortic aneurysm                             |      |      |                   |  |

|                           |        |  |          |      |                                                      |                              |                    |        |   |    |    |                                 |                        |                                               |        |     |                                |                                                                                            |     |                                                                                              |  |  |
|---------------------------|--------|--|----------|------|------------------------------------------------------|------------------------------|--------------------|--------|---|----|----|---------------------------------|------------------------|-----------------------------------------------|--------|-----|--------------------------------|--------------------------------------------------------------------------------------------|-----|----------------------------------------------------------------------------------------------|--|--|
|                           |        |  |          |      | Swedish men                                          |                              |                    |        |   |    |    |                                 |                        |                                               |        |     | (ICD-8, 441)                   |                                                                                            |     |                                                                                              |  |  |
| lung_cancer               | 193987 |  | Brownson | 1987 | White adults in Denver metropolitan area             | Colorado, USA                | Case-control       | Both   |   | 30 | 99 | Personal interview              | Incidence              | Disease registry                              |        |     | Lung denocarcinoma (ICD 163)   | 102                                                                                        | 233 | Disease registry                                                                             |  |  |
| alzheimerr_other_dementia | 358838 |  | Shalat   | 1987 | Male patients and residents of eastern Massachusetts | Massachusetts, United States | Case-control       | Male   |   | 18 | 99 | Self-administered questionnaire | Incidence              | Clinical records, autopsy records             |        |     | Alzheimer's                    | 98                                                                                         | 162 | General population                                                                           |  |  |
| parkinson                 | 359161 |  | Rajput   | 1987 | Residents of Rochester                               | United States                | Case-control       | Both   |   | 40 | 99 | Medical records                 | Incidence              | Medical records                               |        |     | Idiopathic Parkinson's disease | 118                                                                                        | 236 | Rochester residents who attended the same medical facility around the same time as the cases |  |  |
| parkinson                 | 359161 |  | Rajput   | 1987 | Residents of Rochester                               | United States                | Case-control       | Both   |   | 40 | 99 | Medical records                 | Incidence              | Medical records                               |        |     | Idiopathic Parkinson's disease | 118                                                                                        | 236 | Rochester residents who attended the same medical facility around the same time as the cases |  |  |
| stroke                    | 344359 |  | Colditz  | 1988 | Nurses' Health Study<br>Female registered nurses     | United States                | Prospective cohort | Female | 8 | 30 | 55 | Self-administered questionnaire | Incidence or Mortality | Self-reported, medical records, vital records | 908447 | 274 | 118539                         | Total stroke (subarachnoid hemorrhage, intracerebral hemorrhage, thrombotic stroke, other) |     |                                                                                              |  |  |

|                           |        |  |           |      |                        |                                                                                    |                |                    |        |    |    |    |                                  |                        |                                                                |      |     |      |                                       |     |      |                              |  |  |
|---------------------------|--------|--|-----------|------|------------------------|------------------------------------------------------------------------------------|----------------|--------------------|--------|----|----|----|----------------------------------|------------------------|----------------------------------------------------------------|------|-----|------|---------------------------------------|-----|------|------------------------------|--|--|
| stroke                    | 344360 |  | Wolf      | 1988 | Framingham Heart Study | Adults in Framingham, MA                                                           | United States  | Prospective cohort | Both   | 26 | 36 | 68 | Systematic examination           | Incidence or Mortality | Medical records, Medical examination                           |      | 459 | 4255 | Stroke or Transient ischemic attack   |     |      |                              |  |  |
| cvd                       | 432105 |  | Syrjanen  | 1988 |                        | Patients from Helsinki University Central Hospital                                 | Finland        | Case-control       | Both   | 17 | 49 |    | Interview                        | Incidence              | Medical diagnosis                                              |      |     |      | Ischemic stroke                       | 54  | 54   | Population                   |  |  |
| cvd                       | 464146 |  | Oleckno   | 1988 |                        | Patients from four community hospitals in northern Illinois                        | United States  | Case-control       | Female | 15 | 40 |    | Medical records                  | Incidence              | Disease registry, medical records                              |      |     |      | Stroke                                | 54  | 864  | Population                   |  |  |
| cataracts                 | 350491 |  | Flaye     | 1989 | City Eye Study         | Residents living around London                                                     | United Kingdom | Prospective cohort | Both   | 3  | 54 | 65 | Self-administered questionnaire  | Incidence              | Physician diagnosis                                            |      | 95  | 1012 | Nuclear opacity                       |     |      |                              |  |  |
| fractures                 | 414225 |  | Wickham   | 1989 |                        | Residents of eight study areas                                                     | United Kingdom | Prospective cohort | Female | 15 | 65 | 99 | Interview and medical assessment | Incidence              | Medical records                                                | 7870 | 44  | 1340 | Hip fracture                          |     |      |                              |  |  |
| ihd                       | 357353 |  | Gramenzi  | 1989 |                        | Coronary care units in northern Italy                                              | Italy          | Case-control       | Female |    | 22 | 69 | PENDING ILLIAD                   | Hospitalization        | Hospital records                                               |      |     |      | Acute myocardial infarction           | 262 | 519  | Hospital                     |  |  |
| ihd                       | 357456 |  | Quek      | 1989 |                        | Females admitted to the coronary care unit of the General Hospital in Kuala Lumpur | Malaysia       | Case-control       | Female |    | 30 | 99 | Administered interview           | Hospitalization        | Clinical diagnosis based on clinical symptoms and test results |      |     |      | Acute myocardial infarction           | 264 | 437  | Hospital                     |  |  |
| ihd                       | 359115 |  | Palmer    | 1989 |                        | Patients in 78 hospitals in the northeast                                          | United States  | Case-control       | Female |    | 25 | 64 | Administered questionnaire       | Hospitalization        | Admission records                                              |      |     |      | Nonfatal first myocardial infarction  | 910 | 2375 | Hospital                     |  |  |
| stroke                    | 357431 |  | Gill      | 1989 |                        | Patients in two medical centers                                                    | United Kingdom | Case-control       | Both   |    | 20 | 70 | Administered questionnaire       | Hospitalization        | Medical records and clinical diagnosis                         |      |     |      | Stroke                                | 621 | 573  | Survey of industrial workers |  |  |
| peripheral_artery_disease | 369290 |  | Skalkidis | 1989 |                        | Laikon Hospita in Athens                                                           | Greece         | Case-control       | Both   |    | 18 | 99 | Interview                        | Incidence              | Medical evaluation                                             |      |     |      | Peripheral arterial occlusive disease | 100 | 100  | Hospital                     |  |  |

|                |        |  |             |      |                                                                     |                                                                             |                         |                      |        |      |    |                            |                            |                                        |                                                                          |         |      |                                                         |     |                                                                 |                                                |  |
|----------------|--------|--|-------------|------|---------------------------------------------------------------------|-----------------------------------------------------------------------------|-------------------------|----------------------|--------|------|----|----------------------------|----------------------------|----------------------------------------|--------------------------------------------------------------------------|---------|------|---------------------------------------------------------|-----|-----------------------------------------------------------------|------------------------------------------------|--|
| lbp            | 409803 |  | Ryden       | 1989 |                                                                     | Employees of the Children's Hospital and Health Center in San Diego         | United States           | Case-control         | Both   | 18   | 99 | Employee health records    | Incidence                  | Employee health records                |                                                                          |         |      | Low-back injury                                         | 84  | 168                                                             | Selected from the same population as the cases |  |
| cvd            | 357431 |  | Gill        | 1989 |                                                                     | Patients in two medical centers                                             | United Kingdom          | Case-control         | Both   | 20   | 70 | Administered questionnaire | Hospitalization            | Medical records and clinical diagnosis |                                                                          |         |      | Stroke                                                  | 621 | 573                                                             | Survey of industrial workers                   |  |
| cvd            | 464154 |  | Thompson    | 1989 |                                                                     | Women from 83 practices throughout the UK                                   | United Kingdom          | Nested case-control  | Female | 45   | 69 | Interview                  | Incidence                  | Medical records                        |                                                                          |         |      | Stroke; Ischemic heart disease; Cardiovascular diseases | 603 | 1206                                                            | Cohort population                              |  |
| bladder_cancer | 344435 |  | Burch       | 1989 |                                                                     | Residents in the province of Alberta, Toronto, and southern-central Ontario | Canada                  | Case-control         | Both   | 35   | 79 | Interview                  | Incidence                  | Biomarker                              |                                                                          |         |      | Bladder cancer                                          | 835 | 792                                                             | From province-wide, annually updated listings  |  |
| fractures      | 498444 |  | Kleerekoper | 1989 |                                                                     | Postmenopausal white females                                                | Michigan, United States | Retrospective Cohort | Female | 45   | 75 | Questionnaire              | Incidence                  | Hospital records                       | 529                                                                      | 663     |      | Vertebral and Non-vertebral fracture                    |     |                                                                 |                                                |  |
| copd           | 343461 |  | Hirayama    | 1990 | Six Prefecture Cohort Study                                         | General population of six prefectures from across Japan                     | Japan                   | Prospective cohort   | Both   | 14.5 | 40 | 99                         | Self-report                | Mortality                              | Administrative medical records or disease registries, death certificates | 3849637 |      | 265118                                                  |     |                                                                 | Cancer of the stomach (as coded by ICD-7)      |  |
| ihd            | 343461 |  | Hirayama    | 1990 | Six Prefectures Study                                               | Residents of 29 health center districts                                     | Japan                   | Prospective cohort   | Both   | 17   | 40 | 99                         | Administered questionnaire | Mortality                              | Disease registry, vital records                                          | 3849637 | 3548 | 265118                                                  |     |                                                                 | Ischemic heart disease                         |  |
| peptic_ulcer   | 262563 |  | Anda        | 1990 | First National Health and Nutrition Examination Survey Epidemiology | Noninstitutionalized female adult population of the United States           | United States           | Prospective cohort   | Female | 9    | 24 | 76                         | Interview                  | Incidence                              | Self-reported physician diagnosis, hospital discharge records,           | 140     | 2851 |                                                         |     | Gastric ulcer, duodenal ulcer, or peptic ulcer site unspecified |                                                |  |

|                 |        |  |          |      |                                      |                                                                     |               |                     |        |      |    |    |                            |                        |                                    |         |      |        |                                                                            |      |      |  |                                                                                                                                  |
|-----------------|--------|--|----------|------|--------------------------------------|---------------------------------------------------------------------|---------------|---------------------|--------|------|----|----|----------------------------|------------------------|------------------------------------|---------|------|--------|----------------------------------------------------------------------------|------|------|--|----------------------------------------------------------------------------------------------------------------------------------|
|                 |        |  |          |      | gic Follow-up Study (NHEFS)          |                                                                     |               |                     |        |      |    |    |                            | death certificates     |                                    |         |      |        | d (ICD-9 531.0-533.9)                                                      |      |      |  |                                                                                                                                  |
| prostate_cancer | 347383 |  | Hsing    | 1990 | Lutheran Brotherhood Cohort          | White male insurance policy holders                                 | United States | Prospective cohort  | Male   | 10   | 35 |    | Mailed questionnaire       | Mortality              | Vital records                      | 286731  | 149  | 26030  | Prostate cancer                                                            |      |      |  |                                                                                                                                  |
| parkinson       | 359307 |  | Sasco    | 1990 |                                      | Males who attended either Harvard of the University of Pennsylvania | United States | Nested case-control | Male   |      | 15 | 25 | Administrative records     | Incidence              | Self-report, death certificates    |         |      |        | Parkinson's disease                                                        | 96   | 384  |  | Live subjects from the same cohort as the cases who self-reported in the 1976-78 questionnaire as not having Parkinson's disease |
| breast_cancer   | 310487 |  | Chu      | 1990 |                                      | General population                                                  | United States | Case-control        | Female |      | 20 | 54 | Interview                  | Incidence              | Population-based cancer registries |         |      |        | Histologically-confirmed breast cancer                                     | 4730 | 4688 |  | Residents from the same geographic areas as the cases                                                                            |
| cvd             | 343461 |  | Hirayama | 1990 | Six Prefectures Study                | Residents of 29 health center districts                             | Japan         | Prospective cohort  | Both   | 17   | 40 | 99 | Administered questionnaire | Mortality              | Disease registry, vital records    | 3849637 | 3548 | 265118 | Ischemic heart disease                                                     |      |      |  |                                                                                                                                  |
| cvd             | 464527 |  | Harmsen  | 1990 | Multifactor Primary Prevention Study | Men in Goteborg                                                     | Sweden        | Prospective cohort  | Male   | 11.8 | 47 | 55 | Postal questionnaire       | Incidence or Mortality | Disease registry, vital records    |         | 230  | 7495   | Subarachnoid hemorrhage; Intracerebral hemorrhage; Ischemic stroke; Stroke |      |      |  |                                                                                                                                  |
| parkinson       | 359307 |  | Sasco    | 1990 |                                      | Males who attended either Harvard of                                | United States | Nested case-control | Male   |      | 15 | 25 | Administrative records     | Incidence              | Self-report, death certificates    |         |      |        | Parkinson's disease                                                        | 96   | 384  |  | Live subjects from the same                                                                                                      |

|                 |        |        |        |      |                                                 |                                                               |                     |                     |        |      |    |                      |                            |                        |                                            |      |        |                         |      |      |                                                                                                      |  |
|-----------------|--------|--------|--------|------|-------------------------------------------------|---------------------------------------------------------------|---------------------|---------------------|--------|------|----|----------------------|----------------------------|------------------------|--------------------------------------------|------|--------|-------------------------|------|------|------------------------------------------------------------------------------------------------------|--|
|                 |        |        |        |      | the University of Pennsylvania                  |                                                               |                     |                     |        |      |    |                      |                            |                        |                                            |      |        |                         |      |      | cohort as the cases who self-reported in the 1976-78 questionnaire as not having Parkinson's disease |  |
| bladder_cancer  | 502468 |        | Harris | 1990 |                                                 | Hospital patients                                             | United States       | Case-control        | Both   | 24   | NA | Structured interview | Incidence                  | Hospital records       |                                            |      |        | Bladder cancer          | 1663 | 4930 | Patients with with primary diagnoses judged unrelated to tobacco and/or alcohol use                  |  |
| prostate_cancer | 343354 | 347952 | Hsing  | 1991 | US Veterans' Cohort                             | Veterans who served in the Armed forces between 1917 and 1940 | United States       | Prospective cohort  | Male   | 26   | 31 | 84                   | Questionnaire              | Mortality              | Insurance records                          | 4607 | 293916 | Prostate cancer         |      |      |                                                                                                      |  |
| stroke          | 334410 |        | Kuller | 1991 | Multiple Risk Factor Intervention Trial (MRFIT) | Men screened at 22 centers                                    | United States       | Prospective cohort  | Male   | 10.5 | 35 | 57                   | Screening survey           | Mortality              |                                            | 262  | 361662 | Stroke                  |      |      |                                                                                                      |  |
| stroke          | 343297 |        | Shaper | 1991 | British regional heart study                    | Patients at general practices in 24 towns                     | United Kingdom      | Prospective cohort  | Male   | 8    | 40 | 59                   | Administered questionnaire | Incidence or Mortality | Vital records, Disease registry            | 110  | 7735   | Stroke (ICD 430-8)      |      |      |                                                                                                      |  |
| lung_cancer     | 193948 |        | Liu    | 1991 |                                                 | Farmers in Xuanwei, China                                     | China               | Case-control        | Male   |      | 18 | 99                   | Administered questionnaire | Incidence              | Pathological diagnosis or clinical history |      |        | Lung cancer             | 56   | 224  | Population                                                                                           |  |
| lung_cancer     | 355963 |        | Potter | 1991 |                                                 | Women from the 1985 Iowa                                      | Iowa, United States | Nested case-control | Female |      | 55 | 69                   | Mailed questionnaire       | Incidence              | Disease registry                           |      |        | Lung cancer (ICD 0-162) | 109  | 2009 | Population                                                                                           |  |

|                |        |  |               |      |                              |                                                                                                |                         |                    |        |     |     |     |                                 |                              |                                                    |        |     |       |  |                                      |      |      |                                                                                    |
|----------------|--------|--|---------------|------|------------------------------|------------------------------------------------------------------------------------------------|-------------------------|--------------------|--------|-----|-----|-----|---------------------------------|------------------------------|----------------------------------------------------|--------|-----|-------|--|--------------------------------------|------|------|------------------------------------------------------------------------------------|
|                |        |  |               |      |                              | driver's license list                                                                          |                         |                    |        |     |     |     |                                 |                              |                                                    |        |     |       |  |                                      |      |      |                                                                                    |
| lung_cancer    | 357961 |  | Becher        | 1991 |                              | Hospital cases and controls and population controls from residence registries in the northwest | Germany                 | Case-control       | Both   |     | 33  | 90  | Administered interviews         | Incidence                    | Clinical records of histologically confirmed cases |        |     |       |  | Histologically confirmed lung cancer | 194  | 582  | Hospital, Population                                                               |
| cvd            | 408694 |  | Knekt         | 1991 | Social Insurance Institution | Residents of 34 rural, semirurban, and industrial communities                                  | Finland                 | Prospective cohort | Both   | 5   | 20  | 69  | Self-administered questionnaire | Hospitalization or Mortality | Hospital discharge records, vital records          | 503485 | 187 | 42862 |  | Subarachnoid hemorrhage              |      |      |                                                                                    |
| cvd            | 465269 |  | Mangion       | 1991 |                              | Elderly population attending a medical outpatient clinic                                       | New Zealand             | Cross-sectional    | Both   | 68  | 92  |     | Self-report                     | Prevalence                   | Biomarker                                          |        | 147 | 295   |  | Peripheral artery disease            |      |      | 94                                                                                 |
| bladder_cancer | 502452 |  | Burns         | 1991 |                              | Residents of the metropolitan Detroit, Michigan (United States)                                | Michigan, United States | Case-control       | Both   |     | 40  | 84  | Telephone interview             | Incidence                    | Cancer registry                                    |        |     |       |  | Bladder cancer                       | 2160 | 3979 | Controls were persons diagnosed with cancer of the colon or rectum                 |
| fractures      | 261377 |  | Paganini-Hill | 1991 | Leisure World study          | All residents of Leisure World, Laguna Hills                                                   | Los Angeles, California | Prospective cohort |        | 4.8 | ≤65 | ≥85 | Self-administered questionnaire | Incidence                    | Hospital records                                   | 66785  | 86  | 13987 |  | Hip fracture                         |      |      |                                                                                    |
| fractures      | 498410 |  | Vecchia       | 1991 |                              | Women admitted to network of teaching and general hospitals in the greater Milan area          | Milan, Italy            | Case-control       | Female |     | 29  | 74  | Questionnaire                   | Incidence                    | Medical reports                                    |        |     |       |  | Hip/proximal femur fracture          | 209  | 1449 | Patients at same network of hospitals admitted for non-traumatic, acute conditions |

|                      |        |  |            |      |                          |                                                                                                                        |                       |                     |        |     |    |    |                                 |                 |                                                            |        |      |       |                                                         |     |     |            |  |
|----------------------|--------|--|------------|------|--------------------------|------------------------------------------------------------------------------------------------------------------------|-----------------------|---------------------|--------|-----|----|----|---------------------------------|-----------------|------------------------------------------------------------|--------|------|-------|---------------------------------------------------------|-----|-----|------------|--|
| lung_cancer          | 355961 |  | Chyou      | 1992 | Honolulu Heart Program   | American men of Japanese ancestry in Oahu                                                                              | Hawaii, United States | Prospective cohort  | Male   | 22  | 46 | 65 | Administered interview          | Incidence       | Disease surveillance of hospitals with tissue confirmation |        | 212  | 8009  | Lung cancer (ICD-8 162.1)                               |     |     |            |  |
| cataracts            | 350493 |  | Hankinson  | 1992 | Nurses' Health Study     | Female registered nurses living in one of 11 US states                                                                 | United States         | Prospective cohort  | Female | 8   | 45 | 67 | Self-administered questionnaire | Incidence       | Medical records, physician diagnosis                       | 470302 | 493  | 50828 | Senile cataract, cataract extraction                    |     |     |            |  |
| cataracts            | 359119 |  | Christen   | 1992 | Physicians' Health Study | Male physicians in the US                                                                                              | United States         | Prospective cohort  | Male   | 5   | 40 | 84 | Self-administered questionnaire | Incidence       | Medical records                                            |        | 557  | 17824 | Cataract                                                |     |     |            |  |
| gallbladder_diseases | 350721 |  | Stampfer   | 1992 | Nurses' Health Study     | Female registered nurses living in eleven large states in the United States                                            | United States         | Prospective cohort  | Female | 6.7 | 34 | 59 | Mailed questionnaire            | Incidence       | Self-reported in mailed questionnaire                      | 607104 | 2610 | 90302 | Cholecystectomy or symptomatic but unremoved gallstones |     |     |            |  |
| lung_cancer          | 357351 |  | Jockel     | 1992 |                          | Patients and hospital controls from seven hospitals in five German cities, and population controls from the city areas | Germany               | Case-control        | Both   |     | 38 | 87 | Administered interview          | Incidence       | Clinical records of histologically confirmed lesions       |        |      |       | Lung cancer                                             | 194 | 582 | Population |  |
| lung_cancer          | 358479 |  | Chiazze    | 1992 |                          | Participants in the Newark (TIMA) plant cohort                                                                         | Ohio, United States   | Nested case-control | Both   |     | 18 | 99 | Administered interviews         | Mortality       | Death records coded by a qualified nosologist              |        |      |       | Lung cancer                                             | 144 | 404 | Population |  |
| ihd                  | 309699 |  | Kalandidi  | 1992 |                          | Patients at the Hippokraton Hospital                                                                                   | Greece                | Case-control        | Both   |     | 30 | 99 | Interviews                      | Hospitalization | Diagnosis with hospitalization                             |        |      |       | Coronary heart disease                                  | 329 | 570 | Hospital   |  |
| stroke               | 298316 |  | Longstreth | 1992 |                          | Residents of King County, Washington                                                                                   | United States         | Case-control        | Both   |     | 18 | 99 | Structured in-person interview  | Incidence       | Disease surveillance, emergency medical system reports,    |        |      |       | Subarachnoid hemorrhage                                 | 149 | 298 | Population |  |



|                |        |  |                 |      |  |                                                                                                                                                                                                                       |       |              |      |  |    |    |           |                 |                     |  |  |  |  |                                               |     |     |                                                                                                                                                                                                                                                                             |
|----------------|--------|--|-----------------|------|--|-----------------------------------------------------------------------------------------------------------------------------------------------------------------------------------------------------------------------|-------|--------------|------|--|----|----|-----------|-----------------|---------------------|--|--|--|--|-----------------------------------------------|-----|-----|-----------------------------------------------------------------------------------------------------------------------------------------------------------------------------------------------------------------------------------------------------------------------------|
|                |        |  |                 |      |  |                                                                                                                                                                                                                       |       |              |      |  |    |    |           | medical records |                     |  |  |  |  |                                               |     |     |                                                                                                                                                                                                                                                                             |
| parkinson      | 359162 |  | Jimenez-Jimenez | 1992 |  | Population from within a single health area of Madrid                                                                                                                                                                 | Spain | Case-control | Both |  | 18 | 99 | Interview | Incidence       | Medical records     |  |  |  |  | Parkinson's disease                           | 128 | 256 | Patients at the same hospital as the cases who attended the emergency room with nonneurological ailments                                                                                                                                                                    |
| stomach_cancer | 340554 |  | Hoshiyama       | 1992 |  | Cases and controls admitted to the Saitama Cancer Center Hospital, which covers seven provincial cities and two town within its vicinity; additional population controls were selected from across Saitama prefecture | Japan | Case-control | Both |  | 18 | 99 | Interview | Incidence       | Physician diagnosis |  |  |  |  | Newly diagnosed adenocarcinoma of the stomach | 294 | 496 | Hospital controls: inpatients without neoplasms, without digestive diseases, lived in Saitama prefecture for at least 10 years, and not on a long-term special diet for medical reasons; Population controls: Study area resident randomly selected from the electoral roll |

|                       |        |  |                 |      |  |                                                                                                                                           |               |              |      |    |    |                                 |                                 |                                                                         |                  |  |  |                                           |                                     |     |            |                                                |  |
|-----------------------|--------|--|-----------------|------|--|-------------------------------------------------------------------------------------------------------------------------------------------|---------------|--------------|------|----|----|---------------------------------|---------------------------------|-------------------------------------------------------------------------|------------------|--|--|-------------------------------------------|-------------------------------------|-----|------------|------------------------------------------------|--|
| laryngeal_cancer      | 298147 |  | Zheng           | 1992 |  | Residents of urban Shanghai                                                                                                               | China         | Case-control | Male |    | 20 | 75                              | Structured interview            | Incidence                                                               | Disease registry |  |  |                                           | Laryngeal cancer                    | 177 | 269        | General population                             |  |
| nasopharyngeal_cancer | 346030 |  | Nam             | 1992 |  | Randomly selected white Americans who died of nasopharyngeal carcinoma and those that died of causes unrelated to smoking and alcohol use | United States | Case-control | Both |    | 18 | 99                              | Self-administered questionnaire | Mortality                                                               | Vital records    |  |  |                                           | Nasopharyngeal carcinoma            | 204 | 408        | General population                             |  |
| kidney_cancer         | 358807 |  | McCredie        | 1992 |  | Residents of New South Wales                                                                                                              | Australia     | Case-control | Both |    | 20 | 79                              | Self-administered questionnaire | Incidence                                                               | Disease registry |  |  |                                           | Kidney cancer, renal cell carcinoma | 489 | 523        | General population                             |  |
| cvd                   | 298316 |  | Longstreth      | 1992 |  | Residents of King County, Washington                                                                                                      | United States | Case-control | Both | 18 | 99 | Structured in-person interview  | Incidence                       | Disease surveillance, emergency medical system reports, medical records |                  |  |  | Subarachnoid hemorrhage                   | 149                                 | 298 | Population |                                                |  |
| cvd                   | 294115 |  | Huhtasaari      | 1992 |  | Male residents of northern Sweden                                                                                                         | Sweden        | Case-control | Male | 35 | 54 | Self-administered questionnaire | Incidence                       | Physician diagnosis, discharge registers, vital records                 |                  |  |  | Ischemic heart disease                    | 585                                 | 589 | Population |                                                |  |
| cvd                   | 464829 |  | Woo             | 1992 |  | Chinese patients admitted to a district general hospital in Hong Kong                                                                     | Hong Kong     | Case-control | Both | 45 | 69 | Self-administered-questionnaire | Hospitalization                 | Clinical diagnosis, autopsy                                             |                  |  |  | Ischemic stroke; Intracerebral hemorrhage | 278                                 | 278 | Population |                                                |  |
| parkinson             | 359162 |  | Jimenez-Jimenez | 1992 |  | Population from within a single health area of Madrid                                                                                     | Spain         | Case-control | Both |    | 18 | 99                              | Interview                       | Incidence                                                               | Medical records  |  |  |                                           | Parkinson's disease                 | 128 | 256        | Patients at the same hospital as the cases who |  |

|                      |        |  |                    |      |                                                                        |                                                                                                       |                       |                    |        |      |    |    |                                 |                        |                                                 |         |     |        |  |  |                                                           |     |      |                                                        |  |
|----------------------|--------|--|--------------------|------|------------------------------------------------------------------------|-------------------------------------------------------------------------------------------------------|-----------------------|--------------------|--------|------|----|----|---------------------------------|------------------------|-------------------------------------------------|---------|-----|--------|--|--|-----------------------------------------------------------|-----|------|--------------------------------------------------------|--|
|                      |        |  |                    |      |                                                                        |                                                                                                       |                       |                    |        |      |    |    |                                 |                        |                                                 |         |     |        |  |  | attended the emergency room with nonneurological ailments |     |      |                                                        |  |
| kidney_cancer        | 502480 |  | McLaughlin         | 1992 |                                                                        | All residents of urban Shanghai                                                                       | Shanghai, China       | Case-control       | Both   |      | 35 | 74 | Structured interview            | Incidence              | Cancer registry                                 |         |     |        |  |  | Kidney cancer                                             | 223 | 157  | From the general population of the Shanghai urban area |  |
| fractures            | 261424 |  | Kiel               | 1992 | Framingham Study                                                       | Residents of Framingham, Massachusetts                                                                |                       | Prospective cohort | Female | NA   | 28 | 62 | Questionnaire                   | Incidence              | Hospital records, self-report                   | NA      | 207 | 2673   |  |  | Hip fracture                                              |     |      |                                                        |  |
| lung_cancer          | 355965 |  | Chyou              | 1993 | Honolulu Heart Program                                                 | American men of Japanese ancestry in Oahu                                                             | Hawaii, United States | Prospective cohort | Male   | 22   | 46 | 65 | Administered interview          | Incidence              | Disease surveillance                            |         | 227 | 7733   |  |  | Lung cancer                                               |     |      |                                                        |  |
| stroke               | 334028 |  | Kawachi            | 1993 | Nurses' Health Study                                                   | Female registered nurses                                                                              | United States         | Prospective cohort | Female | 12   | 30 | 55 | Self-administered questionnaire | Incidence or Mortality | Medical records, Autopsy reports, vital records | 1370000 | 448 | 117006 |  |  | Total stroke                                              |     |      |                                                        |  |
| multiple_sclerosis   | 350717 |  | Villard-Mackintosh | 1993 | Oxford FPA study                                                       | Married women                                                                                         | United Kingdom        | Prospective cohort | Female | 23   | 25 | 50 | Questionnaire                   | Onset                  | Clinical records and diagnosis                  | 275867  | 63  |        |  |  | Multiple sclerosis                                        |     |      |                                                        |  |
| rheumatoid_arthritis | 261510 |  | Heliovaara         | 1993 | Social Insurance Institution's Mobile Clinic Health Examination Survey | Urban, rural and factory worker populations of 34 study regions distributed over the whole of Finland | Finland               | Prospective cohort | Both   | 18.6 | 15 | 99 | Mailed questionnaire            | Incidence              | Population register                             | 981184  | 512 | 52809  |  |  | Rheumatoid arthritis                                      |     |      |                                                        |  |
| lung_cancer          | 357757 |  | Risch              | 1993 |                                                                        | Adults in metropolitan Toronto area and St. Catharine's-                                              | Canada                | Case-control       | Both   |      | 30 | 79 | Administered questionnaire      | Incidence              | Clinical records                                |         |     |        |  |  | Lung cancer                                               | 550 | 1100 | Population                                             |  |

|                |        |  |             |      |                                         |                                                       |               |                    |        |    |    |    |                                               |                        |                                                                      |         |      |        |                                                 |     |     |                       |     |
|----------------|--------|--|-------------|------|-----------------------------------------|-------------------------------------------------------|---------------|--------------------|--------|----|----|----|-----------------------------------------------|------------------------|----------------------------------------------------------------------|---------|------|--------|-------------------------------------------------|-----|-----|-----------------------|-----|
|                |        |  |             |      | Niagra Falls region of southern Ontario |                                                       |               |                    |        |    |    |    |                                               |                        |                                                                      |         |      |        |                                                 |     |     |                       |     |
| lung_cancer    | 358161 |  | Brockmoller | 1993 |                                         | Patients from one specialized hospital in Berlin      | Germany       | Case-control       | Both   |    | 32 | 84 | Administered interviews                       | Incidence              | Clinical records                                                     |         |      |        | Lung cancer                                     | 117 | 272 | Hospital              |     |
| stroke         | 358476 |  | Juvela      | 1993 |                                         | Patients at the Helsinki University Hospital          | Finland       | Case-control       | Both   |    | 15 | 60 | Structured administered questionnaire         | Hospitalization        | Medical records                                                      |         |      |        | Aneurysmal subarachnoid hemorrhage              | 278 | 314 | Hospitalized patients |     |
| cvd            | 334028 |  | Kawachi     | 1993 | Nurses' Health Study                    | Female registered nurses                              | United States | Prospective cohort | Female | 12 | 30 | 55 | Self-administered questionnaire               | Incidence or Mortality | Medical records, Autopsy reports, vital records                      | 1370000 | 448  | 117006 | Total stroke                                    |     |     |                       |     |
| cvd            | 309715 |  | Prineas     | 1993 |                                         | Women on Iowa's driver registration list              | United States | Prospective cohort | Female | 4  | 55 | 69 | Mailed questionnaire                          | Mortality              | Vital records                                                        | 114962  | 93   | 41837  | Ischemic heart disease                          |     |     |                       |     |
| cvd            | 359224 |  | Freund      | 1993 | Framingham Cohort                       | Residents of Framingham, Massachusetts                | United States | Prospective cohort | Both   | 34 | 45 | 84 | Self-reported in medical examination          | Incidence or Mortality | Physician review of medical records, hospital records, vital records | 102578  | 1826 | 4503   | Ischemic heart disease; Cardiovascular diseases |     |     |                       |     |
| cvd            | 358476 |  | Juvela      | 1993 |                                         | Patients at the Helsinki University Hospital          | Finland       | Case-control       | Both   | 15 | 60 |    | Structured administered questionnaire         | Hospitalization        | Medical records                                                      |         |      |        | Aneurysmal subarachnoid hemorrhage              | 278 | 314 | Hospitalized patients |     |
| cvd            | 120237 |  | Vogt        | 1993 |                                         | General female population of Pittsburgh, Pennsylvania | United States | Cross-sectional    | Female | 65 | 93 |    | Study of Osteoporotic Fractures Questionnaire | Prevalence             | Biomarker                                                            |         | 82   | 1491   | Peripheral artery disease                       |     |     |                       | 147 |
| bladder_cancer | 502462 |  | Chyou       | 1993 |                                         | American men of                                       | Hawaii        | Prospective cohort | Male   | 22 | 49 | 68 | Interview                                     | Incidence              | Hospital surveillance                                                | 175890  | 96   | 7995   | Bladder cancer                                  |     |     |                       |     |





|                   |        |  |           |      |                                                                             |                                                                                                      |                                               |                     |        |    |    |     |                                        |                        |                                        |         |      |        |                                        |     |                                                                             |                                                                              |  |
|-------------------|--------|--|-----------|------|-----------------------------------------------------------------------------|------------------------------------------------------------------------------------------------------|-----------------------------------------------|---------------------|--------|----|----|-----|----------------------------------------|------------------------|----------------------------------------|---------|------|--------|----------------------------------------|-----|-----------------------------------------------------------------------------|------------------------------------------------------------------------------|--|
|                   |        |  |           |      |                                                                             |                                                                                                      |                                               |                     |        |    |    |     |                                        |                        |                                        |         |      |        |                                        |     | neurological ailments or to neurology clinics with functional CNS pathology |                                                                              |  |
| esophageal_cancer | 309841 |  | Gao       | 1994 |                                                                             | Permanent residents of urban Shanghai                                                                | China                                         | Case-control        | Both   |    | 30 | 74  | Structured, standardized questionnaire | Incidence              | Disease registry                       |         |      |        | Esophageal cancer                      | 556 | 799                                                                         | Population                                                                   |  |
| stomach_cancer    | 340578 |  | Guo       | 1994 |                                                                             | General population without disabilities or cancer residing in four of Linxian county's four communes | China                                         | Nested case-control | Male   |    | 40 | 69  | Interview                              | Incidence              | Physician diagnosis, medical records   |         |      |        | Stomach cancer (cardia and non-cardia) | 539 | 2695                                                                        | Randomly-selected from the remaining study cohort who did not develop cancer |  |
| pancreatic_cancer | 347176 |  | Silverman | 1994 |                                                                             | Residents from Atlanta, GA, Detroit, MI, and New Jersey                                              | United States (Georgia, Michigan, New Jersey) | Case-control        | Both   |    | 30 | 79  | Personal interview                     | Incidence              | Medical records                        |         |      |        | Carcinoma of the pancreas (ICD 157)    | 526 | 2153                                                                        | General population                                                           |  |
| fractures         | 414227 |  | Mallmin   | 1994 |                                                                             | Residents of Uppsala                                                                                 | Sweden                                        | Case-control        | Female |    | 40 | 80  | Mailed questionnaire                   | Incidence              | Radiology reports and casualty reports |         |      |        | Distal forearm fracture                | 367 | 367                                                                         | Population                                                                   |  |
| fractures         | 414229 |  | Cumming   | 1994 |                                                                             | Elderly residents of Sydney                                                                          | Australia                                     | Case-control        | Both   |    | 65 | 100 | Administered questionnaire             | Incidence              | Medical reports                        |         |      |        | Hip fracture                           | 209 | 207                                                                         | Population                                                                   |  |
| cvd               | 282925 |  | Bolinder  | 1994 | Swedish Construction Industry's Organization for Working Environment Safety | Construction industry employees                                                                      | Sweden                                        | Prospective cohort  | Male   | 12 | 35 | 65  | Administered questionnaire             | Mortality              | Vital records                          |         | 1285 | 19426  | Ischemic heart disease; Stroke         |     |                                                                             |                                                                              |  |
| cvd               | 335809 |  | Kawachi   | 1994 | Nurses' Health Study                                                        | Registered female nurses                                                                             | United States                                 | Prospective cohort  | Female | 12 | 30 | 55  | Questionnaire                          | Incidence or Mortality | Self-reported, medical                 | 1370000 | 970  | 121700 | Ischemic heart disease                 |     |                                                                             |                                                                              |  |

|                    |        |  |             |      |                              |                                                                               |                               |                       |      |     |    |    |                               |                              |                               |        |     |       |                         |     |      |                                                                                                                                                                                                          |  |
|--------------------|--------|--|-------------|------|------------------------------|-------------------------------------------------------------------------------|-------------------------------|-----------------------|------|-----|----|----|-------------------------------|------------------------------|-------------------------------|--------|-----|-------|-------------------------|-----|------|----------------------------------------------------------------------------------------------------------------------------------------------------------------------------------------------------------|--|
|                    |        |  |             |      |                              |                                                                               |                               |                       |      |     |    |    |                               | records,<br>vital<br>records |                               |        |     |       |                         |     |      |                                                                                                                                                                                                          |  |
| parkinson          | 173863 |  | Doll        | 1994 | British<br>Doctors'<br>Study | Male<br>doctors who<br>resided in<br>the United<br>Kingdom                    | United<br>Kingdom             | Prospective<br>cohort | Male | 40  | 18 | 99 | Mailed<br>questionnaire       | Mortality                    | Administra<br>tive<br>records |        | 152 | 10812 | Parkinsoni<br>sm        |     |      |                                                                                                                                                                                                          |  |
| parkinson          | 359164 |  | Morano      | 1994 |                              | Mixed urban<br>and rural<br>population<br>in Caceres<br>province of<br>Spain  | Spain                         | Case-control          | Male |     | 18 | 99 | Administered<br>questionnaire | Incidence                    | Medical<br>records            |        |     |       | Parkinson'<br>s disease | 33  | 66   | Subjects<br>presentin<br>g to the<br>emergen<br>cy room<br>because<br>of minor,<br>non-<br>neurologi<br>cal<br>ailments<br>or to<br>neurolog<br>y clinics<br>with<br>functiona<br>l CNS<br>patholog<br>y |  |
| bladder_<br>cancer | 502458 |  | Siemiatycki | 1994 |                              | Resident in<br>the Montreal<br>metrop area                                    | Montreal,<br>Canada           | Case-control          | Male |     | 35 | 70 | Interview or<br>questionnaire | Incidence                    | Biomarker                     |        |     |       | Bladder<br>cancer       | 484 | 2238 | Cancer<br>patients,<br>individua<br>ls from<br>electoral<br>lists in<br>the<br>Montreal<br>area and<br>random<br>digit<br>dialing                                                                        |  |
| kidney_c<br>ancer  | 502441 |  | Mellemgard  | 1994 |                              | All<br>histologicall<br>y verified<br>cases of<br>renal-cell<br>cancer        | Denmark                       | Case-control          | Both |     | 20 | 79 | Structured<br>questionnaire   | Incidence                    | Cancer<br>registry            |        |     |       | Kidney<br>cancer        | 368 | 396  | From the<br>Central<br>Popuatlio<br>n<br>Register                                                                                                                                                        |  |
| fractures          | 261365 |  | Forsen      | 1994 |                              | All residents<br>of Nord-<br>Trondelag<br>invited to a<br>health<br>screening | Nord-<br>Trøndelag,<br>Norway | Prospective<br>cohort | Both | 2.8 | 50 | 99 | Questionnaire                 | Incidence                    | Hospital<br>records           | 108907 | 524 | 38356 | Hip<br>fracture         |     |      |                                                                                                                                                                                                          |  |



|              |        |  |             |      |                                       |                                                                                                                                       |                |                     |        |     |    |    |                                 |           |                                |        |      |       |                                         |     |      |                                        |  |
|--------------|--------|--|-------------|------|---------------------------------------|---------------------------------------------------------------------------------------------------------------------------------------|----------------|---------------------|--------|-----|----|----|---------------------------------|-----------|--------------------------------|--------|------|-------|-----------------------------------------|-----|------|----------------------------------------|--|
| fractures    | 315458 |  | Lobo        | 1994 |                                       | Sample drawn from Zarazoga Dementia and Depression Project                                                                            | Spain          | Prospective cohort  | Both   | 16  | 55 | 99 | Interview                       | Incidence | Disease registry               | 76,848 | 275  | 4803  | Hip fracture                            |     |      |                                        |  |
| fractures    | 261387 |  | Hemenway    | 1994 | Health Professionals Follow-up Study  | Male health professionals 40-75 years of age in 1986                                                                                  | United States  | Prospective cohort  | Male   | 5.4 | 40 | 75 | Questionnaire                   | Incidence | Self-reported                  | 271484 | 67   | 49895 | Hip fracture                            |     |      |                                        |  |
| lung_cancer  | 502458 |  | Siemiatycki | 1994 |                                       | Patients admitted to the hospital with lung cancer at the Graduate Institute of Medical Education and Research (PGIMER), Chandigarh." | Quebec, Canada | case-control        | Male   |     |    |    | administered interview          | Incidence | Hospital records               |        |      |       | lung cancer                             | 146 | 146  | Varied                                 |  |
| ihd          | 356109 |  | Watt        | 1995 | Renfrew/Paisley (MIDSPAN) Study       | Residents of Paisley and Renfrew, Scotland                                                                                            | United Kingdom | Prospective cohort  | Both   | 15  | 45 | 64 | Unspecified                     | Mortality | Vital records                  |        | 1567 | 15411 | Coronary heart disease (ICD 410-414)    |     |      |                                        |  |
| asthma       | 346743 |  | Troisi      | 1995 |                                       | Female registered nurses                                                                                                              | United States  | Prospective cohort  | Female | 10  | 30 | 55 | Self-administered questionnaire | Incidence | Physician diagnosis            | 692423 | 671  | 74072 | Asthma                                  |     |      |                                        |  |
| diabetes     | 348079 |  | Rimm        | 1995 | Health Professionals Follow-up Cohort | Male health professionals in the US                                                                                                   | United States  | Prospective cohort  | Male   | 6   | 40 | 75 | Self-administered questionnaire | Incidence | Self-report, medical records   | 230769 | 509  | 41810 | Non-insulin-dependent diabetes mellitus |     |      |                                        |  |
| liver_cancer | 343580 |  | Siemiatycki | 1995 |                                       | Males residing in the Montreal metropolitan area                                                                                      | Canada         | Case-control        | Male   |     | 35 | 70 | Personal interviews             | Incidence | Histologically confirmed cases |        |      |       | Liver cancer                            | 48  | 2238 | General population and cancer controls |  |
| liver_cancer | 343632 |  | Tanaka      | 1995 |                                       | Cases and controls pooled from three studies in the Fukouka,                                                                          | Japan          | Pooled case-control | Female |     | 35 | 79 | Personal interviews             | Incidence | Physician diagnosed            |        |      |       | Hepatocellular carcinoma                | 120 | 257  | Hospital based                         |  |

|                        |        |  |             |      |                              |                                                                                                        |                                                            |                     |      |   |    |    |                            |           |                                                       |     |  |      |  |                                     |     |      |                                          |
|------------------------|--------|--|-------------|------|------------------------------|--------------------------------------------------------------------------------------------------------|------------------------------------------------------------|---------------------|------|---|----|----|----------------------------|-----------|-------------------------------------------------------|-----|--|------|--|-------------------------------------|-----|------|------------------------------------------|
|                        |        |  |             |      |                              | Saga, and Osaka prefectures                                                                            |                                                            |                     |      |   |    |    |                            |           |                                                       |     |  |      |  |                                     |     |      |                                          |
| nasopharyngeal_cancer  | 346040 |  | Zhu         | 1995 |                              | Men in areas covered by eight cancer registries in the US                                              | United States                                              | Case-control        | Male |   | 15 | 39 | Personal interview         | Incidence | Disease registry                                      |     |  |      |  | Nasopharyngeal cancer               | 113 | 1910 | General population                       |
| lip_oral_cavity_cancer | 348052 |  | Macfarlane  | 1995 |                              | Residents of Beijing city, western New York state and Turin city                                       | China, United States, Italy                                | Pooled case-control | Both |   | 18 | 99 | Subject interview          | Incidence | Histologically-confirmed diagnosis                    |     |  |      |  | Oral cancer                         | 835 | 1300 | Hospital patients and general population |
| pancreatic_cancer      | 346870 |  | Ji          | 1995 |                              | Residents of the 10 urban districts of Shanghai                                                        | Shanghai, China                                            | Case-control        | Both |   | 30 | 74 | Personal interview         | Incidence | Disease registry, histopathologically confirmed cases |     |  |      |  | Pancreatic cancer                   | 451 | 1552 | General population                       |
| kidney_cancer          | 358809 |  | Schlehofer  | 1995 |                              | Residents from the Rhein-Neckar-Odenwald area, cases recruited from 10 urology departments in the area | Germany                                                    | Case-control        | Both |   | 20 | 75 | Personal interviews        | Incidence | Histologically confirmed cases                        |     |  |      |  | Renal cell cancer (ICD 9: 189.0)    | 277 | 286  | General population                       |
| kidney_cancer          | 358812 |  | Muscat      | 1995 |                              | Residents from centers across 4 US states                                                              | United States (Illinois, Michigan, New York, Pennsylvania) | Case-control        | Both |   | 18 | 99 | Administered questionnaire | Incidence | Histologically confirmed cases                        |     |  |      |  | Renal cell carcinoma (ICD 9: 189.0) | 788 | 779  | Hospital patients                        |
| cvd                    | 463522 |  | Wannamethee | 1995 | British Regional Heart Study | Registries of general practices in 24 towns in England, Wales, and Scotland                            | United Kingdom                                             | Prospective cohort  | Male | 8 | 40 | 59 | Administered questionnaire | Mortality | Doctor report, vital records                          | 488 |  | 7735 |  | Ischemic heart disease              |     |      |                                          |
| esophageal_cancer      | 343580 |  | Siemiatycki | 1995 |                              | Males in the Montreal metropolitan area                                                                | Montreal, Canada                                           | Case-control        | Male |   | 35 | 70 | Interview or questionnaire | Incidence | Biomarker                                             |     |  |      |  | Esophageal cancer                   | 99  | 2238 | From electoral lists in the              |

|                         |        |  |             |      |  |                                         |                                                    |              |      |  |    |    |                            |           |                                            |  |  |  |  |                |               |      |                                                                                                                                                                               |  |
|-------------------------|--------|--|-------------|------|--|-----------------------------------------|----------------------------------------------------|--------------|------|--|----|----|----------------------------|-----------|--------------------------------------------|--|--|--|--|----------------|---------------|------|-------------------------------------------------------------------------------------------------------------------------------------------------------------------------------|--|
|                         |        |  |             |      |  |                                         |                                                    |              |      |  |    |    |                            |           |                                            |  |  |  |  |                | Montreal area |      |                                                                                                                                                                               |  |
| stomach_cancer          | 343580 |  | Siemiatycki | 1995 |  | Males in the Montreal metropolitan area | Montreal, Canada                                   | Case-control | Male |  | 35 | 70 | Interview or questionnaire | Incidence | Biomarker                                  |  |  |  |  | stomach cancer | 251           | 2238 | From electoral lists in the Montreal area                                                                                                                                     |  |
| liver_cancer            | 343580 |  | Siemiatycki | 1995 |  | Males in the Montreal metropolitan area | Montreal, Canada                                   | Case-control | Male |  | 35 | 70 | Interview or questionnaire | Incidence | Biomarker                                  |  |  |  |  | Liver cancer   | 48            | 2238 | From electoral lists in the Montreal area                                                                                                                                     |  |
| colon_and_rectum_cancer | 343580 |  | Siemiatycki | 1995 |  | Males in the Montreal metropolitan area | Montreal, Canada                                   | Case-control | Male |  | 35 | 70 | Interview or questionnaire | Incidence | Biomarker                                  |  |  |  |  | Colon cancer   | 505           | 1492 | From electoral lists in the Montreal area                                                                                                                                     |  |
| bladder_cancer          | 343580 |  | Siemiatycki | 1995 |  | Males in the Montreal metropolitan area | Montreal, Canada                                   | Case-control | Male |  | 35 | 70 | Interview or questionnaire | Incidence | Biomarker                                  |  |  |  |  | Bladder cancer | 484           | 2238 | From electoral lists in the Montreal area                                                                                                                                     |  |
| kidney_cancer           | 502478 |  | McLaughlin  | 1995 |  | Patients with renal-cell cancer         | Australia, Denmark, Germany, Sweden, United States | Case-control | Both |  | 20 | 79 | Interview                  | Incidence | Cancer registry and hospitals/pathologists |  |  |  |  | Kidney cancer  | 707           | 992  | From registers covering the entire population (Denmark), electoral rolls (Australia), residential lists (Germany), Health Care Financing Administration lists or random digit |  |

|                   |        |  |             |      |                                          |                                                                                         |                                                                            |                    |        |     |    |     |                                 |                                |                                                      |       |      |       |  |  |                                        |      |      |                                           |  |
|-------------------|--------|--|-------------|------|------------------------------------------|-----------------------------------------------------------------------------------------|----------------------------------------------------------------------------|--------------------|--------|-----|----|-----|---------------------------------|--------------------------------|------------------------------------------------------|-------|------|-------|--|--|----------------------------------------|------|------|-------------------------------------------|--|
|                   |        |  |             |      |                                          |                                                                                         |                                                                            |                    |        |     |    |     |                                 |                                |                                                      |       |      |       |  |  | dialing (United States)                |      |      |                                           |  |
| kidney_cancer     | 343580 |  | Siemiatycki | 1995 |                                          | Males in the Montreal metropolitan area                                                 | Montreal, Canada                                                           | Case-control       | Male   |     | 35 | 70  | Interview or questionnaire      | Incidence                      | Biomarker                                            |       |      |       |  |  | Kidney cancer                          | 177  | 2238 | From electoral lists in the Montreal area |  |
| fractures         | 261418 |  | Cummings    | 1995 |                                          | Women who were able to walk and at least 65 years contacted through mailings lists      | Portland, Oregon, Minneapolis, Baltimore, Monongahela Valley, Pennsylvania | Prospective cohort | Female | 4.1 | 65 | 87  | Questionnaire                   | Incidence                      | Self-report, Radiographs                             | 39016 | 192  | 9516  |  |  | Hip fracture                           |      |      |                                           |  |
| fractures         | 498453 |  | Johnell     | 1995 |                                          | Men and women aged 50 years or over from 14 centers in six countries in Southern Europe | France, Greece, Italy, Portugal, Spain, Turkey                             | Case-control       | Both   |     | 50 | 100 | Standardized interviews         | Incidence                      | Medical reports                                      |       |      |       |  |  | Hip fracture                           | 2086 | 3532 | Population                                |  |
| fractures         | 498446 |  | Tavani      | 1995 |                                          | Postmenopausal women                                                                    | Italy                                                                      | Case-control       | Female |     | 45 | 74  | Standardized interviews         | Incidence                      | Medical reports                                      |       |      |       |  |  | Hip fracture                           | 241  | 719  | Hospital                                  |  |
| lung_cancer       | 343580 |  | Siemiatycki | 1995 |                                          | "Department of Pulmonary Medicine of Post                                               | Quebec, Canada                                                             | case-control       | Male   |     |    |     | administered interview          | Incidence                      | Hospital records                                     |       |      |       |  |  | lung cancer (ICD C33-C34)              | 370  | 370  | Population                                |  |
| pancreatic_cancer | 343580 |  | Seimiatycki | 1995 |                                          |                                                                                         | Quebec, Canada                                                             | case-control       | Male   |     | 35 | 70  | self-report                     | Incidence of pancreatic cancer | Administrative medical records or disease registries |       |      |       |  |  | Pancreatic Cancer                      | 176  | 352  | Population                                |  |
| ihd               | 328472 |  | Yuan        | 1996 |                                          | Male residents of Shanghai                                                              | China                                                                      | Prospective cohort | Male   | 5.4 | 45 | 64  | Structured interviews           | Mortality                      | Vital records                                        |       | 68   | 18244 |  |  | Ischemic heart disease (ICD-9 410-414) |      |      |                                           |  |
| asthma            | 111344 |  | Strachan    | 1996 | British national child development study | All people in England, Scotland, or Wales born during one                               | United Kingdom                                                             | Prospective cohort | Both   | 33  | 17 | 33  | Administered interview by proxy | Incidence                      | Self-reported                                        |       | 2051 | 18559 |  |  | Asthma or wheezing                     |      |      |                                           |  |



|                       |        |  |         |      |                                                              |                   |              |        |  |    |    |                         |                 |                                                                                                         |  |  |  |                                           |     |      |                                                                                                                                                                           |  |
|-----------------------|--------|--|---------|------|--------------------------------------------------------------|-------------------|--------------|--------|--|----|----|-------------------------|-----------------|---------------------------------------------------------------------------------------------------------|--|--|--|-------------------------------------------|-----|------|---------------------------------------------------------------------------------------------------------------------------------------------------------------------------|--|
|                       |        |  |         |      | security health plans                                        |                   |              |        |  |    |    |                         |                 |                                                                                                         |  |  |  | FEV1 < 75%                                |     |      | groups at the hospital: patients with pulmonary tuberculosis, patients with interstitial lung disease, patients with ear, nose, and throat ailments, and healthy visitors |  |
| ihd                   | 357441 |  | Pais    | 1996 | Adults of South Asian descent                                | India             | Case-control | Both   |  | 30 | 60 | Standardized interviews | Hospitalization | ECG results and Clinical diagnosis                                                                      |  |  |  | Acute myocardial infarction               | 200 | 200  | Hospital                                                                                                                                                                  |  |
| liver_cancer          | 293871 |  | Shin    | 1996 | Patients admitted to the Inje University Pusan Paik Hospital | Republic of Korea | Case-control | Both   |  | 18 | 99 | Personal interviews     | Incidence       | Histologically confirmed cases, angiography, liver scanning, tomography, and magnetic resonance imaging |  |  |  | Hepatocellular carcinoma                  | 203 | 406  | Hospital based                                                                                                                                                            |  |
| breast_cancer         | 309776 |  | Morabia | 1996 | General population of Geneva                                 | Switzerland       | Case-control | Female |  | 18 | 74 | Interview               | Incidence       | Cancer Register of Canton Geneva                                                                        |  |  |  | First diagnosis of invasive breast cancer | 244 | 1032 | Female resident of Geneva without previous breast cancer aged 30-74 years                                                                                                 |  |
| nasopharyngeal_cancer | 346032 |  | Vaughan | 1996 | Cases from disease registries in                             | United States     | Case-control | Both   |  | 18 | 74 | Personal interview      | Incidence       | Disease registry                                                                                        |  |  |  | Nasopharyngeal cancer                     | 231 | 244  | General population                                                                                                                                                        |  |

|                   |        |  |           |      |                                                                                  |                          |                    |      |    |    |                            |                         |                                                               |                                                            |        |     |                                                         |                                                                            |     |                                                            |  |  |
|-------------------|--------|--|-----------|------|----------------------------------------------------------------------------------|--------------------------|--------------------|------|----|----|----------------------------|-------------------------|---------------------------------------------------------------|------------------------------------------------------------|--------|-----|---------------------------------------------------------|----------------------------------------------------------------------------|-----|------------------------------------------------------------|--|--|
|                   |        |  |           |      | Washington, Michigan, Connecticut, Iowa, and Utah and randomly selected controls |                          |                    |      |    |    |                            |                         |                                                               |                                                            |        |     | (ICD-O 147)                                             |                                                                            |     |                                                            |  |  |
| pancreatic_cancer | 359139 |  | Lee       | 1996 | Inpatients at the Veterans General Hospital-Taipei                               | Taiwan                   | Case-control       | Both | 18 | 99 | Medical record review      | Incidence               | Clinical records, histological confirmed cases                |                                                            |        |     | Pancreatic cancer                                       | 282                                                                        | 282 | Hospital based                                             |  |  |
| cataracts         | 359121 |  | Phillips  | 1996 | Patients at the Princess Alexandra Eye Pavillion, Edinburgh, UK                  | Scotland, United Kingdom | Case-control       | Both | 10 | 99 | Administered questionnaire | Incidence               | Physician diagnosis                                           |                                                            |        |     | Cataract                                                | 996                                                                        | 996 | Hospital based                                             |  |  |
| peptic_ulcer      | 349377 |  | Wang      | 1996 | Factory workers in Shanghai                                                      | China                    | Case-control       | Both | 18 | 99 | Interview                  | Incidence               | Confirmed by endoscopy or gastrointestinal barium examination |                                                            |        |     | New or recurrent peptic ulcer within the past two years | 500                                                                        | 500 | Randomly chosen among factory workers without peptic ulcer |  |  |
| cvd               | 438147 |  | Iribarren | 1996 | Kaiser Permanente Medical Care Program                                           | United States            | Prospective cohort | Both | 16 | 40 | 89                         | Health examination      | Hospitalization or Mortality                                  | Hospital discharge records, vital records                  |        | 386 | 61756                                                   | Intracerebral hemorrhage                                                   |     |                                                            |  |  |
| cvd               | 464569 |  | Njølstad  | 1996 | Finnmark Study                                                                   | Norway                   | Prospective cohort | Both | 14 | 20 | 49                         | Questionnaire           | Incidence or Mortality                                        | Hospital discharge records, medical records, vital records | 187336 | 241 | 13266                                                   | Stroke; Subarachnoid hemorrhage; Intracerebral hemorrhage; Ischemic stroke |     |                                                            |  |  |
| cvd               | 464576 |  | Haheim    | 1996 | Oslo Study                                                                       | Norway                   | Prospective cohort | Male | 18 | 40 | 49                         | Screening questionnaire | Mortality                                                     | Vital records                                              | 273940 | 85  | 16173                                                   | Stroke                                                                     |     |                                                            |  |  |

|                 |        |  |           |      |                                       |                                                                             |                    |                     |        |      |    |    |                                            |            |                                                              |         |      |        |                                         |      |      |            |     |
|-----------------|--------|--|-----------|------|---------------------------------------|-----------------------------------------------------------------------------|--------------------|---------------------|--------|------|----|----|--------------------------------------------|------------|--------------------------------------------------------------|---------|------|--------|-----------------------------------------|------|------|------------|-----|
| cvd             | 464113 |  | Whisnant  | 1996 |                                       | Residents of Rochester, MN                                                  | United States      | Nested case-control | Both   | 50   | 90 |    | Medical records                            | Incidence  | Disease registry, medical records                            |         |      |        | Ischemic stroke                         | 1444 | 1444 | Population |     |
| cvd             | 465004 |  | Ogren     | 1996 |                                       | Elderly males born in 1914 residing in Malmo                                | Sweden             | Cross-sectional     | Male   | 68   | 68 |    | Questionnaire                              | Prevalence | Biomarker                                                    |         | 55   | 388    | Peripheral artery disease               |      |      |            | 129 |
| fractures       | 261433 |  | Torgerson | 1996 |                                       | Women randomly selected from the community health index                     | Aberdeen, Scotland | Prospective cohort  | Female | 2    | 45 | 49 | Self-administered questionnaire            | Incidence  | Self-report                                                  | 3714    | 44   | 1857   | Fracture                                |      |      |            |     |
| lung_cancer     | 358717 |  | Yong      | 1997 | NHANES I Epidemiologic Followup Study | Sample of the civilian noninstitutionalized population of the United States | United States      | Prospective cohort  | Both   | 22   | 25 | 74 | Administered interviews and questionnaires | Incidence  | Hospital records and death certificates                      | 191292  | 248  | 10068  | Lung cancer (ICD-9 162)                 |      |      |            |     |
| prostate_cancer | 165618 |  | Veierod   | 1997 |                                       | Men screened in three counties                                              | Norway             | Prospective cohort  | Male   | 12.4 | 16 | 56 | Questionnaire                              | Incidence  | Disease registry, vital records                              | 319588  | 72   | 25708  | Prostate cancer                         |      |      |            |     |
| prostate_cancer | 347435 |  | Rodriguez | 1997 | Cancer Prevention Study-II            | Residents with at least one household member over 45 years old              | United States      | Prospective cohort  | Male   | 9    | 30 |    | Self-administered questionnaire            | Mortality  | Vital records                                                | 3928139 | 1748 | 450279 | Prostate cancer                         |      |      |            |     |
| ihd             | 328274 |  | Chen      | 1997 |                                       | Factory workers in Shanghai                                                 | China              | Prospective cohort  | Male   | 16   | 35 | 64 | Standardized interview                     | Mortality  | Factory records, vital records, hospital records, interviews | 101949  | 69   | 9351   | Coronary heart disease (ICD-9 410-414)  |      |      |            |     |
| diabetes        | 309588 |  | Kawakami  | 1997 |                                       | Male employees of a large electrical company in Japan                       | Japan              | Prospective cohort  | Male   | 8    | 18 | 53 | Self-administered questionnaire            | Incidence  | Physician diagnosis                                          | 18375   | 41   | 2312   | Non-insulin-dependent diabetes mellitus |      |      |            |     |



|                   |        |  |          |      |                                             |                                                                                                  |                     |                    |        |      |    |     |                                 |                       |                                                                                 |        |     |       |                                                          |      |      |            |  |
|-------------------|--------|--|----------|------|---------------------------------------------|--------------------------------------------------------------------------------------------------|---------------------|--------------------|--------|------|----|-----|---------------------------------|-----------------------|---------------------------------------------------------------------------------|--------|-----|-------|----------------------------------------------------------|------|------|------------|--|
| pancreatic_cancer | 346828 |  | Harnack  | 1997 | Iowa Women's Health Study (IWHS)            | Postmenopausal women in Iowa                                                                     | Iowa, United States | Prospective cohort | Female | 9    | 55 | 69  | Self-administered questionnaire | Incidence & Mortality | Vital records, disease registry                                                 | 291598 | 66  | 33976 | Pancreatic cancer                                        |      |      |            |  |
| cataracts         | 261527 |  | Hiller   | 1997 | Framingham Eye Study                        | Surviving members of the Framingham Eye Study I and II                                           | United States       | Prospective cohort | Both   | 12.5 | 52 | 80  | Personal examination            | Incidence             | Physician diagnosis                                                             |        | 251 | 660   | Nuclear, Cortical and Posterior-subcapsular lens opacity |      |      |            |  |
| peptic_ulcer      | 349381 |  | Aldoori  | 1997 | Health Professionals Follow-up Study (HPFS) | Male health professionals who resided in the fifty US states                                     | United States       | Prospective cohort | Male   | 5.5  | 40 | 75  | Baseline survey questionnaire   | Incidence             | Self-administered follow-up questionnaire, medical records                      | 261165 | 138 | 47806 | Duodenal ulcer                                           |      |      |            |  |
| prostate_cancer   | 165518 |  | Cerhan   | 1997 | Iowa 65+ Rural Health Study                 | Noninstitutionalized residents age 65 years old or older of Iowa and Washington counties in Iowa | United States       | Prospective cohort | Male   | 8.1  | 65 | 101 | Interview                       | Incidence             | State Health Agency of Iowa's cancer database                                   | 8474   | 71  | 1050  | Prostate cancer                                          |      |      |            |  |
| lung_cancer       | 298142 |  | Dosemeci | 1997 |                                             | Non-civil servant employees                                                                      | Turkey              | Case-control       | Male   |      | 18 | 99  | Administrative medical records  | Incidence             | Administrative medical records                                                  |        |     |       | Lung cancer                                              | 1210 | 2039 | Clinic     |  |
| lung_cancer       | 357367 |  | Jockel   | 1997 |                                             | Patients and population controls from Bremen and Frankfurt/Main                                  | Germany             | Case-control       | Both   |      | 33 | 80  | Administered interview          | Incidence             | Clinical records of histologically or cytologically confirmed cancerous lesions |        |     |       | Lung cancer                                              | 1004 | 2008 | Population |  |
| lung_cancer       | 357404 |  | Pawlega  | 1997 |                                             | Male lung cancer patients and adults in the electoral roll                                       | Poland              | Case-control       | Male   |      | 30 | 99  | Self-administered questionnaire | Incidence             | Disease registry of histologically confirmed cases                              |        |     |       | Lung cancer                                              | 176  | 517  | Population |  |

|                  |        |  |          |      |  |                                                                                                          |                           |                     |        |    |    |     |                                            |           |                                          |  |  |  |                                                                    |     |      |                                                 |
|------------------|--------|--|----------|------|--|----------------------------------------------------------------------------------------------------------|---------------------------|---------------------|--------|----|----|-----|--------------------------------------------|-----------|------------------------------------------|--|--|--|--------------------------------------------------------------------|-----|------|-------------------------------------------------|
| lung_cancer      | 357437 |  | Barbone  | 1997 |  | Adults in the province of Trieste                                                                        | Italy                     | Case-control        | Male   |    | 36 | 98  | Structured interview                       | Mortality | Autopsy reports                          |  |  |  | Lung cancer                                                        | 755 | 755  | Population                                      |
| lung_cancer      | 419671 |  | Hu       | 1997 |  | hospital-based cases and controls from Heilongjiang Province in China                                    | Heilongjiang, China       | Case-control        | Both   |    | 18 | 99  | Administered interviews and questionnaires | Incidence | Histological confirmed cases             |  |  |  | Lung cancer                                                        | 227 | 454  | Hospital                                        |
| laryngeal_cancer | 298142 |  | Dosemeci | 1997 |  | Employees in the Marmara region, except for civil servants                                               | Turkey                    | Case-control        | Male   |    | 18 | 99  | Standardized admission form                | Incidence | Patient records, Histologic confirmation |  |  |  | Laryngeal cancer                                                   | 832 | 829  | Cancer patients unrelated to smoking or alcohol |
| fractures        | 414223 |  | Mortiz   | 1997 |  | White and Black women in New York City or Philadelphia                                                   | United States             | Case-control        | Female |    | 45 | 103 | Standardized interviews                    | Incidence | Radiology reports                        |  |  |  | Hip fracture                                                       | 425 | 766  | Hospital and Community                          |
| cvd              | 429870 |  | Ross     | 1997 |  | Male residents from Shanghai                                                                             | China                     | Nested case-control | Male   | 45 | 64 |     | Interview                                  | Mortality | Vital records                            |  |  |  | Stroke                                                             | 245 | 1225 | Cohort population                               |
| cvd              | 464302 |  | Kubota   | 1997 |  | Patients from 48 hospitals around Japan                                                                  | Japan                     | Case-control        | Both   | 31 | 76 |     | Self-administered questionnaire            | Incidence | Clinical records                         |  |  |  | Subarachnoid hemorrhage; Intracerebral hemorrhage; Ischemic stroke | 502 | 502  | Hospital                                        |
| cvd              | 464726 |  | You      | 1997 |  | Patients from Austin, Royal Melbourne, Box Hill, Preston, and Northcote community hospitals in Melbourne | Australia                 | Case-control        | Both   | 15 | 60 |     | Interview                                  | Incidence | Clinical diagnosis                       |  |  |  | Ischemic stroke                                                    | 201 | 201  | Population                                      |
| cvd              | 464839 |  | Lee      | 1997 |  | Subjects recruited from the                                                                              | United Kingdom (Scotland) | Nested case-control | Both   | 55 | 74 |     | Self-administered-questionnaire            | Incidence | Vital records,                           |  |  |  | Aortic aneurysm                                                    | 40  | 200  | Population                                      |

|                        |        |  |          |      |                                                                                                                   |                     |                           |      |    |    |    |                                 |                                        |                                                      |        |     |       |                                       |     |     |                                                                                                                     |  |
|------------------------|--------|--|----------|------|-------------------------------------------------------------------------------------------------------------------|---------------------|---------------------------|------|----|----|----|---------------------------------|----------------------------------------|------------------------------------------------------|--------|-----|-------|---------------------------------------|-----|-----|---------------------------------------------------------------------------------------------------------------------|--|
|                        |        |  |          |      | Edinburgh Artery Study                                                                                            |                     |                           |      |    |    |    |                                 | medical records                        |                                                      |        |     |       |                                       |     |     |                                                                                                                     |  |
| lip_oral_cavity_cancer | 343432 |  | Zheng T  | 1997 | cases presenting between 1988 to 1989 to a hospital in the Beijing area                                           | China               | case-control              | Both |    | 20 | 80 | self-report                     | histologically confirmed tongue cancer | Administrative medical records or disease registries |        |     |       | Lip and Oral Cavity Cancer            | 159 | 348 | population                                                                                                          |  |
| bladder_cancer         | 502393 |  | Yu       | 1997 | Patients who received surgery for tumour removal and patients with non-urinary system and non-neoplastic diseases | Heilongjiang, China | Case-control              | Both |    | 20 | 99 | Interview                       | Incidence                              | Biomarker                                            |        |     |       | Bladder cancer                        | 127 | 254 | Patients with non-urinary system and non-neoplastic diseases                                                        |  |
| fractures              | 498367 |  | Grisso   | 1997 | Men aged 45 years and older with a radiologically confirmed diagnosis of a first hip fracture                     | United States       | Case-control              | Male |    | 45 | 99 | Administered questionnaire      | Incidence                              | Medical reports                                      |        |     |       | Hip fracture                          | 356 | 402 | Men randomly selected from lists of enrollees in the Kaiser Permanente Medical Care program of Northern California. |  |
| lung_cancer            | 328266 |  | Liaw     | 1998 | 12-Year Follow-Up Study<br>Adult residents of study townships and precincts                                       | Taiwan              | Prospective cohort        | Both | 12 | 41 | 99 | Administered interview          | Mortality                              | Vital records                                        | 140493 | 127 | 14397 | Trachea, bronchus, and lung cancer    |     |     |                                                                                                                     |  |
| stroke                 | 344345 |  | Prescott | 1998 | Copenhagen City Heart Study; Glostrup Population Studies;<br>Adults in the Copenhagen area                        | Denmark             | Pooled prospective cohort | Both | 30 | 20 | 99 | Self-administered questionnaire | Mortality                              | Vital records                                        | 453000 | 548 | 30809 | Cerebrovascular disease (ICD 430-438) |     |     |                                                                                                                     |  |





|                      |        |  |            |      |                                                                                                                                                             |               |              |        |  |    |    |                   |           |                                     |  |  |  |                                                                 |      |      |                                                                                                                                                  |  |
|----------------------|--------|--|------------|------|-------------------------------------------------------------------------------------------------------------------------------------------------------------|---------------|--------------|--------|--|----|----|-------------------|-----------|-------------------------------------|--|--|--|-----------------------------------------------------------------|------|------|--------------------------------------------------------------------------------------------------------------------------------------------------|--|
|                      |        |  |            |      |                                                                                                                                                             |               |              |        |  |    |    |                   |           |                                     |  |  |  |                                                                 |      |      | tobacco smoking and/or alcohol, diagnosed with a disease not related to the digestive tract, and be in the same age range as the cases           |  |
| breast_cancer        | 310463 |  | Gammon     | 1998 | General population of five counties in central New Jersey, three-county area surrounding Seattle, Washington, and the metropolitan area of Atlanta, Georgia | United States | Case-control | Female |  | 18 | 54 | Interview         | Incidence | Physician diagnosis                 |  |  |  | In situ and invasive breast cancer                              | 1497 | 1645 | Selected by random digit dialing and matched with cases by age group and geographic area                                                         |  |
| other_pharynx_cancer | 343450 |  | De Stefani | 1998 | Residents of Montevideo, Uruguay                                                                                                                            | Uruguay       | Case-control | Male   |  | 25 | 84 | Subject interview | Incidence | Microscopically-confirmed diagnosis |  |  |  | Paryngeal cancer (oropharynx, hypopharynx, pharynx unspecified) | 219  | 427  | Patients from the same hospitals who were diagnosed with diseases unrelated to tobacco smoking and/or alcohol intake, who have no non-neoplastic |  |

|                        |        |  |            |      |                                                          |                                                                                            |                 |                           |      |      |    |    |                                 |                                 |                                                      |  |      |       |                            |     |     |                                                                                    |  |
|------------------------|--------|--|------------|------|----------------------------------------------------------|--------------------------------------------------------------------------------------------|-----------------|---------------------------|------|------|----|----|---------------------------------|---------------------------------|------------------------------------------------------|--|------|-------|----------------------------|-----|-----|------------------------------------------------------------------------------------|--|
|                        |        |  |            |      |                                                          |                                                                                            |                 |                           |      |      |    |    |                                 |                                 |                                                      |  |      |       |                            |     |     | lesions of the oral cavity and pharynx, who are in the same age range as the cases |  |
| cvd                    | 464556 |  | Prescott   | 1998 | Copenhagen City Heart Study; Glostrup Population Studies | Residents of central Copenhagen, Copenhagen suburbs, and 14 large workspaces in Copenhagen | Denmark         | Pooled prospective cohort | Both | 12.3 | 20 | 93 | Self-administered questionnaire | Hospitalization or Mortality    | Hospital discharge records, national health database |  | 1763 | 24663 | Ischemic heart disease     |     |     |                                                                                    |  |
| cvd                    | 464945 |  | Adlerberth | 1998 | Multifactorial Primary Prevention Trial                  | Male residents of Goteborg born between 1915 and 1925, except those born in 1923           | Sweden          | Prospective cohort        | Male | 16   | 51 | 59 | Postal questionnaire            | Mortality                       | Vital records                                        |  | 1725 | 7100  | Ischemic heart disease     |     |     |                                                                                    |  |
| cvd                    | 464095 |  | Feigin     | 1998 |                                                          | Residents of the district of Novosibirsk Russian population                                | Russia          | Case-control              | Both | 50   | 90 |    | Interview                       | Incidence                       | Disease registry, vital records, clinical records    |  |      |       | Ischemic stroke            | 237 | 237 | Population                                                                         |  |
| cvd                    | 465267 |  | Hooi       | 1998 |                                                          | General population of the province of Limburg                                              | The Netherlands | Cross-sectional           | Both | 40   | 78 |    | Self-administered questionnaire | Prevalence                      | Biomarker                                            |  | 458  | 3650  | Peripheral artery disease  |     |     |                                                                                    |  |
| lip_oral_cavity_cancer | 502352 |  | Su, WZ     | 1998 |                                                          | patients diagnosed with squamous cell carcinoma between March, 1989 and September,         | China           | case-control              | Male |      | 27 | 82 | self-report                     | incidence of oral cavity cancer | Physician diagnosis                                  |  |      |       | Lip and Oral Cavity Cancer | 101 | 101 | population                                                                         |  |

|                 |        |  |           |      |                                                                                        |                                                                                         |                                                                            |                    |      |      |    |     |                                            |                        |                                                  |       |      |       |                        |     |     |                                           |  |
|-----------------|--------|--|-----------|------|----------------------------------------------------------------------------------------|-----------------------------------------------------------------------------------------|----------------------------------------------------------------------------|--------------------|------|------|----|-----|--------------------------------------------|------------------------|--------------------------------------------------|-------|------|-------|------------------------|-----|-----|-------------------------------------------|--|
|                 |        |  |           |      | 1995<br>Affiliated<br>Stomatologi<br>cal Hospital<br>of China<br>Medical<br>University |                                                                                         |                                                                            |                    |      |      |    |     |                                            |                        |                                                  |       |      |       |                        |     |     |                                           |  |
| bladder_ cancer | 502429 |  | Taylor    | 1998 |                                                                                        | Hospital patients                                                                       | United States                                                              | Case-control       | Both |      | 25 | 94  | Structured interview                       | Incidence              | Biomarker                                        |       |      |       | Bladder cancer         | 230 | 203 | Hospital patients                         |  |
| fractures       | 261411 |  | Mussolino | 1998 | National Health and Nutrition Examination Survey (NHANES) III                          | National probability sample of the civilian noninstitutionalized population             | United States                                                              | Prospective cohort | Both | 13.9 | 45 | 74  | Questionnaire                              | Incidence or Mortality | Hospital records and death certificates          | 39914 | 61   | 2808  | Hip fracture           |     |     |                                           |  |
| fractures       | 261426 |  | Elmståhl  | 1998 | Malmö "Diet and Cancer study"                                                          | 6576 men, aged 46–68 years, living in the city of Malmö; in the southern part of Sweden | Malmö, Sweden                                                              | Prospective cohort | Male | 2.4  | 46 | 68  | Questionnaire                              | Incidence              | Hospital records                                 | 15782 | 160  | 6576  | Fracture               |     |     |                                           |  |
| fractures       | 498427 |  | Clark     | 1998 |                                                                                        | Men and women from two major hospitals in Mexico City                                   | Mexico                                                                     | Case-control       | Both |      | 45 | 100 | Administered questionnaire                 | Incidence              | Radiology reports                                |       |      |       | Hip fracture           | 152 | 143 | Healthy controls in hospital waiting room |  |
| lung_ cancer    | 334460 |  | Nordlund  | 1999 | Swedish prospective cohort                                                             | Adults in the Swedish population register                                               | Sweden                                                                     | Prospective cohort | Both | 26   | 18 | 69  | Administered interviews and questionnaires | Incidence              | Disease registry and vital records               |       | 345  | 41710 | Lung cancer            |     |     |                                           |  |
| ihd             | 165539 |  | Jacobs    | 1999 | The Seven Countries Study                                                              | Men in 16 cohorts in 7 countries                                                        | United States; Finland; Netherlands; Italy; Croatia; Serbia; Greece; Japan | Prospective cohort | Male | 25   | 40 | 59  | Standardized questionnaire                 | Mortality              | Medical records, vital records, proxy interviews |       | 1827 | 12763 | Coronary heart disease |     |     |                                           |  |
| stroke          | 334731 |  | Hart      | 1999 | Renfrew/Paisley Study                                                                  | Residents of Renfrew and Paisley in Scotland                                            | United Kingdom                                                             | Prospective cohort | Both | 20   | 45 | 64  | Self-administered questionnaire            | Mortality              | Vital records                                    |       | 689  | 15406 | Stroke                 |     |     |                                           |  |



|                 |        |             |      |                                          |                                                                                                                |                                                                            |                    |        |     |    |    |                                 |                       |                                                  |        |       |                                                                                         |                                       |  |  |  |  |
|-----------------|--------|-------------|------|------------------------------------------|----------------------------------------------------------------------------------------------------------------|----------------------------------------------------------------------------|--------------------|--------|-----|----|----|---------------------------------|-----------------------|--------------------------------------------------|--------|-------|-----------------------------------------------------------------------------------------|---------------------------------------|--|--|--|--|
| stroke          | 165539 | Jacobs      | 1999 | The Seven Countries Study                | Men in 16 cohorts in 7 countries                                                                               | United States; Finland; Netherlands; Italy; Croatia; Serbia; Greece; Japan | Prospective cohort | Male   | 25  | 40 | 59 | Standardized questionnaire      | Mortality             | Medical records, vital records, proxy interviews | 797    | 12763 | Stroke                                                                                  |                                       |  |  |  |  |
| diabetes        | 348081 | Uchimoto    | 1999 | Osaka Health Survey                      | Male employees of a company in Osaka, Japan                                                                    | Osaka, Japan                                                               | Prospective cohort | Male   | 16  | 35 | 60 | Self-administered questionnaire | Incidence             | Physician diagnosis                              | 60904  | 450   | 6250                                                                                    | Type 2 diabetes mellitus              |  |  |  |  |
| lbp             | 348204 | Feldman     | 1999 |                                          | High school students in grades 7 to 9 in Montreal, Quebec                                                      | Canada                                                                     | Prospective cohort | Both   | 1   | 13 | 15 | Self-administered questionnaire | Incidence             | Self-administered questionnaire                  | 65     | 377   | Low back pain occurring at a frequency of at least once a week within the past 6 months |                                       |  |  |  |  |
| prostate_cancer | 347458 | Giovannucci | 1999 | Health Professionals Follow-up Study     | United States male dentists, optometrists, osteopaths, podiatrists, pharmacists, and veterinarians             | United States                                                              | Prospective cohort | Male   | 7.4 | 40 | 75 | Self-administered questionnaire | Incidence & Mortality | Self-report, proxy report, medical reports       | 351261 | 1369  | 47781                                                                                   | Non-stage A1 cases of prostate cancer |  |  |  |  |
| fractures       | 261429 | Kato        | 1999 | New York University Women's Health Study | Post-menopausal women that received a mammographic screening in New York City or Florida between 1985 and 1991 | United States                                                              | Prospective cohort | Female | 8.6 | 34 | 65 | Self-administered questionnaire | Incidence             | Self-reported                                    | 1025   | 6250  | Fracture                                                                                |                                       |  |  |  |  |

|                 |        |  |           |      |  |                                                                                       |                         |                     |        |   |    |    |                                             |                              |                                                 |  |    |      |                                             |      |      |                    |  |
|-----------------|--------|--|-----------|------|--|---------------------------------------------------------------------------------------|-------------------------|---------------------|--------|---|----|----|---------------------------------------------|------------------------------|-------------------------------------------------|--|----|------|---------------------------------------------|------|------|--------------------|--|
| lung_cancer     | 357792 |  | Band      | 1999 |  | Male cancer patients                                                                  | Canada                  | Nested case-control | Male   |   | 20 | 99 | Self-administered questionnaire             | Incidence                    | Disease registry                                |  |    |      | Lung cancer (ICD-9 162)                     | 2998 | 7265 | Disease registry   |  |
| lung_cancer     | 419696 |  | Armadans  | 1999 |  | Hospital-based cases and controls from a public teaching hospital in Barcelona, Spain | Spain                   | Case-control        | Male   |   | 30 | 79 | Administered interviews and questionnaires  | Incidence                    | Histologically or cytologically confirmed cases |  |    |      | Lung cancer                                 | 325  | 650  | Hospital           |  |
| prostate_cancer | 347464 |  | Parker    | 1999 |  | Iowa residents                                                                        | United States           | Prospective cohort  | Male   | 9 | 40 | 86 | Mailed questionnaire or telephone interview | Incidence                    | Disease registry                                |  | 81 | 1177 | Prostate cancer                             |      |      |                    |  |
| ihd             | 357274 |  | Dunn      | 1999 |  | Participants of the MICA study                                                        | United Kingdom          | Case-control        | Female |   | 16 | 44 | Interviews                                  | Hospitalization or Mortality | Hospital records, vital records                 |  |    |      | Incident myocardial infarction              | 448  | 1728 | Community          |  |
| ihd             | 357952 |  | Rosenberg | 1999 |  | Subscribers of Essence magazine                                                       | United States           | Case-control        | Female |   | 21 | 69 | Self-administered questionnaire             | Incidence                    | Self-reported, medical records                  |  |    |      | Coronary heart disease                      | 352  | 1760 | Population         |  |
| ihd             | 358066 |  | Bosetti   | 1999 |  | Patients in Italian coronary care unit network                                        | Italy                   | Pooled case-control | Both   |   | 18 | 74 | Administered questionnaire                  | Hospitalization              | Clinical diagnosis                              |  |    |      | First non-fatal acute myocardial infarction | 1230 | 1839 | Hospital           |  |
| stroke          | 357417 |  | Bonita    | 1999 |  | Residents of the Auckland region                                                      | New Zealand             | Case-control        | Both   |   | 35 | 74 | Administered questionnaire                  | Incidence                    | Disease registry                                |  |    |      | First acute stroke                          | 521  | 1851 | Population survey  |  |
| stroke          | 358462 |  | Thrift    | 1999 |  | Residents and patients of the Melbourn metropolitan area                              | Australia               | Case-control        | Both   |   | 18 | 80 | Structured administered questionnaire       | Incidence                    | Vital records, Medical records                  |  |    |      | First intracerebral hemorrhage              | 331  | 331  | Population         |  |
| lri             | 355112 |  | Almirall  | 1999 |  | Residents of Maresme county in Barcelona                                              | Spain                   | Case-control        | Both   |   | 15 | 75 | Administered questionnaire                  | Incidence                    | Radiological diagnosis                          |  |    |      | Pneumonia                                   | 205  | 475  | General population |  |
| aortic_aneurism | 350128 |  | Wilmink   | 1999 |  | Men over the age of 50 in Huntingdon, UK                                              | England, United Kingdom | Nested case-control | Male   |   | 50 | 89 | Self-administered questionnaire             | Incidence                    | Physician diagnosis                             |  |    |      | Abdominal aortic aneurysm                   | 210  | 237  | General population |  |

|                       |        |  |            |      |                           |                                                                |                                                                            |                     |        |    |    |    |                                       |           |                                                       |  |      |       |                                |                                |      |                    |  |  |
|-----------------------|--------|--|------------|------|---------------------------|----------------------------------------------------------------|----------------------------------------------------------------------------|---------------------|--------|----|----|----|---------------------------------------|-----------|-------------------------------------------------------|--|------|-------|--------------------------------|--------------------------------|------|--------------------|--|--|
| laryngeal_cancer      | 343375 |  | Schlecht   | 1999 |                           | Residents of three metropolitan centres of southern Brazil     | Brazil                                                                     | Case-control        | Both   |    | 15 | 84 | Blinded histological questionnaire    | Incidence | Histological confirmation                             |  |      |       | Laryngeal cancer               | 194                            | 361  | Hospital-based     |  |  |
| cervical_cancer       | 347864 |  | Ylitalo    | 1999 |                           | Female residents of Uppsala county                             | Sweden                                                                     | Nested case-control | Female |    | 25 | 49 | Structured phone questionnaire        | Incidence | Disease registry                                      |  |      |       | Cervical carcinoma in situ     | 422                            | 422  | Cytology register  |  |  |
| nasopharyngeal_cancer | 346047 |  | Cheng      | 1999 |                           | Residents recruited from hospitals and the community in Taipei | Taiwan                                                                     | Case-control        | Both   |    | 15 | 74 | Self-administered questionnaire       | Incidence | Histologically confirmed cases                        |  |      |       | Nasopharyngeal carcinoma       | 375                            | 327  | General population |  |  |
| cvd                   | 165539 |  | Jacobs     | 1999 | The Seven Countries Study | Men in 16 cohorts in 7 countries                               | United States; Finland; Netherlands; Italy; Croatia; Serbia; Greece; Japan | Prospective cohort  | Male   | 25 | 40 | 59 | Standardized questionnaire            | Mortality | Medical records, vital records, proxy interviews      |  | 2624 | 12763 |                                | Coronary heart disease, Stroke |      |                    |  |  |
| cvd                   | 358462 |  | Thrift     | 1999 |                           | Residents and patients of the Melbourne metropolitan area      | Australia                                                                  | Case-control        | Both   | 18 | 80 |    | Structured administered questionnaire | Incidence | Vital records, Medical records                        |  |      |       | First intracerebral hemorrhage | 331                            | 331  | Population         |  |  |
| cvd                   | 294121 |  | Huhtasaari | 1999 |                           | Male residents in the two northernmost counties in Sweden      | Sweden                                                                     | Case-control        | Male   | 25 | 64 |    | Interview                             | Incidence | Discharge records, physician diagnosis, vital records |  |      |       | Ischemic heart disease         | 687                            | 687  | Population         |  |  |
| cvd                   | 389100 |  | You        | 1999 |                           | Patients from 3 hospitals in Victoria, Australia               | Australia                                                                  | Case-control        | Both   | 30 | 88 |    | Interview                             | Incidence | Medical diagnosis                                     |  |      |       | Ischemic stroke                | 452                            | 452  | Population         |  |  |
| cvd                   | 463869 |  | Connelly   | 1999 |                           | Residents of New York                                          | United States                                                              | Case-control        | Both   | 25 | 99 |    | Interview                             | Incidence | Clinical diagnosis                                    |  |      |       | Subarachnoid hemorrhage        | 342                            | 1188 | Population         |  |  |

|                |        |  |             |      |                      |                                                                                                         |                                                                          |                    |        |     |    |    |                            |           |                                |           |     |         |                                                        |      |      |                                                                                                                                        |
|----------------|--------|--|-------------|------|----------------------|---------------------------------------------------------------------------------------------------------|--------------------------------------------------------------------------|--------------------|--------|-----|----|----|----------------------------|-----------|--------------------------------|-----------|-----|---------|--------------------------------------------------------|------|------|----------------------------------------------------------------------------------------------------------------------------------------|
| bladder_cancer | 502413 |  | Fortuny     | 1999 |                      | Hospital patients                                                                                       |                                                                          | Case-control       | Both   |     | NA | NA | Questionnaire              | Incidence | Physician diagnosis            |           |     |         | Bladder cancer                                         | 146  | 3366 | Individuals from the same study center (general population and hospitals)                                                              |
| fractures      | 261498 |  | Cornuz      | 1999 | Nurse's Health Study | Female registered nurses 30-55 years of age in 1976                                                     | United States                                                            | Prospective cohort | Female | 12  | 30 | 55 | Questionnaire              | Incidence | Self-report                    | 1,320,000 | 377 | 121,701 | Hip fracture                                           |      |      |                                                                                                                                        |
| fractures      | 261381 |  | Burger      | 1999 | Rotterdam Study      | All 10,275 inhabitants of Ommord, a district in Rotterdam, the Netherlands, were invited to participate | Ommoord, Rotterdam, Netherlands                                          | Prospective cohort | Both   | 3.8 | 55 | 99 | Interview                  | Incidence | Medical records                | 19790     | 50  | 5208    | Hip fracture                                           |      |      |                                                                                                                                        |
| fractures      | 498392 |  | Michaëlsson | 1999 |                      | a large population-based case-control study in Swedish women                                            | Stockholm, Uppsala, Västermanland, Örebro, Göteborg and Malmöhus, Sweden | case-control       | Female |     | 51 | 80 | Questionnaire              | Incidence | Medical reports                |           |     |         | Hip fracture, Cervical fracture, trochanteric fracture | 1610 | 4059 | Controls were native-born women randomly selected from the national, continuously updated population register in the counties included |
| fractures      | 498396 |  | Melhus      | 1999 |                      | Women who were residents in Sweden                                                                      | Sweden                                                                   | Case-control       | Female |     | 40 | 76 | Questionnaire              | Incidence | Self-report                    |           |     |         | Hip fracture                                           | 247  | 783  | Population                                                                                                                             |
| Iri            | 298305 |  | Baik        | 2000 |                      | Male health professionals and female registered nurses                                                  | United States                                                            | Prospective cohort | Both   | 8   | 27 | 79 | Administered questionnaire | Incidence | Medical records, vital records |           | 595 | 104491  | Pneumonia                                              |      |      |                                                                                                                                        |

|                   |        |  |           |      |                          |                                                                                                                                      |               |                    |        |      |      |      |                                 |                           |                                                 |        |     |       |                                                            |     |     |            |  |
|-------------------|--------|--|-----------|------|--------------------------|--------------------------------------------------------------------------------------------------------------------------------------|---------------|--------------------|--------|------|------|------|---------------------------------|---------------------------|-------------------------------------------------|--------|-----|-------|------------------------------------------------------------|-----|-----|------------|--|
| diabetes          | 348083 |  | Manson    | 2000 | Physicians' Health Study | US male physicians                                                                                                                   | United States | Prospective cohort | Male   | 12   | 40   | 84   | Self-administered questionnaire | Incidence                 | Self-report                                     | 255830 | 770 | 21068 | Type 2 diabetes mellitus                                   |     |     |            |  |
| diabetes          | 348085 |  | Nakanishi | 2000 |                          | Japanese male office workers at T corporation in Osaka, Japan                                                                        | Osaka, Japan  | Prospective cohort | Male   | 5    | 35   | 59   | Self-administered questionnaire | Incidence                 | Physician diagnosis                             | 5937   | 54  | 1266  | Type 2 diabetes                                            |     |     |            |  |
| prostate_cancer   | 165571 |  | Putnam    | 2000 |                          | Iowa residents                                                                                                                       | United States | Prospective cohort | Male   | 9    | 40   | 86   | Mailed questionnaire            | Incidence                 | Disease registry                                | 9509   | 101 | 1572  | Prostate cancer                                            |     |     |            |  |
| pancreatic_cancer | 346832 |  | Nilson    | 2000 |                          | Residents in the Nord-Trondelag county in Norway                                                                                     | Norway        | Prospective cohort | Both   | 9.8  | 30   | 99   | Self-administered questionnaire | Incidence                 | Disease registry                                | 622721 | 166 | 63374 | Pancreatic cancer                                          |     |     |            |  |
| prostate_cancer   | 347448 |  | Lotufo    | 2000 | Physicians' Health Study | US male physicians with no history of myocardial infarction, stroke, transient ischemic attack, or cancer (except non-melanoma skin) | United States | Prospective cohort | Male   | 12.5 | 40   | 84   | Self-administered questionnaire | Incidence & Mortality     | Self-report, proxy report, National Death Index | 260926 | 996 | 21985 | Prostate cancer                                            |     |     |            |  |
| prostate_cancer   | 359212 |  | Lund      | 2000 |                          | All residents aged 20 years or more in the county of Nord-Trondelag                                                                  | Norway        | Prospective cohort | Male   | 9.3  | 49.2 | 96.2 | Mailed questionnaire            | Incidence                 | Cancer Registry of Norway                       | 212720 | 644 | 22895 | Prostate cancer                                            |     |     |            |  |
| fractures         | 132098 |  | Huopio    | 2000 |                          | Female residents of Kuopio Province                                                                                                  | Finland       | Prospective cohort | Female | 3.6  | 47   | 56   | Questionnaire                   | Incidence                 | Self-reported, radiological reports             |        | 257 | 3068  | Fracture (except for those due to motor vehicle accidents) |     |     |            |  |
| lung_cancer       | 286844 |  | Dikshit   | 2000 |                          | Males in Bhopal                                                                                                                      | India         | Case-control       | Male   |      | 18   | 99   | Administered questionnaire      | Incidence                 | Disease registry                                |        |     |       | Lung cancer                                                | 163 | 423 | Population |  |
| ihd               | 357413 |  | Miyake    | 2000 |                          | Residents/patients of Fukuoka City and                                                                                               | Japan         | Case-control       | Both   |      | 40   | 79   | Administered questionnaire      | Non-fatal hospitalization | Clinical diagnosis by collaboration             |        |     |       | Non-fatal acute myocardial infarction                      | 384 | 656 | Population |  |



|                       |        |  |        |      |                                     |                                                                                                                                                  |                 |                     |      |    |    |                      |                        |                               |                                                             |  |       |        |      |  |                                                                               |     |      |                                   |
|-----------------------|--------|--|--------|------|-------------------------------------|--------------------------------------------------------------------------------------------------------------------------------------------------|-----------------|---------------------|------|----|----|----------------------|------------------------|-------------------------------|-------------------------------------------------------------|--|-------|--------|------|--|-------------------------------------------------------------------------------|-----|------|-----------------------------------|
|                       |        |  |        |      |                                     | with the same catchment area as the hospitals from which the cases were selected; cases and controls were restricted to residents of Moscow city |                 |                     |      |    |    |                      |                        |                               |                                                             |  |       |        |      |  | hospitals without cancer or gastrointestinal diseases                         |     |      |                                   |
| nasopharyngeal_cancer | 346049 |  | Yuan   | 2000 |                                     | Patients identified from the Shanghai Cancer Registry and controls randomly selected from the urban Shanghai population                          | Shanghai, China | Case-control        | Both |    | 15 | 74                   | Personal interview     | Incidence                     | Histologically confirmed cases, disease registry            |  |       |        |      |  | Nasopharyngeal carcinoma                                                      | 935 | 1032 | General population                |
| prostate_cancer       | 359218 |  | Nomura | 2000 |                                     | Japanese-American men on the Hawaiian island of Oahu                                                                                             | United States   | Nested case-control | Male |    | 45 | 68                   | Interview              | Incidence                     | Hospital discharge records, Hawaii Tumor Registry           |  |       |        |      |  | Prostate cancer                                                               | 249 | 249  | Cohort members who were not cases |
| cvd                   | 463446 |  | Thun   | 2000 | Cancer Prevention Study II (CPS-II) | Nationwide residents                                                                                                                             | United States   | Prospective cohort  | Both | 6  | 30 | Postal questionnaire | Mortality              | Direct inquiry, vital records |                                                             |  | 23738 | 974150 |      |  | Ischemic heart disease; Other cardiovascular and circulatory diseases; Stroke |     |      |                                   |
| cvd                   | 463455 |  | Takagi | 2000 |                                     | Residents of two rural communities of Hokkaido                                                                                                   | Japan           | Prospective cohort  | Both | 18 | 40 | 64                   | Administered interview | Mortality                     | Familial reporting, public health reporting, vital records, |  |       |        | 1996 |  | Cardiovascular diseases                                                       |     |      |                                   |









|                      |        |  |               |      |  |                                                                                                |                           |                     |      |  |    |    |                                                 |           |                                                  |  |  |  |                                                                      |      |      |                                                                                                                       |  |
|----------------------|--------|--|---------------|------|--|------------------------------------------------------------------------------------------------|---------------------------|---------------------|------|--|----|----|-------------------------------------------------|-----------|--------------------------------------------------|--|--|--|----------------------------------------------------------------------|------|------|-----------------------------------------------------------------------------------------------------------------------|--|
|                      |        |  |               |      |  |                                                                                                |                           |                     |      |  |    |    |                                                 |           |                                                  |  |  |  |                                                                      |      |      | deceased cases                                                                                                        |  |
| parkinson            | 359160 |  | Paganini-Hill | 2001 |  | Residents who owned homes in the Leisure World Laguna Hills retirement community in California | United States             | Nested case-control | Both |  | 55 | 99 | Mailed questionnaire                            | Incidence | Self-report, medical records, death certificates |  |  |  | Parkinson's disease                                                  | 201  | 1210 | Portion of cohort who were not cases                                                                                  |  |
| multiple_sclerosis   | 369019 |  | Ghadirian     | 2001 |  | Residents of greater Montreal area                                                             | Canada                    | Case-control        | Both |  | 1  | 99 | Administered questionnaire                      | Incidence | Diagnosis                                        |  |  |  | Multiple sclerosis                                                   | 200  | 202  | Population                                                                                                            |  |
| esophageal_cancer    | 345324 |  | Matsuo        | 2001 |  | Patients at the Aichi Cancer Center                                                            | Japan                     | Case-control        | Both |  | 40 | 76 | Self-administered                               | Incidence | Clinical diagnosis                               |  |  |  | Esophageal cancer                                                    | 102  | 241  | Outpatients                                                                                                           |  |
| other_pharynx_cancer | 343434 |  | Zavras        | 2001 |  | Residents of metropolitan Athens and Attica                                                    | Greece                    | Case-control        | Both |  | 22 | 91 | Subject interview                               | Incidence | Primary histopathologically-confirmed diagnosis  |  |  |  | Oral and pharyngeal cancer (ICD-9 141, 143-145, 148-149)             | 110  | 115  | Patients from the same hospitals who were hospitalized for conditions unrelated to cancer or who were trauma patients |  |
| bladder_cancer       | 343155 |  | Chiu          | 2001 |  | Residents of Iowa                                                                              | Iowa, USA                 | Case-control        | Both |  | 40 | 85 | Mailed questionnaire and/or telephone interview | Incidence | Disease registry                                 |  |  |  | Kidney cancer adenocarcinomas, excluding cancers of the renal pelvis | 1406 | 2336 | Population                                                                                                            |  |
| kidney_cancer        | 343155 |  | Chiu          | 2001 |  | Residents of Iowa                                                                              | Iowa, United States       | Case-control        | Both |  | 40 | 85 | Self-administered questionnaire                 | Incidence | Disease registry                                 |  |  |  | Kidney cancer                                                        | 406  | 2434 | General population                                                                                                    |  |
| kidney_cancer        | 358814 |  | Semenza       | 2001 |  | Residents from Orange                                                                          | California, United States | Case-control        | Both |  | 20 | 74 | Personal interviews                             | Incidence | Disease registry, histologica                    |  |  |  | Renal cell carcinoma                                                 | 115  | 259  | General population                                                                                                    |  |



|                |        |  |                |      |                 |                                                                                                                 |                                            |                    |      |    |    |    |                            |                        |                              |  |      |       |                                 |      |      |                                                                                                                                                                                                                                                                                                    |
|----------------|--------|--|----------------|------|-----------------|-----------------------------------------------------------------------------------------------------------------|--------------------------------------------|--------------------|------|----|----|----|----------------------------|------------------------|------------------------------|--|------|-------|---------------------------------|------|------|----------------------------------------------------------------------------------------------------------------------------------------------------------------------------------------------------------------------------------------------------------------------------------------------------|
| bladder_cancer | 502403 |  | Geoffroy-Perez | 2001 |                 | Patients from seven hospitals                                                                                   | France                                     | Case-control       | Male |    | 45 | 75 | Structured interview       | Incidence              | Physician diagnosis          |  |      |       | Bladder cancer                  | 602  | 615  | Hospital patients with other diagnoses excluding cancer                                                                                                                                                                                                                                            |
| fractures      | 498389 |  | Lau            | 2001 |                 | Men and women who were 50 years and older and who were admitted with a diagnosis of hip fracture were recruited | Malaysia, Philippines, Singapore, Thailand | Case-control       | Both |    | 50 | 99 | Administered questionnaire | Incidence              | Self-report                  |  |      |       | Hip fracture                    | 1176 | 1162 | In Malaysia, subjects presenting in general practice clinics for minor ailments were used. In the Philippines, subjects seen by doctors in outreach health programs were used. In Thailand, neighborhood controls were used. In Singapore, community controls were recruited by household surveys. |
| ihd            | 336682 |  | Jonsdottir     | 2002 | Reykjavik Study | Residents of Reykjavik                                                                                          | Iceland                                    | Prospective cohort | Both | 28 | 30 | 84 | Administered questionnaire | Incidence or Mortality | Medical records, hospitaliza |  | 2406 | 98569 | Non-fatal myocardial infarction |      |      |                                                                                                                                                                                                                                                                                                    |

|                   |        |  |           |      |                                                                       |                                                                                                                                                                                      |                            |                    |      |      |    |    |                                 |                                              |                                          |          |      |                                     |                                        |  |  |  |  |
|-------------------|--------|--|-----------|------|-----------------------------------------------------------------------|--------------------------------------------------------------------------------------------------------------------------------------------------------------------------------------|----------------------------|--------------------|------|------|----|----|---------------------------------|----------------------------------------------|------------------------------------------|----------|------|-------------------------------------|----------------------------------------|--|--|--|--|
|                   |        |  |           |      |                                                                       |                                                                                                                                                                                      |                            |                    |      |      |    |    |                                 | tion records, vital records, autopsy reports |                                          |          |      | or coronary death (ICD-9 410-414.9) |                                        |  |  |  |  |
| ihd               | 343310 |  | Prescott  | 2002 | Copenhagen City Heart Study                                           | Residents of study area in Copenhagen                                                                                                                                                | Denmark                    | Prospective cohort | Both | 22   | 30 | 99 | Self-administered questionnaire | Incidence or Mortality                       | Vital records, discharge records         |          | 1348 | 12149                               | Myocardial infarction (ICD-10 I21-I22) |  |  |  |  |
| stroke            | 324092 |  | Klatsky   | 2002 |                                                                       | Members of a pre-paid healthcare system                                                                                                                                              | United States              | Prospective cohort | Both | 18   | 18 | 99 | Questionnaire                   | Hospitalization or Mortality                 | Medical records, vital records           |          | 431  | 128934                              | Hemorrhagic stroke                     |  |  |  |  |
| stomach_cancer    | 340582 |  | Chao      | 2002 | Cancer Prevention Study (CPS) II                                      | Individuals at least 30 years of age and living in a household with one person at least 45 years of age in all 50 states of the United States, District of Columbia, and Puerto Rico | United States, Puerto Rico | Prospective cohort | Both | 13.2 | 30 | 99 | Self-administered questionnaire | Mortality                                    | Death certificates, National Death Index | 13893594 | 1505 | 1055841                             | Stomach cancer (ICD-9 151.0-151.9)     |  |  |  |  |
| pancreatic_cancer | 346876 |  | Lin       | 2002 | Japan Collaborative Cohort Study for Evaluation of Cancer Risk (JACC) | Residents from 45 areas throughout Japan                                                                                                                                             | Japan                      | Prospective cohort | Male | 8.1  | 40 | 79 | Self-administered questionnaire | Mortality                                    | Vital records                            | 807407   | 225  | 110792                              | Pancreatic cancer (ICD-10, C25)        |  |  |  |  |
| cataracts         | 261496 |  | Weintraub | 2002 |                                                                       | Female registered nurses and male health professionals from all 50 states                                                                                                            | United States              | Prospective cohort | Both | 8.8  | 30 | 75 | Self-administered questionnaire | Incidence                                    | Medical records, physician diagnosis     | 1038493  | 4281 | 117731                              | Cataract extraction                    |  |  |  |  |
| lbp               | 348202 |  | Tubach    | 2002 | GAZEL cohort                                                          | Workers from the French national                                                                                                                                                     | France                     | Prospective cohort | Both | 7    | 35 | 50 | Self-administered questionnaire | Incidence                                    | Self-administered                        |          | 416  | 2205                                | Low back pain in the past year         |  |  |  |  |

|             |        |  |            |      |                                                                                             |                                          |                     |        |    |    |     |                                            |                        |                                                                          |  |  |      |                         |                                                                     |      |                                                              |  |  |
|-------------|--------|--|------------|------|---------------------------------------------------------------------------------------------|------------------------------------------|---------------------|--------|----|----|-----|--------------------------------------------|------------------------|--------------------------------------------------------------------------|--|--|------|-------------------------|---------------------------------------------------------------------|------|--------------------------------------------------------------|--|--|
|             |        |  |            |      | electricity and gas company in which there positions were highly exposed to physical stress |                                          |                     |        |    |    |     |                                            | questionnaire          |                                                                          |  |  |      |                         |                                                                     |      |                                                              |  |  |
| lung_cancer | 419717 |  | Kubik      | 2002 | Hospital-based cases and controls from Prague University                                    | Czechia                                  | Case-control        | Female |    | 25 | 89  | Administered interviews and questionnaires | Incidence              | Microscopically verified cases                                           |  |  |      | Lung cancer             | 269                                                                 | 1348 | Case contacts                                                |  |  |
| tb          | 348046 |  | Kolappan   | 2002 | 30 villages from two areas of Tiruvallur district of Tamil Nadu                             | India                                    | Nested case-control | Male   |    | 20 | 50  | Interview                                  | Incidence              | Biomarker                                                                |  |  |      | Tuberculosis            | 85                                                                  | 459  | Subjects who were screened and declared free of tuberculosis |  |  |
| cvd         | 336682 |  | Jonsdottir | 2002 | Reykjavik Study                                                                             | Iceland                                  | Prospective cohort  | Both   | 28 | 30 | 84  | Administered questionnaire                 | Incidence or Mortality | Medical records, hospitalization records, vital records, autopsy reports |  |  | 2406 | 98569                   | Non-fatal myocardial infarction or coronary death (ICD-9 410-414.9) |      |                                                              |  |  |
| cvd         | 328257 |  | Lam        | 2002 | Retired military cadres in Xi'an                                                            | China                                    | Prospective cohort  | Male   | 12 | 66 | 105 | Standardized administered questionnaire    | Mortality              | Hospital death certificates                                              |  |  | 66   | 807                     | Cardiovascular diseases; Ischemic heart disease; Stroke             |      |                                                              |  |  |
| cvd         | 463932 |  | Isaksen    | 2002 | Residents of Tromso, Norway                                                                 | Norway                                   | Case-control        | Both   | 26 | 80 |     | Structured questionnaire                   | Incidence              | Discharge records, disease registry, medical records                     |  |  |      | Subarachnoid hemorrhage | 26                                                                  | 104  | Population                                                   |  |  |
| cvd         | 463953 |  | Moons      | 2002 | Participants recruited from three European                                                  | Finland; The Netherlands; United Kingdom | Nested case-control | Male   | 42 | 99 |     | Structured questionnaire                   | Incidence              | Clinical diagnosis, disease registry,                                    |  |  |      | Stroke                  | 219                                                                 | 479  | Cohort population                                            |  |  |







|                   |        |  |           |      |  |                                                                                                      |                |                     |      |  |    |    |                                 |                 |                                  |  |  |  |                                                        |      |      |                                          |  |
|-------------------|--------|--|-----------|------|--|------------------------------------------------------------------------------------------------------|----------------|---------------------|------|--|----|----|---------------------------------|-----------------|----------------------------------|--|--|--|--------------------------------------------------------|------|------|------------------------------------------|--|
|                   |        |  |           |      |  |                                                                                                      |                |                     |      |  |    |    |                                 |                 |                                  |  |  |  | (ICD-8 532), gastro-duodenal ulcer (ICD-8 533)         |      |      |                                          |  |
| ihd               | 357453 |  | Piegas    | 2003 |  | Adults in 51 cities                                                                                  | Bazil          | Case-control        | Both |  | 40 | 99 | Administered questionnaire      | Hospitalization | Clinical diagnosis, test results |  |  |  | ST-segment elevation acute myocardial infarction       | 1279 | 1279 | Hospital                                 |  |
| stroke            | 344340 |  | Broderick | 2003 |  | Patients in 44 hospitals                                                                             | United States  | Case-control        | Both |  | 18 | 49 | Administered questionnaire      | Incidence       | Medical diagnosis                |  |  |  | Symptomatic aneurysmal subarachnoid hemorrhagic stroke | 312  | 618  | Population                               |  |
| liver_cancer      | 343586 |  | Matsuo    | 2003 |  | Residents in either the Fukouka or Saga Prefecture. Community controls were residents of Kurume City | Fukouka, Japan | Case-control        | Both |  | 40 | 80 | Personal interviews             | Incidence       | Medical records                  |  |  |  | Hepatocellular carcinoma                               | 222  | 548  | General population and hospital controls |  |
| liver_cancer      | 343588 |  | Munaka    | 2003 |  | Patients and controls from the University of Occupational and Environmental Health Hospital in Japan | Fukouka, Japan | Case-control        | Both |  | 34 | 92 | Administered questionnaire      | Incidence       | Medical records                  |  |  |  | Hepatocellular carcinoma                               | 78   | 138  | Hospital based                           |  |
| pancreatic_cancer | 346137 |  | Inoue     | 2003 |  | Cancer and cancer-free outpatients of the Aichi Cancer Center Hospital                               | Japan          | Nested case-control | Both |  | 30 | 89 | Self-administered questionnaire | Incidence       | Disease registry                 |  |  |  | Pancreatic cancer                                      | 200  | 2000 | Hospital based                           |  |

|           |        |  |           |      |                                         |                                                                                                      |                              |                    |        |      |    |    |                            |                        |                                                    |        |      |       |                                                                  |     |     |                         |  |
|-----------|--------|--|-----------|------|-----------------------------------------|------------------------------------------------------------------------------------------------------|------------------------------|--------------------|--------|------|----|----|----------------------------|------------------------|----------------------------------------------------|--------|------|-------|------------------------------------------------------------------|-----|-----|-------------------------|--|
| cvd       | 332104 |  | Shaper    | 2003 | British Regional Heart Study            | Male patients in a general practice in 24 towns                                                      | United Kingdom               | Prospective cohort | Male   | 21.8 | 40 | 59 | Administered questionnaire | Incidence or Mortality | Medical records, self-reported, vital records      |        | 1573 | 7735  | Myocardial infarction, Sudden cardiac death, Major stroke events |     |     |                         |  |
| cvd       | 344318 |  | Kurth     | 2003 | Women's Health Study                    | Female health professionals                                                                          | United States                | Prospective cohort | Female | 9    | 45 | 99 | Postal questionnaire       | Incidence or Mortality | Medical records, vital records                     | 354899 | 70   | 39783 | Hemorrhagic stroke                                               |     |     |                         |  |
| cvd       | 350749 |  | Kurth     | 2003 | Physicians' Health Study                | US male physicians                                                                                   | United States                | Prospective cohort | Male   | 17.8 | 40 | 84 | Postal questionnaire       | Incidence or Mortality | Self-reported, medical records, familial reporting | 385419 | 1069 | 22022 | Total stroke (ischemic, hemorrhagic, unknown)                    |     |     |                         |  |
| cvd       | 344340 |  | Broderick | 2003 |                                         | Patients in 44 hospitals                                                                             | United States                | Case-control       | Both   | 18   | 49 |    | Administered questionnaire | Incidence              | Medical diagnosis                                  |        |      |       | Symptomatic aneurysmal subarachnoid hemorrhagic stroke           | 312 | 618 | Population              |  |
| cvd       | 463924 |  | Ohkuma    | 2003 |                                         | Patients recruited from Aomori prefecture                                                            | Japan                        | Case-control       | Both   | 32   | 85 |    | Structured questionnaire   | Incidence              | Clinical diagnosis                                 |        |      |       | Subarachnoid hemorrhage                                          | 390 | 390 | Hospital                |  |
| cvd       | 464293 |  | Okamoto   | 2003 |                                         | Patients from 2 hospitals in Nagoya, Aichi Prefecture                                                | Japan                        | Case-control       | Both   | 30   | 79 |    | Interview                  | Incidence              | Clinical records                                   |        |      |       | Subarachnoid hemorrhage                                          | 195 | 390 | Hospital and population |  |
| fractures | 498391 |  | Roy       | 2003 | European Prospective Osteoporosis Study | In brief, subjects aged 50–79 years were recruited from population registers in 36 European centers. | Multiple countries in Europe | Prospective cohort | Both   | 3.8  | 50 | 79 | Questionnaire              | Incidence              | Medical reports, Physician Diagnosis               | 24985  | 193  | 6575  | Vertebral fracture                                               |     |     |                         |  |

|             |        |  |            |      |                                    |                                                                                                                  |                        |                    |        |      |    |    |                                 |                        |                                                                                                                    |        |      |       |                        |     |     |          |  |
|-------------|--------|--|------------|------|------------------------------------|------------------------------------------------------------------------------------------------------------------|------------------------|--------------------|--------|------|----|----|---------------------------------|------------------------|--------------------------------------------------------------------------------------------------------------------|--------|------|-------|------------------------|-----|-----|----------|--|
| lung_cancer | 502460 |  | Chan-Yeung | 2003 |                                    | lung cancer patients from the Aichi Cancer Center, National Nagoya Hospital, and Nagoya First Red Cross Hospital | Hong Kong, China       | case-control       | Both   |      | 25 | 90 | self-administered questionnaire | Incidence              | Histological confirmed cases                                                                                       |        |      |       | lung cancer            | 282 | 389 | Varied   |  |
| lung_cancer | 502421 |  | Kreuzer    | 2003 |                                    | residents of north eastern poland                                                                                | Germany                | case-control       | Female |      | 18 | 75 | administered interview          | Incidence              | Histological confirmed cases                                                                                       |        |      |       | lung cancer            | 187 | 691 | Varied   |  |
| lung_cancer | 450624 |  | Zatloukal  | 2003 |                                    | Women's Health Initiative Studies                                                                                | Prague, Czech Republic | case-control       | Female |      | 25 | 89 | administered interview          | Incidence              | Histological confirmed cases                                                                                       |        |      |       | lung cancer            | 334 | 578 | Hospital |  |
| lung_cancer | 358563 |  | Nishino    | 2004 | Miyagi Prefectural Cancer Registry | Residents in 14 municipalities of Miyagi Prefecture                                                              | Japan                  | Prospective cohort | Male   | 7    | 40 | 64 | Self-administered questionnaire | Incidence              | Clinical records, radiology and pathology records, autopsy records, mass screening records, and death certificates | 166804 | 141  | 22836 | Lung cancer            |     |     |          |  |
| ihd         | 174238 |  | Doll       | 2004 | British Doctors' Study             | Male doctors residing in the UK                                                                                  | United Kingdom         | Prospective cohort | Male   | 50   | 18 | 99 | Self-administered questionnaire | Mortality              | Professional records, vital records                                                                                |        | 7628 | 34439 | Ischemic heart disease |     |     |          |  |
| stroke      | 331710 |  | Ueshima    | 2004 | NIPPON DATA80                      | Japanese households                                                                                              | Japan                  | Prospective cohort | Both   | 14   | 30 | 99 | Self-administered questionnaire | Mortality              | Vital records                                                                                                      | 118044 | 203  | 9638  | Stroke                 |     |     |          |  |
| stroke      | 332100 |  | Mannami    | 2004 | JPHC Study Cohort I                | Individuals registered in 14 administrative districts                                                            | Japan                  | Prospective cohort | Male   | 11   | 40 | 59 | Self-administered questionnaire | Incidence or Mortality | Medical records, vital records                                                                                     | 217151 | 702  | 19782 | Stroke                 |     |     |          |  |
| stroke      | 412060 |  | Ueshima    | 2004 | NIPPON DATA80                      | Household members aged 30 years or                                                                               | Japan                  | Prospective cohort | Both   | 13.2 | 30 | 99 | Self-administered questionnaire | Mortality              | Vital records                                                                                                      | 118044 | 203  | 10546 | Stroke (ICD-9 430-438) |     |     |          |  |



|        |        |  |           |      |                                                              |                        |                     |        |  |    |    |                                 |                           |                                         |  |  |  |                                 |     |      |                                                                                                                                         |  |
|--------|--------|--|-----------|------|--------------------------------------------------------------|------------------------|---------------------|--------|--|----|----|---------------------------------|---------------------------|-----------------------------------------|--|--|--|---------------------------------|-----|------|-----------------------------------------------------------------------------------------------------------------------------------------|--|
|        |        |  |           |      | North Yorkshire and North Cumbria                            |                        |                     |        |  |    |    |                                 |                           |                                         |  |  |  |                                 |     |      |                                                                                                                                         |  |
| ihd    | 309729 |  | Tavani    | 2004 | Hospitals in Northern Italy                                  | Italy                  | Pooled case-control | Female |  | 18 | 79 | Structured interviews           | Incidence                 | Medical records                         |  |  |  | Acute myocardial infarction     | 558 | 1044 | Hospital                                                                                                                                |  |
| ihd    | 357373 |  | Ismail    | 2004 | Young South Asian adults from Karachi                        | Pakistan               | Case-control        | Both   |  | 15 | 45 | Standardized questionnaire      | Non-fatal hospitalization | Hospital records                        |  |  |  | Non-fatal myocardial infarction | 193 | 193  | Population                                                                                                                              |  |
| stroke | 343300 |  | Anderson  | 2004 | Residents of Adelaide, Hobart, Perth, and Auckland           | Australia; New Zealand | Case-control        | Both   |  | 15 | 99 | Structured in-person interview  | Incidence                 | Medical records                         |  |  |  | Subarachnoid hemorrhage         | 432 | 473  | Population                                                                                                                              |  |
| stroke | 357435 |  | Hajat     | 2004 | Residents of South London                                    | United Kingdom         | Case-control        | Both   |  | 45 | 74 | Medical records, self-reported  | Incidence                 | Disease registry                        |  |  |  | First ischemic stroke           | 664 | 716  | Population                                                                                                                              |  |
| tb     | 298335 |  | Crampin   | 2004 | Population of Karongo District                               | Malawi                 | Case-control        | Male   |  | 15 | 99 | Interview                       | Incidence                 | Medical records, self-report, biomarker |  |  |  | Tuberculosis                    | 157 | 373  | Randomly selected in the population and matched with cases                                                                              |  |
| tb     | 348044 |  | Ariyothai | 2004 | Population with access to health services at Taksin Hospital | Thailand               | Case-control        | Both   |  | 15 | 99 | Interview                       | Incidence                 | Physician diagnosis, biomarker          |  |  |  | New pulmonary tuberculosis      | 100 | 100  | Non-tuberculosis case attending the outpatient department for medical check-up or inpatient department with no evidence of lung disease |  |
| asthma | 346730 |  | Piipari   | 2004 | Adults living in the Pirkanmaa                               | Finland                | Case-control        | Both   |  | 21 | 63 | Self-administered questionnaire | Incidence                 | Physician diagnosis                     |  |  |  | Asthma                          | 521 | 932  | General population                                                                                                                      |  |

|                |        |  |          |      |                                       |                                                                                                       |                        |                           |      |      |    |     |                                               |                        |                                                |         |     |       |  |                                |       |       |                                                                   |  |
|----------------|--------|--|----------|------|---------------------------------------|-------------------------------------------------------------------------------------------------------|------------------------|---------------------------|------|------|----|-----|-----------------------------------------------|------------------------|------------------------------------------------|---------|-----|-------|--|--------------------------------|-------|-------|-------------------------------------------------------------------|--|
|                |        |  |          |      | Hospital District in southern Finland |                                                                                                       |                        |                           |      |      |    |     |                                               |                        |                                                |         |     |       |  |                                |       |       |                                                                   |  |
| cvd            | 329007 |  | Wen      | 2004 |                                       | Residents of northern, central, and southern Taiwan, and civil service employees and teachers         | Taiwan                 | Pooled prospective cohort | Both | 9    | 35 | 108 | Interview and self-administered questionnaire | Mortality              | Vital records                                  |         | 413 | 86580 |  | Ischemic heart disease; Stroke |       |       |                                                                   |  |
| cvd            | 343300 |  | Anderson | 2004 |                                       | Residents of Adelaide, Hobart, Perth, and Auckland                                                    | Australia; New Zealand | Case-control              | Both | 15   | 99 |     | Structured in-person interview                | Incidence              | Medical records                                |         |     |       |  | Subarachnoid hemorrhage        | 432   | 473   | Population                                                        |  |
| cvd            | 357435 |  | Hajat    | 2004 |                                       | Residents of South London                                                                             | United Kingdom         | Case-control              | Both | 45   | 74 |     | Medical records, self-reported                | Incidence              | Disease registry                               |         |     |       |  | First ischemic stroke          | 664   | 716   | Population                                                        |  |
| cvd            | 463885 |  | Tan      | 2004 |                                       | Patients admitted to the First Department of Neurology of the Chang Hung Memorial Hospital, Kaohsiung | Taiwan                 | Case-control              | Both | 39   | 85 |     | Interview                                     | Incidence              | Clinical diagnosis, medical records            |         |     |       |  | Ischemic stroke                | 228   | 228   | Hospital                                                          |  |
| cvd            | 464712 |  | Yusuf    | 2004 |                                       | Patients recruited from 262 centers from 52 countries                                                 | Multi-location         | Case-control              | Both | 18   | 99 |     | Structured questionnaire                      | Incidence              | Hospital admission records                     |         |     |       |  | Ischemic heart disease         | 15152 | 14820 | Hospital and population                                           |  |
| bladder_cancer | 502417 |  | Sun      | 2004 | Shanghai Cohort Study                 | Chinese adults in Shanghai                                                                            | Shanghai, China        | Prospective cohort        | Male | 12.8 | 45 | 64  | Structured interview                          | Incidence or Mortality | Re-contacts of participants and death registry | 233,482 | 61  | 18244 |  | Bladder cancer                 |       |       |                                                                   |  |
| bladder_cancer | 502423 |  | Hung     | 2004 |                                       | Male residents of Brescia                                                                             | Brescia, Italy         | Case-control              | Male |      | 40 | 80  | Structured interview                          | Incidence              | Physician diagnosis, biomarker                 |         |     |       |  | Bladder cancer                 | 201   | 214   | Patients admitted to the hospitals with urological non-neoplastic |  |

|                |        |  |          |      |  |                                                              |                         |              |      |  |    |    |                                 |           |                                |  |  |  |                |                                                                                                                                                                                                          |      |                                                                                                 |  |
|----------------|--------|--|----------|------|--|--------------------------------------------------------------|-------------------------|--------------|------|--|----|----|---------------------------------|-----------|--------------------------------|--|--|--|----------------|----------------------------------------------------------------------------------------------------------------------------------------------------------------------------------------------------------|------|-------------------------------------------------------------------------------------------------|--|
|                |        |  |          |      |  |                                                              |                         |              |      |  |    |    |                                 |           |                                |  |  |  |                | diseases, including hydronephrosis, urolithiasis, malformative urological diseases, prostatic adenoma and hypertrophy, urological traumas, orchiepididymitis, hydrocele and unspecified urinary symptoms |      |                                                                                                 |  |
| bladder_cancer | 502444 |  | Quirk    | 2004 |  | Adult patients admitted to the Roswell Park Cancer Institute | New York, United States | Case-control | Both |  | 19 | 94 | Self-administered questionnaire | Incidence | Physician diagnosis, biomarker |  |  |  | Bladder cancer | 499                                                                                                                                                                                                      | 1922 | Patients at Roswell Park Cancer Institute who were discharged without a diagnosis of malignancy |  |
| bladder_cancer | 502425 |  | Gaertner | 2004 |  | Cases from provincial cancer registries                      | Canada                  | Case-control | Both |  | 20 | 74 | Mailed questionnaires           | Incidence | Cancer registry                |  |  |  | Bladder cancer | 887                                                                                                                                                                                                      | 2847 | General population in Newfoundland and Alberta                                                  |  |



|             |        |  |               |      |                                                                |                                                                                                         |                                 |                           |        |     |    |    |                                 |                        |                  |         |      |        |                                                                     |  |  |  |  |
|-------------|--------|--|---------------|------|----------------------------------------------------------------|---------------------------------------------------------------------------------------------------------|---------------------------------|---------------------------|--------|-----|----|----|---------------------------------|------------------------|------------------|---------|------|--------|---------------------------------------------------------------------|--|--|--|--|
| fractures   | 165283 |  | Johansson     | 2004 |                                                                | Randomly selected residents                                                                             | Sheffield, United Kingdom       | Prospective cohort        | Female | 3   | 75 | 99 | Interview                       | Incidence              | Self-report      | 6723    | 282  | 2113   | Fracture                                                            |  |  |  |  |
| fractures   | 414212 |  | van der Klift | 2004 | Rotterdam Study                                                | All 10,275 inhabitants of Ommord, a district in Rotterdam, the Netherlands, were invited to participate | Ommoord, Rotterdam, Netherlands | Prospective cohort        | Both   | 6.3 | 55 | 99 | Interview; clinical examination | Incidence              | Clinic visit     | 26,561  | 157  | 4216   | Vertebral fracture                                                  |  |  |  |  |
| lung_cancer | 250095 |  | Marugame      | 2005 | Three-Prefecture Cohort Study                                  | Adults in Miyagi, Aichi, and Osaka                                                                      | Japan                           | Prospective cohort        | Both   | 10  | 40 | 80 | Self-administered questionnaire | Mortality              | Disease registry | 748935  | 598  | 88153  | Lung cancer                                                         |  |  |  |  |
| copd        | 315813 |  | Johannessen   | 2005 | Hordaland County Study                                         | General adult population of the county of Hordaland                                                     | Norway                          | Prospective cohort        | Both   | 9   | 18 | 74 | Mailed questionnaire            | Incidence              | Biomarker        |         | 40   | 908    | COPD                                                                |  |  |  |  |
| ihd         | 236194 |  | Bjartveit     | 2005 |                                                                | Residents of Oslo and three Norwegian counties                                                          | Norway                          | Prospective cohort        | Both   | 30  | 35 | 49 | Self-administered questionnaire | Mortality              | Vital records    | 1087107 | 2253 | 42722  | Ischemic heart disease (ICD-9 410-414; ICD-10 I20-I25)              |  |  |  |  |
| ihd         | 336801 |  | Woodward      | 2005 | Asia Pacific Cohort Studies Collaboration                      | Varied Asian and Australasian populations                                                               | Multi-country                   | Pooled prospective cohort | Both   | 6.8 | 20 | 99 | Self-reported                   | Incidence or Mortality | Unspecified      | 3000000 | 3976 | 562338 | Coronary heart disease (ICD 410-414)                                |  |  |  |  |
| stroke      | 331371 |  | Iso           | 2005 | Japan Collaborative Cohort Study for Evaluation of Cancer Risk | Residents of 45 study areas                                                                             | Japan                           | Prospective cohort        | Both   | 9.9 | 40 | 79 | Self-administered questionnaire | Mortality              | Vital records    | 212219  | 698  | 94683  | Total stroke                                                        |  |  |  |  |
| stroke      | 336801 |  | Woodward      | 2005 | Asia Pacific Cohort Studies Collaboration                      | Varied Asian and Australasian populations                                                               | Multi-country                   | Pooled prospective cohort | Both   |     | 20 | 99 | Self-reported                   | Incidence or Mortality | Unspecified      | 3879000 | 5930 | 562338 | Stroke (430-438), hemorrhagic stroke (431.0-432.9), ischemic stroke |  |  |  |  |





|               |        |  |         |      |  |                                                                                                                                        |                              |              |        |  |    |    |                                 |                 |                                                    |  |  |  |                                |     |      |                                                            |  |
|---------------|--------|--|---------|------|--|----------------------------------------------------------------------------------------------------------------------------------------|------------------------------|--------------|--------|--|----|----|---------------------------------|-----------------|----------------------------------------------------|--|--|--|--------------------------------|-----|------|------------------------------------------------------------|--|
| ihd           | 357927 |  | Rastogi | 2005 |  | Urban hospitals in Bangalore and New Delhi                                                                                             | India                        | Case-control | Male   |  | 21 | 74 | Administered interview          | Hospitalization | Clinical diagnosis                                 |  |  |  | Definite myocardial infarction | 309 | 618  | Hospital                                                   |  |
| stroke        | 358470 |  | Song    | 2005 |  | Male Korean public servants that received health examinations by the national insurance scheme                                         | South Korea                  | Case-control | Male   |  | 18 | 99 | Self-administered questionnaire | Incidence       | Hospital discharge records, physician confirmation |  |  |  | Acute first ischemic stroke    | 290 | 1160 | Population                                                 |  |
| liver_cancer  | 343590 |  | Gelatti | 2005 |  | Cases and controls were recruited from 3 major hospitals in Brescia, at the Aviano Cancer Center and at the Pordenone General Hospital | Friuli-Venezia Giulia, Italy | Case-control | Both   |  | 40 | 79 | Personal interviews             | Incidence       | Histology, cytology, sonography/tomography         |  |  |  | Hepatocellular carcinoma       | 200 | 400  | Hospital based                                             |  |
| liver_cancer  | 125938 |  | Marrero | 2005 |  | Cases and controls from the Liver or General Medicine Clinics at University of Michigan                                                | United States                | Case-control | Both   |  | 18 | 99 | Personal interviews             | Incidence       | Histopathologically confirmed cases                |  |  |  | Hepatocellular carcinoma       | 70  | 70   | Hospital based                                             |  |
| breast_cancer | 310428 |  | Li      | 2005 |  | Three county Seattle-Puget Sound metropolitan area with no history of in situ or invasive breast cancer                                | United States                | Case-control | Female |  | 65 | 79 | Interview                       | Incidence       | Cancer Surveillance System tumor registry          |  |  |  | Invasive breast cancer         | 975 | 1007 | Selected from Health Care Financing Administration records |  |

|                |        |  |           |      |                             |                                                                                      |                         |                    |      |    |    |    |                                         |            |                                       |  |     |       |                                             |      |      |                                                                                           |      |
|----------------|--------|--|-----------|------|-----------------------------|--------------------------------------------------------------------------------------|-------------------------|--------------------|------|----|----|----|-----------------------------------------|------------|---------------------------------------|--|-----|-------|---------------------------------------------|------|------|-------------------------------------------------------------------------------------------|------|
| fractures      | 414208 |  | Kelsey    | 2005 |                             | Patients in five Kaiser Permanente medical centers                                   | United States           | Case-control       | Both |    | 45 | 99 | Standardized administered questionnaire | Incidence  | Radiology reports and medical records |  |     |       | Pelvis fracture, except for coccyx fracture | 192  | 2402 | Clinic members                                                                            |      |
| cvd            | 465261 |  | Kennedy   | 2005 | Cardiovascular Health Study | Residents of 4 communities in North Carolina, California, Maryland, and Pennsylvania | United States           | Prospective cohort | Both | 6  | 65 |    | Medical history                         | Incidence  | Physical examination                  |  | 218 | 2289  | Peripheral vascular disease                 |      |      |                                                                                           |      |
| cvd            | 464776 |  | Hervas    | 2005 |                             | Residents of a basic health zone                                                     | Spain                   | Case-control       | Both | 45 | 95 |    | Medical records                         | Incidence  | Medical records, clinical diagnosis   |  |     |       | Stroke                                      | 91   | 182  | Population                                                                                |      |
| cvd            | 464989 |  | Wanhainen | 2005 |                             | Residents living in the Norsjo municipality                                          | Sweden                  | Case-control       | Both | 65 | 75 |    | Self-administered questionnaire         | Incidence  | Clinical diagnosis                    |  |     |       | Aortic aneurysm                             | 35   | 140  | Population                                                                                |      |
| cvd            | 465266 |  | Zheng     | 2005 |                             | Black and white Americans                                                            | United States           | Cross-sectional    | Both | 45 | 64 |    | Self-report                             | Prevalence | Biomarker                             |  | 464 | 15173 | Peripheral artery disease                   |      |      |                                                                                           | 3944 |
| cvd            | 465268 |  | Jensen    | 2005 |                             | General population of Nord-Trondelag County                                          | Norway                  | Cross-sectional    | Both | 40 | 69 |    | Mailed questionnaire                    | Prevalence | Self-report                           |  | 230 | 19748 | Peripheral artery disease                   |      |      |                                                                                           | 6070 |
| leukemia       | 502419 |  | Kasim     | 2005 |                             | Participants in the Canadian National Enhanced Cancer Surveillance System            |                         | Case-control       | Both |    | 20 | 74 | Mailed questionnaires                   | Incidence  | Cancer registry                       |  |     |       | Leukemia                                    | 1068 | 5034 | Individuals from provincial health insurance plans per province, and random-digit dialing |      |
| bladder_cancer | 343198 |  | Cao       | 2005 |                             | Hospital patients                                                                    | New York, United States | Case-control       | Both |    | 18 | 60 | Structured questionnaire                | Incidence  | Biomarker                             |  |     |       | Bladder cancer                              | 233  | 204  | From the hospitals blood bank                                                             |      |
| bladder_cancer | 502431 |  | Band      | 2005 |                             | Patients from British Columbia                                                       | Canada                  | Case-control       | Male |    | 20 | 99 | Self-administered questionnaire         | Incidence  | Cancer registry                       |  |     |       | Bladder cancer                              | 1125 | 8492 | Controls consisting of all                                                                |      |

|               |        |  |          |      |                                                             |                                                                                    |               |                    |      |    |    |                                 |                                             |                 |                     |        |     |               |                        |      |                                                                               |                  |  |
|---------------|--------|--|----------|------|-------------------------------------------------------------|------------------------------------------------------------------------------------|---------------|--------------------|------|----|----|---------------------------------|---------------------------------------------|-----------------|---------------------|--------|-----|---------------|------------------------|------|-------------------------------------------------------------------------------|------------------|--|
|               |        |  |          |      |                                                             | Cancer Registry                                                                    |               |                    |      |    |    |                                 |                                             |                 |                     |        |     |               |                        |      | other cancer sites, excluding lung cancer and cancers of unknown primary site |                  |  |
| kidney_cancer | 413175 |  | Hu       | 2005 |                                                             | Patients with kidney cancer in provincial cancer registries                        | Canada        | Case-control       | Both | 20 | 99 | Self-administered questionnaire | Incidence                                   | Cancer registry |                     |        |     | Kidney cancer | 1279                   | 5380 | From the general population within a province                                 |                  |  |
| fractures     | 498418 |  | Olofsson | 2005 | Uppsala Longitudinal Study of Adult Men                     | Men born between 1920 and 1924 living in the municipality of Uppsala, Sweden       | Sweden        | Prospective cohort | Male | 30 | 49 | 51                              | Questionnaire and interview and examination | Incidence       | Hospital records    | 57755  | 272 | 2322          | Fracture               |      |                                                                               |                  |  |
| lung_cancer   | 502433 |  | Sreeja   | 2005 |                                                             | female patients with newly diagnosed lung cancer from Prague University Hospital   | Kerala, India | case-control       | Both |    | 25 | 90                              | self-administered questionnaire             | Incidence       | Hospital records    |        |     |               | lung cancer            | 366  | 1624                                                                          | Hospital Visitor |  |
| ihd           | 298268 |  | Gun      | 2006 | Health Watch                                                | Employees of Australian Institute of Petroleum companies                           | Australia     | Prospective cohort | Male | 20 | 30 | 99                              | Administered questionnaire                  | Mortality       | Vital records       | 242368 | 295 |               | Ischemic heart disease |      |                                                                               |                  |  |
| asthma        | 346726 |  | Genuneit | 2006 | International Study of Asthma and Allergies in Childhood II | 9-11 year old participants in phase II of the ISAAC II study in Munich and Dresden | Germany       | Prospective cohort | Both | 8  | 9  | 11                              | Self-administered questionnaire             | Incidence       | Physician diagnosis |        | 64  | 2936          | Asthma                 |      |                                                                               |                  |  |

|                      |        |  |             |      |                         |                                                                                                                                            |                           |                    |        |      |    |    |                                 |            |                                                          |         |     |        |                                                          |  |  |  |     |
|----------------------|--------|--|-------------|------|-------------------------|--------------------------------------------------------------------------------------------------------------------------------------------|---------------------------|--------------------|--------|------|----|----|---------------------------------|------------|----------------------------------------------------------|---------|-----|--------|----------------------------------------------------------|--|--|--|-----|
| asthma               | 346728 |  | Gilliland   | 2006 | Children's Health Study | School-aged children in 12 southern California communities                                                                                 | California, United States | Prospective cohort | Both   | 8    | 8  | 15 | Administered interview          | Incidence  | Physician diagnosis                                      |         | 255 | 2609   | Asthma                                                   |  |  |  |     |
| diabetes             | 348108 |  | Meisinger   | 2006 | MONICA                  | Residents from Augsburg, Germany                                                                                                           | Germany                   | Prospective cohort | Both   | 18   | 25 | 74 | Personal interview              | Incidence  | Self-report, medical records                             |         | 672 | 10892  | Type 2 diabetes mellitus                                 |  |  |  |     |
| lbp                  | 348208 |  | Hestbaek    | 2006 | Danish Twin Registry    | Twins of any zygosity, but the researchers noted that the twins who participated in the study are representative of the general population | Denmark                   | Prospective cohort | Both   | 8    | 12 | 22 | Self-administered questionnaire | Incidence  | Nordic Back Pain questionnaire                           |         | 636 | 6554   | Low back pain during the past year                       |  |  |  |     |
| rheumatoid arthritis | 261500 |  | Costenbader | 2006 | Nurses' Health Study    | Female nurses                                                                                                                              | United States             | Prospective cohort | Female | 22.1 | 30 | 55 | Mailed questionnaire            | Incidence  | Self-reported physician diagnosis, medical record review | 2290759 | 680 | 103818 | Rheumatoid arthritis or other connective tissue diseases |  |  |  |     |
| cvd                  | 120239 |  | He          | 2006 |                         | General elderly metropolitan population of Beijing                                                                                         | China                     | Cross-sectional    | Both   | 60   | 95 |    | Interview                       | Prevalence | Biomarker                                                |         | 462 | 2334   | Peripheral artery disease                                |  |  |  | 353 |
| cvd                  | 140176 |  | Woo         | 2006 |                         | General elderly population of Hong Kong                                                                                                    | Hong Kong                 | Cross-sectional    | Both   | 65   | 83 |    | Interview                       | Prevalence | Physician diagnosis, Biomarker                           |         | 23  | 3998   | Peripheral artery disease                                |  |  |  | 273 |
| cvd                  | 465078 |  | Allison     | 2006 |                         | General population free of clinically apparent cardiovascular disease                                                                      | United States             | Cross-sectional    | Both   | 45   | 85 |    | Questionnaire                   | Prevalence | Biomarker                                                |         | 275 | 6653   | Peripheral artery disease                                |  |  |  | 870 |

|                |        |  |          |      |                                |                                                                          |                                                                       |                    |      |      |    |    |                                                              |            |                     |        |      |       |                           |      |       |                                                         |     |
|----------------|--------|--|----------|------|--------------------------------|--------------------------------------------------------------------------|-----------------------------------------------------------------------|--------------------|------|------|----|----|--------------------------------------------------------------|------------|---------------------|--------|------|-------|---------------------------|------|-------|---------------------------------------------------------|-----|
| cvd            | 465260 |  | Collins  | 2006 |                                | Primary care patients within Harris County, Texas                        | United States                                                         | Cross-sectional    | Both | 63   | 65 |    | Interviewer-administered Lifestyle and Clinical Survey (LCS) | Prevalence | Biomarker           |        | 67   | 403   | Peripheral artery disease |      |       |                                                         | 76  |
| cvd            | 465262 |  | Cui      | 2006 |                                | Elderly male population residing in farming communities                  | Japan                                                                 | Cross-sectional    | Male | 60   | 79 |    | Interview                                                    | Prevalence | Biomarker           |        | 60   | 1215  | Peripheral artery disease |      |       |                                                         | 492 |
| bladder_cancer | 502486 |  | Puente   | 2006 |                                | Hospital patients and individuals from the general population            | Germany, Spain, Italy, United States, France, Greece, Denmark, Canada | Case-control       | Both |      | 30 | 79 | Interview                                                    | Incidence  | Biomarker           |        |      |       | Bladder cancer            | 8316 | 17406 | From general population and hospitals                   |     |
| bladder_cancer | 502464 |  | Samanic  | 2006 |                                | Hospital patients in Barcelona, Valles, Asturias, Alicante, and Tenerife | Spain                                                                 | Case-control       | Both |      | 21 | 80 | Computer-assisted interview                                  | Incidence  | Physician diagnosis |        |      |       | Bladder cancer            | 1219 | 1271  | Hospital patients with other diagnoses excluding cancer |     |
| fractures      | 498421 |  | Holmberg | 2006 | The Malmö Preventive Project   | Middle-aged population                                                   | Sweden                                                                | Prospective cohort | Both | 12.5 | 27 | 61 | Questionnaire and examination                                | Incidence  | Hospital records    | 416825 | 2535 | 33346 | Fracture                  |      |       |                                                         |     |
| fractures      | 498406 |  | White    | 2006 | The Leisure World Cohort Study |                                                                          | Southern California, United States                                    | Prospective cohort | Both | 2    | 73 | 99 | Questionnaire                                                | Incidence  | Self-report         | 49586  | 278  | 4769  | Hip fracture              |      |       |                                                         |     |
| ihd            | 330932 |  | Lam      | 2007 |                                | Elderly Chinese adults enrolled in 18 Elderly Health Centers             | Hong Kong                                                             | Prospective cohort | Both | 4.1  | 65 | 99 | Structured interviews                                        | Mortality  | Vital records       | 73291  | 190  | 56167 | Ischemic heart disease    |      |       |                                                         |     |
| stroke         | 330932 |  | Lam      | 2007 |                                | Elderly Chinese adults enrolled in 18 Elderly Health Centers             | Hong Kong                                                             | Prospective cohort | Both | 4.1  | 65 | 99 | Structured interviews                                        | Mortality  | Vital records       | 86992  | 191  | 54216 | Stroke                    |      |       |                                                         |     |



|                   |        |  |           |      |                                                                  |                                                                                                                                       |                           |                    |      |      |    |    |                                 |                       |                                                   |         |     |        |                                        |  |  |  |  |
|-------------------|--------|--|-----------|------|------------------------------------------------------------------|---------------------------------------------------------------------------------------------------------------------------------------|---------------------------|--------------------|------|------|----|----|---------------------------------|-----------------------|---------------------------------------------------|---------|-----|--------|----------------------------------------|--|--|--|--|
| tb                | 359230 |  | Pednekar  | 2007 | Mumbai Cohort Study                                              | Male population living in the main (island) city of Mumbai                                                                            | India                     | Prospective cohort | Male | 6    | 35 | 99 | Interview                       | Mortality             | Death certificates                                | 490402  | 633 | 81443  | Tuberculosis                           |  |  |  |  |
| aortic_aneurism   | 358843 |  | Wong      | 2007 | Health Professionals Follow-up Study                             | Male health professionals                                                                                                             | United States             | Prospective cohort | Male | 16   | 40 | 75 | Self-administered questionnaire | Incidence             | Medical records, self-report, vital records       | 576374  | 376 | 39352  | Abdominal aortic aneurysm              |  |  |  |  |
| aortic_aneurism   | 358845 |  | Iribarren | 2007 | Kaiser Permanente Multiphasic Cohort Study                       | Subscribers of Kaiser Permanente (KP) who attended voluntary Multiphasic Health Checkups at KP locations in Oakland and San Francisco | California, United States | Prospective cohort | Both | 32   | 18 | 99 | Self-administered questionnaire | Incidence             | Physician diagnosis                               |         | 605 | 104813 | Abdominal aortic aneurysm              |  |  |  |  |
| prostate_cancer   | 347451 |  | Rohrman   | 2007 | 1963 Washington County Census Cohort                             | Washington County households                                                                                                          | United States             | Prospective cohort | Male | 19   | 18 |    | Census responses                | Incidence & Mortality | Disease registry                                  | 412559  | 258 | 38857  | Prostate cancer                        |  |  |  |  |
| parkinson         | 359159 |  | Thacker   | 2007 | Cancer Prevention Study (CPS) II Nutrition Cohort                | General population                                                                                                                    | United States             | Prospective cohort | Both | 8.4  | 55 | 84 | Mailed questionnaire            | Incidence             | Self-report, physician diagnosis, medical records | 1208264 | 405 | 143325 | Definite or probable Parkinson disease |  |  |  |  |
| esophageal_cancer | 328339 |  | Ozasa     | 2007 | Japan Collaborative Cohort Study for Evaluation of Cancer (JACC) | Residents of 45 study areas                                                                                                           | Japan                     | Prospective cohort | Both | 12.7 | 40 | 79 | Self-administered questionnaire | Mortality             | Vital records                                     | 1257974 | 183 | 109778 | Esophageal cancer                      |  |  |  |  |
| leukemia          | 328339 |  | Ozasa     | 2007 | Japan Collaborative Cohort Study for Evaluation of Cancer (JACC) | Residents of 45 study areas                                                                                                           | Japan                     | Prospective cohort | Both | 12.7 | 40 | 79 | Self-administered questionnaire | Mortality             | Vital records                                     | 1257974 | 43  | 109778 | Myeloid leukemia                       |  |  |  |  |

|                         |        |  |       |      |                                                                  |                                                                                  |       |                    |        |      |    |    |                                 |           |                                                                 |         |     |        |                                                                        |  |  |  |  |
|-------------------------|--------|--|-------|------|------------------------------------------------------------------|----------------------------------------------------------------------------------|-------|--------------------|--------|------|----|----|---------------------------------|-----------|-----------------------------------------------------------------|---------|-----|--------|------------------------------------------------------------------------|--|--|--|--|
| liver_cancer            | 328339 |  | Ozasa | 2007 | Japan Collaborative Cohort Study for Evaluation of Cancer        | Residents from 45 areas in Japan                                                 | Japan | Prospective cohort | Both   | 20   | 40 | 79 | Self-administered questionnaire | Mortality | Disease registry, vital records                                 | 1257974 | 620 | 109778 | Liver cancer (ICD-10, C22)                                             |  |  |  |  |
| breast_cancer           | 328339 |  | Ozasa | 2007 | Japan Collaborative Cohort Study for Evaluation of Cancer (JACC) | General population                                                               | Japan | Prospective cohort | Female | 12.9 | 40 | 79 | Self-administered questionnaire | Mortality | Administrative records                                          | 817669  | 103 | 63600  | Breast cancer                                                          |  |  |  |  |
| cervical_cancer         | 328339 |  | Ozasa | 2007 | Japan Collaborative Cohort Study for Evaluation of Cancer (JACC) | Residents of 45 study areas                                                      | Japan | Prospective cohort | Female | 12.7 | 40 | 79 | Self-administered questionnaire | Mortality | Vital records                                                   | 709227  | 33  | 63600  | Cervix uteri cancer (ICD-10 C53)                                       |  |  |  |  |
| colon_and_rectum_cancer | 328339 |  | Ozasa | 2007 | Japan Collaborative Cohort Study for Evaluation of Cancer (JACC) | Residents living in 45 areas all across Japan without previous history of cancer | Japan | Prospective cohort | Both   | 12.7 | 40 | 79 | Self-administered questionnaire | Mortality | Administrative records                                          | 1393146 | 484 | 109778 | Cancer of the colon (ICD-10 C18), cancer of the rectum (ICD-10 C19-20) |  |  |  |  |
| pancreatic_cancer       | 164547 |  | Luo   | 2007 | Japan Public Health Center-based (JPHC) Prospective Study        | All registered Japanese inhabitants in 11 public health centers throughout Japan | Japan | Prospective cohort | Male   | 11   | 40 | 69 | Self-administered questionnaire | Incidence | Disease registry, vital records, histologically confirmed cases | 1063235 | 224 | 99670  | Pancreatic cancer                                                      |  |  |  |  |
| kidney_cancer           | 328339 |  | Ozasa | 2007 | Japan Collaborative Cohort Study for Evaluation of Cancer        | Residents from 45 areas in Japan                                                 | Japan | Prospective cohort | Both   | 20   | 40 | 79 | Self-administered questionnaire | Mortality | Disease registry, vital records                                 | 1257974 | 56  | 109778 | Kidney cancer (ICD-10, C64)                                            |  |  |  |  |
| prostate_cancer         | 328339 |  | Ozasa | 2007 | Japan Collaborative Cohort Study for Evaluation of Cancer (JACC) | Population recruitment in 45 across the whole of Japan                           | Japan | Prospective cohort | Male   | 12.5 | 40 | 79 | Self-administered questionnaire | Mortality | Administrative records                                          | 404992  | 105 | 46178  | Prostate cancer (ICD-10 C61)                                           |  |  |  |  |

|                   |        |  |               |      |                                                                                                        |                                                                                                                                                                    |            |                       |            |    |    |    |                               |                                  |                                                                                                                |        |     |      |                                                            |                                   |      |                                                                 |  |  |
|-------------------|--------|--|---------------|------|--------------------------------------------------------------------------------------------------------|--------------------------------------------------------------------------------------------------------------------------------------------------------------------|------------|-----------------------|------------|----|----|----|-------------------------------|----------------------------------|----------------------------------------------------------------------------------------------------------------|--------|-----|------|------------------------------------------------------------|-----------------------------------|------|-----------------------------------------------------------------|--|--|
| ihd               | 357410 |  | Kabagamb<br>e | 2007 |                                                                                                        | Hispanic<br>Americans<br>in the<br>central<br>valley                                                                                                               | Costa Rica | Case-control          | Both       |    | 18 | 99 | Administered<br>questionnaire | Non-fatal<br>hospitaliza<br>tion | Diagnosis<br>by two<br>cardiologis<br>ts                                                                       |        |     |      | Non-fatal<br>acute<br>myocardial<br>infarction             | 889                               | 1167 | Populatio<br>n                                                  |  |  |
| ihd               | 357427 |  | Oliveira      | 2007 |                                                                                                        | Residents of<br>the<br>catchment<br>area of<br>select<br>hospitals in<br>Porto                                                                                     | Portugal   | Case-control          | Both       |    | 18 | 45 | Administered<br>questionnaire | Hospitaliz<br>ation              | Clinical<br>diagnosis                                                                                          |        |     |      | First<br>incidence<br>of acute<br>myocardial<br>infarction | 329                               | 778  | Populatio<br>n                                                  |  |  |
| breast_ca<br>ncer | 310366 |  | Magnusson     | 2007 |                                                                                                        | Swedish-<br>born<br>females                                                                                                                                        | Sweden     | Case-control          | Femal<br>e |    | 50 | 74 | Mailed<br>questionnaire       | Incidence                        | Regional<br>Cancer<br>Registries                                                                               |        |     |      | Invasive<br>breast<br>cancer                               | 3345                              | 3454 | Randoml<br>y<br>selected<br>from the<br>study<br>populatio<br>n |  |  |
| cvd               | 455688 |  | Tapp          | 2007 | Data from<br>an<br>Epidemiolo<br>gical Study<br>of the<br>Insulin<br>Resistance<br>Syndrome<br>(DESIR) | Patients<br>from 10<br>health<br>examination<br>centers in<br>western<br>central<br>France that<br>are insured<br>by the<br>French<br>Social<br>Security<br>system | France     | Prospective<br>cohort | Both       | 6  | 30 | 65 | Questionnaire                 | Incidence                        | Medical<br>examinatio<br>n,<br>including<br>ankle<br>brachial<br>pressure<br>index and<br>symptom<br>questions |        |     | 173  | 3632                                                       | Peripheral<br>vascular<br>disease |      |                                                                 |  |  |
| cvd               | 463449 |  | Hozawa        | 2007 | NIPPON<br>DATA80                                                                                       | Household<br>members<br>older than<br>30 years old<br>in 300<br>census tracts                                                                                      | Japan      | Prospective<br>cohort | Both       | 19 | 30 |    | Administered<br>questionnaire | Mortality                        | Vital<br>records                                                                                               | 154767 | 604 | 8912 | Cardiovasc<br>ular<br>diseases                             |                                   |      |                                                                 |  |  |
| cvd               | 441652 |  | Lipska        | 2007 |                                                                                                        | Patients at<br>the Sree<br>Chitra<br>Tirunal<br>Institute for<br>Medical<br>Sciences<br>and<br>Technology,<br>Trivandrum,<br>Kerala                                | India      | Case-control          | Both       | 15 | 45 |    | Interview                     | Incidence                        | Medical<br>diagnosis                                                                                           |        |     |      | Ischemic<br>stroke                                         | 214                               | 195  | Hospital<br>and<br>populatio<br>n                               |  |  |

|               |        |  |          |      |                                                        |                                                                                                    |                                      |                    |        |     |    |    |                                 |                              |                                                                               |         |      |        |                                        |  |  |  |     |
|---------------|--------|--|----------|------|--------------------------------------------------------|----------------------------------------------------------------------------------------------------|--------------------------------------|--------------------|--------|-----|----|----|---------------------------------|------------------------------|-------------------------------------------------------------------------------|---------|------|--------|----------------------------------------|--|--|--|-----|
| cvd           | 465264 |  | Sritara  | 2007 |                                                        | Employees of the Electricity Generating Authority (EGAT) of Thailand                               | Thailand                             | Cross-sectional    | Both   | 52  | 73 |    | Self-administered questionnaire | Prevalence                   | Biomarker                                                                     |         | 121  | 2305   | Peripheral artery disease              |  |  |  | 357 |
| parkinson     | 359159 |  | Thacker  | 2007 | Cancer Prevention Study (CPS) II Nutrition Cohort      | General population                                                                                 | United States                        | Prospective cohort | Both   | 8.4 | 55 | 84 | Mailed questionnaire            | Incidence                    | Self-report, physician diagnosis, medical records                             | 1208264 | 405  | 143325 | Definite or probable Parkinson disease |  |  |  |     |
| kidney_cancer | 164580 |  | Setiawan | 2007 | Multiethnic Cohort                                     | African Americans, Japanese, Latinos, Native Hawaiians, and Whites living in Hawaii and California | Hawaii and California, United States | Prospective cohort | Both   | 8.3 | 45 | 75 | Self-administered questionnaire | Incidence                    | Cancer registry                                                               | 1348881 | 347  | 161126 | Kidney cancer                          |  |  |  |     |
| fractures     | 414206 |  | Robbins  | 2007 |                                                        | Postmenopausal women aged 50-79 years from 40 clinical centers                                     | United States                        | Prospective cohort | Female | 7.6 | 50 | 79 | Interview                       | Incidence                    | Self-report                                                                   | 711,938 | 791  | 93676  | Hip fracture                           |  |  |  |     |
| lung_cancer   | 358577 |  | Shimazu  | 2008 | Japan Public Health Center-based Prospective study     | All registered Japanese inhabitants in the ten public health center areas                          | Japan                                | Prospective cohort | Male   | 14  | 40 | 69 | Self-administered questionnaire | Incidence                    | Voluntary reports from major hospitals, disease registries, and vital records | 536325  | 561  | 50364  | Lung cancer                            |  |  |  |     |
| ihd           | 331705 |  | Lawlor   | 2008 | Korean National Health System Prospective Cohort Study | Male Korean public servants                                                                        | South Korea                          | Prospective cohort | Male   | 10  | 30 | 64 | Questionnaire                   | Hospitalization or Mortality | Medical claim data, vital records                                             | 648346  | 3329 | 648346 | Myocardial infarction (ICD-10 I21-I24) |  |  |  |     |
| stroke        | 155207 |  | Chiuve   | 2008 | Health Professionals Follow-up Study; Nurses'          | Male health professionals and female nurses                                                        | United States                        | Prospective cohort | Both   | 20  | 35 | 99 | Questionnaire                   | Incidence or Mortality       | Medical records, self-reported hospitaliza                                    |         | 2553 | 114928 | Total stroke                           |  |  |  |     |



|                           |        |  |          |      |                                                                                                         |                |                     |        |     |    |    |                            |                        |                                           |  |     |        |                                                                                                                                                     |     |     |                                                                                            |  |
|---------------------------|--------|--|----------|------|---------------------------------------------------------------------------------------------------------|----------------|---------------------|--------|-----|----|----|----------------------------|------------------------|-------------------------------------------|--|-----|--------|-----------------------------------------------------------------------------------------------------------------------------------------------------|-----|-----|--------------------------------------------------------------------------------------------|--|
|                           |        |  |          |      | older and having no prior cancer diagnosis                                                              |                |                     |        |     |    |    |                            |                        |                                           |  |     |        |                                                                                                                                                     |     |     |                                                                                            |  |
| lbp                       | 348206 |  | Mikkonen | 2008 | Oulu Back Study (OBS) comprised of study participants who lived within 100 km of the city of Oulu       | Finland        | Prospective cohort  | Both   | 2   | 16 | 16 | Mailed questionnaire       | Incidence              | Mailed questionnaire                      |  | 539 | 1987   | Incident cases were defined as those reporting LBP at 18 but not at 16 years of age and persistent cases as those reporting LBP at both time points |     |     |                                                                                            |  |
| stroke                    | 344315 |  | Bhat     | 2008 | Residents of the greater Baltimore-Washington area                                                      | United States  | Case-control        | Female |     | 18 | 49 | Standardized interviews    | Hospitalization        | Discharge surveillance, medical records   |  |     |        | First cerebral infarction                                                                                                                           | 466 | 604 | Population                                                                                 |  |
| tb                        | 359225 |  | Dhamgaye | 2008 | Population in a catchment areas of a public population-based tuberculosis hospital in Yavatnal district | India          | Case-control        | Male   |     | 20 | 99 | Interview                  | Incidence              | Physician diagnosis, biomarker            |  |     |        | Active pulmonary tuberculosis                                                                                                                       | 153 | 160 | Healthy individuals who were accompanying other patients to the same hospital as the cases |  |
| afib_and_flutter          | 350091 |  | Maattili | 2008 | Family doctor patients                                                                                  | Italy          | Case-control        | Both   |     |    |    | Interview                  | Incidence              | Clinical examination and ECG confirmation |  |     |        | Acute lone atrial fibrillation                                                                                                                      | 400 | 400 | Clinic-based                                                                               |  |
| alzheimerr_other_dementia | 358834 |  | Ikeda    | 2008 | Elderly adults from the town of Kyowa                                                                   | Ibaraki, Japan | Nested case-control | Both   |     | 65 | 99 | Personal interview         | Incidence              | Physician diagnosis                       |  |     |        | Dementia                                                                                                                                            | 208 | 416 | General population                                                                         |  |
| cvd                       | 330677 |  | Kelly    | 2008 | China National                                                                                          | China          | Prospective cohort  | Both   | 8.3 | 40 | 99 | Administered questionnaire | Incidence or Mortality | Medical records, vital                    |  | 678 | 155131 | Stroke                                                                                                                                              |     |     |                                                                                            |  |



|                        |        |  |          |      |                                                                                                                                                              |         |                     |        |      |    |    |                                 |                                 |                    |        |     |                             |                                                                                                                                                                                              |     |                   |            |  |
|------------------------|--------|--|----------|------|--------------------------------------------------------------------------------------------------------------------------------------------------------------|---------|---------------------|--------|------|----|----|---------------------------------|---------------------------------|--------------------|--------|-----|-----------------------------|----------------------------------------------------------------------------------------------------------------------------------------------------------------------------------------------|-----|-------------------|------------|--|
|                        |        |  |          |      | Department of Neurosurgery at Sree Chitra Tirunal Institute for Medical Science and Technology, Kerala                                                       |         |                     |        |      |    |    |                                 |                                 |                    |        |     | hemorrhage                  |                                                                                                                                                                                              |     |                   |            |  |
| cvd                    | 465070 |  | Schgoer  | 2008 | Patients from the St. John of God Hospital in Linz, Austria                                                                                                  | Austria | Nested case-control | Both   | 46   | 88 |    |                                 |                                 |                    |        |     | Peripheral vascular disease | 433                                                                                                                                                                                          | 433 | Cohort population |            |  |
| stroke                 | 429295 |  | Lu       | 2008 | Swedish Women's Lifestyle and Health Cohort Study<br>random sample of 96,000 women born between 1943 and 1962 and residing in the Uppsala Health Care Region | Sweden  | Prospective cohort  | Female | 11.4 | 30 | 50 | Self-administered questionnaire | Incidence                       | Disease registry   | 518118 | 170 | 45449                       | Stroke (ischemic stroke (occlusion of cerebral arteries, IS; ICD9: 434; ICD10: I63.3–I63.9), intracerebral hemorrhage (ICD9: 431; ICD10: I61), and undefined stroke (ICD9: 436; ICD10: I64)) |     |                   |            |  |
| lip_oral_cavity_cancer | 286841 |  | Muwong R | 2008 | apparently healthy individuals aged 35 years and above living in 13 clusters called 'panchayaths'                                                            | India   | case-control        | Both   |      | 35 | 75 | self-report                     | incidence of oral cavity cancer | Death certificates |        |     |                             | Lip and Oral Cavity Cancer                                                                                                                                                                   | 282 | 1410              | population |  |



|                |        |  |           |      |                                                                                                                          |                                             |                           |      |     |    |    |                          |           |                                                        |         |      |        |                           |      |      |                                                                       |  |
|----------------|--------|--|-----------|------|--------------------------------------------------------------------------------------------------------------------------|---------------------------------------------|---------------------------|------|-----|----|----|--------------------------|-----------|--------------------------------------------------------|---------|------|--------|---------------------------|------|------|-----------------------------------------------------------------------|--|
|                |        |  |           |      | (municipal administrative units in rural areas of India, with total populations of 20 000–50 000) in Trivandrum district |                                             |                           |      |     |    |    |                          |           |                                                        |         |      |        |                           |      |      |                                                                       |  |
| bladder_cancer | 502415 |  | Liang     | 2008 | Patients from the Texas M.D. Anderson Cancer Center and Baylor College of Medicine                                       | Texas, United States                        | Case-control              | Both |     | 31 | 95 | Structured questionnaire | Incidence | Physician diagnosis, biomarker                         |         |      |        | Bladder cancer            | 386  | 389  | Healthy individuals coming to the clinics for annual health check-ups |  |
| bladder_cancer | 502435 |  | Covolo    | 2008 | Male residents in Brescia province (Northern Italy)                                                                      | Brescia, Italy                              | Case-control              | Male |     | 30 | 80 | Structured interview     | Incidence | Biomarker                                              |         |      |        | Bladder cancer            | 197  | 211  | Residents in Brescia province                                         |  |
| kidney_cancer  | 502427 |  | Theis     | 2008 | Hospital patients                                                                                                        | Florida, United States                      | Case-control              | Both |     | 20 | 99 | Structured questionnaire | Incidence | Hospital records                                       |         |      |        | Kidney cancer             | 304  | 337  | From random-digit dialing                                             |  |
| kidney_cancer  | 502448 |  | Demirel   | 2008 | Hospital patients                                                                                                        | Russia, Romania, Poland, and Czech Republic | Case-control              | Both |     | 20 | 79 | Standardized interviews  | Incidence | Hospital records                                       |         |      |        | Kidney cancer             | 1097 | 1476 | Patients from the same hospitals                                      |  |
| copd           | 115406 |  | Van Durme | 2009 | Rotterdam Study<br>Ommoord, a well-defined suburb of the city of Rotterdam                                               | Netherlands                                 | Prospective cohort        | Both | 8.8 | 55 | 99 | Interview                | Incidence | Hospital discharge records, medical records, biomarker | 70209   | 648  | 7983   | Definite or probable COPD |      |      |                                                                       |  |
| stroke         | 335914 |  | Honjo     | 2009 | Japan Public Health Center-Based Prospective (JPHC) Study;                                                               | Japan                                       | Pooled prospective cohort | Both | 9.6 | 40 | 79 | Screening survey         | Mortality | Vital records                                          | 2855395 | 3131 | 296836 | Stroke                    |      |      |                                                                       |  |





|                    |        |  |          |      |                                                                                                      |                                                                          |                 |                           |      |      |    |    |                                 |                              |                                                |         |      |        |                                                                                     |     |      |            |  |  |
|--------------------|--------|--|----------|------|------------------------------------------------------------------------------------------------------|--------------------------------------------------------------------------|-----------------|---------------------------|------|------|----|----|---------------------------------|------------------------------|------------------------------------------------|---------|------|--------|-------------------------------------------------------------------------------------|-----|------|------------|--|--|
|                    |        |  |          |      | Screening Service                                                                                    |                                                                          |                 |                           |      |      |    |    |                                 |                              |                                                |         |      |        |                                                                                     |     |      |            |  |  |
| ihd                | 357429 |  | Oliveira | 2009 |                                                                                                      | White Portuguese adults in Porto                                         | Portugal        | Case-control              | Both |      | 18 | 99 | Administered questionnaire      | Non-fatal hospitalization    | Clinical diagnosis                             |         |      |        | First incidence of acute myocardial infarction with more than four days of survival | 918 | 2316 | Population |  |  |
| multiple_sclerosis | 369022 |  | Jafari   | 2009 |                                                                                                      | Families attending outpatient ErasMS clinic or other neurological clinic | the Netherlands | Case-control              | Both |      | 30 | 81 | Self-administered questionnaire | Incidence                    | Disease database                               |         |      |        | Multiple sclerosis                                                                  | 136 | 204  | Families   |  |  |
| cvd                | 335914 |  | Honjo    | 2009 | Japan Public Health Center-Based Prospective (JPHC) Study; Three-Prefecture Cohort Study; JACC Study | Japanese adults                                                          | Japan           | Pooled prospective cohort | Both | 9.6  | 40 | 79 | Screening survey                | Mortality                    | Vital records                                  | 2855395 | 3131 | 296836 | Stroke                                                                              |     |      |            |  |  |
| cvd                | 408671 |  | Sandavei | 2009 | HUNT                                                                                                 | Residents of Nord-Trondelag county                                       | Norway          | Prospective cohort        | Both | 22   | 28 | 90 | Self-administered questionnaire | Hospitalization or Mortality | Hospital database, vital records               |         | 132  | 74845  | Subarachnoid hemorrhage                                                             |     |      |            |  |  |
| cvd                | 437824 |  | Simons   | 2009 | Dubbo study                                                                                          | Non-institutionalized residents of Dubbo                                 | Australia       | Prospective cohort        | Both | 16   | 59 |    | Administered risk assessment    | Hospitalization or Mortality | Hospital records, vital records, mailed survey |         | 1273 | 2805   | Ischemic heart disease; Ischemic stroke; Cardiovascular diseases                    |     |      |            |  |  |
| cvd                | 463811 |  | Chuang   | 2009 | CVDFACTS                                                                                             | Residents in 5 villages in Chu-Dung and Pu-Tzu, each                     | Taiwan          | Prospective cohort        | Both | 10.4 | 20 | 99 | Questionnaire-based interview   | Incidence or Mortality       | Self-reported, vital records, insurance claims |         | 128  | 6312   | Ischemic stroke                                                                     |     |      |            |  |  |

|           |        |  |          |      |                                |                                                                                                                                   |                 |                    |        |      |    |    |                          |            |                                                     |          |      |       |                                         |     |      |                                                |      |
|-----------|--------|--|----------|------|--------------------------------|-----------------------------------------------------------------------------------------------------------------------------------|-----------------|--------------------|--------|------|----|----|--------------------------|------------|-----------------------------------------------------|----------|------|-------|-----------------------------------------|-----|------|------------------------------------------------|------|
| cvd       | 437516 |  | Oliveira | 2009 |                                | Male patients from four hospitals in Porto                                                                                        | Portugal        | Case-control       | Male   | 18   | 99 |    | Interview                | Incidence  | Medical diagnosis                                   |          |      |       | Ischemic heart disease                  | 638 | 851  | Population                                     |      |
| cvd       | 463834 |  | Urbanus  | 2009 |                                | Patients from 16 centers and the University Medical Centre Utrecht                                                                | The Netherlands | Case-control       | Female | 23   | 55 |    | Structured questionnaire | Incidence  | Medical records, physician diagnosis                |          |      |       | Ischemic heart disease; Ischemic stroke | 378 | 628  | Population                                     |      |
| cvd       | 463856 |  | Woo      | 2009 |                                | Patients within 50 miles of the University of Cincinnati                                                                          | United States   | Case-control       | Both   | 26   | 77 |    | Interview                | Incidence  | Clinical records, hospital discharge records        |          |      |       | Subarachnoid hemorrhage                 | 339 | 1016 | Population                                     |      |
| cvd       | 465073 |  | Agarwal  | 2009 |                                | General civilian and noninstitutionalized population of the United States                                                         | United States   | Cross-sectional    | Both   | 40   | 91 |    | Interview                | Prevalence | Biomarker                                           |          | 647  | 7751  | Peripheral artery disease               |     |      |                                                | 1856 |
| cvd       | 465271 |  | Cacoub   | 2009 |                                | General population at high risk for PAD                                                                                           | France          | Cross-sectional    | Both   | 55   | 86 |    | Self-report              | Prevalence | Biomarker                                           |          | 1579 | 5679  | Peripheral artery disease               |     |      |                                                | 1292 |
| parkinson | 359158 |  | Driver   | 2009 | Physicians' Health Study (PHS) | US male physicians without history of cardiovascular disease, cancer (except nonmelanoma skin cancer), or other serious illnesses | United States   | Prospective cohort | Male   | 21.3 | 40 | 84 | Mailed questionnaire     | Incidence  | Self-report, medical records                        | 467316.5 | 563  | 21970 | New diagnosis of Parkinson disease      |     |      |                                                |      |
| leukemia  | 502395 |  | Björk    | 2009 |                                | Individuals with acute myeloid leukemia and myelodysplasia                                                                        | Sweden          | Case-control       | Both   |      | 20 | 80 | Structured interview     | Incidence  | Local diagnostic laboratories, physician diagnosis, |          |      |       | Leukemia                                | 179 | 278  | From the general population of Southern Sweden |      |

|                |        |  |           |      |                                                                      |                                                           |                                             |                    |      |      |    |    |                                 |                        |                                           |         |     |        |                |      |                                      |                                                                                                                                                                      |  |
|----------------|--------|--|-----------|------|----------------------------------------------------------------------|-----------------------------------------------------------|---------------------------------------------|--------------------|------|------|----|----|---------------------------------|------------------------|-------------------------------------------|---------|-----|--------|----------------|------|--------------------------------------|----------------------------------------------------------------------------------------------------------------------------------------------------------------------|--|
|                |        |  |           |      | stic syndromes in the Southern Health Care Region of Sweden          |                                                           |                                             |                    |      |      |    |    |                                 | and cancer registry    |                                           |         |     |        |                |      | and melanoma patients from hospitals |                                                                                                                                                                      |  |
| leukemia       | 502397 |  | Wong      | 2009 |                                                                      | Patients in 29 hospitals in Shanghai                      | Shanghai, China                             | Case-control       | Both |      | 18 | 99 | Structured interview            | Incidence              | Hospital records                          |         |     |        | Leukemia       | 722  | 1444                                 | Patients from the same hospitals                                                                                                                                     |  |
| bladder_cancer | 502456 |  | Kurahashi | 2009 | Japan Public Health Center-based Prospective Study (Cohort I and II) | Registered individuals in five Public Health Center areas | Japan                                       | Prospective cohort | Both | 12.6 | 40 | 69 | Self-administered questionnaire | Incidence or Mortality | Hospital notification and cancer registry | 1314586 | 206 | 104440 | Bladder cancer |      |                                      |                                                                                                                                                                      |  |
| bladder_cancer | 502450 |  | Baris     | 2009 |                                                                      | Residents of three states (Maine, Vermont, New Hampshire) | United States                               | Case-control       | Both |      | 30 | 79 | Structured interview            | Incidence              | Physician diagnosis, biomarker            |         |     |        | Bladder cancer | 1170 | 1413                                 | Controls were randomly selected from Department of Motor Vehicle records in each state and the beneficiary records of the Centers for Medicare and Medicaid Services |  |
| bladder_cancer | 502446 |  | Stern     | 2009 |                                                                      | Residents of Los Angeles County and Shanghai              | Shanghai, China, Los Angeles, United States | Case-control       | Both |      | 25 | 68 | Self-administered questionnaire | Incidence              | Physician diagnosis                       |         |     |        | Bladder cancer | 1042 | 1123                                 | Residents in neighborhoods of cases in Los Angeles County                                                                                                            |  |

|                           |        |  |           |      |                                                                                               |                                                                                  |                    |                    |      |    |    |                            |                                 |                                                         |                                |      |        |                |                                          |      |                                                                                                                                                                            |  |  |
|---------------------------|--------|--|-----------|------|-----------------------------------------------------------------------------------------------|----------------------------------------------------------------------------------|--------------------|--------------------|------|----|----|----------------------------|---------------------------------|---------------------------------------------------------|--------------------------------|------|--------|----------------|------------------------------------------|------|----------------------------------------------------------------------------------------------------------------------------------------------------------------------------|--|--|
|                           |        |  |           |      |                                                                                               |                                                                                  |                    |                    |      |    |    |                            |                                 |                                                         |                                |      |        |                |                                          |      | and Shanghai                                                                                                                                                               |  |  |
| bladder_cancer            | 502476 |  | Wallace   | 2009 | Residents in the New Hampshire State Department of Health and Human Services' Cancer Registry | New Hampshire, United States                                                     | Case-control       | Both               |      | 25 | 74 | Personal interview         | Incidence                       | Physician diagnosis                                     |                                |      |        | Bladder cancer | 857                                      | 1191 | Residents from population lists obtained from the New Hampshire Department of Transportation and provided by the Centers for Medicare & Medicaid Services of New Hampshire |  |  |
| lung_cancer               | 502234 |  | Hosseini  | 2009 | patients at various hospitals diagnosed with lung cancer at participating hospitals           | Tehran, Iran                                                                     | case-control       | Both               |      | 20 | 99 | administered interview     | Incidence                       | clinical records, confirmed with histology and cytology |                                |      |        | Lung cancer    |                                          |      |                                                                                                                                                                            |  |  |
| tb                        | 327906 |  | Wen       | 2010 | General population                                                                            | Taiwan                                                                           | Prospective cohort | Both               | 7.9  | 20 | 99 | Administered questionnaire | Incidence & Mortality           | Self-report                                             | 3853845                        | 5036 | 486341 | Tuberculosis   |                                          |      |                                                                                                                                                                            |  |  |
| diabetes                  | 309610 |  | Jee       | 2010 | Korea Cancer Prevention Study                                                                 | Korean men and women who participated in a National Health Insurance Corporation | Republic of Korea  | Prospective cohort | Both | 14 | 30 | 95                         | Self-administered questionnaire | Incidence & Mortality                                   | Medical records, vital records |      | 102005 | 1236443        | Diabetes (ICD-10, E11-E11x and E14-E14x) |      |                                                                                                                                                                            |  |  |
| peripheral_artery_disease | 359221 |  | St-Pierre | 2010 | Quebec Cardiovascular Study                                                                   | Residents of seven Quebec suburbs                                                | Canada             | Prospective cohort | Male | 24 | 35 | 64                         | Self-reported                   | Incidence                                               | Medical evaluation             |      | 300    | 4076           | Intermittent claudication                |      |                                                                                                                                                                            |  |  |

|                           |        |  |            |      |                                                                     |                                                                                                 |                                                                                             |                     |      |     |    |    |                                 |           |                                                    |         |     |        |                                           |      |        |                                      |  |
|---------------------------|--------|--|------------|------|---------------------------------------------------------------------|-------------------------------------------------------------------------------------------------|---------------------------------------------------------------------------------------------|---------------------|------|-----|----|----|---------------------------------|-----------|----------------------------------------------------|---------|-----|--------|-------------------------------------------|------|--------|--------------------------------------|--|
| peripheral_artery_disease | 359223 |  | Lakshmanan | 2010 | Health in Men Study                                                 | Men on the Western Australia electoral roll                                                     | Australia                                                                                   | Prospective cohort  | Male | 5.7 | 65 | 83 | Administered questionnaire      | Incidence | Self-reported and medical record review            |         | 638 | 11332  | Peripheral arterial disease               |      |        |                                      |  |
| pancreatic_cancer         | 359138 |  | Vrieling   | 2010 | European Prospective Investigation into Cancer and Nutrition (EPIC) | Residents recruited from 23 centers in 10 European countries                                    | Denmark, France, Germany, Greece, Italy, Netherlands, Norway, Spain, Sweden, United Kingdom | Prospective cohort  | Both | 8.7 | 35 | 70 | Self-administered questionnaire | Incidence | Disease registry, health insurance records         | 4051920 | 524 | 465910 | Pancreatic cancer (ICD-O-2, C25)          |      |        |                                      |  |
| lung_cancer               | 359451 |  | Boffetta   | 2010 |                                                                     | hospital and community-based participants from 6 locations in the United States                 | United States (California, Hawaii, Massachusetts, Michigan, New York)                       | Pooled case-control | Both |     | 18 | 99 | Self-reported                   | Incidence | Histologic confirmed cases                         |         |     |        | Lung cancer, bronchioloalveolar carcinoma | 799  | 16658  | Varied                               |  |
| alzheimer_other_dementia  | 349159 |  | Garcia     | 2010 |                                                                     | Cases were from five towns of the region of Valencia and controls from general Spain population | Spain                                                                                       | Case-control        | Both |     | 18 | 99 | Personal interview              | Incidence | Disease registry, personal interviews with proxies |         |     |        | Alzheimer's                               | 176  | 246    | General population                   |  |
| parkinson                 | 359157 |  | Chen       | 2010 |                                                                     | AARP members from six US states and 2 metropolitan areas                                        | United States                                                                               | Case-control        | Both |     | 50 | 71 | Self-administered questionnaire | Incidence | Self-report, medical records                       |         |     |        | Parkinson disease                         | 1662 | 303806 | Portion of cohort who were not cases |  |
| laryngeal_cancer          | 364113 |  | Lubin      | 2010 |                                                                     | Pooled results from the International Health and Neck Cancer Epidemiology (INHANCE              | Multiple                                                                                    | Pooled case-control | Both |     | 18 | 99 | Self-reported                   | Incidence | Varied                                             |         |     |        | Laryngeal cancer                          | 1356 | 6910   | Varied                               |  |



|                        |        |  |        |      |              |                                                                                         |                                                                                                                                                                                   |                     |        |  |    |    |                      |           |                                          |  |  |  |  |  |  |                                                                                      |      |      |                                                                                                                   |
|------------------------|--------|--|--------|------|--------------|-----------------------------------------------------------------------------------------|-----------------------------------------------------------------------------------------------------------------------------------------------------------------------------------|---------------------|--------|--|----|----|----------------------|-----------|------------------------------------------|--|--|--|--|--|--|--------------------------------------------------------------------------------------|------|------|-------------------------------------------------------------------------------------------------------------------|
|                        |        |  |        |      | ) Consortium |                                                                                         |                                                                                                                                                                                   |                     |        |  |    |    |                      |           |                                          |  |  |  |  |  |  |                                                                                      |      |      |                                                                                                                   |
| breast_cancer          | 359082 |  | Conlon | 2010 |              | Population within the catchment area of the Northeastern Ontario REgional Cancer Centre | Canada                                                                                                                                                                            | Case-control        | Female |  | 25 | 75 | Mailed questionnaire | Incidence | Ontario Cancer Registry                  |  |  |  |  |  |  | Histologically-confirmed primary invasive breast cancer (ICD-9 174)                  | 347  | 775  | Female resident of the NEORCC catchment area who has never been diagnosed with breast cancer and aged 25-75 years |
| other_pharynx_cancer   | 364113 |  | Lubin  | 2010 |              | Cases and controls from 15 case-control studies                                         | Italy, Switzerland, Slovakia, Romania, Hungary, Poland, Russia, United States, Puerto Rico, Argentina, Cuba, Brazil, Spain, Ireland, Canada, Australia, India, Sudan, South Sudan | Pooled case-control | Both   |  | 18 | 99 | Subject interview    | Incidence | Administrative records, disease registry |  |  |  |  |  |  | Pharynx cancer (invasive cancer of the oropharynx, hypopharynx, unspecified pharynx) | 2277 | 9502 | Hospital patients and general population                                                                          |
| lip_oral_cavity_cancer | 364113 |  | Lubin  | 2010 |              | Cases and controls from 15 case-control studies                                         | Italy, Switzerland, Slovakia, Romania, Hungary, Poland, Russia, United States, Puerto Rico, Argentina, Cuba, Brazil,                                                              | Pooled case-control | Both   |  | 18 | 99 | Subject interview    | Incidence | Administrative records, disease registry |  |  |  |  |  |  | Oral cavity cancer (invasive tumor of the oral cavity or unspecified oral cavity)    | 1872 | 9502 | Hospital patients and general population                                                                          |

|     |        |  |            |      |                             |                                                                                                                                                                                               |                |                    |      |     |    |    |                                 |            |                                         |  |     |       |                                                   |      |      |                         |  |     |
|-----|--------|--|------------|------|-----------------------------|-----------------------------------------------------------------------------------------------------------------------------------------------------------------------------------------------|----------------|--------------------|------|-----|----|----|---------------------------------|------------|-----------------------------------------|--|-----|-------|---------------------------------------------------|------|------|-------------------------|--|-----|
|     |        |  |            |      |                             | Spain, Ireland, Canada, Australia, India, Sudan, South Sudan                                                                                                                                  |                |                    |      |     |    |    |                                 |            |                                         |  |     |       |                                                   |      |      |                         |  |     |
| cvd | 359221 |  | St-Pierre  | 2010 | Quebec Cardiovascular Study | Residents of seven Quebec suburbs                                                                                                                                                             | Canada         | Prospective cohort | Male | 24  | 35 | 64 | Self-reported                   | Incidence  | Medical evaluation                      |  | 300 | 4076  | Intermittent claudication                         |      |      |                         |  |     |
| cvd | 359223 |  | Lakshmanan | 2010 | Health in Men Study         | Men on the Western Australia electoral roll                                                                                                                                                   | Australia      | Prospective cohort | Male | 5.7 | 65 | 83 | Administered questionnaire      | Incidence  | Self-reported and medical record review |  | 638 | 11332 | Peripheral arterial disease                       |      |      |                         |  |     |
| cvd | 463822 |  | Koshy      | 2010 |                             | Patients from Sree Chitra Tirunal Institute of Medical Science and Technology and Ananthapuri Hospitals and Research Institute at Thiruvananthapuram and Calicut Medical College at Kozhikode | India          | Case-control       | Both | 27  | 76 |    | Structured questionnaire        | Incidence  | Clinical diagnosis                      |  |     |       | Subarachnoid hemorrhage                           | 163  | 150  | Hospital                |  |     |
| cvd | 463859 |  | O'Donnell  | 2010 |                             | Patients recruited from 84 centers in 22 countries                                                                                                                                            | Multi-location | Case-control       | Both | 28  | 92 |    | Structured questionnaire        | Incidence  | Clinical diagnosis                      |  |     |       | Ischemic stroke; Intracerebral hemorrhage; Stroke | 3000 | 3000 | Hospital and population |  |     |
| cvd | 115580 |  | Alzamora   | 2010 |                             | General population of the city of Barcelona and the county of Barcelones                                                                                                                      | Spain          | Cross-sectional    | Both | 47  | 82 |    | Self-administered questionnaire | Prevalence | Biomarker                               |  | 286 | 3786  | Peripheral artery disease                         |      |      |                         |  | 624 |

|                |        |  |                   |      |  |                                                                                                                        |                         |                    |      |    |    |    |                                 |                       |                              |  |    |     |                   |      |        |                                                                                                                   |  |
|----------------|--------|--|-------------------|------|--|------------------------------------------------------------------------------------------------------------------------|-------------------------|--------------------|------|----|----|----|---------------------------------|-----------------------|------------------------------|--|----|-----|-------------------|------|--------|-------------------------------------------------------------------------------------------------------------------|--|
|                |        |  |                   |      |  | Nord-Maresme                                                                                                           |                         |                    |      |    |    |    |                                 |                       |                              |  |    |     |                   |      |        |                                                                                                                   |  |
| parkinson      | 359157 |  | Chen              | 2010 |  | AARP members from six US states and 2 metropolitan areas                                                               | United States           | Case-control       | Both |    | 50 | 71 | Self-administered questionnaire | Incidence             | Self-report, medical records |  |    |     | Parkinson disease | 1662 | 303806 | Portion of cohort who were not cases                                                                              |  |
| bladder_cancer | 502466 |  | Meliker           | 2010 |  | Residents in Genesee, Huron, Ingham, Jackson, Lapeer, Livingston, Oakland, Sanilac, Shiawassee, Tuscola, and Washtenaw | Michigan, United States | Case-control       | Both |    | 21 | 80 | Telephone interview             | Incidence             | Cancer registry              |  |    |     | Bladder cancer    | 411  | 566    | From telephone directories, automobile and motorcycle registries, real estate listings, and driver's license data |  |
| lung_cancer    | 502241 |  | Naghizadeh-Tahami | 2010 |  | "incident lung cancer cases from Cheng Ching General Hospital and Tungs' Taichung MetroHarbor Hospital in central      | Iran                    | case-control       | Both |    | 40 | 80 | self-administered questionnaire | Incidence             | Disease Registry - Cancer    |  |    |     | Lung cancer       | 242  | 242    | Hospital Visitor                                                                                                  |  |
| copd           | 356165 |  | Forey             | 2011 |  | General adult population                                                                                               | Multiple locations      | Meta-analysis      | Both |    | 18 | 99 | Unknown                         | Incidence & Mortality | Depends on underlying study  |  |    |     |                   |      |        |                                                                                                                   |  |
| copd           | 356342 |  | Omori             | 2011 |  | Population which would attend a health screening examination at the Japanese Red Cross                                 | Japan                   | Prospective cohort | Male | 12 | 30 | 76 | Interview                       | Incidence             | Biomarker                    |  | 91 | 913 | COPD              |      |        |                                                                                                                   |  |

|                           |        |  |              |      |                                   |                                                                                               |                           |                    |        |      |    |    |                                 |                        |                                                  |        |      |       |                                       |      |      |                    |  |
|---------------------------|--------|--|--------------|------|-----------------------------------|-----------------------------------------------------------------------------------------------|---------------------------|--------------------|--------|------|----|----|---------------------------------|------------------------|--------------------------------------------------|--------|------|-------|---------------------------------------|------|------|--------------------|--|
|                           |        |  |              |      | Kumamoto Health Care Center       |                                                                                               |                           |                    |        |      |    |    |                                 |                        |                                                  |        |      |       |                                       |      |      |                    |  |
| ihd                       | 335762 |  | Zhang        | 2011 | MONICA/KORA Augsburg Cohort Study | Residents of Augsburg and two adjacent counties                                               | Germany                   | Prospective cohort | Both   | 13.3 | 25 | 74 | Face-to-face interview          | Incidence or Mortality | Disease registry, vital records, medical records |        | 387  | 8296  | Myocardial infarction                 |      |      |                    |  |
| stroke                    | 334814 |  | Kondo        | 2011 |                                   | Male Japanese workers                                                                         | Japan                     | Prospective cohort | Male   | 7.5  | 20 | 61 | Administered interviews         | Mortality              | Medical records, vital records                   | 116053 | 73   | 25464 | Stroke                                |      |      |                    |  |
| peripheral_artery_disease | 350659 |  | Conen        | 2011 | Women's Health Study              | Female healthcare professionals                                                               | United States             | Prospective cohort | Female | 12.7 | 45 | 99 | Baseline questionnaire          | Incidence              | Self-reported and medical record review          | 507329 | 178  | 39825 | Symptomatic peripheral artery disease |      |      |                    |  |
| alzheimr_other_dementia   | 328517 |  | Rusanen      | 2011 | Kaiser Permanente                 | Members of the Kaiser Permanente Medical Care Program of Northern California                  | California, United States | Prospective cohort | Both   | 23   | 50 | 60 | Personal interview              | Incidence              | Clinical records, physician diagnosis            |        | 5367 | 21123 | Dementia                              |      |      |                    |  |
| breast_cancer             | 310352 |  | Luo          | 2011 | Women's Health Initiative         | General female postmenopausal population                                                      | United States             | Prospective cohort | Female | 10.3 | 50 | 79 | Self-administered questionnaire | Incidence              | Self-report, medical records                     |        | 3250 | 79990 | Invasive breast cancer                |      |      |                    |  |
| lung_cancer               | 358565 |  | Papadopoulos | 2011 |                                   | Female residents in 10 of the 11 French departements                                          | France                    | Case-control       | Female |      | 18 | 76 | Administered questionnaire      | Incidence              | Pathology reports and clinical records           |        |      |       | Lung cancer                           | 648  | 1423 | Population         |  |
| nasopharyngeal_cancer     | 346056 |  | Ji           | 2011 |                                   | Han Chinese patients recruited from the Zhongman Hospital of Wuhan University in Wuhan, China | Hubei, China              | Case-control       | Both   |      | 15 | 99 | Self-administered questionnaire | Incidence              | Histologically confirmed cases                   |        |      |       | Nasopharyngeal carcinoma              | 1044 | 1095 | General population |  |

|     |        |  |               |      |                                                      |                                                                                        |                 |                     |      |       |    |    |                                 |                        |                                                                  |        |     |       |                                 |      |       |                   |     |
|-----|--------|--|---------------|------|------------------------------------------------------|----------------------------------------------------------------------------------------|-----------------|---------------------|------|-------|----|----|---------------------------------|------------------------|------------------------------------------------------------------|--------|-----|-------|---------------------------------|------|-------|-------------------|-----|
| cvd | 334814 |  | Kondo         | 2011 |                                                      | Male Japanese workers                                                                  | Japan           | Prospective cohort  | Male | 7.5   | 20 | 61 | Administered interviews         | Mortality              | Medical records, vital records                                   | 116053 | 73  | 25464 | Stroke                          |      |       |                   |     |
| cvd | 350087 |  | Chamberlain   | 2011 | The Atherosclerosis Risk in Communities (ARIC) Study | Black and white adults from four US communities                                        | United States   | Prospective cohort  | Both | 13.1  | 45 | 64 | Home and telephone interviews   | Incidence              | ECG results, hospital records, vital records                     | 201355 | 876 | 15329 | Atrial fibrillation and flutter |      |       |                   |     |
| cvd | 437404 |  | Merry         | 2011 | CAREMA                                               | Residents of the Maastricht region covered by the PPHVZ and MORGEN monitoring projects | The Netherlands | Prospective cohort  | Both | 11.1  | 20 | 59 | Self-administered questionnaire | Incidence or Mortality | Vital records, hospital records                                  | 209573 | 420 | 19096 | Ischemic heart disease          |      |       |                   |     |
| cvd | 464362 |  | Ji            | 2011 | Beijing Iron and Steel Complex                       | Male steelworkers                                                                      | China           | Prospective cohort  | Male | 20.84 | 18 | 74 | Clinical interview              | Incidence or Mortality | Self-reported, hospital records, vital records, clinical reports | 86288  | 391 | 4238  | Cardiovascular diseases         |      |       |                   |     |
| cvd | 463814 |  | Martin        | 2011 |                                                      | Residents in the UK primary care database                                              | United Kingdom  | Nested case-control | Both | 40    | 84 |    | Interview                       | Incidence              | Medical records                                                  |        |     |       | Ischemic stroke                 | 2953 | 10000 | Cohort population |     |
| cvd | 463816 |  | Debette       | 2011 |                                                      | Patients from neurology departments in 18 centers across 8 countries                   | Multi-location  | Case-control        | Both | 24    | 68 |    | Structured questionnaire        | Incidence              | Disease registry                                                 |        |     |       | Ischemic stroke                 | 556  | 1170  | Population        |     |
| cvd | 465263 |  | Lee           | 2011 |                                                      | Male population residing in the Dong-gu district of Gwangju Metropolitan City          | South Korea     | Cross-sectional     | Male | 51    | 82 |    | Interview                       | Prevalence             | Biomarker                                                        |        | 103 | 2517  | Peripheral artery disease       |      |       |                   | 603 |
| cvd | 465265 |  | Taylor-Piliae | 2011 |                                                      | Older members of Kaiser                                                                | United States   | Cross-sectional     | Both | 60    | 69 |    | Mailed questionnaire            | Prevalence             | Biomarker                                                        |        | 22  | 1017  | Peripheral artery disease       |      |       |                   | 76  |

|                |        |  |            |      |                      |                                                                          |                   |                     |        |      |    |    |                                 |           |                                                           |         |      |        |                        |       |       |                                                                             |  |
|----------------|--------|--|------------|------|----------------------|--------------------------------------------------------------------------|-------------------|---------------------|--------|------|----|----|---------------------------------|-----------|-----------------------------------------------------------|---------|------|--------|------------------------|-------|-------|-----------------------------------------------------------------------------|--|
|                |        |  |            |      |                      | Permanente of Northern California                                        |                   |                     |        |      |    |    |                                 |           |                                                           |         |      |        |                        |       |       |                                                                             |  |
| bladder_cancer | 502437 |  | Zheng      | 2011 |                      | Hospital patients from three referral cancer centers                     | Egypt             | Case-control        | Both   |      | 19 | 80 | Structured interview            | Incidence | Physician diagnosis                                       |         |      |        | Bladder cancer         | 1988  | 2716  | General population                                                          |  |
| breast_cancer  | 310353 |  | Xue        | 2011 | Nurses' Health Study | Married female nurses living in eleven states                            | United States     | Prospective cohort  | Female | 30   | 30 | 55 | Questionnaire                   | Incidence | Self-report, medical records, vital records,              | 3005863 | 8772 | 111140 | Invasive breast cancer |       |       |                                                                             |  |
| diabetes       | 255434 |  | Doi        | 2012 |                      | Residents in the town of Hisayama, Japan                                 | Japan             | Prospective cohort  | Both   | 11.8 | 40 | 79 | Self-administered questionnaire | Incidence | Physician diagnosis                                       |         | 286  | 1935   | Type 2 diabetes        |       |       |                                                                             |  |
| diabetes       | 309584 |  | Teratini   | 2012 |                      | Male workers at a Japanese steel company                                 | Chiba, Japan      | Prospective cohort  | Male   | 4.4  | 18 | 99 | Self-administered questionnaire | Incidence | Physician diagnosis, medical records                      | 37311   | 644  | 8423   | Diabetes mellitus      |       |       |                                                                             |  |
| lung_cancer    | 355970 |  | Pesch      | 2012 |                      | Eight European and one Canadian case-control studies in SYNERGY database | Europe and Canada | Pooled case-control | Both   |      | 18 | 99 | Administered interview          | Incidence | Clinical records                                          |         |      |        | Lung cancer            | 13168 | 16008 | Varied                                                                      |  |
| lung_cancer    | 358552 |  | De Matteis | 2012 |                      | Cases and population controls in 216 municipalities in Lombardy          | Italy             | Case-control        | Both   |      | 35 | 79 | Computer-assisted interview     | Incidence | Tissue pathology, cytology, or review of clinical records |         |      |        | Lung cancer            | 1943  | 4059  | Population                                                                  |  |
| tb             | 369826 |  | Alavi      | 2012 |                      | Population who would attend the Boo-Ali Hospital in Zahedan              | Iran              | Case-control        | Both   |      | 18 | 99 | Administered questionnaire      | Incidence | Physician diagnosis, biomarker                            |         |      |        | Pulmonary tuberculosis | 253   | 312   | Subjects who attended Boo-Ali Hospital and underwent a physical examination |  |

|                       |        |           |      |                           |                                                                                                       |               |                    |        |          |    |                            |                            |                                                              |                                                     |        |     |                                                                                  |                        |      |                                                                                                                                             |
|-----------------------|--------|-----------|------|---------------------------|-------------------------------------------------------------------------------------------------------|---------------|--------------------|--------|----------|----|----------------------------|----------------------------|--------------------------------------------------------------|-----------------------------------------------------|--------|-----|----------------------------------------------------------------------------------|------------------------|------|---------------------------------------------------------------------------------------------------------------------------------------------|
| nasopharyngeal_cancer | 346071 | Fachiroh  | 2012 |                           | Cases from seven regional cancer centers in Thailand and controls were those who visited the patients | Thailand      | Case-control       | Both   | 18       | 99 | Personal interview         | Incidence                  | Clinically and pathologically confirmed cases                |                                                     |        |     | Nasopharyngeal carcinoma (ICD-O, C11)                                            | 681                    | 1078 | Residents who visited patients admitted in the health centers                                                                               |
| peptic_ulcer          | 349542 | Al-Zubeer | 2012 |                           | Mosul city                                                                                            | Iraq          | Case-control       | Both   | 18       | 99 | Questionnaire              | Incidence                  | Physician diagnosis                                          |                                                     |        |     | Superficial or deep, single or multiple, duodenal, gastric, or esophageal ulcers | 180                    | 240  | Healthy people from the community; medical students and their friends and family; relatives of patients (without peptic ulcer or gastritis) |
| cvd                   | 463665 | Bertoia   | 2012 | Women's Health Initiative | Participants in 40 study sites                                                                        | United States | Prospective cohort | Female | 10.8     |    | Standardized questionnaire | Mortality                  | Medical records, vital records, autopsy reports, lab reports | 418                                                 | 160291 |     | Ischemic heart disease                                                           |                        |      |                                                                                                                                             |
| cvd                   | 465158 | Xu        | 2012 | Strong Heart Study        | American Indians in three geographic regions                                                          | United States | Prospective cohort | Both   | 6.3-17.4 | 54 | 74                         | Administered questionnaire | Incidence or Mortality                                       | Surveillance, physical examination, medical records | 44184  | 761 | 3563                                                                             | Ischemic heart disease |      |                                                                                                                                             |
| cvd                   | 350745 | Kim       | 2012 |                           | Patients from 33 hospitals throughout the Republic of Korea and their siblings/friends                | South Korea   | Case-control       | Both   | 30       | 84 | Administered questionnaire | Incidence                  | Medical diagnosis                                            |                                                     |        |     | Subarachnoid hemorrhage                                                          | 426                    | 426  | Population                                                                                                                                  |

|                 |        |  |          |      |                                                                     |                                                                                 |                                                                                                 |                     |      |      |      |      |                                 |                       |                                                           |         |      |         |                           |     |     |                   |     |
|-----------------|--------|--|----------|------|---------------------------------------------------------------------|---------------------------------------------------------------------------------|-------------------------------------------------------------------------------------------------|---------------------|------|------|------|------|---------------------------------|-----------------------|-----------------------------------------------------------|---------|------|---------|---------------------------|-----|-----|-------------------|-----|
| cvd             | 463669 |  | Ohira    | 2012 |                                                                     | Japanese residents from the Ikawa, Noichi, Kyowa, and Yao communities           | Multi-location                                                                                  | Nested case-control | Both | 30   | 84   |      | Interview                       | Incidence             | Medical records, vital records                            |         |      |         | Ischemic heart disease    | 239 | 717 | Cohort population |     |
| cvd             | 463789 |  | Shiue    | 2012 |                                                                     | Residents from Adelaide, Hobart, and Perth, Australia and Auckland, New Zealand | Australia                                                                                       | Case-control        | Both | 29   | 83   |      | Interview                       | Incidence             | Medical records, discharge records, vital records         |         |      |         | Subarachnoid hemorrhage   | 432 | 473 | Population        |     |
| cvd             | 464955 |  | Duval    | 2012 |                                                                     | Outpatients from clinics in 44 countries                                        | Multi-locations                                                                                 | Cross-sectional     | Both | 50   | 90   |      | Self-report                     | Prevalence            | Self-report, medical records                              |         | 2113 | 23169   | Peripheral artery disease |     |     |                   | 452 |
| lung_cancer     | 426275 |  | Thun     | 2013 |                                                                     | Participants from 7 US-based cohort studies                                     | United States                                                                                   | Prospective cohort  | Both | 30   | 55   | 99   | Administered questionnaire      | Mortality             | Disease registry                                          | 5724508 | 5905 | 1463295 | Lung cancer               |     |     |                   |     |
| lung_cancer     | 328215 |  | Bae      | 2013 | Seoul Male Cancer Cohort                                            | Male beneficiaries of Korean Medical Insurance Corporation                      | Republic of Korea                                                                               | Prospective cohort  | Male | 16   | 40   | 75   | Self-administered questionnaire | Incidence             | Disease registries                                        | 203870  | 123  | 14272   | Lung cancer               |     |     |                   |     |
| lung_cancer     | 358558 |  | He       | 2013 |                                                                     | Workers at a machinery factor in Xi'an                                          | China                                                                                           | Prospective cohort  | Both | 35   | 33.5 | 69.8 | Administered interviews         | Mortality             | Histopathological, clinical, or radiological diagnoses    | 22076   | 45   | 1494    | Lung cancer               |     |     |                   |     |
| prostate_cancer | 359185 |  | Rohrmann | 2013 | European Prospective Investigation into Cancer and Nutrition (EPIC) | Dependent on location                                                           | Denmark, France, Germany, United Kingdom, Greece, Italy, The Netherlands, Spain, Norway, Sweden | Prospective cohort  | Male | 11.9 |      |      | Questionnaire                   | Incidence & Mortality | Disease registry, health insurance records, vital records |         | 4623 | 145112  | Prostate cancer           |     |     |                   |     |



|        |        |  |               |      |                                  |                                                                             |                                  |                           |        |      |    |    |                                   |                              |                                                                    |          |       |         |                                                     |  |  |  |  |
|--------|--------|--|---------------|------|----------------------------------|-----------------------------------------------------------------------------|----------------------------------|---------------------------|--------|------|----|----|-----------------------------------|------------------------------|--------------------------------------------------------------------|----------|-------|---------|-----------------------------------------------------|--|--|--|--|
| copd   | 426275 |  | Thun          | 2013 | Cancer Prevention Study (CPS) II | All 50 states of the United States, District of Columbia, Puerto Rico, Guam | United States, Puerto Rico, Guam | Prospective cohort        | Both   | 5.2  | 55 | 99 | Mailed questionnaire              | Mortality                    | Death certificates                                                 | 3952920  | 2100  | 758097  | COPD                                                |  |  |  |  |
| copd   | 426275 |  | Thun          | 2013 | Women's Health Initiative (WHI)  | General female population across the United States                          | United States                    | Prospective cohort        | Female | 10   | 55 | 79 | Survey                            | Mortality                    | Death certificates                                                 |          | 704   | 150864  | COPD                                                |  |  |  |  |
| ihd    | 236197 |  | Pirie         | 2013 | Million Women Study              | Participants of the National Health Service Breast Screening Programme      | United Kingdom                   | Prospective cohort        | Female | 12   | 50 | 69 | Questionnaire                     | Mortality                    | Vital records                                                      |          | 4458  | 1180652 | Coronary heart disease (I21-25)                     |  |  |  |  |
| ihd    | 249384 |  | Iversen       | 2013 | Tromso Study                     | Residents in the municipality of Tromso                                     | Norway                           | Prospective cohort        | Both   | 11   | 25 | 99 | Self-administered questionnaire   | Hospitalization or Mortality | Discharge records, Medical records, Vital records, Autopsy reports |          | 1222  | 24968   | Myocardial infarction (ICD-10 I20-I25, R96, R98-99) |  |  |  |  |
| ihd    | 335266 |  | Molshatzki    | 2013 |                                  | Civil servants and municipal employees                                      | Israel                           | Prospective cohort        | Male   | 28.1 | 40 | 99 | Administered questionnaire        | Mortality                    | Vital records, hospital records                                    | 257442   | 1769  | 10059   | Coronary heart disease (ICD 410, 411, 414, 798)     |  |  |  |  |
| ihd    | 336216 |  | Thun          | 2013 | HPFS; Women's Health Initiative  | Varied                                                                      | United States                    | Pooled prospective cohort | Both   | 10   | 55 | 99 | Varied                            | Mortality                    | Vital records                                                      |          | 3767  | 190695  | Ischemic heart disease                              |  |  |  |  |
| stroke | 350757 |  | Xu            | 2013 |                                  | Elderly residents of Hong Kong                                              | Hong Kong                        | Prospective cohort        | Both   | 10.9 | 65 | 99 | Standardized structured interview | Mortality                    | Vital records, telephone interviews                                |          | 648   | 65510   | Hemorrhagic stroke                                  |  |  |  |  |
| stroke | 356591 |  | Hippisley-Cox | 2013 |                                  | Patients from general practices in England and Wales                        | United Kingdom                   | Prospective cohort        | Both   | 7    | 25 | 84 | Medical records                   | Incidence                    | Medical records, vital records                                     | 24800000 | 77578 | 3549478 | First incidence of stroke or transient ischemic     |  |  |  |  |



|                         |        |  |         |      |                                                                     |                                                                                                                                                                                                                                                   |                                                                                                     |                    |        |      |    |    |                                      |                       |                                                                                    |         |      |        |                                           |  |  |  |  |  |
|-------------------------|--------|--|---------|------|---------------------------------------------------------------------|---------------------------------------------------------------------------------------------------------------------------------------------------------------------------------------------------------------------------------------------------|-----------------------------------------------------------------------------------------------------|--------------------|--------|------|----|----|--------------------------------------|-----------------------|------------------------------------------------------------------------------------|---------|------|--------|-------------------------------------------|--|--|--|--|--|
| aortic_aneurism         | 358857 |  | Sode    | 2013 | Copenhagen City Heart Study and Copenhagen General Population Study | Randomly selected white individuals of Danish descent                                                                                                                                                                                             | Denmark                                                                                             | Prospective cohort | Both   | 34   | 20 | 99 | Self-administered questionnaire      | Incidence & Mortality | Disease registry, vital records                                                    |         | 504  | 71283  | Aortic aneurysm (ICD-8, 441; ICD-10, I71) |  |  |  |  |  |
| breast_cancer           | 358689 |  | Lemogne | 2013 | Gaz et Electricité (GAZEL) Cohort Study                             | Employees of the French national gas and electricity company                                                                                                                                                                                      | France                                                                                              | Prospective cohort | Female | 15.2 | 35 | 50 | Mailed questionnaire                 | Incidence             | Registry at the medical department of the French national gas and electric company |         | 138  | 3697   | Breast cancer                             |  |  |  |  |  |
| cervical_cancer         | 358583 |  | Roura   | 2013 | European Prospective Investigation into Cancer and Nutrition (EPIC) | Residents of study areas (France: enrollees in a health insurance scheme of academic employees, the Netherlands and Italy (partial): participants of a breast cancer screening program, Italy (partial) and Spain: blood donors, UK: vegetarians) | Denmark, France, Germany, Greece, Italy, the Netherlands, Norway, Spain, Sweden, the United Kingdom | Prospective cohort | Female | 9    | 35 | 70 | Medical and lifestyle questionnaires | Primary incidence     | Health insurance records, disease registry, active follow-up                       | 2775235 | 1065 | 308036 | Cervix uteri cancer (ICD-10 C53)          |  |  |  |  |  |
| colon_and_rectum_cancer | 358689 |  | Lemogne | 2013 | Gaz et Electricité (GAZEL) Cohort Study                             | Empolyees of the French national gas and electricity company                                                                                                                                                                                      | France                                                                                              | Prospective cohort | Both   | 15.2 | 35 | 50 | Mailed questionnaire                 | Incidence             | Registry at the medical department of the French national gas and electric company | 215886  | 125  | 14203  | Colorectal cancer                         |  |  |  |  |  |

|                        |        |  |             |      |                                                                 |                                                                                                                       |           |                     |        |      |    |    |                                 |           |                                                                                                      |         |     |       |                                               |      |      |                                                                                                    |  |
|------------------------|--------|--|-------------|------|-----------------------------------------------------------------|-----------------------------------------------------------------------------------------------------------------------|-----------|---------------------|--------|------|----|----|---------------------------------|-----------|------------------------------------------------------------------------------------------------------|---------|-----|-------|-----------------------------------------------|------|------|----------------------------------------------------------------------------------------------------|--|
| pancreatic_cancer      | 359135 |  | Lin         | 2013 | Japan Collaborative Cohort Study (JACC)                         | Residents from 45 areas throughout Japan                                                                              | Japan     | Prospective cohort  | Both   | 19   | 40 | 79 | Self-administered questionnaire | Mortality | Vital records                                                                                        | 1594210 | 611 | 98354 | Pancreatic cancer (ICD-10, C25)               |      |      |                                                                                                    |  |
| pancreatic_cancer      | 359140 |  | Kuzmickiene | 2013 | Multifactorial Ischemic Heart Disease Prevention Study (MIHDPS) | Male residents of the city of Kaunas                                                                                  | Lithuania | Prospective cohort  | Male   | 19.3 | 40 | 59 | Personal interview              | Incidence | Disease registry, vital records                                                                      |         | 77  | 7132  | Pancreatic cancer (ICD-9, 157 or ICD-10, C25) |      |      |                                                                                                    |  |
| rheumatoid_arthritis   | 350653 |  | Di Giuseppe | 2013 | Swedish Mammography Cohort                                      | All females born between 1914 and 1948 and residing in two Swedish counties (Uppsala and Vastmanland)                 | Sweden    | Prospective cohort  | Female | 7.5  | 54 | 89 | Mailed questionnaire            | Incidence | Medical registers                                                                                    | 254996  | 219 | 34101 | Rheumatoid arthritis                          |      |      |                                                                                                    |  |
| prostate_cancer        | 358689 |  | Lemogne     | 2013 | Gaz et Electricité (GAZEL) Cohort Study                         | Employees of the French national gas and electric company                                                             | France    | Prospective cohort  | Male   | 15.2 | 40 | 50 | Mailed questionnaire            | Incidence | Registry kept in the medical department of the French national gas and electric company, self-report |         | 412 | 10506 | Primary prostate cancer                       |      |      |                                                                                                    |  |
| multiple_sclerosis     | 348023 |  | Hedstrom    | 2013 |                                                                 | Residents of defined study areas                                                                                      | Sweden    | Pooled case-control | Both   |      | 16 | 70 | Standardized questionnaire      | Incidence | Disease registry, hospital records                                                                   |         |     |       | Multiple sclerosis                            | 7883 | 9264 | Population                                                                                         |  |
| lip_oral_cavity_cancer | 359126 |  | Fu          | 2013 |                                                                 | Hospitalized residents admitted to eight different hospitals location in Beijing, Shanghai, Shandong, Jiangsu, Hunan, | China     | Case-control        | Male   |      | 31 | 99 | Subject interview               | Incidence | Primary pathologicaly-confirmed diagnosis                                                            |         |     |       | Oral squamous cell carcinoma                  | 319  | 428  | Hospital patients from oral and maxillofacial surgery department, head and neck surgery department |  |

|     |        |  |         |      |                                                                                                                                             |                                                                        |                |                           |        |        |    |    |                                   |                        |                                               |         |       |         |                                                                |  |                                                 |  |
|-----|--------|--|---------|------|---------------------------------------------------------------------------------------------------------------------------------------------|------------------------------------------------------------------------|----------------|---------------------------|--------|--------|----|----|-----------------------------------|------------------------|-----------------------------------------------|---------|-------|---------|----------------------------------------------------------------|--|-------------------------------------------------|--|
|     |        |  |         |      | Hubei, Guangdong, Guangxi                                                                                                                   |                                                                        |                |                           |        |        |    |    |                                   |                        |                                               |         |       |         |                                                                |  | nt, orthognatic surgery department, trauma ward |  |
| cvd | 236197 |  | Pirie   | 2013 | Million Women Study                                                                                                                         | Participants of the National Health Service Breast Screening Programme | United Kingdom | Prospective cohort        | Female | 12     | 50 | 69 | Self-administered questionnaire   | Mortality              | Vital records                                 |         | 4952  | 1180652 | Coronary heart disease (I21-25), Aortic aneurysm (ICD-10, I71) |  |                                                 |  |
| cvd | 336216 |  | Thun    | 2013 | HPFS; Women's Health Initiative                                                                                                             | Varied                                                                 | United States  | Pooled prospective cohort | Both   | 10     | 55 | 99 | Varied                            | Mortality              | Vital records                                 |         | 3767  | 190695  | Ischemic heart disease                                         |  |                                                 |  |
| cvd | 336216 |  | Thun    | 2013 | CPS I; CPS II; NIH-AARP; ACS CPS II Nutrition Cohort; Women's Health Initiative; Nurses' Health Study; Health Professionals Follow-up Study | Varied                                                                 | United States  | Pooled prospective cohort | Both   | 10-Jun | 18 | 99 | Varied                            | Mortality              | Vital records                                 |         | 17463 | 2222223 | Any type of stroke                                             |  |                                                 |  |
| cvd | 350757 |  | Xu      | 2013 |                                                                                                                                             | Elderly residents of Hong Kong                                         | Hong Kong      | Prospective cohort        | Both   | 10.9   | 65 | 99 | Standardized structured interview | Mortality              | Vital records, telephone interviews           |         | 648   | 65510   | Hemorrhagic stroke                                             |  |                                                 |  |
| cvd | 334964 |  | Gellert | 2013 | ESTHER                                                                                                                                      | Residents of Saarland                                                  | Germany        | Prospective cohort        | Both   | 9.1    | 50 | 74 | Self-administered questionnaire   | Incidence or Mortality | Self-reported, clinical review, vital records |         | 647   | 5864    | Ischemic heart disease; Stroke; Cardiovascular diseases        |  |                                                 |  |
| cvd | 463346 |  | Gram    | 2013 | NOWAC                                                                                                                                       | Norwegian middle-aged women                                            | Norway         | Prospective cohort        | Female | 14     | 26 | 71 | Baseline questionnaire            | Mortality              | Vital records                                 | 1200000 | 426   | 85320   | Cardiovascular diseases; Ischemic                              |  |                                                 |  |

|               |        |  |          |      |                                                                                                |                                                                                                             |                 |                    |        |      |    |    |                                 |           |                                                |         |      |                       |                               |     |     |            |  |
|---------------|--------|--|----------|------|------------------------------------------------------------------------------------------------|-------------------------------------------------------------------------------------------------------------|-----------------|--------------------|--------|------|----|----|---------------------------------|-----------|------------------------------------------------|---------|------|-----------------------|-------------------------------|-----|-----|------------|--|
|               |        |  |          |      |                                                                                                |                                                                                                             |                 |                    |        |      |    |    |                                 |           |                                                |         |      | heart disease; Stroke |                               |     |     |            |  |
| cvd           | 463679 |  | Karppi   | 2013 | Kuopio Ischemic Heart Disease Risk Factor (KIHD) cohort                                        | Middle-aged men from Eastern Finland living in Kuopio and rural neighboring communities                     | Finland         | Prospective cohort | Male   | 15.9 | 42 | 60 | Self-administered questionnaire | Mortality | Hospital records, vital records, clinical data | 19393   | 59   | 1031                  | Ischemic heart disease        |     |     |            |  |
| cvd           | 330725 |  | Zhang    | 2013 |                                                                                                | Residents in Baotou, Inner Mongolia of China                                                                | China           | Case-control       | Both   | 28   | 87 |    | Interview                       | Incidence | Medical records                                |         |      |                       | Subarachnoid hemorrhage       | 226 | 434 | Population |  |
| cvd           | 463620 |  | Vlak     | 2013 |                                                                                                | Patients admitted at the Utrecht Stroke Centre of the University of Medical Center Utrecht                  | The Netherlands | Case-control       | Both   | 24   | 86 |    | Structured questionnaire        | Incidence | Clinical diagnosis                             |         |      |                       | Subarachnoid hemorrhage       | 250 | 574 | Hospital   |  |
| breast_cancer | 310343 |  | Bjerkaas | 2013 |                                                                                                | Norwegian women born between 1899 and 1975, recruited into three large Norwegian prospective cohort studies | Norway          | Prospective cohort | Female | 14   | 28 | 75 | Self-administered questionnaire | Incidence | Disease registry                               | 4164314 | 7490 | 302865                | Breast cancer (ICD-7: 170)    |     |     |            |  |
| lung_cancer   | 328909 |  | Everatt  | 2014 | Kunas-Rotterdam Intervention Study (KRIS) and Multifactorial Ischemic Heart Disease Prevention | Adult males in Kuanas                                                                                       | Lithuania       | Prospective cohort | Male   | 30   | 40 | 59 | Administered interview          | Incidence | Disease registry and vital records             | 1336424 | 1780 | 6976                  | Lung cancer (ICD C33-34, 162) |     |     |            |  |



|                         |        |  |       |      |                                                                                                                                                                                                                                                                                                 |               |                     |        |    |    |                                 |           |                                           |  |  |  |                                                                          |     |     |                                                                                              |  |
|-------------------------|--------|--|-------|------|-------------------------------------------------------------------------------------------------------------------------------------------------------------------------------------------------------------------------------------------------------------------------------------------------|---------------|---------------------|--------|----|----|---------------------------------|-----------|-------------------------------------------|--|--|--|--------------------------------------------------------------------------|-----|-----|----------------------------------------------------------------------------------------------|--|
|                         |        |  |       |      | attended departments of neurology at five hospitals in four areas of the Netherlands                                                                                                                                                                                                            |               |                     |        |    |    |                                 |           |                                           |  |  |  |                                                                          |     |     | among those who attended the same hospital department of neurology as the cases              |  |
| breast_cancer           | 359086 |  | Kawai | 2014 | Three-county Seattle-Puget Sound metropolitan areas (King, Pierce, Snohomish counties)                                                                                                                                                                                                          | United States | Case-control        | Female | 20 | 44 | Interview                       | Incidence | Cancer Surveillance System tumor registry |  |  |  | Invasive breast cancer                                                   | 960 | 939 | General female population who were residents of King, Pierce, and Snohomish counties         |  |
| colon_and_rectum_cancer | 358658 |  | Cross | 2014 | Adults aged 55-74 enrolled at ten different centers in the United States without prior cancer (except skin cancer), except those who developed a rare cancer during follow-up or self-reported Crohn's disease, ulcerative colitis, familial polyposis, Gardner's syndrome or colorectal polyps | United States | Nested case-control | Both   | 55 | 74 | Self-administered questionnaire | Incidence | Medical and pathologic reports            |  |  |  | Primary incident colorectal cancers (ICD-O-3 C180-189, C199, C209, C260) | 255 | 254 | Randomly sampled from the cohort who were free from any cancer at the time matched to a case |  |



|           |        |  |                  |      |                                |                                                                                                                                                                                                      |                             |                     |        |     |    |    |                            |                        |                                                      |  |     |      |                                             |     |     |                                                                                               |  |
|-----------|--------|--|------------------|------|--------------------------------|------------------------------------------------------------------------------------------------------------------------------------------------------------------------------------------------------|-----------------------------|---------------------|--------|-----|----|----|----------------------------|------------------------|------------------------------------------------------|--|-----|------|---------------------------------------------|-----|-----|-----------------------------------------------------------------------------------------------|--|
| cvd       | 343312 |  | Ehteshami-Afshar | 2014 | Tehran Lipid and Glucose Study | Residents of District 13 in Tehran                                                                                                                                                                   | Iran                        | Prospective cohort  | Male   | 9.3 | 30 | 99 | Administered questionnaire | Incidence or Mortality | Interview, medical records                           |  | 257 | 3059 | Definite and probable myocardial infarction |     |     |                                                                                               |  |
| cvd       | 464867 |  | Svensjo          | 2014 |                                | Males born in 1941 or 1942 in Uppsala county                                                                                                                                                         | Sweden                      | Prospective cohort  | Male   | 65  | 70 |    | Screening                  | Incidence              | Disease registry                                     |  | 87  | 2701 | Aortic aneurysm                             |     |     |                                                                                               |  |
| parkinson | 359154 |  | Van der Mark     | 2014 |                                | Population who attended departments of neurology at five hospitals in four areas of the Netherlands                                                                                                  | Netherlands                 | Case-control        | Both   |     | 34 | 91 | Telephone interview        | Incidence              | Hospital records                                     |  |     |      | Parkinson disease                           | 444 | 876 | Selected from among those who attended the same hospital department of neurology as the cases |  |
| fractures | 498378 |  | Bawab            | 2014 |                                | Cases of hip fracture as well as controls were recruited from 3 hospitals in Beirut (Al Zahraa, Al Makassed and Al Sahel) and 3 hospitals in south Lebanon (Jabal Amel, Lebanese Italian and Hiram). | Lebanon                     | Case-control        | Both   |     | 40 | 99 | Administered questionnaire | Incidence              | Medical reports                                      |  |     |      | Hip fracture                                | 65  | 130 | Controls were matched to cases by gender and region of residence                              |  |
| fractures | 498383 |  | Sommar           | 2014 |                                | Fracture cases were identified from a 12-year prospective injury-fracture                                                                                                                            | Västerbotten County, Sweden | Nested case-control | Female |     | 50 | 69 | Administered questionnaire | Incidence              | injury-fracture database at Umea University Hospital |  |     |      | Hip fracture                                | 158 | 314 | Controls were selected from the same NSHDS cohort and                                         |  |

|                          |        |  |               |      |                                                               |                                                         |                   |                           |      |      |    |    |                                 |                              |                                   |          |       |         |                                               |  |                                                                 |  |  |
|--------------------------|--------|--|---------------|------|---------------------------------------------------------------|---------------------------------------------------------|-------------------|---------------------------|------|------|----|----|---------------------------------|------------------------------|-----------------------------------|----------|-------|---------|-----------------------------------------------|--|-----------------------------------------------------------------|--|--|
|                          |        |  |               |      | database at the Umea University Hospital.                     |                                                         |                   |                           |      |      |    |    |                                 |                              |                                   |          |       |         |                                               |  | matched for sex, age at recruitment, and date of blood sampling |  |  |
| lung_cancer              | 321342 |  | Freedman      | 2015 | NIH-AARP                                                      | AARP members                                            | United States     | Prospective cohort        | Both | 11   | 50 | 71 | Self-administered questionnaire | Incidence                    | Disease registry                  |          | 1973  | 452131  | Lung cancer                                   |  |                                                                 |  |  |
| lung_cancer              | 413177 |  | Yun           | 2015 |                                                               | Government employees and teachers in Korea              | Republic of Korea | Prospective cohort        | Both | 12   | 20 | 99 | Self-administered questionnaire | Incidence                    | Disease registry                  | 16270692 | 6491  | 1355891 | Lung cancer                                   |  |                                                                 |  |  |
| ihd                      | 356114 |  | Schnohr       | 2015 | Copenhagen City Heart Study                                   | White residents of Copenhagen                           | Denmark           | Prospective cohort        | Both | 21.5 | 20 | 93 | Self-administered questionnaire | Hospitalization or Mortality | Vital records, patient registry   |          | 1731  | 8882    | Coronary heart disease (ICD 410-414, I20-I25) |  |                                                                 |  |  |
| ihd                      | 357254 |  | Hippisley-Cox | 2015 | QRResearch                                                    | Primary care patients                                   | United Kingdom    | Prospective cohort        | Both | 10   | 25 | 84 | Electronic medical record       | Incidence                    | Medical records, vital records    |          | 25480 | 437806  | Heart failure (ICD-10 I110, I130, I42, I50)   |  |                                                                 |  |  |
| diabetes                 | 356095 |  | Akter         | 2015 | Japan Epidemiology Collaboration on Occupational Health Study | Workers of 9 companies from various industries in Japan | Japan             | Prospective cohort        | Both | 5    | 15 | 84 | Self-administered questionnaire | Incidence                    | Physician diagnosis               |          | 2441  | 53930   | Type 2 diabetes                               |  |                                                                 |  |  |
| diabetes                 | 356097 |  | Hilawe        | 2015 | Aichi Workers' Cohort Study II                                | Civil servants in Aichi Prefecture                      | Japan             | Prospective cohort        | Both | 9    | 35 | 66 | Self-administered questionnaire | Incidence                    | Self-report, medical records      | 25140    | 310   | 3338    | Type 2 diabetes mellitus                      |  |                                                                 |  |  |
| alzheim_r_other_dementia | 328492 |  | Ohara         | 2015 | Hisayama Study                                                | Adult residents in the town of Hisayama                 | Japan             | Prospective cohort        | Both | 17   | 65 | 84 | Self-administered questionnaire | Incidence                    | Clinical records, autopsy records |          | 395   | 754     | All-cause Dementia, Alzheimers                |  |                                                                 |  |  |
| prostate_cancer          | 328210 |  | Meyer         | 2015 | National Research Program IA, Socio-Medical Indicators        | Swiss residents                                         | Switzerland       | Pooled prospective cohort | Male | 18.9 | 14 | 99 | Unspecified                     | Mortality                    | Vital records                     | 676309   | 170   | 35703   | Prostate cancer                               |  |                                                                 |  |  |

|                       |        |  |           |      |                                                                                                                                                          |                                                                                                            |                  |                     |      |      |    |    |                                 |           |                                |        |      |        |  |                                  |     |      |                                                                                             |
|-----------------------|--------|--|-----------|------|----------------------------------------------------------------------------------------------------------------------------------------------------------|------------------------------------------------------------------------------------------------------------|------------------|---------------------|------|------|----|----|---------------------------------|-----------|--------------------------------|--------|------|--------|--|----------------------------------|-----|------|---------------------------------------------------------------------------------------------|
|                       |        |  |           |      | for the Population of Switzerland (SOMIPOP S), Swiss Monitoring of trends and determinants in cardiovascular disease (MONICA), Swiss Health Survey (SHS) |                                                                                                            |                  |                     |      |      |    |    |                                 |           |                                |        |      |        |  |                                  |     |      |                                                                                             |
| prostate_cancer       | 359183 |  | Parker    | 2015 | Multiethnic Cohort Study                                                                                                                                 | Residents of Hawaii and California                                                                         | United States    | Prospective cohort  | Male | 13.9 | 45 | 75 | Self-administered questionnaire | Incidence | Disease registry               |        | 7115 | 75216  |  | Prostate cancer                  |     |      |                                                                                             |
| nasopharyngeal_cancer | 328921 |  | Lin       | 2015 | Guangzhou Occupational Cohort                                                                                                                            | Chinese factory workers and drivers in Guangzhou, China                                                    | Guangdong, China | Prospective cohort  | Both | 7.3  | 30 | 87 | Employee records                | Mortality | Medical records, vital records | 746159 | 34   | 101823 |  | Nasopharyngeal carcinoma (ICD-9) |     |      |                                                                                             |
| tb                    | 359228 |  | Marahatta | 2015 |                                                                                                                                                          | Population with tuberculosis in the central development region                                             | Nepal            | Case-control        | Both |      | 10 | 99 | Administered questionnaire      | Incidence | Physician diagnosis, biomarker |        |      |        |  | Multidrug resistant tuberculosis | 186 | 372  | New smear positive pulmonary tuberculosis cases as per Nepal national tuberculosis protocol |
| tb                    | 359273 |  | Smith     | 2015 |                                                                                                                                                          | Population who have health insurance through a health maintenance organization, like the Kaiser Permanente | United States    | Nested case-control | Both |      | 21 | 98 | Medical records                 | Incidence | Medical records                |        |      |        |  | Pulmonary tuberculosis disease   | 591 | 1098 | Kaiser Permanente Northern California members who were free of                              |

|                      |        |  |                   |      |                                 |                                                                                       |               |                     |      |      |    |               |                                 |                                                                                                                                                             |                                                  |          |        |                      |                                                                                                                                          |              |                                                                                   |  |
|----------------------|--------|--|-------------------|------|---------------------------------|---------------------------------------------------------------------------------------|---------------|---------------------|------|------|----|---------------|---------------------------------|-------------------------------------------------------------------------------------------------------------------------------------------------------------|--------------------------------------------------|----------|--------|----------------------|------------------------------------------------------------------------------------------------------------------------------------------|--------------|-----------------------------------------------------------------------------------|--|
|                      |        |  |                   |      | Northern California membership  |                                                                                       |               |                     |      |      |    |               |                                 |                                                                                                                                                             |                                                  |          |        |                      |                                                                                                                                          | tuberculosis |                                                                                   |  |
| rheumatoid arthritis | 353080 |  | Fisher            | 2015 |                                 | General population of four study sites: Murcia, Spain; Naples, Turin, Ragusa in Italy | Spain, Italy  | Nested case-control | Both | 18   | 99 | Questionnaire | Incidence                       | Primary health care records, prescription records, hospital discharge records, telephone follow-up of participants, then validated by medical record review |                                                  |          |        | Rheumatoid arthritis | 103                                                                                                                                      | 309          | Randomly chosen among cohort members, who were chosen from the general population |  |
| cvd                  | 356114 |  | Schnohr           | 2015 | Copenhagen City Heart Study     | White residents of Copenhagen                                                         | Denmark       | Prospective cohort  | Both | 21.5 | 20 | 93            | Self-administered questionnaire | Hospitalization or Mortality                                                                                                                                | Vital records, patient registry                  |          | 1731   | 8882                 | Coronary heart disease (ICD 410-414, I20-I25)                                                                                            |              |                                                                                   |  |
| cvd                  | 350755 |  | Pujades-Rodriguez | 2015 | CALIBER                         | Patients from general practices in England                                            | Great Britain | Prospective cohort  | Both | 5.5  | 40 | 74            | Self-reported in medical review | Incidence or Mortality                                                                                                                                      | Disease registry, vital records, medical records | 11600000 | 114859 | 1937360              | Ischemic heart disease; Ischemic stroke; Subarachnoid hemorrhage; Intracerebral hemorrhage; Peripheral vascular disease; Aortic aneurysm |              |                                                                                   |  |
| cvd                  | 465190 |  | Farzan            | 2015 | New Hampshire Skin Cancer Study | Participants of the case-control study on keratinocyte cancers                        | United States | Prospective cohort  | Both | 14   | 25 | 74            | Personal interview              | Mortality                                                                                                                                                   | Vital records                                    | 55034    | 312    | 3939                 | Cardiovascular diseases                                                                                                                  |              |                                                                                   |  |

|                 |        |  |            |      |                                            |                                                                                              |                                    |                    |        |      |    |    |                                                 |                        |                                                                        |         |       |                           |                                                                                        |      |            |                    |  |
|-----------------|--------|--|------------|------|--------------------------------------------|----------------------------------------------------------------------------------------------|------------------------------------|--------------------|--------|------|----|----|-------------------------------------------------|------------------------|------------------------------------------------------------------------|---------|-------|---------------------------|----------------------------------------------------------------------------------------|------|------------|--------------------|--|
| lung_cancer     | 502407 |  | Schwartz   | 2015 |                                            | newly diagnosed lung cancer patients at Hong Kong's biggest oncology center                  | Sao Paulo, Brazil                  | case-control       | Both   |      | 33 | 90 | administered interview                          | Incidence              | Histological confirmed cases                                           |         |       | lung cancer (ICD C33-C34) | 1208                                                                                   | 1069 | Population |                    |  |
| ihd             | 356141 |  | Lubin      | 2016 | Atherosclerosis Risk in Communities (ARIC) | Residents of four study areas                                                                | United States                      | Prospective cohort | Both   | 21   | 45 | 64 | Administered questionnaire, telephone interview | Incidence              | Hospital records, vital records, autopsy records, telephone interviews | 232002  | 2705  | 14127                     | Validated, definite, or probable myocardial infarction or coronary heart disease death |      |            |                    |  |
| stroke          | 350753 |  | Lindbohm   | 2016 | FINRISK study cohort                       | Finnish adults                                                                               | Finland                            | Prospective cohort | Both   | 14.8 | 18 | 99 | Self-administered questionnaire                 | Incidence or Mortality | Vital records, hospital discharge records, autopsy                     | 1380000 | 492   | 65521                     | Subarachnoid hemorrhage                                                                |      |            |                    |  |
| cataracts       | 359116 |  | Floud      | 2016 | Million Women Study                        | Postmenopausal women in England and Scotland                                                 | United Kingdom (England, Scotland) | Prospective cohort | Female | 10.7 | 50 | 64 | Self-administered questionnaire                 | Incidence              | Disease registry                                                       |         | 89343 | 1312051                   | Cataract surgery                                                                       |      |            |                    |  |
| prostate_cancer | 356281 |  | Taghizadeh | 2016 | Vlagtvedde - Vlaargdingen study            | White individuals of Dutch descent                                                           | Netherlands                        | Prospective cohort | Male   | 43   | 20 | 65 | Questionnaire                                   | Mortality              | Vital records                                                          |         | 83    | 8465                      | Prostate cancer                                                                        |      |            |                    |  |
| peptic_ulcer    | 359166 |  | Deding     | 2016 |                                            | Danish citizens who resided in eleven municipalities covering the entire of northern Jutland | Denmark                            | Prospective cohort | Both   | 2.75 | 17 | 99 | Self-administered questionnaire                 | Incidence              | National Patient Registry                                              |         | 121   | 17525                     | Duodenal or gastric peptic ulcer (ICD-10 K25-K27.9)                                    |      |            |                    |  |
| fractures       | 414201 |  | Thorin     | 2016 | Osteoporosis Risk Assessment study         | Female residents of Malmo                                                                    | Sweden                             | Prospective cohort | Female | 10   | 75 | 75 | Self-assessment questionnaire                   | Incidence              | Medical records                                                        |         | 420   | 1033                      | Fracture                                                                               |      |            |                    |  |
| diabetes        | 356099 |  | Hou        | 2016 |                                            | Chinese residents                                                                            | China                              | Case-control       | Male   |      | 20 | 98 | Self-administered questionnaire                 | Incidence              | Physician diagnosis                                                    |         |       |                           | Diabetes mellitus                                                                      | 1246 | 15040      | General population |  |

|               |        |  |            |      |                                  |                                                                                                       |                                 |                           |        |             |    |     |                                        |                              |                                                                      |         |      |        |                                                 |      |      |                    |  |
|---------------|--------|--|------------|------|----------------------------------|-------------------------------------------------------------------------------------------------------|---------------------------------|---------------------------|--------|-------------|----|-----|----------------------------------------|------------------------------|----------------------------------------------------------------------|---------|------|--------|-------------------------------------------------|------|------|--------------------|--|
| diabetes      | 356101 |  | Rasouli    | 2016 |                                  | Residents of Scania county in Sweden                                                                  | Sweden                          | Case-control              | Both   |             | 18 | 99  | Self-administered questionnaire        | Incidence                    | Physician diagnosis                                                  |         |      |        | Type 2 diabetes                                 | 1188 | 1472 | General population |  |
| cvd           | 322259 |  | Alzamora   | 2016 | ARTPER                           | Residents of 24 Primary Health Centers of the metropolitan Barcelona area and Barcelones Nord-Maresme | Spain                           | Prospective cohort        | Both   | 2.9         | 59 | 89  | Telephone and clinical history reviews | Incidence                    | ABI measurements                                                     |         | 95   | 2256   | Peripheral vascular disease                     |      |      |                    |  |
| cvd           | 457129 |  | Velescu    | 2016 | REGICOR                          | Residents in Girona and three neighboring rural villages                                              | Spain                           | Prospective cohort        | Both   | 5.7         | 35 | 79  | Administered MONICA questionnaire      | Incidence or Mortality       | Biomarker (ABI), clinical evaluation, medical records, vital records |         | 118  | 5434   | Peripheral vascular disease                     |      |      |                    |  |
| cvd           | 464806 |  | Piotrowski | 2016 | WOBASZ; WOBASZ Senior            | Polish residents                                                                                      | Poland                          | Pooled prospective cohort | Both   | 5, 8.2      | 20 |     |                                        | Mortality                    | Vital records                                                        |         | 568  | 15865  | Cardiovascular diseases                         |      |      |                    |  |
| cvd           | 464817 |  | Lachman    | 2016 | EPIC-Norfolk                     | Registries of general practices in Norfolk                                                            | United Kingdom                  | Prospective cohort        | Both   | 15          | 39 | 79  | Questionnaire                          | Hospitalization or Mortality | Hospital database, vital records                                     | 103961  | 1225 | 10043  | Cardiovascular diseases                         |      |      |                    |  |
| cvd           | 465192 |  | Cooney     | 2016 | SCORE                            | General population                                                                                    | Italy, Belgium, Denmark, Norway | Pooled prospective cohort | Both   | 6.0 to 10.1 | 65 | 101 | Varied                                 | Mortality                    | Varied                                                               | 2100000 | 4144 | 205000 | Ischemic heart disease; Cardiovascular diseases |      |      |                    |  |
| cvd           | 463531 |  | Martinez   | 2016 |                                  | Patients from Santa Ana Hospital, Granada, Spain                                                      | Spain                           | Case-control              | Both   | 47          | 94 |     | Interview                              | Incidence                    | Medical diagnosis                                                    |         |      |        | Ischemic heart disease; Stroke                  | 134  | 67   | Hospital           |  |
| breast_cancer | 448179 |  | Gram       | 2016 | Norwegian Women and Cancer Study | random sample of Norwegian women                                                                      | Norway                          | Prospective cohort        | Female | 13.4        | 34 | 70  | Self-administered questionnaire        | Incidence                    | Disease registry                                                     | 1747584 | 2813 | 130053 | Breast cancer( ICD-7: 170)                      |      |      |                    |  |
| fractures     | 414192 |  | Cauley     | 2016 | The Osteoporotic Fractures       | Men aged over 65 between                                                                              | United States                   | Prospective cohort        | Male   | 8.6         | 65 | 99  | Self-report, interview, or examination | Incidence                    | Self-report                                                          | 50,534  | 178  | 5876   | Hip fracture                                    |      |      |                    |  |



|                  |        |  |                |      |                                                                          |                                                                                         |                            |                    |        |      |    |     |                                 |                              |                                                                    |         |      |              |                                           |     |     |                                                    |  |
|------------------|--------|--|----------------|------|--------------------------------------------------------------------------|-----------------------------------------------------------------------------------------|----------------------------|--------------------|--------|------|----|-----|---------------------------------|------------------------------|--------------------------------------------------------------------|---------|------|--------------|-------------------------------------------|-----|-----|----------------------------------------------------|--|
|                  |        |  |                |      | study areas across China                                                 |                                                                                         |                            |                    |        |      |    |     |                                 |                              |                                                                    |         |      | E11 and E14) |                                           |     |     |                                                    |  |
| afib_and_flutter | 324155 |  | Zuo            | 2017 | Hordaland Health Study                                                   | Residents of Bergen or neighbouring suburban areas                                      | Norway                     | Prospective cohort | Both   | 11   | 46 | 74  | Administered questionnaire      | Hospitalization or mortality | Disease registries                                                 |         | 538  | 6682         | Atrial fibrillation                       |     |     |                                                    |  |
| afib_and_flutter | 324168 |  | Kokubo         | 2017 | The Suita Study                                                          | Residents of Suita City                                                                 | Japan                      | Prospective cohort | Both   | 14   | 30 | 79  | Administered questionnaire      | Incidence                    | Biannual health examinations, self-reported, medical record review | 95180   | 311  | 6898         | Atrial fibrillation or atrial flutter     |     |     |                                                    |  |
| leukemia         | 343390 |  | Ugai           | 2017 | The Japan Public Health Center-based Prospective Study                   | Residents of 10 prefectural public health center areas                                  | Japan                      | Prospective cohort | Both   | 18.3 | 40 | 69  | Self-administered questionnaire | Incidence                    | Disease registry, vital records, medical records                   | 1782762 | 47   | 96992        | Leukemia                                  |     |     |                                                    |  |
| breast_cancer    | 359074 |  | Jones          | 2017 | Generations Study                                                        | General female population of Great Britain                                              | United Kingdom             | Prospective cohort | Female | 7.7  | 16 | 102 | Questionnaire                   | Incidence                    | Self-report, cancer registries                                     | 788361  | 1815 | 120927       | Invasive breast cancer                    |     |     |                                                    |  |
| breast_cancer    | 359076 |  | Van den Brandt | 2017 | Netherlands Cohort Study (NLCS)                                          | General postmenopausal population                                                       | Netherlands                | Case-cohort        | Female | 20.3 | 55 | 69  | Self-administered questionnaire | Incidence                    | Netherlands Cancer Registry and Dutch Pathology Registry           |         | 2526 | 4342         | Postmenopausal breast cancer              |     |     |                                                    |  |
| breast_cancer    | 359078 |  | White          | 2017 | National Institute of Environmental Health Sciences (NIEHS) Sister Study | Females without history of breast cancer who have a sister with diagnosed breast cancer | United States, Puerto Rico | Prospective cohort | Female | 6.4  | 35 | 74  | Telephone questionnaire         | Incidence                    | Self-report                                                        | 326242  | 1843 | 50733        | Breast cancer                             |     |     |                                                    |  |
| copd             | 356275 |  | Deng           | 2017 |                                                                          | COPD cases and healthy volunteers who underwent routine health                          | China                      | Case-control       | Both   |      | 18 | 99  | Interview                       | Incidence                    | Physician diagnosis, biomarker                                     |         |      |              | COPD, fulfilling GOLD diagnostic criteria | 120 | 481 | Healthy volunteers who underwent a routine checkup |  |



|                       |        |  |        |      |                                                                                                                                                                              |                            |                     |        |    |    |    |                                                |           |                                |  |  |  |  |                          |                                                  |      |                                                                          |
|-----------------------|--------|--|--------|------|------------------------------------------------------------------------------------------------------------------------------------------------------------------------------|----------------------------|---------------------|--------|----|----|----|------------------------------------------------|-----------|--------------------------------|--|--|--|--|--------------------------|--------------------------------------------------|------|--------------------------------------------------------------------------|
|                       |        |  |        |      | checkups at the same hospital                                                                                                                                                |                            |                     |        |    |    |    |                                                |           |                                |  |  |  |  |                          | at the same hospital where cases were identified |      |                                                                          |
| breast_cancer         | 359094 |  | Arthur | 2017 | Females who had a biopsy for benign breast disease within the Kaiser Permanente Northwest Region health care system covering southwest Washington state and Northwest Oregon | United States              | Nested case-control | Female |    | 21 | 85 | Medical records                                | Incidence | KPNW Tumor Registry            |  |  |  |  | Invasive breast cancer   | 526                                              | 526  | Females with a biopsy who were alive but had not developed breast cancer |
| nasopharyngeal_cancer | 373803 |  | Chang  | 2017 | Residents from the Zhaoqing area of Guangdong Province and the Wuzhou and Guiping/Pingnan areas of Guangxi Autonomous Region                                                 | China (Guangdong, Guangxi) | Case-control        | Male   |    | 20 | 74 | Personal interview, administered questionnaire | Incidence | Histologically confirmed cases |  |  |  |  | Nasopharyngeal carcinoma | 2530                                             | 2595 | General population                                                       |
| cvd                   | 463489 |  | Aigner | 2017 | Patients from 26 German centers                                                                                                                                              | Germany                    | Case-control        | Both   | 18 | 55 |    | Interview                                      | Incidence | Clinical diagnosis             |  |  |  |  | Stroke; Ischemic stroke  | 2125                                             | 8500 | Population                                                               |
| cvd                   | 463527 |  | Kumar  | 2017 | Patients recruited from the All India Institute of Medical                                                                                                                   | India                      | Case-control        | Both   | 27 | 77 |    |                                                | Incidence | Clinical diagnosis             |  |  |  |  | Ischemic stroke          | 250                                              | 250  | Hospital                                                                 |

|               |        |  |                 |      |                                                  |                                                                                                        |                   |                           |        |      |     |    |                                  |               |                                                                                               |        |     |       |                                     |      |       |                   |  |
|---------------|--------|--|-----------------|------|--------------------------------------------------|--------------------------------------------------------------------------------------------------------|-------------------|---------------------------|--------|------|-----|----|----------------------------------|---------------|-----------------------------------------------------------------------------------------------|--------|-----|-------|-------------------------------------|------|-------|-------------------|--|
|               |        |  |                 |      |                                                  | Sciences,<br>New Delhi                                                                                 |                   |                           |        |      |     |    |                                  |               |                                                                                               |        |     |       |                                     |      |       |                   |  |
| cvd           | 463529 |  | Lioutas         | 2017 |                                                  | Residents recruited from Framingham, Massachusetts                                                     | United States     | Nested case-control       | Both   | 50   | 100 |    |                                  | Incidence     | Clinical diagnosis                                                                            |        |     |       | Intracerebral hemorrhage            | 106  | 318   | Cohort population |  |
| breast_cancer | 502439 |  | Ellingjord-Dale | 2017 |                                                  | Norwegian women aged 50-69 who attended a mammographic                                                 | Norway            | Nested case-control       | Female |      | 50  | 69 |                                  | Breast cancer | Disease registry                                                                              |        |     |       | Invasive breast cancer (ICD10: C50) | 4402 | 24760 | Community         |  |
| lung_cancer   | 502482 |  | Lawania         | 2017 |                                                  | newly diagnosed lung cancer patients from 15 hospitals around Germany                                  | Chandigarh, India | case-control              | Both   |      | 26  | 90 | self-administered questionnaire  | Incidence     | Hospital records                                                                              |        |     |       | lung cancer (ICD C33-C34)           | 811  | 912   | Population        |  |
| lung_cancer   | 358597 |  | Tindle          | 2018 | Framingham Heart Study                           | Adult residents of Framingham, Massachusetts                                                           | United States     | Prospective cohort        | Both   | 28.7 | 18  | 99 | Incidence                        | Incidence     | Disease surveillance through medical record review, pathology reports, and laboratory reports | 384506 | 543 | 8907  | Lung cancer                         |      |       |                   |  |
| copd          | 356273 |  | Leem            | 2018 | Ansung-Ansan Cohort Study                        | Adult Koreans covering the urban and rural populations (population-based sample from Ansan and Ansung) | South Korea       | Prospective cohort        | Both   | 3.5  | 40  | 69 | Survey                           | Incidence     | Biomarker                                                                                     | 22724  | 329 | 6517  | COPD                                |      |       |                   |  |
| stroke        | 336319 |  | Jamrozik        | 2018 | Australian Longitudinal Study on Women's Health; | Adults in specific birth cohorts                                                                       | Australia         | Pooled prospective cohort | Both   |      | 65  | 84 | Postal or face-to-face interview | Mortality     | Vital records                                                                                 |        | 502 | 23861 | Stroke (ICD 160-169, G45-G46)       |      |       |                   |  |



|     |        |  |          |      |                                                                    |                                                                                                |                |                           |        |     |    |    |                              |                        |                                                                      |        |      |                                          |                                                                           |     |     |            |  |
|-----|--------|--|----------|------|--------------------------------------------------------------------|------------------------------------------------------------------------------------------------|----------------|---------------------------|--------|-----|----|----|------------------------------|------------------------|----------------------------------------------------------------------|--------|------|------------------------------------------|---------------------------------------------------------------------------|-----|-----|------------|--|
|     |        |  |          |      | selected districts/counties                                        |                                                                                                |                |                           |        |     |    |    |                              | residential follow-up  |                                                                      |        |      | diseases; Ischemic heart disease; Stroke |                                                                           |     |     |            |  |
| cvd | 463016 |  | Honda    | 2018 | The Hisayama Study                                                 | Residents of Hisayama                                                                          | Japan          | Prospective cohort        | Both   | 24  | 40 | 84 | Standardized questionnaire   | Incidence or Mortality | Regular monitoring, autopsy reports, clinical history, clinical data |        | 1029 | 2462                                     | Cardiovascular diseases; Ischemic heart disease; Stroke                   |     |     |            |  |
| cvd | 463196 |  | Calling  | 2018 | Women's Health in the Lund Area Study                              | Women in Southern Sweden                                                                       | Sweden         | Prospective cohort        | Female | 17  | 50 | 64 | Questionnaire                | Hospitalization        | Hospital discharge records                                           |        | 205  | 6711                                     | Ischemic heart disease                                                    |     |     |            |  |
| cvd | 463202 |  | Kim      | 2018 | National Health Insurance Service National Health Screening Cohort | Citizens that underwent mandatory national health checkups under the national insurance scheme | South Korea    | Prospective cohort        | Male   | 7   | 40 |    | Self-reported questionnaire  | Hospitalization        | Hospital admissions records                                          | 836962 | 5333 | 108242                                   | Ischemic heart disease; Stroke; Ischemic stroke; Intracerebral hemorrhage |     |     |            |  |
| cvd | 463336 |  | Virtanen | 2018 | Whitehall II                                                       | Civil servants in 20 London-based departments                                                  | United Kingdom | Prospective cohort        | Both   | 11  | 35 | 55 | Baseline survey              | Incidence              | Disease registry, vital records, clinical data, hospital records     | 107907 | 799  | 8335                                     | Ischemic heart disease                                                    |     |     |            |  |
| cvd | 463461 |  | Veronesi | 2018 | MONICA-Brianza; PAMELA; SEMM                                       | Civil servants, residents of the Brianza area                                                  | Italy          | Pooled prospective cohort | Male   | 15  | 25 | 64 | Self-reported questionnaires | Incidence or Mortality | Hospital discharge, clinical data                                    |        | 162  | 2532                                     | Cardiovascular diseases                                                   |     |     |            |  |
| cvd | 464601 |  | Crowson  | 2018 |                                                                    | Patients with rheumatoid arthritis                                                             | Multi-location | Prospective cohort        | Both   | 5.8 |    |    | Baseline questionnaire       | Incidence or Mortality | Medical record review, study visits                                  |        | 389  | 5638                                     | Cardiovascular diseases                                                   |     |     |            |  |
| cvd | 358466 |  | Markidan | 2018 |                                                                    | Adult males                                                                                    | United States  | Case-control              | Male   | 15  | 49 |    | Standardized interviews      | Incidence              |                                                                      |        |      |                                          | First ischemic stroke                                                     | 615 | 530 | Population |  |

|          |        |  |                |      |                            |                                                                                                     |                      |                     |        |      |    |    |                                 |                        |                                         |         |       |        |                         |      |       |                   |  |
|----------|--------|--|----------------|------|----------------------------|-----------------------------------------------------------------------------------------------------|----------------------|---------------------|--------|------|----|----|---------------------------------|------------------------|-----------------------------------------|---------|-------|--------|-------------------------|------|-------|-------------------|--|
| cvd      | 462833 |  | Kivioja        | 2018 |                            | Patients from Helsinki University Hospital                                                          | Finland              | Case-control        | Both   | 25   | 49 |    | Administered questionnaire      | Incidence              | Discharge records                       |         |       |        | Ischemic stroke         | 961  | 1403  | Population        |  |
| cvd      | 463194 |  | Ivert          | 2018 |                            | Residents from Stockholm, Sweden                                                                    | Sweden               | Nested case-control | Both   | 18   | 49 |    | Cohort registers                | Incidence              | Disease registry, vital records         |         |       |        | Cardiovascular diseases | 2925 | 14660 | Cohort population |  |
| cvd      | 463298 |  | Lu             | 2018 |                            | Patients residing in Shandong Province and admitted to Binzhou Medical University                   | China                | Case-control        | Both   | 36   | 88 |    |                                 | Incidence              | Clinical diagnosis                      |         |       |        | Ischemic stroke         | 152  | 168   | Population        |  |
| cvd      | 463473 |  | Nordendah<br>l | 2018 |                            | Patients recruited from 17 Swedish hospitals                                                        | Sweden               | Case-control        | Both   | 18   | 75 |    | Structured questionnaires       | Incidence              | Medical records                         |         |       |        | Ischemic heart disease  | 785  | 792   | Population        |  |
| cvd      | 463479 |  | Zyriax         | 2018 |                            | Pre- and post-menopausal women admitted to the University Hospital Hamburg-Eppendorf                | Germany              | Case-control        | Female | 30   | 80 |    | Self-administered questionnaire | Incidence              | Clinical diagnosis                      |         |       |        | Ischemic heart disease  | 200  | 225   | Population        |  |
| diabetes | 502177 |  | White          | 2018 | Jackson Heart Study        | Black folks aged 21 to 84 years who were recruited from the tri-county area surrounding Jackson, MS | Jackson, Mississippi | Prospective cohort  | Both   | 8    | 21 | 84 | Self-administered questionnaire | Incidence              | Physician diagnosis                     | 23928   | 479   | 2991   | Diabetes mellitus       |      |       |                   |  |
| cvd      | 462792 |  | Banks          | 2019 | 45 and Up                  | General population of New South Wales                                                               | Australia            | Prospective cohort  | Both   | 7.4  | 45 | 99 | Postal questionnaire            | Incidence or Mortality | Hospital admissions data, vital records | 1350000 | 11778 | 188167 | Ischemic heart disease  |      |       |                   |  |
| cvd      | 462795 |  | Barengo        | 2019 | The National FINRISK Study | Adult population in five study areas                                                                | Finland              | Prospective cohort  | Both   | 11.8 | 45 | 74 | Self-administered questionnaire | Incidence or Mortality | Vital records, hospital                 |         |       | 13030  | Cardiovascular diseases |      |       |                   |  |





|                           |        |  |       |      |                                                      |                                                                                |                                                       |                    |        |      |    |    |                                              |                        |                                                      |         |      |                           |                              |      |      |                                                          |  |
|---------------------------|--------|--|-------|------|------------------------------------------------------|--------------------------------------------------------------------------------|-------------------------------------------------------|--------------------|--------|------|----|----|----------------------------------------------|------------------------|------------------------------------------------------|---------|------|---------------------------|------------------------------|------|------|----------------------------------------------------------|--|
|                           |        |  |       |      | communities                                          |                                                                                |                                                       |                    |        |      |    |    |                                              |                        |                                                      |         |      | hemorrhagic stroke cases) |                              |      |      |                                                          |  |
| Iri                       | 413804 |  | Hamer | 2019 | Health Survey for England and Scottish Health Survey | Households representative for the populations of the countries                 | United Kingdom, Scotland                              | Prospective cohort | Both   | 9.4  | 18 | 99 | Interview                                    | Mortality              | Death registry                                       | 919,949 | 579  | 97,844                    | Lower respiratory infections |      |      |                                                          |  |
| peripheral_artery_disease | 462792 |  | Banks | 2019 | The Sax Institute's 45 and Up Study                  | General population of New South Wales, Australia                               | Australia                                             | Cohort             | Both   | 10   | 45 | 99 | incident peripheral artery disease           | Incidence              | Self-report                                          | 1350000 | 2311 | 267153                    | Peripheral arterial disease  |      |      |                                                          |  |
| peripheral_artery_disease | 501896 |  | Ding  | 2019 | Atherosclerosis Risk in Communities (ARIC)           | US communities                                                                 | United States                                         | Cohort             | Both   | 26   | 45 | 64 | hospitalization with corresponding ICD codes | Incidence              | Administrative medical records or disease registries | 42319   | 199  | 7117                      | Peripheral arterial disease  |      |      |                                                          |  |
| parkinson                 | 502009 |  | Gallo | 2019 | NeuroEPIC 4PD study                                  | General population residing in defined geographical areas                      | Sweden, United Kingdom, Germany, Spain, Italy, Greece | Prospective cohort | Both   | 12.8 | 37 | 70 | Interview                                    | Incidence or Mortality | Administrative records, physician diagnosis          | 2666206 | 715  | 213818                    | Parkinson's disease          |      |      |                                                          |  |
| esophageal_cancer         | 439528 |  | Jin   | 2019 |                                                      | Newly registered primary cases of esophageal cancer in local cancer registries | Jiangsu, China                                        | Case-control       | Both   |      | 18 |    | Structured interview                         | Incidence              | Cancer registry                                      |         |      |                           | Esophageal cancer            | 2969 | 8019 | From a demographic database for four counties in Jiangsu |  |
| leukemia                  | 502184 |  | Viner | 2019 | Alberta's Tomorrow Project                           | Residents contacted through random digit dialing in Alberta                    | Alberta, Canada                                       | Prospective cohort | Both   | 12.3 | 35 | 69 | Health and Lifestyle Questionnaire           | Incidence              | Cancer registry                                      | 314966  | 98   | 25607                     | Leukemia                     |      |      |                                                          |  |
| breast_cancer             | 502184 |  | Viner | 2019 | Alberta's Tomorrow Project                           | women aged 35-69 years from Alberta                                            | Alberta, Canada                                       | Prospective cohort | Female | 12.3 | 35 | 69 | Self-administered questionnaire              | Incidence              | Disease registry                                     | 203946  | 465  | 16581                     | Breast cancer (ICD-3)        |      |      |                                                          |  |
| colon_and_rectum_cancer   | 502184 |  | Viner | 2019 | Alberta's Tomorrow Project                           | Residents contacted through random digit                                       | Alberta, Canada                                       | Prospective cohort | Both   | 12.3 | 35 | 69 | Health and Lifestyle Questionnaire           | Incidence              | Cancer registry                                      | 314966  | 88   | 25607                     | Colon cancer                 |      |      |                                                          |  |



|                         |        |  |           |      |  |                                                    |       |              |      |  |     |     |                                            |           |                                |  |  |  |  |                      |     |      |                                                                                                                                                                  |
|-------------------------|--------|--|-----------|------|--|----------------------------------------------------|-------|--------------|------|--|-----|-----|--------------------------------------------|-----------|--------------------------------|--|--|--|--|----------------------|-----|------|------------------------------------------------------------------------------------------------------------------------------------------------------------------|
|                         |        |  |           |      |  | dialing in Alberta                                 |       |              |      |  |     |     |                                            |           |                                |  |  |  |  |                      |     |      |                                                                                                                                                                  |
| colon_and_rectum_cancer | 502236 |  | Lee       | 2019 |  | Patients in the National Cancer Center             | Korea | Case-control | Both |  | <50 | 60+ | Structured interview                       | Incidence | Physician diagnosis, biomarker |  |  |  |  | Colon cancer         | 925 | 2775 | Patients that visited the hospital for a health-screening program provided by the National Health Insurance Service                                              |
| other_pharynx_cancer    | 439813 |  | Yamashita | 2019 |  | Treated Japanese patients at a university hospital | Japan | Case-control | Male |  | 18  | 99  | Self-administered questionnaire, interview | Incidence | Hospital records               |  |  |  |  | Other pharynx cancer | 61  | 71   | Patients who were treated who were treated for inflammatory disease and benign tumors, such as chronic sinusitis, chronic tonsillitis, and benign salivary tumor |
| other_pharynx_cancer    | 439809 |  | Zeng      | 2019 |  |                                                    | China | Case-control | Both |  | 18  | 99  | Questionnaire                              | Incidence | Medical records                |  |  |  |  | Other pharynx cancer | 278 | 693  | Patients with diseases unrelated to alcohol, tobacco, or dietary practices in two                                                                                |



|             |        |  |           |      |                     |                                                                                                                                   |                |                    |        |      |    |    |                                 |                       |                                                             |         |      |        |                                                                                                                      |     |     |            |
|-------------|--------|--|-----------|------|---------------------|-----------------------------------------------------------------------------------------------------------------------------------|----------------|--------------------|--------|------|----|----|---------------------------------|-----------------------|-------------------------------------------------------------|---------|------|--------|----------------------------------------------------------------------------------------------------------------------|-----|-----|------------|
| lung_cancer | 502252 |  | Lai       | 2019 |                     | lung cancer patients registered with the Kerman Cancer Registry                                                                   | Taiwan, China  | case-control       | Both   |      | 30 | 80 | self-administered questionnaire | Incidence             | Histological confirmed cases                                |         |      |        | lung cancer                                                                                                          | 140 | 280 | Population |
| lung_cancer | 502208 |  | Jin       | 2019 |                     | historically confirmed lung cancer patients from Queen Mary Hospital                                                              | China          | case-control       | Female |      | 18 | 95 | self-administered questionnaire | Incidence             | CDC-managed local cancer registries                         |         |      |        | lung cancer                                                                                                          | 331 | 331 | Hospital   |
| ihd         | 501896 |  | Ding      | 2020 | ARIC Study          | participants aged 45–64 years from four U.S. communities                                                                          | United States  | Prospective cohort | Both   | 26   | 45 | 64 | Interview                       | Incidence & Mortality | Hospital admissions                                         | 276908  | 1798 | 13355  | CHD (definite or probable myocardial infarction or fatal CHD)                                                        |     |     |            |
| ihd         | 502134 |  | Wilsgaard | 2020 | The Tromso Study    | participants from the municipality of Tromso, Norway                                                                              | Norway         | Prospective cohort | Both   | 19   | 25 | 69 | Self-administered questionnaire | Incidence             | Disease and death registries                                |         | 2139 | 14965  | Myocardial infarction                                                                                                |     |     |            |
| stroke      | 502250 |  | Oshunbade | 2020 | Jackson Heart Study | participants, aged 21 to 84 years, who were recruited from the tricity area surrounding Jackson, MS (Hinds, Rankin, and Madison). | Jackson, MI    | Prospective cohort | Both   | 11.8 | 21 | 84 | Self-administered questionnaire | Incidence             | Self-report, hospital admission records, death certificates | 52038   | 220  | 4410   | Stroke                                                                                                               |     |     |            |
| stroke      | 502248 |  | Peters    | 2020 | UK Biobank Study    | women and men 40 to 69 years of age at baseline who attended 1 of the 22 centers across the United Kingdom                        | United Kingdom | Prospective cohort | Both   | 9    | 40 | 69 | Self-administered questionnaire | Incidence             | Hospital admissions, death registries                       | 4247739 | 4662 | 471971 | Stroke (fatal or nonfatal ischemic stroke (I63 or I64), hemorrhagic stroke (I61), and all stroke as defined by codes |     |     |            |

|                       |        |  |                      |      |  |                                                                          |                    |                    |      |    |    |    |                                 |                                |                                   |         |      |                                  |                                                                                                  |      |      |                                                                 |  |
|-----------------------|--------|--|----------------------|------|--|--------------------------------------------------------------------------|--------------------|--------------------|------|----|----|----|---------------------------------|--------------------------------|-----------------------------------|---------|------|----------------------------------|--------------------------------------------------------------------------------------------------|------|------|-----------------------------------------------------------------|--|
|                       |        |  |                      |      |  |                                                                          |                    |                    |      |    |    |    |                                 |                                |                                   |         |      | I60, I61, I63, or I64 in ICD-10) |                                                                                                  |      |      |                                                                 |  |
| stroke                | 501860 |  | Rautalin             | 2020 |  | same-sex twin pairs of Finnish origin from the older Finnish Twin Cohort | Finland            | Prospective cohort | Both | 43 | 18 | 99 | Self-administered questionnaire | Mortality                      | Death registry                    | 869469  | 120  | 16282                            | Subarachnoid hemorrhage (ICD codes 430 (8th and 9th versions) and I60.0 to I60.9 (10th version)) |      |      |                                                                 |  |
| tb                    | 501936 |  | Tewatia              | 2020 |  | Hospital admitted patients                                               | Uttarakhand, India | Case-control       | Both |    | 18 | 95 | Self-report                     | Incidence                      | Hospital records                  |         |      |                                  | Tuberculosis                                                                                     | 92   | 184  | Hospital                                                        |  |
| nasopharyngeal_cancer | 502223 |  | Hsu                  | 2020 |  | Patients in six hospitals                                                | Taiwan             | Case-control       | Male |    | 18 | 69 | Structured interview            | Incidence                      | Physician diagnosis, Biomarker    |         |      |                                  | Nasopharynx cancer                                                                               | 1235 | 1262 | From Health Examination Centers or ENT wards/outpatient clinics |  |
| pancreatic_cancer     | 502188 |  | Esther Molina-Montes | 2020 |  | PanGenEU study                                                           | Western Europe     | case-control       | Both |    | 18 | 99 | self-report                     | incidence of pancreatic cancer | Physician diagnosis               |         |      |                                  | Pancreatic Cancer                                                                                | 2009 | 1532 | Population                                                      |  |
| rheumatoid_arthritis  | 502082 |  | Jinma Ren            | 2020 |  | CLUE I study                                                             | United States      | case-control       |      |    | 18 | 76 | self-report                     | incident RA                    | physician diagnosis               |         |      |                                  | Rheumatoid arthritis                                                                             | 54   | 216  | CLUE I cohort participants without RA                           |  |
| lung_cancer           | 502246 |  | Shimatani            | 2020 |  | Taiwan"                                                                  | Aichi, Japan       | case-control       | Both |    | 35 | 81 | administered questionnaire      | Incidence                      | Histological confirmed cases      |         |      |                                  | Lung cancer                                                                                      | 132  | 132  | Hospital                                                        |  |
| lung_cancer           | 502143 |  | Hawrysz              | 2020 |  | JFC study                                                                | Poland             | case-control       | Male |    | 45 | 80 | self-administered questionnaire | Incidence                      | X-ray and CT confirmed            |         |      |                                  | lung cancer                                                                                      | 68   | 1808 | Population                                                      |  |
| copd                  | 502095 |  | Zhang                | 2021 |  | community-based participants aged 40–69 years from                       | United Kingdom     | Prospective cohort | Both | 8  | 40 | 69 | Self-administered questionnaire | Incidence                      | Medical records or death registry | 6449172 | 7956 | 411569                           | COPD (ICD 9th Revision codes 492, 492.0,                                                         |      |      |                                                                 |  |

|        |        |  |         |      |                                                                         |                                                     |                          |      |      |    |    |                                 |                        |                     |         |       |                      |                                                                                                                                  |     |     |           |  |
|--------|--------|--|---------|------|-------------------------------------------------------------------------|-----------------------------------------------------|--------------------------|------|------|----|----|---------------------------------|------------------------|---------------------|---------|-------|----------------------|----------------------------------------------------------------------------------------------------------------------------------|-----|-----|-----------|--|
|        |        |  |         |      | across the UK                                                           |                                                     |                          |      |      |    |    |                                 |                        |                     |         |       | 492.8, 496.X or 10th |                                                                                                                                  |     |     |           |  |
| copd   | 502107 |  | Thomson | 2021 | men and women aged 35 years or older, from two districts of Mexico City | Mexico                                              | Prospective cohort       | Both | 20   | 35 | 89 | Interview                       | Mortality              | Death registry      |         | 375   | 129151               | COPD (ICD-10)                                                                                                                    |     |     |           |  |
| copd   | 502093 |  | Ganbold | 2021 | Patients who had been referred to the First, Second, and Third          | Ulaanbaatar, Mongolia                               | Case-control             | Both |      | 18 | 99 | Self-administered questionnaire | Incidence              | Physician diagnosis |         |       |                      | COPD (defined as an FEV1 <70% of                                                                                                 | 181 | 292 | Community |  |
| stroke | 501942 |  | Sato    | 2021 | Jichi Medical School Cohort Study                                       | Japan                                               | Prospective cohort       | Both | 10.7 | 18 | 69 | Interview                       | Incidence              | Medical records     | 121166  | 417   | 11324                | Stroke (including intracerebral hemorrhages, cerebral infarctions and subarachnoid hemorrhages)                                  |     |     |           |  |
| stroke | 501943 |  | Zhang   | 2021 | UK Biobank Study                                                        | United Kingdom                                      | Prospective cohort       | Both | 11.4 | 50 | 74 | Self-administered questionnaire | Incidence              | Medical records     | 4168774 | 10053 | 365682               | Stroke (ICD-10: stroke (I60,I61,I62.9,I63,I64,I67.8,I69.0,and I69.3), ischemic stroke (I63), hemorrhagic stroke (I60 and I62.9)) |     |     |           |  |
| tb     | 501926 |  | Li      | 2021 | Singapore Chinese Health Study                                          | Chinese adults from 2 major dialect groups (Hokkien | Prospective cohort study | Both | 18.2 | 45 | 74 | Cigarettes/day                  | Incidence or Mortality | Disease registry    | 18.2    | 1358  | 60245                | Tuberculosis                                                                                                                     |     |     |           |  |



|                         |        |  |              |      |                               |                                                                                                          |              |                    |        |     |    |    |                                   |           |                                    |         |      |        |                            |     |     |                                                          |  |
|-------------------------|--------|--|--------------|------|-------------------------------|----------------------------------------------------------------------------------------------------------|--------------|--------------------|--------|-----|----|----|-----------------------------------|-----------|------------------------------------|---------|------|--------|----------------------------|-----|-----|----------------------------------------------------------|--|
| laryngeal_cancer        | 502130 |  | Mezzoiuso    | 2021 | FRiCaM Multisite Cohort Study | Residents in the municipality of Milan                                                                   | Milan, Italy | Prospective cohort | Female | 15  | 41 | 76 | Self-report through questionnaire | Incidence | Cancer registry                    | 1120900 | 29   | 75324  | Laryngeal cancer           |     |     |                                                          |  |
| breast_cancer           | 502130 |  | Mezzoiuso    | 2021 | FRiCaM Multisite Cohort Study | women aged 41-76 years who resided in the municipality of Milan                                          | Italy        | Prospective cohort | Female | 15  | 41 | 76 | Self-administered questionnaire   | Incidence | Disease registry                   | 1129860 | 2952 | 75324  | Breast cancer (ICD10: C50) |     |     |                                                          |  |
| cervical_cancer         | 502130 |  | Mezzoiuso    | 2021 | FRiCaM Multisite Cohort Study | Residents in the municipality of Milan                                                                   | Milan, Italy | Prospective cohort | Female | 15  | 41 | 76 | Self-administered questionnaire   | Incidence | Cancer registry                    | 1120900 | 62   | 75324  | Cervical cancer            |     |     |                                                          |  |
| colon_and_rectum_cancer | 502484 |  | Roh          | 2021 |                               | Patients who participated in the voluntary health screening program of the National Cancer Center, Korea | Korea        | Prospective cohort | Both   | NA  | 19 | 78 | Self-administered questionnaire   | Incidence | Cancer registry                    | NA      | NA   | 8121   | Colon cancer               |     |     |                                                          |  |
| colon_and_rectum_cancer | 502130 |  | Mezzoiuso    | 2021 | FRiCaM Multisite Cohort Study | Residents in the municipality of Milan                                                                   | Milan, Italy | Prospective cohort | Female | 15  | 41 | 76 | Self-report through questionnaire | Incidence | Cancer registry                    | 1120900 | 197  | 75324  | Colon cancer               |     |     |                                                          |  |
| colon_and_rectum_cancer | 502135 |  | Chen         | 2021 |                               | Participants in the MJ Health Management Institution for selfpaying medical screening in Taiwan          | Taiwan       | Prospective cohort | Both   | 7.4 | 40 | 99 | Self-report through questionnaire | Incidence | Cancer registry and death registry | 1731925 | 1972 | 234044 | Colon cancer               |     |     |                                                          |  |
| colon_and_rectum_cancer | 502196 |  | Chottanapund | 2021 |                               | Patients in 11 Thai provincial hospitals                                                                 | Thailand     | Case-control       | Both   |     | 35 | 99 | Standardized questionnaire        | Incidence | Hospital records                   |         |      |        | Colon cancer               | 504 | 997 | Patients that visited the hospitals for health check ups |  |

|                        |        |  |                          |      |                                                    |                                                                        |                     |                    |        |      |    |                                  |                                 |                                                      |                                                            |         |                      |                            |                |                                                                                                     |  |
|------------------------|--------|--|--------------------------|------|----------------------------------------------------|------------------------------------------------------------------------|---------------------|--------------------|--------|------|----|----------------------------------|---------------------------------|------------------------------------------------------|------------------------------------------------------------|---------|----------------------|----------------------------|----------------|-----------------------------------------------------------------------------------------------------|--|
| other_pharynx_cancer   | 502194 |  | Shewale                  | 2021 |                                                    | Patients in the outpatient otolaryngology at The Ohio State University | Ohio, United States | Case-control       | Both   | 18   | 99 | Computer-assisted self-interview | Incidence                       | Hospital records                                     |                                                            |         | Other pharynx cancer | 249                        | 478            | Patients without history of cancer seen for benign conditions                                       |  |
| lip_oral_cavity_cancer | 502130 |  | Angelo Giosuè Mezzoiuso  | 2021 | FRiCAM (Risk Factors for Breast Cancer)            | participants in the FRiCAM study living in Milano, Italy               | Italy               | Prospective cohort | Female | 15   | 14 | 76                               | self-report                     | Incident diagnosis of oral cancer                    | Physician diagnosis                                        | 112     | 75,324               | Lip and Oral Cavity Cancer |                |                                                                                                     |  |
| pancreatic_cancer      | 502130 |  | Angelo Giosuè Mezzoiuso  | 2021 | FRiCAM (Risk Factors for Breast Cancer)            | participants in the FRiCAM study living in Milano, Italy               | Italy               | Prospective cohort | Female | 15   | 14 | 76                               | self-report                     | Incident diagnosis of pancreatic cancer              | Physician diagnosis                                        | 309     | 75,324               | Pancreatic Cancer          |                |                                                                                                     |  |
| pancreatic_cancer      | 502128 |  | Ahmad Naghibzadeh-Tahami | 2021 |                                                    | adults living in Kerman Province                                       | Kerman, Iran        | case-control       | Both   | 18   | 99 | self-report                      | incidence of pancreatic cancer  | Administrative medical records or disease registries |                                                            |         | Pancreatic Cancer    | 176                        | 352            | Population                                                                                          |  |
| bladder_cancer         | 502130 |  | Mezzoiuso                | 2021 | FRiCaM Multisite Cohort Study                      | Residents in the municipality of Milan                                 | Milan, Italy        | Prospective cohort | Female | 15   | 41 | 76                               | Self-administered questionnaire | Incidence                                            | Cancer registry                                            | 1120900 | 170                  | 75324                      | Bladder cancer |                                                                                                     |  |
| bladder_cancer         | 502089 |  | Abdolahinia              | 2021 |                                                    | Patients in a teaching hospital                                        | Kerman, Iran        | Case-control       | Both   | 40   | 93 | Structured questionnaire         | Incidence                       | Hospital records                                     |                                                            |         | Bladder cancer       | 100                        | 200            | Patients from other hospitals who had undergone cystoscopy due to diseases unrelated to the bladder |  |
| kidney_cancer          | 502132 |  | Minami                   | 2021 | Japan Public Health Center-based Prospective Study | Japanese residents from 11 public health centers                       | Japan               | Prospective cohort | Both   | 19.1 | 40 | 69                               | Self-administered questionnaire | Incidence                                            | Hospital notification, cancer registry, and death registry | 2020364 | 340                  | 106003                     | Kidney cancer  |                                                                                                     |  |





|             |        |  |           |      |                                                |                                                                                              |                |                    |        |     |    |    |                           |           |                                  |           |      |                                                                                                                                                                                                                                          |             |  |  |  |  |
|-------------|--------|--|-----------|------|------------------------------------------------|----------------------------------------------------------------------------------------------|----------------|--------------------|--------|-----|----|----|---------------------------|-----------|----------------------------------|-----------|------|------------------------------------------------------------------------------------------------------------------------------------------------------------------------------------------------------------------------------------------|-------------|--|--|--|--|
|             |        |  |           |      |                                                |                                                                                              |                |                    |        |     |    |    |                           |           |                                  |           |      | Myeloid ,<br>Leukaemia<br>, Kidney,<br>Colorectum,<br>Stomach,<br>Gallbladder<br>and<br>extrahepatic<br>bile<br>ducts,<br>Head and<br>Neck,<br>Pancreas ,<br>Bladder,<br>Unknown<br>primary<br>site ,<br>Oesophagus,<br>Liver,<br>Larynx |             |  |  |  |  |
| lung_cancer | 502130 |  | Mezzoiuso | 2021 | FRiCAM multicenter cohort study                | all women 41-76 residing in Milan from 2003 to 2006 who had a mammogram                      | Italy          | Prospective Cohort | Female | 15  | 41 | 76 | Self-Report Questionnaire | Incidence | Self-report diagnosis            |           | 9487 | 75324                                                                                                                                                                                                                                    | Lung cancer |  |  |  |  |
| lung_cancer | 502190 |  | Park      | 2021 | Korean National Cancer Center Community Cohort | adults more than 20 years old diagnosed with any type of cancer                              | South Korea    | Prospective Cohort | Both   | 23  | 20 | 90 | Self-Report Questionnaire | Mortality | Clinical Records                 | 939852.65 | 173  | 8542                                                                                                                                                                                                                                     | Lung cancer |  |  |  |  |
| lung_cancer | 502192 |  | Jia       | 2021 | UK Biobank                                     | participants in the UK biobank study, adults from England, Scotland, and Wales between 40-69 | United Kingdom | Prospective Cohort | Both   | 5.8 | 40 | 69 | Self-Report Questionnaire | Incidence | linkage with hospital records    |           | 1779 | 308490                                                                                                                                                                                                                                   | Lung cancer |  |  |  |  |
| lung_cancer | 502147 |  | Huang     | 2021 |                                                | 2015) of China"                                                                              | Taiwan, China  | case-control       | Both   |     | 20 | 80 | administered interview    | Incidence | Hospital records, diagnosed with |           |      |                                                                                                                                                                                                                                          | Lung cancer |  |  |  |  |



|                 |        |  |                    |      |                                         |                                                                                                                          |                  |                    |      |     |    |    |                                 |           |                            |           |      |         |                              |     |     |            |  |
|-----------------|--------|--|--------------------|------|-----------------------------------------|--------------------------------------------------------------------------------------------------------------------------|------------------|--------------------|------|-----|----|----|---------------------------------|-----------|----------------------------|-----------|------|---------|------------------------------|-----|-----|------------|--|
| cataracts       | 501887 |  | Soheil Mehmandoust | 2022 |                                         | newly diagnosed patients with cataracts eligible for surgery within the next 3 months from Shafa hospital in Kerman City | Iran             | case-control       | Both |     | 50 | 64 | self-report                     | Incidence | Physician diagnosis        |           |      |         | cataracts                    | 160 | 320 | Hospital   |  |
| lung_cancer     | 502075 |  | Zhang              | 2022 | UK Biobank                              | participants in the UK biobank study, adults from England, Scotland, and Wales between 40-69                             | United Kingdom   | Prospective Cohort | Both | 7.2 | 40 | 69 | Self-Report Questionnaire       | Incidence | Self-report diagnosis      | 2,454,915 | 1687 | 344107  | Lung cancer                  |     |     |            |  |
| lung_cancer     | 502126 |  | Guo                | 2022 | Cancer Screening Program in Urban China | "40–74 years old residents (40–69 years old between 2012 and                                                             | China            | Prospective Cohort | Both | 8   | 40 | 79 | Self-Report Questionnaire       | Incidence | Clinical Records           | 6,491,000 | 589  | 282,254 | Lung cancer                  |     |     |            |  |
| lung_cancer     | 502215 |  | Huang              | 2022 |                                         | adults with lung cancer in Tehran, Iran without suspected pulmonay metastases from a different primary tumor             | Taiwan, China    | case-control       | Both |     | 29 | 93 | administered interview          | Incidence | Pathologic confirmation    |           |      |         | Lung cancer                  | 190 | 380 | Hospital   |  |
| lung_cancer     | 502213 |  | Tse                | 2022 |                                         | WELCA study                                                                                                              | Hong Kong, China | case-control       | Male |     | 35 | 79 | self-administed questionnaire   | Incidence | Histologic confirmed cases |           |      |         | lung cancer (ICD C33-C34)    | 716 | 757 | Population |  |
| aortic_aneurism | 343424 |  | Burns              |      | Cancer Prevention Study I               | Friends, neighbors and acquaintances of ACS volunteers                                                                   | United States    | Prospective cohort | Both | 6   | 50 | 99 | Self-administered questionnaire | Mortality | Vital records              |           |      | 786387  | Aortic aneurysm (ICD-7, 451) |     |     |            |  |



### Section 3: Study quality & bias assessment

For each study that met the inclusion criteria, one reviewer assessed the indicators of bias included in the extraction template (Table 2). These indicators of bias were quantified as binary covariates included in risk curve estimations upon determining significant indicators by cause (Table 7).

**Table 4: Study bias characteristics**

| NID    | Cause                          | Author     | Year | Study design        | Location                | cv_adj_L0 | cv_adj_L1 | cv_adj_L2 | cv_exposure_study | cv_older | cv_subpopulation |
|--------|--------------------------------|------------|------|---------------------|-------------------------|-----------|-----------|-----------|-------------------|----------|------------------|
| 328492 | Alzheimer's and other dementia | Ohara      | 2015 | Prospective cohort  | Japan                   | 0         | 0         | 0         | 1                 | 1        | 0                |
| 328517 | Alzheimer's and other dementia | Rusanen    | 2011 | Prospective cohort  | United States           | 1         | 1         | 1         | 1                 | 0        | 1                |
| 349159 | Alzheimer's and other dementia | Garcia     | 2010 | Case-control        | Spain                   | 0         | 0         | 0         | 1                 | 0        | 1                |
| 358834 | Alzheimer's and other dementia | Ikeda      | 2008 | Nested case-control | Japan                   | 0         | 0         | 0         | 1                 | 1        | 1                |
| 358836 | Alzheimer's and other dementia | Prince     | 1994 | Case-control        | United Kingdom          | 1         | 1         | 1         | 1                 | 1        | 1                |
| 358838 | Alzheimer's and other dementia | Shalat     | 1987 | Case-control        | United States           | 1         | 1         | 1         | 1                 | 0        | 1                |
| 501943 | Alzheimer's and other dementia | Zhang      | 2021 | Prospective cohort  | United Kingdom          | 0         | 0         | 0         | 1                 | 0        | 0                |
| 502162 | Alzheimer's and other dementia | Gong       | 2021 | Prospective cohort  | United Kingdom          | 1         | 0         | 0         | 1                 | 0        | 1                |
| 173863 | Aortic aneurism                | Doll       | 1994 | Prospective cohort  | United Kingdom          | 1         | 0         | 0         | 0                 | 0        | 1                |
| 236197 | Aortic aneurism                | Pirie      | 2013 | Prospective cohort  | United Kingdom          | 0         | 0         | 0         | 1                 | 0        | 0                |
| 328259 | Aortic aneurism                | Nilsson    | 2001 | Prospective cohort  | Sweden                  | 1         | 0         | 0         | 1                 | 0        | 0                |
| 331705 | Aortic aneurism                | Lawlor     | 2008 | Prospective cohort  | Republic of Korea       | 0         | 0         | 0         | 1                 | 0        | 1                |
| 343424 | Aortic aneurism                | Burns      | 1997 | Prospective cohort  | United States           | 1         | 1         | 1         | 1                 | 0        | 1                |
| 347380 | Aortic aneurism                | Carstensen | 1987 | Prospective cohort  | Sweden                  | 1         | 0         | 0         | 1                 | 0        | 0                |
| 350128 | Aortic aneurism                | Wilmink    | 1999 | Nested case-control | England, United Kingdom | 0         | 0         | 0         | 1                 | 0        | 1                |
| 350131 | Aortic aneurism                | Rogot      | 1980 | Prospective cohort  | United States           | 1         | 1         | 1         | 1                 | 0        | 1                |
| 358841 | Aortic aneurism                | Forsdahl   | 2009 | Prospective cohort  | Norway                  | 0         | 0         | 0         | 1                 | 0        | 0                |
| 358843 | Aortic aneurism                | Wong       | 2007 | Prospective cohort  | United States           | 0         | 0         | 0         | 1                 | 0        | 1                |
| 358845 | Aortic aneurism                | Iribarren  | 2007 | Prospective cohort  | United States           | 0         | 0         | 0         | 1                 | 0        | 1                |
| 358857 | Aortic aneurism                | Sode       | 2013 | Prospective cohort  | Denmark                 | 0         | 0         | 0         | 1                 | 0        | 1                |
| 111344 | Asthma                         | Strachan   | 1996 | Prospective cohort  | United Kingdom          | 1         | 1         | 1         | 1                 | 0        | 0                |
| 173863 | Asthma                         | Doll       | 1994 | Prospective cohort  | United Kingdom          | 1         | 0         | 0         | 0                 | 0        | 1                |
| 346726 | Asthma                         | Genuneit   | 2006 | Prospective cohort  | Germany                 | 1         | 0         | 0         | 1                 | 0        | 1                |
| 346728 | Asthma                         | Gilliland  | 2006 | Prospective cohort  | United States           | 1         | 0         | 0         | 1                 | 0        | 1                |
| 346730 | Asthma                         | Piipari    | 2004 | Case-control        | Finland                 | 1         | 0         | 0         | 1                 | 0        | 1                |
| 346737 | Asthma                         | Nakamura   | 2009 | Prospective cohort  | Japan                   | 0         | 0         | 0         | 1                 | 0        | 0                |

|        |                                 |                |      |                    |                                                |   |   |   |   |   |   |
|--------|---------------------------------|----------------|------|--------------------|------------------------------------------------|---|---|---|---|---|---|
| 346743 | Asthma                          | Troisi         | 1995 | Prospective cohort | United States                                  | 1 | 1 | 0 | 1 | 0 | 1 |
| 324155 | Atrial fibrillation and flutter | Zuo            | 2017 | Prospective cohort | Norway                                         | 0 | 0 | 0 | 1 | 0 | 0 |
| 324155 | Atrial fibrillation and flutter | Zuo            | 2017 | Prospective cohort | Norway                                         | 1 | 1 | 0 | 1 | 0 | 0 |
| 324168 | Atrial fibrillation and flutter | Kokubo         | 2017 | Prospective cohort | Japan                                          | 1 | 1 | 0 | 1 | 0 | 0 |
| 350084 | Atrial fibrillation and flutter | Heeringa       | 2008 | Prospective cohort | Netherlands                                    | 0 | 0 | 0 | 1 | 1 | 0 |
| 350084 | Atrial fibrillation and flutter | Heeringa       | 2008 | Prospective cohort | Netherlands                                    | 1 | 1 | 0 | 1 | 1 | 0 |
| 350091 | Atrial fibrillation and flutter | Maattili       | 2008 | Case-control       | Italy                                          | 1 | 0 | 0 | 1 | 0 | 0 |
| 357504 | Atrial fibrillation and flutter | Rosengren      | 2009 | Prospective cohort | Sweden                                         | 1 | 1 | 0 | 1 | 0 | 0 |
| 343155 | Bladder cancer                  | Chiu           | 2001 | Case-control       | United States                                  | 0 | 0 | 0 | 1 | 0 | 1 |
| 343198 | Bladder cancer                  | Cao            | 2005 | Case-control       | China                                          | 1 | 0 | 0 | 1 | 0 | 1 |
| 343580 | Bladder cancer                  | Siemiatycki    | 1995 | Case-control       | Canada                                         | 1 | 1 | 1 | 1 | 0 | 0 |
| 344435 | Bladder cancer                  | Burch          | 1989 | Case-control       | Canada                                         | 1 | 0 | 0 | 1 | 0 | 0 |
| 502089 | Bladder cancer                  | Abdolahinia    | 2021 | Case-control       | Iran                                           | 1 | 0 | 0 | 1 | 0 | 1 |
| 502130 | Bladder cancer                  | Mezzoiuso      | 2021 | Prospective cohort | Italy                                          | 1 | 0 | 0 | 1 | 0 | 0 |
| 502393 | Bladder cancer                  | Yu             | 1997 | Case-control       | China                                          | 0 | 0 | 0 | 1 | 0 | 1 |
| 502401 | Bladder cancer                  | Wakai          | 2000 | Case-control       | Japan                                          | 1 | 0 | 0 | 1 | 0 | 1 |
| 502403 | Bladder cancer                  | Geoffroy-Perez | 2001 | Case-control       | France                                         | 1 | 0 | 0 | 1 | 0 | 1 |
| 502413 | Bladder cancer                  | Fortuny        | 1999 | Case-control       | Denmark, France, Germany, Greece, Italy, Spain | 1 | 0 | 0 | 1 | 1 | 0 |
| 502415 | Bladder cancer                  | Liang          | 2008 | Case-control       | United States                                  | 1 | 1 | 0 | 1 | 0 | 1 |
| 502417 | Bladder cancer                  | Sun            | 2004 | Prospective cohort | China                                          | 1 | 1 | 1 | 1 | 0 | 1 |
| 502423 | Bladder cancer                  | Hung           | 2004 | Case-control       | Italy                                          | 1 | 1 | 0 | 1 | 0 | 1 |
| 502425 | Bladder cancer                  | Gaertner       | 2004 | Case-control       | Canada                                         | 0 | 0 | 0 | 1 | 0 | 1 |
| 502429 | Bladder cancer                  | Taylor         | 1998 | Case-control       | United States                                  | 1 | 1 | 0 | 1 | 0 | 1 |
| 502431 | Bladder cancer                  | Band           | 2005 | Case-control       | Canada                                         | 1 | 1 | 1 | 1 | 0 | 1 |
| 502435 | Bladder cancer                  | Covolo         | 2008 | Case-control       | Italy                                          | 1 | 1 | 1 | 1 | 0 | 1 |
| 502437 | Bladder cancer                  | Zheng          | 2011 | Case-control       | Egypt                                          | 1 | 1 | 1 | 1 | 0 | 1 |
| 502444 | Bladder cancer                  | Quirk          | 2004 | Case-control       | China                                          | 1 | 1 | 1 | 1 | 0 | 1 |

|        |                |             |      |                    |                                                                                             |   |   |   |   |   |   |
|--------|----------------|-------------|------|--------------------|---------------------------------------------------------------------------------------------|---|---|---|---|---|---|
| 502446 | Bladder cancer | Stern       | 2009 | Case-control       | China, United States                                                                        | 1 | 1 | 0 | 1 | 0 | 1 |
| 502446 | Bladder cancer | Stern       | 2009 | Case-control       | China, United States                                                                        | 1 | 1 | 1 | 1 | 0 | 0 |
| 502450 | Bladder cancer | Baris       | 2009 | Case-control       | United States                                                                               | 1 | 0 | 0 | 1 | 0 | 1 |
| 502450 | Bladder cancer | Baris       | 2009 | Case-control       | United States                                                                               | 1 | 1 | 0 | 1 | 0 | 1 |
| 502452 | Bladder cancer | Burns       | 1991 | Case-control       | United States                                                                               | 1 | 1 | 0 | 1 | 0 | 1 |
| 502456 | Bladder cancer | Kurahashi   | 2009 | Prospective cohort | Japan                                                                                       | 1 | 1 | 1 | 1 | 0 | 0 |
| 502458 | Bladder cancer | Siemiatycki | 1994 | Case-control       | Canada                                                                                      | 1 | 1 | 1 | 1 | 0 | 0 |
| 502462 | Bladder cancer | Chyou       | 1993 | Prospective cohort | United States                                                                               | 1 | 1 | 1 | 1 | 0 | 1 |
| 502464 | Bladder cancer | Samanic     | 2006 | Case-control       | Spain                                                                                       | 1 | 1 | 1 | 1 | 0 | 0 |
| 502466 | Bladder cancer | Meliker     | 2010 | Case-control       | United States                                                                               | 1 | 1 | 1 | 1 | 1 | 0 |
| 502468 | Bladder cancer | Harris      | 1990 | Case-control       | United States                                                                               | 1 | 0 | 0 | 1 | 1 | 1 |
| 502476 | Bladder cancer | Wallace     | 2009 | Case-control       | United States                                                                               | 1 | 1 | 0 | 1 | 0 | 1 |
| 502486 | Bladder cancer | Puente      | 2006 | Case-control       | Germany, Spain, Italy, United States, France, Greece, Denmark, Canada                       | 1 | 0 | 0 | 1 | 0 | 1 |
| 309776 | Breast cancer  | Morabia     | 1996 | Case-control       | Switzerland                                                                                 | 0 | 0 | 0 | 1 | 0 | 1 |
| 310321 | Breast cancer  | Dossus      | 2014 | Prospective cohort | Denmark, France, Germany, Greece, Italy, Netherlands, Norway, Spain, Sweden, United Kingdom | 1 | 1 | 1 | 1 | 0 | 0 |
| 310343 | Breast cancer  | Bjerkaas    | 2013 | Prospective cohort | Norway                                                                                      | 0 | 0 | 0 | 1 | 1 | 0 |
| 310352 | Breast cancer  | Luo         | 2011 | Prospective cohort | United States                                                                               | 0 | 0 | 0 | 1 | 0 | 0 |
| 310353 | Breast cancer  | Xue         | 2011 | Prospective cohort | United States                                                                               | 0 | 0 | 0 | 0 | 0 | 1 |
| 310366 | Breast cancer  | Magnusson   | 2007 | Case-control       | Sweden                                                                                      | 1 | 0 | 0 | 1 | 0 | 1 |
| 310414 | Breast cancer  | Gram        | 2005 | Prospective cohort | Norway, Sweden                                                                              | 0 | 0 | 0 | 1 | 0 | 0 |
| 310428 | Breast cancer  | Li          | 2005 | Case-control       | United States                                                                               | 0 | 0 | 0 | 1 | 1 | 1 |
| 310438 | Breast cancer  | Reynolds    | 2004 | Prospective cohort | United States                                                                               | 0 | 0 | 0 | 1 | 0 | 1 |
| 310463 | Breast cancer  | Gammon      | 1998 | Case-control       | United States                                                                               | 0 | 0 | 0 | 1 | 0 | 1 |
| 310487 | Breast cancer  | Chu         | 1990 | Case-control       | United States                                                                               | 0 | 0 | 0 | 1 | 0 | 1 |
| 310487 | Breast cancer  | Chu         | 1990 | Case-control       | United States                                                                               | 1 | 1 | 1 | 1 | 0 | 1 |
| 328339 | Breast cancer  | Ozasa       | 2007 | Prospective cohort | Japan                                                                                       | 1 | 0 | 0 | 1 | 0 | 0 |



|        |               |                 |      |                     |                                                                                                                                                                                                                                                                                                                                   |   |   |   |   |   |   |
|--------|---------------|-----------------|------|---------------------|-----------------------------------------------------------------------------------------------------------------------------------------------------------------------------------------------------------------------------------------------------------------------------------------------------------------------------------|---|---|---|---|---|---|
| 358689 | Breast cancer | Lemogne         | 2013 | Prospective cohort  | France                                                                                                                                                                                                                                                                                                                            | 0 | 0 | 0 | 1 | 0 | 1 |
| 359074 | Breast cancer | Jones           | 2017 | Prospective cohort  | United Kingdom                                                                                                                                                                                                                                                                                                                    | 0 | 0 | 0 | 0 | 0 | 1 |
| 359076 | Breast cancer | Van den Brandt  | 2017 | Case-cohort         | Netherlands                                                                                                                                                                                                                                                                                                                       | 0 | 0 | 0 | 1 | 1 | 0 |
| 359078 | Breast cancer | White           | 2017 | Prospective cohort  | United States, Puerto Rico                                                                                                                                                                                                                                                                                                        | 0 | 0 | 0 | 1 | 0 | 1 |
| 359082 | Breast cancer | Conlon          | 2010 | Case-control        | Canada                                                                                                                                                                                                                                                                                                                            | 1 | 1 | 0 | 1 | 0 | 1 |
| 359086 | Breast cancer | Kawai           | 2014 | Case-control        | United States                                                                                                                                                                                                                                                                                                                     | 1 | 0 | 0 | 1 | 0 | 1 |
| 359094 | Breast cancer | Arthur          | 2017 | Nested case-control | United States                                                                                                                                                                                                                                                                                                                     | 1 | 1 | 1 | 1 | 0 | 1 |
| 448179 | Breast cancer | Gram            | 2016 | Prospective cohort  | Norway                                                                                                                                                                                                                                                                                                                            | 1 | 1 | 1 | 1 | 1 | 0 |
| 502130 | Breast cancer | Mezzouso        | 2021 | Prospective cohort  | Italy                                                                                                                                                                                                                                                                                                                             | 1 | 0 | 0 | 1 | 0 | 0 |
| 502184 | Breast cancer | Viner           | 2019 | Prospective cohort  | Canada                                                                                                                                                                                                                                                                                                                            | 0 | 0 | 0 | 1 | 0 | 1 |
| 502439 | Breast cancer | Ellingjord-Dale | 2017 | Nested case-control | Norway                                                                                                                                                                                                                                                                                                                            | 1 | 1 | 1 | 1 | 0 | 0 |
| 115406 | COPD          | Van Durme       | 2009 | Prospective cohort  | Netherlands                                                                                                                                                                                                                                                                                                                       | 1 | 1 | 0 | 1 | 1 | 0 |
| 315813 | COPD          | Johannessen     | 2005 | Prospective cohort  | Norway                                                                                                                                                                                                                                                                                                                            | 1 | 0 | 0 | 1 | 0 | 0 |
| 343461 | COPD          | Hirayama        | 1990 | Prospective cohort  | Japan                                                                                                                                                                                                                                                                                                                             | 1 | 1 | 0 | 1 | 0 | 0 |
| 356165 | COPD          | Forey           | 2011 | Meta-analysis       | United Kingdom, Italy, Chile, Canada, United States, Poland, Sweden, Norway, China, Belgium, Spain, Greece, South Africa, Turkey, Japan, Netherlands, Denmark, Nigeria, Finland, France, India, South Korea, Czechia, Slovakia, Taiwan, Iceland, Thailand, Australia, Brazil, Mexico, Uruguay, Venezuela, Estonia, Germany, Nepal | 1 | 1 | 0 | 1 | 0 | 1 |
| 356273 | COPD          | Leem            | 2018 | Prospective cohort  | Republic of Korea                                                                                                                                                                                                                                                                                                                 | 1 | 0 | 0 | 0 | 0 | 0 |
| 356275 | COPD          | Deng            | 2017 | Case-control        | China                                                                                                                                                                                                                                                                                                                             | 1 | 0 | 0 | 1 | 0 | 1 |
| 356342 | COPD          | Omori           | 2011 | Prospective cohort  | Japan                                                                                                                                                                                                                                                                                                                             | 1 | 0 | 0 | 0 | 0 | 1 |
| 356344 | COPD          | Perez-Padilla   | 1996 | Case-control        | Mexico                                                                                                                                                                                                                                                                                                                            | 1 | 1 | 1 | 1 | 0 | 1 |

|        |                         |               |      |                     |                                                                                                     |   |   |   |   |   |   |
|--------|-------------------------|---------------|------|---------------------|-----------------------------------------------------------------------------------------------------|---|---|---|---|---|---|
| 426275 | COPD                    | Thun          | 2013 | Prospective cohort  | United States                                                                                       | 1 | 0 | 0 | 1 | 0 | 1 |
| 426275 | COPD                    | Thun          | 2013 | Prospective cohort  | United States, Puerto Rico, Guam                                                                    | 1 | 0 | 0 | 1 | 0 | 1 |
| 426275 | COPD                    | Thun          | 2013 | Prospective cohort  | United States                                                                                       | 1 | 0 | 0 | 1 | 0 | 0 |
| 426275 | COPD                    | Thun          | 2013 | Prospective cohort  | United States, Puerto Rico, Guam                                                                    | 1 | 0 | 0 | 1 | 0 | 0 |
| 502093 | COPD                    | Ganbold       | 2021 | Both                | Mongolia                                                                                            | 0 | 0 | 0 | 1 | 0 | 0 |
| 502095 | COPD                    | Zhang         | 2021 | Prospective cohort  | United Kingdom                                                                                      | 0 | 0 | 0 | 1 | 0 | 0 |
| 502107 | COPD                    | Thomson       | 2021 | Prospective cohort  | Mexico                                                                                              | 0 | 0 | 0 | 0 | 0 | 0 |
| 502472 | COPD                    | Li            | 2019 | Both                | China                                                                                               | 1 | 1 | 1 | 1 | 1 | 1 |
| 261496 | Cataracts               | Weintraub     | 2002 | Prospective cohort  | United States                                                                                       | 0 | 0 | 0 | 0 | 0 | 1 |
| 261527 | Cataracts               | Hiller        | 1997 | Prospective cohort  | United States                                                                                       | 1 | 0 | 0 | 1 | 1 | 1 |
| 263023 | Cataracts               | Lindblad      | 2005 | Prospective cohort  | Sweden                                                                                              | 0 | 0 | 0 | 1 | 0 | 1 |
| 350491 | Cataracts               | Flaye         | 1989 | Prospective cohort  | United Kingdom                                                                                      | 1 | 1 | 1 | 0 | 1 | 0 |
| 350493 | Cataracts               | Hankinson     | 1992 | Prospective cohort  | United States                                                                                       | 0 | 0 | 0 | 1 | 0 | 0 |
| 359116 | Cataracts               | Floud         | 2016 | Prospective cohort  | United Kingdom                                                                                      | 0 | 0 | 0 | 1 | 0 | 1 |
| 359118 | Cataracts               | Lindblad      | 2014 | Prospective cohort  | Sweden                                                                                              | 0 | 0 | 0 | 1 | 0 | 0 |
| 359119 | Cataracts               | Christen      | 1992 | Prospective cohort  | United States                                                                                       | 0 | 0 | 0 | 1 | 0 | 1 |
| 359119 | Cataracts               | Christen      | 1992 | Prospective cohort  | United States                                                                                       | 1 | 1 | 0 | 1 | 0 | 1 |
| 359121 | Cataracts               | Phillips      | 1996 | Case-control        | Scotland, United Kingdom                                                                            | 1 | 1 | 0 | 1 | 0 | 1 |
| 501958 | Cataracts               | Jiaqing Zhang | 2021 | Prospective Cohort  | Australia                                                                                           | 1 | 1 | 1 | 1 | 0 | 0 |
| 328339 | Cervical cancer         | Ozasa         | 2007 | Prospective cohort  | Japan                                                                                               | 1 | 0 | 0 | 1 | 0 | 0 |
| 347864 | Cervical cancer         | Ylitalo       | 1999 | Nested case-control | Sweden                                                                                              | 1 | 1 | 1 | 1 | 0 | 0 |
| 358583 | Cervical cancer         | Roura         | 2013 | Prospective cohort  | Denmark, France, Germany, Greece, Italy, the Netherlands, Norway, Spain, Sweden, the United Kingdom | 1 | 1 | 1 | 1 | 0 | 0 |
| 502130 | Cervical cancer         | Mezzoiuso     | 2021 | Prospective cohort  | Italy                                                                                               | 1 | 0 | 0 | 1 | 0 | 0 |
| 164581 | Colon and rectum cancer | Shimizu       | 2003 | Prospective cohort  | Japan                                                                                               | 0 | 0 | 0 | 1 | 1 | 1 |
| 309619 | Colon and rectum cancer | Otani         | 2003 | Prospective cohort  | Japan                                                                                               | 0 | 0 | 0 | 1 | 0 | 1 |
| 328339 | Colon and rectum cancer | Ozasa         | 2007 | Prospective cohort  | Japan                                                                                               | 1 | 0 | 0 | 1 | 1 | 1 |

|        |                         |              |      |                     |                   |   |   |   |   |   |   |
|--------|-------------------------|--------------|------|---------------------|-------------------|---|---|---|---|---|---|
| 343580 | Colon and rectum cancer | Siemiatycki  | 1995 | Case-control        | Canada            | 1 | 1 | 1 | 1 | 0 | 0 |
| 347927 | Colon and rectum cancer | Limburg      | 2003 | Prospective cohort  | United States     | 0 | 0 | 0 | 1 | 1 | 1 |
| 347932 | Colon and rectum cancer | Gram         | 2009 | Prospective cohort  | Norway            | 0 | 0 | 0 | 1 | 0 | 0 |
| 347935 | Colon and rectum cancer | Hooker       | 2008 | Prospective cohort  | United States     | 1 | 0 | 0 | 1 | 0 | 1 |
| 358658 | Colon and rectum cancer | Cross        | 2014 | Nested case-control | United States     | 0 | 0 | 0 | 1 | 1 | 1 |
| 358689 | Colon and rectum cancer | Lemogne      | 2013 | Prospective cohort  | France            | 0 | 0 | 0 | 1 | 0 | 1 |
| 502130 | Colon and rectum cancer | Mezzoiuso    | 2021 | Prospective cohort  | Italy             | 1 | 0 | 0 | 1 | 0 | 0 |
| 502135 | Colon and rectum cancer | Chen         | 2021 | Prospective cohort  | Taiwan            | 0 | 0 | 0 | 1 | 0 | 1 |
| 502139 | Colon and rectum cancer | Ugai         | 2022 | Prospective cohort  | United States     | 0 | 0 | 0 | 0 | 0 | 1 |
| 502184 | Colon and rectum cancer | Viner        | 2019 | Prospective cohort  | Canada            | 0 | 0 | 0 | 1 | 0 | 1 |
| 502196 | Colon and rectum cancer | Chottanapund | 2021 | Case-control        | Thailand          | 1 | 0 | 0 | 1 | 0 | 0 |
| 502236 | Colon and rectum cancer | Lee          | 2019 | Case-control        | Republic of Korea | 0 | 0 | 0 | 1 | 0 | 0 |
| 502484 | Colon and rectum cancer | Roh          | 2021 | Prospective cohort  | Republic of Korea | 1 | 0 | 0 | 1 | 0 | 1 |
| 298512 | Esophageal cancer       | Ishiguro     | 2009 | Prospective cohort  | Japan             | 0 | 0 | 0 | 1 | 0 | 1 |
| 309841 | Esophageal cancer       | Gao          | 1994 | Case-control        | China             | 0 | 0 | 0 | 1 | 0 | 1 |
| 328266 | Esophageal cancer       | Liaw         | 1998 | Prospective cohort  | Taiwan            | 1 | 0 | 0 | 1 | 0 | 0 |
| 328339 | Esophageal cancer       | Ozasa        | 2007 | Prospective cohort  | Japan             | 1 | 0 | 0 | 1 | 0 | 0 |
| 339730 | Esophageal cancer       | Cheng        | 2000 | Case-control        | United Kingdom    | 1 | 1 | 0 | 1 | 0 | 1 |
| 343383 | Esophageal cancer       | Vaughan      | 1995 | Case-control        | United States     | 0 | 0 | 0 | 1 | 0 | 0 |
| 343580 | Esophageal cancer       | Siemiatycki  | 1995 | Case-control        | Canada            | 1 | 1 | 1 | 1 | 0 | 0 |
| 345310 | Esophageal cancer       | Sakata       | 2005 | Prospective cohort  | Japan             | 1 | 0 | 0 | 1 | 0 | 0 |
| 345324 | Esophageal cancer       | Matsuo       | 2001 | Case-control        | Japan             | 1 | 1 | 0 | 1 | 0 | 1 |
| 345328 | Esophageal cancer       | Yokoyama     | 2002 | Case-control        | Japan             | 1 | 1 | 0 | 1 | 0 | 0 |
| 439528 | Esophageal cancer       | Jin          | 2019 | Case-control        | China             | 0 | 0 | 0 | 1 | 0 | 1 |
| 500795 | Esophageal cancer       | Jayalekshmi  | 2021 | Prospective cohort  | India             | 1 | 1 | 1 | 1 | 0 | 0 |
| 502130 | Esophageal cancer       | Mezzoiuso    | 2021 | Prospective cohort  | Italy             | 1 | 0 | 0 | 1 | 0 | 0 |
| 502488 | Esophageal cancer       | Okello       | 2021 | Case-control        | Uganda            | 0 | 0 | 0 | 1 | 0 | 1 |
| 350721 | Gallbladder disease     | Stampfer     | 1992 | Prospective cohort  | United States     | 0 | 0 | 0 | 1 | 0 | 1 |
| 350723 | Gallbladder disease     | Liu          | 2009 | Prospective cohort  | United Kingdom    | 0 | 0 | 0 | 1 | 0 | 1 |
| 350725 | Gallbladder disease     | Sahi         | 1998 | Prospective cohort  | United States     | 0 | 0 | 0 | 1 | 0 | 1 |

|        |                        |                  |      |                           |                                                                            |   |   |   |   |   |   |
|--------|------------------------|------------------|------|---------------------------|----------------------------------------------------------------------------|---|---|---|---|---|---|
| 351491 | Gallbladder disease    | Layde            | 1982 | Prospective cohort        | United Kingdom                                                             | 1 | 1 | 1 | 1 | 0 | 1 |
| 351491 | Gallbladder disease    | Layde            | 1982 | Prospective cohort        | United Kingdom                                                             | 0 | 0 | 0 | 1 | 0 | 1 |
| 165539 | Ischemic heart disease | Jacobs           | 1999 | Prospective cohort        | United States, Finland, Netherlands, Italy, Croatia, Serbia, Greece, Japan | 0 | 0 | 0 | 1 | 0 | 1 |
| 174238 | Ischemic heart disease | Doll             | 2004 | Prospective cohort        | United Kingdom                                                             | 1 | 0 | 0 | 0 | 0 | 1 |
| 236194 | Ischemic heart disease | Bjartveit        | 1005 | Prospective cohort        | Norway                                                                     | 1 | 1 | 0 | 1 | 0 | 0 |
| 236197 | Ischemic heart disease | Pirie            | 2013 | Prospective cohort        | United Kingdom                                                             | 0 | 0 | 0 | 1 | 0 | 0 |
| 249384 | Ischemic heart disease | Iversen          | 2013 | Prospective cohort        | Norway                                                                     | 1 | 1 | 1 | 1 | 0 | 1 |
| 298268 | Ischemic heart disease | Gun              | 2006 | Prospective cohort        | Australia                                                                  | 1 | 0 | 0 | 1 | 0 | 0 |
| 309699 | Ischemic heart disease | Kalandidi        | 1992 | Case-control              | Greece                                                                     | 1 | 0 | 0 | 1 | 0 | 1 |
| 309729 | Ischemic heart disease | Tavani           | 2004 | Pooled case-control       | Italy                                                                      | 0 | 0 | 0 | 1 | 1 | 1 |
| 309729 | Ischemic heart disease | Tavani           | 2004 | Pooled case-control       | Italy                                                                      | 0 | 0 | 0 | 1 | 0 | 1 |
| 328259 | Ischemic heart disease | Nilsson          | 2001 | Prospective cohort        | Sweden                                                                     | 1 | 0 | 0 | 1 | 0 | 0 |
| 328274 | Ischemic heart disease | Chen             | 1997 | Prospective cohort        | China                                                                      | 1 | 0 | 0 | 1 | 0 | 1 |
| 328460 | Ischemic heart disease | Kono             | 1985 | Prospective cohort        | Japan                                                                      | 1 | 1 | 0 | 1 | 0 | 1 |
| 328472 | Ischemic heart disease | Yuan             | 1996 | Prospective cohort        | China                                                                      | 1 | 0 | 0 | 1 | 0 | 1 |
| 330932 | Ischemic heart disease | Lam              | 2007 | Prospective cohort        | China                                                                      | 0 | 0 | 0 | 1 | 1 | 0 |
| 331705 | Ischemic heart disease | Lawlor           | 2008 | Prospective cohort        | Republic of Korea                                                          | 0 | 0 | 0 | 1 | 0 | 0 |
| 332104 | Ischemic heart disease | Shaper           | 2003 | Prospective cohort        | United Kingdom                                                             | 0 | 0 | 0 | 1 | 0 | 1 |
| 334410 | Ischemic heart disease | Kuller           | 1991 | Prospective cohort        | United States                                                              | 1 | 0 | 0 | 1 | 0 | 0 |
| 335266 | Ischemic heart disease | Molshatzki       | 2013 | Prospective cohort        | Israel                                                                     | 0 | 0 | 0 | 1 | 0 | 0 |
| 335762 | Ischemic heart disease | Zhang            | 2011 | Prospective cohort        | Germany                                                                    | 0 | 0 | 0 | 1 | 0 | 0 |
| 336216 | Ischemic heart disease | Thun             | 2013 | Pooled prospective cohort | United States                                                              | 1 | 0 | 0 | 1 | 1 | 0 |
| 336319 | Ischemic heart disease | Jamrozik         | 2011 | Pooled prospective cohort | Australia                                                                  | 0 | 0 | 0 | 1 | 1 | 0 |
| 336682 | Ischemic heart disease | Jonsdottir       | 2002 | Prospective cohort        | Iceland                                                                    | 0 | 0 | 0 | 1 | 0 | 0 |
| 336801 | Ischemic heart disease | Woodward         | 2005 | Pooled prospective cohort | Multi-country                                                              | 1 | 1 | 1 | 1 | 0 | 1 |
| 343310 | Ischemic heart disease | Prescott         | 2002 | Prospective cohort        | Denmark                                                                    | 0 | 0 | 0 | 1 | 0 | 0 |
| 343312 | Ischemic heart disease | Ehteshami-Afshar | 2014 | Prospective cohort        | Iran                                                                       | 0 | 0 | 0 | 1 | 0 | 0 |
| 343400 | Ischemic heart disease | Kawachi          | 1994 | Prospective cohort        | United States                                                              | 1 | 1 | 0 | 0 | 0 | 1 |

|        |                        |               |      |                           |                        |   |   |   |   |   |   |
|--------|------------------------|---------------|------|---------------------------|------------------------|---|---|---|---|---|---|
| 343461 | Ischemic heart disease | Hirayama      | 1990 | Prospective cohort        | Japan                  | 1 | 1 | 0 | 1 | 0 | 0 |
| 355955 | Ischemic heart disease | Doll          | 1980 | Prospective cohort        | United Kingdom         | 1 | 1 | 0 | 0 | 0 | 1 |
| 355955 | Ischemic heart disease | Doll          | 1980 | Prospective cohort        | United Kingdom         | 1 | 1 | 0 | 1 | 1 | 0 |
| 355955 | Ischemic heart disease | Doll          | 1980 | Prospective cohort        | United Kingdom         | 1 | 1 | 0 | 1 | 0 | 0 |
| 356107 | Ischemic heart disease | Lv            | 2017 | Prospective cohort        | China                  | 1 | 0 | 0 | 1 | 0 | 0 |
| 356109 | Ischemic heart disease | Watt          | 1995 | Prospective cohort        | United Kingdom         | 1 | 1 | 0 | 1 | 0 | 1 |
| 356114 | Ischemic heart disease | Schnohr       | 2015 | Prospective cohort        | Denmark                | 1 | 1 | 1 | 1 | 0 | 0 |
| 356141 | Ischemic heart disease | Lubin         | 2016 | Prospective cohort        | United States          | 0 | 0 | 0 | 1 | 0 | 0 |
| 356143 | Ischemic heart disease | Lubin         | 2017 | Pooled prospective cohort | Finland, United States | 0 | 0 | 0 | 1 | 0 | 0 |
| 356143 | Ischemic heart disease | Lubin         | 2017 | Pooled prospective cohort | Finland, United States | 1 | 1 | 1 | 1 | 0 | 0 |
| 357254 | Ischemic heart disease | Hippisley-Cox | 2015 | Prospective cohort        | United Kingdom         | 1 | 1 | 1 | 1 | 0 | 0 |
| 357264 | Ischemic heart disease | Ciruzzi       | 2002 | Case-control              | Argentina              | 1 | 1 | 0 | 1 | 1 | 0 |
| 357264 | Ischemic heart disease | Ciruzzi       | 2002 | Case-control              | Argentina              | 0 | 0 | 0 | 1 | 1 | 0 |
| 357274 | Ischemic heart disease | Dunn          | 1999 | Case-control              | United Kingdom         | 1 | 1 | 0 | 1 | 0 | 1 |
| 357353 | Ischemic heart disease | Gramenzi      | 1989 | Case-control              | Italy                  | 0 | 0 | 0 | 1 | 0 | 1 |
| 357373 | Ischemic heart disease | Ismail        | 2004 | Case-control              | Pakistan               | 1 | 1 | 0 | 1 | 0 | 1 |
| 357410 | Ischemic heart disease | Kabagambe     | 2007 | Case-control              | Costa Rica             | 0 | 0 | 0 | 1 | 0 | 1 |
| 357413 | Ischemic heart disease | Miyake        | 2000 | Case-control              | Japan                  | 0 | 0 | 0 | 1 | 0 | 1 |
| 357413 | Ischemic heart disease | Miyake        | 2000 | Case-control              | Japan                  | 0 | 0 | 0 | 1 | 1 | 1 |
| 357427 | Ischemic heart disease | Oliveira      | 2007 | Case-control              | Portugal               | 0 | 0 | 0 | 1 | 0 | 1 |
| 357429 | Ischemic heart disease | Oliveira      | 2009 | Case-control              | Portugal               | 0 | 0 | 0 | 1 | 0 | 1 |
| 357441 | Ischemic heart disease | Pais          | 1996 | Case-control              | India                  | 1 | 1 | 0 | 1 | 0 | 1 |
| 357453 | Ischemic heart disease | Piegas        | 2003 | Case-control              | Bazil                  | 1 | 1 | 0 | 1 | 0 | 1 |
| 357456 | Ischemic heart disease | Quek          | 1989 | Case-control              | Malaysia               | 1 | 1 | 1 | 1 | 0 | 1 |
| 357927 | Ischemic heart disease | Rastogi       | 2005 | Case-control              | India                  | 0 | 0 | 0 | 1 | 0 | 1 |
| 357948 | Ischemic heart disease | Rosenberg     | 1983 | Case-control              | United States          | 1 | 1 | 0 | 1 | 0 | 1 |
| 357952 | Ischemic heart disease | Rosenberg     | 1999 | Case-control              | United States          | 0 | 0 | 0 | 1 | 0 | 1 |
| 357956 | Ischemic heart disease | Rosenberg     | 2001 | Case-control              | United States          | 1 | 0 | 0 | 1 | 0 | 1 |
| 357959 | Ischemic heart disease | Rossi         | 2011 | Case-control              | Costa Rica             | 0 | 0 | 0 | 1 | 0 | 1 |
| 358054 | Ischemic heart disease | Suh           | 2001 | Case-control              | Republic of Korea      | 1 | 0 | 0 | 1 | 0 | 1 |

|        |                        |              |      |                     |                                                    |   |   |   |   |   |   |
|--------|------------------------|--------------|------|---------------------|----------------------------------------------------|---|---|---|---|---|---|
| 358066 | Ischemic heart disease | Bosetti      | 1999 | Pooled case-control | Italy                                              | 0 | 0 | 0 | 1 | 0 | 1 |
| 359113 | Ischemic heart disease | Rosenberg    | 1985 | Case-control        | United States                                      | 1 | 1 | 0 | 1 | 0 | 1 |
| 359114 | Ischemic heart disease | Willett      | 1981 | Case-control        | United States                                      | 1 | 1 | 0 | 1 | 0 | 1 |
| 359115 | Ischemic heart disease | Palmer       | 1989 | Case-control        | United States                                      | 0 | 0 | 0 | 1 | 0 | 1 |
| 359320 | Ischemic heart disease | Kaufman      | 1983 | Case-control        | United States                                      | 0 | 0 | 0 | 1 | 0 | 1 |
| 432350 | Ischemic heart disease | Zhu          | 2019 | Prospective cohort  | China                                              | 0 | 0 | 0 | 1 | 0 | 0 |
| 462792 | Ischemic heart disease | Banks        | 2019 | Prospective cohort  | Australia                                          | 0 | 0 | 0 | 0 | 0 | 1 |
| 501896 | Ischemic heart disease | Ding         | 2020 | Prospective cohort  | United States                                      | 0 | 0 | 0 | 1 | 0 | 0 |
| 502077 | Ischemic heart disease | Jee          | 2019 | Prospective cohort  | Republic of Korea                                  | 1 | 1 | 1 | 1 | 0 | 1 |
| 502134 | Ischemic heart disease | Wilsgaard    | 2020 | Prospective cohort  | Norway                                             | 0 | 0 | 0 | 1 | 0 | 0 |
| 164492 | Kidney cancer          | Flaherty     | 2005 | Prospective cohort  | United States                                      | 1 | 0 | 0 | 1 | 0 | 1 |
| 164580 | Kidney cancer          | Setiawan     | 2007 | Prospective cohort  | United States                                      | 0 | 0 | 0 | 1 | 0 | 0 |
| 328339 | Kidney cancer          | Ozasa        | 2007 | Prospective cohort  | Japan                                              | 1 | 0 | 0 | 1 | 0 | 0 |
| 343155 | Kidney cancer          | Chiu         | 2001 | Case-control        | United States                                      | 0 | 0 | 0 | 1 | 0 | 1 |
| 343580 | Kidney cancer          | Siemiatycki  | 1995 | Case-control        | Canada                                             | 1 | 1 | 1 | 1 | 0 | 0 |
| 358807 | Kidney cancer          | McCredie     | 1992 | Case-control        | Australia                                          | 1 | 0 | 0 | 1 | 0 | 1 |
| 358809 | Kidney cancer          | Schlehofer   | 1995 | Case-control        | Germany                                            | 1 | 1 | 0 | 1 | 0 | 1 |
| 358812 | Kidney cancer          | Muscat       | 1995 | Case-control        | United States                                      | 1 | 0 | 0 | 1 | 0 | 1 |
| 358814 | Kidney cancer          | Semenza      | 2001 | Case-control        | United States                                      | 1 | 0 | 0 | 1 | 0 | 1 |
| 413175 | Kidney cancer          | Hu           | 2005 | Case-control        | Canada                                             | 0 | 0 | 0 | 1 | 0 | 0 |
| 502130 | Kidney cancer          | Mezzoiuso    | 2021 | Prospective cohort  | Italy                                              | 1 | 0 | 0 | 1 | 0 | 0 |
| 502132 | Kidney cancer          | Minami       | 2021 | Prospective cohort  | Japan                                              | 1 | 1 | 1 | 1 | 0 | 0 |
| 502217 | Kidney cancer          | Everatt      | 2019 | Prospective cohort  | Lithuania                                          | 1 | 0 | 0 | 1 | 0 | 0 |
| 502427 | Kidney cancer          | Theis        | 2008 | Case-control        | United States                                      | 1 | 0 | 0 | 1 | 0 | 1 |
| 502427 | Kidney cancer          | Theis        | 2008 | Case-control        | United States                                      | 1 | 0 | 0 | 1 | 0 | 0 |
| 502441 | Kidney cancer          | Mellempgaard | 1994 | Case-control        | Denmark                                            | 1 | 1 | 1 | 1 | 0 | 0 |
| 502448 | Kidney cancer          | Demirel      | 2008 | Case-control        | Russia, Romania, Poland, Czech Republic            | 1 | 0 | 0 | 1 | 0 | 1 |
| 502478 | Kidney cancer          | McLaughlin   | 1995 | Case-control        | Australia, Denmark, Germany, Sweden, United States | 1 | 0 | 0 | 1 | 0 | 1 |
| 502480 | Kidney cancer          | McLaughlin   | 1992 | Case-control        | China                                              | 1 | 0 | 0 | 1 | 0 | 1 |

|        |                            |                         |      |                     |                                                                                                                                                                                   |   |   |   |   |   |   |
|--------|----------------------------|-------------------------|------|---------------------|-----------------------------------------------------------------------------------------------------------------------------------------------------------------------------------|---|---|---|---|---|---|
| 298142 | Laryngeal cancer           | Dosemeci                | 1997 | Case-control        | Turkey                                                                                                                                                                            | 1 | 0 | 0 | 1 | 0 | 1 |
| 298147 | Laryngeal cancer           | Zheng                   | 1992 | Case-control        | China                                                                                                                                                                             | 1 | 0 | 0 | 1 | 0 | 1 |
| 343375 | Laryngeal cancer           | Schlecht                | 1999 | Case-control        | Brazil                                                                                                                                                                            | 0 | 0 | 0 | 1 | 0 | 1 |
| 364113 | Laryngeal cancer           | Lubin                   | 2010 | Pooled case-control | Multi-country                                                                                                                                                                     | 0 | 0 | 0 | 1 | 0 | 1 |
| 502130 | Laryngeal cancer           | Mezzoiuso               | 2021 | Prospective cohort  | Italy                                                                                                                                                                             | 1 | 0 | 0 | 1 | 0 | 0 |
| 328339 | Leukemia                   | Ozasa                   | 2007 | Prospective cohort  | Japan                                                                                                                                                                             | 1 | 0 | 0 | 1 | 1 | 0 |
| 343390 | Leukemia                   | Ugai                    | 2017 | Prospective cohort  | Japan                                                                                                                                                                             | 1 | 0 | 0 | 1 | 0 | 0 |
| 343390 | Leukemia                   | Ugai                    | 2017 | Prospective cohort  | Japan                                                                                                                                                                             | 1 | 1 | 0 | 1 | 0 | 0 |
| 502130 | Leukemia                   | Mezzoiuso               | 2021 | Prospective cohort  | Italy                                                                                                                                                                             | 1 | 0 | 0 | 1 | 0 | 0 |
| 502184 | Leukemia                   | Viner                   | 2019 | Prospective cohort  | Canada                                                                                                                                                                            | 0 | 0 | 0 | 1 | 0 | 1 |
| 502395 | Leukemia                   | Björk                   | 2009 | Case-control        | Sweden                                                                                                                                                                            | 1 | 0 | 0 | 1 | 0 | 1 |
| 502397 | Leukemia                   | Wong                    | 2009 | Case-control        | China                                                                                                                                                                             | 1 | 1 | 0 | 1 | 0 | 1 |
| 502419 | Leukemia                   | Kasim                   | 2005 | Case-control        | Canada                                                                                                                                                                            | 1 | 0 | 0 | 1 | 0 | 0 |
| 286841 | Lip and oral cavity cancer | Muwonge R               | 2008 | case-control        | India                                                                                                                                                                             | 1 | 1 | 1 | 1 | 0 | 0 |
| 343375 | Lip and oral cavity cancer | Schlecht                | 1999 | Case-control        | Brazil                                                                                                                                                                            | 0 | 0 | 0 | 0 | 0 | 0 |
| 343432 | Lip and oral cavity cancer | Zheng T                 | 1997 | case-control        | China                                                                                                                                                                             | 1 | 0 | 0 | 1 | 0 | 1 |
| 348052 | Lip and oral cavity cancer | Macfarlane              | 1995 | Pooled case-control | China, United States, Italy                                                                                                                                                       | 0 | 0 | 0 | 1 | 0 | 1 |
| 359126 | Lip and oral cavity cancer | Fu                      | 2013 | Case-control        | China                                                                                                                                                                             | 1 | 0 | 0 | 1 | 0 | 1 |
| 359128 | Lip and oral cavity cancer | Lu                      | 2018 | Prospective cohort  | Japan                                                                                                                                                                             | 0 | 0 | 0 | 1 | 0 | 0 |
| 364113 | Lip and oral cavity cancer | Lubin                   | 2010 | Pooled case-control | Italy, Switzerland, Slovakia, Romania, Hungary, Poland, Russia, United States, Puerto Rico, Argentina, Cuba, Brazil, Spain, Ireland, Canada, Australia, India, Sudan, South Sudan | 0 | 0 | 0 | 1 | 0 | 1 |
| 502130 | Lip and oral cavity cancer | Angelo Giosuè Mezzoiuso | 2021 | Prospective cohort  | Italy                                                                                                                                                                             | 1 | 0 | 0 | 1 | 0 | 0 |
| 502243 | Lip and oral cavity cancer | Isabela Firigato        | 2022 | case-control        | Brazil                                                                                                                                                                            | 1 | 0 | 0 | 1 | 0 | 1 |
| 502352 | Lip and oral cavity cancer | Su, WZ                  | 1998 | case-control        | China                                                                                                                                                                             | 1 | 0 | 0 | 1 | 0 | 0 |
| 125938 | Liver cancer               | Marrero                 | 2005 | Case-control        | United States                                                                                                                                                                     | 1 | 0 | 0 | 1 | 0 | 1 |
| 293871 | Liver cancer               | Shin                    | 1996 | Case-control        | Republic of Korea                                                                                                                                                                 | 1 | 0 | 0 | 1 | 0 | 1 |

|        |                             |             |      |                     |                          |   |   |   |   |   |   |
|--------|-----------------------------|-------------|------|---------------------|--------------------------|---|---|---|---|---|---|
| 328266 | Liver cancer                | Liaw        | 1998 | Prospective cohort  | Taiwan                   | 1 | 1 | 1 | 1 | 0 | 0 |
| 328339 | Liver cancer                | Ozasa       | 2007 | Prospective cohort  | Japan                    | 1 | 0 | 0 | 1 | 0 | 0 |
| 343515 | Liver cancer                | Austin      | 1986 | Case-control        | United States            | 1 | 0 | 0 | 1 | 0 | 1 |
| 343580 | Liver cancer                | Siemiatycki | 1995 | Case-control        | Canada                   | 0 | 0 | 0 | 1 | 0 | 1 |
| 343580 | Liver cancer                | Siemiatycki | 1995 | Case-control        | Canada                   | 1 | 1 | 1 | 1 | 0 | 0 |
| 343586 | Liver cancer                | Matsuo      | 2003 | Case-control        | Japan                    | 1 | 0 | 0 | 1 | 0 | 1 |
| 343588 | Liver cancer                | Munaka      | 2003 | Case-control        | Japan                    | 1 | 1 | 0 | 1 | 0 | 1 |
| 343590 | Liver cancer                | Gelatti     | 2005 | Case-control        | Italy                    | 0 | 0 | 0 | 1 | 0 | 1 |
| 343632 | Liver cancer                | Tanaka      | 1995 | Pooled case-control | Japan                    | 1 | 1 | 0 | 1 | 0 | 1 |
| 502130 | Liver cancer                | Mezzouiuso  | 2021 | Prospective cohort  | Italy                    | 1 | 0 | 0 | 1 | 0 | 0 |
| 259680 | Lower back pain             | Mustard     | 2005 | Prospective cohort  | Canada                   | 1 | 1 | 1 | 1 | 0 | 1 |
| 348202 | Lower back pain             | Tubach      | 2002 | Prospective cohort  | France                   | 1 | 1 | 1 | 1 | 0 | 1 |
| 348204 | Lower back pain             | Feldman     | 1999 | Prospective cohort  | Canada                   | 0 | 0 | 0 | 1 | 0 | 1 |
| 348206 | Lower back pain             | Mikkonen    | 2008 | Prospective cohort  | Finland                  | 1 | 1 | 1 | 1 | 0 | 1 |
| 348208 | Lower back pain             | Hestback    | 2006 | Prospective cohort  | Denmark                  | 1 | 0 | 0 | 1 | 0 | 1 |
| 409803 | Lower back pain             | Ryden       | 1989 | Case-control        | United States            | 1 | 1 | 0 | 1 | 0 | 1 |
| 173863 | Lower respiratory infection | Doll        | 1994 | Prospective cohort  | United Kingdom           | 1 | 0 | 0 | 0 | 0 | 1 |
| 236197 | Lower respiratory infection | Pirie       | 2013 | Prospective cohort  | United Kingdom           | 1 | 1 | 1 | 1 | 0 | 1 |
| 298305 | Lower respiratory infection | Baik        | 2000 | Prospective cohort  | United States            | 1 | 0 | 0 | 1 | 0 | 0 |
| 355108 | Lower respiratory infection | Nuorti      | 2000 | Case-control        | Canada, United States    | 0 | 0 | 0 | 1 | 0 | 1 |
| 355112 | Lower respiratory infection | Almirall    | 1999 | Case-control        | Spain                    | 1 | 1 | 1 | 1 | 0 | 1 |
| 355955 | Lower respiratory infection | Doll        | 1980 | Prospective cohort  | United Kingdom           | 1 | 1 | 0 | 0 | 0 | 1 |
| 413804 | Lower respiratory infection | Hamer       | 2019 | Prospective cohort  | United Kingdom           | 0 | 0 | 0 | 1 | 0 | 1 |
| 413804 | Lower respiratory infection | Hamer       | 2019 | Prospective cohort  | United Kingdom, Scotland | 0 | 0 | 0 | 1 | 0 | 1 |
| 413804 | Lower respiratory infection | Hamer       | 2019 | Prospective cohort  | United Kingdom           | 0 | 0 | 0 | 1 | 0 | 0 |
| 413804 | Lower respiratory infection | Hamer       | 2019 | Prospective cohort  | United Kingdom, Scotland | 0 | 0 | 0 | 1 | 0 | 0 |
| 193948 | Lung cancer                 | Liu         | 1991 | Case-control        | China                    | 1 | 0 | 0 | 1 | 0 | 1 |



|        |             |                  |      |                     |                                                       |   |   |   |   |   |   |
|--------|-------------|------------------|------|---------------------|-------------------------------------------------------|---|---|---|---|---|---|
| 193987 | Lung cancer | Brownson         | 1987 | Case-control        | United States                                         | 1 | 1 | 0 | 1 | 0 | 1 |
| 250095 | Lung cancer | Marugame         | 2005 | Prospective cohort  | Japan                                                 | 1 | 0 | 0 | 1 | 0 | 1 |
| 286844 | Lung cancer | Dikshit          | 2000 | Case-control        | India                                                 | 1 | 1 | 0 | 1 | 0 | 1 |
| 298142 | Lung cancer | Dosemeci         | 1997 | Case-control        | Turkey                                                | 1 | 0 | 0 | 1 | 0 | 1 |
| 321342 | Lung cancer | Freedman         | 2015 | Prospective cohort  | United States                                         | 1 | 0 | 0 | 1 | 0 | 1 |
| 328215 | Lung cancer | Bae              | 2013 | Prospective cohort  | Republic of Korea                                     | 1 | 0 | 0 | 1 | 0 | 1 |
| 328266 | Lung cancer | Liaw             | 1998 | Prospective cohort  | Taiwan                                                | 1 | 1 | 0 | 0 | 0 | 0 |
| 328909 | Lung cancer | Everatt          | 2014 | Prospective cohort  | Lithuania                                             | 1 | 0 | 0 | 1 | 0 | 0 |
| 334460 | Lung cancer | Nordlund         | 1999 | Prospective cohort  | Sweden                                                | 1 | 1 | 0 | 1 | 0 | 0 |
| 343580 | Lung cancer | Siemiatycki      | 1995 | case-control        | Quebec, Canada                                        | 0 | 0 | 0 | 1 | 0 | 1 |
| 343580 | Lung cancer | Siemiatycki      | 1995 | case-control        | Quebec, Canada                                        | 1 | 1 | 1 | 1 | 0 | 0 |
| 355961 | Lung cancer | Chyou            | 1992 | Prospective cohort  | United States                                         | 1 | 1 | 0 | 1 | 0 | 1 |
| 355963 | Lung cancer | Potter           | 1991 | Nested case-control | United States                                         | 1 | 1 | 1 | 1 | 1 | 1 |
| 355965 | Lung cancer | Chyou            | 1993 | Prospective cohort  | United States                                         | 1 | 1 | 0 | 1 | 0 | 1 |
| 355970 | Lung cancer | Pesch            | 2012 | Pooled case-control | Europe, Canada                                        | 1 | 0 | 0 | 1 | 0 | 1 |
| 357351 | Lung cancer | Jockel           | 1992 | Case-control        | Germany                                               | 1 | 1 | 0 | 1 | 0 | 1 |
| 357367 | Lung cancer | Jockel           | 1997 | Case-control        | Germany                                               | 1 | 0 | 0 | 1 | 0 | 1 |
| 357400 | Lung cancer | De Stefani       | 1996 | Case-control        | Uruguay                                               | 1 | 0 | 0 | 1 | 0 | 1 |
| 357402 | Lung cancer | Lei              | 1996 | Case-control        | China                                                 | 1 | 1 | 0 | 1 | 0 | 1 |
| 357404 | Lung cancer | Pawlega          | 1997 | Case-control        | Poland                                                | 0 | 0 | 0 | 1 | 0 | 1 |
| 357406 | Lung cancer | Wunsch-Filho     | 1998 | Case-control        | Brazil                                                | 1 | 1 | 0 | 1 | 0 | 1 |
| 357415 | Lung cancer | Mao              | 2001 | Case-control        | Canada                                                | 1 | 0 | 0 | 1 | 0 | 1 |
| 357437 | Lung cancer | Barbone          | 1997 | Case-control        | Italy                                                 | 1 | 1 | 0 | 1 | 0 | 1 |
| 357447 | Lung cancer | Matos            | 1998 | Case-control        | Argentina                                             | 1 | 1 | 0 | 1 | 0 | 1 |
| 357451 | Lung cancer | De Stefani       | 1998 | Case-control        | Uruguay                                               | 1 | 0 | 0 | 1 | 0 | 1 |
| 357644 | Lung cancer | Simonato         | 2001 | Pooled case-control | Sweden, Germany, United Kingdom, France, Spain, Italy | 1 | 0 | 0 | 1 | 0 | 0 |
| 357757 | Lung cancer | Risch            | 1993 | Case-control        | Canada                                                | 1 | 1 | 0 | 1 | 0 | 1 |
| 357765 | Lung cancer | Sankaranarayanan | 1994 | Case-control        | India                                                 | 1 | 1 | 1 | 1 | 0 | 1 |
| 357792 | Lung cancer | Band             | 1999 | Nested case-control | Canada                                                | 1 | 1 | 0 | 1 | 0 | 1 |
| 357961 | Lung cancer | Becher           | 1991 | Case-control        | Germany                                               | 1 | 1 | 0 | 1 | 0 | 1 |

|        |             |                  |      |                     |                      |   |   |   |   |   |   |
|--------|-------------|------------------|------|---------------------|----------------------|---|---|---|---|---|---|
| 358161 | Lung cancer | Brockmoller      | 1993 | Case-control        | Germany              | 1 | 1 | 1 | 1 | 0 | 1 |
| 358213 | Lung cancer | Vena             | 1985 | Case-control        | United States        | 1 | 1 | 0 | 1 | 0 | 1 |
| 358338 | Lung cancer | Cascorbi         | 1996 | Case-control        | Germany              | 1 | 1 | 0 | 1 | 0 | 1 |
| 358479 | Lung cancer | Chiazze          | 1992 | Nested case-control | United States        | 1 | 1 | 1 | 1 | 0 | 1 |
| 358502 | Lung cancer | Ando             | 2003 | Prospective cohort  | Japan                | 1 | 1 | 0 | 1 | 0 | 0 |
| 358552 | Lung cancer | De Matteis       | 2012 | Case-control        | Italy                | 1 | 0 | 0 | 1 | 0 | 1 |
| 358558 | Lung cancer | He               | 2013 | Prospective cohort  | China                | 0 | 0 | 0 | 0 | 1 | 1 |
| 358563 | Lung cancer | Nishino          | 2004 | Prospective cohort  | Japan                | 0 | 0 | 0 | 1 | 0 | 1 |
| 358565 | Lung cancer | Papadopoulo<br>s | 2011 | Case-control        | France               | 0 | 0 | 0 | 1 | 0 | 1 |
| 358577 | Lung cancer | Shimazu          | 2008 | Prospective cohort  | Japan                | 0 | 0 | 0 | 1 | 0 | 1 |
| 358597 | Lung cancer | Tindle           | 2018 | Prospective cohort  | United States        | 1 | 1 | 1 | 1 | 0 | 1 |
| 358717 | Lung cancer | Yong             | 1997 | Prospective cohort  | United States        | 1 | 1 | 1 | 1 | 0 | 0 |
| 358794 | Lung cancer | Hansen           | 2017 | Prospective cohort  | Norway               | 1 | 0 | 0 | 1 | 0 | 0 |
| 359451 | Lung cancer | Boffetta         | 2010 | Pooled case-control | United States        | 1 | 0 | 0 | 1 | 0 | 1 |
| 413177 | Lung cancer | Yun              | 2015 | Prospective cohort  | Republic of<br>Korea | 0 | 0 | 0 | 1 | 0 | 1 |
| 419667 | Lung cancer | Suzuki           | 1994 | Case-control        | Brazil               | 1 | 1 | 1 | 1 | 0 | 1 |
| 419669 | Lung cancer | De Stefani       | 1996 | Case-control        | Uruguay              | 0 | 0 | 0 | 1 | 0 | 1 |
| 419671 | Lung cancer | Hu               | 1997 | Case-control        | China                | 1 | 0 | 0 | 1 | 0 | 1 |
| 419675 | Lung cancer | Kreuzer          | 1998 | Case-control        | Germany              | 1 | 0 | 0 | 1 | 1 | 1 |
| 419675 | Lung cancer | Kreuzer          | 1998 | Case-control        | Germany              | 1 | 0 | 0 | 1 | 0 | 1 |
| 419696 | Lung cancer | Armadans         | 1999 | Case-control        | Spain                | 1 | 1 | 0 | 1 | 0 | 1 |
| 419717 | Lung cancer | Kubik            | 2002 | Case-control        | Czechia              | 1 | 0 | 0 | 1 | 0 | 1 |
| 419728 | Lung cancer | Rachtan          | 2001 | Case-control        | Poland               | 1 | 1 | 0 | 1 | 0 | 1 |
| 426275 | Lung cancer | Thun             | 2013 | Prospective cohort  | United States        | 1 | 0 | 0 | 1 | 0 | 1 |
| 426275 | Lung cancer | Thun             | 2013 | Prospective cohort  | United States        | 1 | 0 | 0 | 1 | 0 | 0 |
| 450624 | Lung cancer | Zatloukal        | 2003 | case-control        | Czech<br>Republic    | 1 | 1 | 0 | 1 | 0 | 1 |
| 499241 | Lung cancer | Hansen           | 2021 | Prospective Cohort  | Norway               | 1 | 0 | 0 | 0 | 0 | 0 |
| 502075 | Lung cancer | Zhang            | 2022 | Prospective Cohort  | United<br>Kingdom    | 0 | 0 | 0 | 1 | 0 | 0 |
| 502124 | Lung cancer | Weber            | 2021 | Prospective Cohort  | Australia            | 0 | 0 | 0 | 1 | 0 | 0 |
| 502126 | Lung cancer | Guo              | 2022 | Prospective Cohort  | China                | 1 | 1 | 1 | 1 | 0 | 0 |
| 502130 | Lung cancer | Mezzoiuso        | 2021 | Prospective Cohort  | Italy                | 1 | 0 | 0 | 1 | 0 | 0 |
| 502143 | Lung cancer | Hawrysz          | 2020 | case-control        | Poland               | 1 | 1 | 0 | 1 | 0 | 0 |

|        |                       |                     |      |                     |                   |   |   |   |   |   |   |
|--------|-----------------------|---------------------|------|---------------------|-------------------|---|---|---|---|---|---|
| 502147 | Lung cancer           | Huang               | 2021 | case-control        | Taiwan, China     | 1 | 1 | 0 | 1 | 0 | 0 |
| 502184 | Lung cancer           | Viner               | 2019 | Prospective Cohort  | Canada            | 0 | 0 | 0 | 1 | 0 | 1 |
| 502190 | Lung cancer           | Park                | 2021 | Prospective Cohort  | Republic of Korea | 0 | 0 | 0 | 1 | 0 | 0 |
| 502192 | Lung cancer           | Jia                 | 2021 | Prospective Cohort  | United Kingdom    | 1 | 1 | 1 | 1 | 0 | 0 |
| 502202 | Lung cancer           | Rusmaully           | 2021 | case-control        | France            | 1 | 0 | 0 | 1 | 0 | 0 |
| 502208 | Lung cancer           | Jin                 | 2019 | case-control        | China             | 1 | 1 | 1 | 1 | 0 | 1 |
| 502213 | Lung cancer           | Tse                 | 2022 | case-control        | China             | 1 | 1 | 1 | 1 | 0 | 1 |
| 502215 | Lung cancer           | Huang               | 2022 | case-control        | Taiwan, China     | 1 | 0 | 0 | 1 | 0 | 1 |
| 502234 | Lung cancer           | Hosseini            | 2009 | case-control        | Iran              | 0 | 0 | 0 | 1 | 0 | 1 |
| 502241 | Lung cancer           | Naghbizadeh -Tahami | 2010 | case-control        | Iran              | 1 | 0 | 0 | 1 | 0 | 1 |
| 502246 | Lung cancer           | Shimatani           | 2020 | case-control        | Japan             | 1 | 1 | 1 | 1 | 0 | 1 |
| 502252 | Lung cancer           | Lai                 | 2019 | case-control        | Taiwan, China     | 1 | 0 | 0 | 1 | 0 | 1 |
| 502407 | Lung cancer           | Schwartz            | 2015 | case-control        | Brazil            | 1 | 1 | 1 | 1 | 0 | 1 |
| 502407 | Lung cancer           | Schwartz            | 2015 | case-control        | Brazil            | 1 | 1 | 1 | 1 | 0 | 0 |
| 502421 | Lung cancer           | Kreuzer             | 2003 | case-control        | Germany           | 1 | 1 | 1 | 1 | 0 | 1 |
| 502433 | Lung cancer           | Sreeja              | 2005 | case-control        | India             | 1 | 1 | 0 | 1 | 0 | 0 |
| 502458 | Lung cancer           | Siemiatycki         | 1994 | case-control        | Quebec, Canada    | 1 | 1 | 1 | 1 | 0 | 0 |
| 502460 | Lung cancer           | Chan-Yeung          | 2003 | case-control        | China             | 1 | 1 | 1 | 1 | 0 | 1 |
| 502482 | Lung cancer           | Lawania             | 2017 | case-control        | India             | 1 | 1 | 1 | 1 | 1 | 1 |
| 261355 | Macular degeneration  | Christen            | 1996 | Prospective cohort  | United States     | 0 | 0 | 0 | 1 | 0 | 1 |
| 359130 | Macular degeneration  | Seddon              | 1996 | Prospective cohort  | United States     | 0 | 0 | 0 | 1 | 0 | 1 |
| 221241 | Multiple sclerosis    | Asadollahi          | 2013 | Case-control        | Iran              | 0 | 0 | 0 | 1 | 0 | 0 |
| 348023 | Multiple sclerosis    | Hedstrom            | 2013 | Pooled case-control | Sweden            | 0 | 0 | 0 | 1 | 0 | 1 |
| 350715 | Multiple sclerosis    | Thorogood           | 1998 | Prospective cohort  | United Kingdom    | 1 | 1 | 1 | 1 | 1 | 1 |
| 350717 | Multiple sclerosis    | Villard-Mackintosh  | 1993 | Prospective cohort  | United Kingdom    | 1 | 0 | 0 | 1 | 0 | 1 |
| 369019 | Multiple sclerosis    | Ghadirian           | 2001 | Case-control        | Canada            | 1 | 0 | 0 | 1 | 0 | 1 |
| 369022 | Multiple sclerosis    | Jafari              | 2009 | Case-control        | Netherlands       | 1 | 1 | 0 | 1 | 0 | 1 |
| 328266 | Nasopharyngeal cancer | Liaw                | 1998 | Prospective cohort  | Taiwan            | 1 | 0 | 0 | 0 | 0 | 1 |
| 328921 | Nasopharyngeal cancer | Lin                 | 2015 | Prospective cohort  | China             | 0 | 0 | 0 | 1 | 0 | 1 |
| 328952 | Nasopharyngeal cancer | Hsu                 | 2009 | Prospective cohort  | Taiwan            | 1 | 1 | 1 | 1 | 0 | 0 |
| 346030 | Nasopharyngeal cancer | Nam                 | 1992 | Case-control        | United States     | 1 | 1 | 1 | 1 | 0 | 1 |

|        |                       |            |      |                     |                                                                                                                                                                                   |   |   |   |   |   |   |
|--------|-----------------------|------------|------|---------------------|-----------------------------------------------------------------------------------------------------------------------------------------------------------------------------------|---|---|---|---|---|---|
| 346032 | Nasopharyngeal cancer | Vaughan    | 1996 | Case-control        | United States                                                                                                                                                                     | 1 | 0 | 0 | 1 | 0 | 1 |
| 346040 | Nasopharyngeal cancer | Zhu        | 1995 | Case-control        | United States                                                                                                                                                                     | 0 | 0 | 0 | 1 | 0 | 1 |
| 346047 | Nasopharyngeal cancer | Cheng      | 1999 | Case-control        | Taiwan                                                                                                                                                                            | 0 | 0 | 0 | 1 | 0 | 1 |
| 346049 | Nasopharyngeal cancer | Yuan       | 2000 | Case-control        | China                                                                                                                                                                             | 0 | 0 | 0 | 1 | 0 | 1 |
| 346056 | Nasopharyngeal cancer | Ji         | 2011 | Case-control        | China                                                                                                                                                                             | 1 | 0 | 0 | 1 | 0 | 1 |
| 346071 | Nasopharyngeal cancer | Fachiroh   | 2012 | Case-control        | Thailand                                                                                                                                                                          | 1 | 0 | 0 | 1 | 0 | 1 |
| 373803 | Nasopharyngeal cancer | Chang      | 2017 | Case-control        | China                                                                                                                                                                             | 0 | 0 | 0 | 1 | 0 | 1 |
| 502223 | Nasopharyngeal cancer | Hsu        | 2020 | Case-control        | Taiwan                                                                                                                                                                            | 1 | 0 | 0 | 1 | 0 | 1 |
| 343375 | Other pharynx cancer  | Schlecht   | 1999 | Case-control        | Brazil                                                                                                                                                                            | 0 | 0 | 0 | 0 | 0 | 0 |
| 343434 | Other pharynx cancer  | Zavras     | 2001 | Case-control        | Greece                                                                                                                                                                            | 1 | 0 | 0 | 1 | 0 | 1 |
| 343450 | Other pharynx cancer  | De Stefani | 1998 | Case-control        | Uruguay                                                                                                                                                                           | 0 | 0 | 0 | 1 | 0 | 1 |
| 359128 | Other pharynx cancer  | Lu         | 2018 | Prospective cohort  | Japan                                                                                                                                                                             | 1 | 0 | 0 | 1 | 0 | 0 |
| 364113 | Other pharynx cancer  | Lubin      | 2010 | Pooled case-control | Italy, Switzerland, Slovakia, Romania, Hungary, Poland, Russia, United States, Puerto Rico, Argentina, Cuba, Brazil, Spain, Ireland, Canada, Australia, India, Sudan, South Sudan | 0 | 0 | 0 | 1 | 0 | 1 |
| 439809 | Other pharynx cancer  | Zeng       | 2019 | Case-control        | China                                                                                                                                                                             | 1 | 1 | 1 | 1 | 0 | 1 |
| 439813 | Other pharynx cancer  | Yamashita  | 2019 | Case-control        | Japan                                                                                                                                                                             | 1 | 1 | 1 | 1 | 0 | 1 |
| 502194 | Other pharynx cancer  | Shewale    | 2021 | Case-control        | United States                                                                                                                                                                     | 1 | 1 | 1 | 1 | 0 | 0 |
| 164536 | Pancreatic cancer     | Larsson    | 2005 | Prospective cohort  | Sweden                                                                                                                                                                            | 0 | 0 | 0 | 1 | 0 | 0 |
| 164547 | Pancreatic cancer     | Luo        | 2007 | Prospective cohort  | Japan                                                                                                                                                                             | 0 | 0 | 0 | 1 | 0 | 0 |
| 346137 | Pancreatic cancer     | Inoue      | 2003 | Nested case-control | Japan                                                                                                                                                                             | 0 | 0 | 0 | 1 | 0 | 1 |
| 346826 | Pancreatic cancer     | Fuchs      | 1996 | Prospective cohort  | United States                                                                                                                                                                     | 1 | 0 | 0 | 0 | 0 | 1 |
| 346828 | Pancreatic cancer     | Harnack    | 1997 | Prospective cohort  | United States                                                                                                                                                                     | 1 | 1 | 0 | 1 | 1 | 1 |
| 346832 | Pancreatic cancer     | Nilson     | 2000 | Prospective cohort  | Norway                                                                                                                                                                            | 1 | 1 | 0 | 1 | 0 | 0 |
| 346870 | Pancreatic cancer     | Ji         | 1995 | Case-control        | China                                                                                                                                                                             | 1 | 0 | 0 | 1 | 0 | 1 |
| 346876 | Pancreatic cancer     | Lin        | 2002 | Prospective cohort  | Japan                                                                                                                                                                             | 1 | 0 | 0 | 1 | 0 | 0 |

|        |                     |                          |      |                           |                                                                                             |   |   |   |   |   |   |
|--------|---------------------|--------------------------|------|---------------------------|---------------------------------------------------------------------------------------------|---|---|---|---|---|---|
| 347176 | Pancreatic cancer   | Silverman                | 1994 | Case-control              | United States                                                                               | 0 | 0 | 0 | 1 | 0 | 1 |
| 359135 | Pancreatic cancer   | Lin                      | 2013 | Prospective cohort        | Japan                                                                                       | 1 | 0 | 0 | 1 | 0 | 0 |
| 359138 | Pancreatic cancer   | Vrieling                 | 2010 | Prospective cohort        | Denmark, France, Germany, Greece, Italy, Netherlands, Norway, Spain, Sweden, United Kingdom | 0 | 0 | 0 | 1 | 0 | 0 |
| 359139 | Pancreatic cancer   | Lee                      | 1996 | Case-control              | Taiwan                                                                                      | 1 | 1 | 0 | 1 | 0 | 1 |
| 359140 | Pancreatic cancer   | Kuzmickiene              | 2013 | Prospective cohort        | Lithuania                                                                                   | 1 | 0 | 0 | 1 | 0 | 0 |
| 502128 | Pancreatic cancer   | Ahmad Naghibzadeh-Tahami | 2021 | case-control              | Iran                                                                                        | 0 | 0 | 0 | 1 | 0 | 1 |
| 502130 | Pancreatic cancer   | Angelo Gjosuè Mezzoioiso | 2021 | Prospective cohort        | Italy                                                                                       | 1 | 0 | 0 | 1 | 0 | 0 |
| 502188 | Pancreatic cancer   | Esther Molina-Montes     | 2020 | case-control              | Europe                                                                                      | 1 | 0 | 0 | 1 | 0 | 1 |
| 502220 | Pancreatic cancer   | Brian Z Huang            | 2019 | Prospective cohort        | United States                                                                               | 0 | 0 | 0 | 1 | 0 | 0 |
| 502474 | Pancreatic cancer   | Yuriko N Koyanagi        | 2019 | Prospective cohort        | Japan                                                                                       | 1 | 0 | 0 | 1 | 0 | 1 |
| 502474 | Pancreatic cancer   | Yuriko N Koyanagi        | 2019 | Prospective cohort        | Japan                                                                                       | 0 | 0 | 0 | 1 | 0 | 1 |
| 173863 | Parkinson's disease | Doll                     | 1994 | Prospective cohort        | United Kingdom                                                                              | 1 | 0 | 0 | 0 | 0 | 1 |
| 355955 | Parkinson's disease | Doll                     | 1980 | Prospective cohort        | United Kingdom                                                                              | 1 | 1 | 0 | 0 | 0 | 1 |
| 359151 | Parkinson's disease | Benedetti                | 2000 | Case-control              | United States                                                                               | 1 | 1 | 1 | 1 | 0 | 0 |
| 359152 | Parkinson's disease | Hernan                   | 2001 | Pooled prospective cohort | United States                                                                               | 1 | 1 | 1 | 0 | 0 | 1 |
| 359154 | Parkinson's disease | Van der Mark             | 2014 | Case-control              | Netherlands                                                                                 | 1 | 1 | 1 | 1 | 0 | 0 |
| 359157 | Parkinson's disease | Chen                     | 2010 | Case-control              | United States                                                                               | 1 | 0 | 0 | 1 | 0 | 1 |
| 359158 | Parkinson's disease | Driver                   | 2009 | Prospective cohort        | United States                                                                               | 1 | 1 | 1 | 1 | 0 | 0 |
| 359159 | Parkinson's disease | Thacker                  | 2007 | Prospective cohort        | United States                                                                               | 1 | 1 | 0 | 1 | 1 | 0 |
| 359160 | Parkinson's disease | Paganini-Hill            | 2001 | Nested case-control       | United States                                                                               | 1 | 1 | 1 | 1 | 1 | 0 |
| 359161 | Parkinson's disease | Rajput                   | 1987 | Case-control              | United States                                                                               | 1 | 1 | 1 | 1 | 0 | 0 |
| 359162 | Parkinson's disease | Jimenez-Jimenez          | 1992 | Case-control              | Spain                                                                                       | 1 | 1 | 1 | 1 | 1 | 0 |
| 359164 | Parkinson's disease | Morano                   | 1994 | Case-control              | Spain                                                                                       | 1 | 1 | 1 | 1 | 1 | 0 |
| 359307 | Parkinson's disease | Sasco                    | 1990 | Nested case-control       | United States                                                                               | 1 | 1 | 1 | 1 | 1 | 0 |
| 502009 | Parkinson's disease | Gallo                    | 2019 | Prospective cohort        | Sweden, United Kingdom, Germany,                                                            | 1 | 0 | 0 | 1 | 1 | 0 |

|        |                           |             |      |                     |                         |   |   |   |   |   |   |
|--------|---------------------------|-------------|------|---------------------|-------------------------|---|---|---|---|---|---|
|        |                           |             |      |                     | Spain, Italy,<br>Greece |   |   |   |   |   |   |
| 262563 | Peptic ulcer              | Anda        | 1990 | Prospective cohort  | United States           | 0 | 0 | 0 | 1 | 0 | 0 |
| 328259 | Peptic ulcer              | Nilsson     | 2001 | Prospective cohort  | Sweden                  | 1 | 1 | 0 | 1 | 0 | 0 |
| 338384 | Peptic ulcer              | Rosenstock  | 2003 | Prospective cohort  | Denmark                 | 0 | 0 | 0 | 1 | 0 | 0 |
| 349377 | Peptic ulcer              | Wang        | 1996 | Case-control        | China                   | 1 | 0 | 0 | 1 | 0 | 1 |
| 349381 | Peptic ulcer              | Aldoori     | 1997 | Prospective cohort  | United States           | 0 | 0 | 0 | 1 | 0 | 1 |
| 349542 | Peptic ulcer              | Al-Zubeer   | 2012 | Case-control        | Iraq                    | 1 | 1 | 1 | 1 | 0 | 1 |
| 359166 | Peptic ulcer              | Deding      | 2016 | Prospective cohort  | Denmark                 | 0 | 0 | 0 | 1 | 0 | 0 |
| 350659 | Peripheral artery disease | Conen       | 2011 | Prospective cohort  | United States           | 0 | 0 | 0 | 1 | 0 | 1 |
| 359221 | Peripheral artery disease | St-Pierre   | 2010 | Prospective cohort  | Canada                  | 0 | 0 | 0 | 1 | 0 | 0 |
| 359223 | Peripheral artery disease | Lakshmanan  | 2010 | Prospective cohort  | Australia               | 1 | 0 | 0 | 1 | 1 | 0 |
| 369290 | Peripheral artery disease | Skalkidis   | 1989 | Case-control        | Greece                  | 0 | 0 | 0 | 1 | 0 | 1 |
| 462792 | Peripheral artery disease | Banks       | 2019 | Cohort              | Australia               | 0 | 0 | 0 | 1 | 0 | 0 |
| 501896 | Peripheral artery disease | Ding        | 2019 | Cohort              | United States           | 0 | 0 | 0 | 1 | 0 | 0 |
| 261500 | Rheumatoid Arthritis      | Costenbader | 2006 | Prospective cohort  | United States           | 0 | 0 | 0 | 1 | 0 | 1 |
| 261510 | Rheumatoid Arthritis      | Heliovaara  | 1993 | Prospective cohort  | Finland                 | 1 | 1 | 0 | 1 | 0 | 1 |
| 350653 | Rheumatoid Arthritis      | Di Giuseppe | 2013 | Prospective cohort  | Sweden                  | 1 | 1 | 1 | 1 | 1 | 1 |
| 353080 | Rheumatoid Arthritis      | Fisher      | 2015 | Nested case-control | Spain, Italy            | 1 | 1 | 1 | 1 | 0 | 1 |
| 502082 | Rheumatoid Arthritis      | Jinma Ren   | 2020 | case-control        | United States           | 1 | 1 | 1 | 1 | 0 | 0 |
| 502084 | Rheumatoid Arthritis      | Xinyi Liu   | 2019 | Prospective Cohort  | United States           | 0 | 0 | 0 | 0 | 1 | 0 |
| 309835 | Stomach cancer            | Gammon      | 1997 | Case-control        | United States           | 0 | 0 | 0 | 0 | 0 | 0 |
| 328266 | Stomach cancer            | Liaw        | 1998 | Prospective cohort  | Taiwan                  | 1 | 0 | 0 | 0 | 0 | 0 |
| 339695 | Stomach cancer            | Kneller     | 1991 | Prospective cohort  | United States           | 1 | 1 | 0 | 1 | 0 | 1 |
| 339697 | Stomach cancer            | Ji          | 1996 | Case-control        | China                   | 1 | 0 | 0 | 1 | 0 | 0 |
| 340513 | Stomach cancer            | De Stefani  | 1998 | Case-control        | Uruguay                 | 0 | 0 | 0 | 1 | 0 | 1 |
| 340528 | Stomach cancer            | Zaridze     | 2000 | Case-control        | Russia                  | 1 | 0 | 0 | 1 | 0 | 1 |
| 340554 | Stomach cancer            | Hoshiyama   | 1992 | Case-control        | Japan                   | 1 | 0 | 0 | 1 | 0 | 1 |
| 340578 | Stomach cancer            | Guo         | 1994 | Nested case-control | China                   | 1 | 0 | 0 | 1 | 0 | 1 |
| 340582 | Stomach cancer            | Chao        | 2002 | Prospective cohort  | United States           | 1 | 1 | 0 | 1 | 0 | 0 |
| 340582 | Stomach cancer            | Chao        | 2002 | Prospective cohort  | United States           | 0 | 0 | 0 | 1 | 0 | 0 |
| 343580 | Stomach cancer            | Siemiatycki | 1995 | Case-control        | Canada                  | 1 | 1 | 1 | 1 | 0 | 0 |
| 347810 | Stomach cancer            | Fujino      | 2005 | Prospective cohort  | Japan                   | 1 | 1 | 0 | 1 | 0 | 0 |

|        |                |            |      |                           |                                                                            |   |   |   |   |   |   |
|--------|----------------|------------|------|---------------------------|----------------------------------------------------------------------------|---|---|---|---|---|---|
| 347810 | Stomach cancer | Fujino     | 2005 | Prospective cohort        | Japan                                                                      | 0 | 0 | 0 | 1 | 0 | 0 |
| 502130 | Stomach cancer | Mezzoiuso  | 2021 | Prospective cohort        | Italy                                                                      | 1 | 0 | 0 | 1 | 0 | 0 |
| 502141 | Stomach cancer | Zhang      | 2021 | Case-control              | China                                                                      | 1 | 1 | 0 | 1 | 0 | 0 |
| 122237 | Stroke         | Okada      | 1976 | Prospective cohort        | Japan                                                                      | 1 | 1 | 1 | 1 | 0 | 1 |
| 155207 | Stroke         | Chiuvè     | 2008 | Prospective cohort        | United States                                                              | 1 | 0 | 0 | 0 | 0 | 1 |
| 165539 | Stroke         | Jacobs     | 1999 | Prospective cohort        | United States, Finland, Netherlands, Italy, Croatia, Serbia, Greece, Japan | 1 | 0 | 0 | 1 | 0 | 1 |
| 174238 | Stroke         | Doll       | 2004 | Prospective cohort        | United Kingdom                                                             | 1 | 0 | 0 | 0 | 0 | 1 |
| 193978 | Stroke         | Yamada     | 2003 | Prospective cohort        | Japan                                                                      | 1 | 1 | 0 | 0 | 0 | 0 |
| 298316 | Stroke         | Longstreth | 1992 | Case-control              | United States                                                              | 1 | 0 | 0 | 1 | 0 | 1 |
| 324092 | Stroke         | Klatsky    | 2002 | Prospective cohort        | United States                                                              | 0 | 0 | 0 | 1 | 0 | 0 |
| 328259 | Stroke         | Nilsson    | 2001 | Prospective cohort        | Sweden                                                                     | 1 | 0 | 0 | 1 | 0 | 0 |
| 328460 | Stroke         | Kono       | 1985 | Prospective cohort        | Japan                                                                      | 1 | 1 | 0 | 1 | 0 | 1 |
| 330677 | Stroke         | Kelly      | 2008 | Prospective cohort        | China                                                                      | 0 | 0 | 0 | 1 | 0 | 0 |
| 330932 | Stroke         | Lam        | 2007 | Prospective cohort        | China                                                                      | 0 | 0 | 0 | 1 | 1 | 0 |
| 331371 | Stroke         | Iso        | 2005 | Prospective cohort        | Japan                                                                      | 0 | 0 | 0 | 1 | 0 | 0 |
| 331705 | Stroke         | Lawlor     | 2008 | Prospective cohort        | Republic of Korea                                                          | 0 | 0 | 0 | 1 | 0 | 1 |
| 331710 | Stroke         | Ueshima    | 2004 | Prospective cohort        | Japan                                                                      | 0 | 0 | 0 | 1 | 0 | 0 |
| 332100 | Stroke         | Mannami    | 2004 | Prospective cohort        | Japan                                                                      | 0 | 0 | 0 | 1 | 0 | 1 |
| 332100 | Stroke         | Mannami    | 2004 | Prospective cohort        | Japan                                                                      | 0 | 0 | 0 | 1 | 0 | 0 |
| 332104 | Stroke         | Shaper     | 2003 | Prospective cohort        | United Kingdom                                                             | 0 | 0 | 0 | 1 | 0 | 0 |
| 334028 | Stroke         | Kawachi    | 1993 | Prospective cohort        | United States                                                              | 0 | 0 | 0 | 0 | 0 | 1 |
| 334410 | Stroke         | Kuller     | 1991 | Prospective cohort        | United States                                                              | 1 | 1 | 0 | 1 | 0 | 0 |
| 334731 | Stroke         | Hart       | 1999 | Prospective cohort        | United Kingdom                                                             | 1 | 1 | 0 | 1 | 0 | 0 |
| 334814 | Stroke         | Kondo      | 2011 | Prospective cohort        | Japan                                                                      | 1 | 0 | 0 | 1 | 0 | 0 |
| 334967 | Stroke         | Fuller     | 1983 | Prospective cohort        | United Kingdom                                                             | 1 | 1 | 0 | 1 | 0 | 0 |
| 335266 | Stroke         | Molshatzki | 2013 | Prospective cohort        | Israel                                                                     | 1 | 1 | 0 | 1 | 0 | 0 |
| 335914 | Stroke         | Honjo      | 2009 | Pooled prospective cohort | Japan                                                                      | 1 | 0 | 0 | 1 | 0 | 0 |
| 336216 | Stroke         | Thun       | 2013 | Pooled prospective cohort | United States                                                              | 1 | 1 | 1 | 1 | 0 | 1 |
| 336216 | Stroke         | Thun       | 2013 | Pooled prospective cohort | United States                                                              | 1 | 0 | 0 | 1 | 0 | 0 |
| 336216 | Stroke         | Thun       | 2013 | Pooled prospective cohort | United States                                                              | 1 | 0 | 0 | 0 | 0 | 1 |

|        |        |               |      |                           |                        |   |   |   |   |   |   |
|--------|--------|---------------|------|---------------------------|------------------------|---|---|---|---|---|---|
| 336216 | Stroke | Thun          | 2013 | Pooled prospective cohort | United States          | 1 | 0 | 0 | 0 | 0 | 0 |
| 336319 | Stroke | Jamrozik      | 2018 | Pooled prospective cohort | Australia              | 0 | 0 | 0 | 1 | 1 | 0 |
| 336319 | Stroke | Jamrozik      | 2018 | Pooled prospective cohort | Australia              | 0 | 0 | 0 | 1 | 1 | 1 |
| 336801 | Stroke | Woodward      | 2005 | Pooled prospective cohort | Multi-country          | 1 | 1 | 1 | 1 | 0 | 1 |
| 343297 | Stroke | Shaper        | 1991 | Prospective cohort        | United Kingdom         | 1 | 1 | 0 | 1 | 0 | 0 |
| 343300 | Stroke | Anderson      | 2004 | Case-control              | Australia, New Zealand | 0 | 0 | 0 | 1 | 0 | 1 |
| 343306 | Stroke | Kenfield      | 2008 | Prospective cohort        | United States          | 1 | 1 | 0 | 1 | 0 | 1 |
| 343582 | Stroke | Lam           | 2001 | Case-control              | China                  | 1 | 0 | 0 | 1 | 1 | 0 |
| 343582 | Stroke | Lam           | 2001 | Case-control              | China                  | 1 | 0 | 0 | 1 | 0 | 0 |
| 343647 | Stroke | Doll          | 1976 | Prospective cohort        | United Kingdom         | 1 | 1 | 0 | 1 | 1 | 0 |
| 343647 | Stroke | Doll          | 1976 | Prospective cohort        | United Kingdom         | 1 | 1 | 0 | 1 | 0 | 0 |
| 344315 | Stroke | Bhat          | 2008 | Case-control              | United States          | 0 | 0 | 0 | 1 | 0 | 0 |
| 344318 | Stroke | Kurth         | 2003 | Prospective cohort        | United States          | 1 | 0 | 0 | 1 | 0 | 1 |
| 344318 | Stroke | Kurth         | 2003 | Prospective cohort        | United States          | 0 | 0 | 0 | 1 | 0 | 1 |
| 344340 | Stroke | Broderick     | 2003 | Case-control              | United States          | 1 | 0 | 0 | 1 | 0 | 1 |
| 344340 | Stroke | Broderick     | 2003 | Case-control              | United States          | 1 | 1 | 1 | 1 | 0 | 0 |
| 344343 | Stroke | Wang          | 2001 | Prospective cohort        | China                  | 1 | 1 | 1 | 1 | 1 | 1 |
| 344345 | Stroke | Prescott      | 1998 | Pooled prospective cohort | Denmark                | 1 | 0 | 0 | 1 | 0 | 0 |
| 344359 | Stroke | Colditz       | 1988 | Prospective cohort        | United States          | 0 | 0 | 0 | 1 | 0 | 0 |
| 344360 | Stroke | Wolf          | 1988 | Prospective cohort        | United States          | 1 | 0 | 0 | 1 | 0 | 0 |
| 344362 | Stroke | Ostfeld       | 1974 | Prospective cohort        | United States          | 1 | 1 | 1 | 1 | 1 | 1 |
| 350743 | Stroke | Bonita        | 1986 | Case-control              | New Zealand            | 1 | 1 | 0 | 1 | 0 | 1 |
| 350743 | Stroke | Bonita        | 1986 | Case-control              | New Zealand            | 1 | 1 | 0 | 1 | 0 | 0 |
| 350747 | Stroke | Yamaura       | 2001 | Case-control              | Japan                  | 1 | 1 | 1 | 1 | 0 | 0 |
| 350747 | Stroke | Yamaura       | 2001 | Case-control              | Japan                  | 1 | 1 | 1 | 1 | 0 | 1 |
| 350749 | Stroke | Kurth         | 2003 | Prospective cohort        | United States          | 1 | 0 | 0 | 0 | 0 | 1 |
| 350753 | Stroke | Lindbohm      | 2016 | Prospective cohort        | Finland                | 0 | 0 | 0 | 1 | 0 | 1 |
| 350757 | Stroke | Xu            | 2013 | Prospective cohort        | China                  | 0 | 0 | 0 | 1 | 1 | 0 |
| 356591 | Stroke | Hippisley-Cox | 2013 | Prospective cohort        | United Kingdom         | 0 | 0 | 0 | 1 | 0 | 1 |
| 357417 | Stroke | Bonita        | 1999 | Case-control              | New Zealand            | 1 | 1 | 0 | 1 | 0 | 0 |
| 357431 | Stroke | Gill          | 1989 | Case-control              | United Kingdom         | 0 | 0 | 0 | 1 | 0 | 1 |
| 357435 | Stroke | Hajat         | 2004 | Case-control              | United Kingdom         | 1 | 0 | 0 | 1 | 0 | 1 |



|        |              |           |      |                     |                   |   |   |   |   |   |   |
|--------|--------------|-----------|------|---------------------|-------------------|---|---|---|---|---|---|
| 357445 | Stroke       | Jamrozik  | 1994 | Case-control        | Australia         | 1 | 0 | 0 | 1 | 0 | 1 |
| 358462 | Stroke       | Thrift    | 1999 | Case-control        | Australia         | 0 | 0 | 0 | 1 | 0 | 1 |
| 358466 | Stroke       | Markidan  | 2018 | Case-control        | United States     | 0 | 0 | 0 | 1 | 0 | 0 |
| 358470 | Stroke       | Song      | 2005 | Case-control        | Republic of Korea | 1 | 1 | 1 | 1 | 0 | 0 |
| 358476 | Stroke       | Juvela    | 1993 | Case-control        | Finland           | 1 | 0 | 0 | 1 | 0 | 1 |
| 358506 | Stroke       | Bonita    | 1986 | Case-control        | New Zealand       | 1 | 1 | 1 | 1 | 0 | 0 |
| 358540 | Stroke       | Hannaford | 1994 | Nested case-control | United Kingdom    | 1 | 0 | 0 | 1 | 0 | 1 |
| 358652 | Stroke       | Carrieri  | 1994 | Case-control        | Italy             | 0 | 0 | 0 | 1 | 0 | 1 |
| 412060 | Stroke       | Ueshima   | 2004 | Prospective cohort  | Japan             | 0 | 0 | 0 | 1 | 0 | 0 |
| 429295 | Stroke       | Lu        | 2008 | Prospective cohort  | Sweden            | 0 | 0 | 0 | 1 | 0 | 0 |
| 432350 | Stroke       | Zhu       | 2019 | Prospective cohort  | China             | 0 | 0 | 0 | 1 | 0 | 0 |
| 501860 | Stroke       | Rautalin  | 2020 | Prospective cohort  | Finland           | 1 | 1 | 1 | 1 | 1 | 0 |
| 501896 | Stroke       | Ding      | 2019 | Prospective cohort  | United States     | 0 | 0 | 0 | 1 | 0 | 0 |
| 501942 | Stroke       | Sato      | 2021 | Prospective cohort  | Japan             | 0 | 0 | 0 | 1 | 1 | 0 |
| 501943 | Stroke       | Zhang     | 2021 | Prospective cohort  | United Kingdom    | 0 | 0 | 0 | 1 | 0 | 0 |
| 502077 | Stroke       | Jee       | 2019 | Prospective cohort  | Republic of Korea | 1 | 1 | 1 | 1 | 0 | 1 |
| 502248 | Stroke       | Peters    | 2020 | Prospective cohort  | United Kingdom    | 0 | 0 | 0 | 1 | 0 | 1 |
| 502250 | Stroke       | Oshunbade | 2020 | Prospective cohort  | United States     | 1 | 0 | 0 | 1 | 0 | 0 |
| 173863 | Tuberculosis | Doll      | 1994 | Prospective cohort  | United Kingdom    | 1 | 0 | 0 | 0 | 0 | 1 |
| 236195 | Tuberculosis | Liu       | 1998 | Case-control        | China             | 1 | 1 | 1 | 1 | 0 | 0 |
| 298335 | Tuberculosis | Crampin   | 2004 | Case-control        | Malawi            | 1 | 0 | 0 | 1 | 0 | 1 |
| 298340 | Tuberculosis | Buskin    | 1994 | Case-control        | United States     | 1 | 1 | 1 | 1 | 0 | 1 |
| 327906 | Tuberculosis | Wen       | 2010 | Prospective cohort  | Taiwan            | 0 | 0 | 0 | 1 | 0 | 1 |
| 327949 | Tuberculosis | Lin       | 2009 | Prospective cohort  | Taiwan            | 0 | 0 | 0 | 1 | 0 | 0 |
| 327956 | Tuberculosis | Jee       | 2009 | Prospective cohort  | Republic of Korea | 1 | 0 | 0 | 1 | 0 | 0 |
| 343383 | Tuberculosis | Anderson  | 1997 | Case-control        | United States     | 1 | 0 | 0 | 1 | 0 | 1 |
| 343582 | Tuberculosis | Lam       | 2001 | Case-control        | China             | 1 | 0 | 0 | 1 | 0 | 1 |
| 343582 | Tuberculosis | Lam       | 2001 | Case-control        | China             | 1 | 0 | 0 | 1 | 1 | 1 |
| 348044 | Tuberculosis | Ariyothai | 2004 | Case-control        | Thailand          | 1 | 1 | 1 | 1 | 0 | 1 |
| 348046 | Tuberculosis | Kolappan  | 2002 | Nested case-control | India             | 1 | 1 | 1 | 1 | 0 | 1 |
| 348053 | Tuberculosis | Leung     | 2004 | Prospective cohort  | China             | 0 | 0 | 0 | 1 | 1 | 1 |
| 359225 | Tuberculosis | Dhamgaye  | 2008 | Case-control        | India             | 1 | 1 | 0 | 1 | 0 | 1 |

|        |                 |            |      |                          |                                  |   |   |   |   |   |   |
|--------|-----------------|------------|------|--------------------------|----------------------------------|---|---|---|---|---|---|
| 359228 | Tuberculosis    | Marahatta  | 2015 | Case-control             | Nepal                            | 1 | 1 | 1 | 1 | 0 | 1 |
| 359230 | Tuberculosis    | Pednekar   | 2007 | Prospective cohort       | India                            | 1 | 0 | 0 | 1 | 0 | 0 |
| 359273 | Tuberculosis    | Smith      | 2015 | Nested case-control      | United States                    | 1 | 0 | 0 | 0 | 0 | 1 |
| 369826 | Tuberculosis    | Alavi      | 2012 | Case-control             | Iran                             | 0 | 0 | 0 | 1 | 1 | 1 |
| 501926 | Tuberculosis    | Li         | 2021 | Prospective cohort study | China                            | 0 | 0 | 0 | 0 | 0 | 1 |
| 501936 | Tuberculosis    | Tewatia    | 2020 | Case-control             | India                            | 1 | 1 | 0 | 1 | 0 | 1 |
| 230548 | Type 2 diabetes | Sawada     | 2003 | Prospective cohort       | Japan                            | 0 | 0 | 0 | 1 | 0 | 1 |
| 236197 | Type 2 diabetes | Pirie      | 2013 | Prospective cohort       | United Kingdom                   | 1 | 1 | 1 | 1 | 0 | 1 |
| 255434 | Type 2 diabetes | Doi        | 2012 | Prospective cohort       | Japan                            | 0 | 0 | 0 | 1 | 0 | 0 |
| 255463 | Type 2 diabetes | Waki       | 2005 | Prospective cohort       | Japan                            | 0 | 0 | 0 | 1 | 0 | 0 |
| 309584 | Type 2 diabetes | Teratini   | 2012 | Prospective cohort       | Japan                            | 0 | 0 | 0 | 1 | 0 | 1 |
| 309588 | Type 2 diabetes | Kawakami   | 1997 | Prospective cohort       | Japan                            | 0 | 0 | 0 | 1 | 0 | 1 |
| 309592 | Type 2 diabetes | Hu         | 2001 | Prospective cohort       | United States                    | 0 | 0 | 0 | 0 | 0 | 1 |
| 309610 | Type 2 diabetes | Jee        | 2010 | Prospective cohort       | Republic of Korea                | 0 | 0 | 0 | 1 | 0 | 1 |
| 348079 | Type 2 diabetes | Rimm       | 1995 | Prospective cohort       | United States                    | 0 | 0 | 0 | 1 | 0 | 1 |
| 348081 | Type 2 diabetes | Uchimoto   | 1999 | Prospective cohort       | Japan                            | 0 | 0 | 0 | 1 | 0 | 1 |
| 348083 | Type 2 diabetes | Manson     | 2000 | Prospective cohort       | United States                    | 0 | 0 | 0 | 1 | 0 | 1 |
| 348085 | Type 2 diabetes | Nakanishi  | 2000 | Prospective cohort       | Japan                            | 0 | 0 | 0 | 1 | 0 | 1 |
| 348088 | Type 2 diabetes | Wannamethe | 2001 | Prospective cohort       | England, United Kingdom          | 1 | 0 | 0 | 1 | 0 | 1 |
| 348091 | Type 2 diabetes | Carlsson   | 2004 | Prospective cohort       | Norway                           | 1 | 0 | 0 | 1 | 0 | 0 |
| 348100 | Type 2 diabetes | Sairenchi  | 2004 | Prospective cohort       | Japan                            | 0 | 0 | 0 | 1 | 0 | 0 |
| 348105 | Type 2 diabetes | Patja      | 2005 | Prospective cohort       | Finland                          | 0 | 0 | 0 | 1 | 0 | 0 |
| 348108 | Type 2 diabetes | Meisinger  | 2006 | Prospective cohort       | Germany                          | 0 | 0 | 0 | 1 | 0 | 0 |
| 348112 | Type 2 diabetes | Park       | 2008 | Retrospective cohort     | Republic of Korea                | 1 | 1 | 0 | 1 | 0 | 1 |
| 356075 | Type 2 diabetes | Will       | 2001 | Prospective cohort       | United States                    | 0 | 0 | 0 | 1 | 0 | 0 |
| 356095 | Type 2 diabetes | Akter      | 2015 | Prospective cohort       | Japan                            | 0 | 0 | 0 | 1 | 0 | 1 |
| 356097 | Type 2 diabetes | Hilawe     | 2015 | Prospective cohort       | Japan                            | 0 | 0 | 0 | 1 | 0 | 1 |
| 356099 | Type 2 diabetes | Hou        | 2016 | Case-control             | China                            | 0 | 0 | 0 | 1 | 0 | 0 |
| 356101 | Type 2 diabetes | Rasouli    | 2016 | Case-control             | Sweden                           | 1 | 0 | 0 | 1 | 0 | 1 |
| 356103 | Type 2 diabetes | Lv         | 2017 | Prospective cohort       | China                            | 0 | 0 | 0 | 1 | 0 | 0 |
| 356105 | Type 2 diabetes | Consortium | 2014 | Case-cohort              | Denmark, France, Germany, Italy, | 0 | 0 | 0 | 1 | 0 | 0 |

|        |                 |              |      |                    |                                                        |   |   |   |   |   |   |  |
|--------|-----------------|--------------|------|--------------------|--------------------------------------------------------|---|---|---|---|---|---|--|
|        |                 |              |      |                    | Netherlands,<br>Spain,<br>Sweden,<br>United<br>Kingdom |   |   |   |   |   |   |  |
| 413800 | Type 2 diabetes | Radzeviciene | 2018 | Case-control       | Lithuania                                              | 1 | 0 | 0 | 1 | 0 | 1 |  |
| 502053 | Type 2 diabetes | Huh          | 2022 | Prospective cohort | Republic of Korea                                      | 0 | 0 | 0 | 1 | 0 | 0 |  |
| 502177 | Type 2 diabetes | White        | 2018 | Prospective cohort | United States                                          | 0 | 0 | 0 | 1 | 0 | 0 |  |

## Section 4: The dose-response RR curves and their 95% uncertainty interval for all smoking-outcome pairs

### Section 4.1: Five-star smoking-outcome pairs

#### Laryngeal cancer

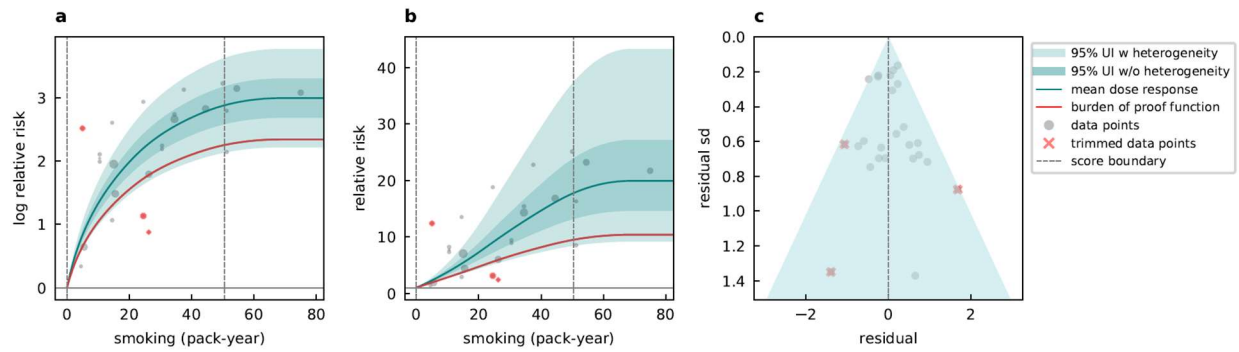

#### Aortic aneurysm (reference age group: 55-59)

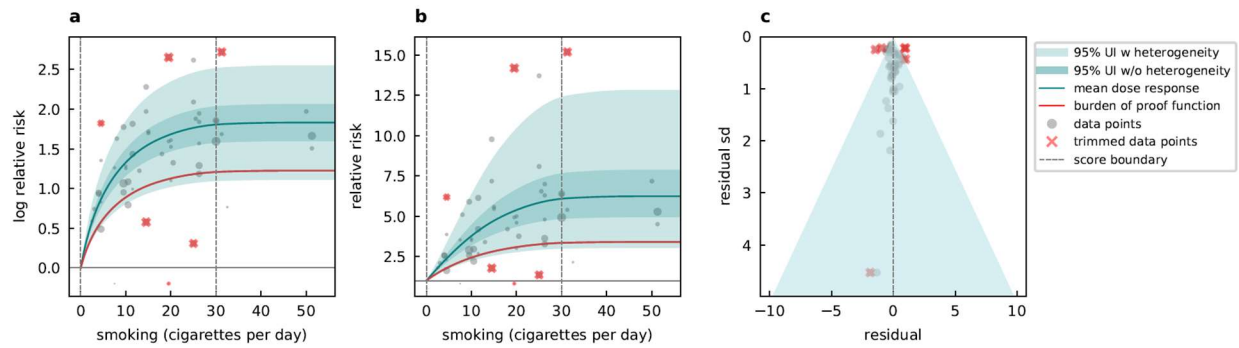

### Peripheral artery disease (reference age group: 60-64)

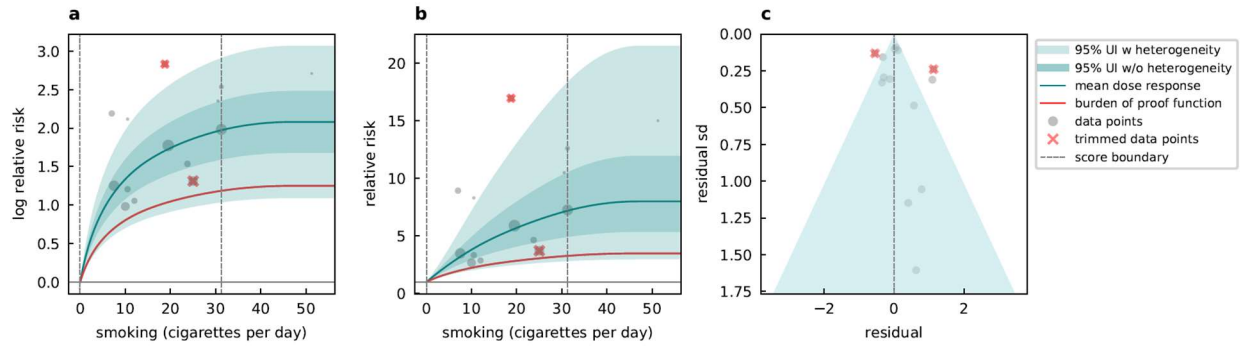

### Lung cancer

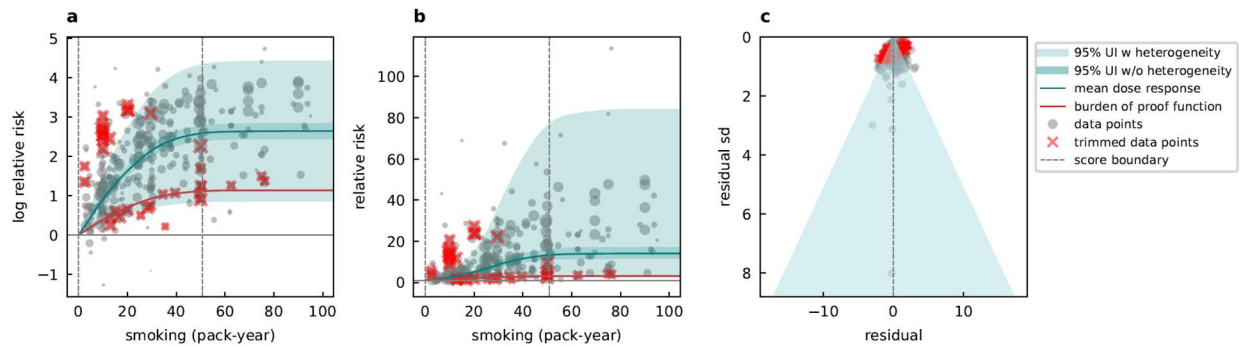

### Other pharynx cancer

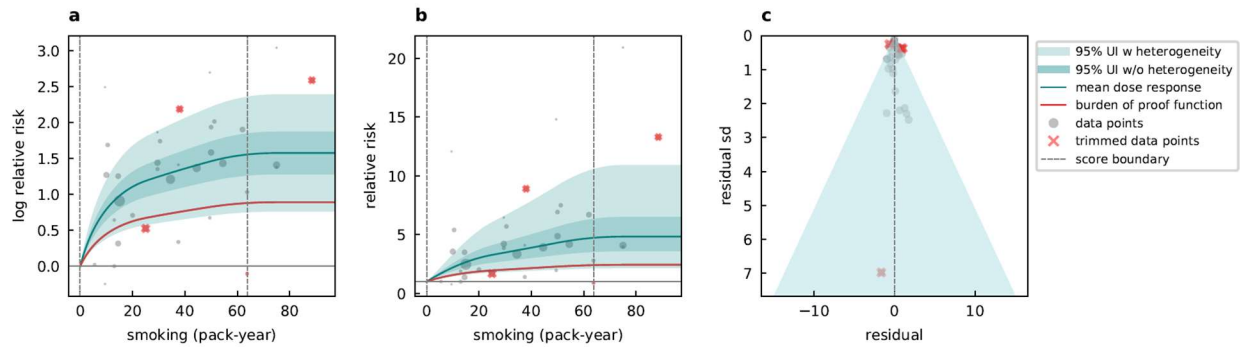

### Section 4.2: Four-star smoking-outcome pairs

#### Pancreatic cancer

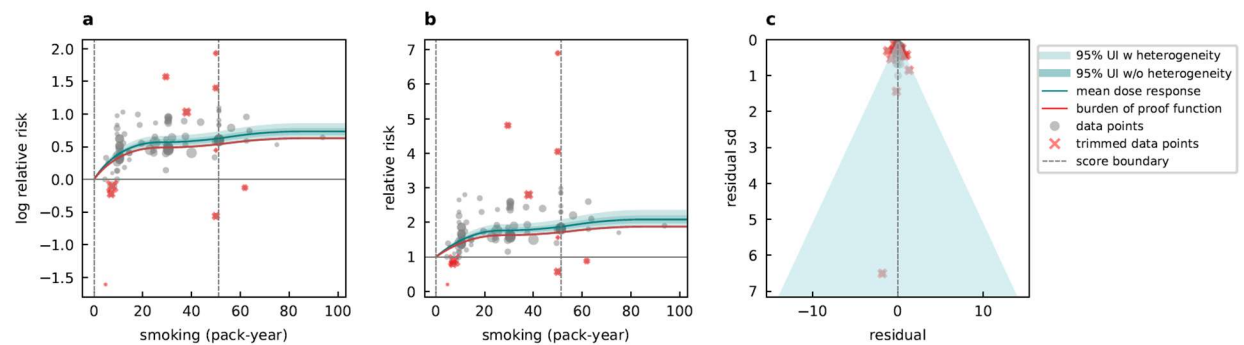

## COPD

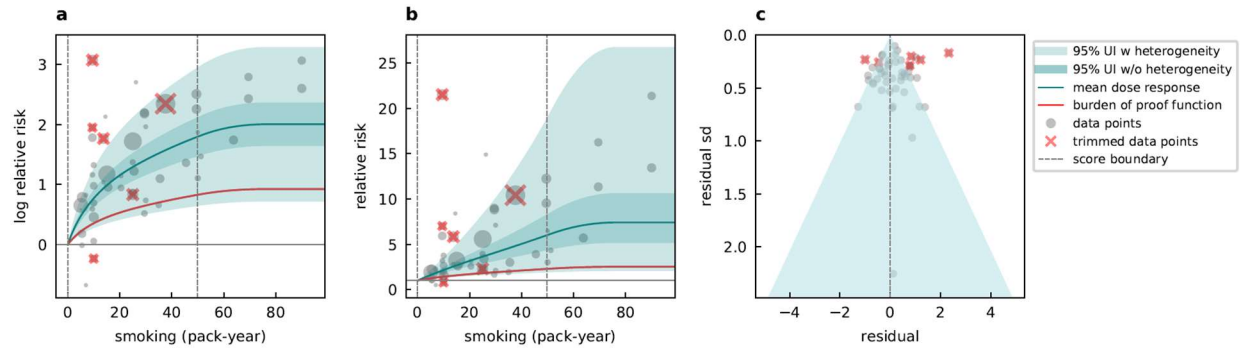

## Lower respiratory infection

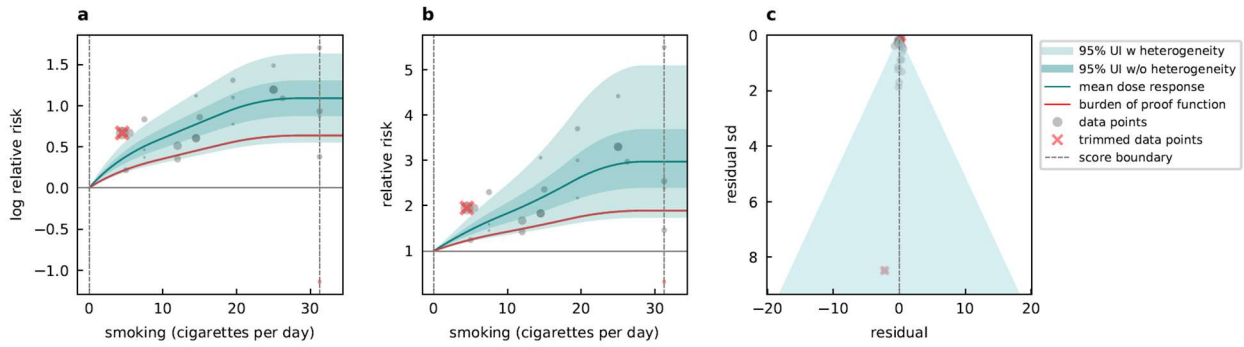

## Section 4.3: Three-star smoking-outcome pairs

### Bladder cancer

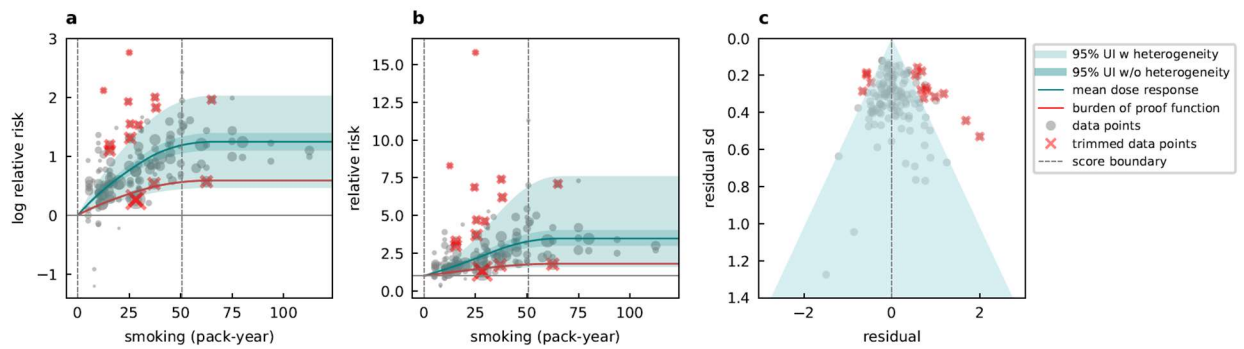

### Stomach cancer

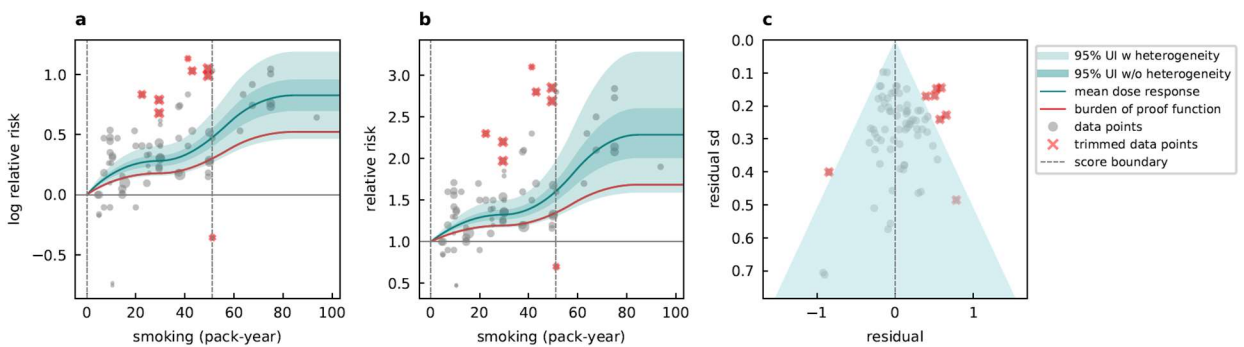

## Diabetes

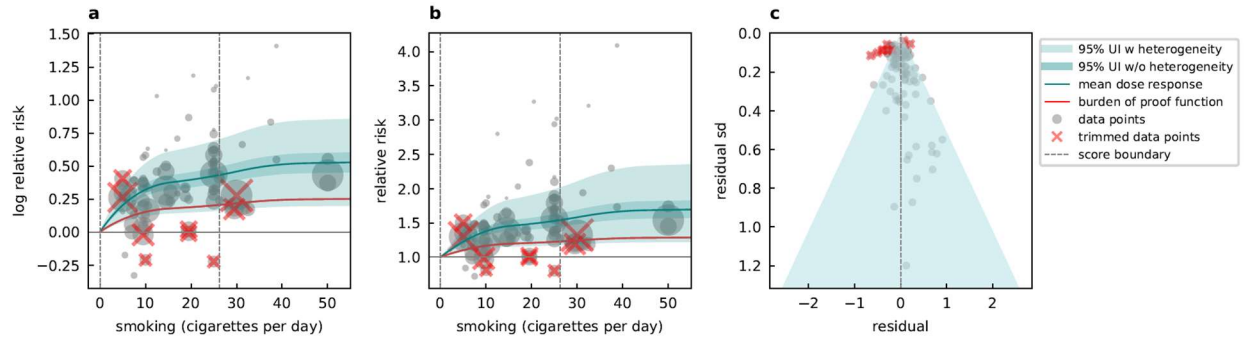

## Tuberculosis

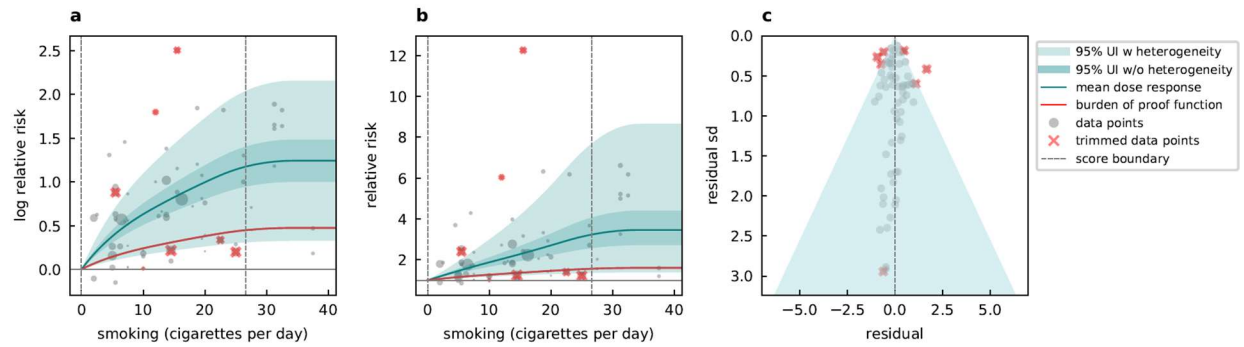

## Multiple sclerosis

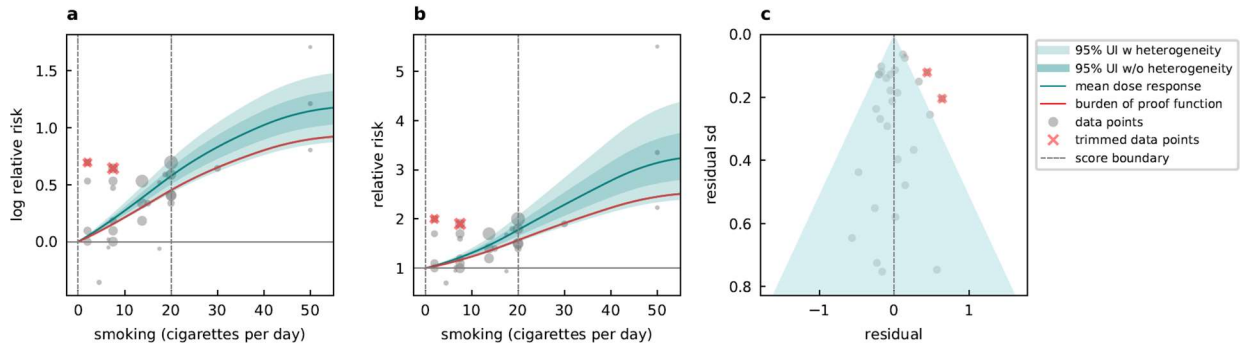

## Low back pain

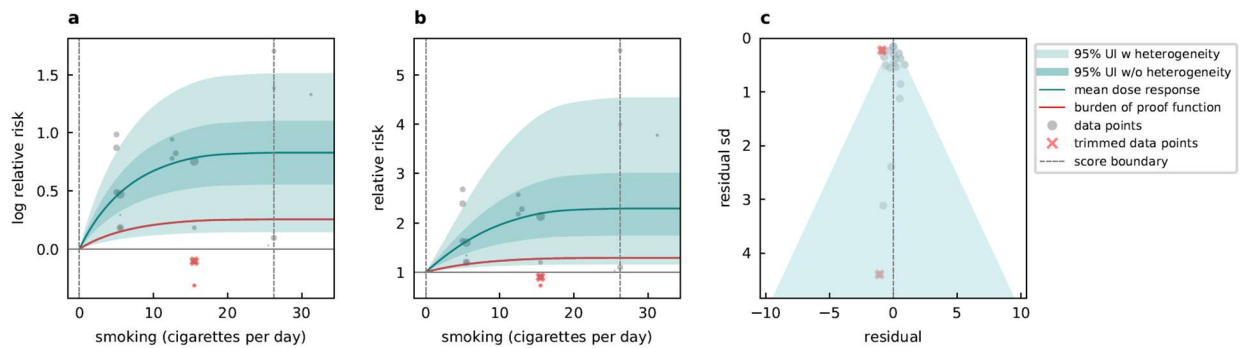

### Esophageal cancer

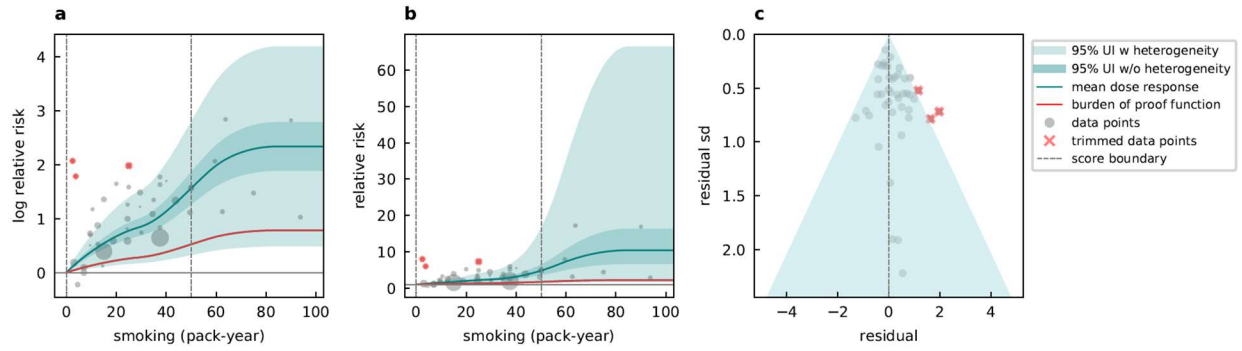

### Ischemic heart disease (reference age group: 55-59)

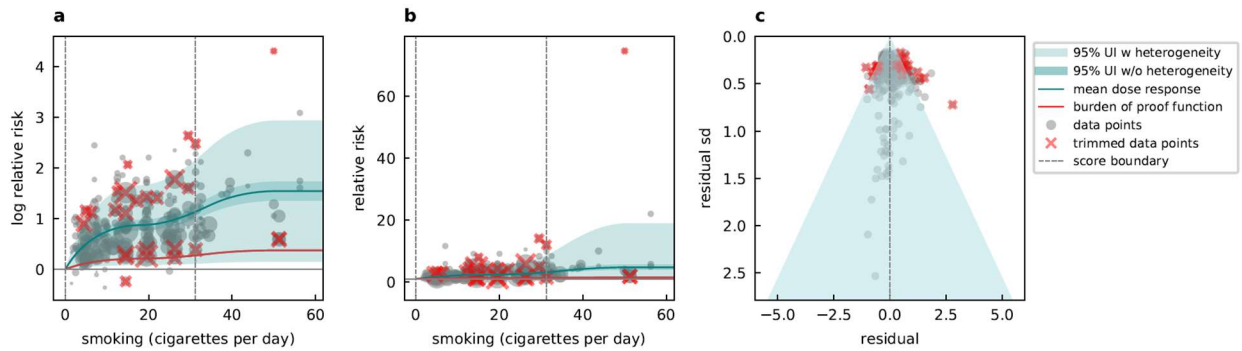

### Peptic ulcer disease

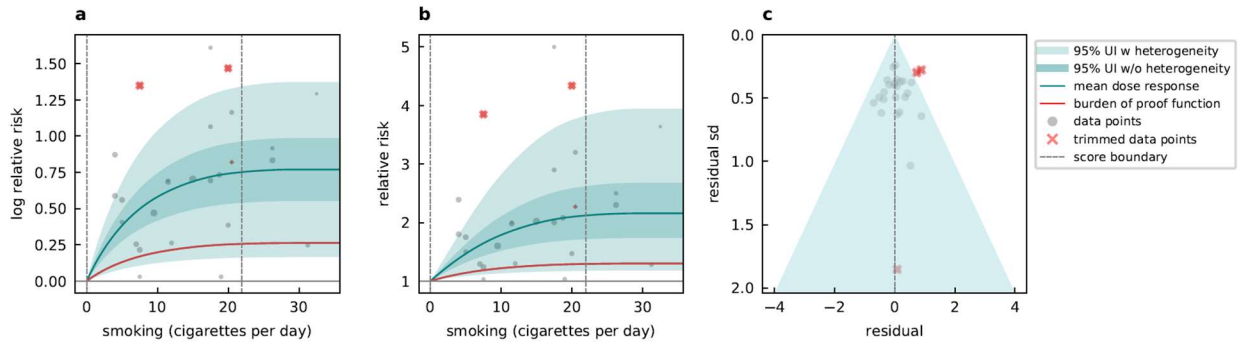

### Stroke (reference age group: 55-59)

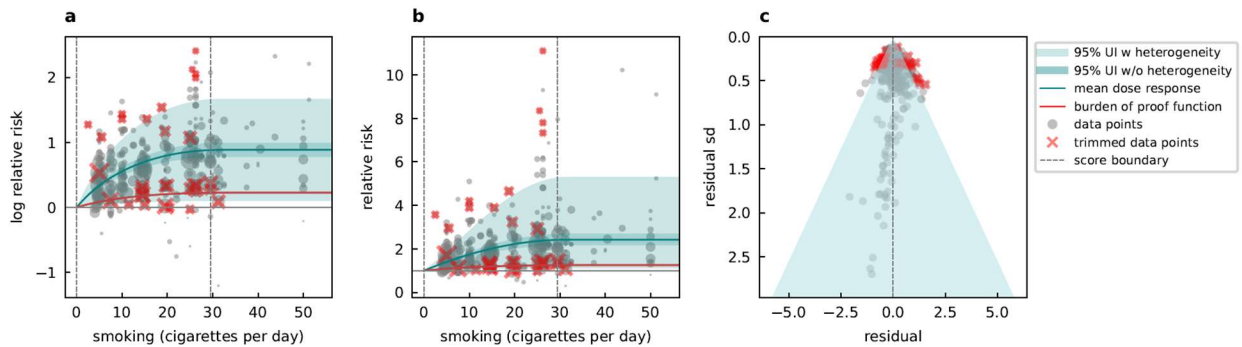

## Cervical cancer

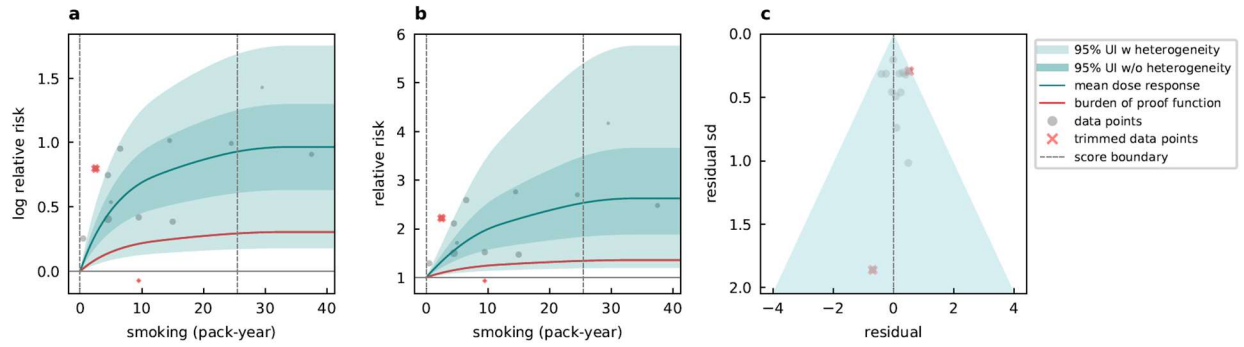

## Macular degeneration

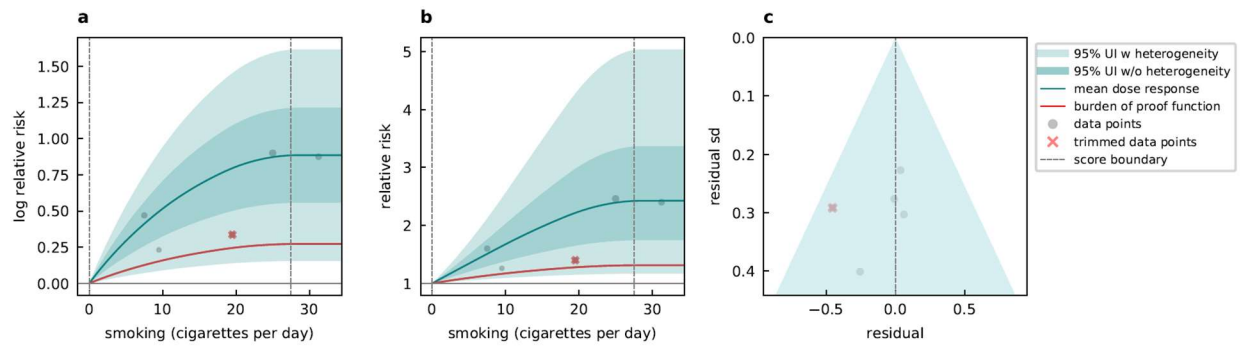

## Cataracts

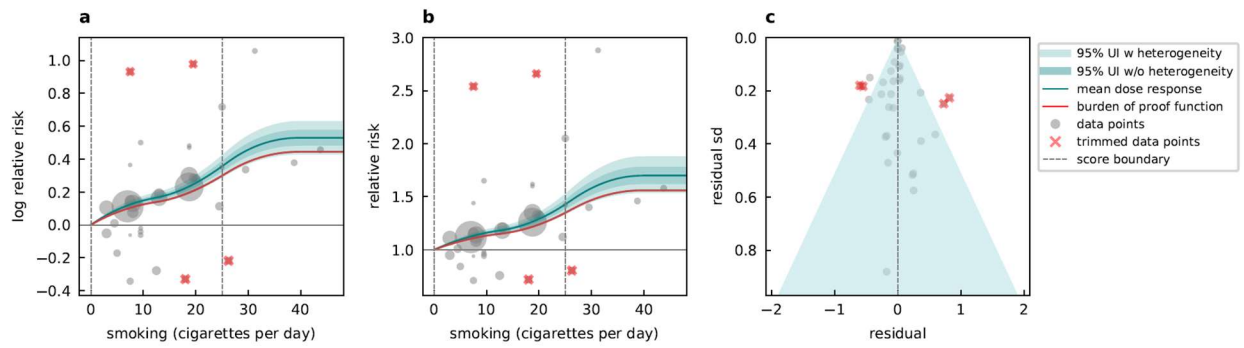

## Rheumatoid arthritis

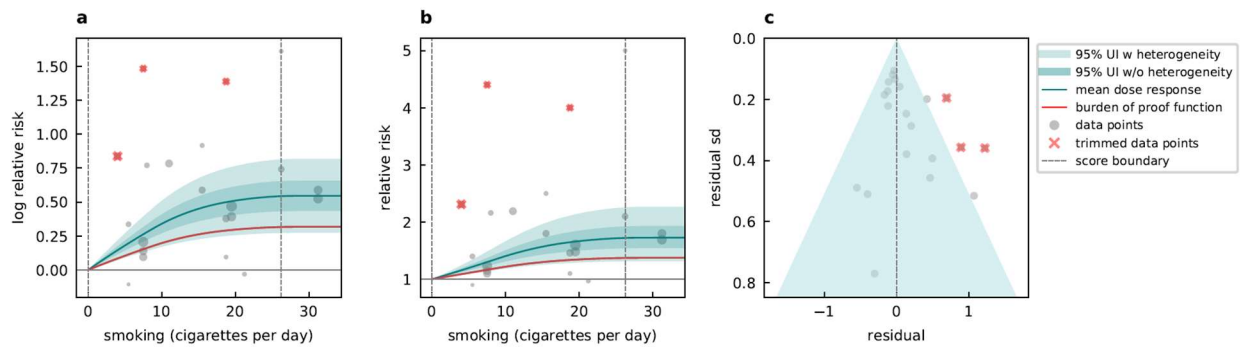



### Parkinson's disease (protective effects)

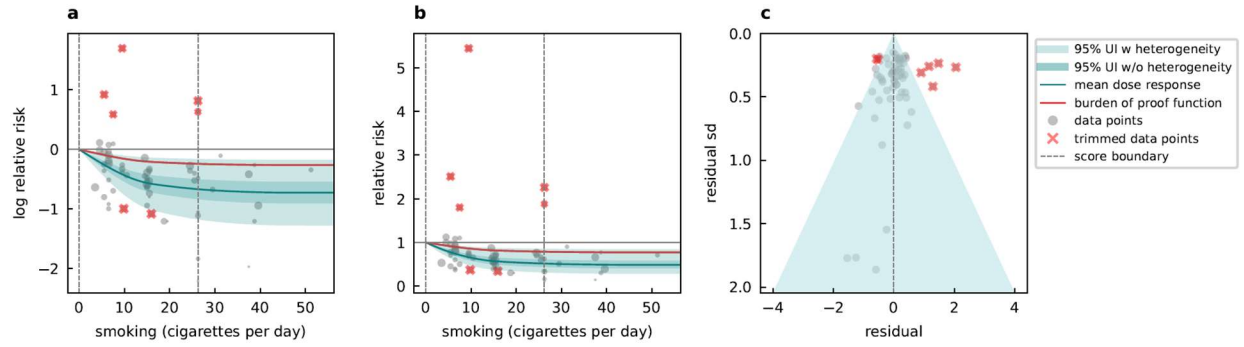

### Section 4.4: Two-star smoking-outcome pairs

#### Nasopharyngeal cancer

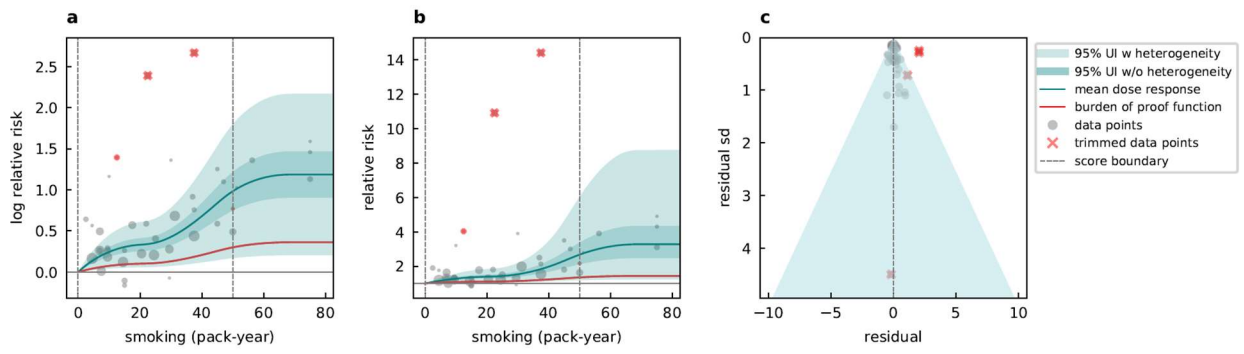

#### Alzheimer's and other dementia

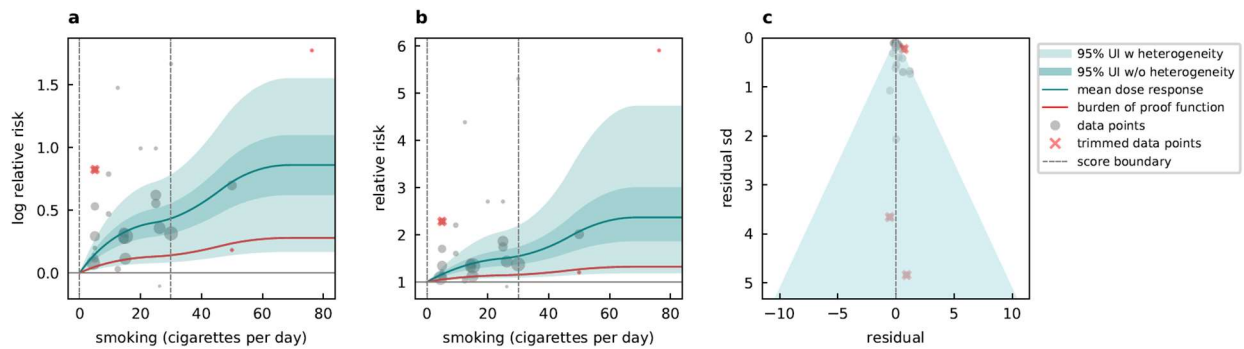

#### Gallbladder disease

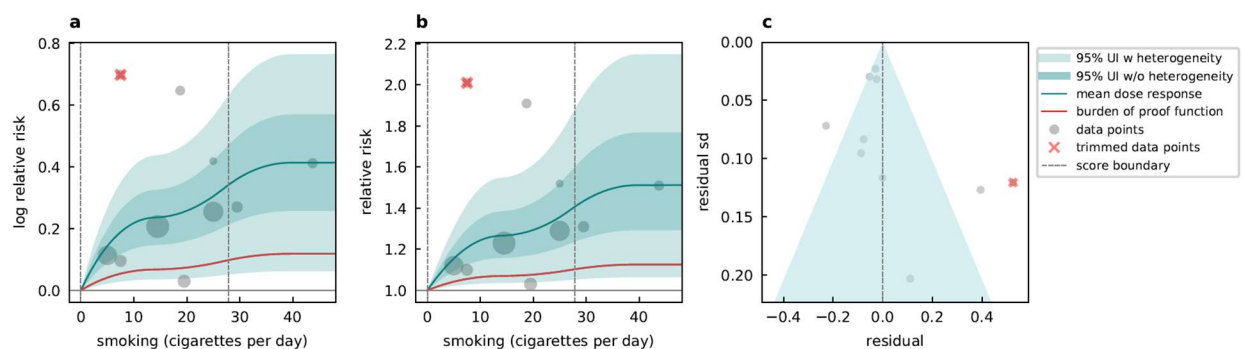

## Lip and oral cavity cancer

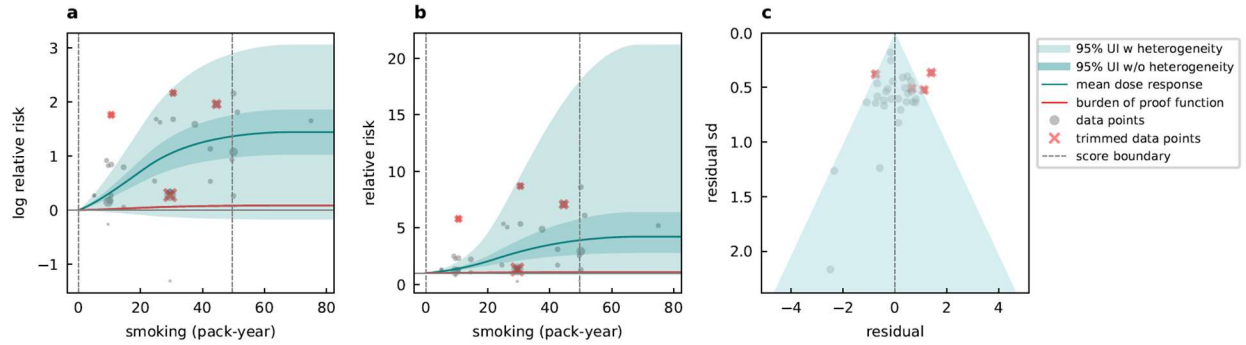

## Atrial fibrillation and flutter (reference age group: 55-59)

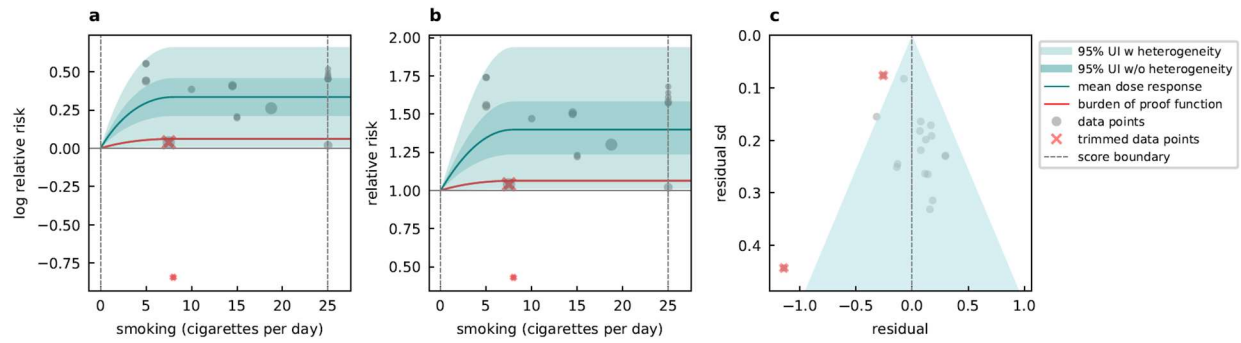

## Breast cancer

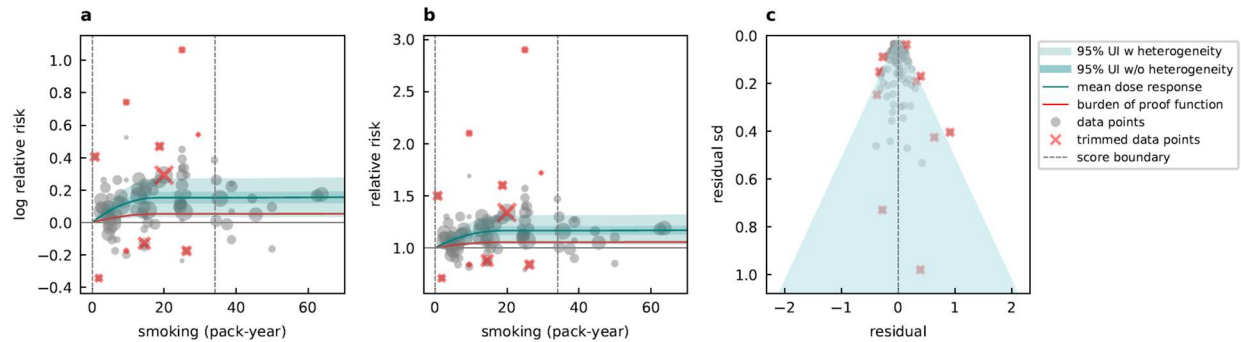

## Section 4.5: One-star smoking-outcome pairs

### Leukemia

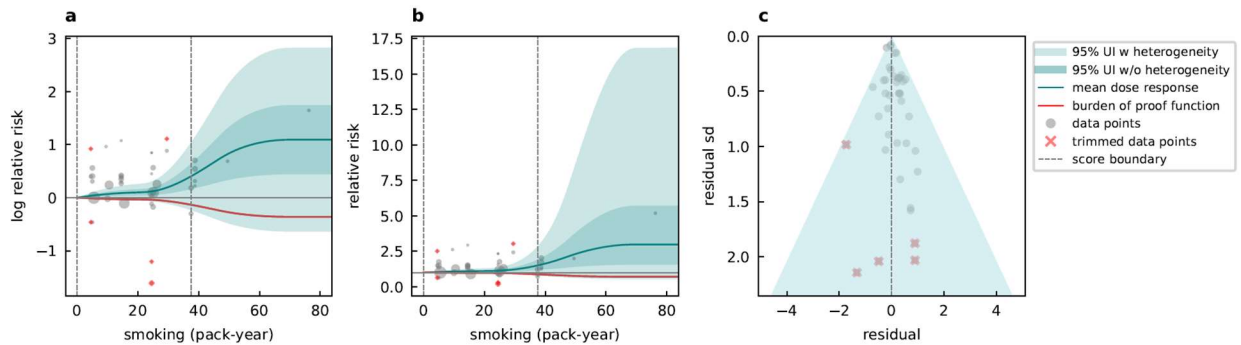

## Liver cancer

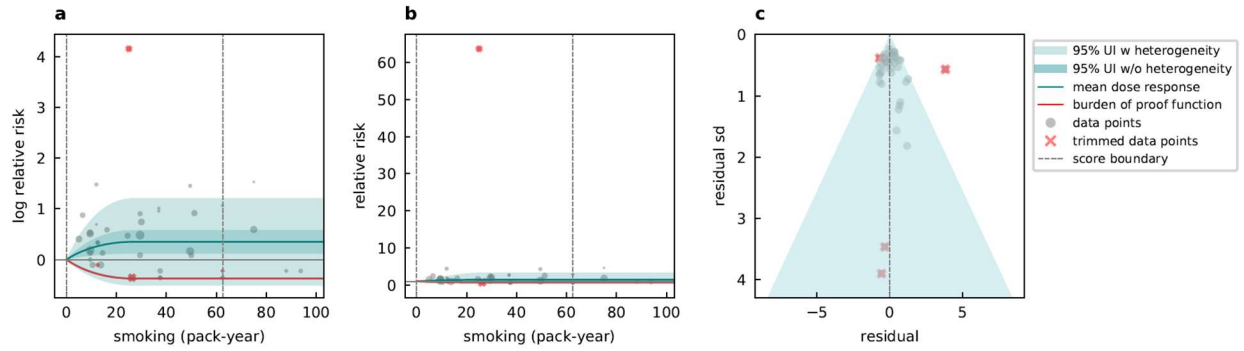

## Kidney cancer

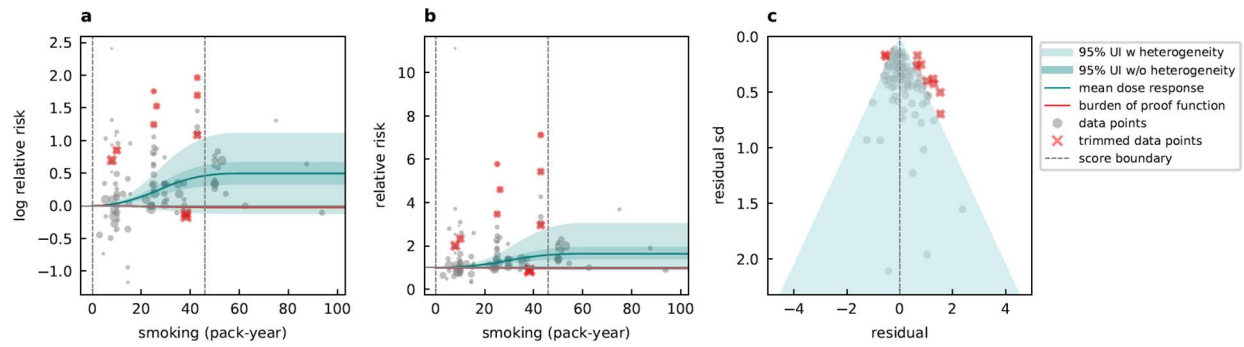

## Colon and rectum cancer

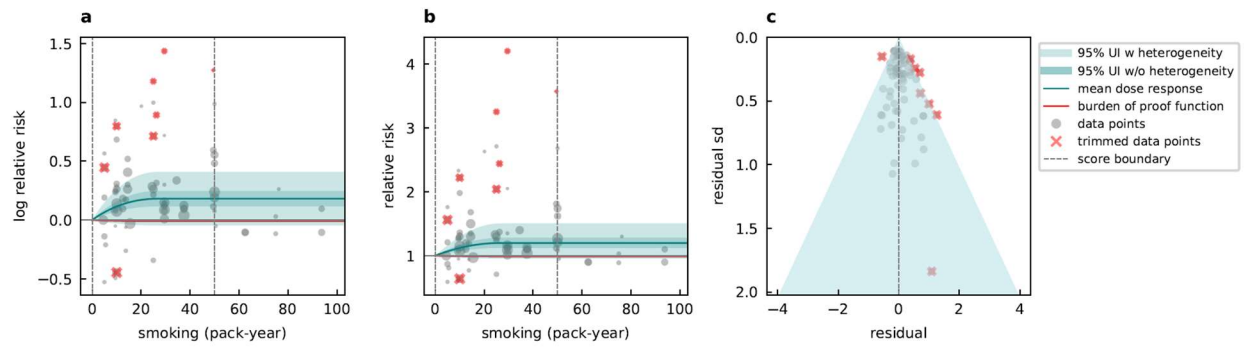

## Prostate cancer

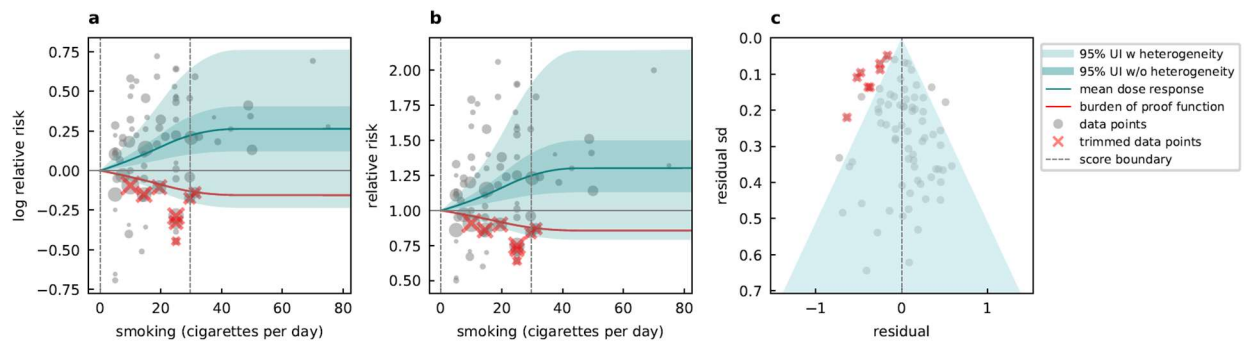

## Asthma

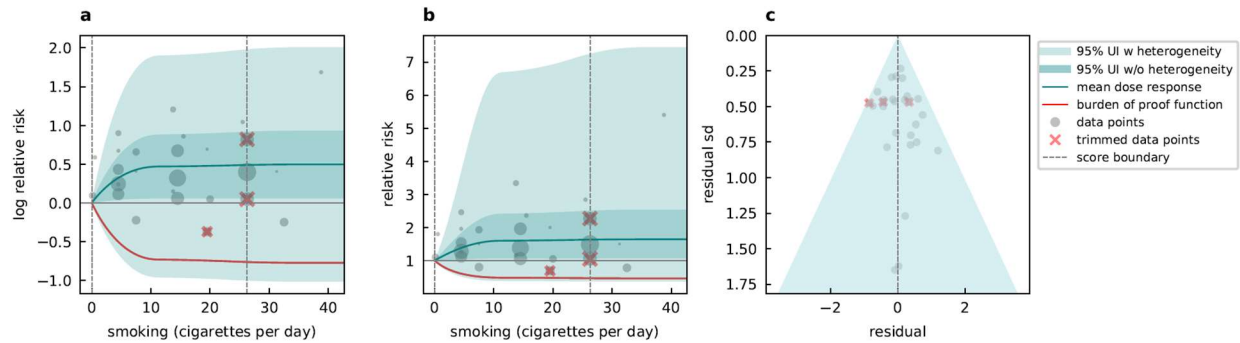

**Figure 1: Dose-response relative risk curves of smoking on different health outcomes.**

**A. Log-relative risk function.**

**B. Relative risk function.**

**C. A modified funnel plot showing the residuals (relative to 0) on the x-axis and the estimated standard deviation (SD) that includes reported SD and between-study heterogeneity on the y-axis.**

## Section 5: Supplementary methods

### Section 5.1: The scope of the systematic literature review

Since GBD 2016 we have performed systematic review and meta-analysis of all case-control and prospective cohort studies reporting a relative risk (RR), hazard ratio (HR), or odds ratio (OR) for any risk-outcome pair studied in GBD 2016. In GBD 2019, we had included 36 risk-outcome pairs for smoking. Studies were included if they reported a categorical or continuous dose for smoked tobacco consumption (pack-years or cigarettes per day) as well as uncertainty measures of the estimated risk, and the population under study was the general population. Studies were excluded if they used cross-sectional or retrospective cohort design or if the study was conducted among specific high-risk populations (e.g., people with type 2 diabetes or drug users, etc.).

In GBD 2020, we undertook an effort to improve our RR curves by refining our search strings to capture a larger number of studies than was not identified by previous search strings. Studies published between 01/01/1970 and 31/05/2022 were reviewed. Of those articles captured, prospective cohort and case-control studies were included if they reported the effect sizes (RR, HR, or OR) of an association between a continuous or categorical dose for smoked tobacco consumption and a GBD outcome with uncertainty. Information on study design, confounders controlled for, sample representativeness, and measurement of exposure and outcomes was also extracted.

In GBD 2020, we also employed a new approach to produce age-specific RR curves for CVD outcomes, which involves estimating an age pattern of excess risk (i.e.,  $RR-1$ ) of smoking for CVD outcomes. To estimate the age pattern, we performed a systematic review of literature on risk of smoking for five CVD outcomes, namely, ischemic heart disease, stroke, atrial fibrillation and flutter, aortic aneurysm, and peripheral arterial disease. We developed a search string to search for articles reporting any association of binary smoking status (i.e., current, former, and ever smokers) on the five CVD outcomes from 01/01/1970 to 05/01/2019 and only included studies reporting age-specific risk (RR, OR, HR) of smoking status, which is different from the estimation of dose-response risk of smoking for which we only included studies reporting dose-specific risk. Information on study design, confounders controlled for, sample representativeness, type of exposure (i.e., current, former, and ever smoker), measurement of exposure and outcomes was also extracted for bias adjustment. Table 2 summarizes the number of studies included for estimating the dose-response risk curve and the age pattern of risk for the CVD outcomes.

**Table 5: Data inputs for relative risks for smoked tobacco use**

|                                      | <b>Total unique sources</b> | <b>Total sources*</b> | <b>Total observations</b> |
|--------------------------------------|-----------------------------|-----------------------|---------------------------|
| Dose-response risk                   | 559                         | 634                   | 2575                      |
| Age pattern of risk for CVD outcomes | 159                         | 244                   | 1318                      |

\* The total number of source-outcome combinations included in the relative risk models, accounting for sources that reported relative risks for multiple outcomes.

### *Section 5.2: Detailed methods for estimating the dose-response risk curves of the 36 health outcomes*

The same risk-outcome pairs from GBD 2019 were used for GBD 2020: tuberculosis, lower respiratory tract infections, esophageal cancer, stomach cancer, bladder cancer, liver cancer, laryngeal cancer, lung cancer, breast cancer, cervical cancer, colorectal cancer, lip and oral cancer, nasopharyngeal cancer, other pharyngeal cancer, pancreatic cancer, kidney cancer, leukemia, ischemic heart disease, ischemic stroke, hemorrhagic stroke, subarachnoid hemorrhage, atrial fibrillation and flutter, aortic aneurysm, peripheral arterial disease, chronic obstructive pulmonary disease, other chronic respiratory diseases, asthma, peptic ulcer disease, gallbladder and biliary tract diseases, Alzheimer disease and other dementias, Parkinson disease (protective), multiple sclerosis, type 2 diabetes, rheumatoid arthritis, low back pain, cataracts, macular degeneration, and fracture.

For GBD 2020, the risk of all risk outcome pairs is evaluated by continuous smoking exposure level (i.e., pack-year, cigarettes per smoker per day and years since cessation), except for fracture, whose risk is evaluated by binary smoking exposure (i.e., smoker vs non-smoker/never smoker).

#### **Section 5.2.1: Dose-response risk curves**

Since GBD 2016, we had used the studies identified through the systematic review to estimate dose-response risk of smoking on related health outcomes, using DisMod ODE. We chose DisMod ODE rather than a conventional mixed effects meta-regression because of its ability to estimate nonparametric splines over doses (i.e., there is usually a non-linear relationship between smoking exposure level and outcome risk) and incorporate heterogeneous doses through dose-integration (i.e., most studies report smoking exposure level categorically in wide ranges and DisMod ODE can estimate risk of specific exposure level when categories overlap across studies, through an integration step).

For GBD 2020, we used the studies identified through the updated systematic review to estimate new dose-response curves using MR-BRT for all outcomes. Importantly, this new method takes into account the risk of biases in the RR estimation by selecting and including important covariates of the risk estimates in the model (e.g., measurement of exposure and outcomes, representativeness, and adjustment level of the risk estimates) and incorporates unexplained between-study heterogeneity into the uncertainty of the RR estimates. The results of the meta-regression were used to estimate a non-parametric curve for all doses between zero and 100 pack-years or cigarettes per smoker per day and their corresponding relative risks. For all outcomes, we assumed the relative risk was the same for both sexes, except for breast cancer, cervical cancer, and prostate cancer, which were assumed to apply only to females or to male.

For data-sparse risk-outcome pairs, we implemented the Fisher Scoring correction to the heterogeneity parameter. When data are sparse, the between-study heterogeneity parameter estimate may be 0, simply due to lack of data. The Fisher Scoring correction uses a quantile of gamma, which is sensitive to the number of studies, study design, and reported uncertainty.

We have also added methodology that can detect and flag publication bias. The approach is based on the classic Egger’s Regression strategy, which is applied to the residuals in our model. In the current implementation, we do not correct for publication bias, but flag the risk-outcome pairs where the risk for publication bias is significant.

In the table below, we list each risk outcome pair that is updated in GBD 2020 along with several of the key modelling parameters and results. The formulation for MR-BRT is described in detail in Zheng et al. (2021)<sup>28</sup>.

**Table 6: MR-BRT model specifications by risk-outcome pair**

| <b>Risk-outcome</b>             | <b>Type of risk</b>  | <b>Spline degree, # interior knots</b> | <b>Priors &amp; constraints</b>                                                                     |
|---------------------------------|----------------------|----------------------------------------|-----------------------------------------------------------------------------------------------------|
| Atrial fibrillation and flutter | Continuous, Harmful  | Quadratic, 3 I knots                   | Monotonic increasing, right linear tail, Gaussian max derivative prior on the right tail (0, 0.001) |
| Alzheimer and other dementia    | Continuous, Harmful  | Quadratic, 3 I knots                   | Monotonic increasing, right linear tail, Gaussian max derivative prior on the right tail (0, 0.001) |
| Aortic aneurism                 | Continuous, Harmful  | Quadratic, 3 I knots                   | Monotonic increasing, right linear tail, Gaussian max derivative prior on the right tail (0, 0.001) |
| Asthma                          | Continuous, Harmful  | Quadratic, 3 I knots                   | Monotonic increasing, right linear tail, Gaussian max derivative prior on the right tail (0, 0.001) |
| Bladder cancer                  | Continuous, Harmful  | Quadratic, 3 I knots                   | Monotonic increasing, right linear tail, Gaussian max derivative prior on the right tail (0, 0.001) |
| Breast cancer                   | Continuous, Harmful  | Quadratic, 3 I knots                   | Monotonic increasing, right linear tail, Gaussian max derivative prior on the right tail (0, 0.001) |
| Cataracts                       | Continuous, Harmful  | Quadratic, 3 I knots                   | Monotonic increasing, right linear tail, Gaussian max derivative prior on the right tail (0, 0.001) |
| Cervical cancer                 | Continuous, Harmful  | Quadratic, 3 I knots                   | Monotonic increasing, right linear tail, Gaussian max derivative prior on the right tail (0, 0.001) |
| Colon and rectum cancer         | Continuous, Harmful  | Quadratic, 3 I knots                   | Monotonic increasing, right linear tail, Gaussian max derivative prior on the right tail (0, 0.001) |
| COPD                            | Continuous, Harmful  | Quadratic, 3 I knots                   | Monotonic increasing, right linear tail, Gaussian max derivative prior on the right tail (0, 0.001) |
| Type 2 diabetes                 | Continuous, Harmful  | Quadratic, 3 I knots                   | Monotonic increasing, right linear tail, Gaussian max derivative prior on the right tail (0, 0.001) |
| Esophageal cancer               | Continuous, Harmful  | Quadratic, 3 I knots                   | Monotonic increasing, right linear tail, Gaussian max derivative prior on the right tail (0, 0.001) |
| Gallbladder diseases            | Continuous, Harmful  | Quadratic, 3 I knots                   | Monotonic increasing, right linear tail, Gaussian max derivative prior on the right tail (0, 0.001) |
| Fracture (hip and non-hip)      | Dichotomous, Harmful | N/A                                    | N/A                                                                                                 |

|                              |                        |                      |                                                                                                     |
|------------------------------|------------------------|----------------------|-----------------------------------------------------------------------------------------------------|
| Ischemic health disease      | Continuous, Harmful    | Quadratic, 3 I knots | Monotonic increasing, right linear tail, Gaussian max derivative prior on the right tail (0, 0.001) |
| Kidney cancer                | Continuous, Harmful    | Quadratic, 3 I knots | Monotonic increasing, right linear tail, Gaussian max derivative prior on the right tail (0, 0.001) |
| Laryngeal cancer             | Continuous, Harmful    | Quadratic, 3 I knots | Monotonic increasing, right linear tail, Gaussian max derivative prior on the right tail (0, 0.001) |
| Lower back pain              | Continuous, Harmful    | Quadratic, 3 I knots | Monotonic increasing, right linear tail, Gaussian max derivative prior on the right tail (0, 0.001) |
| Leukemia                     | Continuous, Harmful    | Quadratic, 3 I knots | Monotonic increasing, right linear tail, Gaussian max derivative prior on the right tail (0, 0.001) |
| Lip oral cavity cancer       | Continuous, Harmful    | Quadratic, 3 I knots | Monotonic increasing, right linear tail, Gaussian max derivative prior on the right tail (0, 0.001) |
| Liver cancer                 | Continuous, Harmful    | Quadratic, 3 I knots | Monotonic increasing, right linear tail, Gaussian max derivative prior on the right tail (0, 0.001) |
| lower respiratory infections | Continuous, Harmful    | Quadratic, 3 I knots | Monotonic increasing, right linear tail, Gaussian max derivative prior on the right tail (0, 0.001) |
| Lung cancer                  | Continuous, Harmful    | Quadratic, 3 I knots | Monotonic increasing, right linear tail, Gaussian max derivative prior on the right tail (0, 0.001) |
| Macular degeneration         | Continuous, Harmful    | Quadratic, 3 I knots | Monotonic increasing, right linear tail, Gaussian max derivative prior on the right tail (0, 0.001) |
| Multiple sclerosis           | Continuous, Harmful    | Quadratic, 3 I knots | Monotonic increasing, right linear tail, Gaussian max derivative prior on the right tail (0, 0.001) |
| Nasopharyngeal cancer        | Continuous, Harmful    | Quadratic, 3 I knots | Monotonic increasing, right linear tail, Gaussian max derivative prior on the right tail (0, 0.001) |
| Other pharynx cancer         | Continuous, Harmful    | Quadratic, 3 I knots | Monotonic increasing, right linear tail, Gaussian max derivative prior on the right tail (0, 0.001) |
| Pancreatic cancer            | Continuous, Harmful    | Quadratic, 3 I knots | Monotonic increasing, right linear tail, Gaussian max derivative prior on the right tail (0, 0.001) |
| Parkinson                    | Continuous, Protective | Quadratic, 3 I knots | Monotonic decreasing, right linear tail, Gaussian max derivative prior on the right tail (0, 0.001) |
| Peptic ulcer                 | Continuous, Harmful    | Quadratic, 3 I knots | Monotonic increasing, right linear tail, Gaussian max derivative prior on the right tail (0, 0.001) |
| Peripheral artery disease    | Continuous, Harmful    | Quadratic, 3 I knots | Monotonic increasing, right linear tail, Gaussian max derivative prior on the right tail (0, 0.001) |

|                                                                           |                     |                      |                                                                                                     |
|---------------------------------------------------------------------------|---------------------|----------------------|-----------------------------------------------------------------------------------------------------|
| Prostate cancer                                                           | Continuous, Harmful | Quadratic, 3 I knots | Monotonic increasing, right linear tail, Gaussian max derivative prior on the right tail (0, 0.001) |
| Rheumatoid arthritis                                                      | Continuous, Harmful | Quadratic, 3 I knots | Monotonic increasing, right linear tail, Gaussian max derivative prior on the right tail (0, 0.001) |
| Stomach cancer                                                            | Continuous, Harmful | Quadratic, 3 I knots | Monotonic increasing, right linear tail, Gaussian max derivative prior on the right tail (0, 0.001) |
| Stroke (ischemic stroke, hemorrhagic stroke, and subarachnoid hemorrhage) | Continuous, Harmful | Quadratic, 3 I knots | Monotonic increasing, right linear tail, Gaussian max derivative prior on the right tail (0, 0.001) |
| Tuberculosis                                                              | Continuous, Harmful | Quadratic, 3 I knots | Monotonic increasing, right linear tail, Gaussian max derivative prior on the right tail (0, 0.001) |

**Table 7: MR BRT estimated parameters and bias covariates by risk-outcome pair**

| <b>Risk-outcome</b>             | <b>Unit of risk</b>   | <b>Selected bias covariates</b>              | <b>Mean gamma solution</b> |
|---------------------------------|-----------------------|----------------------------------------------|----------------------------|
| Atrial fibrillation and flutter | cigarettes per day    | None                                         | 0.000                      |
| Alzheimer and other dementia    | cigarettes per day    | None                                         | 0.054                      |
| Aortic aneurism                 | cigarettes per day    | None                                         | 0.000                      |
| Asthma                          | cigarettes per day    | None                                         | 1.651                      |
| Bladder cancer                  | pack-year             | None                                         | 0.052                      |
| Breast cancer                   | pack-year             | cv_subpopulation                             | 0.000                      |
| Cataracts                       | cigarettes per day    | None                                         | 0.000                      |
| Cervical cancer                 | pack-year             | None                                         | 0.000                      |
| Colon and rectum cancer         | pack-year             | None                                         | 0.090                      |
| COPD                            | pack-year             | cv_older, cv_adj_L1                          | 0.022                      |
| Type 2 diabetes                 | cigarettes per day    | cv_subpopulation                             | 0.055                      |
| Esophageal cancer               | pack-year             | None                                         | 0.106                      |
| Gallbladder diseases            | cigarettes per day    | cv_adj_L0                                    | 0.000                      |
| Fracture (hip and non-hip)      | Binary smoking status | cv_subpopulation, cv_risk_measure, cv_adj_L2 | 0.032                      |



|                                                                                 |                    |                                          |       |
|---------------------------------------------------------------------------------|--------------------|------------------------------------------|-------|
| Ischemic health disease                                                         | cigarettes per day | cv_adj_L2,<br>cv_subpopulation, cv_older | 0.190 |
| Kidney cancer                                                                   | pack-year          | None                                     | 0.078 |
| Laryngeal cancer                                                                | pack-year          | None                                     | 0.000 |
| Lower back pain                                                                 | cigarettes per day | None                                     | 0.000 |
| Leukemia                                                                        | pack-year          | None                                     | 0.000 |
| Lip oral cavity cancer                                                          | pack-year          | cv_adj_L1                                | 0.158 |
| Liver cancer                                                                    | pack-year          | None                                     | 0.429 |
| Lower respiratory infection                                                     | cigarettes per day | None                                     | 0.000 |
| Lung cancer                                                                     | pack-year          | cv_adj_L1, cv_adj_L0,<br>cv_adj_L2       | 0.063 |
| Macular degeneration                                                            | cigarettes per day | None                                     | 0.000 |
| Multiple sclerosis                                                              | cigarettes per day | None                                     | 0.000 |
| Nasopharyngeal cancer                                                           | pack-year          | cv_adj_L0                                | 0.065 |
| Other pharynx cancer                                                            | pack-year          | None                                     | 0.000 |
| Pancreatic cancer                                                               | pack-year          | None                                     | 0.000 |
| Parkinson                                                                       | cigarettes per day | cv_adj_L2,<br>cv_outcome_selfreport      | 0.000 |
| Peptic ulcer disease                                                            | cigarettes per day | cv_adj_L1,<br>cv_subpopulation           | 0.000 |
| Peripheral artery disease                                                       | cigarettes per day | cv_subpopulation                         | 0.000 |
| Prostate cancer                                                                 | cigarettes per day | None                                     | 0.170 |
| Rheumatoid arthritis                                                            | cigarettes per day | None                                     | 0.000 |
| Stomach cancer                                                                  | pack-year          | None                                     | 0.000 |
| Stroke (ischemic stroke,<br>hemorrhagic stroke, and<br>subarachnoid hemorrhage) | cigarettes per day | None                                     | 0.146 |
| Tuberculosis                                                                    | cigarettes per day | None                                     | 0.038 |

† Definitions of bias covariates:

**cv\_subpopulation:** 0 for risk estimates are likely generalizable to the general population because the sample was based on the general population with reasonable exclusions for pre-existing disease states; 1 for risk estimates of sub-groups such as high-risk groups

**cv\_adj\_L0, cv\_adj\_L1, cv\_adj\_L2:** cascading dummy variables for adjustment level of the risk estimates (i.e., how many confounders are adjusted for in the regression model for the risk estimate). There are four adjustment levels, namely, 1.no adjustment, 2.only adjusting for age and sex, 3.adjusting for age and sex and  $\leq 3$  other covariates, and 4.adjusting for age and sex and  $> 3$  other covariates. If the adjustment level is 1, cv\_adj\_L0=1, cv\_adj\_L1=1, cv\_adj\_L2=1; if the adjustment level is 2, cv\_adj\_L0=1, cv\_adj\_L1=1, cv\_adj\_L2=0; if the adjustment level is 3, then cv\_adj\_L0=1, cv\_adj\_L1=0, cv\_adj\_L2=0; if the adjustment level is 4, then cv\_adj\_L0=0, cv\_adj\_L1=0, cv\_adj\_L2=0.

**cv\_outcome\_selfreport:** 0 for measurement of outcome based on assays, tests, or physician observation and 1 for self-report outcome.

**cv\_older:** 0 if the population contains both young and old people; 1 if the population only contains old people.

**cv\_non\_smoker:** 0 if the unexposed group is never smoker; 1 if the unexposed group is non-smoker (never smoker and possible former smoker).

**cv\_risk\_measure:** 0 if the risk is reported as Relative Risk; 1 if the risk is reported as Odds Ratios or Hazard Ratios.

### Section 5.2.2: Age-specific dose-response risk curves for CVD outcomes

For all non-CVD outcomes, we assumed the risk curve to be the same for all ages. However, the risk of smoking on CVD outcomes (i.e., stroke, ischemic heart disease, atrial fibrillation and flutter, aortic aneurysm, and peripheral arterial disease) is well known to attenuate with increasing age and thus we produced age-specific risk curves for all CVD outcomes. Previously, we used a linear relationship between age and log risk to adjust all RR data to a specific age group (e.g., 45-49). Then, we modelled the risk curve for each age group using the adjusted age-group specific data. This approach often produced curves with different shapes for different age groups and tended to underestimate the risk for older age groups since we set the log RR to be 0 for the terminal age group (e.g., 95+) in the linear function.

In GBD 2020, we adopted a new approach to produce the age-specific risk curves by producing an age pattern of smoking risk on CVD outcomes and adjusting the risk curve of the reference age group using the age pattern of risk to produce age-group specific risk curves. Briefly, we first estimated the reference dose-response risk of smoking for each CVD outcome using dose-specific RR data of each outcome regardless of the age group information. This step was the same with other non-CVD outcomes. Once we had the reference curve, we determined the age group of the reference curve by calculating the weighted mean age across all dose-specific RR data (weighted by  $1/SE$  of each datum). For example, if the weighted mean age of all dose-specific RR data was 56.5, we determined the age group of the reference risk curve to be 55-59. For cohort studies, the mean age was calculated as mean age at baseline plus the mean/median years of follow-up (if only maximum years of follow-up is reported, we added half of the maximum years to the mean age at baseline). For the case-control studies, the mean age was just the reported mean age at baseline (in case the mean age is not reported, we used the midpoint of age range as the mean age instead). In the third step, we extracted age-group specific RR data and relevant bias covariates from literature identified in the systematic review mentioned above, and we used MR-BRT to model the age pattern of excess risk (i.e.,  $RR-1$ ) of smoking on CVD outcomes with age-group specific excess RR data of all CVD outcomes. In the final model, we included age as spline, random effects of study, and the bias covariates of exposure types (i.e., current, former, and ever smokers), which were selected by an algorithm described elsewhere.<sup>2</sup> When predicting the age pattern of the excess risk of smoking on CVD outcomes using the fitted model, we did not include between study heterogeneity to reduce uncertainty in the prediction. Figure S1 below shows the estimated age pattern of excess risk of smoking on CVD along with its 95% uncertainty intervals. In the fourth step, we calculated the age attenuation factors (AF) of excess risk compared with the reference age group for each CVD outcome as ratio of the estimated excess risk of each age group to that of the reference age group. We did the calculation at the draw level to obtain 1000 draws of

the AF for each age group. Figure S2 below shows the AF for stroke along with its 95% uncertainty intervals. Once we had the AF, in the last step, we adjusted the risk curve of the reference age group from step 1 using equation (1) to produce the age-group specific risk curves for each CVD outcome.

We did the age adjustment on draw level so that the uncertainty of the AF can be naturally incorporated in the final adjusted age-specific RR curves. Figure S3 shows the age AF adjusted age-group specific RR curves for stroke outcome.

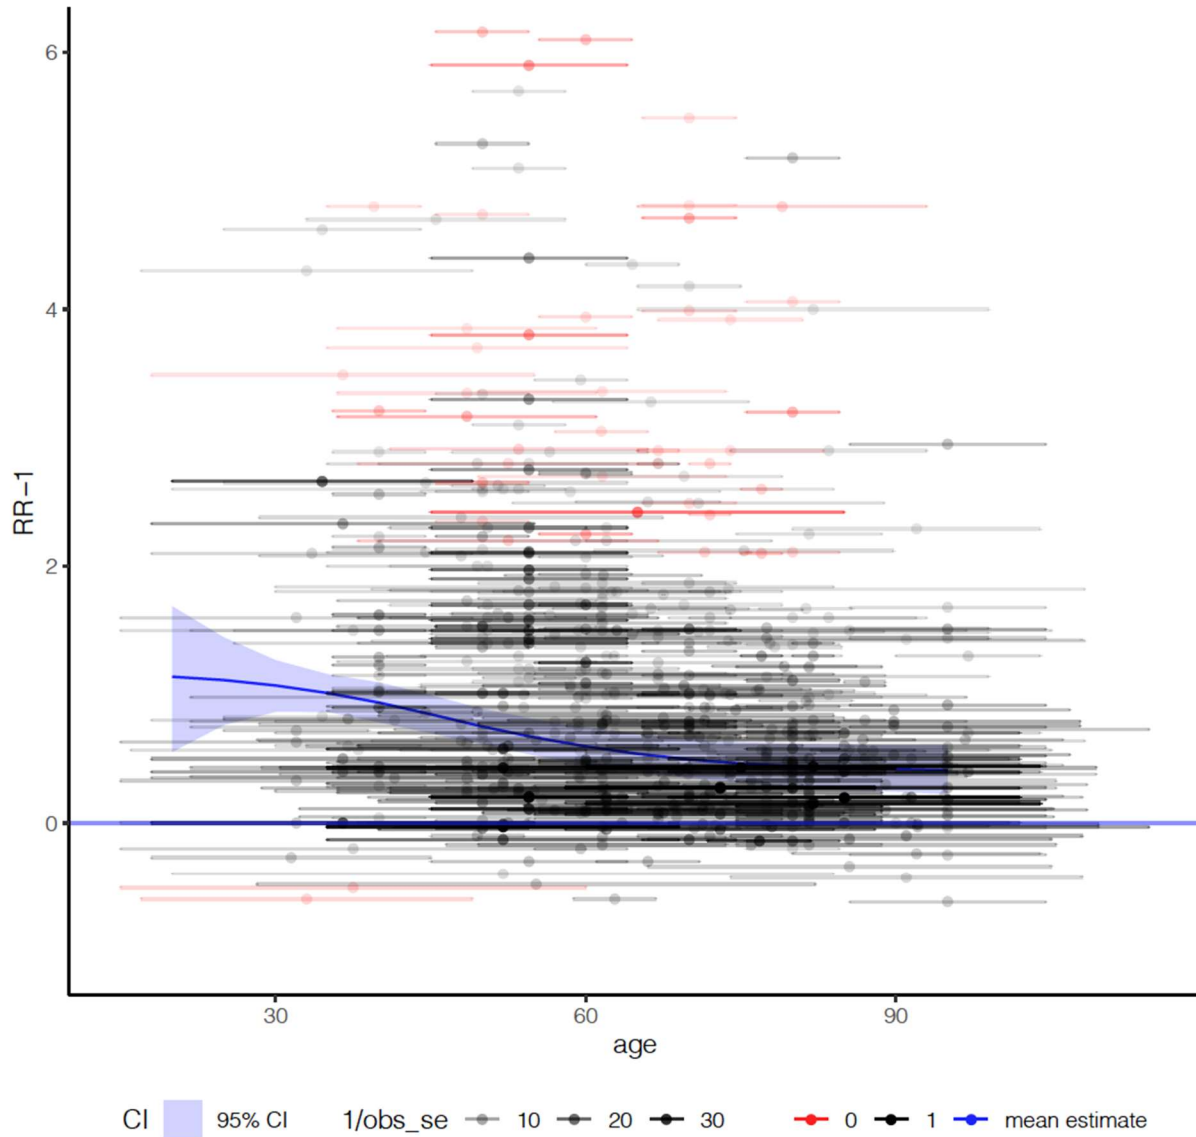

**Figure 2: estimated age pattern of excess risk of smoking on CVD outcomes**

*Note: The red points are trimmed by MR-BRT and the black points are included in the final model. The blue curve is the age trends of risk of smoking on CVD outcomes. The shaded area is the 95% of the age trends not accounting for between study heterogeneity. The whiskers around the data points are the age range of each reported estimate. The opacity of the data point indicates the inverse of standard error of the estimate, with more opaque data having smaller standard error.*

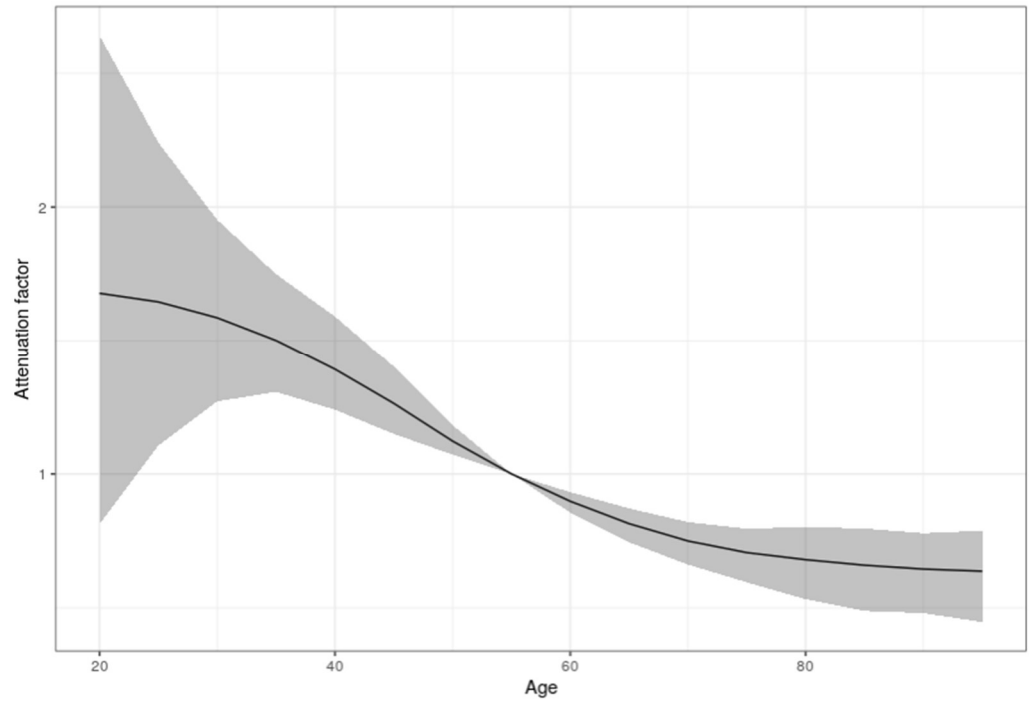

Figure 3: age attenuation factors of excess risk of smoking on stroke compared with the reference age group

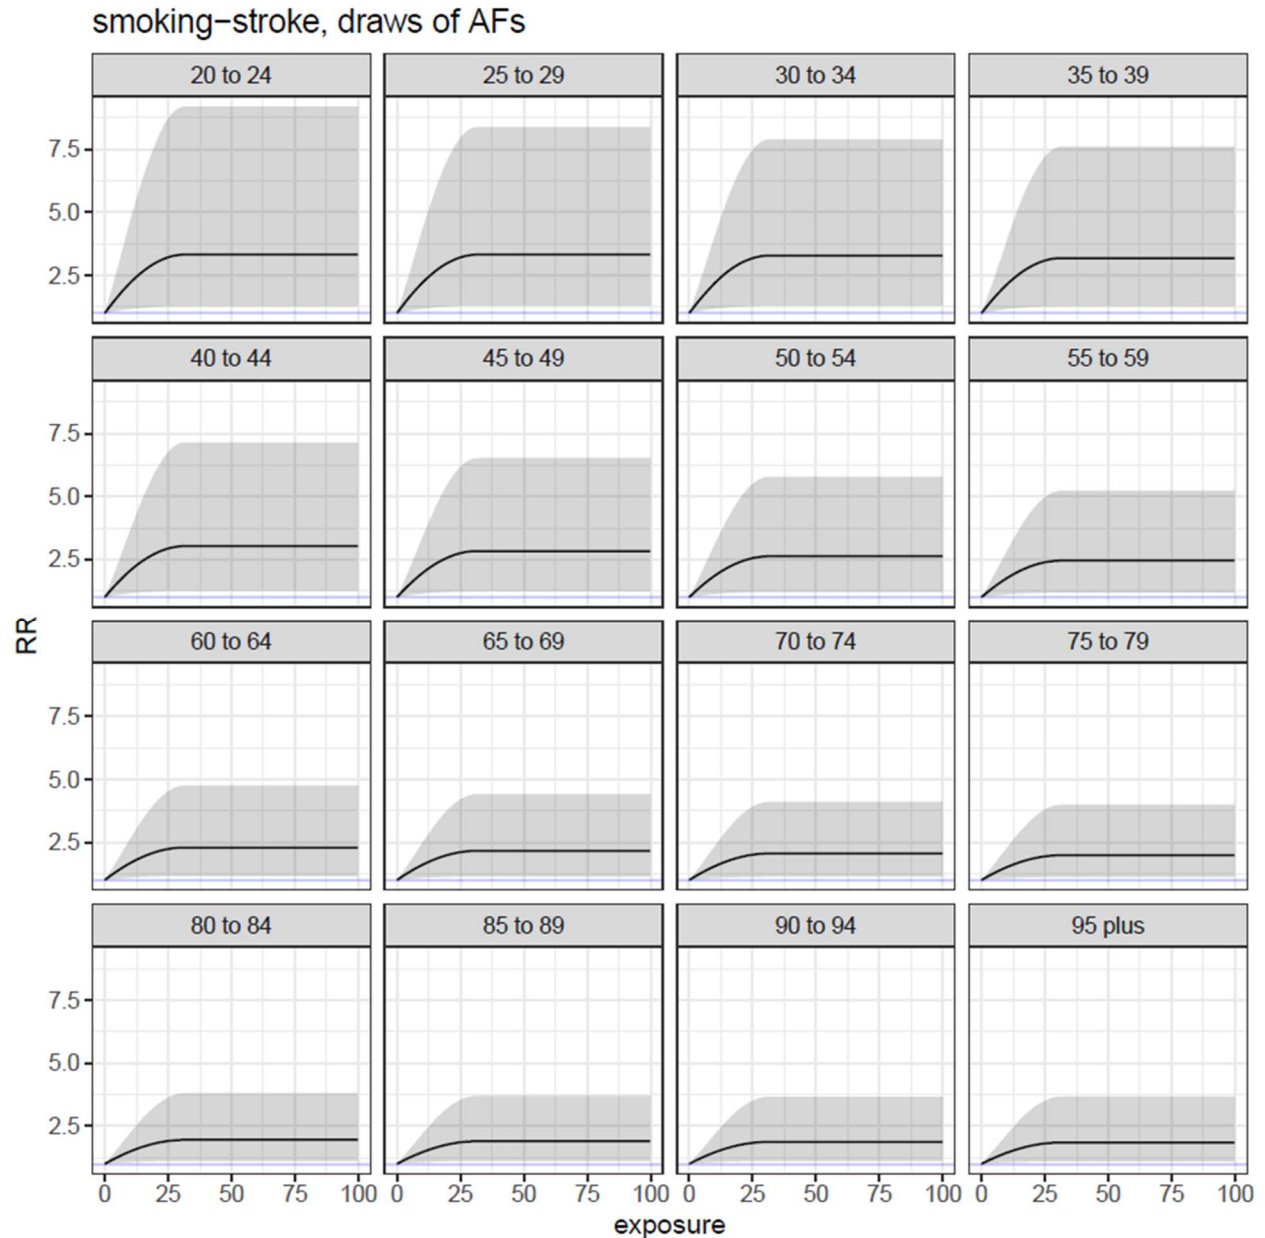

Figure 4: AF adjusted age-group specific RR curves for stroke, reference age group 55-59. The exposure is in units of cigarette-equivalents per smoker per day.

## [Section 6: Sensitivity analysis](#)

### [Section 6.1: Testing sensitivity of trimming approach](#)

Similar to our approach to evaluate the impact of the monotonicity constraint, we conducted another sensitivity analysis to evaluate the impact of our 10% trimming on the shape of the risk curves for each risk-outcome pair. Our final models involved trimming 10% of the data for each outcome to remove the likelihood of extreme data and reduce publication bias favoring extreme values. We ran preliminary models with the same model specifications as our final models, except for the 10% trimming, and compared the results of both sets of models. These results can be found below.

**Figure 5: Results of model without 10% trimming**

The figures below reflect the results of the model without trimming using the final model specificities for every risk-outcome pair. The first of each set of outcome plots presents the dose-response relative risk in log space, while the middle figure is the dose-response relative risk in linear space. The right-most figure reflects the residual cone for all of the data inputs in the risk-outcome pair. The reference exposure for all of these risk curves is the theoretical minimum risk exposure level, 0 cigarettes per day or 0 pack-years (depending on the outcome in question).

**COPD**

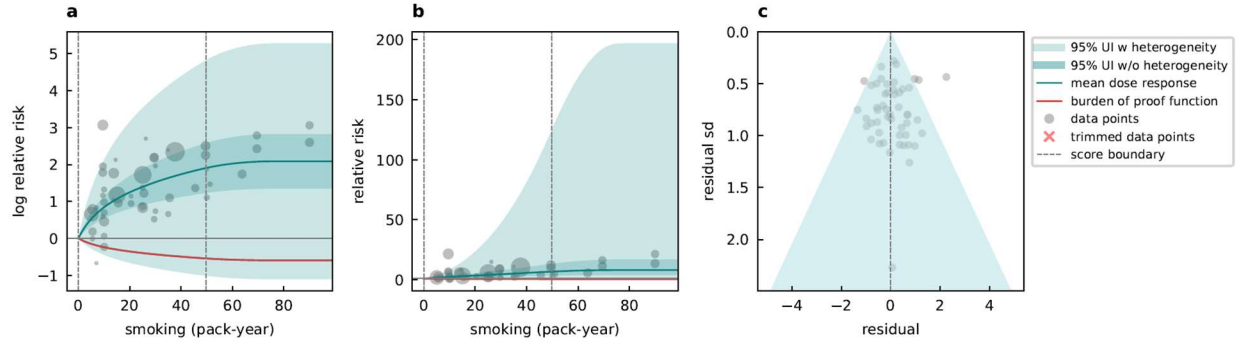

**Colon and Rectum Cancer**

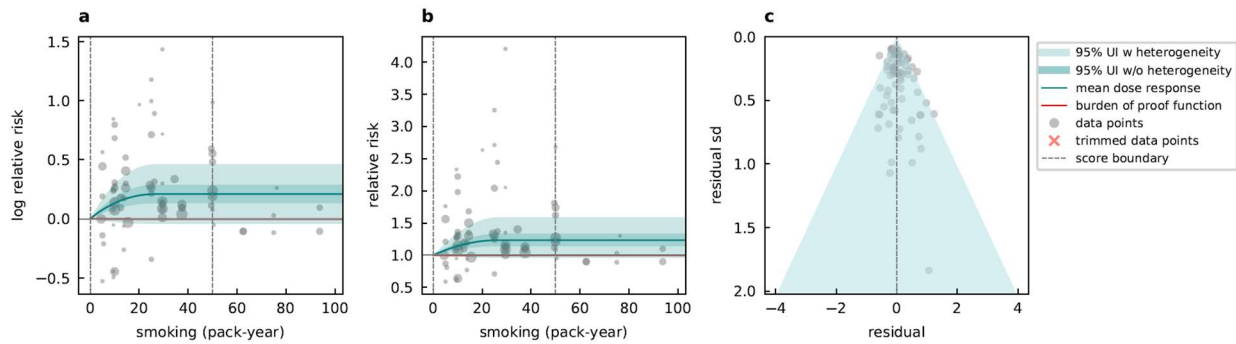

**Cervical Cancer**

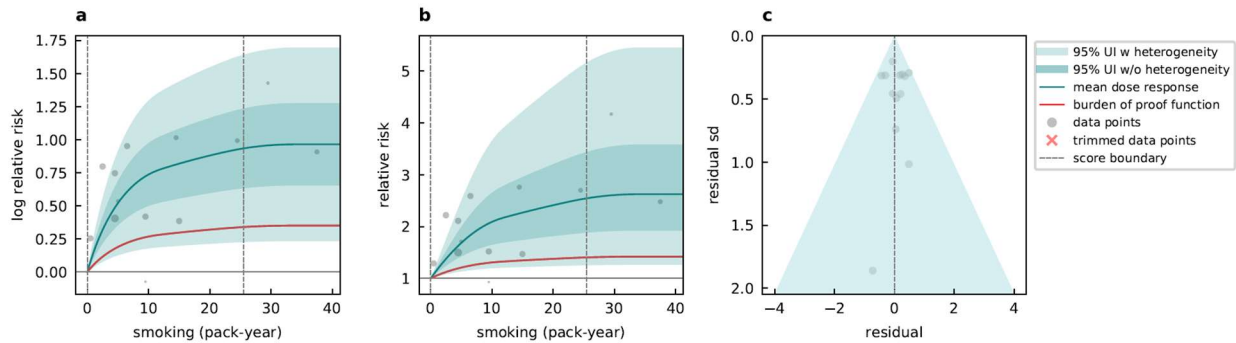

**Cataracts**

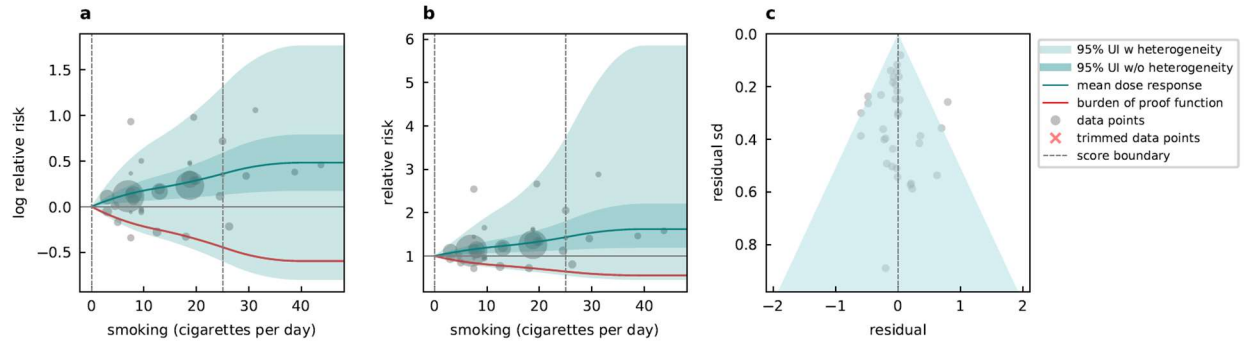

**Breast Cancer**

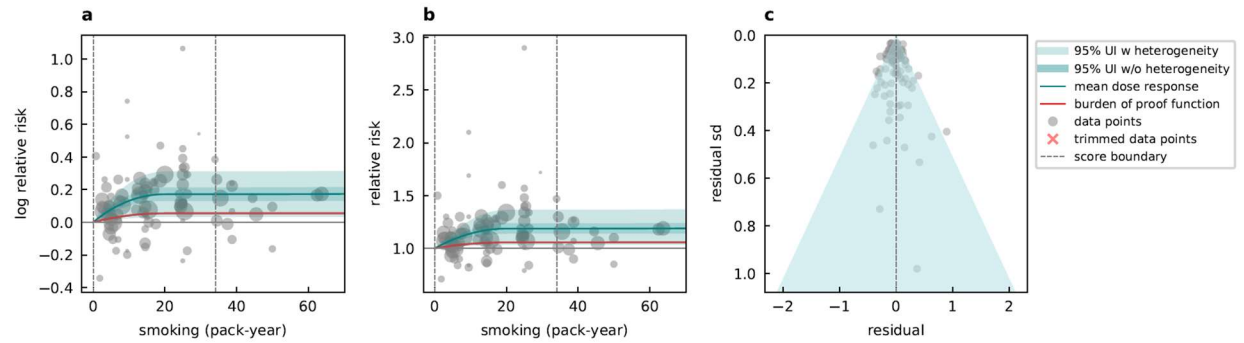

**Bladder Cancer**

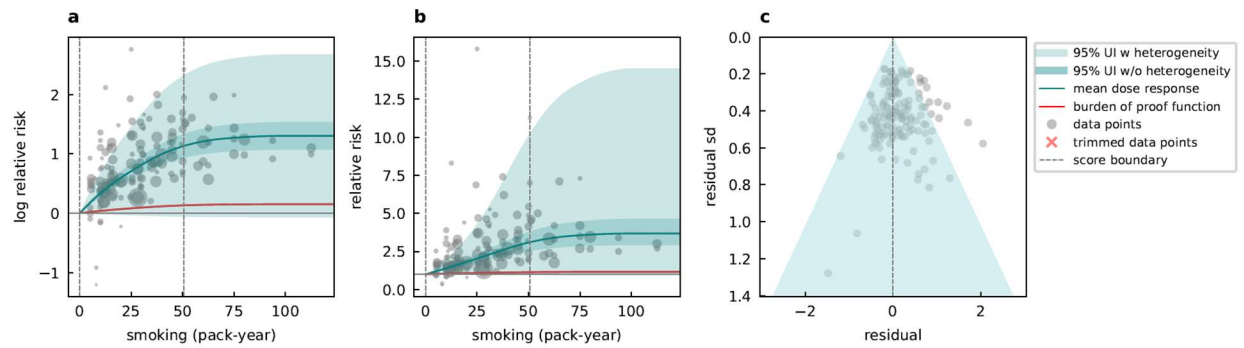

**Asthma**

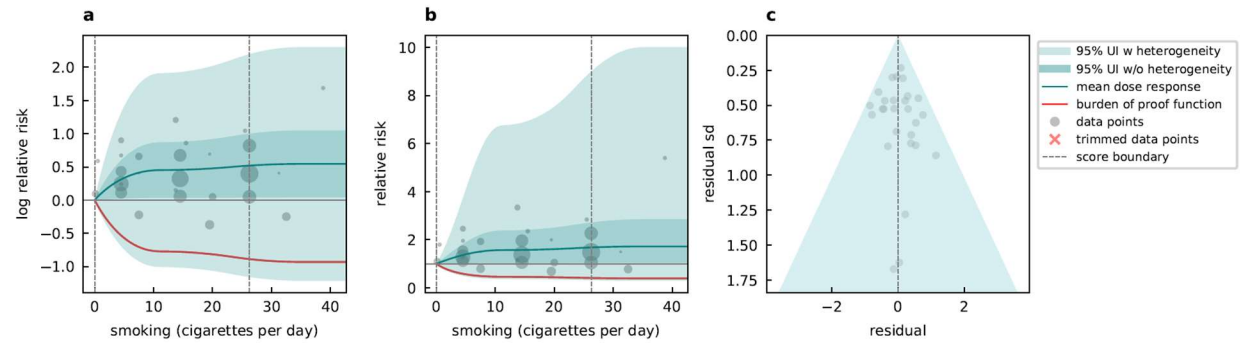

**Aortic Aneurysm**

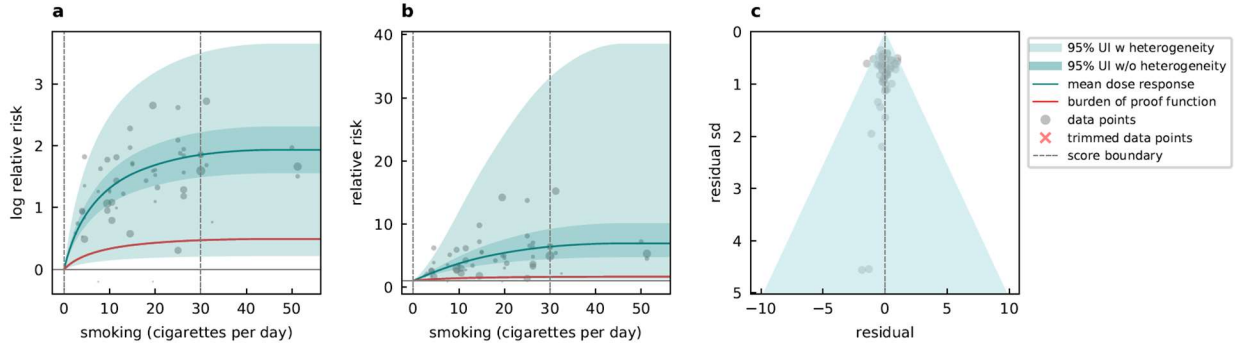

**Atrial Fibrillation and Flutter**

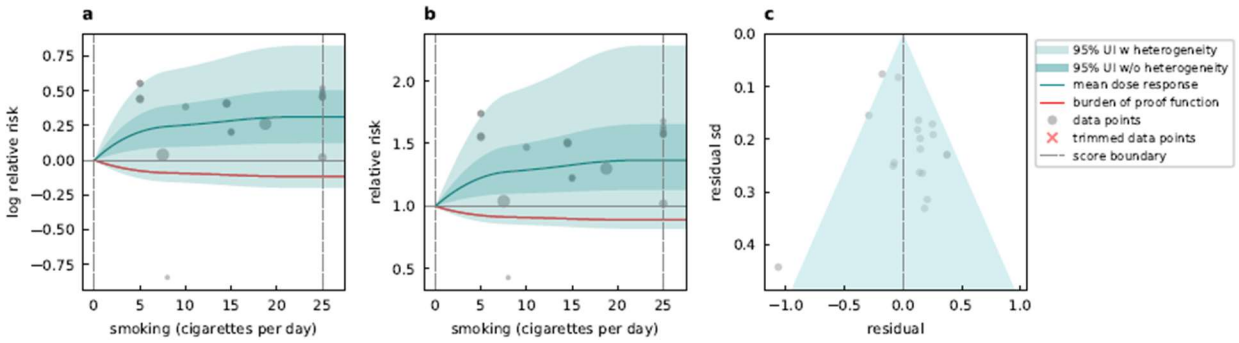

**Alzheimer's and Other Dementia**

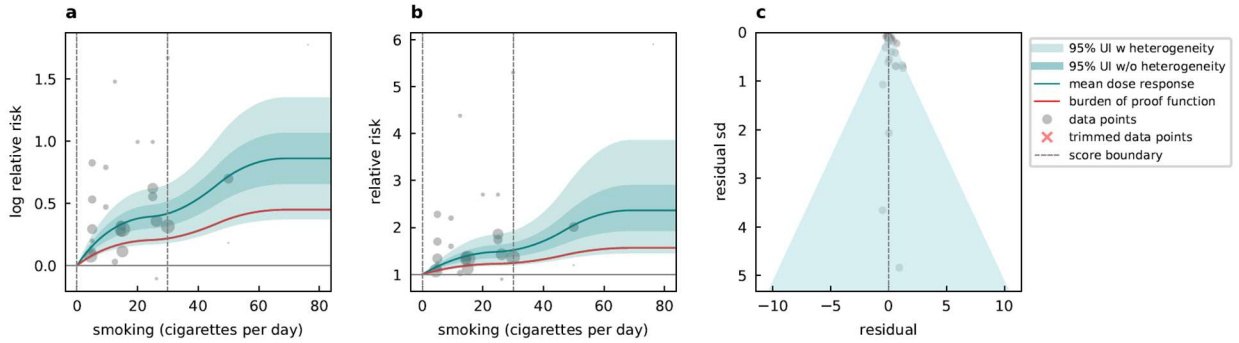

**Lung Cancer**

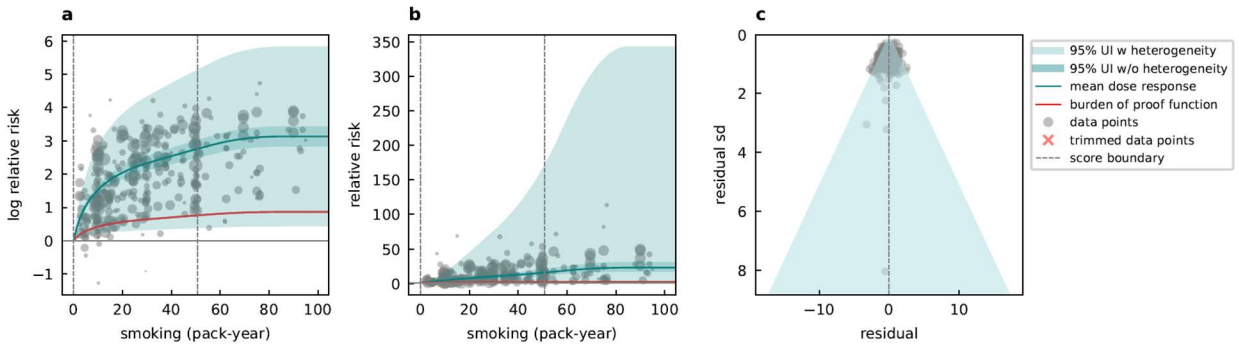

**Lower Respiratory Infections**



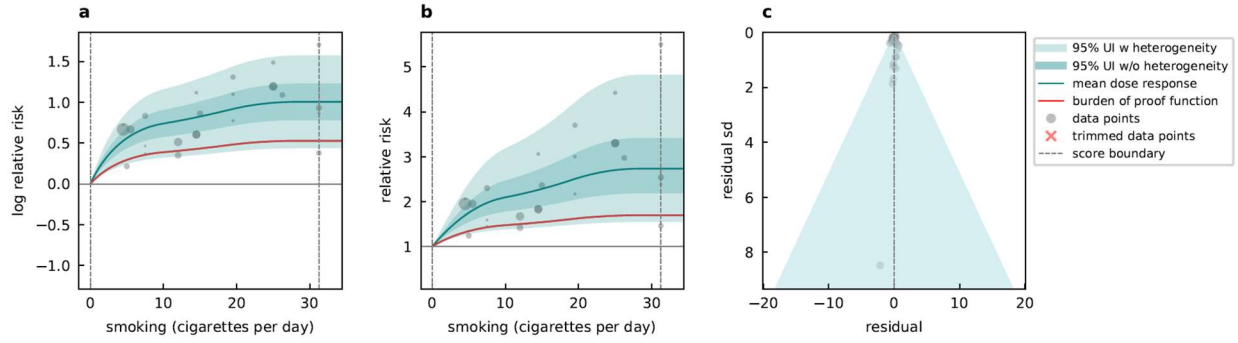

### Liver Cancer

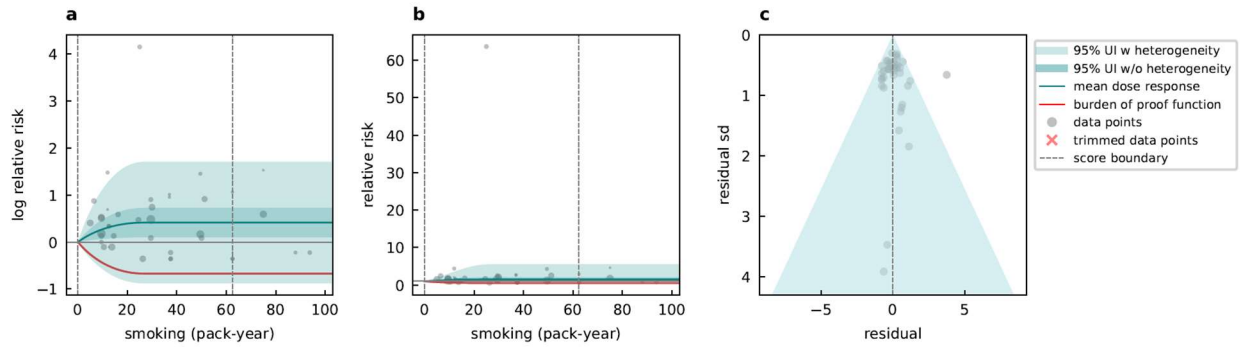

### Lip and Oral Cavity Cancer

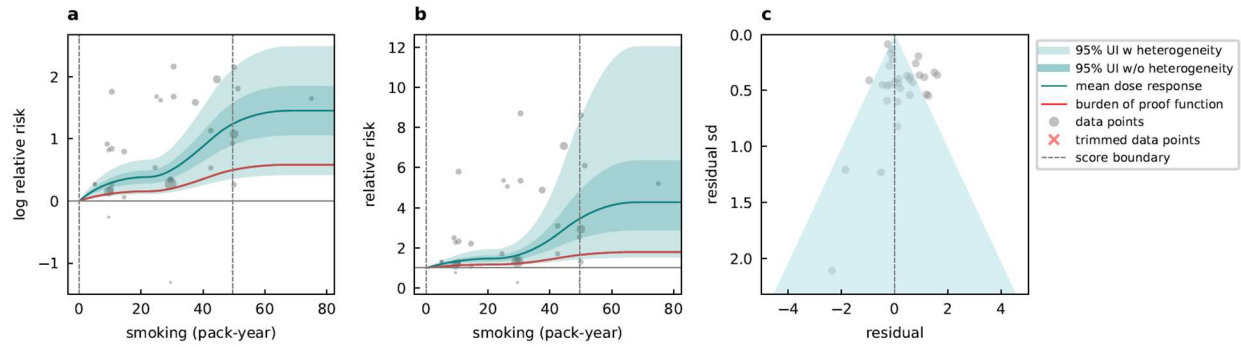

### Leukemia

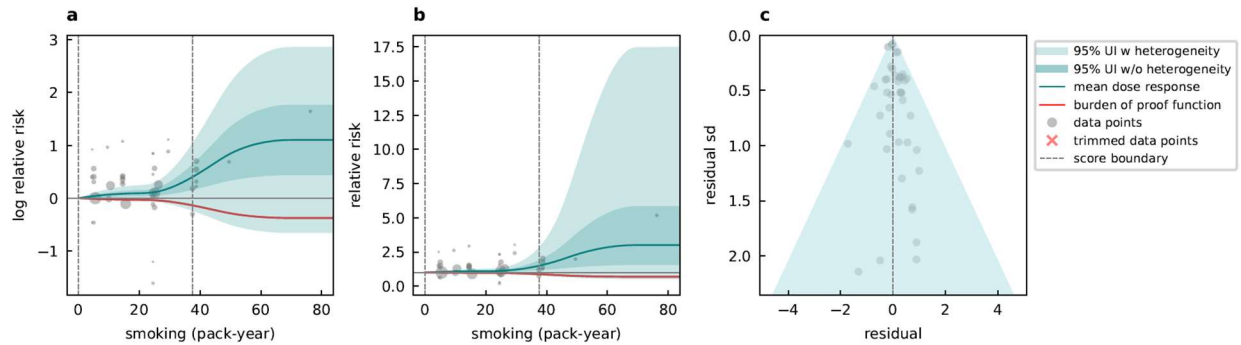

### Low Back Pain

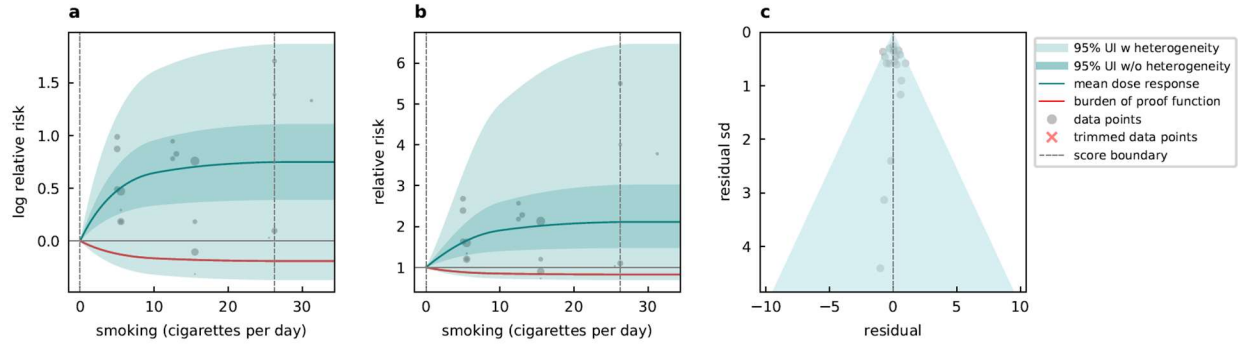

### Laryngeal Cancer

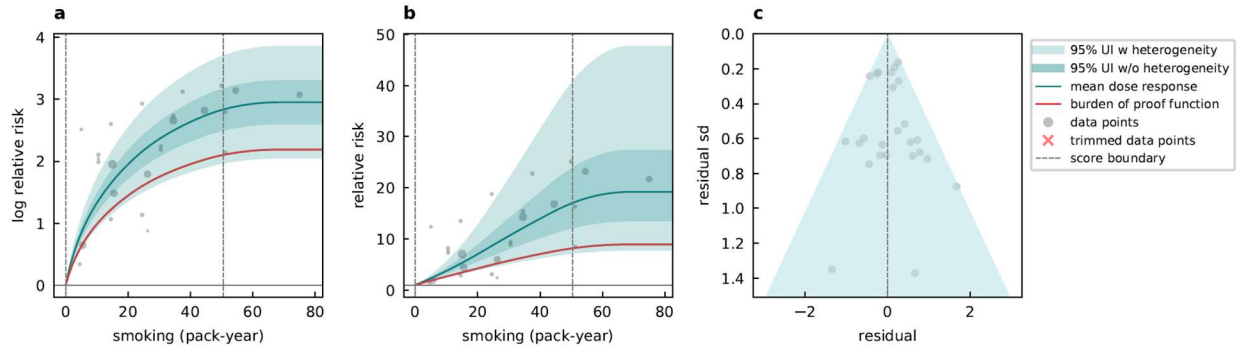

### Kidney Cancer

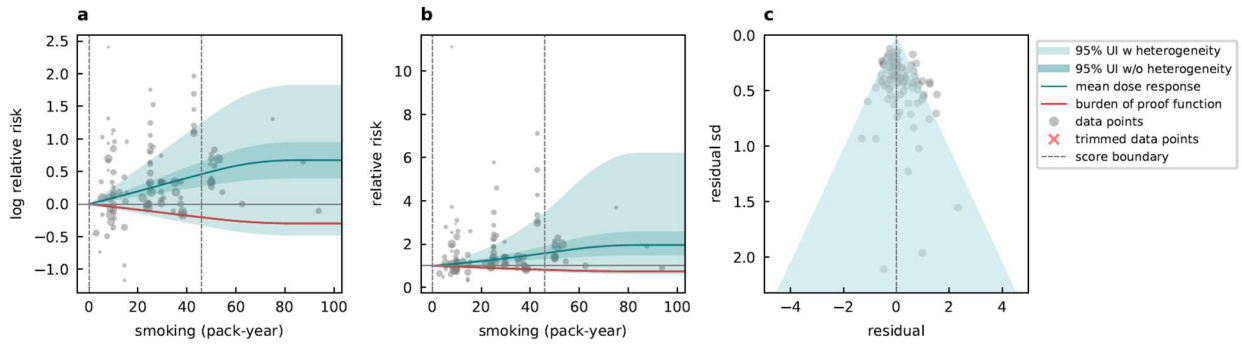

### Ischemic Heart Disease

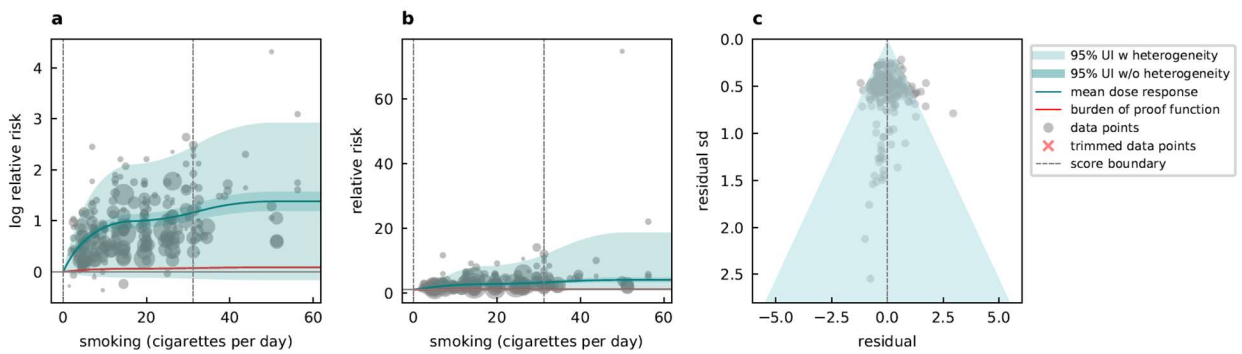

### Gallbladder Diseases

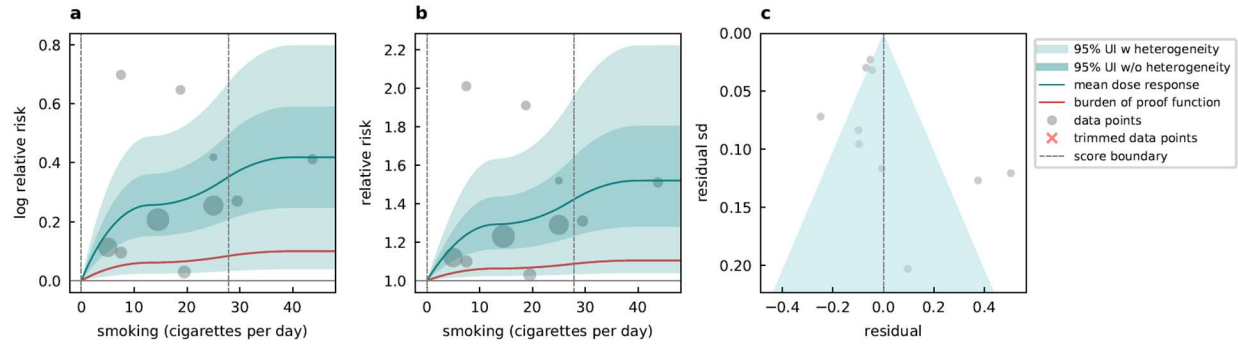

**Esophageal Cancer**

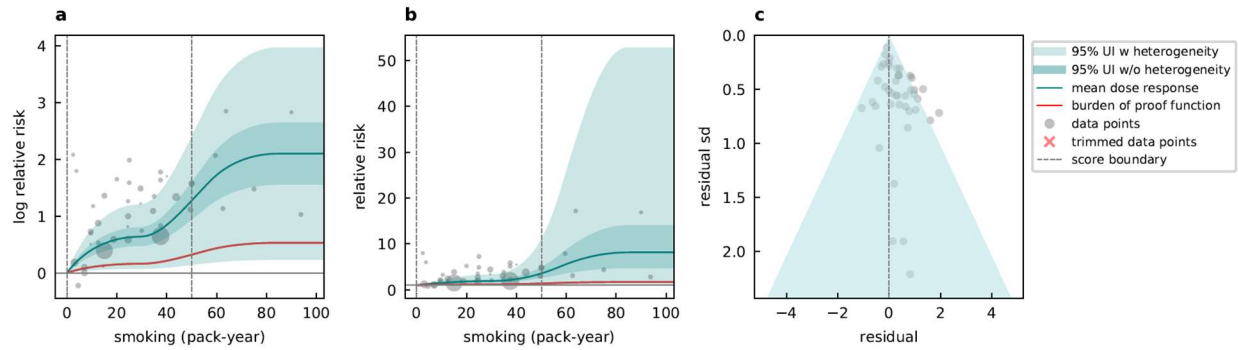

**Diabetes**

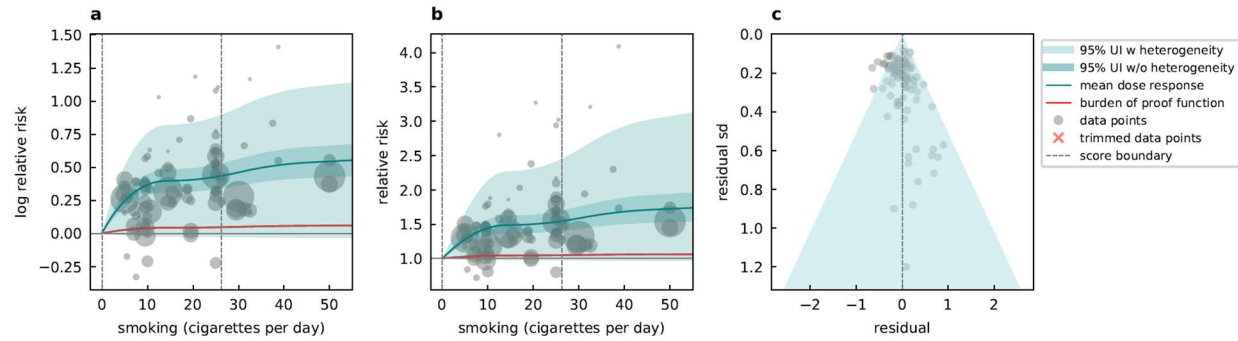

**Tuberculosis**

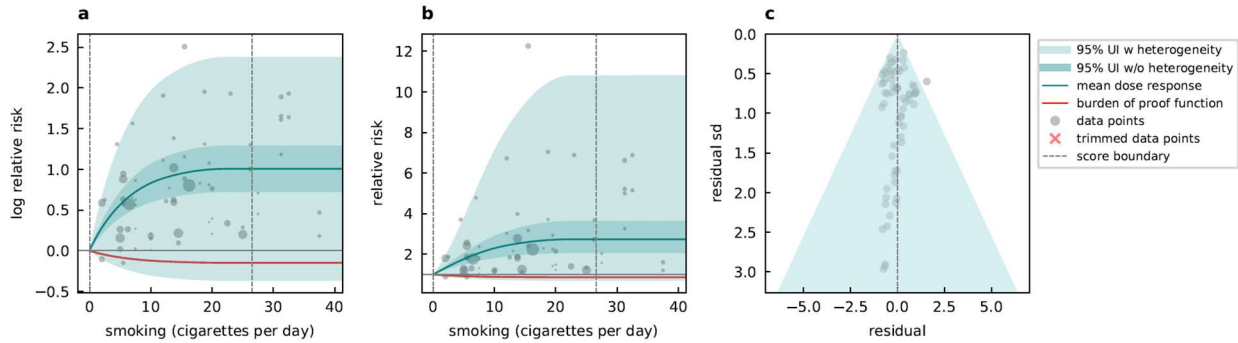

**Stroke**

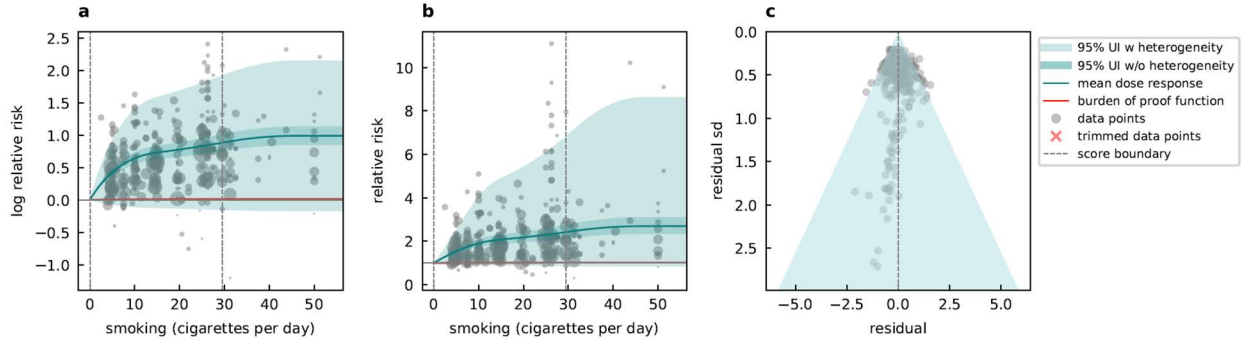

**Stomach Cancer**

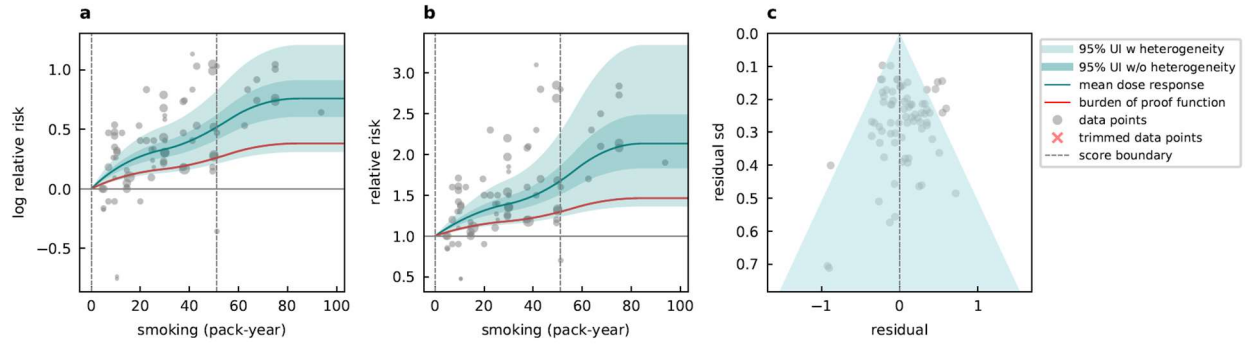

**Rheumatoid Arthritis**

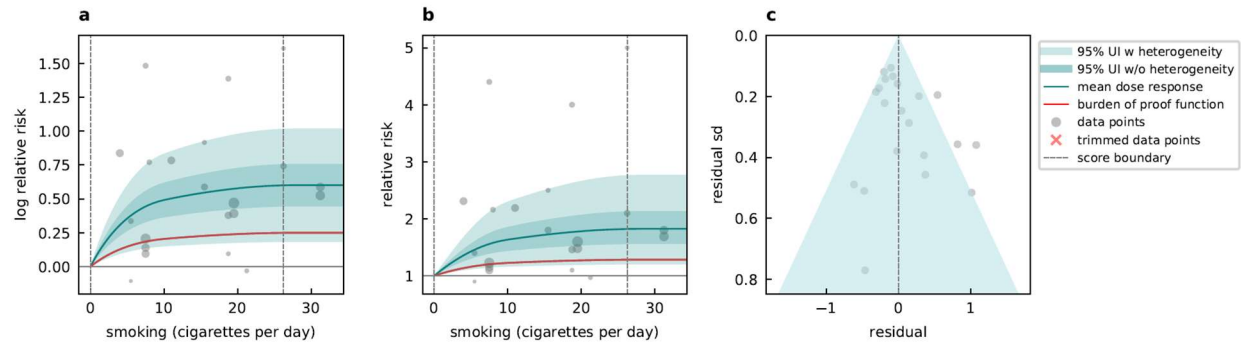

**Prostate Cancer**

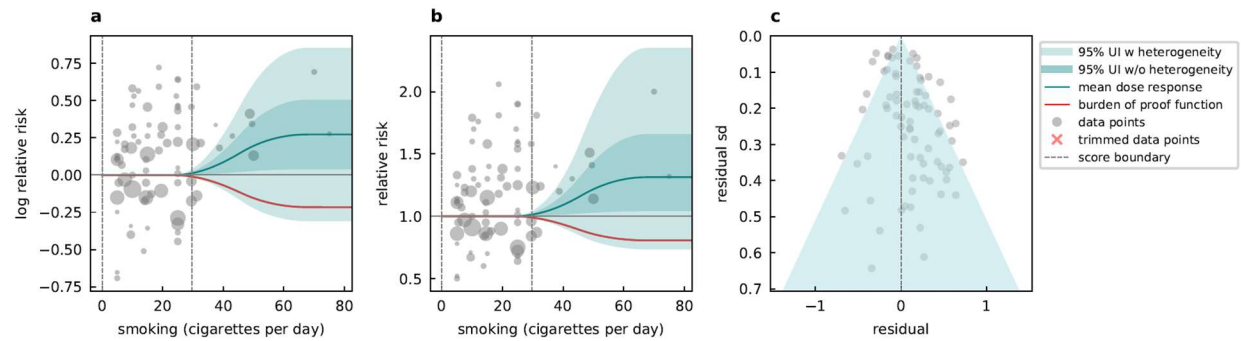

**Peripheral Artery Disease**

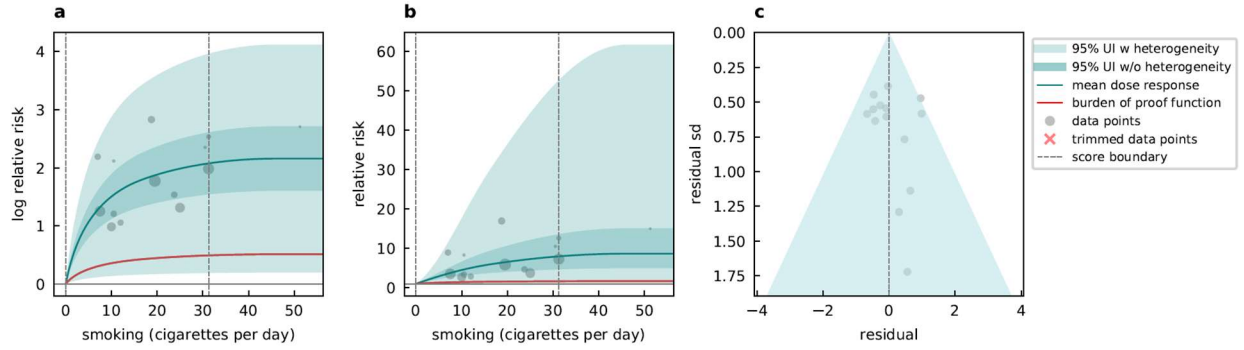

**Peptic Ulcer**

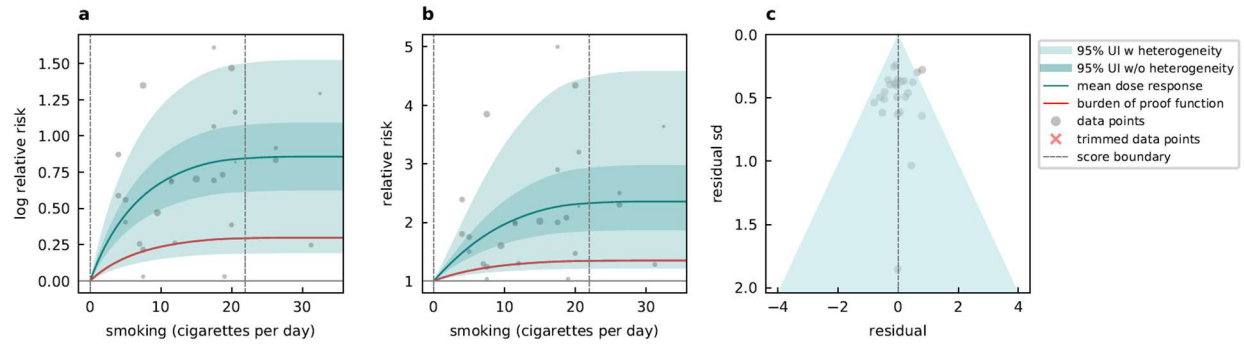

**Parkinson's Disease**

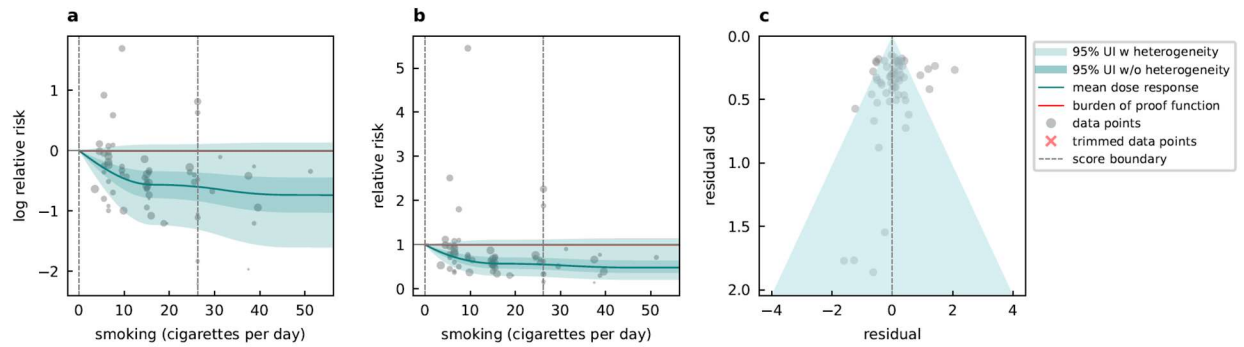

**Pancreatic Cancer**

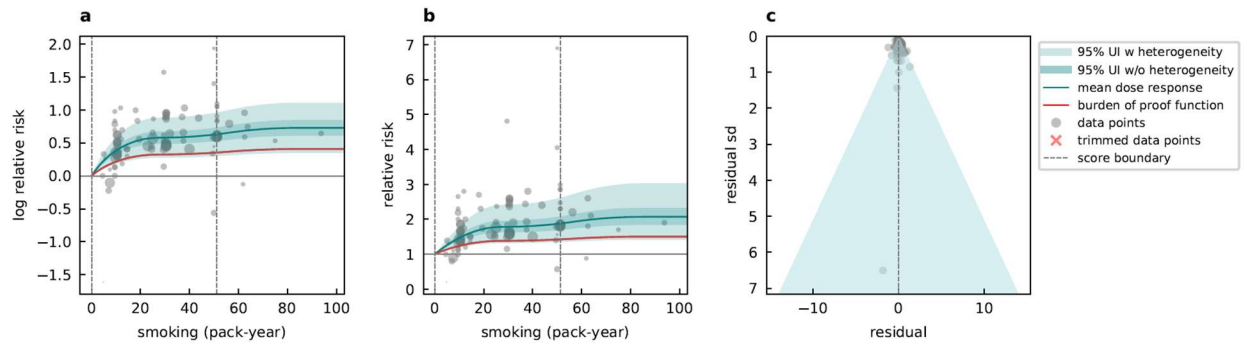

**Other Pharynx Cancer**

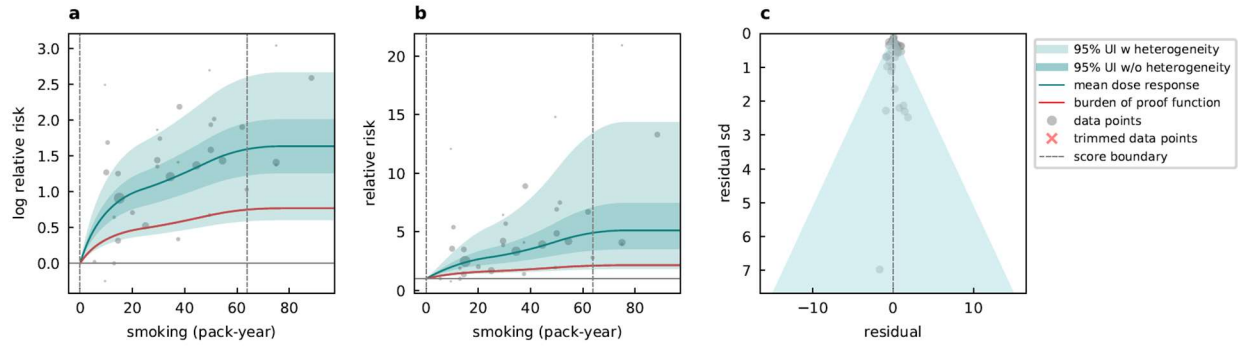

### Nasopharyngeal Cancer

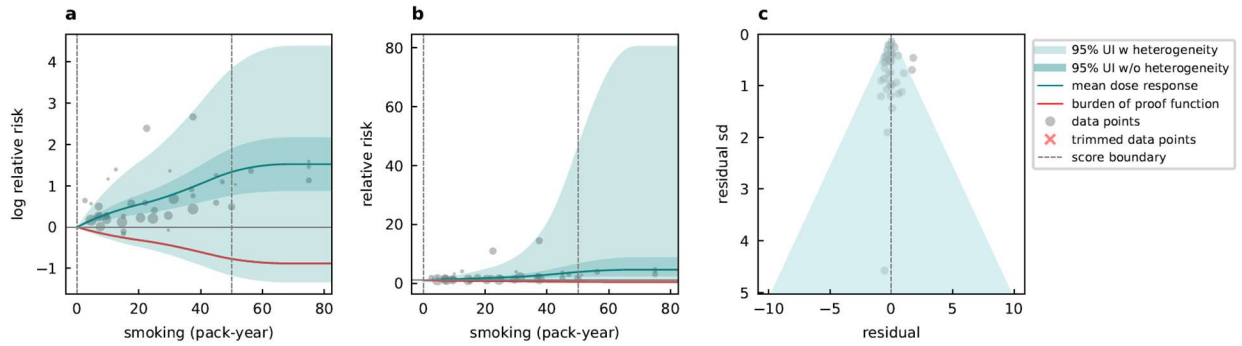

### Multiple Sclerosis

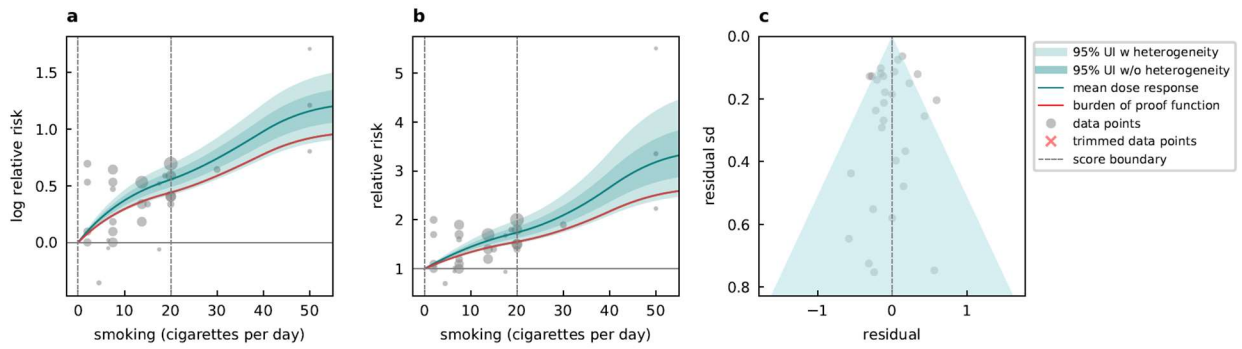

### Macular Degeneration

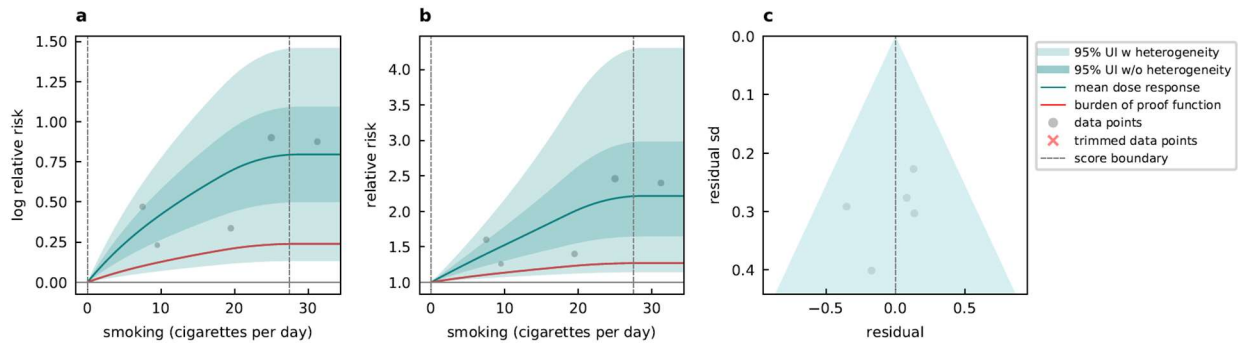

## Section 6.2: Testing sensitivity of monotonicity constraints

We examined the impact of the monotonicity constraint on the shape of the risk curves for each risk-outcome pair to evaluate the sensitivity of our final model to the use of a monotonicity constraint. This constraint ensured that the mean risk curve was non-decreasing for risk-outcome pairs where the relationship is expected to be harmful and

non-increasing for Parkinson's disease-smoking pair. A preliminary model was run with the same inputs and model specifications as the final models but without the monotonicity constraint, and the results were compared to those of the final models. These results can be found below.

**Figure 6: Results of model without monotonicity constraints**

The figures below reflect the results of the model without monotonicity constraints using the final model specifications for every risk-outcome pair. The first of each set of outcome plots presents the dose-response relative risk in log space, while the middle figure is the dose-response relative risk in linear space. The right-most figure reflects the residual cone for all of the data inputs in the risk-outcome pair. The reference exposure for all of these risk curves is the theoretical minimum risk exposure level, 0 cigarettes per day or 0 pack-years (depending on the outcome in question).

**COPD**

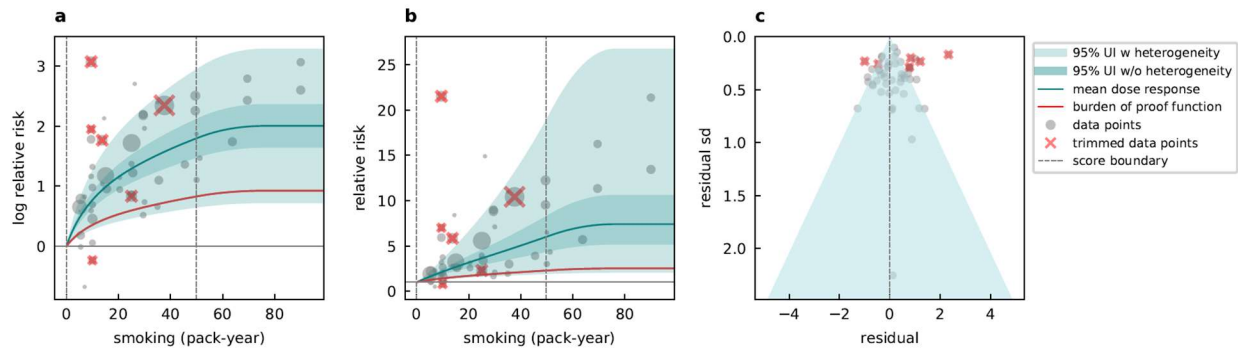

**Colon and Rectum Cancer**

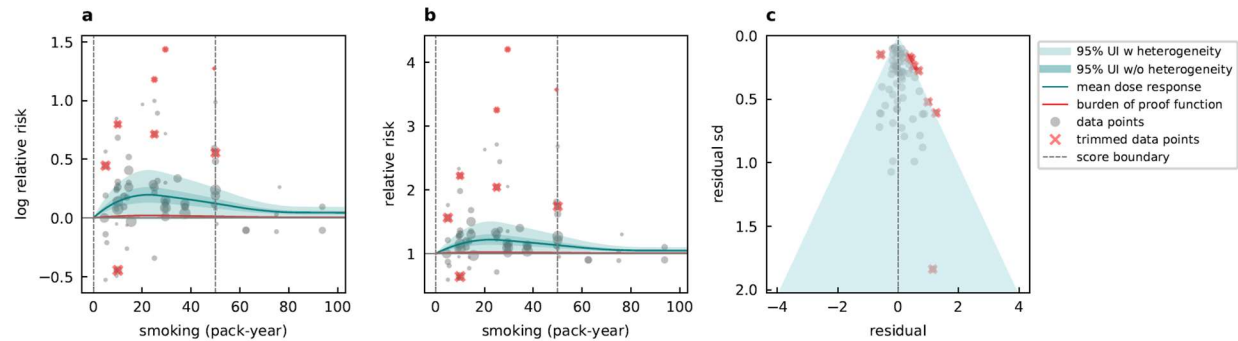

**Cervical Cancer**

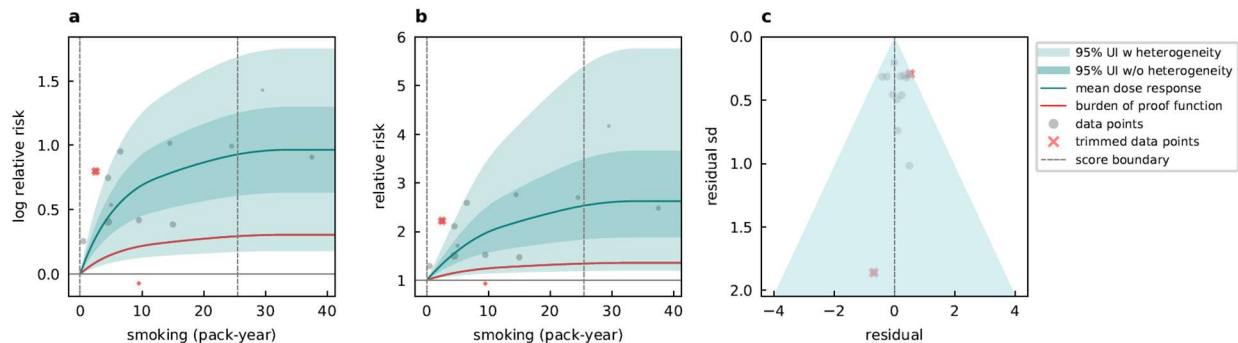

**Cataracts**

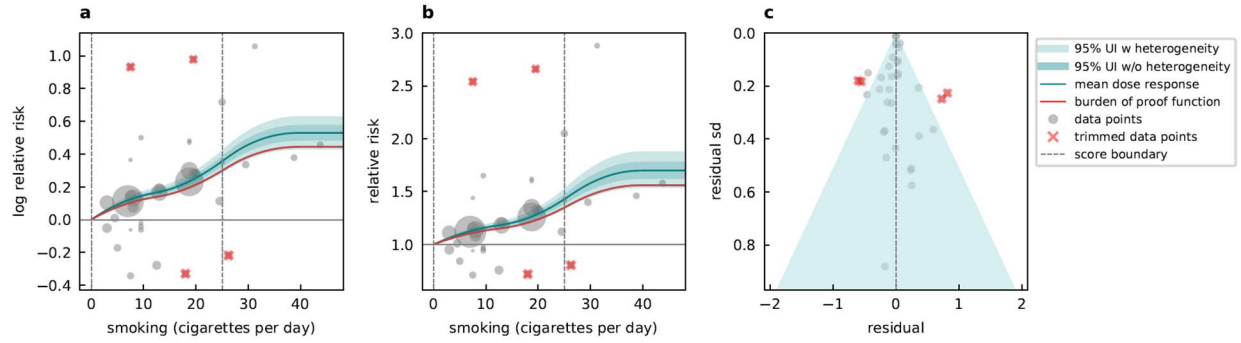

### Breast Cancer

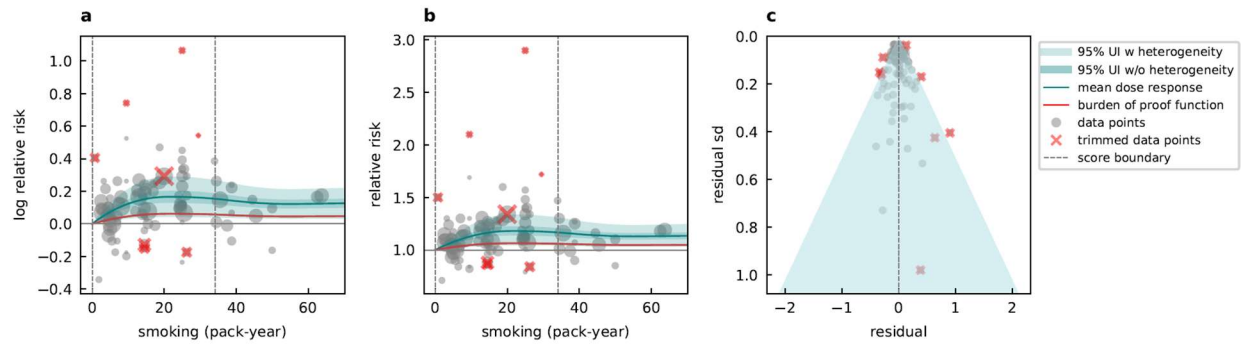

### Bladder Cancer

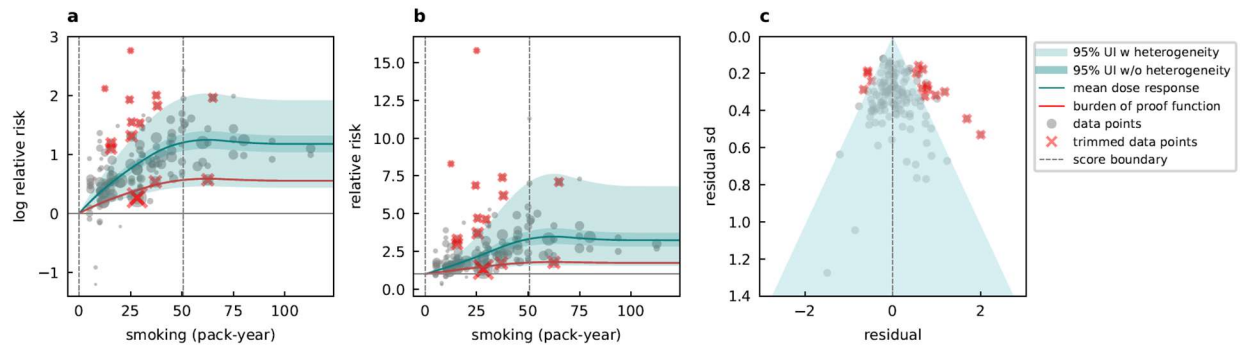

### Asthma

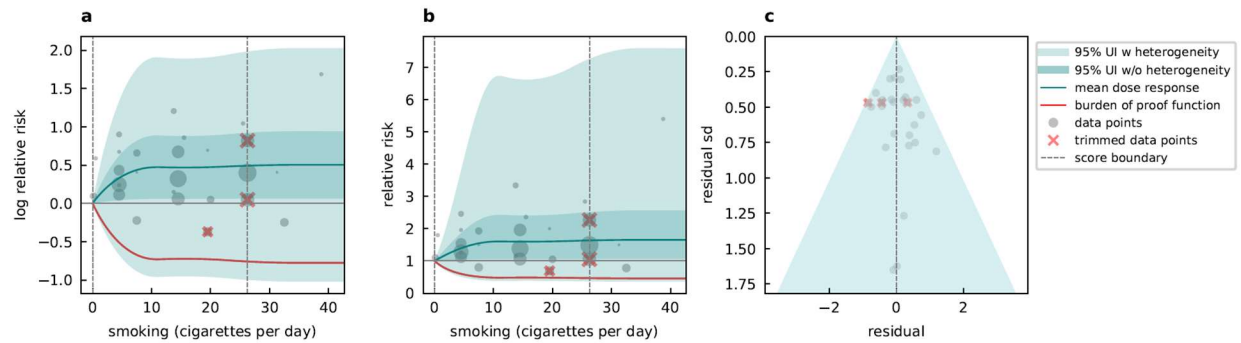

### Aortic Aneurysm



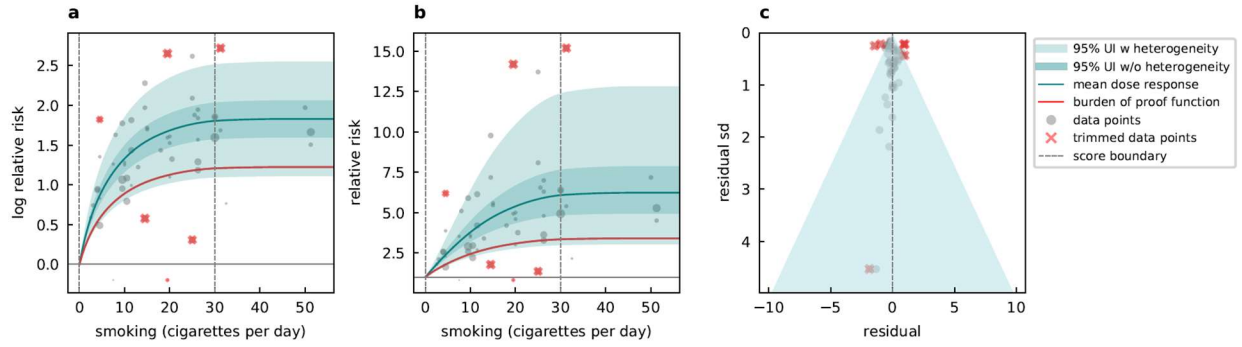

### Atrial Fibrillation and Flutter

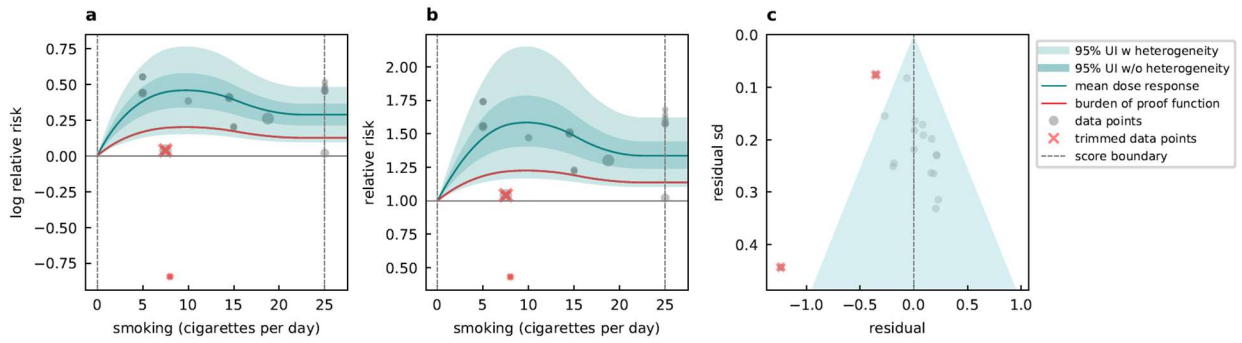

### Alzheimer's and Other Dementia

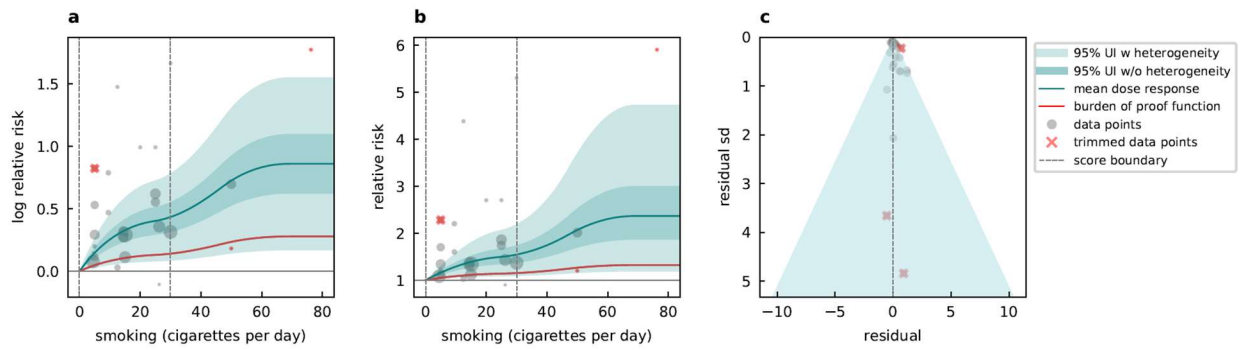

### Lung Cancer

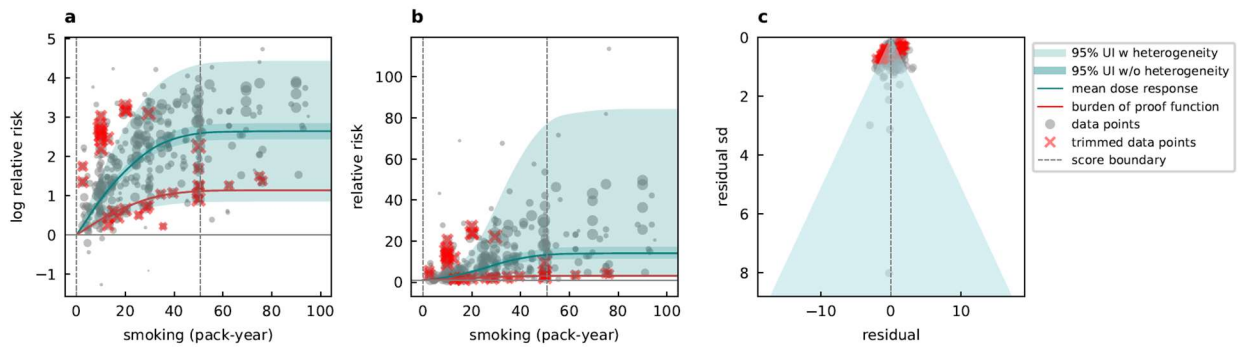

### Lower Respiratory Infections

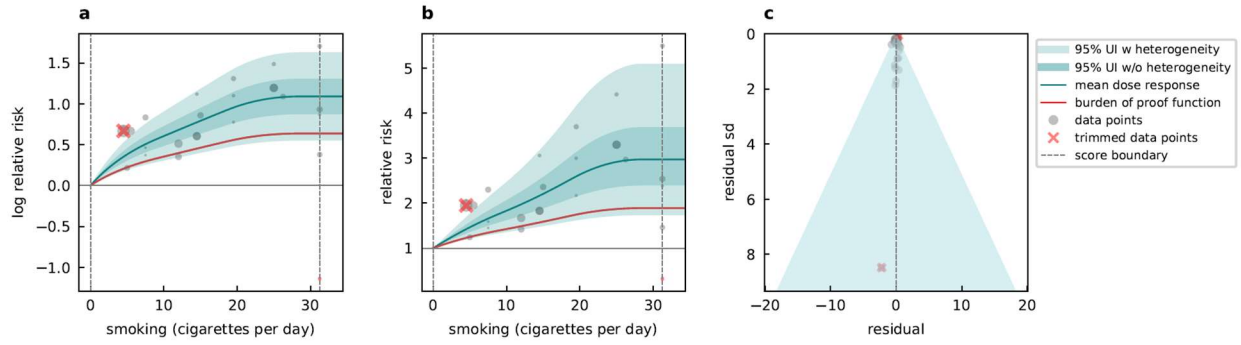

### Liver Cancer

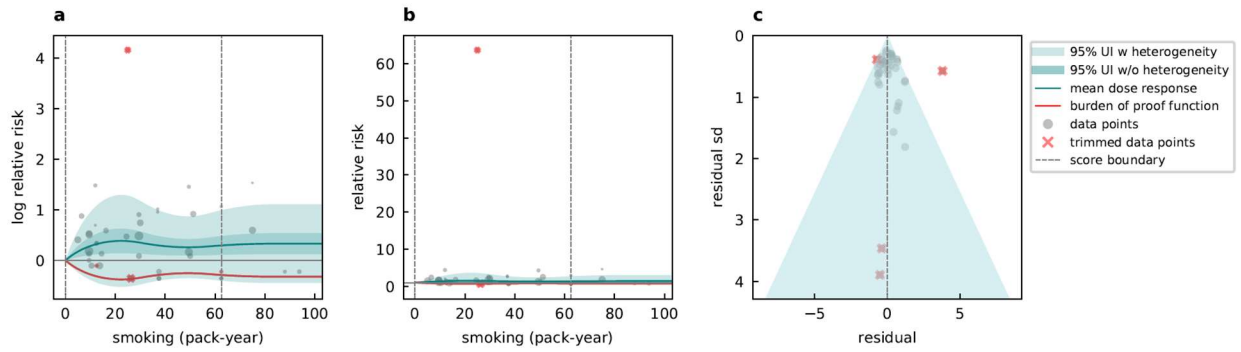

### Lip and Oral Cavity Cancer

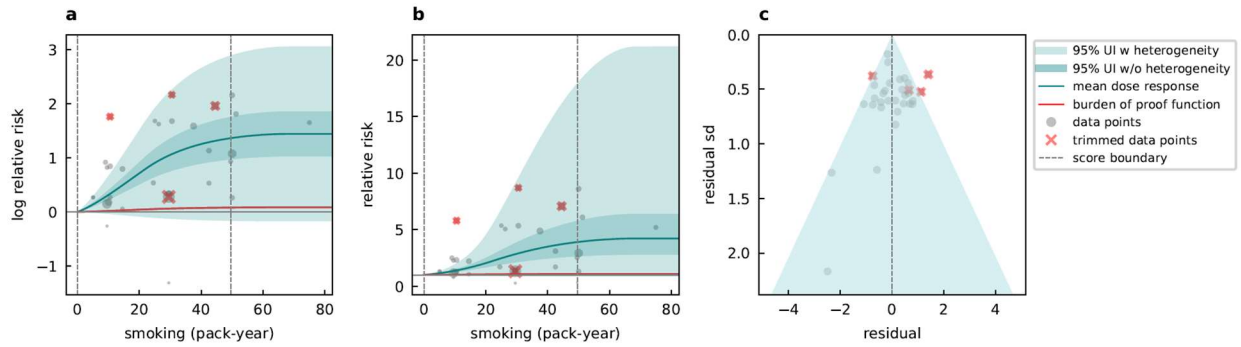

### Leukemia

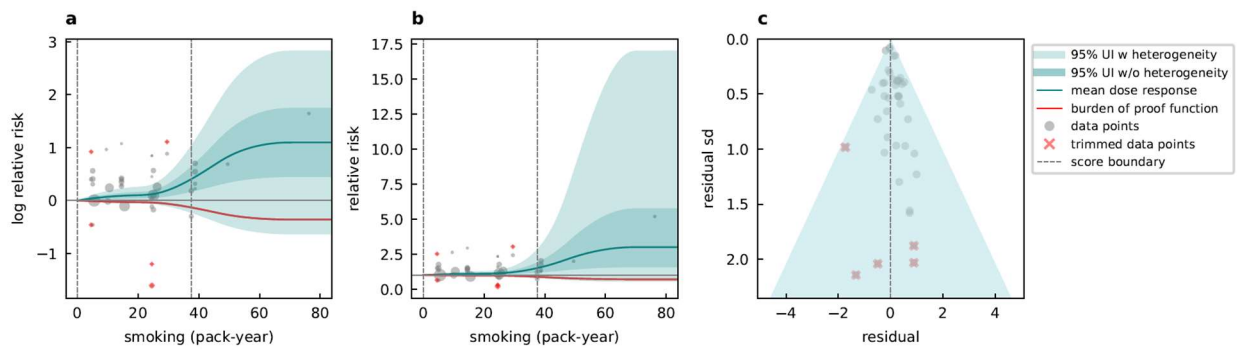

### Low Back Pain

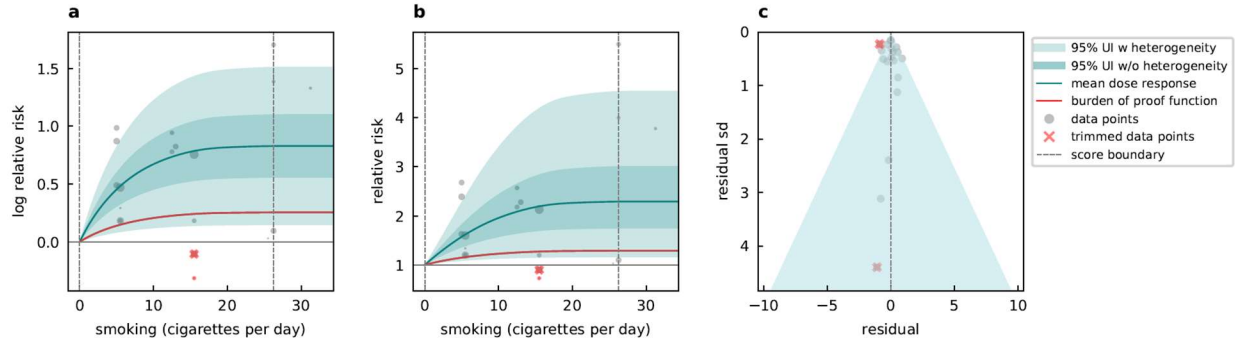

### Laryngeal Cancer

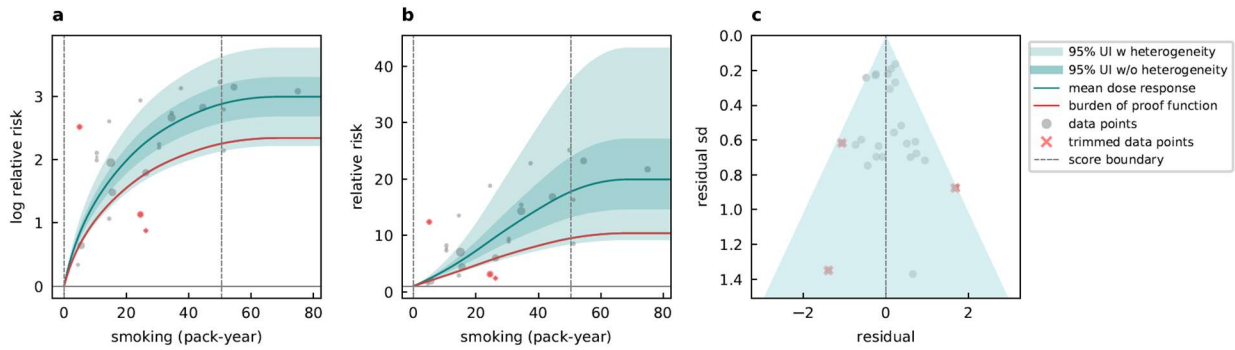

### Kidney Cancer

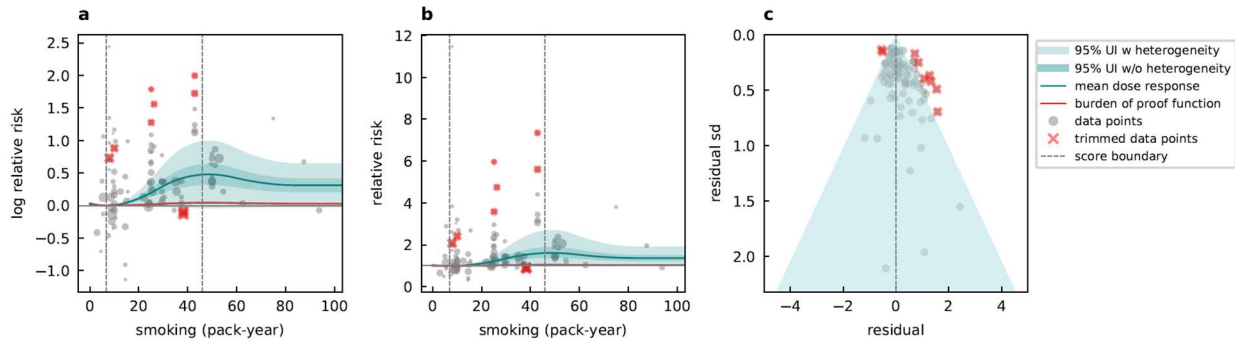

### Ischemic Heart Disease

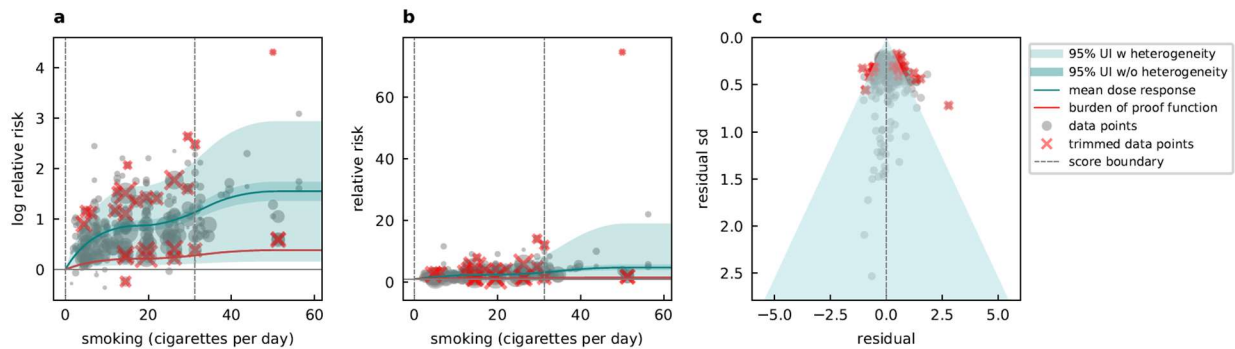

### Gallbladder Diseases

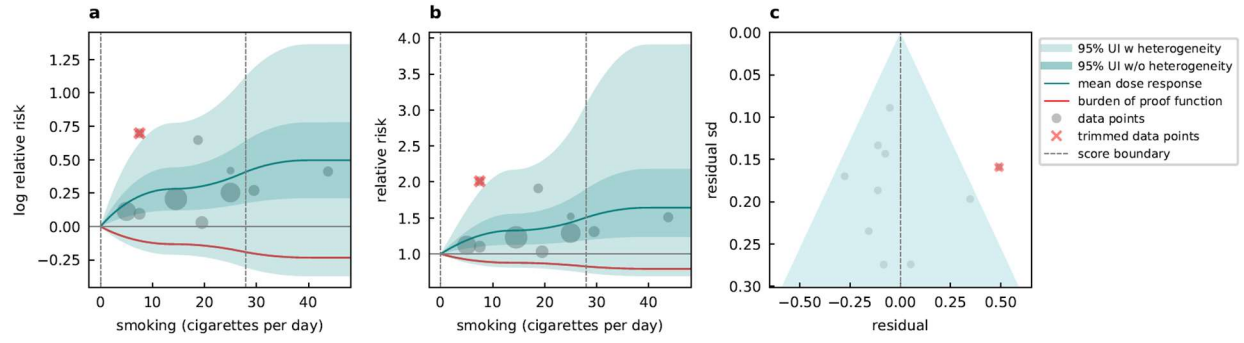

### Esophageal Cancer

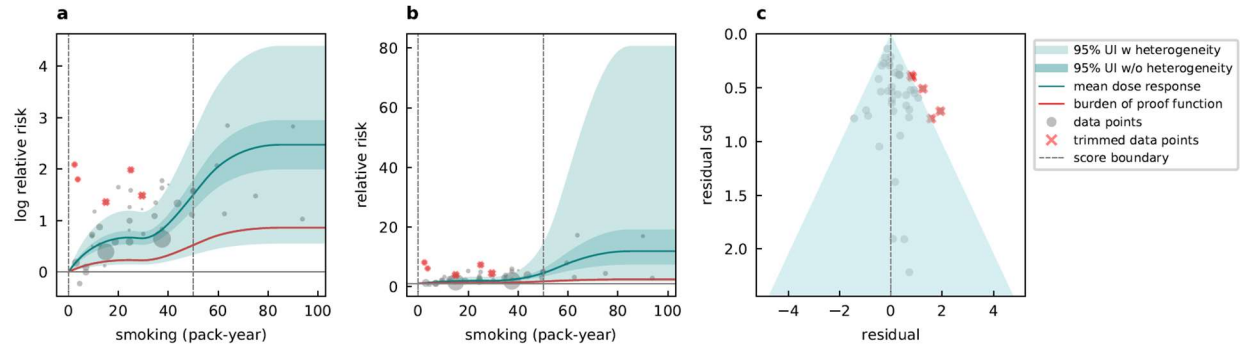

### Diabetes

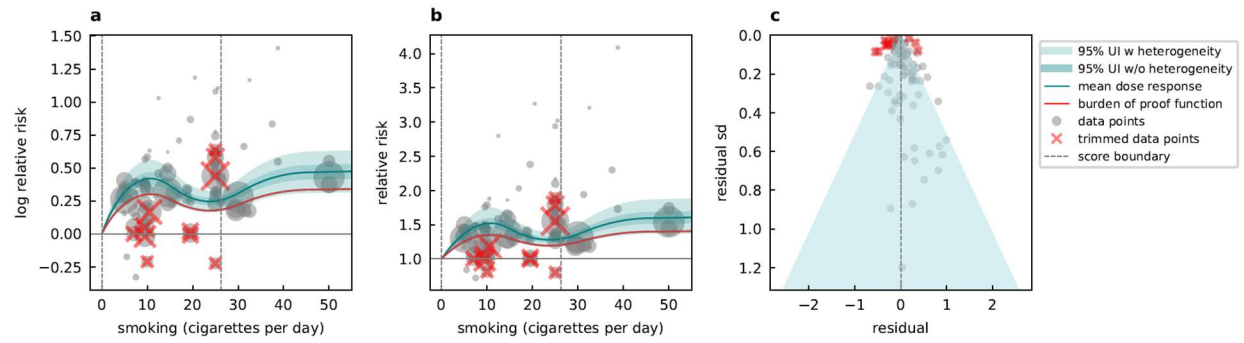

### Tuberculosis

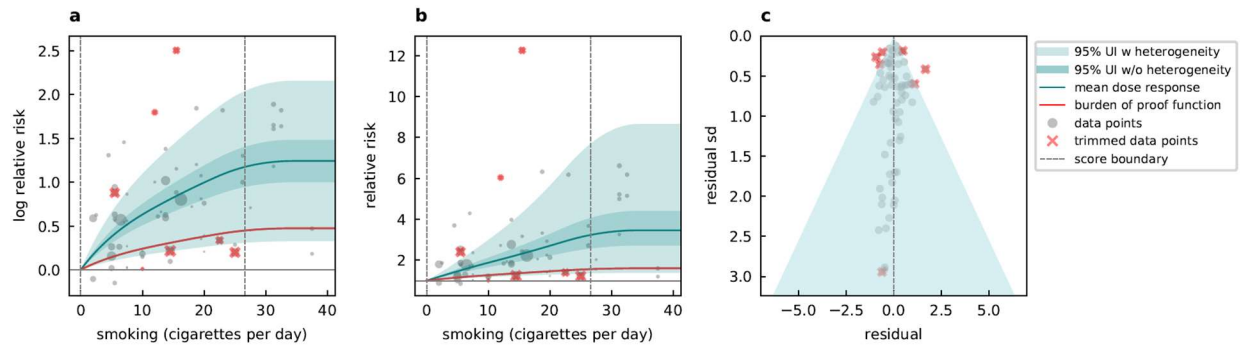

### Stroke

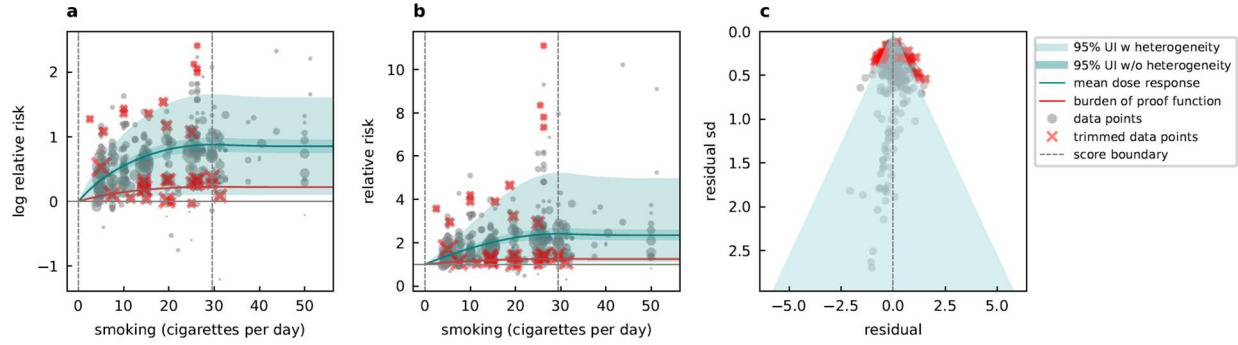

**Stomach Cancer**

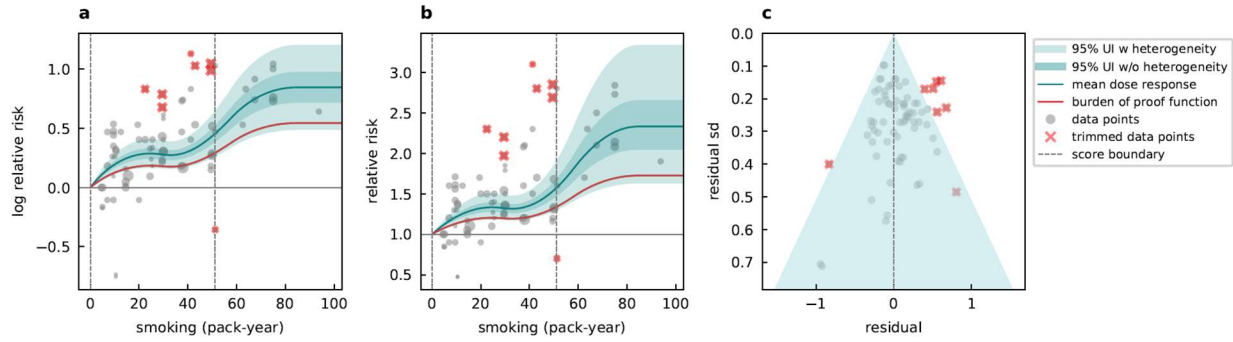

**Rheumatoid Arthritis**

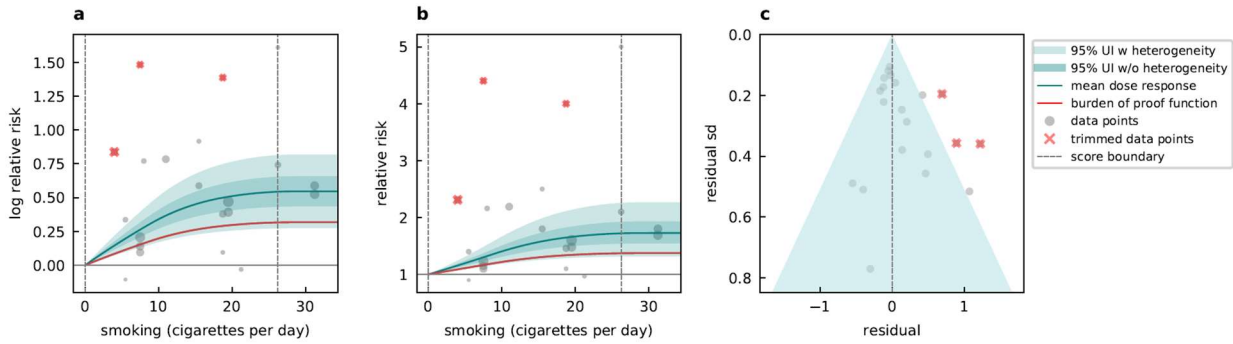

**Prostate Cancer**

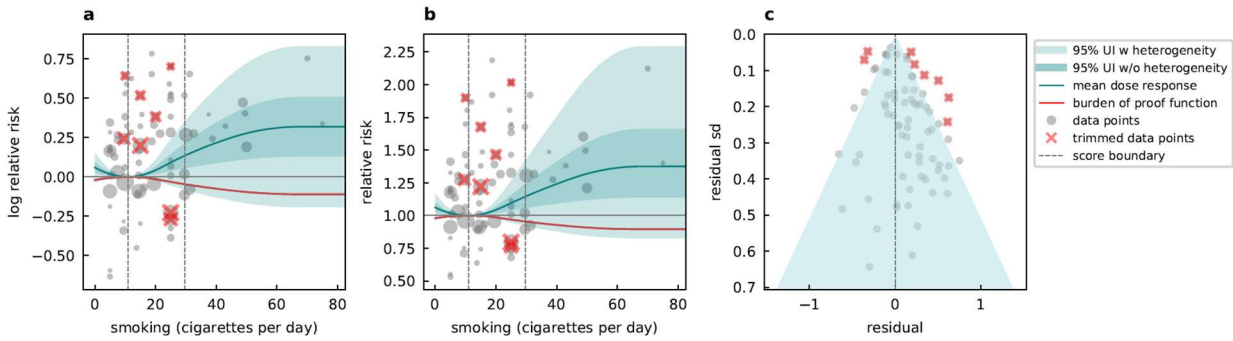

**Peripheral Artery Disease**

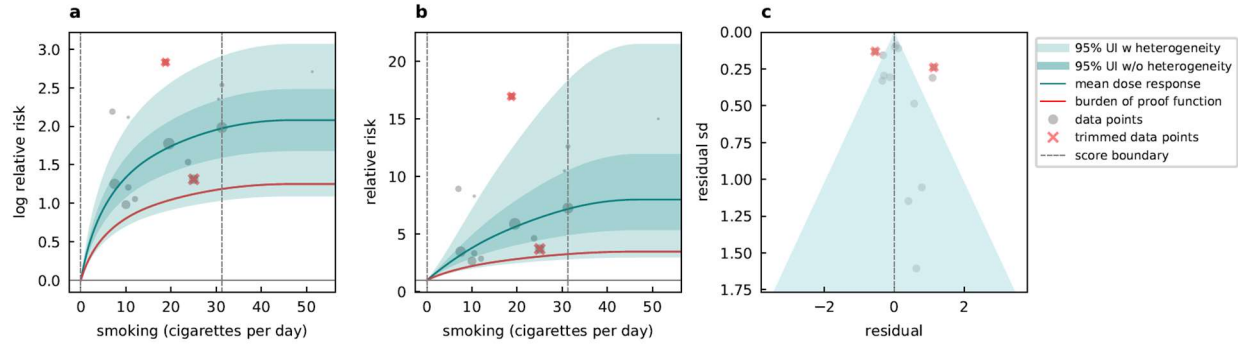

**Peptic Ulcer**

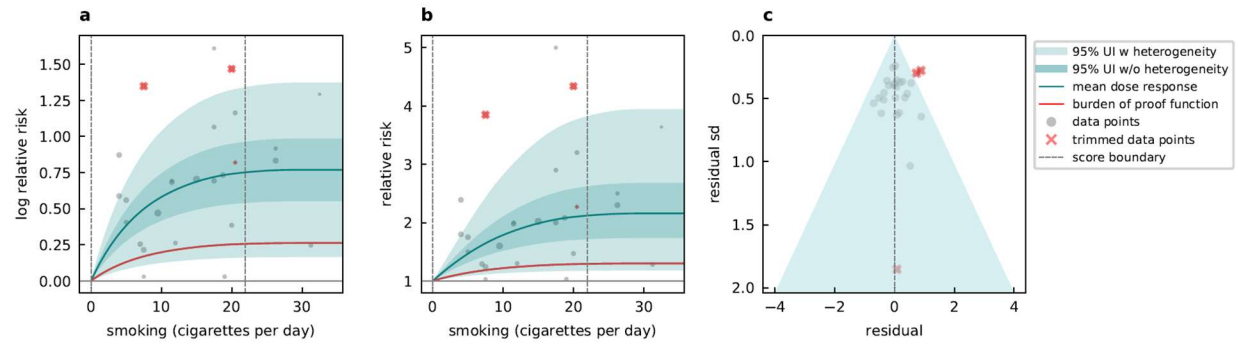

**Parkinson's Disease**

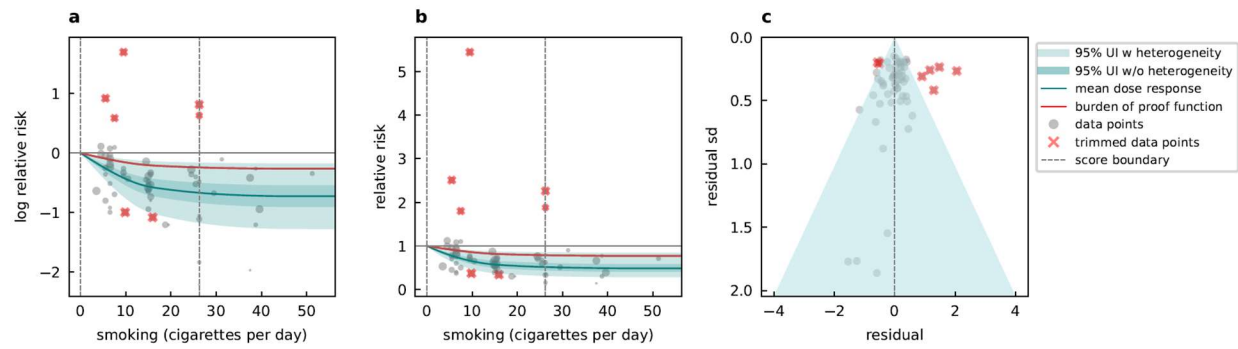

**Pancreatic Cancer**

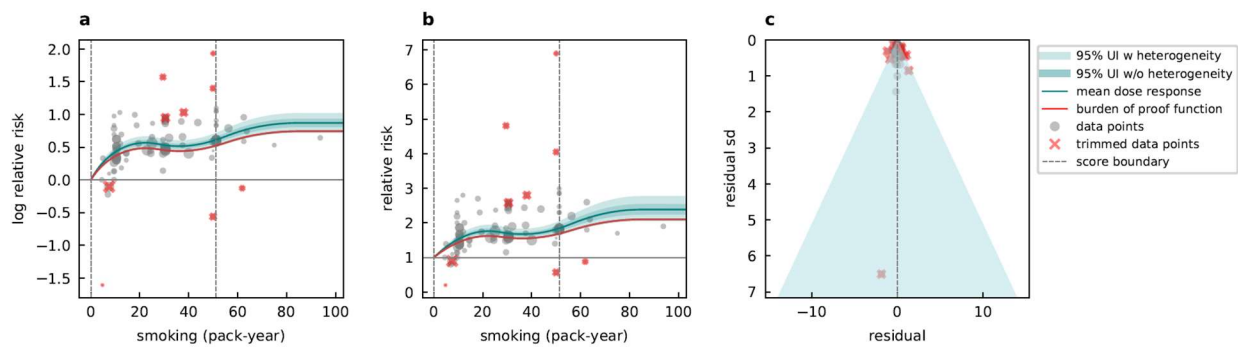

**Other Pharynx Cancer**

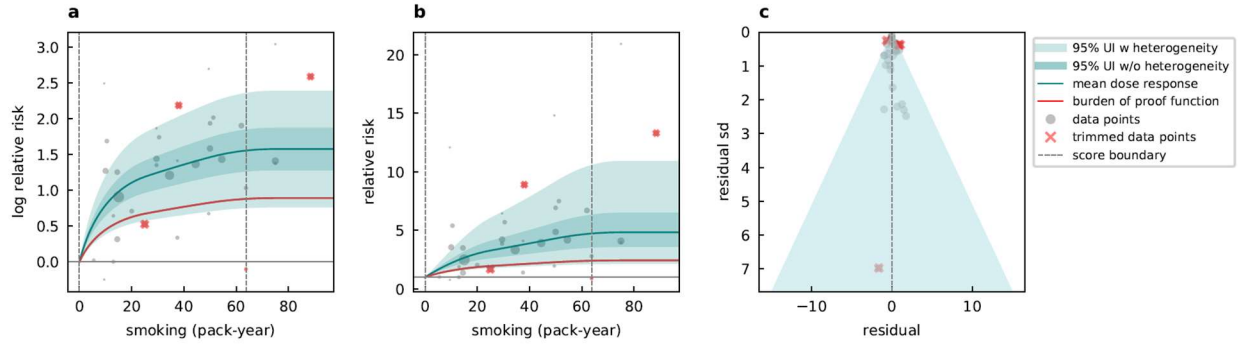

### Nasopharyngeal Cancer

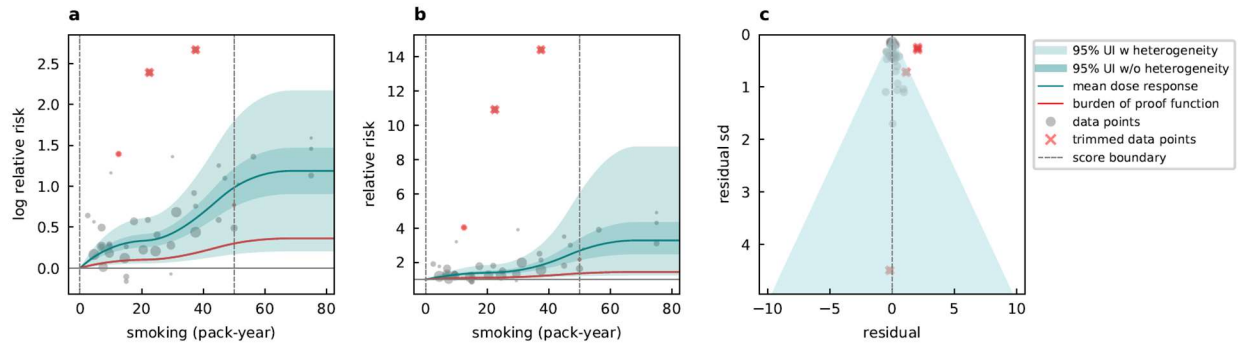

### Multiple Sclerosis

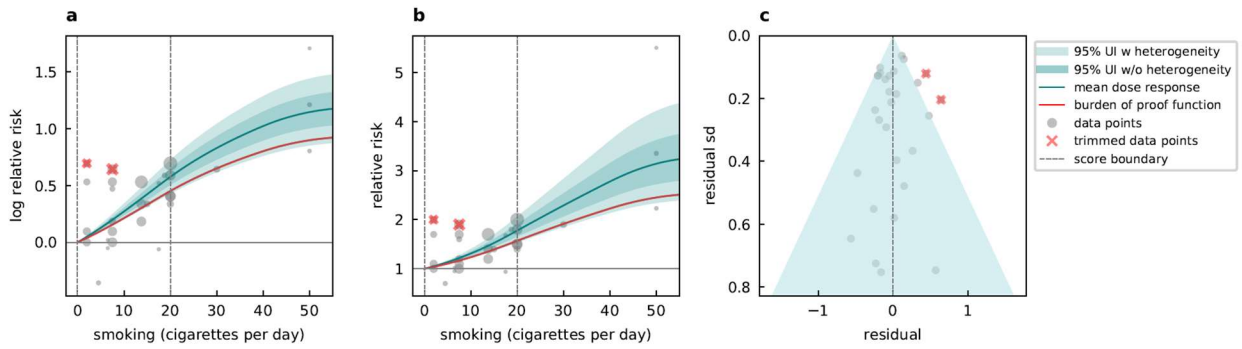

### Macular Degeneration

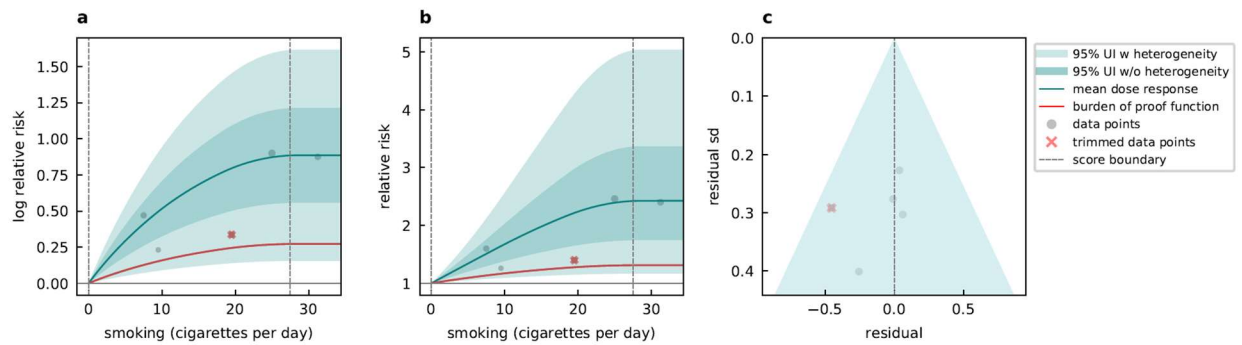

Section 7: Binary smoking-outcome pair (i.e., smoking-fracture)

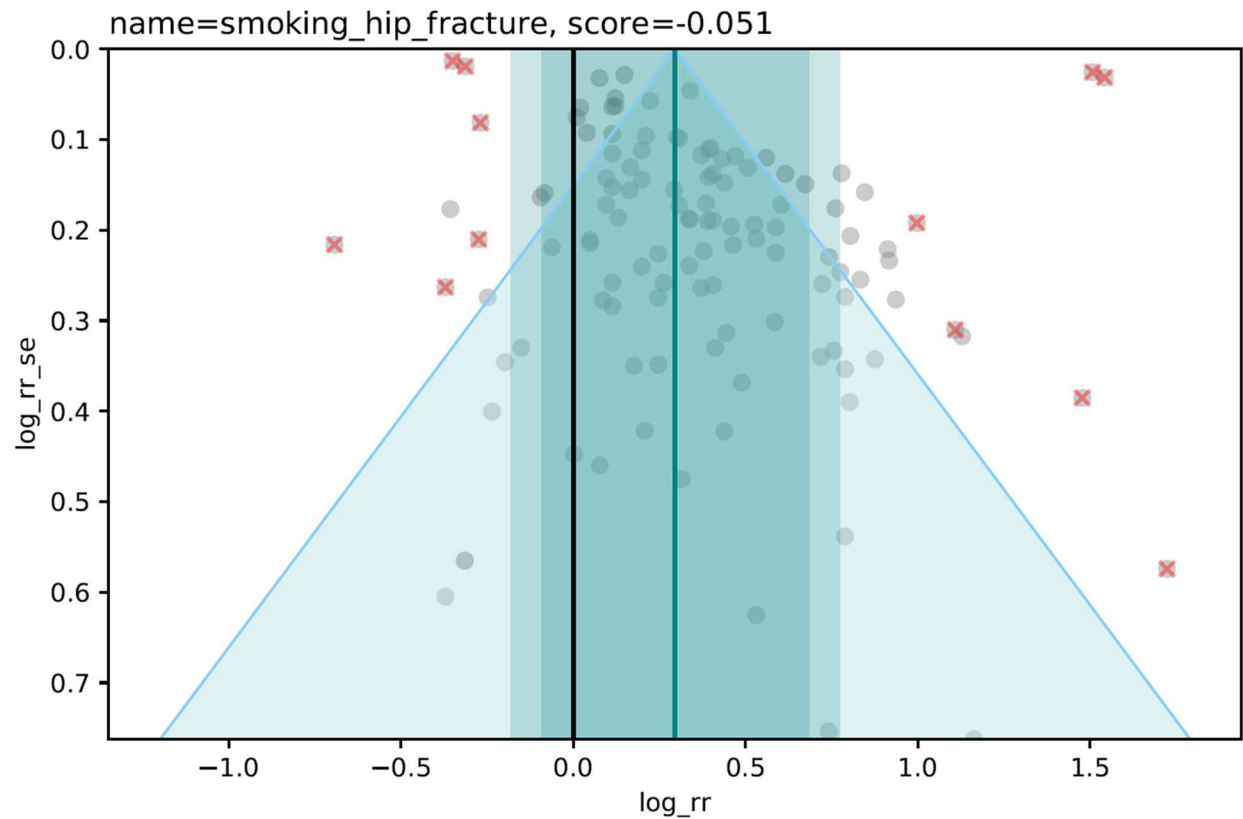

Figure 7: Natural log of relative risk of smoking (current smoker vs. never-smoker) on fracture.

*Note: This is a funnel plot that shows the natural log of relative risk on the x-axis and the estimated standard error (SE) of natural log of relative risk that includes both reported SE and between-study heterogeneity on the y-axis. Outliers are denoted using red x marks in the plot. The light green and dark green shade areas represent the 95% confidence intervals of the mean natural log of risk accounting for and not accounting for between study heterogeneity, respectively.*



number of observations: 118  
 number of covariates : 4  
 number of studies : 59  
 covariates: cv\_subpopulation, cv\_risk\_measure, cv\_adj\_L2  
 exp(beta): 1.344 gamma: 0.0315058218632591

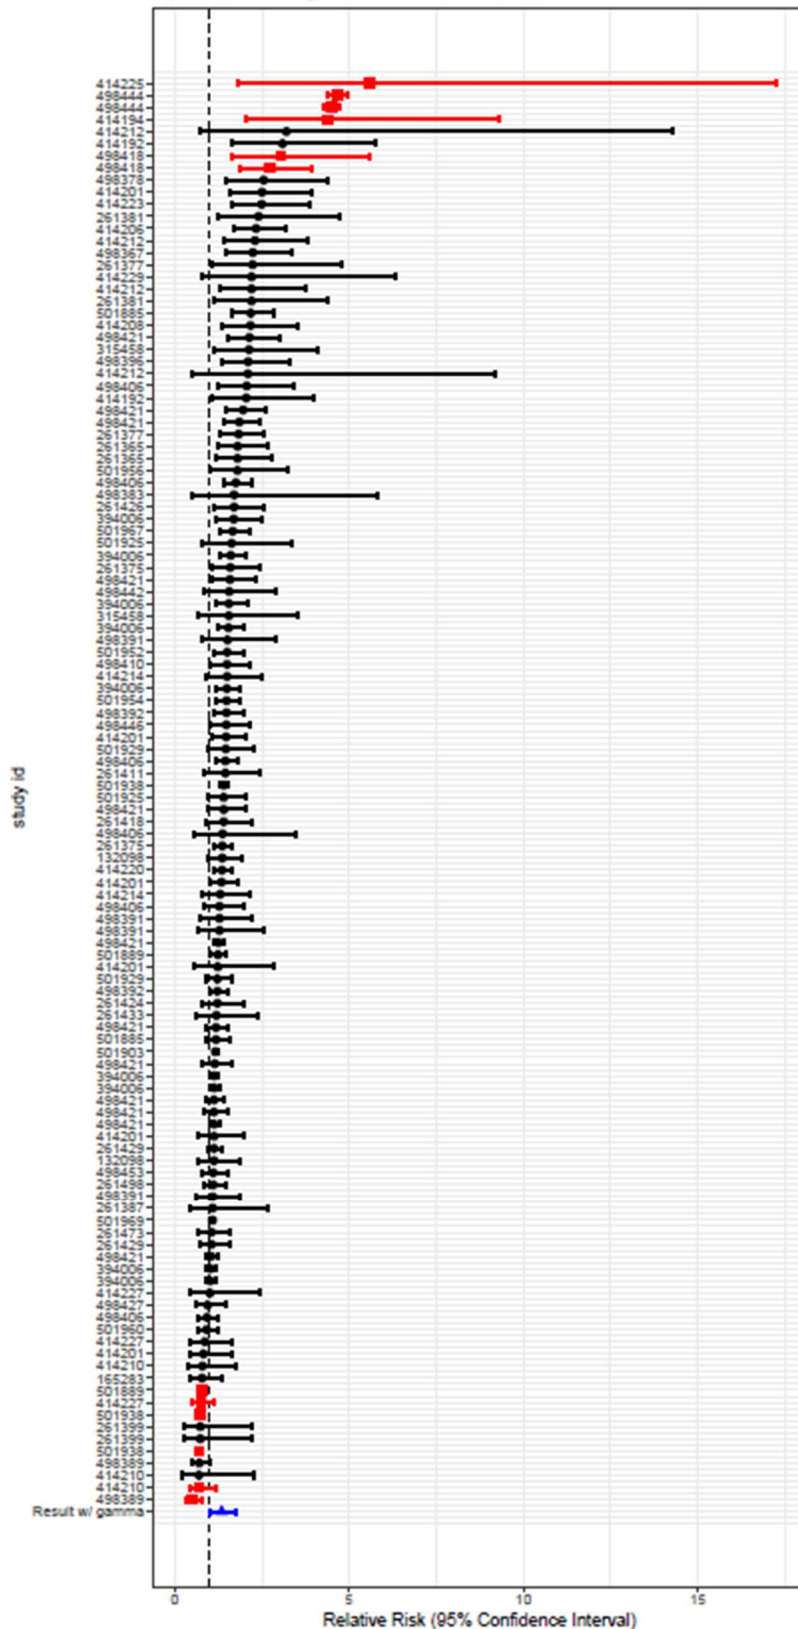

**Figure 8: The forest plot of relative risk of smoking on fracture.**

*Note: The red estimates are trimmed by MR-BRT, the black estimates are included in the final model, and the blue estimate is the pooled relative risk estimate of smoking on fracture. The whiskers around the data points are the 95% confidence intervals of the risk estimates.*

**Section 8: Risk curve details**

The associated cause, reference exposure group, alternative exposure group, and the effect size and standard error in log space for each study included in the dose-response curve estimates, excluding those used to develop the age-attenuation factor for cardiovascular curves without dose-response data, are listed below.

**Table 8: Summary of data inputs**

| Cause                | NID    | Outlier flag | Reference exposure   | Alternative exposure          | Log relative risk | Log standard error |
|----------------------|--------|--------------|----------------------|-------------------------------|-------------------|--------------------|
| afib_and_flutter     | 324155 | 0            | 0 cigarettes per day | 10 to 19 cigarettes per day   | 0.405465          | 0.181973           |
| afib_and_flutter     | 324155 | 0            | 0 cigarettes per day | 10 to 19 cigarettes per day   | 0.41211           | 0.163873           |
| afib_and_flutter     | 324155 | 0            | 0 cigarettes per day | 1 to 9 cigarettes per day     | 0.438255          | 0.171165           |
| afib_and_flutter     | 324155 | 0            | 0 cigarettes per day | 1 to 9 cigarettes per day     | 0.444686          | 0.191327           |
| afib_and_flutter     | 324155 | 0            | 0 cigarettes per day | 20 to 30 cigarettes per day   | 0.494696          | 0.331322           |
| afib_and_flutter     | 324155 | 0            | 0 cigarettes per day | 20 to 30 cigarettes per day   | 0.518794          | 0.314322           |
| afib_and_flutter     | 324168 | 0            | 0 cigarettes per day | 1 to 19 cigarettes per day    | 0.385262          | 0.218659           |
| afib_and_flutter     | 324168 | 0            | 0 cigarettes per day | 20 to 30 cigarettes per day   | 0.457425          | 0.198592           |
| afib_and_flutter     | 350084 | 0            | 0 cigarettes per day | 0 to 10 cigarettes per day    | 0.553885          | 0.230178           |
| afib_and_flutter     | 350084 | 0            | 0 cigarettes per day | 0 to 10 cigarettes per day    | 0.553885          | 0.228712           |
| afib_and_flutter     | 350084 | 0            | 0 cigarettes per day | 20 to 30 cigarettes per day   | 0.476234          | 0.264609           |
| afib_and_flutter     | 350084 | 0            | 0 cigarettes per day | 10 to 20 cigarettes per day   | 0.198851          | 0.25092            |
| afib_and_flutter     | 350084 | 0            | 0 cigarettes per day | 10 to 20 cigarettes per day   | 0.207014          | 0.244732           |
| afib_and_flutter     | 350084 | 0            | 0 cigarettes per day | 20 to 30 cigarettes per day   | 0.451076          | 0.263226           |
| afib_and_flutter     | 350091 | 1            | 0 cigarettes per day | 1 to 15 cigarettes per day    | -0.84397          | 0.443166           |
| afib_and_flutter     | 350091 | 0            | 0 cigarettes per day | 20 to 30 cigarettes per day   | 0.019803          | 0.154812           |
| afib_and_flutter     | 357504 | 1            | 0 cigarettes per day | 1 to 14 cigarettes per day    | 0.039221          | 0.07604            |
| afib_and_flutter     | 357504 | 0            | 0 cigarettes per day | 15 to 22.5 cigarettes per day | 0.262364          | 0.082418           |
| alzheim_oth_dementia | 328492 | 0            | 0 cigarettes per day | 10 to 15 cigarettes per day   | 0.029559          | 0.312067           |
| alzheim_oth_dementia | 328492 | 1            | 0 cigarettes per day | 1 to 9 cigarettes per day     | 0.824175          | 0.226011           |
| alzheim_oth_dementia | 328517 | 0            | 0 cigarettes per day | 0 to 9 cigarettes per day     | 0.076961          | 0.067555           |
| alzheim_oth_dementia | 328517 | 0            | 0 cigarettes per day | 10 to 20 cigarettes per day   | 0.29267           | 0.051401           |
| alzheim_oth_dementia | 328517 | 0            | 0 cigarettes per day | 20 to 40 cigarettes per day   | 0.314811          | 0.06331            |
| alzheim_oth_dementia | 328517 | 0            | 0 cigarettes per day | 40 to 60 cigarettes per day   | 0.698135          | 0.128186           |
| alzheim_oth_dementia | 349159 | 0            | 0 cigarettes per day | 21 to 31.5 cigarettes per day | -0.10536          | 1.074263           |
| alzheim_oth_dementia | 349159 | 0            | 0 cigarettes per day | 0 to 10 cigarettes per day    | 0.198851          | 0.549933           |
| alzheim_oth_dementia | 349159 | 0            | 0 cigarettes per day | 11 to 20 cigarettes per day   | 0.29267           | 0.613006           |
| alzheim_oth_dementia | 358834 | 0            | 0 cigarettes per day | 0 to 19 cigarettes per day    | 0.788457          | 0.41744            |
| alzheim_oth_dementia | 358834 | 0            | 0 cigarettes per day | 20 to 30 cigarettes per day   | 0.993252          | 0.68972            |
| alzheim_oth_dementia | 358836 | 0            | 0 cigarettes per day | 0 to 9 cigarettes per day     | 0.14842           | 2.067206           |
| alzheim_oth_dementia | 358836 | 0            | 0 cigarettes per day | 10 to 15 cigarettes per day   | 1.477049          | 0.67736            |
| alzheim_oth_dementia | 358838 | 1            | 0 cigarettes per day | 61 to 91.5 cigarettes per day | 1.774952          | 4.838291           |

|                          |        |   |                      |                               |          |          |
|--------------------------|--------|---|----------------------|-------------------------------|----------|----------|
| alzheimer_other_dementia | 358838 | 0 | 0 cigarettes per day | 20 to 40 cigarettes per day   | 1.667707 | 0.731613 |
| alzheimer_other_dementia | 358838 | 1 | 0 cigarettes per day | 40 to 60 cigarettes per day   | 0.182322 | 3.656463 |
| alzheimer_other_dementia | 358838 | 0 | 0 cigarettes per day | 0 to 19 cigarettes per day    | 0.470004 | 0.398597 |
| alzheimer_other_dementia | 358838 | 0 | 0 cigarettes per day | 20 to 20 cigarettes per day   | 0.993252 | 0.699169 |
| alzheimer_other_dementia | 501943 | 0 | 0 cigarettes per day | 1 to 9 cigarettes per day     | 0.29267  | 0.1205   |
| alzheimer_other_dementia | 501943 | 0 | 0 cigarettes per day | 10 to 20 cigarettes per day   | 0.113329 | 0.086609 |
| alzheimer_other_dementia | 501943 | 0 | 0 cigarettes per day | 21 to 31.5 cigarettes per day | 0.357674 | 0.085232 |
| alzheimer_other_dementia | 502162 | 0 | 0 cigarettes per day | 10 to 19 cigarettes per day   | 0.270027 | 0.125771 |
| alzheimer_other_dementia | 502162 | 0 | 0 cigarettes per day | 1 to 9 cigarettes per day     | 0.113329 | 0.196207 |
| alzheimer_other_dementia | 502162 | 0 | 0 cigarettes per day | 10 to 19 cigarettes per day   | 0.322083 | 0.12458  |
| alzheimer_other_dementia | 502162 | 0 | 0 cigarettes per day | 20 to 30 cigarettes per day   | 0.553885 | 0.141652 |
| alzheimer_other_dementia | 502162 | 0 | 0 cigarettes per day | 1 to 9 cigarettes per day     | 0.530628 | 0.17894  |
| alzheimer_other_dementia | 502162 | 0 | 0 cigarettes per day | 20 to 30 cigarettes per day   | 0.620576 | 0.105119 |
| aortic_aneurism          | 173863 | 0 | 0 cigarettes per day | 1 to 14 cigarettes per day    | 1.261298 | 1.052278 |
| aortic_aneurism          | 173863 | 0 | 0 cigarettes per day | 15 to 24 cigarettes per day   | 1.595339 | 0.753457 |
| aortic_aneurism          | 173863 | 0 | 0 cigarettes per day | 25 to 37.5 cigarettes per day | 1.686399 | 0.687878 |
| aortic_aneurism          | 236197 | 0 | 0 cigarettes per day | 0 to 9 cigarettes per day     | 1.353255 | 0.95983  |
| aortic_aneurism          | 236197 | 0 | 0 cigarettes per day | 10 to 19 cigarettes per day   | 1.971299 | 0.517346 |
| aortic_aneurism          | 236197 | 0 | 0 cigarettes per day | 20 to 30 cigarettes per day   | 2.090629 | 0.459152 |
| aortic_aneurism          | 328259 | 0 | 0 cigarettes per day | 26 to 39 cigarettes per day   | 0.765468 | 1.864025 |
| aortic_aneurism          | 328259 | 0 | 0 cigarettes per day | 1 to 7 cigarettes per day     | 0.932164 | 0.347501 |
| aortic_aneurism          | 328259 | 0 | 0 cigarettes per day | 1 to 7 cigarettes per day     | 0.947789 | 0.326293 |
| aortic_aneurism          | 328259 | 0 | 0 cigarettes per day | 16 to 25 cigarettes per day   | 1.324419 | 0.411149 |
| aortic_aneurism          | 328259 | 0 | 0 cigarettes per day | 8 to 15 cigarettes per day    | 1.435085 | 0.309767 |
| aortic_aneurism          | 328259 | 0 | 0 cigarettes per day | 8 to 15 cigarettes per day    | 1.814825 | 0.330303 |
| aortic_aneurism          | 331705 | 1 | 0 cigarettes per day | 10 to 19 cigarettes per day   | 0.576613 | 0.21784  |
| aortic_aneurism          | 331705 | 0 | 0 cigarettes per day | 0 to 9 cigarettes per day     | 0.48858  | 0.234756 |
| aortic_aneurism          | 331705 | 1 | 0 cigarettes per day | 20 to 30 cigarettes per day   | 0.307485 | 0.249475 |
| aortic_aneurism          | 343383 | 0 | 0 cigarettes per day | 10 to 20 cigarettes per day   | 1.719189 | 0.665688 |
| aortic_aneurism          | 343383 | 0 | 0 cigarettes per day | 21 to 30 cigarettes per day   | 1.879465 | 0.567105 |
| aortic_aneurism          | 343424 | 0 | 0 cigarettes per day | 1 to 19 cigarettes per day    | 1.252763 | 1.061297 |
| aortic_aneurism          | 343424 | 0 | 0 cigarettes per day | 1 to 19 cigarettes per day    | 1.280934 | 1.031817 |
| aortic_aneurism          | 343424 | 0 | 0 cigarettes per day | 20 to 20 cigarettes per day   | 1.526056 | 0.807509 |
| aortic_aneurism          | 343424 | 0 | 0 cigarettes per day | 21 to 31.5 cigarettes per day | 1.568616 | 0.773863 |
| aortic_aneurism          | 343424 | 0 | 0 cigarettes per day | 20 to 20 cigarettes per day   | 1.609438 | 0.742908 |
| aortic_aneurism          | 343424 | 0 | 0 cigarettes per day | 21 to 31.5 cigarettes per day | 1.84055  | 0.58961  |
| aortic_aneurism          | 347380 | 0 | 0 cigarettes per day | 1 to 7 cigarettes per day     | 0.530628 | 2.185024 |
| aortic_aneurism          | 347380 | 0 | 0 cigarettes per day | 8 to 15 cigarettes per day    | 0.993252 | 1.375756 |
| aortic_aneurism          | 347380 | 0 | 0 cigarettes per day | 16 to 24 cigarettes per day   | 1.098612 | 1.23818  |
| aortic_aneurism          | 350128 | 0 | 0 cigarettes per day | 21 to 31.5 cigarettes per day | 1.94591  | 0.55758  |
| aortic_aneurism          | 350128 | 0 | 0 cigarettes per day | 6 to 10 cigarettes per day    | 1.629241 | 0.55022  |
| aortic_aneurism          | 350128 | 0 | 0 cigarettes per day | 1 to 5 cigarettes per day     | 0.741937 | 0.655977 |
| aortic_aneurism          | 350128 | 0 | 0 cigarettes per day | 11 to 15 cigarettes per day   | 1.223775 | 0.562725 |

|                 |        |   |                      |                                     |          |          |
|-----------------|--------|---|----------------------|-------------------------------------|----------|----------|
| aortic_aneurism | 350128 | 0 | 0 cigarettes per day | 16 to 20 cigarettes per day         | 1.435085 | 0.5345   |
| aortic_aneurism | 350131 | 0 | 0 cigarettes per day | 0 to 9 cigarettes per day           | 0.828552 | 1.62207  |
| aortic_aneurism | 350131 | 0 | 0 cigarettes per day | 10 to 20 cigarettes per day         | 1.697449 | 0.680319 |
| aortic_aneurism | 350131 | 0 | 0 cigarettes per day | 21 to 39 cigarettes per day         | 1.850028 | 0.584047 |
| aortic_aneurism | 350131 | 0 | 0 cigarettes per day | 40 to 60 cigarettes per day         | 1.971299 | 0.517346 |
| aortic_aneurism | 355955 | 0 | 0 cigarettes per day | 1 to 14 cigarettes per day          | -0.19845 | 4.529928 |
| aortic_aneurism | 355955 | 1 | 0 cigarettes per day | 15 to 24 cigarettes per day         | -0.19845 | 4.529928 |
| aortic_aneurism | 358841 | 1 | 0 cigarettes per day | 0 to 9 cigarettes per day           | 1.822935 | 0.43355  |
| aortic_aneurism | 358841 | 0 | 0 cigarettes per day | 10 to 19 cigarettes per day         | 2.280339 | 0.383175 |
| aortic_aneurism | 358841 | 0 | 0 cigarettes per day | 20 to 30 cigarettes per day         | 2.618855 | 0.458514 |
| aortic_aneurism | 358843 | 1 | 0 cigarettes per day | 25 to 37.5 cigarettes per day       | 2.721295 | 0.224893 |
| aortic_aneurism | 358843 | 1 | 0 cigarettes per day | 15 to 24 cigarettes per day         | 2.653242 | 0.217376 |
| aortic_aneurism | 358843 | 0 | 0 cigarettes per day | 5 to 14 cigarettes per day          | 1.774952 | 0.363196 |
| aortic_aneurism | 358843 | 0 | 0 cigarettes per day | 1 to 4 cigarettes per day           | 0.587787 | 0.992063 |
| aortic_aneurism | 358845 | 0 | 0 cigarettes per day | 0 to 19 cigarettes per day          | 0.951658 | 0.303365 |
| aortic_aneurism | 358845 | 0 | 0 cigarettes per day | 0 to 19 cigarettes per day          | 1.064711 | 0.177692 |
| aortic_aneurism | 358845 | 0 | 0 cigarettes per day | 41 to 61.5 cigarettes per day       | 1.506297 | 0.576949 |
| aortic_aneurism | 358845 | 0 | 0 cigarettes per day | 20 to 40 cigarettes per day         | 1.595339 | 0.154717 |
| aortic_aneurism | 358845 | 0 | 0 cigarettes per day | 41 to 61.5 cigarettes per day       | 1.663926 | 0.188428 |
| aortic_aneurism | 358845 | 0 | 0 cigarettes per day | 20 to 40 cigarettes per day         | 1.856298 | 0.267459 |
| aortic_aneurism | 358857 | 0 | 0 cigarettes per day | 21 to 31.5 cigarettes per day       | 1.18479  | 0.293328 |
| aortic_aneurism | 358857 | 0 | 0 cigarettes per day | 1 to 20 cigarettes per day          | 0.792993 | 0.247022 |
| aortic_aneurism | 358857 | 0 | 0 cigarettes per day | 1 to 20 cigarettes per day          | 1.085189 | 0.257688 |
| aortic_aneurism | 358857 | 0 | 0 cigarettes per day | 21 to 31.5 cigarettes per day       | 1.289233 | 0.251588 |
| asthma          | 111344 | 1 | 0 cigarettes per day | 21 to 31.5 cigarettes per day       | 0.04879  | 0.063411 |
| asthma          | 111344 | 0 | 0 cigarettes per day | 10 to 19 cigarettes per day         | 0.058269 | 0.068589 |
| asthma          | 111344 | 0 | 0 cigarettes per day | 0 to 9 cigarettes per day           | 0.113329 | 0.081997 |
| asthma          | 111344 | 0 | 0 cigarettes per day | 0 to 9 cigarettes per day           | 0.24686  | 0.051818 |
| asthma          | 111344 | 0 | 0 cigarettes per day | 10 to 19 cigarettes per day         | 0.322083 | 0.040668 |
| asthma          | 111344 | 0 | 0 cigarettes per day | 21 to 31.5 cigarettes per day       | 0.398776 | 0.035954 |
| asthma          | 111344 | 0 | 0 cigarettes per day | 0 to 9 cigarettes per day           | 0.431782 | 0.09939  |
| asthma          | 111344 | 0 | 0 cigarettes per day | 10 to 19 cigarettes per day         | 0.672944 | 0.072886 |
| asthma          | 111344 | 1 | 0 cigarettes per day | 21 to 31.5 cigarettes per day       | 0.81978  | 0.06518  |
| asthma          | 173863 | 0 | 0 cigarettes per day | 1 to 14 cigarettes per day          | 0.405465 | 1.581633 |
| asthma          | 173863 | 0 | 0 cigarettes per day | 25 to 37.5 cigarettes per day       | 0.405465 | 1.581633 |
| asthma          | 173863 | 0 | 0 cigarettes per day | 15 to 24 cigarettes per day         | 0.693147 | 1.186224 |
| asthma          | 346726 | 0 | 0 cigarettes per day | 11 to 16.5 cigarettes per day       | 1.205971 | 0.335299 |
| asthma          | 346726 | 0 | 0 cigarettes per day | 0 to 9 cigarettes per day           | 0.900161 | 0.344284 |
| asthma          | 346728 | 0 | 0 cigarettes per day | 0.0027 to 0.2712 cigarettes per day | 0.09531  | 0.231911 |
| asthma          | 346728 | 0 | 0 cigarettes per day | 0.274 to 0.8192 cigarettes per day  | 0.587787 | 0.623583 |
| asthma          | 346730 | 0 | 0 cigarettes per day | 16 to 24 cigarettes per day         | 0.04879  | 0.206511 |
| asthma          | 346730 | 0 | 0 cigarettes per day | 1 to 14 cigarettes per day          | 0.65752  | 0.22338  |

|                |        |   |                      |                               |          |          |
|----------------|--------|---|----------------------|-------------------------------|----------|----------|
| asthma         | 346737 | 0 | 0 cigarettes per day | 11 to 16.5 cigarettes per day | 0.14842  | 0.646552 |
| asthma         | 346737 | 0 | 0 cigarettes per day | 0 to 9 cigarettes per day     | 0.239017 | 0.624699 |
| asthma         | 346737 | 0 | 0 cigarettes per day | 0 to 9 cigarettes per day     | 0.672944 | 0.715848 |
| asthma         | 346737 | 0 | 0 cigarettes per day | 11 to 20 cigarettes per day   | 0.858662 | 0.539389 |
| asthma         | 346737 | 0 | 0 cigarettes per day | 21 to 30 cigarettes per day   | 1.043804 | 0.591046 |
| asthma         | 346737 | 0 | 0 cigarettes per day | 31 to 46.5 cigarettes per day | 1.686399 | 0.659486 |
| asthma         | 346743 | 0 | 0 cigarettes per day | 26 to 39 cigarettes per day   | -0.24846 | 0.160256 |
| asthma         | 346743 | 1 | 0 cigarettes per day | 15 to 24 cigarettes per day   | -0.37106 | 0.140491 |
| asthma         | 346743 | 0 | 0 cigarettes per day | 1 to 14 cigarettes per day    | -0.22314 | 0.159439 |
| bladder_cancer | 343155 | 0 | 0 pack-years         | 0 to 20 pack-years            | 0.741937 | 0.42517  |
| bladder_cancer | 343155 | 0 | 0 pack-years         | 21 to 40 pack-years           | 0.993252 | 0.245654 |
| bladder_cancer | 343155 | 0 | 0 pack-years         | 0 to 20 pack-years            | 1.360977 | 0.327054 |
| bladder_cancer | 343155 | 0 | 0 pack-years         | 21 to 40 pack-years           | 1.458615 | 0.266967 |
| bladder_cancer | 343155 | 0 | 0 pack-years         | 41 to 61.5 pack-years         | 1.504077 | 0.243764 |
| bladder_cancer | 343155 | 0 | 0 pack-years         | 41 to 61.5 pack-years         | 1.526056 | 0.160825 |
| bladder_cancer | 343198 | 0 | 0 pack-years         | 1 to 19 pack-years            | 0.405465 | 0.379611 |
| bladder_cancer | 343198 | 0 | 0 pack-years         | 20 to 39 pack-years           | 0.470004 | 0.424747 |
| bladder_cancer | 343198 | 0 | 0 pack-years         | 40 to 59 pack-years           | 1.163151 | 0.49335  |
| bladder_cancer | 343198 | 0 | 0 pack-years         | 60 to 90 pack-years           | 1.987874 | 0.509558 |
| bladder_cancer | 343580 | 0 | 0 pack-years         | 0.05 to 25 pack-years         | 0.470004 | 0.243753 |
| bladder_cancer | 343580 | 0 | 0 pack-years         | 25.05 to 50 pack-years        | 0.916291 | 0.227289 |
| bladder_cancer | 343580 | 0 | 0 pack-years         | 50.05 to 75 pack-years        | 1.193922 | 0.231306 |
| bladder_cancer | 343580 | 0 | 0 pack-years         | 75.05 to 112.5 pack-years     | 0.916291 | 0.262658 |
| bladder_cancer | 344435 | 0 | 0 pack-years         | 20 to 39 pack-years           | 0.593327 | 0.302242 |
| bladder_cancer | 344435 | 0 | 0 pack-years         | 1 to 19 pack-years            | 0.329304 | 0.274954 |
| bladder_cancer | 344435 | 0 | 0 pack-years         | 40 to 60 pack-years           | 1.585145 | 0.427412 |
| bladder_cancer | 344435 | 0 | 0 pack-years         | 20 to 39 pack-years           | 0.858662 | 0.201283 |
| bladder_cancer | 344435 | 0 | 0 pack-years         | 1 to 19 pack-years            | 0.385262 | 0.202539 |
| bladder_cancer | 344435 | 0 | 0 pack-years         | 40 to 60 pack-years           | 0.875469 | 0.193384 |
| bladder_cancer | 502089 | 0 | 0 pack-years         | 1 to 19 pack-years            | 1.223775 | 0.490736 |
| bladder_cancer | 502089 | 1 | 0 pack-years         | 20 to 30 pack-years           | 2.76001  | 0.503111 |
| bladder_cancer | 502130 | 0 | 0 pack-years         | 0 to 10 pack-years            | 0.928219 | 0.469006 |
| bladder_cancer | 502130 | 0 | 0 pack-years         | 10 to 19 pack-years           | 1.118415 | 0.330134 |
| bladder_cancer | 502130 | 1 | 0 pack-years         | 20 to 29 pack-years           | 1.927164 | 0.249833 |
| bladder_cancer | 502130 | 1 | 0 pack-years         | 30 to 45 pack-years           | 2.00148  | 0.222311 |
| bladder_cancer | 502393 | 0 | 0 pack-years         | 16 to 24 pack-years           | -0.22314 | 1.035827 |
| bladder_cancer | 502393 | 0 | 0 pack-years         | 1 to 15 pack-years            | -1.20397 | 1.273936 |
| bladder_cancer | 502393 | 0 | 0 pack-years         | 16 to 24 pack-years           | 0.262364 | 0.36406  |
| bladder_cancer | 502393 | 0 | 0 pack-years         | 1 to 15 pack-years            | -0.91629 | 0.633905 |
| bladder_cancer | 502401 | 0 | 0 pack-years         | 0.05 to 19.95 pack-years      | -0.13926 | 0.330439 |
| bladder_cancer | 502401 | 0 | 0 pack-years         | 20 to 39.95 pack-years        | 0.444686 | 0.326596 |
| bladder_cancer | 502401 | 0 | 0 pack-years         | 40 to 60 pack-years           | 0.698135 | 0.307368 |
| bladder_cancer | 502403 | 0 | 0 pack-years         | 1 to 24 pack-years            | 0.450693 | 0.142378 |

|                |        |   |              |                           |          |          |
|----------------|--------|---|--------------|---------------------------|----------|----------|
| bladder_cancer | 502403 | 0 | 0 pack-years | 25 to 45 pack-years       | 0.775096 | 0.124845 |
| bladder_cancer | 502403 | 0 | 0 pack-years | 46 to 69 pack-years       | 0.796967 | 0.126581 |
| bladder_cancer | 502413 | 0 | 0 pack-years | 21.52 to 40.51 pack-years | 1.420696 | 0.662358 |
| bladder_cancer | 502413 | 0 | 0 pack-years | 40.52 to 60.78 pack-years | 2.424803 | 0.618586 |
| bladder_cancer | 502413 | 0 | 0 pack-years | 0.06 to 21.51 pack-years  | 0.924259 | 0.759246 |
| bladder_cancer | 502413 | 0 | 0 pack-years | 0.06 to 21.51 pack-years  | 0.770108 | 0.410044 |
| bladder_cancer | 502413 | 0 | 0 pack-years | 21.52 to 40.51 pack-years | 0.985817 | 0.372693 |
| bladder_cancer | 502413 | 0 | 0 pack-years | 40.52 to 60.78 pack-years | 1.947338 | 0.340188 |
| bladder_cancer | 502415 | 0 | 0 pack-years | 1 to 19 pack-years        | 0.377957 | 0.1952   |
| bladder_cancer | 502415 | 0 | 0 pack-years | 20 to 30 pack-years       | 1.311571 | 0.174185 |
| bladder_cancer | 502417 | 0 | 0 pack-years | 1 to 19 pack-years        | 0.482426 | 0.337183 |
| bladder_cancer | 502417 | 0 | 0 pack-years | 20 to 39 pack-years       | 0.431782 | 0.34702  |
| bladder_cancer | 502417 | 0 | 0 pack-years | 40 to 60 pack-years       | 0.647103 | 0.39979  |
| bladder_cancer | 502423 | 0 | 0 pack-years | 1 to 26 pack-years        | 0.774958 | 0.329439 |
| bladder_cancer | 502423 | 0 | 0 pack-years | 27 to 40.5 pack-years     | 1.590174 | 0.312474 |
| bladder_cancer | 502425 | 0 | 0 pack-years | 1 to 19 pack-years        | 0.223144 | 0.290816 |
| bladder_cancer | 502425 | 0 | 0 pack-years | 20 to 39 pack-years       | 1.071584 | 0.214433 |
| bladder_cancer | 502425 | 0 | 0 pack-years | 40 to 60 pack-years       | 1.420696 | 0.1925   |
| bladder_cancer | 502425 | 0 | 0 pack-years | 1 to 19 pack-years        | 1.105257 | 0.238826 |
| bladder_cancer | 502425 | 1 | 0 pack-years | 20 to 39 pack-years       | 1.530395 | 0.205306 |
| bladder_cancer | 502425 | 0 | 0 pack-years | 40 to 60 pack-years       | 1.693779 | 0.242939 |
| bladder_cancer | 502429 | 0 | 0 pack-years | 35 to 52.5 pack-years     | 1.193922 | 0.334164 |
| bladder_cancer | 502429 | 0 | 0 pack-years | 1 to 34 pack-years        | 0.587787 | 0.339065 |
| bladder_cancer | 502431 | 0 | 0 pack-years | 1 to 24 pack-years        | 0.369078 | 0.093233 |
| bladder_cancer | 502431 | 1 | 0 pack-years | 25 to 49 pack-years       | 0.53462  | 0.091281 |
| bladder_cancer | 502431 | 1 | 0 pack-years | 50 to 75 pack-years       | 0.569113 | 0.094811 |
| bladder_cancer | 502435 | 0 | 0 pack-years | 1 to 26 pack-years        | 0.495793 | 0.234175 |
| bladder_cancer | 502435 | 0 | 0 pack-years | 27 to 40.5 pack-years     | 0.886738 | 0.217395 |
| bladder_cancer | 502437 | 0 | 0 pack-years | 23.25 to 36.75 pack-years | 0.587787 | 0.156404 |
| bladder_cancer | 502437 | 0 | 0 pack-years | 1 to 10 pack-years        | 0.587787 | 0.166818 |
| bladder_cancer | 502437 | 0 | 0 pack-years | 11 to 23.24 pack-years    | 0.530628 | 0.145547 |
| bladder_cancer | 502437 | 0 | 0 pack-years | 36.76 to 55.14 pack-years | 0.587787 | 0.156404 |
| bladder_cancer | 502437 | 0 | 0 pack-years | 1 to 10 pack-years        | 0.470004 | 0.188163 |
| bladder_cancer | 502444 | 0 | 0 pack-years | 0.1 to 10 pack-years      | -0.09431 | 0.398124 |
| bladder_cancer | 502444 | 0 | 0 pack-years | 11 to 20 pack-years       | 0.693147 | 0.381878 |
| bladder_cancer | 502444 | 0 | 0 pack-years | 40 to 50 pack-years       | 1.360977 | 0.167546 |
| bladder_cancer | 502444 | 0 | 0 pack-years | 31 to 40 pack-years       | 0.916291 | 0.374066 |
| bladder_cancer | 502444 | 0 | 0 pack-years | 40 to 50 pack-years       | 1.193922 | 0.275743 |
| bladder_cancer | 502444 | 0 | 0 pack-years | 21 to 30 pack-years       | 0.530628 | 0.437449 |
| bladder_cancer | 502444 | 0 | 0 pack-years | 31 to 40 pack-years       | 0.832909 | 0.223334 |
| bladder_cancer | 502444 | 0 | 0 pack-years | 11 to 20 pack-years       | 0.530628 | 0.238344 |
| bladder_cancer | 502444 | 0 | 0 pack-years | 21 to 30 pack-years       | 0.587787 | 0.247296 |
| bladder_cancer | 502444 | 0 | 0 pack-years | 0.1 to 10 pack-years      | 0.09531  | 0.285686 |

|                |        |   |              |                           |          |          |
|----------------|--------|---|--------------|---------------------------|----------|----------|
| bladder_cancer | 502444 | 0 | 0 pack-years | 40 to 50 pack-years       | 1.280934 | 0.132128 |
| bladder_cancer | 502444 | 0 | 0 pack-years | 31 to 40 pack-years       | 0.832909 | 0.201137 |
| bladder_cancer | 502444 | 0 | 0 pack-years | 21 to 30 pack-years       | 0.530628 | 0.197242 |
| bladder_cancer | 502444 | 0 | 0 pack-years | 11 to 20 pack-years       | 0.530628 | 0.197242 |
| bladder_cancer | 502444 | 0 | 0 pack-years | 0.1 to 10 pack-years      | 0        | 0.233748 |
| bladder_cancer | 502446 | 1 | 0 pack-years | 22.5 to 33.75 pack-years  | 0.265053 | 0.072072 |
| bladder_cancer | 502446 | 0 | 0 pack-years | 1 to 22.5 pack-years      | 0.190868 | 0.079266 |
| bladder_cancer | 502446 | 0 | 0 pack-years | 22.5 to 33.75 pack-years  | 0.742842 | 0.094918 |
| bladder_cancer | 502446 | 0 | 0 pack-years | 1 to 22.5 pack-years      | 0.332608 | 0.112269 |
| bladder_cancer | 502446 | 0 | 0 pack-years | 22.6 to 33.9 pack-years   | 0.742842 | 0.094918 |
| bladder_cancer | 502446 | 0 | 0 pack-years | 1 to 22.5 pack-years      | 0.190868 | 0.079266 |
| bladder_cancer | 502446 | 0 | 0 pack-years | 1 to 22.5 pack-years      | 0.332608 | 0.112284 |
| bladder_cancer | 502446 | 1 | 0 pack-years | 22.6 to 33.9 pack-years   | 0.265053 | 0.033218 |
| bladder_cancer | 502450 | 0 | 0 pack-years | 60 to 90 pack-years       | 1.435085 | 0.142759 |
| bladder_cancer | 502450 | 0 | 0 pack-years | 50 to 59 pack-years       | 1.609438 | 0.191404 |
| bladder_cancer | 502450 | 0 | 0 pack-years | 1 to 19 pack-years        | 0.530628 | 0.12234  |
| bladder_cancer | 502450 | 0 | 0 pack-years | 20 to 39 pack-years       | 1.163151 | 0.126198 |
| bladder_cancer | 502450 | 0 | 0 pack-years | 40 to 49 pack-years       | 1.589235 | 0.165649 |
| bladder_cancer | 502452 | 0 | 0 pack-years | 1 to 29 pack-years        | 0.405465 | 0.117228 |
| bladder_cancer | 502452 | 0 | 0 pack-years | 30 to 59.9 pack-years     | 0.955511 | 0.107452 |
| bladder_cancer | 502452 | 0 | 0 pack-years | 60 to 89.9 pack-years     | 0.993252 | 0.130313 |
| bladder_cancer | 502452 | 0 | 0 pack-years | 90 to 135 pack-years      | 1.098612 | 0.134711 |
| bladder_cancer | 502452 | 0 | 0 pack-years | 1 to 29 pack-years        | 0.530628 | 0.154626 |
| bladder_cancer | 502452 | 0 | 0 pack-years | 30 to 59.9 pack-years     | 1.064711 | 0.132621 |
| bladder_cancer | 502452 | 0 | 0 pack-years | 60 to 89.9 pack-years     | 1.252763 | 0.217727 |
| bladder_cancer | 502452 | 0 | 0 pack-years | 90 to 135 pack-years      | 0.993252 | 0.301982 |
| bladder_cancer | 502456 | 0 | 0 pack-years | 50 to 75 pack-years       | 0.806476 | 0.30131  |
| bladder_cancer | 502456 | 0 | 0 pack-years | 25 to 37.5 pack-years     | 1.66203  | 0.743037 |
| bladder_cancer | 502456 | 0 | 0 pack-years | 40 to 49 pack-years       | 0.662688 | 0.309054 |
| bladder_cancer | 502456 | 1 | 0 pack-years | 1 to 24 pack-years        | 2.116256 | 0.43364  |
| bladder_cancer | 502456 | 0 | 0 pack-years | 20 to 29 pack-years       | 0.277632 | 0.323714 |
| bladder_cancer | 502456 | 0 | 0 pack-years | 1 to 19 pack-years        | -0.16252 | 0.427895 |
| bladder_cancer | 502456 | 0 | 0 pack-years | 30 to 39 pack-years       | 0.207014 | 0.310164 |
| bladder_cancer | 502458 | 0 | 0 pack-years | 75.05 to 112.5 pack-years | 1.223775 | 0.259163 |
| bladder_cancer | 502458 | 0 | 0 pack-years | 50.05 to 75 pack-years    | 1.435085 | 0.241479 |
| bladder_cancer | 502458 | 0 | 0 pack-years | 0.05 to 25 pack-years     | 0.530628 | 0.262658 |
| bladder_cancer | 502458 | 0 | 0 pack-years | 25.05 to 50 pack-years    | 1.131402 | 0.223334 |
| bladder_cancer | 502462 | 0 | 0 pack-years | 1 to 30 pack-years        | 0.751416 | 0.295513 |
| bladder_cancer | 502462 | 0 | 0 pack-years | 31 to 46.5 pack-years     | 0.832909 | 0.290515 |
| bladder_cancer | 502464 | 0 | 0 pack-years | 0 to 25 pack-years        | 1.029619 | 0.18345  |
| bladder_cancer | 502464 | 1 | 0 pack-years | 25 to 51 pack-years       | 1.824549 | 0.170959 |
| bladder_cancer | 502464 | 1 | 0 pack-years | 52 to 78 pack-years       | 1.960095 | 0.176823 |
| bladder_cancer | 502464 | 0 | 0 pack-years | 1 to 14 pack-years        | 0.587787 | 0.673229 |

|                |        |   |              |                       |          |          |
|----------------|--------|---|--------------|-----------------------|----------|----------|
| bladder_cancer | 502464 | 0 | 0 pack-years | 15 to 22.5 pack-years | 1.481605 | 0.630613 |
| bladder_cancer | 502466 | 0 | 0 pack-years | 1 to 19 pack-years    | 0.108316 | 0.347729 |
| bladder_cancer | 502466 | 0 | 0 pack-years | 20 to 30 pack-years   | 0.834647 | 0.106224 |
| bladder_cancer | 502468 | 0 | 0 pack-years | 1 to 10 pack-years    | 0.470004 | 0.417757 |
| bladder_cancer | 502468 | 0 | 0 pack-years | 30 to 45 pack-years   | 0.832909 | 0.286717 |
| bladder_cancer | 502468 | 1 | 0 pack-years | 21 to 30 pack-years   | 1.547563 | 0.204112 |
| bladder_cancer | 502468 | 1 | 0 pack-years | 11 to 20 pack-years   | 1.193922 | 0.136612 |
| bladder_cancer | 502468 | 0 | 0 pack-years | 1 to 10 pack-years    | 0.530628 | 0.187237 |
| bladder_cancer | 502468 | 0 | 0 pack-years | 30 to 45 pack-years   | 0.693147 | 0.543782 |
| bladder_cancer | 502468 | 1 | 0 pack-years | 21 to 30 pack-years   | 1.308333 | 0.103435 |
| bladder_cancer | 502468 | 0 | 0 pack-years | 11 to 20 pack-years   | 0.641854 | 0.374066 |
| bladder_cancer | 502468 | 0 | 0 pack-years | 30 to 45 pack-years   | 1.280934 | 0.097702 |
| bladder_cancer | 502468 | 1 | 0 pack-years | 11 to 20 pack-years   | 1.098612 | 0.110425 |
| bladder_cancer | 502468 | 0 | 0 pack-years | 1 to 10 pack-years    | 0.405465 | 0.176823 |
| bladder_cancer | 502468 | 0 | 0 pack-years | 21 to 30 pack-years   | 0.993252 | 0.457081 |
| bladder_cancer | 502476 | 0 | 0 pack-years | 1 to 31 pack-years    | 0.270103 | 0.157661 |
| bladder_cancer | 502476 | 0 | 0 pack-years | 1 to 31 pack-years    | 0.319181 | 0.101467 |
| bladder_cancer | 502476 | 0 | 0 pack-years | 1 to 31 pack-years    | 0.627061 | 0.093405 |
| bladder_cancer | 502476 | 0 | 0 pack-years | 1 to 31 pack-years    | 0.902881 | 0.143099 |
| bladder_cancer | 502486 | 0 | 0 pack-years | 20 to 20 pack-years   | 0.515813 | 0.12026  |
| bladder_cancer | 502486 | 0 | 0 pack-years | 40 to 40 pack-years   | 0.831168 | 0.134615 |
| bladder_cancer | 502486 | 0 | 0 pack-years | 80 to 80 pack-years   | 1.24069  | 0.085398 |
| bladder_cancer | 502486 | 0 | 0 pack-years | 60 to 60 pack-years   | 0.86878  | 0.154798 |
| bladder_cancer | 502486 | 0 | 0 pack-years | 40 to 40 pack-years   | 0.978702 | 0.064352 |
| bladder_cancer | 502486 | 0 | 0 pack-years | 20 to 20 pack-years   | 0.555608 | 0.057154 |
| bladder_cancer | 502486 | 0 | 0 pack-years | 60 to 60 pack-years   | 1.200266 | 0.069304 |
| bladder_cancer | 502486 | 0 | 0 pack-years | 80 to 80 pack-years   | 0.980204 | 0.227258 |
| breast_cancer  | 309776 | 1 | 0 pack-years | 0 to 19 pack-years    | 0.741937 | 0.42517  |
| breast_cancer  | 309776 | 1 | 0 pack-years | 20 to 30 pack-years   | 1.064711 | 0.404645 |
| breast_cancer  | 310321 | 0 | 0 pack-years | 1 to 4 pack-years     | 0.076961 | 0.167706 |
| breast_cancer  | 310321 | 0 | 0 pack-years | 10 to 14 pack-years   | 0.076961 | 0.108655 |
| breast_cancer  | 310321 | 0 | 0 pack-years | 15 to 19 pack-years   | 0.198851 | 0.100368 |
| breast_cancer  | 310321 | 0 | 0 pack-years | 5 to 9 pack-years     | 0.262364 | 0.123626 |
| breast_cancer  | 310321 | 0 | 0 pack-years | 20 to 30 pack-years   | 0.29267  | 0.083765 |
| breast_cancer  | 310343 | 0 | 0 pack-years | 1 to 5 pack-years     | 0.067659 | 0.033426 |
| breast_cancer  | 310343 | 0 | 0 pack-years | 6 to 10 pack-years    | 0.10436  | 0.034371 |
| breast_cancer  | 310343 | 0 | 0 pack-years | 11 to 15 pack-years   | 0.165514 | 0.03899  |
| breast_cancer  | 310343 | 1 | 0 pack-years | 16 to 24 pack-years   | 0.29267  | 0.037862 |
| breast_cancer  | 310352 | 0 | 0 pack-years | 10 to 19 pack-years   | 0.19062  | 0.059032 |
| breast_cancer  | 310352 | 0 | 0 pack-years | 50 to 75 pack-years   | 0.165514 | 0.075666 |
| breast_cancer  | 310352 | 0 | 0 pack-years | 40 to 49 pack-years   | 0.14842  | 0.123153 |
| breast_cancer  | 310352 | 0 | 0 pack-years | 0 to 9 pack-years     | 0.039221 | 0.046605 |
| breast_cancer  | 310352 | 0 | 0 pack-years | 30 to 39 pack-years   | 0.00995  | 0.08335  |



|               |        |   |              |                       |          |          |
|---------------|--------|---|--------------|-----------------------|----------|----------|
| breast_cancer | 310352 | 0 | 0 pack-years | 20 to 29 pack-years   | 0.122218 | 0.072241 |
| breast_cancer | 310353 | 0 | 0 pack-years | 1 to 10 pack-years    | 0        | 0.033044 |
| breast_cancer | 310353 | 0 | 0 pack-years | 11 to 20 pack-years   | 0.076961 | 0.035324 |
| breast_cancer | 310353 | 0 | 0 pack-years | 21 to 30 pack-years   | 0.067659 | 0.035654 |
| breast_cancer | 310353 | 0 | 0 pack-years | 31 to 40 pack-years   | 0.14842  | 0.041697 |
| breast_cancer | 310353 | 0 | 0 pack-years | 41 to 50 pack-years   | 0.04879  | 0.058008 |
| breast_cancer | 310353 | 0 | 0 pack-years | 51 to 76.5 pack-years | 0.173953 | 0.05549  |
| breast_cancer | 310366 | 0 | 0 pack-years | 21 to 30 pack-years   | 0.336472 | 0.109329 |
| breast_cancer | 310366 | 0 | 0 pack-years | 11 to 20 pack-years   | 0        | 0.102041 |
| breast_cancer | 310366 | 0 | 0 pack-years | 1 to 10 pack-years    | -0.10536 | 0.141723 |
| breast_cancer | 310366 | 0 | 0 pack-years | 31 to 46.5 pack-years | -0.10536 | 0.141723 |
| breast_cancer | 310414 | 0 | 0 pack-years | 15 to 19 pack-years   | 0.24686  | 0.151467 |
| breast_cancer | 310414 | 0 | 0 pack-years | 20 to 30 pack-years   | 0.392042 | 0.14134  |
| breast_cancer | 310428 | 0 | 0 pack-years | 0 to 19 pack-years    | 0.262364 | 0.470958 |
| breast_cancer | 310428 | 0 | 0 pack-years | 20 to 30 pack-years   | 0.336472 | 0.182216 |
| breast_cancer | 310438 | 0 | 0 pack-years | 31 to 46.5 pack-years | 0.223144 | 0.083673 |
| breast_cancer | 310438 | 0 | 0 pack-years | 0 to 10 pack-years    | 0.019803 | 0.062525 |
| breast_cancer | 310438 | 0 | 0 pack-years | 21 to 29 pack-years   | 0.113329 | 0.109329 |
| breast_cancer | 310438 | 0 | 0 pack-years | 11 to 19 pack-years   | 0.215111 | 0.084348 |
| breast_cancer | 310463 | 0 | 0 pack-years | 10.1 to 19 pack-years | -0.15082 | 0.16018  |
| breast_cancer | 310463 | 1 | 0 pack-years | 21 to 31.5 pack-years | -0.17435 | 0.151846 |
| breast_cancer | 310463 | 0 | 0 pack-years | 3.8 to 9 pack-years   | -0.17435 | 0.1974   |
| breast_cancer | 310463 | 1 | 0 pack-years | 0 to 3.7 pack-years   | -0.34249 | 0.247916 |
| breast_cancer | 310487 | 0 | 0 pack-years | 20 to 29 pack-years   | 0.09531  | 0.069573 |
| breast_cancer | 310487 | 0 | 0 pack-years | 40 to 60 pack-years   | 0.09531  | 0.115955 |
| breast_cancer | 310487 | 0 | 0 pack-years | 0 to 9 pack-years     | 0.09531  | 0.069573 |
| breast_cancer | 310487 | 0 | 0 pack-years | 10 to 19 pack-years   | 0.09531  | 0.069573 |
| breast_cancer | 310487 | 0 | 0 pack-years | 30 to 39 pack-years   | 0.262364 | 0.098116 |
| breast_cancer | 328339 | 1 | 0 pack-years | 20 to 39 pack-years   | 0.542324 | 0.97888  |
| breast_cancer | 328339 | 0 | 0 pack-years | 0 to 19 pack-years    | 0.524729 | 0.532846 |
| breast_cancer | 358689 | 0 | 0 pack-years | 20 to 30 pack-years   | 0.00995  | 0.442008 |
| breast_cancer | 358689 | 1 | 0 pack-years | 0 to 19 pack-years    | -0.17435 | 0.728863 |
| breast_cancer | 359074 | 0 | 0 pack-years | 5 to 9 pack-years     | 0.04879  | 0.10447  |
| breast_cancer | 359074 | 0 | 0 pack-years | 1 to 4 pack-years     | 0.09531  | 0.081169 |
| breast_cancer | 359074 | 0 | 0 pack-years | 10 to 19 pack-years   | 0.239017 | 0.092399 |
| breast_cancer | 359076 | 0 | 0 pack-years | 40 to 60 pack-years   | -0.16252 | 0.222089 |
| breast_cancer | 359076 | 0 | 0 pack-years | 1 to 8 pack-years     | 0.10436  | 0.098823 |
| breast_cancer | 359076 | 0 | 0 pack-years | 10 to 18 pack-years   | 0.165514 | 0.142684 |
| breast_cancer | 359076 | 0 | 0 pack-years | 20 to 28 pack-years   | 0.173953 | 0.158635 |
| breast_cancer | 359076 | 0 | 0 pack-years | 30 to 38 pack-years   | 0.385262 | 0.206511 |
| breast_cancer | 359078 | 0 | 0 pack-years | 21 to 31.5 pack-years | 0.173953 | 0.128623 |
| breast_cancer | 359078 | 0 | 0 pack-years | 20 to 28 pack-years   | 0.09531  | 0.10436  |
| breast_cancer | 359078 | 0 | 0 pack-years | 31 to 46.5 pack-years | 0.067659 | 0.288957 |

|               |        |   |                      |                               |          |          |
|---------------|--------|---|----------------------|-------------------------------|----------|----------|
| breast_cancer | 359078 | 0 | 0 pack-years         | 0 to 9 pack-years             | -0.07257 | 0.065833 |
| breast_cancer | 359078 | 0 | 0 pack-years         | 0 to 19 pack-years            | -0.19845 | 0.171105 |
| breast_cancer | 359078 | 0 | 0 pack-years         | 10 to 18 pack-years           | 0.058269 | 0.089045 |
| breast_cancer | 359082 | 0 | 0 pack-years         | 0 to 14 pack-years            | 0.00995  | 0.202061 |
| breast_cancer | 359082 | 0 | 0 pack-years         | 14 to 20 pack-years           | 0.24686  | 0.292969 |
| breast_cancer | 359082 | 0 | 0 pack-years         | 21 to 31.5 pack-years         | 0.29267  | 0.19799  |
| breast_cancer | 359086 | 0 | 0 pack-years         | 5 to 8.9 pack-years           | -0.10536 | 0.255102 |
| breast_cancer | 359086 | 0 | 0 pack-years         | 10 to 13.9 pack-years         | 0.182322 | 0.297619 |
| breast_cancer | 359086 | 0 | 0 pack-years         | 2.5 to 3.9 pack-years         | 0.262364 | 0.294349 |
| breast_cancer | 359086 | 1 | 0 pack-years         | 0 to 1.5 pack-years           | 0.405465 | 0.170068 |
| breast_cancer | 359086 | 1 | 0 pack-years         | 15 to 22.5 pack-years         | 0.470004 | 0.191327 |
| breast_cancer | 359094 | 0 | 0 pack-years         | 31 to 46.5 pack-years         | 0.239017 | 0.345493 |
| breast_cancer | 359094 | 0 | 0 pack-years         | 10 to 20 pack-years           | 0.029559 | 0.356648 |
| breast_cancer | 359094 | 0 | 0 pack-years         | 20 to 30 pack-years           | -0.23572 | 0.461767 |
| breast_cancer | 359094 | 0 | 0 pack-years         | 0 to 10 pack-years            | -0.03046 | 0.32085  |
| breast_cancer | 448179 | 0 | 0 pack-years         | 0 to 5 pack-years             | 0.139762 | 0.059908 |
| breast_cancer | 448179 | 0 | 0 pack-years         | 6 to 10 pack-years            | 0.165514 | 0.064655 |
| breast_cancer | 448179 | 0 | 0 pack-years         | 11 to 15 pack-years           | 0.270027 | 0.068303 |
| breast_cancer | 448179 | 0 | 0 pack-years         | 15 to 22.5 pack-years         | 0.254642 | 0.064856 |
| breast_cancer | 502130 | 0 | 0 pack-years         | 0 to 10 pack-years            | -0.03046 | 0.058229 |
| breast_cancer | 502130 | 1 | 0 pack-years         | 10 to 19 pack-years           | -0.12783 | 0.089259 |
| breast_cancer | 502130 | 0 | 0 pack-years         | 20 to 29 pack-years           | 0.113329 | 0.085835 |
| breast_cancer | 502130 | 0 | 0 pack-years         | 30 to 45 pack-years           | -0.01005 | 0.079321 |
| breast_cancer | 502184 | 0 | 0 pack-years         | 1 to 9 pack-years             | 0.157004 | 0.181448 |
| breast_cancer | 502184 | 0 | 0 pack-years         | 10 to 19 pack-years           | 0.04879  | 0.245258 |
| breast_cancer | 502184 | 0 | 0 pack-years         | 20 to 30 pack-years           | 0.451076 | 0.221451 |
| breast_cancer | 502184 | 0 | 0 pack-years         | 1 to 9 pack-years             | 0.058269 | 0.161461 |
| breast_cancer | 502184 | 0 | 0 pack-years         | 10 to 19 pack-years           | -0.04082 | 0.208635 |
| breast_cancer | 502184 | 0 | 0 pack-years         | 20 to 30 pack-years           | 0.122218 | 0.15602  |
| breast_cancer | 502439 | 0 | 0 pack-years         | 10 to 14.9 pack-years         | 0.207014 | 0.083016 |
| breast_cancer | 502439 | 0 | 0 pack-years         | 15 to 19.9 pack-years         | -0.01005 | 0.099253 |
| breast_cancer | 502439 | 0 | 0 pack-years         | 2.5 to 4.9 pack-years         | 0.215111 | 0.104276 |
| breast_cancer | 502439 | 0 | 0 pack-years         | 5 to 9.9 pack-years           | 0.131028 | 0.084327 |
| breast_cancer | 502439 | 0 | 0 pack-years         | 20 to 30 pack-years           | 0.231112 | 0.076907 |
| cataracts     | 261496 | 0 | 0 cigarettes per day | 1 to 14 cigarettes per day    | -0.06188 | 0.881323 |
| cataracts     | 261496 | 0 | 0 cigarettes per day | 1 to 14 cigarettes per day    | 0.364643 | 0.575308 |
| cataracts     | 261496 | 0 | 0 cigarettes per day | 15 to 22.5 cigarettes per day | 0.470004 | 0.517777 |
| cataracts     | 261496 | 0 | 0 cigarettes per day | 15 to 22.5 cigarettes per day | 0.482426 | 0.511385 |
| cataracts     | 261527 | 0 | 0 cigarettes per day | 0 to 19 cigarettes per day    | -0.0202  | 0.471158 |
| cataracts     | 261527 | 0 | 0 cigarettes per day | 20 to 30 cigarettes per day   | 0.350657 | 0.434751 |
| cataracts     | 261527 | 0 | 0 cigarettes per day | 0 to 19 cigarettes per day    | 0.500775 | 0.38961  |
| cataracts     | 263023 | 0 | 0 cigarettes per day | 1 to 5 cigarettes per day     | -0.05129 | 0.126208 |
| cataracts     | 263023 | 0 | 0 cigarettes per day | 6 to 10 cigarettes per day    | 0.076961 | 0.09212  |

|                         |        |   |                      |                               |          |          |
|-------------------------|--------|---|----------------------|-------------------------------|----------|----------|
| cataracts               | 263023 | 0 | 0 cigarettes per day | 11 to 15 cigarettes per day   | 0.19062  | 0.109631 |
| cataracts               | 263023 | 0 | 0 cigarettes per day | 16 to 24 cigarettes per day   | 0.285179 | 0.161117 |
| cataracts               | 350491 | 1 | 0 cigarettes per day | 1 to 14 cigarettes per day    | 0.932164 | 0.227088 |
| cataracts               | 350491 | 1 | 0 cigarettes per day | 15 to 24 cigarettes per day   | 0.978326 | 0.249232 |
| cataracts               | 350491 | 0 | 0 cigarettes per day | 25 to 37.5 cigarettes per day | 1.05779  | 0.364788 |
| cataracts               | 350493 | 0 | 0 cigarettes per day | 35 to 52.5 cigarettes per day | 0.457425 | 0.264789 |
| cataracts               | 350493 | 0 | 0 cigarettes per day | 15 to 24 cigarettes per day   | 0.285179 | 0.153445 |
| cataracts               | 350493 | 0 | 0 cigarettes per day | 25 to 34 cigarettes per day   | 0.336472 | 0.213192 |
| cataracts               | 350493 | 0 | 0 cigarettes per day | 1 to 14 cigarettes per day    | -0.34249 | 0.233544 |
| cataracts               | 350493 | 0 | 0 cigarettes per day | 1 to 14 cigarettes per day    | 0.14842  | 0.105559 |
| cataracts               | 359116 | 0 | 0 cigarettes per day | 0 to 14 cigarettes per day    | 0.113329 | 0.011388 |
| cataracts               | 359116 | 0 | 0 cigarettes per day | 15 to 22.5 cigarettes per day | 0.231112 | 0.014172 |
| cataracts               | 359118 | 0 | 0 cigarettes per day | 1 to 5 cigarettes per day     | 0.10436  | 0.054875 |
| cataracts               | 359118 | 0 | 0 cigarettes per day | 6 to 10 cigarettes per day    | 0.131028 | 0.040363 |
| cataracts               | 359118 | 0 | 0 cigarettes per day | 11 to 15 cigarettes per day   | 0.165514 | 0.043342 |
| cataracts               | 359118 | 0 | 0 cigarettes per day | 15 to 22.5 cigarettes per day | 0.300105 | 0.039616 |
| cataracts               | 359119 | 0 | 0 cigarettes per day | 0 to 19 cigarettes per day    | -0.06188 | 0.374512 |
| cataracts               | 359119 | 0 | 0 cigarettes per day | 0 to 19 cigarettes per day    | -0.04082 | 0.369366 |
| cataracts               | 359119 | 0 | 0 cigarettes per day | 20 to 30 cigarettes per day   | 0.71784  | 0.207815 |
| cataracts               | 359121 | 0 | 0 cigarettes per day | 0 to 9 cigarettes per day     | 0.00995  | 0.164175 |
| cataracts               | 359121 | 0 | 0 cigarettes per day | 20 to 29 cigarettes per day   | 0.113329 | 0.16855  |
| cataracts               | 359121 | 0 | 0 cigarettes per day | 31 to 46.5 cigarettes per day | 0.378436 | 0.262091 |
| cataracts               | 501958 | 0 | 0 cigarettes per day | 10 to 15 cigarettes per day   | -0.27813 | 0.150845 |
| cataracts               | 501958 | 1 | 0 cigarettes per day | 16 to 20 cigarettes per day   | -0.32962 | 0.183545 |
| cataracts               | 501958 | 0 | 0 cigarettes per day | 1 to 9 cigarettes per day     | -0.17162 | 0.21322  |
| cataracts               | 501958 | 1 | 0 cigarettes per day | 21 to 31.5 cigarettes per day | -0.21791 | 0.180479 |
| cervical_cancer         | 328339 | 1 | 0 pack-years         | 0 to 19 pack-years            | -0.07257 | 1.859776 |
| cervical_cancer         | 328339 | 0 | 0 pack-years         | 20 to 39 pack-years           | 1.427916 | 1.016738 |
| cervical_cancer         | 347864 | 0 | 0 pack-years         | 0 to 1 pack-years             | 0.254642 | 0.312451 |
| cervical_cancer         | 347864 | 0 | 0 pack-years         | 12 to 18 pack-years           | 0.385262 | 0.315841 |
| cervical_cancer         | 347864 | 0 | 0 pack-years         | 8 to 11 pack-years            | 0.41871  | 0.313843 |
| cervical_cancer         | 347864 | 0 | 0 pack-years         | 4 to 5 pack-years             | 0.746688 | 0.305881 |
| cervical_cancer         | 347864 | 1 | 0 pack-years         | 2 to 3 pack-years             | 0.797507 | 0.294172 |
| cervical_cancer         | 347864 | 0 | 0 pack-years         | 6 to 7 pack-years             | 0.951658 | 0.321094 |
| cervical_cancer         | 358583 | 0 | 0 pack-years         | 0 to 9 pack-years             | 0.405465 | 0.204082 |
| cervical_cancer         | 502130 | 0 | 0 pack-years         | 0 to 10 pack-years            | 0.536493 | 0.740159 |
| cervical_cancer         | 502130 | 0 | 0 pack-years         | 10 to 19 pack-years           | 1.015231 | 0.460475 |
| cervical_cancer         | 502130 | 0 | 0 pack-years         | 20 to 29 pack-years           | 0.993252 | 0.492843 |
| cervical_cancer         | 502130 | 0 | 0 pack-years         | 30 to 45 pack-years           | 0.908259 | 0.457922 |
| colon_and_rectum_cancer | 164581 | 0 | 0 pack-years         | 0 to 10 pack-years            | -0.52763 | 0.609651 |
| colon_and_rectum_cancer | 164581 | 0 | 0 pack-years         | 11 to 16.5 pack-years         | -0.26136 | 0.54996  |
| colon_and_rectum_cancer | 164581 | 0 | 0 pack-years         | 11 to 16.5 pack-years         | -0.06188 | 1.071971 |
| colon_and_rectum_cancer | 164581 | 0 | 0 pack-years         | 0 to 20 pack-years            | 0.285179 | 0.489105 |

|                         |        |   |              |                           |          |          |
|-------------------------|--------|---|--------------|---------------------------|----------|----------|
| colon_and_rectum_cancer | 164581 | 0 | 0 pack-years | 0 to 20 pack-years        | 0.307485 | 0.288866 |
| colon_and_rectum_cancer | 164581 | 0 | 0 pack-years | 21 to 31.5 pack-years     | 0.314811 | 0.281171 |
| colon_and_rectum_cancer | 164581 | 0 | 0 pack-years | 0 to 10 pack-years        | 0.565314 | 0.658047 |
| colon_and_rectum_cancer | 164581 | 1 | 0 pack-years | 21 to 31.5 pack-years     | 0.891998 | 0.437019 |
| colon_and_rectum_cancer | 309619 | 0 | 0 pack-years | 30 to 39 pack-years       | 0.336472 | 0.173105 |
| colon_and_rectum_cancer | 328339 | 1 | 0 pack-years | 40 to 59 pack-years       | 1.272566 | 1.837878 |
| colon_and_rectum_cancer | 328339 | 0 | 0 pack-years | 20 to 39 pack-years       | 0.71784  | 0.990543 |
| colon_and_rectum_cancer | 328339 | 0 | 0 pack-years | 40 to 59 pack-years       | 0.593327 | 0.267787 |
| colon_and_rectum_cancer | 328339 | 0 | 0 pack-years | 0 to 19 pack-years        | 0.24686  | 0.406569 |
| colon_and_rectum_cancer | 328339 | 0 | 0 pack-years | 20 to 39 pack-years       | 0.131028 | 0.2372   |
| colon_and_rectum_cancer | 328339 | 0 | 0 pack-years | 40 to 59 pack-years       | 0.113329 | 0.264213 |
| colon_and_rectum_cancer | 328339 | 0 | 0 pack-years | 20 to 39 pack-years       | 0.300105 | 0.725624 |
| colon_and_rectum_cancer | 328339 | 0 | 0 pack-years | 0 to 19 pack-years        | 0.076961 | 0.375567 |
| colon_and_rectum_cancer | 328339 | 0 | 0 pack-years | 60 to 90 pack-years       | 0.029559 | 0.517634 |
| colon_and_rectum_cancer | 328339 | 0 | 0 pack-years | 0 to 19 pack-years        | -0.05129 | 0.988185 |
| colon_and_rectum_cancer | 328339 | 0 | 0 pack-years | 60 to 90 pack-years       | -0.11653 | 0.464343 |
| colon_and_rectum_cancer | 328339 | 0 | 0 pack-years | 0 to 19 pack-years        | -0.4943  | 0.719304 |
| colon_and_rectum_cancer | 328339 | 0 | 0 pack-years | 20 to 39 pack-years       | 0.113329 | 0.273324 |
| colon_and_rectum_cancer | 343580 | 0 | 0 pack-years | 75.05 to 112.5 pack-years | 0.09531  | 0.294051 |
| colon_and_rectum_cancer | 343580 | 0 | 0 pack-years | 50.05 to 75 pack-years    | -0.10536 | 0.262658 |
| colon_and_rectum_cancer | 343580 | 0 | 0 pack-years | 25.05 to 50 pack-years    | 0.09531  | 0.240934 |
| colon_and_rectum_cancer | 343580 | 0 | 0 pack-years | 0.05 to 25 pack-years     | 0.09531  | 0.240934 |
| colon_and_rectum_cancer | 343580 | 0 | 0 pack-years | 50.05 to 75 pack-years    | -0.10536 | 0.197242 |
| colon_and_rectum_cancer | 343580 | 0 | 0 pack-years | 25.05 to 50 pack-years    | 0.09531  | 0.176823 |
| colon_and_rectum_cancer | 343580 | 0 | 0 pack-years | 0.05 to 25 pack-years     | 0.182322 | 0.20687  |
| colon_and_rectum_cancer | 343580 | 0 | 0 pack-years | 75.05 to 112.5 pack-years | -0.10536 | 0.233748 |
| colon_and_rectum_cancer | 347927 | 0 | 0 pack-years | 40 to 60 pack-years       | 0.482426 | 0.226757 |
| colon_and_rectum_cancer | 347927 | 0 | 0 pack-years | 20 to 39 pack-years       | 0.076961 | 0.238568 |
| colon_and_rectum_cancer | 347927 | 0 | 0 pack-years | 1 to 19 pack-years        | 0.139762 | 0.106477 |
| colon_and_rectum_cancer | 347927 | 0 | 0 pack-years | 20 to 39 pack-years       | 0.14842  | 0.116555 |
| colon_and_rectum_cancer | 347927 | 0 | 0 pack-years | 40 to 60 pack-years       | 0.19062  | 0.130713 |
| colon_and_rectum_cancer | 347927 | 0 | 0 pack-years | 1 to 19 pack-years        | 0.262364 | 0.202119 |
| colon_and_rectum_cancer | 347932 | 0 | 0 pack-years | 10 to 19 pack-years       | 0.405465 | 0.136054 |
| colon_and_rectum_cancer | 347932 | 0 | 0 pack-years | 0 to 9 pack-years         | 0        | 0.127551 |
| colon_and_rectum_cancer | 347932 | 0 | 0 pack-years | 20 to 30 pack-years       | 0.262364 | 0.156986 |
| colon_and_rectum_cancer | 347935 | 0 | 0 pack-years | 0 to 19 pack-years        | -0.44629 | 0.613839 |
| colon_and_rectum_cancer | 347935 | 0 | 0 pack-years | 40 to 60 pack-years       | 0.076961 | 0.576342 |
| colon_and_rectum_cancer | 347935 | 0 | 0 pack-years | 20 to 39 pack-years       | 0.14842  | 0.580577 |
| colon_and_rectum_cancer | 347935 | 0 | 0 pack-years | 0 to 19 pack-years        | 0.845868 | 0.786108 |
| colon_and_rectum_cancer | 347935 | 0 | 0 pack-years | 40 to 60 pack-years       | 0.985817 | 0.615862 |
| colon_and_rectum_cancer | 347935 | 1 | 0 pack-years | 20 to 39 pack-years       | 1.435085 | 0.607993 |
| colon_and_rectum_cancer | 358658 | 0 | 0 pack-years | 0.25 to 40 pack-years     | 0.966984 | 0.879763 |
| colon_and_rectum_cancer | 358658 | 0 | 0 pack-years | 61 to 91.5 pack-years     | 0.262364 | 0.792779 |

|                         |        |   |              |                       |          |          |
|-------------------------|--------|---|--------------|-----------------------|----------|----------|
| colon_and_rectum_cancer | 358658 | 0 | 0 pack-years | 41 to 60 pack-years   | -0.05129 | 0.687433 |
| colon_and_rectum_cancer | 358689 | 0 | 0 pack-years | 20 to 30 pack-years   | -0.34249 | 0.402414 |
| colon_and_rectum_cancer | 358689 | 0 | 0 pack-years | 0 to 19 pack-years    | 0.239017 | 0.283224 |
| colon_and_rectum_cancer | 502130 | 1 | 0 pack-years | 0 to 10 pack-years    | 0.444686 | 0.169897 |
| colon_and_rectum_cancer | 502130 | 0 | 0 pack-years | 10 to 19 pack-years   | 0.262364 | 0.139424 |
| colon_and_rectum_cancer | 502130 | 0 | 0 pack-years | 20 to 29 pack-years   | 0.285179 | 0.144213 |
| colon_and_rectum_cancer | 502130 | 0 | 0 pack-years | 30 to 45 pack-years   | 0.122218 | 0.136756 |
| colon_and_rectum_cancer | 502135 | 0 | 0 pack-years | 30 to 45 pack-years   | 0.039221 | 0.09245  |
| colon_and_rectum_cancer | 502135 | 0 | 0 pack-years | 1 to 30 pack-years    | -0.03046 | 0.1013   |
| colon_and_rectum_cancer | 502139 | 0 | 0 pack-years | 1 to 19 pack-years    | 0.076961 | 0.089019 |
| colon_and_rectum_cancer | 502139 | 0 | 0 pack-years | 20 to 39 pack-years   | 0.086178 | 0.099627 |
| colon_and_rectum_cancer | 502139 | 0 | 0 pack-years | 40 to 60 pack-years   | 0.239017 | 0.101794 |
| colon_and_rectum_cancer | 502184 | 0 | 0 pack-years | 1 to 9 pack-years     | -0.13926 | 0.303927 |
| colon_and_rectum_cancer | 502184 | 0 | 0 pack-years | 10 to 19 pack-years   | 0.518794 | 0.296892 |
| colon_and_rectum_cancer | 502184 | 1 | 0 pack-years | 20 to 30 pack-years   | 0.71295  | 0.238487 |
| colon_and_rectum_cancer | 502184 | 0 | 0 pack-years | 1 to 9 pack-years     | 0.19062  | 0.326326 |
| colon_and_rectum_cancer | 502184 | 0 | 0 pack-years | 10 to 19 pack-years   | 0.300105 | 0.342307 |
| colon_and_rectum_cancer | 502184 | 0 | 0 pack-years | 20 to 30 pack-years   | 0.215111 | 0.286177 |
| colon_and_rectum_cancer | 502196 | 1 | 0 pack-years | 0 to 20 pack-years    | 0.797507 | 0.275602 |
| colon_and_rectum_cancer | 502196 | 1 | 0 pack-years | 20 to 30 pack-years   | 1.178655 | 0.521313 |
| colon_and_rectum_cancer | 502236 | 1 | 0 pack-years | 1 to 19 pack-years    | -0.44629 | 0.148762 |
| colon_and_rectum_cancer | 502236 | 0 | 0 pack-years | 20 to 39 pack-years   | 0.00995  | 0.14467  |
| colon_and_rectum_cancer | 502236 | 0 | 0 pack-years | 40 to 60 pack-years   | 0.553885 | 0.18302  |
| colon_and_rectum_cancer | 502236 | 0 | 0 pack-years | 1 to 19 pack-years    | 0.683097 | 0.328534 |
| colon_and_rectum_cancer | 502236 | 0 | 0 pack-years | 20 to 30 pack-years   | 0.996949 | 0.61681  |
| colon_and_rectum_cancer | 502484 | 0 | 0 pack-years | 1 to 10 pack-years    | -0.21072 | 0.423364 |
| colon_and_rectum_cancer | 502484 | 0 | 0 pack-years | 11 to 16.5 pack-years | 0.173953 | 0.292644 |
| copd                    | 115406 | 0 | 0 pack-years | 1 to 10 pack-years    | 0.182322 | 0.170068 |
| copd                    | 115406 | 0 | 0 pack-years | 11 to 20 pack-years   | 0.955511 | 0.155024 |
| copd                    | 115406 | 0 | 0 pack-years | 31 to 40 pack-years   | 1.098612 | 0.157313 |
| copd                    | 115406 | 0 | 0 pack-years | 21 to 30 pack-years   | 1.223775 | 0.144058 |
| copd                    | 115406 | 0 | 0 pack-years | 41 to 50 pack-years   | 1.360977 | 0.178571 |
| copd                    | 115406 | 0 | 0 pack-years | 51 to 76.5 pack-years | 1.740466 | 0.149481 |
| copd                    | 315813 | 0 | 0 pack-years | 1 to 9 pack-years     | 0.587787 | 2.253401 |
| copd                    | 315813 | 0 | 0 pack-years | 10 to 19 pack-years   | 2.128232 | 0.65294  |
| copd                    | 315813 | 0 | 0 pack-years | 21 to 31.5 pack-years | 2.701361 | 0.636899 |
| copd                    | 343461 | 0 | 0 pack-years | 28 to 42 pack-years   | 2.391511 | 0.929811 |
| copd                    | 343461 | 0 | 0 pack-years | 14 to 27 pack-years   | 1.144223 | 0.489112 |
| copd                    | 343461 | 0 | 0 pack-years | 14 to 27 pack-years   | 0.943906 | 0.271659 |
| copd                    | 343461 | 0 | 0 pack-years | 28 to 42 pack-years   | 0.65752  | 0.325393 |
| copd                    | 343461 | 0 | 0 pack-years | 1 to 13 pack-years    | -0.67334 | 0.669142 |
| copd                    | 343461 | 0 | 0 pack-years | 1 to 13 pack-years    | 0.824175 | 0.493841 |
| copd                    | 356165 | 0 | 0 pack-years | 0 to 19 pack-years    | 1.163151 | 0.406569 |

|          |        |   |                      |                               |          |          |
|----------|--------|---|----------------------|-------------------------------|----------|----------|
| copd     | 356165 | 0 | 0 pack-years         | 40 to 60 pack-years           | 1.868721 | 0.609804 |
| copd     | 356165 | 0 | 0 pack-years         | 20 to 40 pack-years           | 1.961502 | 0.475401 |
| copd     | 356273 | 0 | 0 pack-years         | 1 to 19 pack-years            | 0.457425 | 0.119478 |
| copd     | 356273 | 1 | 0 pack-years         | 20 to 30 pack-years           | 0.832909 | 0.10315  |
| copd     | 356273 | 0 | 0 pack-years         | 1 to 19 pack-years            | 0.978326 | 0.212905 |
| copd     | 356273 | 0 | 0 pack-years         | 20 to 30 pack-years           | 1.371181 | 0.336035 |
| copd     | 356275 | 0 | 0 pack-years         | 41 to 61.5 pack-years         | 1.466952 | 0.405186 |
| copd     | 356275 | 0 | 0 pack-years         | 0.05 to 20 pack-years         | 0.692647 | 0.249104 |
| copd     | 356275 | 0 | 0 pack-years         | 20 to 40 pack-years           | 0.736207 | 0.384364 |
| copd     | 356342 | 0 | 0 pack-years         | 0 to 20 pack-years            | 1.321756 | 0.338095 |
| copd     | 356342 | 0 | 0 pack-years         | 0 to 19 pack-years            | 0.593327 | 0.42423  |
| copd     | 356344 | 0 | 0 pack-years         | 1 to 10 pack-years            | -0.01005 | 0.405046 |
| copd     | 356344 | 0 | 0 pack-years         | 11 to 16.5 pack-years         | 1.036737 | 0.654056 |
| copd     | 426275 | 1 | 0 pack-years         | 0 to 19 pack-years            | 3.068053 | 0.102041 |
| copd     | 426275 | 0 | 0 pack-years         | 60 to 79 pack-years           | 2.785011 | 0.179516 |
| copd     | 426275 | 0 | 0 pack-years         | 80 to 100 pack-years          | 2.595255 | 0.148492 |
| copd     | 426275 | 0 | 0 pack-years         | 40 to 59 pack-years           | 2.501436 | 0.125878 |
| copd     | 426275 | 0 | 0 pack-years         | 60 to 79 pack-years           | 2.424803 | 0.154416 |
| copd     | 426275 | 0 | 0 pack-years         | 80 to 100 pack-years          | 3.058707 | 0.178452 |
| copd     | 426275 | 0 | 0 pack-years         | 20 to 39 pack-years           | 2.19277  | 0.154883 |
| copd     | 426275 | 0 | 0 pack-years         | 20 to 39 pack-years           | 2.174752 | 0.133349 |
| copd     | 426275 | 1 | 0 pack-years         | 0 to 19 pack-years            | 1.944481 | 0.191235 |
| copd     | 426275 | 0 | 0 pack-years         | 0 to 19 pack-years            | 1.776646 | 0.164888 |
| copd     | 426275 | 0 | 0 pack-years         | 40 to 59 pack-years           | 2.251292 | 0.137487 |
| copd     | 502093 | 0 | 0 pack-years         | 0 to 20 pack-years            | 0.058269 | 0.273307 |
| copd     | 502093 | 0 | 0 pack-years         | 20 to 39 pack-years           | 0.518794 | 0.285518 |
| copd     | 502093 | 0 | 0 pack-years         | 40 to 60 pack-years           | 1.105257 | 0.311913 |
| copd     | 502095 | 0 | 0 pack-years         | 0.1 to 10 pack-years          | 0.652325 | 0.055735 |
| copd     | 502095 | 0 | 0 pack-years         | 10.1 to 20 pack-years         | 1.175573 | 0.042353 |
| copd     | 502095 | 0 | 0 pack-years         | 20.1 to 30 pack-years         | 1.719189 | 0.038406 |
| copd     | 502095 | 1 | 0 pack-years         | 30.1 to 45.15 pack-years      | 2.343727 | 0.031807 |
| copd     | 502107 | 0 | 0 pack-years         | 1 to 10 pack-years            | 0.788457 | 0.112919 |
| copd     | 502107 | 1 | 0 pack-years         | 11 to 16.5 pack-years         | 1.764731 | 0.106998 |
| copd     | 502472 | 0 | 0 pack-years         | 20 to 30 pack-years           | 0.866512 | 0.208305 |
| copd     | 502472 | 1 | 0 pack-years         | 1 to 19 pack-years            | -0.23181 | 0.18533  |
| diabetes | 230548 | 0 | 0 cigarettes per day | 1 to 20 cigarettes per day    | 0.198851 | 0.150552 |
| diabetes | 230548 | 0 | 0 cigarettes per day | 21 to 31.5 cigarettes per day | 0.239017 | 0.154668 |
| diabetes | 236197 | 0 | 0 cigarettes per day | 0 to 9 cigarettes per day     | 0.300105 | 1.198413 |
| diabetes | 236197 | 0 | 0 cigarettes per day | 10 to 19 cigarettes per day   | 0.620576 | 0.869816 |
| diabetes | 236197 | 0 | 0 cigarettes per day | 20 to 30 cigarettes per day   | 0.774727 | 0.745556 |
| diabetes | 255434 | 0 | 0 cigarettes per day | 1 to 9 cigarettes per day     | 0.157004 | 0.337956 |
| diabetes | 255434 | 0 | 0 cigarettes per day | 10 to 15 cigarettes per day   | 0.457425 | 0.161457 |
| diabetes | 255463 | 0 | 0 cigarettes per day | 1 to 19 cigarettes per day    | 0.067659 | 0.295632 |

|          |        |   |                      |                               |          |          |
|----------|--------|---|----------------------|-------------------------------|----------|----------|
| diabetes | 255463 | 0 | 0 cigarettes per day | 1 to 19 cigarettes per day    | 0.131028 | 0.140977 |
| diabetes | 255463 | 0 | 0 cigarettes per day | 20 to 30 cigarettes per day   | 0.314811 | 0.107999 |
| diabetes | 255463 | 0 | 0 cigarettes per day | 20 to 30 cigarettes per day   | 1.07841  | 0.341004 |
| diabetes | 309584 | 0 | 0 cigarettes per day | 1 to 10 cigarettes per day    | -0.17435 | 0.264213 |
| diabetes | 309584 | 0 | 0 cigarettes per day | 11 to 20 cigarettes per day   | 0.231112 | 0.119453 |
| diabetes | 309584 | 0 | 0 cigarettes per day | 21 to 31.5 cigarettes per day | 0.431782 | 0.127551 |
| diabetes | 309588 | 0 | 0 cigarettes per day | 16 to 25 cigarettes per day   | 1.18479  | 0.617082 |
| diabetes | 309588 | 0 | 0 cigarettes per day | 1 to 15 cigarettes per day    | 0.122218 | 0.893986 |
| diabetes | 309588 | 0 | 0 cigarettes per day | 26 to 39 cigarettes per day   | 1.166271 | 0.697756 |
| diabetes | 309592 | 0 | 0 cigarettes per day | 1 to 14 cigarettes per day    | -0.3285  | 0.262188 |
| diabetes | 309592 | 0 | 0 cigarettes per day | 1 to 14 cigarettes per day    | 0.131028 | 0.154404 |
| diabetes | 309592 | 0 | 0 cigarettes per day | 15 to 22.5 cigarettes per day | 0.270027 | 0.089578 |
| diabetes | 309592 | 0 | 0 cigarettes per day | 15 to 22.5 cigarettes per day | 0.329304 | 0.157833 |
| diabetes | 309592 | 0 | 0 cigarettes per day | 15 to 22.5 cigarettes per day | 0.336472 | 0.103863 |
| diabetes | 309592 | 0 | 0 cigarettes per day | 1 to 14 cigarettes per day    | 0.385262 | 0.118006 |
| diabetes | 309610 | 0 | 0 cigarettes per day | 20 to 30 cigarettes per day   | 0.438255 | 0.014812 |
| diabetes | 309610 | 0 | 0 cigarettes per day | 20 to 30 cigarettes per day   | 0.582216 | 0.038479 |
| diabetes | 309610 | 0 | 0 cigarettes per day | 10 to 19 cigarettes per day   | 0.500775 | 0.103587 |
| diabetes | 309610 | 0 | 0 cigarettes per day | 10 to 19 cigarettes per day   | 0.457425 | 0.03875  |
| diabetes | 309610 | 0 | 0 cigarettes per day | 20 to 30 cigarettes per day   | 0.451076 | 0.165735 |
| diabetes | 309610 | 1 | 0 cigarettes per day | 1 to 9 cigarettes per day     | 0.405465 | 0.040816 |
| diabetes | 309610 | 0 | 0 cigarettes per day | 20 to 30 cigarettes per day   | 0.285179 | 0.072886 |
| diabetes | 309610 | 0 | 0 cigarettes per day | 10 to 19 cigarettes per day   | 0.314811 | 0.013034 |
| diabetes | 309610 | 0 | 0 cigarettes per day | 1 to 9 cigarettes per day     | 0.29267  | 0.036171 |
| diabetes | 309610 | 0 | 0 cigarettes per day | 1 to 9 cigarettes per day     | 0.357674 | 0.083845 |
| diabetes | 309610 | 1 | 0 cigarettes per day | 1 to 9 cigarettes per day     | 0.262364 | 0.013736 |
| diabetes | 309610 | 0 | 0 cigarettes per day | 10 to 19 cigarettes per day   | 0.231112 | 0.048591 |
| diabetes | 348079 | 0 | 0 cigarettes per day | 1 to 14 cigarettes per day    | 0.314811 | 0.309102 |
| diabetes | 348079 | 0 | 0 cigarettes per day | 25 to 37.5 cigarettes per day | 0.662688 | 0.234063 |
| diabetes | 348079 | 0 | 0 cigarettes per day | 15 to 24 cigarettes per day   | 0.8671   | 0.216515 |
| diabetes | 348081 | 0 | 0 cigarettes per day | 1 to 20 cigarettes per day    | 0.336472 | 0.147595 |
| diabetes | 348081 | 0 | 0 cigarettes per day | 31 to 46.5 cigarettes per day | 0.548121 | 0.188746 |
| diabetes | 348081 | 0 | 0 cigarettes per day | 21 to 30 cigarettes per day   | 0.336472 | 0.165816 |
| diabetes | 348083 | 0 | 0 cigarettes per day | 0 to 19 cigarettes per day    | 0.405465 | 0.204082 |
| diabetes | 348083 | 0 | 0 cigarettes per day | 20 to 30 cigarettes per day   | 0.530628 | 0.15006  |
| diabetes | 348085 | 0 | 0 cigarettes per day | 1 to 20 cigarettes per day    | 0.631272 | 0.582121 |
| diabetes | 348085 | 0 | 0 cigarettes per day | 21 to 30 cigarettes per day   | 1.105257 | 0.573557 |
| diabetes | 348085 | 0 | 0 cigarettes per day | 31 to 46.5 cigarettes per day | 1.408545 | 0.540766 |
| diabetes | 348088 | 0 | 0 cigarettes per day | 20 to 30 cigarettes per day   | 0.536493 | 0.18797  |
| diabetes | 348088 | 0 | 0 cigarettes per day | 1 to 19 cigarettes per day    | 0.582216 | 0.210922 |
| diabetes | 348091 | 0 | 0 cigarettes per day | 0 to 19 cigarettes per day    | 0.04879  | 0.114189 |
| diabetes | 348091 | 0 | 0 cigarettes per day | 20 to 30 cigarettes per day   | 0.494696 | 0.197549 |
| diabetes | 348100 | 0 | 0 cigarettes per day | 0 to 19 cigarettes per day    | 0.378436 | 0.103089 |

|          |        |   |                      |                               |          |          |
|----------|--------|---|----------------------|-------------------------------|----------|----------|
| diabetes | 348100 | 0 | 0 cigarettes per day | 0 to 19 cigarettes per day    | 0.329304 | 0.108281 |
| diabetes | 348100 | 0 | 0 cigarettes per day | 20 to 30 cigarettes per day   | 0.231112 | 0.044542 |
| diabetes | 348100 | 0 | 0 cigarettes per day | 20 to 30 cigarettes per day   | 0.322083 | 0.101671 |
| diabetes | 348105 | 0 | 0 cigarettes per day | 0 to 19 cigarettes per day    | 0.198851 | 0.081549 |
| diabetes | 348105 | 0 | 0 cigarettes per day | 0 to 19 cigarettes per day    | 0.378436 | 0.0961   |
| diabetes | 348105 | 0 | 0 cigarettes per day | 20 to 30 cigarettes per day   | 0.451076 | 0.081243 |
| diabetes | 348105 | 0 | 0 cigarettes per day | 20 to 30 cigarettes per day   | 0.625938 | 0.167794 |
| diabetes | 348108 | 0 | 0 cigarettes per day | 1 to 14 cigarettes per day    | 0.223144 | 0.35102  |
| diabetes | 348108 | 0 | 0 cigarettes per day | 15 to 19 cigarettes per day   | 0.29267  | 0.338867 |
| diabetes | 348108 | 0 | 0 cigarettes per day | 20 to 30 cigarettes per day   | 0.314811 | 0.314688 |
| diabetes | 348108 | 0 | 0 cigarettes per day | 1 to 14 cigarettes per day    | 0.392042 | 0.208563 |
| diabetes | 348108 | 0 | 0 cigarettes per day | 15 to 19 cigarettes per day   | 0.708036 | 0.306625 |
| diabetes | 348108 | 0 | 0 cigarettes per day | 20 to 30 cigarettes per day   | 0.741937 | 0.16035  |
| diabetes | 348112 | 0 | 0 cigarettes per day | 1 to 9 cigarettes per day     | 0.371564 | 0.628079 |
| diabetes | 356075 | 1 | 0 cigarettes per day | 0 to 19 cigarettes per day    | -0.0202  | 0.026031 |
| diabetes | 356075 | 0 | 0 cigarettes per day | 0 to 19 cigarettes per day    | 0.04879  | 0.034014 |
| diabetes | 356075 | 1 | 0 cigarettes per day | 20 to 39 cigarettes per day   | 0.173953 | 0.027868 |
| diabetes | 356075 | 0 | 0 cigarettes per day | 20 to 39 cigarettes per day   | 0.19062  | 0.031624 |
| diabetes | 356075 | 0 | 0 cigarettes per day | 40 to 60 cigarettes per day   | 0.371564 | 0.040464 |
| diabetes | 356075 | 0 | 0 cigarettes per day | 40 to 60 cigarettes per day   | 0.553885 | 0.07917  |
| diabetes | 356095 | 0 | 0 cigarettes per day | 1 to 10 cigarettes per day    | 0.270027 | 0.093473 |
| diabetes | 356095 | 0 | 0 cigarettes per day | 11 to 20 cigarettes per day   | 0.307485 | 0.056273 |
| diabetes | 356095 | 0 | 0 cigarettes per day | 21 to 31.5 cigarettes per day | 0.405465 | 0.093537 |
| diabetes | 356097 | 0 | 0 cigarettes per day | 20 to 29 cigarettes per day   | 0.518794 | 0.224733 |
| diabetes | 356097 | 0 | 0 cigarettes per day | 30 to 45 cigarettes per day   | 0.832909 | 0.236247 |
| diabetes | 356099 | 1 | 0 cigarettes per day | 1 to 19 cigarettes per day    | -0.21072 | 0.085034 |
| diabetes | 356099 | 1 | 0 cigarettes per day | 20 to 30 cigarettes per day   | -0.22314 | 0.082908 |
| diabetes | 356101 | 0 | 0 cigarettes per day | 0 to 19 cigarettes per day    | 0.086178 | 0.231698 |
| diabetes | 356101 | 0 | 0 cigarettes per day | 20 to 30 cigarettes per day   | 0.536493 | 0.361022 |
| diabetes | 356101 | 0 | 0 cigarettes per day | 20 to 30 cigarettes per day   | 0.565314 | 0.647901 |
| diabetes | 356101 | 0 | 0 cigarettes per day | 0 to 19 cigarettes per day    | 0.565314 | 0.239158 |
| diabetes | 356103 | 0 | 0 cigarettes per day | 15 to 24 cigarettes per day   | 0.24686  | 0.145488 |
| diabetes | 356103 | 0 | 0 cigarettes per day | 25 to 37.5 cigarettes per day | 0.182322 | 0.055272 |
| diabetes | 356103 | 0 | 0 cigarettes per day | 0 to 14 cigarettes per day    | 0.173953 | 0.083605 |
| diabetes | 356103 | 0 | 0 cigarettes per day | 26 to 39 cigarettes per day   | 0.157004 | 0.390284 |
| diabetes | 356103 | 0 | 0 cigarettes per day | 26 to 39 cigarettes per day   | 0.173953 | 0.05788  |
| diabetes | 356103 | 1 | 0 cigarettes per day | 15 to 24 cigarettes per day   | 0.019803 | 0.045018 |
| diabetes | 356103 | 0 | 0 cigarettes per day | 0 to 14 cigarettes per day    | 0        | 0.053571 |
| diabetes | 356103 | 1 | 0 cigarettes per day | 15 to 24 cigarettes per day   | -0.01005 | 0.048959 |
| diabetes | 356103 | 0 | 0 cigarettes per day | 0 to 14 cigarettes per day    | 0.058269 | 0.045726 |
| diabetes | 356105 | 0 | 0 cigarettes per day | 0 to 19 cigarettes per day    | 0.239017 | 0.064278 |
| diabetes | 356105 | 0 | 0 cigarettes per day | 0 to 19 cigarettes per day    | 0.357674 | 0.074925 |
| diabetes | 356105 | 0 | 0 cigarettes per day | 20 to 30 cigarettes per day   | 0.609766 | 0.091504 |



|                   |        |   |                      |                             |          |          |
|-------------------|--------|---|----------------------|-----------------------------|----------|----------|
| diabetes          | 356105 | 0 | 0 cigarettes per day | 20 to 30 cigarettes per day | 0.636577 | 0.079635 |
| diabetes          | 413800 | 0 | 0 cigarettes per day | 0 to 9 cigarettes per day   | 0.262364 | 0.431711 |
| diabetes          | 413800 | 0 | 0 cigarettes per day | 10 to 15 cigarettes per day | 1.029619 | 0.610423 |
| diabetes          | 502053 | 1 | 0 cigarettes per day | 20 to 40 cigarettes per day | 0.277632 | 0.011598 |
| diabetes          | 502053 | 0 | 0 cigarettes per day | 1 to 20 cigarettes per day  | 0.165514 | 0.019549 |
| diabetes          | 502053 | 0 | 0 cigarettes per day | 40 to 60 cigarettes per day | 0.431782 | 0.01156  |
| diabetes          | 502177 | 0 | 0 cigarettes per day | 1 to 19 cigarettes per day  | -0.01005 | 0.213329 |
| diabetes          | 502177 | 0 | 0 cigarettes per day | 20 to 30 cigarettes per day | 0.512824 | 0.22942  |
| esophageal_cancer | 298512 | 0 | 0 pack-years         | 0 to 19 pack-years          | 0.727549 | 0.361086 |
| esophageal_cancer | 298512 | 0 | 0 pack-years         | 20 to 29 pack-years         | 0.996949 | 0.34547  |
| esophageal_cancer | 298512 | 0 | 0 pack-years         | 30 to 39 pack-years         | 1.088562 | 0.332406 |
| esophageal_cancer | 298512 | 0 | 0 pack-years         | 40 to 60 pack-years         | 1.570697 | 0.308138 |
| esophageal_cancer | 309841 | 0 | 0 pack-years         | 0 to 9 pack-years           | -0.22314 | 0.414541 |
| esophageal_cancer | 309841 | 0 | 0 pack-years         | 0 to 14 pack-years          | 0        | 0.280612 |
| esophageal_cancer | 309841 | 0 | 0 pack-years         | 15 to 34 pack-years         | 0.587787 | 0.212585 |
| esophageal_cancer | 309841 | 0 | 0 pack-years         | 10 to 15 pack-years         | 0.875469 | 0.28699  |
| esophageal_cancer | 309841 | 0 | 0 pack-years         | 35 to 52.5 pack-years       | 1.335001 | 0.20811  |
| esophageal_cancer | 328266 | 0 | 0 pack-years         | 20 to 40 pack-years         | 0.741937 | 0.619534 |
| esophageal_cancer | 328339 | 0 | 0 pack-years         | 20 to 39 pack-years         | 1.48614  | 0.343984 |
| esophageal_cancer | 328339 | 0 | 0 pack-years         | 60 to 90 pack-years         | 1.477049 | 0.484577 |
| esophageal_cancer | 328339 | 0 | 0 pack-years         | 20 to 39 pack-years         | 1.22083  | 1.900849 |
| esophageal_cancer | 328339 | 0 | 0 pack-years         | 0 to 19 pack-years          | 0.698135 | 0.552087 |
| esophageal_cancer | 328339 | 0 | 0 pack-years         | 0 to 19 pack-years          | 0.506818 | 1.902508 |
| esophageal_cancer | 328339 | 0 | 0 pack-years         | 40 to 59 pack-years         | 1.115142 | 0.384744 |
| esophageal_cancer | 339730 | 0 | 0 pack-years         | 16.64 to 32.02 pack-years   | 0.815365 | 1.365812 |
| esophageal_cancer | 339730 | 0 | 0 pack-years         | 32.03 to 48.045 pack-years  | 1.701105 | 2.201884 |
| esophageal_cancer | 343383 | 0 | 0 pack-years         | 1 to 39 pack-years          | 1.648659 | 0.575098 |
| esophageal_cancer | 343383 | 0 | 0 pack-years         | 40 to 79 pack-years         | 2.066863 | 0.52703  |
| esophageal_cancer | 343383 | 0 | 0 pack-years         | 80 to 100 pack-years        | 2.827314 | 0.720553 |
| esophageal_cancer | 343580 | 0 | 0 pack-years         | 75.05 to 112.5 pack-years   | 1.029619 | 0.493071 |
| esophageal_cancer | 343580 | 0 | 0 pack-years         | 50.05 to 75 pack-years      | 1.131402 | 0.48075  |
| esophageal_cancer | 343580 | 0 | 0 pack-years         | 0.05 to 25 pack-years       | 0.530628 | 0.525099 |
| esophageal_cancer | 343580 | 0 | 0 pack-years         | 25.05 to 50 pack-years      | 0.832909 | 0.475311 |
| esophageal_cancer | 345310 | 0 | 0 pack-years         | 1 to 19.9 pack-years        | 1.175573 | 0.695232 |
| esophageal_cancer | 345310 | 0 | 0 pack-years         | 30 to 39.9 pack-years       | 1.348073 | 0.536708 |
| esophageal_cancer | 345310 | 0 | 0 pack-years         | 40 to 60 pack-years         | 1.581038 | 0.47766  |
| esophageal_cancer | 345310 | 0 | 0 pack-years         | 20 to 29.9 pack-years       | 1.587192 | 0.526376 |
| esophageal_cancer | 345324 | 1 | 0 pack-years         | 0 to 50 pack-years          | 1.983756 | 0.474763 |
| esophageal_cancer | 345324 | 0 | 0 pack-years         | 51 to 76.5 pack-years       | 2.844909 | 0.564932 |
| esophageal_cancer | 345328 | 0 | 0 pack-years         | 30 to 45 pack-years         | 1.633154 | 0.474962 |
| esophageal_cancer | 345328 | 0 | 0 pack-years         | 1 to 29 pack-years          | 1.358409 | 0.379211 |
| esophageal_cancer | 439528 | 0 | 0 pack-years         | 30 to 45 pack-years         | 0.647103 | 0.038706 |
| esophageal_cancer | 439528 | 0 | 0 pack-years         | 1 to 29 pack-years          | 0.392042 | 0.043048 |

|                      |        |   |                      |                               |          |          |
|----------------------|--------|---|----------------------|-------------------------------|----------|----------|
| esophageal_cancer    | 500795 | 0 | 0 pack-years         | 1 to 5 pack-years             | 0.182322 | 0.20687  |
| esophageal_cancer    | 500795 | 0 | 0 pack-years         | 5 to 9 pack-years             | 0.09531  | 0.254727 |
| esophageal_cancer    | 500795 | 0 | 0 pack-years         | 15 to 22.5 pack-years         | 0.587787 | 0.247296 |
| esophageal_cancer    | 502130 | 0 | 0 pack-years         | 10 to 19 pack-years           | 0.122218 | 1.036997 |
| esophageal_cancer    | 502130 | 0 | 0 pack-years         | 20 to 29 pack-years           | 1.261298 | 0.644523 |
| esophageal_cancer    | 502130 | 0 | 0 pack-years         | 30 to 45 pack-years           | 1.774952 | 0.474365 |
| esophageal_cancer    | 502488 | 1 | 0.1 pack-years       | 2 to 2.9 pack-years           | 2.047693 | 0.716361 |
| esophageal_cancer    | 502488 | 1 | 0.1 pack-years       | 3 to 4.5 pack-years           | 1.7613   | 0.784888 |
| gallbladder_diseases | 350721 | 0 | 0 cigarettes per day | 15 to 24 cigarettes per day   | 0.029559 | 0.071825 |
| gallbladder_diseases | 350721 | 0 | 0 cigarettes per day | 1 to 14 cigarettes per day    | 0.09531  | 0.083488 |
| gallbladder_diseases | 350721 | 0 | 0 cigarettes per day | 25 to 34 cigarettes per day   | 0.270027 | 0.09542  |
| gallbladder_diseases | 350721 | 0 | 0 cigarettes per day | 35 to 52.5 cigarettes per day | 0.41211  | 0.11657  |
| gallbladder_diseases | 350723 | 0 | 0 cigarettes per day | 1 to 9 cigarettes per day     | 0.113329 | 0.031888 |
| gallbladder_diseases | 350723 | 0 | 0 cigarettes per day | 10 to 19 cigarettes per day   | 0.207014 | 0.022814 |
| gallbladder_diseases | 350723 | 0 | 0 cigarettes per day | 20 to 30 cigarettes per day   | 0.254642 | 0.029663 |
| gallbladder_diseases | 350725 | 0 | 0 cigarettes per day | 20 to 30 cigarettes per day   | 0.41871  | 0.203075 |
| gallbladder_diseases | 351491 | 0 | 0 cigarettes per day | 15 to 22.5 cigarettes per day | 0.647103 | 0.126883 |
| gallbladder_diseases | 351491 | 1 | 0 cigarettes per day | 1 to 14 cigarettes per day    | 0.698135 | 0.120571 |
| hip_fracture         | 132098 | 0 | NA                   | NA                            | 0.307485 | 0.172848 |
| hip_fracture         | 132098 | 0 | NA                   | NA                            | 0.113329 | 0.258061 |
| hip_fracture         | 165283 | 0 | NA                   | NA                            | -0.24846 | 0.274394 |
| hip_fracture         | 261365 | 0 | NA                   | NA                            | 0.587787 | 0.225099 |
| hip_fracture         | 261365 | 0 | NA                   | NA                            | 0.587787 | 0.197242 |
| hip_fracture         | 261375 | 0 | NA                   | NA                            | 0.307485 | 0.098838 |
| hip_fracture         | 261375 | 0 | NA                   | NA                            | 0.463734 | 0.216498 |
| hip_fracture         | 261377 | 0 | NA                   | NA                            | 0.604316 | 0.171908 |
| hip_fracture         | 261377 | 0 | NA                   | NA                            | 0.802002 | 0.390152 |
| hip_fracture         | 261381 | 0 | NA                   | NA                            | 0.788457 | 0.353647 |
| hip_fracture         | 261381 | 0 | NA                   | NA                            | 0.875469 | 0.342789 |
| hip_fracture         | 261387 | 0 | NA                   | NA                            | 0.076961 | 0.459964 |
| hip_fracture         | 261399 | 0 | NA                   | NA                            | -0.31471 | 0.565197 |
| hip_fracture         | 261399 | 0 | NA                   | NA                            | -0.31471 | 0.565197 |
| hip_fracture         | 261411 | 0 | NA                   | NA                            | 0.371564 | 0.263926 |
| hip_fracture         | 261418 | 0 | NA                   | NA                            | 0.336472 | 0.239354 |
| hip_fracture         | 261424 | 0 | NA                   | NA                            | 0.198851 | 0.240374 |
| hip_fracture         | 261426 | 0 | NA                   | NA                            | 0.530628 | 0.209434 |
| hip_fracture         | 261429 | 0 | NA                   | NA                            | 0.113329 | 0.093807 |
| hip_fracture         | 261429 | 0 | NA                   | NA                            | 0.04879  | 0.210887 |
| hip_fracture         | 261433 | 0 | NA                   | NA                            | 0.176471 | 0.349905 |
| hip_fracture         | 261473 | 0 | NA                   | NA                            | 0.04879  | 0.214558 |
| hip_fracture         | 261498 | 0 | NA                   | NA                            | 0.09531  | 0.142759 |
| hip_fracture         | 315458 | 0 | NA                   | NA                            | 0.756122 | 0.333323 |
| hip_fracture         | 315458 | 0 | NA                   | NA                            | 0.438255 | 0.422302 |

|              |        |   |    |    |          |          |
|--------------|--------|---|----|----|----------|----------|
| hip_fracture | 394006 | 0 | NA | NA | 0.524729 | 0.193836 |
| hip_fracture | 394006 | 0 | NA | NA | 0.122218 | 0.062975 |
| hip_fracture | 394006 | 0 | NA | NA | 0.00995  | 0.075578 |
| hip_fracture | 394006 | 0 | NA | NA | 0.398776 | 0.109042 |
| hip_fracture | 394006 | 0 | NA | NA | 0.431782 | 0.121737 |
| hip_fracture | 394006 | 0 | NA | NA | 0.122218 | 0.054386 |
| hip_fracture | 394006 | 0 | NA | NA | 0.438255 | 0.147737 |
| hip_fracture | 394006 | 0 | NA | NA | 0.019803 | 0.06474  |
| hip_fracture | 394006 | 0 | NA | NA | 0.470004 | 0.118388 |
| hip_fracture | 414192 | 0 | NA | NA | 1.128171 | 0.317378 |
| hip_fracture | 414192 | 0 | NA | NA | 0.71784  | 0.339921 |
| hip_fracture | 414194 | 1 | NA | NA | 1.477049 | 0.385339 |
| hip_fracture | 414201 | 0 | NA | NA | 0.29267  | 0.155328 |
| hip_fracture | 414201 | 0 | NA | NA | 0.385262 | 0.170676 |
| hip_fracture | 414201 | 0 | NA | NA | 0.916291 | 0.233748 |
| hip_fracture | 414201 | 0 | NA | NA | -0.19845 | 0.345939 |
| hip_fracture | 414201 | 0 | NA | NA | 0.113329 | 0.284213 |
| hip_fracture | 414201 | 0 | NA | NA | 0.207014 | 0.421664 |
| hip_fracture | 414206 | 0 | NA | NA | 0.845868 | 0.158262 |
| hip_fracture | 414208 | 0 | NA | NA | 0.774727 | 0.246375 |
| hip_fracture | 414210 | 1 | NA | NA | -0.37106 | 0.263102 |
| hip_fracture | 414210 | 0 | NA | NA | -0.37106 | 0.604994 |
| hip_fracture | 414210 | 0 | NA | NA | -0.23572 | 0.400452 |
| hip_fracture | 414212 | 0 | NA | NA | 0.788457 | 0.273632 |
| hip_fracture | 414212 | 0 | NA | NA | 0.741937 | 0.753804 |
| hip_fracture | 414212 | 0 | NA | NA | 0.832909 | 0.254727 |
| hip_fracture | 414212 | 0 | NA | NA | 1.163151 | 0.762389 |
| hip_fracture | 414214 | 0 | NA | NA | 0.262364 | 0.258061 |
| hip_fracture | 414214 | 0 | NA | NA | 0.405465 | 0.260625 |
| hip_fracture | 414220 | 0 | NA | NA | 0.300105 | 0.097288 |
| hip_fracture | 414223 | 0 | NA | NA | 0.912283 | 0.221079 |
| hip_fracture | 414225 | 1 | NA | NA | 1.722767 | 0.574309 |
| hip_fracture | 414227 | 0 | NA | NA | 0.002996 | 0.447524 |
| hip_fracture | 414227 | 0 | NA | NA | -0.15082 | 0.329899 |
| hip_fracture | 414227 | 1 | NA | NA | -0.27444 | 0.210249 |
| hip_fracture | 414229 | 0 | NA | NA | 0.788457 | 0.53832  |
| hip_fracture | 498367 | 0 | NA | NA | 0.804241 | 0.206508 |
| hip_fracture | 498378 | 0 | NA | NA | 0.936093 | 0.276764 |
| hip_fracture | 498383 | 0 | NA | NA | 0.530628 | 0.625256 |
| hip_fracture | 498389 | 1 | NA | NA | -0.69315 | 0.216147 |
| hip_fracture | 498389 | 0 | NA | NA | -0.35667 | 0.176823 |
| hip_fracture | 498391 | 0 | NA | NA | 0.24686  | 0.348693 |
| hip_fracture | 498391 | 0 | NA | NA | 0.24686  | 0.274525 |

|              |        |   |    |    |          |          |
|--------------|--------|---|----|----|----------|----------|
| hip_fracture | 498391 | 0 | NA | NA | 0.41211  | 0.329978 |
| hip_fracture | 498391 | 0 | NA | NA | 0.086178 | 0.277544 |
| hip_fracture | 498392 | 0 | NA | NA | 0.392042 | 0.141454 |
| hip_fracture | 498392 | 0 | NA | NA | 0.198851 | 0.111968 |
| hip_fracture | 498396 | 0 | NA | NA | 0.741937 | 0.229792 |
| hip_fracture | 498406 | 0 | NA | NA | 0.24686  | 0.22617  |
| hip_fracture | 498406 | 0 | NA | NA | 0.722706 | 0.259553 |
| hip_fracture | 498406 | 0 | NA | NA | -0.08338 | 0.159087 |
| hip_fracture | 498406 | 0 | NA | NA | 0.314811 | 0.475311 |
| hip_fracture | 498406 | 0 | NA | NA | 0.371564 | 0.117111 |
| hip_fracture | 498406 | 0 | NA | NA | 0.559616 | 0.12013  |
| hip_fracture | 498410 | 0 | NA | NA | 0.405465 | 0.18927  |
| hip_fracture | 498418 | 1 | NA | NA | 1.108563 | 0.31012  |
| hip_fracture | 498418 | 1 | NA | NA | 0.996949 | 0.192127 |
| hip_fracture | 498421 | 0 | NA | NA | 0.672944 | 0.149366 |
| hip_fracture | 498421 | 0 | NA | NA | 0.039221 | 0.09245  |
| hip_fracture | 498421 | 0 | NA | NA | 0.113329 | 0.063538 |
| hip_fracture | 498421 | 0 | NA | NA | 0.113329 | 0.152663 |
| hip_fracture | 498421 | 0 | NA | NA | 0.336472 | 0.187132 |
| hip_fracture | 498421 | 0 | NA | NA | 0.223144 | 0.057384 |
| hip_fracture | 498421 | 0 | NA | NA | 0.615186 | 0.1378   |
| hip_fracture | 498421 | 0 | NA | NA | 0.131028 | 0.186331 |
| hip_fracture | 498421 | 0 | NA | NA | 0.457425 | 0.19615  |
| hip_fracture | 498421 | 0 | NA | NA | 0.165514 | 0.130873 |
| hip_fracture | 498421 | 0 | NA | NA | 0.760806 | 0.175977 |
| hip_fracture | 498421 | 0 | NA | NA | 0.113329 | 0.115563 |
| hip_fracture | 498427 | 0 | NA | NA | -0.06188 | 0.219117 |
| hip_fracture | 498442 | 0 | NA | NA | 0.444045 | 0.313528 |
| hip_fracture | 498444 | 1 | NA | NA | 1.506962 | 0.025597 |
| hip_fracture | 498444 | 1 | NA | NA | 1.542015 | 0.031475 |
| hip_fracture | 498446 | 0 | NA | NA | 0.390013 | 0.18977  |
| hip_fracture | 498453 | 0 | NA | NA | 0.09531  | 0.17187  |
| hip_fracture | 501885 | 0 | NA | NA | 0.778774 | 0.137214 |
| hip_fracture | 501885 | 0 | NA | NA | 0.162799 | 0.156121 |
| hip_fracture | 501889 | 0 | NA | NA | 0.211314 | 0.096016 |
| hip_fracture | 501889 | 1 | NA | NA | -0.26945 | 0.081555 |
| hip_fracture | 501903 | 0 | NA | NA | 0.14842  | 0.028496 |
| hip_fracture | 501925 | 0 | NA | NA | 0.336472 | 0.188392 |
| hip_fracture | 501925 | 0 | NA | NA | 0.48858  | 0.368541 |
| hip_fracture | 501929 | 0 | NA | NA | 0.198851 | 0.144339 |
| hip_fracture | 501929 | 0 | NA | NA | 0.378436 | 0.223334 |
| hip_fracture | 501938 | 1 | NA | NA | -0.35027 | 0.01318  |
| hip_fracture | 501938 | 1 | NA | NA | -0.31334 | 0.019259 |

|              |        |   |    |    |          |          |
|--------------|--------|---|----|----|----------|----------|
| hip_fracture | 501938 | 0 | NA | NA | 0.339468 | 0.046156 |
| hip_fracture | 501952 | 0 | NA | NA | 0.405465 | 0.138244 |
| hip_fracture | 501954 | 0 | NA | NA | 0.39346  | 0.111003 |
| hip_fracture | 501956 | 0 | NA | NA | 0.584615 | 0.301446 |
| hip_fracture | 501960 | 0 | NA | NA | -0.09475 | 0.163795 |
| hip_fracture | 501967 | 0 | NA | NA | 0.506818 | 0.131109 |
| hip_fracture | 501969 | 0 | NA | NA | 0.076127 | 0.032036 |
| hip_fracture | 132098 | 0 | NA | NA | 0.307485 | 0.172848 |
| hip_fracture | 132098 | 0 | NA | NA | 0.113329 | 0.258061 |
| hip_fracture | 165283 | 0 | NA | NA | -0.24846 | 0.274394 |
| hip_fracture | 261365 | 0 | NA | NA | 0.587787 | 0.225099 |
| hip_fracture | 261365 | 0 | NA | NA | 0.587787 | 0.197242 |
| hip_fracture | 261375 | 0 | NA | NA | 0.307485 | 0.098838 |
| hip_fracture | 261375 | 0 | NA | NA | 0.463734 | 0.216498 |
| hip_fracture | 261377 | 0 | NA | NA | 0.604316 | 0.171908 |
| hip_fracture | 261377 | 0 | NA | NA | 0.802002 | 0.390152 |
| hip_fracture | 261381 | 0 | NA | NA | 0.788457 | 0.353647 |
| hip_fracture | 261381 | 0 | NA | NA | 0.875469 | 0.342789 |
| hip_fracture | 261387 | 0 | NA | NA | 0.076961 | 0.459964 |
| hip_fracture | 261399 | 0 | NA | NA | -0.31471 | 0.565197 |
| hip_fracture | 261399 | 0 | NA | NA | -0.31471 | 0.565197 |
| hip_fracture | 261411 | 0 | NA | NA | 0.371564 | 0.263926 |
| hip_fracture | 261418 | 0 | NA | NA | 0.336472 | 0.239354 |
| hip_fracture | 261424 | 0 | NA | NA | 0.198851 | 0.240374 |
| hip_fracture | 261426 | 0 | NA | NA | 0.530628 | 0.209434 |
| hip_fracture | 261429 | 0 | NA | NA | 0.113329 | 0.093807 |
| hip_fracture | 261429 | 0 | NA | NA | 0.04879  | 0.210887 |
| hip_fracture | 261433 | 0 | NA | NA | 0.176471 | 0.349905 |
| hip_fracture | 261473 | 0 | NA | NA | 0.04879  | 0.214558 |
| hip_fracture | 261498 | 0 | NA | NA | 0.09531  | 0.142759 |
| hip_fracture | 315458 | 0 | NA | NA | 0.756122 | 0.333323 |
| hip_fracture | 315458 | 0 | NA | NA | 0.438255 | 0.422302 |
| hip_fracture | 394006 | 0 | NA | NA | 0.524729 | 0.193836 |
| hip_fracture | 394006 | 0 | NA | NA | 0.122218 | 0.062975 |
| hip_fracture | 394006 | 0 | NA | NA | 0.00995  | 0.075578 |
| hip_fracture | 394006 | 0 | NA | NA | 0.398776 | 0.109042 |
| hip_fracture | 394006 | 0 | NA | NA | 0.431782 | 0.121737 |
| hip_fracture | 394006 | 0 | NA | NA | 0.122218 | 0.054386 |
| hip_fracture | 394006 | 0 | NA | NA | 0.438255 | 0.147737 |
| hip_fracture | 394006 | 0 | NA | NA | 0.019803 | 0.06474  |
| hip_fracture | 394006 | 0 | NA | NA | 0.470004 | 0.118388 |
| hip_fracture | 414192 | 0 | NA | NA | 1.128171 | 0.317378 |
| hip_fracture | 414192 | 0 | NA | NA | 0.71784  | 0.339921 |

|              |        |   |    |    |          |          |
|--------------|--------|---|----|----|----------|----------|
| hip_fracture | 414194 | 1 | NA | NA | 1.477049 | 0.385339 |
| hip_fracture | 414201 | 0 | NA | NA | 0.29267  | 0.155328 |
| hip_fracture | 414201 | 0 | NA | NA | 0.385262 | 0.170676 |
| hip_fracture | 414201 | 0 | NA | NA | 0.916291 | 0.233748 |
| hip_fracture | 414201 | 0 | NA | NA | -0.19845 | 0.345939 |
| hip_fracture | 414201 | 0 | NA | NA | 0.113329 | 0.284213 |
| hip_fracture | 414201 | 0 | NA | NA | 0.207014 | 0.421664 |
| hip_fracture | 414206 | 0 | NA | NA | 0.845868 | 0.158262 |
| hip_fracture | 414208 | 0 | NA | NA | 0.774727 | 0.246375 |
| hip_fracture | 414210 | 1 | NA | NA | -0.37106 | 0.263102 |
| hip_fracture | 414210 | 0 | NA | NA | -0.37106 | 0.604994 |
| hip_fracture | 414210 | 0 | NA | NA | -0.23572 | 0.400452 |
| hip_fracture | 414212 | 0 | NA | NA | 0.788457 | 0.273632 |
| hip_fracture | 414212 | 0 | NA | NA | 0.741937 | 0.753804 |
| hip_fracture | 414212 | 0 | NA | NA | 0.832909 | 0.254727 |
| hip_fracture | 414212 | 0 | NA | NA | 1.163151 | 0.762389 |
| hip_fracture | 414214 | 0 | NA | NA | 0.262364 | 0.258061 |
| hip_fracture | 414214 | 0 | NA | NA | 0.405465 | 0.260625 |
| hip_fracture | 414220 | 0 | NA | NA | 0.300105 | 0.097288 |
| hip_fracture | 414223 | 0 | NA | NA | 0.912283 | 0.221079 |
| hip_fracture | 414225 | 1 | NA | NA | 1.722767 | 0.574309 |
| hip_fracture | 414227 | 0 | NA | NA | 0.002996 | 0.447524 |
| hip_fracture | 414227 | 0 | NA | NA | -0.15082 | 0.329899 |
| hip_fracture | 414227 | 1 | NA | NA | -0.27444 | 0.210249 |
| hip_fracture | 414229 | 0 | NA | NA | 0.788457 | 0.53832  |
| hip_fracture | 498367 | 0 | NA | NA | 0.804241 | 0.206508 |
| hip_fracture | 498378 | 0 | NA | NA | 0.936093 | 0.276764 |
| hip_fracture | 498383 | 0 | NA | NA | 0.530628 | 0.625256 |
| hip_fracture | 498389 | 1 | NA | NA | -0.69315 | 0.216147 |
| hip_fracture | 498389 | 0 | NA | NA | -0.35667 | 0.176823 |
| hip_fracture | 498391 | 0 | NA | NA | 0.24686  | 0.348693 |
| hip_fracture | 498391 | 0 | NA | NA | 0.24686  | 0.274525 |
| hip_fracture | 498391 | 0 | NA | NA | 0.41211  | 0.329978 |
| hip_fracture | 498391 | 0 | NA | NA | 0.086178 | 0.277544 |
| hip_fracture | 498392 | 0 | NA | NA | 0.392042 | 0.141454 |
| hip_fracture | 498392 | 0 | NA | NA | 0.198851 | 0.111968 |
| hip_fracture | 498396 | 0 | NA | NA | 0.741937 | 0.229792 |
| hip_fracture | 498406 | 0 | NA | NA | 0.24686  | 0.22617  |
| hip_fracture | 498406 | 0 | NA | NA | 0.722706 | 0.259553 |
| hip_fracture | 498406 | 0 | NA | NA | -0.08338 | 0.159087 |
| hip_fracture | 498406 | 0 | NA | NA | 0.314811 | 0.475311 |
| hip_fracture | 498406 | 0 | NA | NA | 0.371564 | 0.117111 |
| hip_fracture | 498406 | 0 | NA | NA | 0.559616 | 0.12013  |

|              |        |   |                      |                               |          |          |
|--------------|--------|---|----------------------|-------------------------------|----------|----------|
| hip_fracture | 498410 | 0 | NA                   | NA                            | 0.405465 | 0.18927  |
| hip_fracture | 498418 | 1 | NA                   | NA                            | 1.108563 | 0.31012  |
| hip_fracture | 498418 | 1 | NA                   | NA                            | 0.996949 | 0.192127 |
| hip_fracture | 498421 | 0 | NA                   | NA                            | 0.672944 | 0.149366 |
| hip_fracture | 498421 | 0 | NA                   | NA                            | 0.039221 | 0.09245  |
| hip_fracture | 498421 | 0 | NA                   | NA                            | 0.113329 | 0.063538 |
| hip_fracture | 498421 | 0 | NA                   | NA                            | 0.113329 | 0.152663 |
| hip_fracture | 498421 | 0 | NA                   | NA                            | 0.336472 | 0.187132 |
| hip_fracture | 498421 | 0 | NA                   | NA                            | 0.223144 | 0.057384 |
| hip_fracture | 498421 | 0 | NA                   | NA                            | 0.615186 | 0.1378   |
| hip_fracture | 498421 | 0 | NA                   | NA                            | 0.131028 | 0.186331 |
| hip_fracture | 498421 | 0 | NA                   | NA                            | 0.457425 | 0.19615  |
| hip_fracture | 498421 | 0 | NA                   | NA                            | 0.165514 | 0.130873 |
| hip_fracture | 498421 | 0 | NA                   | NA                            | 0.760806 | 0.175977 |
| hip_fracture | 498421 | 0 | NA                   | NA                            | 0.113329 | 0.115563 |
| hip_fracture | 498427 | 0 | NA                   | NA                            | -0.06188 | 0.219117 |
| hip_fracture | 498442 | 0 | NA                   | NA                            | 0.444045 | 0.313528 |
| hip_fracture | 498444 | 1 | NA                   | NA                            | 1.506962 | 0.025597 |
| hip_fracture | 498444 | 1 | NA                   | NA                            | 1.542015 | 0.031475 |
| hip_fracture | 498446 | 0 | NA                   | NA                            | 0.390013 | 0.18977  |
| hip_fracture | 498453 | 0 | NA                   | NA                            | 0.09531  | 0.17187  |
| hip_fracture | 501885 | 0 | NA                   | NA                            | 0.778774 | 0.137214 |
| hip_fracture | 501885 | 0 | NA                   | NA                            | 0.162799 | 0.156121 |
| hip_fracture | 501889 | 0 | NA                   | NA                            | 0.211314 | 0.096016 |
| hip_fracture | 501889 | 1 | NA                   | NA                            | -0.26945 | 0.081555 |
| hip_fracture | 501903 | 0 | NA                   | NA                            | 0.14842  | 0.028496 |
| hip_fracture | 501925 | 0 | NA                   | NA                            | 0.336472 | 0.188392 |
| hip_fracture | 501925 | 0 | NA                   | NA                            | 0.48858  | 0.368541 |
| hip_fracture | 501929 | 0 | NA                   | NA                            | 0.198851 | 0.144339 |
| hip_fracture | 501929 | 0 | NA                   | NA                            | 0.378436 | 0.223334 |
| hip_fracture | 501938 | 1 | NA                   | NA                            | -0.35027 | 0.01318  |
| hip_fracture | 501938 | 1 | NA                   | NA                            | -0.31334 | 0.019259 |
| hip_fracture | 501938 | 0 | NA                   | NA                            | 0.339468 | 0.046156 |
| hip_fracture | 501952 | 0 | NA                   | NA                            | 0.405465 | 0.138244 |
| hip_fracture | 501954 | 0 | NA                   | NA                            | 0.39346  | 0.111003 |
| hip_fracture | 501956 | 0 | NA                   | NA                            | 0.584615 | 0.301446 |
| hip_fracture | 501960 | 0 | NA                   | NA                            | -0.09475 | 0.163795 |
| hip_fracture | 501967 | 0 | NA                   | NA                            | 0.506818 | 0.131109 |
| hip_fracture | 501969 | 0 | NA                   | NA                            | 0.076127 | 0.032036 |
| ihd          | 165539 | 0 | 0 cigarettes per day | 1 to 9 cigarettes per day     | 0.182322 | 0.095663 |
| ihd          | 165539 | 0 | 0 cigarettes per day | 10 to 15 cigarettes per day   | 0.587787 | 0.070862 |
| ihd          | 174238 | 0 | 0 cigarettes per day | 25 to 37.5 cigarettes per day | 0.587787 | 1.346372 |
| ihd          | 236194 | 0 | 0 cigarettes per day | 1 to 4 cigarettes per day     | 0.97456  | 0.140547 |

|     |        |   |                      |                               |          |          |
|-----|--------|---|----------------------|-------------------------------|----------|----------|
| ihd | 236194 | 0 | 0 cigarettes per day | 5 to 9 cigarettes per day     | 0.982078 | 0.088856 |
| ihd | 236194 | 0 | 0 cigarettes per day | 1 to 4 cigarettes per day     | 1.033184 | 0.27689  |
| ihd | 236194 | 1 | 0 cigarettes per day | 10 to 14 cigarettes per day   | 1.175573 | 0.073224 |
| ihd | 236194 | 0 | 0 cigarettes per day | 5 to 9 cigarettes per day     | 1.305626 | 0.163155 |
| ihd | 236194 | 0 | 0 cigarettes per day | 26 to 39 cigarettes per day   | 1.358409 | 0.973847 |
| ihd | 236194 | 1 | 0 cigarettes per day | 15 to 19 cigarettes per day   | 1.358409 | 0.077383 |
| ihd | 236194 | 0 | 0 cigarettes per day | 10 to 14 cigarettes per day   | 1.393766 | 0.158885 |
| ihd | 236194 | 0 | 0 cigarettes per day | 26 to 39 cigarettes per day   | 1.403643 | 0.10718  |
| ihd | 236194 | 1 | 0 cigarettes per day | 20 to 24 cigarettes per day   | 1.410987 | 0.082753 |
| ihd | 236194 | 0 | 0 cigarettes per day | 20 to 24 cigarettes per day   | 1.506297 | 0.315625 |
| ihd | 236194 | 0 | 0 cigarettes per day | 15 to 19 cigarettes per day   | 1.757858 | 0.204521 |
| ihd | 236197 | 1 | 0 cigarettes per day | 21 to 31.5 cigarettes per day | 1.778336 | 0.034904 |
| ihd | 236197 | 1 | 0 cigarettes per day | 1 to 9 cigarettes per day     | 1.160021 | 0.10396  |
| ihd | 236197 | 1 | 0 cigarettes per day | 10 to 19 cigarettes per day   | 1.515127 | 0.026912 |
| ihd | 249384 | 1 | 0 cigarettes per day | 10 to 19 cigarettes per day   | -0.23572 | 0.122707 |
| ihd | 249384 | 0 | 0 cigarettes per day | 20 to 30 cigarettes per day   | -0.03046 | 0.228803 |
| ihd | 249384 | 0 | 0 cigarettes per day | 0 to 9 cigarettes per day     | 0.09531  | 0.150742 |
| ihd | 249384 | 0 | 0 cigarettes per day | 10 to 19 cigarettes per day   | 0.81093  | 0.124717 |
| ihd | 249384 | 0 | 0 cigarettes per day | 0 to 9 cigarettes per day     | 0.875469 | 0.191327 |
| ihd | 249384 | 0 | 0 cigarettes per day | 20 to 30 cigarettes per day   | 0.916291 | 0.163265 |
| ihd | 298268 | 0 | 0 cigarettes per day | 1 to 19 cigarettes per day    | 0.832909 | 0.249556 |
| ihd | 298268 | 0 | 0 cigarettes per day | 20 to 29 cigarettes per day   | 1.05779  | 0.204613 |
| ihd | 298268 | 0 | 0 cigarettes per day | 31 to 46.5 cigarettes per day | 1.48614  | 0.211815 |
| ihd | 309699 | 0 | 0 cigarettes per day | 0 to 20 cigarettes per day    | 0.19062  | 0.267752 |
| ihd | 309699 | 1 | 0 cigarettes per day | 21 to 31.5 cigarettes per day | 0.231112 | 0.070862 |
| ihd | 309729 | 0 | 0 cigarettes per day | 10 to 15 cigarettes per day   | 1.808289 | 0.2091   |
| ihd | 309729 | 0 | 0 cigarettes per day | 5 to 9 cigarettes per day     | 2.451005 | 0.318878 |
| ihd | 309729 | 0 | 0 cigarettes per day | 5 to 9 cigarettes per day     | 1.774952 | 0.410758 |
| ihd | 309729 | 0 | 0 cigarettes per day | 5 to 9 cigarettes per day     | 1.360977 | 0.3663   |
| ihd | 309729 | 0 | 0 cigarettes per day | 10 to 15 cigarettes per day   | 0.741937 | 0.340136 |
| ihd | 309729 | 0 | 0 cigarettes per day | 10 to 15 cigarettes per day   | 1.740466 | 0.308808 |
| ihd | 328259 | 0 | 0 cigarettes per day | 1 to 7 cigarettes per day     | 0.215111 | 0.059661 |
| ihd | 328259 | 0 | 0 cigarettes per day | 1 to 7 cigarettes per day     | 0.385262 | 0.062474 |
| ihd | 328259 | 0 | 0 cigarettes per day | 8 to 15 cigarettes per day    | 0.41871  | 0.060419 |
| ihd | 328259 | 0 | 0 cigarettes per day | 8 to 15 cigarettes per day    | 0.425268 | 0.063359 |
| ihd | 328259 | 0 | 0 cigarettes per day | 8 to 15 cigarettes per day    | 0.524729 | 0.08604  |
| ihd | 328259 | 0 | 0 cigarettes per day | 16 to 25 cigarettes per day   | 0.530628 | 0.076531 |
| ihd | 328259 | 0 | 0 cigarettes per day | 27 to 40.5 cigarettes per day | 0.698135 | 0.159915 |
| ihd | 328259 | 0 | 0 cigarettes per day | 27 to 40.5 cigarettes per day | 0.722706 | 0.70958  |
| ihd | 328259 | 0 | 0 cigarettes per day | 16 to 25 cigarettes per day   | 0.806476 | 0.228909 |
| ihd | 328274 | 0 | 0 cigarettes per day | 20 to 30 cigarettes per day   | 0.693147 | 1.211735 |
| ihd | 328274 | 0 | 0 cigarettes per day | 1 to 19 cigarettes per day    | 0.530628 | 1.42557  |
| ihd | 328460 | 0 | 0 cigarettes per day | 20 to 30 cigarettes per day   | 1.10194  | 0.342396 |



|     |        |   |                      |                               |          |          |
|-----|--------|---|----------------------|-------------------------------|----------|----------|
| ihd | 328460 | 0 | 0 cigarettes per day | 10 to 19 cigarettes per day   | 0.751416 | 0.34174  |
| ihd | 328460 | 0 | 0 cigarettes per day | 0 to 9 cigarettes per day     | 0.41211  | 0.452764 |
| ihd | 328472 | 0 | 0 cigarettes per day | 0 to 19 cigarettes per day    | 0.587787 | 1.346372 |
| ihd | 328472 | 0 | 0 cigarettes per day | 20 to 30 cigarettes per day   | 0.741937 | 1.154033 |
| ihd | 330932 | 0 | 0 cigarettes per day | 22 to 33 cigarettes per day   | 1.893112 | 0.981605 |
| ihd | 330932 | 0 | 0 cigarettes per day | 1 to 9 cigarettes per day     | 0.039221 | 0.470958 |
| ihd | 330932 | 0 | 0 cigarettes per day | 1 to 9 cigarettes per day     | 0.09531  | 0.310761 |
| ihd | 330932 | 0 | 0 cigarettes per day | 10 to 20 cigarettes per day   | 0.322083 | 0.288376 |
| ihd | 330932 | 0 | 0 cigarettes per day | 22 to 33 cigarettes per day   | 0.385262 | 0.494586 |
| ihd | 330932 | 0 | 0 cigarettes per day | 10 to 20 cigarettes per day   | 0.891998 | 0.600117 |
| ihd | 331705 | 0 | 0 cigarettes per day | 21 to 31.5 cigarettes per day | 1.061257 | 0.062672 |
| ihd | 331705 | 0 | 0 cigarettes per day | 21 to 31.5 cigarettes per day | 1.111858 | 0.085593 |
| ihd | 331705 | 0 | 0 cigarettes per day | 1 to 9 cigarettes per day     | 0.683097 | 0.065708 |
| ihd | 331705 | 0 | 0 cigarettes per day | 10 to 19 cigarettes per day   | 0.841567 | 0.084667 |
| ihd | 332104 | 0 | 0 cigarettes per day | 20 to 20 cigarettes per day   | 0.751416 | 0.117925 |
| ihd | 332104 | 0 | 0 cigarettes per day | 22 to 33 cigarettes per day   | 0.832909 | 0.108696 |
| ihd | 332104 | 0 | 0 cigarettes per day | 1 to 19 cigarettes per day    | 0.615186 | 0.111693 |
| ihd | 334410 | 0 | 0 cigarettes per day | 1 to 25 cigarettes per day    | 0.779325 | 0.140554 |
| ihd | 334410 | 0 | 0 cigarettes per day | 26 to 39 cigarettes per day   | 0.947789 | 0.134149 |
| ihd | 335266 | 0 | 0 cigarettes per day | 1 to 9 cigarettes per day     | 0.122218 | 0.072241 |
| ihd | 335266 | 0 | 0 cigarettes per day | 22 to 33 cigarettes per day   | 0.678034 | 0.063452 |
| ihd | 335762 | 0 | 0 cigarettes per day | 1 to 19 cigarettes per day    | 0.518794 | 0.422133 |
| ihd | 335762 | 0 | 0 cigarettes per day | 1 to 19 cigarettes per day    | 0.850151 | 0.199503 |
| ihd | 335762 | 0 | 0 cigarettes per day | 21 to 31.5 cigarettes per day | 0.996949 | 0.189209 |
| ihd | 335762 | 0 | 0 cigarettes per day | 21 to 31.5 cigarettes per day | 1.350667 | 0.524083 |
| ihd | 336216 | 0 | 0 cigarettes per day | 40 to 60 cigarettes per day   | 1.286474 | 0.122618 |
| ihd | 336216 | 1 | 0 cigarettes per day | 10 to 19 cigarettes per day   | 1.111858 | 0.060419 |
| ihd | 336216 | 0 | 0 cigarettes per day | 40 to 60 cigarettes per day   | 1.05779  | 0.337479 |
| ihd | 336216 | 0 | 0 cigarettes per day | 20 to 39 cigarettes per day   | 1.229641 | 0.079067 |
| ihd | 336216 | 1 | 0 cigarettes per day | 0 to 9 cigarettes per day     | 0.904218 | 0.054738 |
| ihd | 336216 | 0 | 0 cigarettes per day | 10 to 19 cigarettes per day   | 0.896088 | 0.049979 |
| ihd | 336216 | 0 | 0 cigarettes per day | 20 to 39 cigarettes per day   | 1.004302 | 0.052329 |
| ihd | 336216 | 0 | 0 cigarettes per day | 0 to 9 cigarettes per day     | 0.688135 | 0.062814 |
| ihd | 336319 | 0 | 0 cigarettes per day | 15 to 24 cigarettes per day   | 0.524729 | 0.256694 |
| ihd | 336319 | 0 | 0 cigarettes per day | 1 to 14 cigarettes per day    | 0.24686  | 0.240047 |
| ihd | 336319 | 0 | 0 cigarettes per day | 25 to 37.5 cigarettes per day | 0.641854 | 0.307381 |
| ihd | 336319 | 0 | 0 cigarettes per day | 15 to 24 cigarettes per day   | 0.500775 | 0.24299  |
| ihd | 336319 | 0 | 0 cigarettes per day | 1 to 14 cigarettes per day    | 0.524729 | 0.153324 |
| ihd | 336319 | 0 | 0 cigarettes per day | 25 to 37.5 cigarettes per day | 0.604316 | 0.276253 |
| ihd | 336682 | 0 | 0 cigarettes per day | 1 to 14 cigarettes per day    | 0.65752  | 0.089881 |
| ihd | 336682 | 0 | 0 cigarettes per day | 15 to 24 cigarettes per day   | 0.693147 | 0.089286 |
| ihd | 336682 | 0 | 0 cigarettes per day | 26 to 39 cigarettes per day   | 0.806476 | 0.115024 |
| ihd | 336682 | 0 | 0 cigarettes per day | 1 to 14 cigarettes per day    | 0.81978  | 0.103389 |

|     |        |   |                      |                               |          |          |
|-----|--------|---|----------------------|-------------------------------|----------|----------|
| ihd | 336682 | 0 | 0 cigarettes per day | 15 to 24 cigarettes per day   | 1.291984 | 0.107928 |
| ihd | 336682 | 0 | 0 cigarettes per day | 26 to 39 cigarettes per day   | 1.644805 | 0.201422 |
| ihd | 336801 | 0 | 0 cigarettes per day | 20 to 20 cigarettes per day   | 0.524729 | 0.081512 |
| ihd | 336801 | 0 | 0 cigarettes per day | 21 to 31.5 cigarettes per day | 0.65752  | 0.058158 |
| ihd | 336801 | 0 | 0 cigarettes per day | 0 to 19 cigarettes per day    | 0.385262 | 0.069416 |
| ihd | 336801 | 0 | 0 cigarettes per day | 0 to 19 cigarettes per day    | 0.29267  | 0.097091 |
| ihd | 336801 | 0 | 0 cigarettes per day | 20 to 20 cigarettes per day   | 0.223144 | 0.132449 |
| ihd | 336801 | 0 | 0 cigarettes per day | 21 to 31.5 cigarettes per day | 0.336472 | 0.210459 |
| ihd | 343310 | 0 | 0 cigarettes per day | 15 to 24 cigarettes per day   | 1.147402 | 0.155491 |
| ihd | 343310 | 0 | 0 cigarettes per day | 1 to 2 cigarettes per day     | -0.27444 | 0.986842 |
| ihd | 343310 | 0 | 0 cigarettes per day | 3 to 5 cigarettes per day     | 0.029559 | 0.366554 |
| ihd | 343310 | 0 | 0 cigarettes per day | 1 to 2 cigarettes per day     | 0.336472 | 0.976676 |
| ihd | 343310 | 0 | 0 cigarettes per day | 15 to 24 cigarettes per day   | 0.476234 | 0.148942 |
| ihd | 343310 | 0 | 0 cigarettes per day | 10 to 14 cigarettes per day   | 0.518794 | 0.162476 |
| ihd | 343310 | 0 | 0 cigarettes per day | 26 to 39 cigarettes per day   | 0.672944 | 0.1692   |
| ihd | 343310 | 0 | 0 cigarettes per day | 6 to 9 cigarettes per day     | 0.741937 | 0.21137  |
| ihd | 343310 | 0 | 0 cigarettes per day | 3 to 5 cigarettes per day     | 0.760806 | 0.360004 |
| ihd | 343310 | 0 | 0 cigarettes per day | 6 to 9 cigarettes per day     | 0.891998 | 0.251966 |
| ihd | 343310 | 0 | 0 cigarettes per day | 10 to 14 cigarettes per day   | 1.12493  | 0.159025 |
| ihd | 343310 | 0 | 0 cigarettes per day | 26 to 39 cigarettes per day   | 1.238374 | 0.33496  |
| ihd | 343312 | 0 | 0 cigarettes per day | 21 to 31.5 cigarettes per day | 1.415853 | 0.492867 |
| ihd | 343312 | 0 | 0 cigarettes per day | 1 to 9 cigarettes per day     | 0.636577 | 0.36983  |
| ihd | 343312 | 0 | 0 cigarettes per day | 10 to 19 cigarettes per day   | 1.22083  | 0.377009 |
| ihd | 343400 | 0 | 0 cigarettes per day | 1 to 4 cigarettes per day     | 0.662688 | 0.234162 |
| ihd | 343400 | 0 | 0 cigarettes per day | 5 to 14 cigarettes per day    | 0.928219 | 0.129792 |
| ihd | 343400 | 1 | 0 cigarettes per day | 15 to 24 cigarettes per day   | 1.439835 | 0.086652 |
| ihd | 343400 | 1 | 0 cigarettes per day | 25 to 34 cigarettes per day   | 1.60342  | 0.103016 |
| ihd | 343400 | 0 | 0 cigarettes per day | 35 to 44 cigarettes per day   | 1.717395 | 0.124753 |
| ihd | 343400 | 0 | 0 cigarettes per day | 45 to 67.5 cigarettes per day | 1.747459 | 0.273332 |
| ihd | 343461 | 0 | 0 cigarettes per day | 20 to 30 cigarettes per day   | 0.667829 | 0.060178 |
| ihd | 343461 | 0 | 0 cigarettes per day | 1 to 9 cigarettes per day     | 0.524729 | 0.08755  |
| ihd | 343461 | 0 | 0 cigarettes per day | 10 to 19 cigarettes per day   | 0.81093  | 0.0839   |
| ihd | 343461 | 0 | 0 cigarettes per day | 10 to 19 cigarettes per day   | 0.48858  | 0.061037 |
| ihd | 343461 | 0 | 0 cigarettes per day | 1 to 9 cigarettes per day     | 0.518794 | 0.080479 |
| ihd | 343461 | 0 | 0 cigarettes per day | 20 to 30 cigarettes per day   | 1.327075 | 0.133303 |
| ihd | 355955 | 0 | 0 cigarettes per day | 26 to 39 cigarettes per day   | 1.007958 | 0.884478 |
| ihd | 355955 | 0 | 0 cigarettes per day | 26 to 39 cigarettes per day   | 1.015231 | 0.878069 |
| ihd | 355955 | 0 | 0 cigarettes per day | 26 to 39 cigarettes per day   | 0.904218 | 0.981162 |
| ihd | 355955 | 0 | 0 cigarettes per day | 26 to 39 cigarettes per day   | 0.371564 | 1.671358 |
| ihd | 355955 | 0 | 0 cigarettes per day | 25 to 37.5 cigarettes per day | 0.751416 | 1.143146 |
| ihd | 355955 | 0 | 0 cigarettes per day | 15 to 24 cigarettes per day   | 0.788457 | 1.101577 |
| ihd | 355955 | 0 | 0 cigarettes per day | 1 to 14 cigarettes per day    | -0.04082 | 2.524447 |
| ihd | 356107 | 1 | 0 cigarettes per day | 15 to 24 cigarettes per day   | 0.262364 | 0.027473 |

|     |        |   |                      |                               |          |          |
|-----|--------|---|----------------------|-------------------------------|----------|----------|
| ihd | 356109 | 0 | 0 cigarettes per day | 25 to 37.5 cigarettes per day | 0.165514 | 2.053788 |
| ihd | 356109 | 0 | 0 cigarettes per day | 1 to 14 cigarettes per day    | 0.506818 | 1.459921 |
| ihd | 356109 | 0 | 0 cigarettes per day | 15 to 24 cigarettes per day   | 0.518794 | 1.442541 |
| ihd | 356109 | 0 | 0 cigarettes per day | 25 to 37.5 cigarettes per day | 0.518794 | 1.442541 |
| ihd | 356109 | 0 | 0 cigarettes per day | 1 to 14 cigarettes per day    | 0.548121 | 1.400849 |
| ihd | 356109 | 0 | 0 cigarettes per day | 15 to 24 cigarettes per day   | 0.722706 | 1.176441 |
| ihd | 356114 | 0 | 0 cigarettes per day | 16 to 24 cigarettes per day   | 0.647103 | 0.129554 |
| ihd | 356114 | 0 | 0 cigarettes per day | 16 to 24 cigarettes per day   | 0.609766 | 0.09289  |
| ihd | 356114 | 0 | 0 cigarettes per day | 5 to 14 cigarettes per day    | 0.500775 | 0.145331 |
| ihd | 356114 | 0 | 0 cigarettes per day | 5 to 14 cigarettes per day    | 0.451076 | 0.092617 |
| ihd | 356114 | 0 | 0 cigarettes per day | 1 to 4 cigarettes per day     | 0.41211  | 0.31761  |
| ihd | 356114 | 0 | 0 cigarettes per day | 1 to 4 cigarettes per day     | -0.06188 | 0.236105 |
| ihd | 356141 | 0 | 0 cigarettes per day | 1 to 9 cigarettes per day     | 0.24686  | 0.079719 |
| ihd | 356141 | 0 | 0 cigarettes per day | 10 to 19 cigarettes per day   | 0.438255 | 0.065833 |
| ihd | 356141 | 1 | 0 cigarettes per day | 41 to 61.5 cigarettes per day | 0.609766 | 0.069321 |
| ihd | 356141 | 0 | 0 cigarettes per day | 20 to 29 cigarettes per day   | 0.615186 | 0.055157 |
| ihd | 356141 | 0 | 0 cigarettes per day | 30 to 39 cigarettes per day   | 0.667829 | 0.078493 |
| ihd | 356143 | 0 | 0 cigarettes per day | 30 to 39 cigarettes per day   | 0.887891 | 0.045142 |
| ihd | 356143 | 0 | 0 cigarettes per day | 20 to 29 cigarettes per day   | 0.824175 | 0.021259 |
| ihd | 356143 | 0 | 0 cigarettes per day | 10 to 19 cigarettes per day   | 0.760806 | 0.019073 |
| ihd | 356143 | 1 | 0 cigarettes per day | 41 to 61.5 cigarettes per day | 0.587787 | 0.063776 |
| ihd | 356143 | 0 | 0 cigarettes per day | 41 to 61.5 cigarettes per day | 1.054312 | 0.074664 |
| ihd | 356143 | 0 | 0 cigarettes per day | 20 to 29 cigarettes per day   | 0.438255 | 0.064187 |
| ihd | 356143 | 0 | 0 cigarettes per day | 10 to 19 cigarettes per day   | 0.425268 | 0.095038 |
| ihd | 356143 | 0 | 0 cigarettes per day | 1 to 9 cigarettes per day     | 0.215111 | 0.065833 |
| ihd | 356143 | 0 | 0 cigarettes per day | 1 to 9 cigarettes per day     | 0.512824 | 0.041244 |
| ihd | 357254 | 0 | 0 cigarettes per day | 1 to 9 cigarettes per day     | 0.285179 | 0.038361 |
| ihd | 357254 | 0 | 0 cigarettes per day | 1 to 9 cigarettes per day     | 0.29267  | 0.026652 |
| ihd | 357254 | 1 | 0 cigarettes per day | 10 to 19 cigarettes per day   | 0.300105 | 0.047241 |
| ihd | 357254 | 1 | 0 cigarettes per day | 21 to 31.5 cigarettes per day | 0.41211  | 0.047304 |
| ihd | 357254 | 0 | 0 cigarettes per day | 21 to 31.5 cigarettes per day | 0.553885 | 0.058644 |
| ihd | 357264 | 0 | 0 cigarettes per day | 1 to 25 cigarettes per day    | 0.506818 | 0.239988 |
| ihd | 357264 | 0 | 0 cigarettes per day | 25 to 37.5 cigarettes per day | 0.81978  | 0.407114 |
| ihd | 357264 | 0 | 0 cigarettes per day | 1 to 25 cigarettes per day    | 0.385262 | 0.237559 |
| ihd | 357264 | 0 | 0 cigarettes per day | 25 to 37.5 cigarettes per day | 0.854415 | 0.392133 |
| ihd | 357274 | 1 | 0 cigarettes per day | 40 to 60 cigarettes per day   | 4.312677 | 0.464577 |
| ihd | 357274 | 1 | 0 cigarettes per day | 11 to 19 cigarettes per day   | 2.071913 | 0.216226 |
| ihd | 357274 | 1 | 0 cigarettes per day | 20 to 39 cigarettes per day   | 2.641198 | 0.170007 |
| ihd | 357274 | 0 | 0 cigarettes per day | 1 to 5 cigarettes per day     | 0.912283 | 0.449758 |
| ihd | 357274 | 0 | 0 cigarettes per day | 6 to 10 cigarettes per day    | 1.403643 | 0.249461 |
| ihd | 357353 | 0 | 0 cigarettes per day | 1 to 14 cigarettes per day    | 0.824175 | 0.253983 |
| ihd | 357353 | 0 | 0 cigarettes per day | 15 to 24 cigarettes per day   | 1.780024 | 0.262845 |
| ihd | 357353 | 0 | 0 cigarettes per day | 25 to 37.5 cigarettes per day | 2.398804 | 0.429341 |

|     |        |   |                      |                               |          |          |
|-----|--------|---|----------------------|-------------------------------|----------|----------|
| ihd | 357373 | 0 | 0 cigarettes per day | 1 to 10 cigarettes per day    | 0.636577 | 0.434618 |
| ihd | 357373 | 0 | 0 cigarettes per day | 11 to 16.5 cigarettes per day | 1.862529 | 0.356113 |
| ihd | 357410 | 0 | 0 cigarettes per day | 20 to 30 cigarettes per day   | 1.756132 | 0.166984 |
| ihd | 357410 | 0 | 0 cigarettes per day | 0 to 19 cigarettes per day    | 0.609766 | 0.15528  |
| ihd | 357413 | 0 | 0 cigarettes per day | 0 to 19 cigarettes per day    | -0.35667 | 0.619534 |
| ihd | 357413 | 0 | 0 cigarettes per day | 0 to 19 cigarettes per day    | 0        | 0.382653 |
| ihd | 357413 | 0 | 0 cigarettes per day | 20 to 30 cigarettes per day   | 1.029619 | 0.419096 |
| ihd | 357413 | 0 | 0 cigarettes per day | 20 to 30 cigarettes per day   | 1.458615 | 0.355956 |
| ihd | 357427 | 0 | 0 cigarettes per day | 26 to 39 cigarettes per day   | 2.122262 | 0.355615 |
| ihd | 357427 | 0 | 0 cigarettes per day | 1 to 15 cigarettes per day    | 0.71295  | 0.34889  |
| ihd | 357427 | 0 | 0 cigarettes per day | 16 to 25 cigarettes per day   | 1.23256  | 0.316089 |
| ihd | 357429 | 0 | 0 cigarettes per day | 16 to 24 cigarettes per day   | 1.366092 | 0.184168 |
| ihd | 357429 | 0 | 0 cigarettes per day | 16 to 24 cigarettes per day   | 2.209373 | 0.34639  |
| ihd | 357429 | 0 | 0 cigarettes per day | 1 to 15 cigarettes per day    | 0.350657 | 0.251509 |
| ihd | 357429 | 0 | 0 cigarettes per day | 1 to 15 cigarettes per day    | 0.845868 | 0.420426 |
| ihd | 357441 | 0 | 0 cigarettes per day | 0 to 9 cigarettes per day     | 0.470004 | 0.355548 |
| ihd | 357441 | 0 | 0 cigarettes per day | 10 to 15 cigarettes per day   | 1.902108 | 0.353716 |
| ihd | 357453 | 0 | 0 cigarettes per day | 0 to 4 cigarettes per day     | 0.41871  | 0.209788 |
| ihd | 357453 | 1 | 0 cigarettes per day | 5 to 7.5 cigarettes per day   | 1.128171 | 0.099894 |
| ihd | 357456 | 0 | 0 cigarettes per day | 1 to 10 cigarettes per day    | 0.693147 | 0.318878 |
| ihd | 357456 | 0 | 0 cigarettes per day | 11 to 20 cigarettes per day   | 0.993252 | 0.302343 |
| ihd | 357456 | 0 | 0 cigarettes per day | 21 to 31.5 cigarettes per day | 1.064711 | 0.580577 |
| ihd | 357927 | 0 | 0 cigarettes per day | 0 to 9 cigarettes per day     | 1.163151 | 0.310906 |
| ihd | 357927 | 0 | 0 cigarettes per day | 11 to 16.5 cigarettes per day | 2.208274 | 0.364431 |
| ihd | 357948 | 0 | 0 cigarettes per day | 35 to 52.5 cigarettes per day | 2.302585 | 0.242347 |
| ihd | 357948 | 0 | 0 cigarettes per day | 25 to 34 cigarettes per day   | 2.116256 | 0.276617 |
| ihd | 357948 | 0 | 0 cigarettes per day | 1 to 14 cigarettes per day    | -0.10536 | 0.510204 |
| ihd | 357948 | 0 | 0 cigarettes per day | 15 to 24 cigarettes per day   | 1.458615 | 1.281443 |
| ihd | 357952 | 0 | 0 cigarettes per day | 1 to 14 cigarettes per day    | 0.470004 | 0.223214 |
| ihd | 357952 | 0 | 0 cigarettes per day | 15 to 22.5 cigarettes per day | 0.832909 | 0.255102 |
| ihd | 357956 | 1 | 0 cigarettes per day | 1 to 24 cigarettes per day    | 1.547563 | 0.134529 |
| ihd | 357956 | 1 | 0 cigarettes per day | 25 to 37.5 cigarettes per day | 2.484907 | 0.158374 |
| ihd | 357959 | 0 | 0 cigarettes per day | 1 to 14 cigarettes per day    | 1.187843 | 0.250212 |
| ihd | 357959 | 0 | 0 cigarettes per day | 15 to 24 cigarettes per day   | 1.711995 | 0.383802 |
| ihd | 357959 | 0 | 0 cigarettes per day | 1 to 14 cigarettes per day    | 0.378436 | 0.139787 |
| ihd | 357959 | 0 | 0 cigarettes per day | 15 to 24 cigarettes per day   | 0.966984 | 0.148792 |
| ihd | 357959 | 0 | 0 cigarettes per day | 25 to 37.5 cigarettes per day | 1.927164 | 0.210958 |
| ihd | 358054 | 0 | 0 cigarettes per day | 0 to 20 cigarettes per day    | 0.875469 | 0.487883 |
| ihd | 358054 | 0 | 0 cigarettes per day | 21 to 31.5 cigarettes per day | 2.352327 | 0.654139 |
| ihd | 358066 | 0 | 0 cigarettes per day | 15 to 24 cigarettes per day   | 1.722767 | 0.22777  |
| ihd | 358066 | 0 | 0 cigarettes per day | 25 to 37.5 cigarettes per day | 1.686399 | 0.212585 |
| ihd | 358066 | 0 | 0 cigarettes per day | 25 to 37.5 cigarettes per day | 2.282382 | 0.351416 |
| ihd | 358066 | 0 | 0 cigarettes per day | 0 to 14 cigarettes per day    | 0.875469 | 0.223214 |

|               |        |   |                      |                               |          |          |
|---------------|--------|---|----------------------|-------------------------------|----------|----------|
| ihd           | 358066 | 0 | 0 cigarettes per day | 0 to 14 cigarettes per day    | 0.741937 | 0.218659 |
| ihd           | 358066 | 0 | 0 cigarettes per day | 15 to 24 cigarettes per day   | 1.163151 | 0.191327 |
| ihd           | 359113 | 0 | 0 cigarettes per day | 0 to 24 cigarettes per day    | 0.693147 | 1.211735 |
| ihd           | 359114 | 0 | 0 cigarettes per day | 25 to 34 cigarettes per day   | 0.832909 | 1.053682 |
| ihd           | 359114 | 0 | 0 cigarettes per day | 1 to 14 cigarettes per day    | 0.993252 | 0.897581 |
| ihd           | 359114 | 0 | 0 cigarettes per day | 15 to 24 cigarettes per day   | 1.064711 | 0.835679 |
| ihd           | 359114 | 0 | 0 cigarettes per day | 35 to 52.5 cigarettes per day | 1.648659 | 0.466052 |
| ihd           | 359115 | 0 | 0 cigarettes per day | 1 to 4 cigarettes per day     | 0.875469 | 0.42517  |
| ihd           | 359115 | 0 | 0 cigarettes per day | 5 to 14 cigarettes per day    | 0.916291 | 0.193878 |
| ihd           | 359115 | 0 | 0 cigarettes per day | 15 to 24 cigarettes per day   | 1.098612 | 0.127551 |
| ihd           | 359115 | 0 | 0 cigarettes per day | 35 to 44 cigarettes per day   | 1.589235 | 0.171803 |
| ihd           | 359115 | 0 | 0 cigarettes per day | 25 to 34 cigarettes per day   | 1.629241 | 0.17507  |
| ihd           | 359115 | 0 | 0 cigarettes per day | 45 to 67.5 cigarettes per day | 3.091042 | 0.31308  |
| ihd           | 359320 | 0 | 0 cigarettes per day | 35 to 40 cigarettes per day   | 1.481605 | 0.249304 |
| ihd           | 359320 | 0 | 0 cigarettes per day | 45 to 67.5 cigarettes per day | 1.609438 | 0.265306 |
| ihd           | 359320 | 0 | 0 cigarettes per day | 0 to 24 cigarettes per day    | 0.916291 | 0.234694 |
| ihd           | 359320 | 0 | 0 cigarettes per day | 25 to 35 cigarettes per day   | 1.064711 | 0.255102 |
| ihd           | 432350 | 0 | 0 cigarettes per day | 1 to 14 cigarettes per day    | 0.24686  | 0.045783 |
| ihd           | 432350 | 1 | 0 cigarettes per day | 15 to 24 cigarettes per day   | 0.392042 | 0.049977 |
| ihd           | 432350 | 1 | 0 cigarettes per day | 25 to 37.5 cigarettes per day | 0.392042 | 0.07239  |
| ihd           | 462792 | 0 | 0 cigarettes per day | 25 to 37.5 cigarettes per day | 1.205971 | 0.08132  |
| ihd           | 462792 | 0 | 0 cigarettes per day | 1 to 14 cigarettes per day    | 0.631272 | 0.089044 |
| ihd           | 462792 | 0 | 0 cigarettes per day | 15 to 24 cigarettes per day   | 0.936093 | 0.073677 |
| ihd           | 462792 | 0 | 0 cigarettes per day | 15 to 24 cigarettes per day   | 0.524729 | 0.055909 |
| ihd           | 462792 | 0 | 0 cigarettes per day | 1 to 14 cigarettes per day    | 0.239017 | 0.066399 |
| ihd           | 462792 | 0 | 0 cigarettes per day | 25 to 37.5 cigarettes per day | 0.667829 | 0.062467 |
| ihd           | 501896 | 0 | 0 cigarettes per day | 1 to 19 cigarettes per day    | 0.500775 | 0.085047 |
| ihd           | 501896 | 0 | 0 cigarettes per day | 20 to 30 cigarettes per day   | 0.604316 | 0.07097  |
| ihd           | 502077 | 0 | 0 cigarettes per day | 1 to 9 cigarettes per day     | 0.207014 | 0.068018 |
| ihd           | 502077 | 1 | 0 cigarettes per day | 10 to 19 cigarettes per day   | 0.24686  | 0.060543 |
| ihd           | 502077 | 0 | 0 cigarettes per day | 20 to 30 cigarettes per day   | 0.708036 | 0.06427  |
| ihd           | 502134 | 0 | 0 cigarettes per day | 4 to 14 cigarettes per day    | 0.751416 | 0.077903 |
| ihd           | 502134 | 0 | 0 cigarettes per day | 1 to 4 cigarettes per day     | 0.457425 | 0.223542 |
| ihd           | 502134 | 0 | 0 cigarettes per day | 15 to 22.5 cigarettes per day | 0.871293 | 0.088181 |
| kidney_cancer | 164492 | 0 | 0 pack-years         | 1 to 19 pack-years            | -0.10536 | 0.226757 |
| kidney_cancer | 164492 | 0 | 0 pack-years         | 1 to 19 pack-years            | 0.182322 | 0.276361 |
| kidney_cancer | 164492 | 0 | 0 pack-years         | 40 to 60 pack-years           | 0.262364 | 0.274725 |
| kidney_cancer | 164492 | 0 | 0 pack-years         | 20 to 39 pack-years           | 0.336472 | 0.309767 |
| kidney_cancer | 164492 | 0 | 0 pack-years         | 20 to 39 pack-years           | 0.336472 | 0.23688  |
| kidney_cancer | 164492 | 0 | 0 pack-years         | 40 to 60 pack-years           | 0.693147 | 0.293367 |
| kidney_cancer | 164580 | 1 | 0 pack-years         | 0 to 20 pack-years            | 0.850151 | 0.250657 |
| kidney_cancer | 164580 | 0 | 0 pack-years         | 20 to 30 pack-years           | 0.815365 | 0.240532 |
| kidney_cancer | 164580 | 0 | 0 pack-years         | 0 to 20 pack-years            | 0.48858  | 0.312869 |

|               |        |   |              |                           |          |          |
|---------------|--------|---|--------------|---------------------------|----------|----------|
| kidney_cancer | 164580 | 0 | 0 pack-years | 20 to 30 pack-years       | 0.615186 | 0.367439 |
| kidney_cancer | 328339 | 0 | 0 pack-years | 60 to 90 pack-years       | 1.305626 | 0.766689 |
| kidney_cancer | 328339 | 0 | 0 pack-years | 0 to 19 pack-years        | 1.075002 | 1.961587 |
| kidney_cancer | 328339 | 0 | 0 pack-years | 40 to 59 pack-years       | 0.609766 | 0.651619 |
| kidney_cancer | 328339 | 0 | 0 pack-years | 0 to 19 pack-years        | -0.38566 | 2.108343 |
| kidney_cancer | 328339 | 0 | 0 pack-years | 20 to 39 pack-years       | 0.741937 | 0.596453 |
| kidney_cancer | 343155 | 0 | 0 pack-years | 21 to 40 pack-years       | 0.09531  | 0.440631 |
| kidney_cancer | 343155 | 0 | 0 pack-years | 0 to 20 pack-years        | 0.262364 | 0.529827 |
| kidney_cancer | 343155 | 0 | 0 pack-years | 21 to 40 pack-years       | 0.336472 | 0.400875 |
| kidney_cancer | 343155 | 0 | 0 pack-years | 41 to 61.5 pack-years     | 0.587787 | 0.340136 |
| kidney_cancer | 343155 | 0 | 0 pack-years | 41 to 61.5 pack-years     | 0.832909 | 0.28394  |
| kidney_cancer | 343155 | 0 | 0 pack-years | 0 to 20 pack-years        | 1.131402 | 0.534891 |
| kidney_cancer | 343580 | 0 | 0 pack-years | 75.05 to 112.5 pack-years | -0.10536 | 0.326769 |
| kidney_cancer | 343580 | 0 | 0 pack-years | 50.05 to 75 pack-years    | 0        | 0.280258 |
| kidney_cancer | 343580 | 0 | 0 pack-years | 25.05 to 50 pack-years    | 0        | 0.250212 |
| kidney_cancer | 343580 | 0 | 0 pack-years | 0.05 to 25 pack-years     | 0.182322 | 0.280258 |
| kidney_cancer | 358807 | 0 | 0 pack-years | 0 to 15.9 pack-years      | 2.408745 | 1.552865 |
| kidney_cancer | 358807 | 1 | 0 pack-years | 34.3 to 51.45 pack-years  | 1.962908 | 0.489065 |
| kidney_cancer | 358807 | 1 | 0 pack-years | 16 to 34.2 pack-years     | 1.754404 | 0.69469  |
| kidney_cancer | 358807 | 1 | 0 pack-years | 34.3 to 51.45 pack-years  | 1.691939 | 0.363626 |
| kidney_cancer | 358807 | 0 | 0 pack-years | 34.3 to 51.45 pack-years  | 1.451614 | 0.510802 |
| kidney_cancer | 358807 | 0 | 0 pack-years | 0 to 15.9 pack-years      | 1.313724 | 0.757077 |
| kidney_cancer | 358807 | 1 | 0 pack-years | 16 to 34.2 pack-years     | 1.244155 | 0.396254 |
| kidney_cancer | 358807 | 0 | 0 pack-years | 34.3 to 51.45 pack-years  | 1.205971 | 0.355157 |
| kidney_cancer | 358807 | 0 | 0 pack-years | 34.3 to 51.45 pack-years  | 1.121678 | 0.302466 |
| kidney_cancer | 358807 | 0 | 0 pack-years | 16 to 34.2 pack-years     | 1.054312 | 0.477316 |
| kidney_cancer | 358807 | 0 | 0 pack-years | 0 to 15.9 pack-years      | 0.932164 | 1.019404 |
| kidney_cancer | 358807 | 0 | 0 pack-years | 16 to 34.2 pack-years     | 0.904218 | 0.415186 |
| kidney_cancer | 358807 | 1 | 0 pack-years | 0 to 15.9 pack-years      | 0.698135 | 0.171337 |
| kidney_cancer | 358807 | 0 | 0 pack-years | 0 to 15.9 pack-years      | 0.662688 | 0.429992 |
| kidney_cancer | 358807 | 0 | 0 pack-years | 0 to 15.9 pack-years      | 0.518794 | 1.228438 |
| kidney_cancer | 358807 | 0 | 0 pack-years | 16 to 34.2 pack-years     | 0.476234 | 0.264609 |
| kidney_cancer | 358807 | 0 | 0 pack-years | 16 to 34.2 pack-years     | 0.239017 | 0.343484 |
| kidney_cancer | 358807 | 1 | 0 pack-years | 34.3 to 51.45 pack-years  | 1.085189 | 0.239589 |
| kidney_cancer | 358809 | 0 | 0 pack-years | 40 to 60 pack-years       | 0.765468 | 0.434267 |
| kidney_cancer | 358809 | 0 | 0 pack-years | 0 to 19 pack-years        | 0.336472 | 0.428207 |
| kidney_cancer | 358809 | 0 | 0 pack-years | 20 to 30 pack-years       | 0.792993 | 0.702973 |
| kidney_cancer | 358809 | 0 | 0 pack-years | 0 to 9 pack-years         | -0.73397 | 0.935374 |
| kidney_cancer | 358809 | 0 | 0 pack-years | 10 to 19 pack-years       | -1.17118 | 0.929888 |
| kidney_cancer | 358809 | 0 | 0 pack-years | 20 to 39 pack-years       | 0.067659 | 0.371924 |
| kidney_cancer | 358812 | 0 | 0 pack-years | 10 to 19 pack-years       | -0.35667 | 0.255102 |
| kidney_cancer | 358812 | 0 | 0 pack-years | 30 to 39 pack-years       | -0.10536 | 0.42517  |
| kidney_cancer | 358814 | 0 | 0 pack-years | 1 to 20 pack-years        | -0.22314 | 0.57398  |

|               |        |   |              |                          |          |          |
|---------------|--------|---|--------------|--------------------------|----------|----------|
| kidney_cancer | 358814 | 0 | 0 pack-years | 21 to 31.5 pack-years    | 0.875469 | 0.457058 |
| kidney_cancer | 358814 | 0 | 0 pack-years | 1 to 20 pack-years       | 0.955511 | 0.441523 |
| kidney_cancer | 358814 | 1 | 0 pack-years | 21 to 31.5 pack-years    | 1.526056 | 0.421473 |
| kidney_cancer | 413175 | 0 | 0 pack-years | 31 to 40 pack-years      | 0.182322 | 0.162242 |
| kidney_cancer | 413175 | 0 | 0 pack-years | 21 to 30 pack-years      | 0.182322 | 0.146777 |
| kidney_cancer | 413175 | 0 | 0 pack-years | 40 to 60 pack-years      | 0.336472 | 0.163738 |
| kidney_cancer | 413175 | 0 | 0 pack-years | 1 to 10 pack-years       | 0.09531  | 0.142759 |
| kidney_cancer | 413175 | 0 | 0 pack-years | 11 to 20 pack-years      | 0.182322 | 0.734171 |
| kidney_cancer | 502130 | 0 | 0 pack-years | 0 to 10 pack-years       | 0.34359  | 0.422625 |
| kidney_cancer | 502130 | 0 | 0 pack-years | 10 to 19 pack-years      | -0.94161 | 0.595759 |
| kidney_cancer | 502130 | 0 | 0 pack-years | 20 to 29 pack-years      | 0.019803 | 0.384296 |
| kidney_cancer | 502130 | 0 | 0 pack-years | 30 to 45 pack-years      | 0.34359  | 0.295914 |
| kidney_cancer | 502132 | 0 | 0 pack-years | 1 to 19 pack-years       | 0.131028 | 0.244305 |
| kidney_cancer | 502132 | 0 | 0 pack-years | 20 to 39 pack-years      | 0.00995  | 0.201818 |
| kidney_cancer | 502132 | 0 | 0 pack-years | 40 to 60 pack-years      | 0.34359  | 0.212596 |
| kidney_cancer | 502217 | 0 | 0 pack-years | 1 to 10 pack-years       | -0.16252 | 0.536769 |
| kidney_cancer | 502217 | 0 | 0 pack-years | 10 to 19 pack-years      | 0.41211  | 0.357025 |
| kidney_cancer | 502217 | 0 | 0 pack-years | 20 to 29 pack-years      | 0.322083 | 0.381503 |
| kidney_cancer | 502217 | 0 | 0 pack-years | 30 to 45 pack-years      | 0.09531  | 0.443802 |
| kidney_cancer | 502427 | 0 | 0 pack-years | 20 to 30 pack-years      | 0.329304 | 0.18203  |
| kidney_cancer | 502427 | 0 | 0 pack-years | 10 to 19.9 pack-years    | 0.039221 | 0.273191 |
| kidney_cancer | 502427 | 0 | 0 pack-years | 1 to 4.9 pack-years      | -0.44629 | 0.261697 |
| kidney_cancer | 502427 | 0 | 0 pack-years | 5 to 9.9 pack-years      | -0.4943  | 0.357863 |
| kidney_cancer | 502441 | 0 | 0 pack-years | 1 to 19 pack-years       | -0.35667 | 0.392971 |
| kidney_cancer | 502441 | 0 | 0 pack-years | 20 to 39 pack-years      | 0.182322 | 0.33145  |
| kidney_cancer | 502441 | 0 | 0 pack-years | 40 to 69 pack-years      | 0.182322 | 0.353647 |
| kidney_cancer | 502441 | 0 | 0 pack-years | 70 to 105 pack-years     | 0.641854 | 0.457081 |
| kidney_cancer | 502441 | 0 | 0 pack-years | 1 to 19 pack-years       | 0        | 0.280258 |
| kidney_cancer | 502441 | 0 | 0 pack-years | 20 to 39 pack-years      | 0.336472 | 0.344369 |
| kidney_cancer | 502441 | 0 | 0 pack-years | 40 to 60 pack-years      | 0.405465 | 0.57161  |
| kidney_cancer | 502448 | 0 | 0 pack-years | 1 to 17 pack-years       | -0.27444 | 0.19344  |
| kidney_cancer | 502448 | 1 | 0 pack-years | 31 to 45.5 pack-years    | -0.16252 | 0.127983 |
| kidney_cancer | 502448 | 0 | 0 pack-years | 17 to 31 pack-years      | -0.05129 | 0.12544  |
| kidney_cancer | 502448 | 0 | 0 pack-years | 1 to 17 pack-years       | -0.16252 | 0.117027 |
| kidney_cancer | 502448 | 0 | 0 pack-years | 31 to 45.5 pack-years    | -0.16252 | 0.380843 |
| kidney_cancer | 502448 | 1 | 0 pack-years | 31 to 45.5 pack-years    | -0.11653 | 0.146538 |
| kidney_cancer | 502448 | 0 | 0 pack-years | 17 to 31 pack-years      | 0        | 0.148049 |
| kidney_cancer | 502448 | 0 | 0 pack-years | 1 to 17 pack-years       | -0.06188 | 0.149946 |
| kidney_cancer | 502448 | 0 | 0 pack-years | 17 to 31 pack-years      | -0.01005 | 0.262349 |
| kidney_cancer | 502478 | 0 | 0 pack-years | 28 to 42.2 pack-years    | 0.336472 | 0.139424 |
| kidney_cancer | 502478 | 0 | 0 pack-years | 1 to 15.9 pack-years     | 0.09531  | 0.160359 |
| kidney_cancer | 502478 | 0 | 0 pack-years | 16 to 27.9 pack-years    | 0.09531  | 0.160359 |
| kidney_cancer | 502478 | 0 | 0 pack-years | 42.3 to 63.45 pack-years | 0.693147 | 0.133482 |

|                  |        |   |                      |                               |          |          |
|------------------|--------|---|----------------------|-------------------------------|----------|----------|
| kidney_cancer    | 502480 | 0 | 0 pack-years         | 11 to 20 pack-years           | 0.955511 | 0.608792 |
| kidney_cancer    | 502480 | 0 | 0 pack-years         | 1 to 10 pack-years            | 1.029619 | 0.584544 |
| kidney_cancer    | 502480 | 0 | 0 pack-years         | 20 to 30 pack-years           | 0.641854 | 0.440618 |
| laryngeal_cancer | 298142 | 0 | 0 pack-years         | 1 to 10 pack-years            | 0.641854 | 0.228249 |
| laryngeal_cancer | 298142 | 0 | 0 pack-years         | 11 to 20 pack-years           | 1.481605 | 0.220315 |
| laryngeal_cancer | 298142 | 0 | 0 pack-years         | 21 to 31.5 pack-years         | 1.791759 | 0.242347 |
| laryngeal_cancer | 298147 | 0 | 0 pack-years         | 0 to 9 pack-years             | 0.336472 | 0.747085 |
| laryngeal_cancer | 298147 | 0 | 0 pack-years         | 10 to 19 pack-years           | 1.064711 | 0.59817  |
| laryngeal_cancer | 298147 | 1 | 0 pack-years         | 20 to 29 pack-years           | 1.131402 | 0.617182 |
| laryngeal_cancer | 298147 | 0 | 0 pack-years         | 30 to 39 pack-years           | 2.734368 | 0.556586 |
| laryngeal_cancer | 298147 | 0 | 0 pack-years         | 40 to 60 pack-years           | 3.222868 | 0.517318 |
| laryngeal_cancer | 343375 | 0 | 0 pack-years         | 41 to 61.5 pack-years         | 2.791165 | 0.696444 |
| laryngeal_cancer | 343375 | 0 | 0 pack-years         | 21 to 40 pack-years           | 2.24071  | 0.635041 |
| laryngeal_cancer | 343375 | 0 | 0 pack-years         | 21 to 40 pack-years           | 2.186051 | 0.696515 |
| laryngeal_cancer | 343375 | 0 | 0 pack-years         | 41 to 61.5 pack-years         | 2.140066 | 0.627251 |
| laryngeal_cancer | 343375 | 0 | 0 pack-years         | 1 to 20 pack-years            | 2.04122  | 1.371588 |
| laryngeal_cancer | 343375 | 0 | 0 pack-years         | 1 to 20 pack-years            | 1.987874 | 0.69891  |
| laryngeal_cancer | 343375 | 1 | 0 pack-years         | 21 to 31.5 pack-years         | 0.875469 | 1.349915 |
| laryngeal_cancer | 343375 | 0 | 0 pack-years         | 1 to 20 pack-years            | 2.104134 | 0.609756 |
| laryngeal_cancer | 364113 | 0 | 0 pack-years         | 1 to 29 pack-years            | 1.950187 | 0.163294 |
| laryngeal_cancer | 364113 | 0 | 0 pack-years         | 30 to 39 pack-years           | 2.66026  | 0.190881 |
| laryngeal_cancer | 364113 | 0 | 0 pack-years         | 40 to 49 pack-years           | 2.821379 | 0.220177 |
| laryngeal_cancer | 364113 | 0 | 0 pack-years         | 60 to 90 pack-years           | 3.077312 | 0.306828 |
| laryngeal_cancer | 364113 | 0 | 0 pack-years         | 50 to 59 pack-years           | 3.144152 | 0.269397 |
| laryngeal_cancer | 502130 | 0 | 0 pack-years         | 20 to 29 pack-years           | 2.933325 | 0.677798 |
| laryngeal_cancer | 502130 | 1 | 0 pack-years         | 0 to 10 pack-years            | 2.515274 | 0.876388 |
| laryngeal_cancer | 502130 | 0 | 0 pack-years         | 10 to 19 pack-years           | 2.60343  | 0.717491 |
| laryngeal_cancer | 502130 | 0 | 0 pack-years         | 30 to 45 pack-years           | 3.125005 | 0.620322 |
| lbp              | 259680 | 0 | 0 cigarettes per day | 1 to 9 cigarettes per day     | 0.48858  | 0.311444 |
| lbp              | 348202 | 1 | 0 cigarettes per day | 11 to 20 cigarettes per day   | -0.10536 | 0.226757 |
| lbp              | 348202 | 0 | 0 cigarettes per day | 21 to 31.5 cigarettes per day | 0.09531  | 0.347866 |
| lbp              | 348202 | 0 | 0 cigarettes per day | 11 to 20 cigarettes per day   | 0.182322 | 0.510204 |
| lbp              | 348202 | 0 | 0 cigarettes per day | 1 to 10 cigarettes per day    | 0.182322 | 0.552721 |
| lbp              | 348202 | 0 | 0 cigarettes per day | 1 to 10 cigarettes per day    | 0.182322 | 0.233844 |
| lbp              | 348202 | 0 | 0 cigarettes per day | 21 to 31.5 cigarettes per day | 1.704748 | 0.496289 |
| lbp              | 348204 | 0 | 0 cigarettes per day | 1 to 25 cigarettes per day    | 0.824175 | 0.37594  |
| lbp              | 348204 | 0 | 0 cigarettes per day | 25 to 37.5 cigarettes per day | 1.329724 | 1.126363 |
| lbp              | 348206 | 0 | 0 cigarettes per day | 1 to 9 cigarettes per day     | 0.985817 | 0.377894 |
| lbp              | 348206 | 0 | 0 cigarettes per day | 10 to 15 cigarettes per day   | 0.943906 | 0.53899  |
| lbp              | 348206 | 0 | 0 cigarettes per day | 10 to 15 cigarettes per day   | 0.779325 | 0.471588 |
| lbp              | 348206 | 0 | 0 cigarettes per day | 1 to 9 cigarettes per day     | 0.871293 | 0.286056 |
| lbp              | 348208 | 0 | 0 cigarettes per day | 1 to 10 cigarettes per day    | 0.470004 | 0.165816 |
| lbp              | 348208 | 0 | 0 cigarettes per day | 11 to 20 cigarettes per day   | 0.756122 | 0.156894 |



|          |        |   |                      |                               |          |          |
|----------|--------|---|----------------------|-------------------------------|----------|----------|
| lbp      | 348208 | 0 | 0 cigarettes per day | 21 to 31.5 cigarettes per day | 1.386294 | 0.852679 |
| lbp      | 409803 | 0 | 0 cigarettes per day | 21 to 30 cigarettes per day   | 0.029559 | 3.118313 |
| lbp      | 409803 | 1 | 0 cigarettes per day | 11 to 20 cigarettes per day   | -0.31471 | 4.399811 |
| lbp      | 409803 | 0 | 0 cigarettes per day | 1 to 10 cigarettes per day    | 0.29267  | 2.396912 |
| leukemia | 328339 | 0 | 0 pack-years         | 40 to 59 pack-years           | 0.688135 | 0.893498 |
| leukemia | 328339 | 0 | 0 pack-years         | 20 to 39 pack-years           | 0.883768 | 0.729465 |
| leukemia | 328339 | 0 | 0 pack-years         | 0 to 19 pack-years            | 0.963174 | 1.040855 |
| leukemia | 328339 | 1 | 0 pack-years         | 20 to 39 pack-years           | 1.108563 | 1.877484 |
| leukemia | 328339 | 0 | 0 pack-years         | 61 to 91.5 pack-years         | 1.644805 | 0.971653 |
| leukemia | 343390 | 0 | 0 pack-years         | 10 to 19 pack-years           | 1.075002 | 1.229365 |
| leukemia | 343390 | 1 | 0 pack-years         | 0 to 9 pack-years             | 0.920283 | 2.031669 |
| leukemia | 343390 | 0 | 0 pack-years         | 20 to 29 pack-years           | 0.845868 | 1.579881 |
| leukemia | 343390 | 0 | 0 pack-years         | 20 to 29 pack-years           | 0.845868 | 1.557984 |
| leukemia | 343390 | 0 | 0 pack-years         | 31 to 46.5 pack-years         | 0.703098 | 0.386442 |
| leukemia | 343390 | 0 | 0 pack-years         | 31 to 46.5 pack-years         | 0.542324 | 0.364855 |
| leukemia | 343390 | 0 | 0 pack-years         | 20 to 29 pack-years           | 0.451076 | 1.298258 |
| leukemia | 343390 | 0 | 0 pack-years         | 0 to 9 pack-years             | 0.398776 | 0.58896  |
| leukemia | 343390 | 0 | 0 pack-years         | 31 to 46.5 pack-years         | 0.314811 | 0.657307 |
| leukemia | 343390 | 0 | 0 pack-years         | 10 to 19 pack-years           | 0.29267  | 0.969007 |
| leukemia | 343390 | 0 | 0 pack-years         | 31 to 46.5 pack-years         | 0.223144 | 1.032653 |
| leukemia | 343390 | 0 | 0 pack-years         | 20 to 29 pack-years           | 0.039221 | 0.537186 |
| leukemia | 343390 | 1 | 0 pack-years         | 0 to 9 pack-years             | -0.46204 | 2.040816 |
| leukemia | 343390 | 1 | 0 pack-years         | 20 to 29 pack-years           | -1.20397 | 2.142857 |
| leukemia | 343390 | 0 | 0 pack-years         | 10 to 19 pack-years           | 0.405465 | 0.52381  |
| leukemia | 502130 | 0 | 0 pack-years         | 10 to 19 pack-years           | 0.41871  | 0.38132  |
| leukemia | 502130 | 0 | 0 pack-years         | 30 to 45 pack-years           | 0.182322 | 0.398217 |
| leukemia | 502130 | 0 | 0 pack-years         | 20 to 29 pack-years           | -0.11653 | 0.519266 |
| leukemia | 502130 | 0 | 0 pack-years         | 0 to 10 pack-years            | 0.307485 | 0.520517 |
| leukemia | 502130 | 0 | 0 pack-years         | 0 to 10 pack-years            | -0.46204 | 0.727712 |
| leukemia | 502130 | 1 | 0 pack-years         | 20 to 29 pack-years           | -1.60944 | 0.983983 |
| leukemia | 502130 | 0 | 0 pack-years         | 10 to 19 pack-years           | 0.350657 | 0.376078 |
| leukemia | 502130 | 0 | 0 pack-years         | 30 to 45 pack-years           | -0.30111 | 0.462688 |
| leukemia | 502184 | 0 | 0 pack-years         | 1 to 9 pack-years             | 0.559616 | 0.393645 |
| leukemia | 502184 | 0 | 0 pack-years         | 10 to 19 pack-years           | 0.378436 | 0.517511 |
| leukemia | 502184 | 0 | 0 pack-years         | 20 to 30 pack-years           | 0.565314 | 0.411216 |
| leukemia | 502184 | 0 | 0 pack-years         | 1 to 9 pack-years             | 0.405465 | 0.353647 |
| leukemia | 502184 | 0 | 0 pack-years         | 10 to 19 pack-years           | 0.270027 | 0.419219 |
| leukemia | 502184 | 0 | 0 pack-years         | 20 to 30 pack-years           | -0.17435 | 0.402385 |
| leukemia | 502395 | 0 | 0 pack-years         | 1 to 19 pack-years            | -0.0202  | 0.283277 |
| leukemia | 502395 | 0 | 0 pack-years         | 20 to 30 pack-years           | 0.09531  | 0.307136 |
| leukemia | 502397 | 0 | 0 pack-years         | 1 to 20 pack-years            | 0.239017 | 0.152645 |
| leukemia | 502397 | 0 | 0 pack-years         | 21 to 31.5 pack-years         | 0.254642 | 0.155844 |
| leukemia | 502419 | 0 | 0 pack-years         | 11 to 20 pack-years           | -0.10536 | 0.106644 |

|                        |        |   |              |                       |          |          |
|------------------------|--------|---|--------------|-----------------------|----------|----------|
| leukemia               | 502419 | 0 | 0 pack-years | 1 to 10 pack-years    | 0        | 0.080698 |
| leukemia               | 502419 | 0 | 0 pack-years | 20 to 30 pack-years   | 0.09531  | 0.093106 |
| lip_oral_cavity_cancer | 286841 | 0 | 0 pack-years | 1 to 19 pack-years    | 0.182322 | 0.220663 |
| lip_oral_cavity_cancer | 286841 | 0 | 0 pack-years | 20 to 39 pack-years   | 0.336472 | 0.280258 |
| lip_oral_cavity_cancer | 286841 | 0 | 0 pack-years | 40 to 60 pack-years   | 0.262364 | 0.410571 |
| lip_oral_cavity_cancer | 343375 | 1 | 0 pack-years | 1 to 20 pack-years    | 1.757858 | 0.340561 |
| lip_oral_cavity_cancer | 343375 | 1 | 0 pack-years | 21 to 40 pack-years   | 2.163323 | 0.362394 |
| lip_oral_cavity_cancer | 343375 | 0 | 0 pack-years | 41 to 61.5 pack-years | 1.808289 | 0.399397 |
| lip_oral_cavity_cancer | 343432 | 0 | 0 pack-years | 1 to 20 pack-years    | 0.270027 | 0.426194 |
| lip_oral_cavity_cancer | 343432 | 0 | 0 pack-years | 21 to 31.5 pack-years | 1.621366 | 0.535642 |
| lip_oral_cavity_cancer | 348052 | 0 | 0 pack-years | 34 to 51 pack-years   | 1.131402 | 0.394997 |
| lip_oral_cavity_cancer | 348052 | 0 | 0 pack-years | 34 to 51 pack-years   | 0.530628 | 0.45018  |
| lip_oral_cavity_cancer | 348052 | 0 | 0 pack-years | 0 to 18 pack-years    | 0.916291 | 0.428571 |
| lip_oral_cavity_cancer | 359126 | 0 | 0 pack-years | 0 to 19 pack-years    | 0.14842  | 0.134148 |
| lip_oral_cavity_cancer | 359126 | 1 | 0 pack-years | 20 to 39 pack-years   | 0.277632 | 0.086967 |
| lip_oral_cavity_cancer | 359126 | 0 | 0 pack-years | 40 to 60 pack-years   | 1.075002 | 0.165425 |
| lip_oral_cavity_cancer | 359128 | 0 | 0 pack-years | 40 to 59 pack-years   | 0.928219 | 0.45878  |
| lip_oral_cavity_cancer | 359128 | 0 | 0 pack-years | 60 to 90 pack-years   | 1.648659 | 0.48175  |
| lip_oral_cavity_cancer | 359128 | 0 | 0 pack-years | 0 to 19 pack-years    | 0.81978  | 0.54167  |
| lip_oral_cavity_cancer | 359128 | 0 | 0 pack-years | 40 to 59 pack-years   | -1.13943 | 2.112564 |
| lip_oral_cavity_cancer | 359128 | 0 | 0 pack-years | 0 to 19 pack-years    | -0.26136 | 1.232441 |
| lip_oral_cavity_cancer | 359128 | 0 | 0 pack-years | 20 to 39 pack-years   | -1.30933 | 1.209373 |
| lip_oral_cavity_cancer | 359128 | 0 | 0 pack-years | 20 to 39 pack-years   | 0.350657 | 0.45092  |
| lip_oral_cavity_cancer | 364113 | 1 | 0 pack-years | 40 to 49 pack-years   | 1.957274 | 0.194569 |
| lip_oral_cavity_cancer | 502130 | 0 | 0 pack-years | 0 to 10 pack-years    | 0.270027 | 0.601656 |
| lip_oral_cavity_cancer | 502130 | 0 | 0 pack-years | 10 to 19 pack-years   | 0.792993 | 0.368691 |
| lip_oral_cavity_cancer | 502130 | 0 | 0 pack-years | 20 to 29 pack-years   | 0.536493 | 0.434567 |
| lip_oral_cavity_cancer | 502130 | 0 | 0 pack-years | 30 to 45 pack-years   | 1.585145 | 0.258849 |
| lip_oral_cavity_cancer | 502243 | 0 | 0 pack-years | 1 to 20 pack-years    | 0.841567 | 0.377228 |
| lip_oral_cavity_cancer | 502243 | 0 | 0 pack-years | 21 to 40 pack-years   | 1.677097 | 0.381556 |
| lip_oral_cavity_cancer | 502243 | 0 | 0 pack-years | 40 to 60 pack-years   | 2.152924 | 0.364157 |
| lip_oral_cavity_cancer | 502352 | 0 | 0 pack-years | 10 to 19 pack-years   | 0.058269 | 0.591991 |
| lip_oral_cavity_cancer | 502352 | 0 | 0 pack-years | 1 to 9 pack-years     | 0.270027 | 0.822707 |
| lip_oral_cavity_cancer | 502352 | 0 | 0 pack-years | 20 to 30 pack-years   | 1.678964 | 0.548627 |
| liver_cancer           | 125938 | 0 | 0 pack-years | 0 to 19 pack-years    | 0.182322 | 0.170068 |
| liver_cancer           | 125938 | 1 | 0 pack-years | 20 to 30 pack-years   | 4.154185 | 0.510605 |
| liver_cancer           | 293871 | 0 | 0 pack-years | 11 to 16.5 pack-years | -0.10536 | 0.255102 |
| liver_cancer           | 293871 | 0 | 0 pack-years | 0 to 10 pack-years    | 0.405465 | 0.272109 |
| liver_cancer           | 328266 | 0 | 0 pack-years | 0 to 19 pack-years    | 0.530628 | 0.285114 |
| liver_cancer           | 328266 | 0 | 0 pack-years | 20 to 40 pack-years   | 0.741937 | 0.279397 |
| liver_cancer           | 328266 | 0 | 0 pack-years | 41 to 61.5 pack-years | 0.916291 | 0.336735 |
| liver_cancer           | 328339 | 0 | 0 pack-years | 60 to 90 pack-years   | 1.530395 | 1.797862 |
| liver_cancer           | 328339 | 0 | 0 pack-years | 40 to 59 pack-years   | 1.453953 | 0.73014  |

|              |        |   |                      |                               |          |          |
|--------------|--------|---|----------------------|-------------------------------|----------|----------|
| liver_cancer | 328339 | 0 | 0 pack-years         | 20 to 39 pack-years           | 0.904218 | 0.467859 |
| liver_cancer | 328339 | 0 | 0 pack-years         | 60 to 90 pack-years           | 0.593327 | 0.243827 |
| liver_cancer | 328339 | 0 | 0 pack-years         | 0 to 19 pack-years            | 0.506818 | 0.235124 |
| liver_cancer | 328339 | 0 | 0 pack-years         | 20 to 39 pack-years           | 0.482426 | 0.165344 |
| liver_cancer | 328339 | 0 | 0 pack-years         | 40 to 59 pack-years           | 0.165514 | 0.196731 |
| liver_cancer | 328339 | 0 | 0 pack-years         | 0 to 19 pack-years            | 0        | 0.517857 |
| liver_cancer | 343515 | 1 | 0 pack-years         | 50 to 75 pack-years           | -0.22314 | 3.891103 |
| liver_cancer | 343515 | 1 | 0 pack-years         | 1 to 24 pack-years            | -0.10536 | 3.458759 |
| liver_cancer | 343515 | 0 | 0 pack-years         | 25 to 49 pack-years           | 0.955511 | 1.197263 |
| liver_cancer | 343580 | 0 | 0 pack-years         | 75.05 to 112.5 pack-years     | -0.22314 | 0.560516 |
| liver_cancer | 343580 | 0 | 0 pack-years         | 50.05 to 75 pack-years        | -0.35667 | 0.611708 |
| liver_cancer | 343580 | 0 | 0 pack-years         | 25.05 to 50 pack-years        | -0.35667 | 0.470874 |
| liver_cancer | 343580 | 0 | 0 pack-years         | 0.05 to 25 pack-years         | 0.336472 | 0.517385 |
| liver_cancer | 343580 | 0 | 0 pack-years         | 25 to 50 pack-years           | -0.35667 | 0.58309  |
| liver_cancer | 343580 | 0 | 0 pack-years         | 76 to 100 pack-years          | -0.22314 | 0.765306 |
| liver_cancer | 343580 | 0 | 0 pack-years         | 50 to 75 pack-years           | -0.35667 | 0.728863 |
| liver_cancer | 343580 | 0 | 0 pack-years         | 0.05 to 25 pack-years         | 0.336472 | 0.601312 |
| liver_cancer | 343586 | 0 | 0 pack-years         | 0 to 24 pack-years            | 0.693147 | 1.556441 |
| liver_cancer | 343586 | 0 | 0 pack-years         | 25 to 49 pack-years           | 1.013054 | 1.130313 |
| liver_cancer | 343586 | 0 | 0 pack-years         | 50 to 75 pack-years           | 1.064366 | 1.073778 |
| liver_cancer | 343586 | 0 | 0 pack-years         | 0 to 24 pack-years            | 1.48024  | 0.708439 |
| liver_cancer | 343588 | 0 | 0 pack-years         | 0 to 19 pack-years            | 0.131028 | 0.373702 |
| liver_cancer | 343588 | 0 | 0 pack-years         | 40 to 60 pack-years           | 0.086178 | 0.372121 |
| liver_cancer | 343588 | 0 | 0 pack-years         | 20 to 39 pack-years           | 0.086178 | 0.369781 |
| liver_cancer | 343590 | 1 | 0 pack-years         | 21 to 31.5 pack-years         | -0.35667 | 0.291545 |
| liver_cancer | 343590 | 0 | 0 pack-years         | 1 to 20 pack-years            | -0.10536 | 0.340136 |
| liver_cancer | 343632 | 0 | 0 pack-years         | 13 to 19.5 pack-years         | 0.587787 | 0.410998 |
| liver_cancer | 343632 | 0 | 0 pack-years         | 0.1 to 12.9 pack-years        | 0.875469 | 0.403912 |
| liver_cancer | 502130 | 0 | 0 pack-years         | 20 to 29 pack-years           | 0.470004 | 0.352047 |
| liver_cancer | 502130 | 0 | 0 pack-years         | 10 to 19 pack-years           | 0.131028 | 0.393657 |
| liver_cancer | 502130 | 0 | 0 pack-years         | 30 to 45 pack-years           | -0.22314 | 0.423364 |
| lri          | 173863 | 0 | 0 cigarettes per day | 1 to 14 cigarettes per day    | 0.463734 | 1.707098 |
| lri          | 173863 | 0 | 0 cigarettes per day | 15 to 24 cigarettes per day   | 0.774727 | 1.250823 |
| lri          | 173863 | 0 | 0 cigarettes per day | 25 to 37.5 cigarettes per day | 0.8671   | 1.140456 |
| lri          | 236197 | 0 | 0 cigarettes per day | 0 to 9 cigarettes per day     | 0.722706 | 1.317614 |
| lri          | 236197 | 0 | 0 cigarettes per day | 10 to 19 cigarettes per day   | 1.118415 | 0.887021 |
| lri          | 236197 | 0 | 0 cigarettes per day | 20 to 30 cigarettes per day   | 1.48614  | 0.614092 |
| lri          | 298305 | 0 | 0 cigarettes per day | 0 to 24 cigarettes per day    | 0.350657 | 0.269474 |
| lri          | 298305 | 0 | 0 cigarettes per day | 25 to 37.5 cigarettes per day | 0.378436 | 0.396631 |
| lri          | 298305 | 0 | 0 cigarettes per day | 0 to 24 cigarettes per day    | 0.512824 | 0.172614 |
| lri          | 298305 | 0 | 0 cigarettes per day | 25 to 37.5 cigarettes per day | 0.932164 | 0.320384 |
| lri          | 355108 | 0 | 0 cigarettes per day | 15 to 24 cigarettes per day   | 1.308333 | 0.413679 |
| lri          | 355108 | 0 | 0 cigarettes per day | 25 to 37.5 cigarettes per day | 1.704748 | 0.482375 |

|             |        |   |                      |                               |          |          |
|-------------|--------|---|----------------------|-------------------------------|----------|----------|
| lri         | 355108 | 0 | 0 cigarettes per day | 1 to 14 cigarettes per day    | 0.832909 | 0.332742 |
| lri         | 355112 | 0 | 0 cigarettes per day | 1 to 9 cigarettes per day     | 0.215111 | 0.357966 |
| lri         | 355112 | 0 | 0 cigarettes per day | 10 to 20 cigarettes per day   | 0.858662 | 0.291854 |
| lri         | 355112 | 0 | 0 cigarettes per day | 21 to 31.5 cigarettes per day | 1.088562 | 0.368481 |
| lri         | 355955 | 1 | 0 cigarettes per day | 25 to 37.5 cigarettes per day | -1.13943 | 8.482143 |
| lri         | 355955 | 0 | 0 cigarettes per day | 1 to 14 cigarettes per day    | 0.371564 | 1.871921 |
| lri         | 355955 | 0 | 0 cigarettes per day | 15 to 24 cigarettes per day   | 1.098612 | 0.904762 |
| lri         | 413804 | 0 | 0 cigarettes per day | 10 to 19 cigarettes per day   | 0.604316 | 0.179772 |
| lri         | 413804 | 0 | 0 cigarettes per day | 10 to 19 cigarettes per day   | 0.604316 | 0.184008 |
| lri         | 413804 | 1 | 0 cigarettes per day | 0 to 9 cigarettes per day     | 0.667829 | 0.074568 |
| lri         | 413804 | 0 | 0 cigarettes per day | 20 to 30 cigarettes per day   | 1.193922 | 0.176252 |
| lri         | 413804 | 0 | 0 cigarettes per day | 1 to 10 cigarettes per day    | 0.667829 | 0.18052  |
| lri         | 413804 | 0 | 0 cigarettes per day | 20 to 30 cigarettes per day   | 1.193922 | 0.172995 |
| lung_cancer | 193948 | 0 | 0 pack-years         | 33.33 to 57.33 pack-years     | 0.774727 | 0.951049 |
| lung_cancer | 193948 | 0 | 0 pack-years         | 3.33 to 32.33 pack-years      | 0.95935  | 0.892368 |
| lung_cancer | 193948 | 0 | 0 pack-years         | 58.33 to 87.495 pack-years    | 1.547563 | 1.105623 |
| lung_cancer | 193987 | 0 | 0 pack-years         | 1 to 39 pack-years            | 0.65752  | 0.278894 |
| lung_cancer | 193987 | 0 | 0 pack-years         | 1 to 39 pack-years            | 1.319086 | 0.187575 |
| lung_cancer | 193987 | 1 | 0 pack-years         | 40 to 60 pack-years           | 1.690096 | 0.121432 |
| lung_cancer | 193987 | 1 | 0 pack-years         | 40 to 60 pack-years           | 2.259678 | 0.067903 |
| lung_cancer | 250095 | 0 | 0 pack-years         | 40 to 60 pack-years           | 1.976855 | 0.358627 |
| lung_cancer | 250095 | 1 | 0 pack-years         | 60 to 90 pack-years           | 1.490654 | 0.146511 |
| lung_cancer | 250095 | 1 | 0 pack-years         | 40 to 59 pack-years           | 1.050822 | 0.126659 |
| lung_cancer | 250095 | 0 | 0 pack-years         | 20 to 39 pack-years           | 1.366092 | 0.292196 |
| lung_cancer | 250095 | 0 | 0 pack-years         | 0 to 19 pack-years            | 0.559616 | 0.325073 |
| lung_cancer | 250095 | 0 | 0 pack-years         | 0 to 19 pack-years            | 0.14842  | 0.255102 |
| lung_cancer | 250095 | 1 | 0 pack-years         | 20 to 39 pack-years           | 0.741937 | 0.13241  |
| lung_cancer | 286844 | 0 | 0 pack-years         | 0.05 to 12.5 pack-years       | 0.587787 | 0.481859 |
| lung_cancer | 286844 | 0 | 0 pack-years         | 12.5 to 25 pack-years         | 2.140066 | 0.381152 |
| lung_cancer | 286844 | 0 | 0 pack-years         | 26 to 39 pack-years           | 4.213608 | 0.434353 |
| lung_cancer | 298142 | 0 | 0 pack-years         | 1 to 10 pack-years            | 0.587787 | 0.198413 |
| lung_cancer | 298142 | 0 | 0 pack-years         | 11 to 20 pack-years           | 1.458615 | 0.201709 |
| lung_cancer | 298142 | 0 | 0 pack-years         | 21 to 31.5 pack-years         | 1.916923 | 0.22509  |
| lung_cancer | 321342 | 1 | 0 pack-years         | 0 to 25 pack-years            | 2.451005 | 0.07917  |
| lung_cancer | 321342 | 0 | 0 pack-years         | 25 to 40 pack-years           | 3.025291 | 0.070586 |
| lung_cancer | 328215 | 0 | 0 pack-years         | 35 to 52.5 pack-years         | 1.979621 | 0.37913  |
| lung_cancer | 328215 | 0 | 0 pack-years         | 21 to 34 pack-years           | 1.211941 | 0.378098 |
| lung_cancer | 328215 | 0 | 0 pack-years         | 1 to 10 pack-years            | 0.41871  | 0.530344 |
| lung_cancer | 328215 | 0 | 0 pack-years         | 11 to 15 pack-years           | 0.512824 | 0.597275 |
| lung_cancer | 328215 | 0 | 0 pack-years         | 16 to 20 pack-years           | 0.916291 | 0.495918 |
| lung_cancer | 328266 | 0 | 0 pack-years         | 0 to 19 pack-years            | 0.832909 | 0.354925 |
| lung_cancer | 328266 | 0 | 0 pack-years         | 20 to 40 pack-years           | 1.504077 | 0.323129 |
| lung_cancer | 328266 | 0 | 0 pack-years         | 41 to 61.5 pack-years         | 1.667707 | 0.346554 |

|             |        |   |              |                           |          |          |
|-------------|--------|---|--------------|---------------------------|----------|----------|
| lung_cancer | 328909 | 0 | 0 pack-years | 0 to 9 pack-years         | 1.499623 | 0.334821 |
| lung_cancer | 328909 | 0 | 0 pack-years | 10 to 18 pack-years       | 1.913977 | 0.267895 |
| lung_cancer | 328909 | 0 | 0 pack-years | 20 to 28 pack-years       | 2.428336 | 0.252628 |
| lung_cancer | 328909 | 0 | 0 pack-years | 30 to 45 pack-years       | 2.821974 | 0.243265 |
| lung_cancer | 334460 | 0 | 0 pack-years | 0 to 25 pack-years        | 2.885917 | 0.251685 |
| lung_cancer | 334460 | 0 | 0 pack-years | 0 to 25 pack-years        | 2.800325 | 0.488803 |
| lung_cancer | 334460 | 0 | 0 pack-years | 16 to 24 pack-years       | 2.651833 | 0.288924 |
| lung_cancer | 334460 | 0 | 0 pack-years | 16 to 24 pack-years       | 2.329227 | 0.358435 |
| lung_cancer | 334460 | 0 | 0 pack-years | 1 to 4 pack-years         | 0.48858  | 0.583761 |
| lung_cancer | 334460 | 0 | 0 pack-years | 6 to 14 pack-years        | 1.479329 | 0.298684 |
| lung_cancer | 334460 | 0 | 0 pack-years | 1 to 4 pack-years         | 0.746688 | 0.315553 |
| lung_cancer | 334460 | 0 | 0 pack-years | 6 to 14 pack-years        | 1.83737  | 0.244947 |
| lung_cancer | 343580 | 0 | 0 pack-years | 50.05 to 75 pack-years    | 2.778819 | 0.328431 |
| lung_cancer | 343580 | 0 | 0 pack-years | 75.05 to 112.5 pack-years | 3.332205 | 0.335417 |
| lung_cancer | 343580 | 0 | 0 pack-years | 25.05 to 50 pack-years    | 2.292535 | 0.321637 |
| lung_cancer | 343580 | 0 | 0 pack-years | 0.05 to 25 pack-years     | 1.481605 | 0.347782 |
| lung_cancer | 343580 | 0 | 0 pack-years | 50 to 75 pack-years       | 2.778819 | 0.35334  |
| lung_cancer | 343580 | 0 | 0 pack-years | 25 to 50 pack-years       | 2.292535 | 0.34529  |
| lung_cancer | 343580 | 0 | 0 pack-years | 0.05 to 25 pack-years     | 1.481605 | 0.371058 |
| lung_cancer | 343580 | 0 | 0 pack-years | 76 to 100 pack-years      | 3.332205 | 0.359876 |
| lung_cancer | 355961 | 0 | 0 pack-years | 0 to 30 pack-years        | 1.84055  | 0.364431 |
| lung_cancer | 355961 | 0 | 0 pack-years | 31 to 45 pack-years       | 2.197225 | 0.348639 |
| lung_cancer | 355961 | 0 | 0 pack-years | 47 to 70.5 pack-years     | 3.148453 | 0.326268 |
| lung_cancer | 355963 | 0 | 0 pack-years | 20 to 39 pack-years       | 2.24071  | 0.369084 |
| lung_cancer | 355963 | 0 | 0 pack-years | 1 to 19 pack-years        | 1.064711 | 0.510204 |
| lung_cancer | 355963 | 0 | 0 pack-years | 40 to 60 pack-years       | 2.867899 | 0.330473 |
| lung_cancer | 355965 | 0 | 0 pack-years | 0 to 25 pack-years        | 1.458615 | 0.40935  |
| lung_cancer | 355965 | 0 | 0 pack-years | 25 to 49.99 pack-years    | 2.282382 | 0.314973 |
| lung_cancer | 355965 | 0 | 0 pack-years | 50 to 75 pack-years       | 3.148453 | 0.316414 |
| lung_cancer | 355970 | 0 | 0 pack-years | 40 to 49 pack-years       | 3.478158 | 0.100781 |
| lung_cancer | 355970 | 0 | 0 pack-years | 50 to 59 pack-years       | 3.835142 | 0.116256 |
| lung_cancer | 355970 | 0 | 0 pack-years | 60 to 90 pack-years       | 3.246491 | 0.307711 |
| lung_cancer | 355970 | 0 | 0 pack-years | 60 to 90 pack-years       | 3.864931 | 0.109635 |
| lung_cancer | 355970 | 0 | 0 pack-years | 50 to 59 pack-years       | 2.884801 | 0.277904 |
| lung_cancer | 355970 | 0 | 0 pack-years | 30 to 39 pack-years       | 3.202746 | 0.085034 |
| lung_cancer | 355970 | 0 | 0 pack-years | 40 to 49 pack-years       | 2.639057 | 0.215015 |
| lung_cancer | 355970 | 0 | 0 pack-years | 30 to 39 pack-years       | 2.557227 | 0.138427 |
| lung_cancer | 355970 | 1 | 0 pack-years | 1 to 19 pack-years        | 2.186051 | 0.091722 |
| lung_cancer | 355970 | 0 | 0 pack-years | 20 to 29 pack-years       | 1.987874 | 0.118815 |
| lung_cancer | 355970 | 0 | 0 pack-years | 1 to 19 pack-years        | 1.252763 | 0.102041 |
| lung_cancer | 355970 | 0 | 0 pack-years | 20 to 29 pack-years       | 2.839078 | 0.086526 |
| lung_cancer | 357351 | 0 | 0 pack-years | 0 to 20 pack-years        | 1.743969 | 1.044491 |
| lung_cancer | 357351 | 0 | 0 pack-years | 0 to 20 pack-years        | 1.989243 | 0.690974 |

|             |        |   |              |                            |          |          |
|-------------|--------|---|--------------|----------------------------|----------|----------|
| lung_cancer | 357351 | 0 | 0 pack-years | 20 to 40 pack-years        | 2.119863 | 0.681395 |
| lung_cancer | 357351 | 0 | 0 pack-years | 41 to 61.5 pack-years      | 2.784394 | 0.775706 |
| lung_cancer | 357351 | 0 | 0 pack-years | 21 to 31.5 pack-years      | 2.995232 | 0.960429 |
| lung_cancer | 357367 | 0 | 0 pack-years | 41 to 61.5 pack-years      | 2.642622 | 0.297044 |
| lung_cancer | 357367 | 0 | 0 pack-years | 41 to 61.5 pack-years      | 2.427454 | 0.858296 |
| lung_cancer | 357367 | 0 | 0 pack-years | 20 to 40 pack-years        | 2.273156 | 0.28479  |
| lung_cancer | 357367 | 0 | 0 pack-years | 0 to 20 pack-years         | 0.57098  | 0.33293  |
| lung_cancer | 357367 | 0 | 0 pack-years | 0 to 20 pack-years         | 1.329724 | 0.288171 |
| lung_cancer | 357367 | 0 | 0 pack-years | 20 to 40 pack-years        | 1.65058  | 0.383388 |
| lung_cancer | 357400 | 0 | 0 pack-years | 1 to 29 pack-years         | 1.335001 | 0.268528 |
| lung_cancer | 357400 | 0 | 0 pack-years | 30 to 50 pack-years        | 2.028148 | 0.268528 |
| lung_cancer | 357400 | 0 | 0 pack-years | 51 to 85 pack-years        | 2.541602 | 0.269163 |
| lung_cancer | 357400 | 0 | 0 pack-years | 86 to 100 pack-years       | 2.701361 | 0.272223 |
| lung_cancer | 357402 | 0 | 0 pack-years | 40 to 60 pack-years        | 1.678964 | 0.206081 |
| lung_cancer | 357402 | 0 | 0 pack-years | 20 to 39.95 pack-years     | 1.272566 | 0.190076 |
| lung_cancer | 357402 | 0 | 0 pack-years | 40 to 60 pack-years        | 1.713798 | 0.184317 |
| lung_cancer | 357402 | 0 | 0 pack-years | 0 to 19 pack-years         | 0.65752  | 0.174474 |
| lung_cancer | 357402 | 0 | 0 pack-years | 0 to 19 pack-years         | 0.609766 | 0.280058 |
| lung_cancer | 357402 | 0 | 0 pack-years | 20 to 39.95 pack-years     | 1.205971 | 0.219968 |
| lung_cancer | 357404 | 0 | 0 pack-years | 41 to 61.5 pack-years      | 2.928524 | 0.712103 |
| lung_cancer | 357404 | 0 | 0 pack-years | 21 to 40 pack-years        | 2.721295 | 0.716635 |
| lung_cancer | 357404 | 0 | 0 pack-years | 1 to 20 pack-years         | 1.064711 | 0.844476 |
| lung_cancer | 357406 | 0 | 0 pack-years | 0 to 20 pack-years         | 0.300105 | 0.396825 |
| lung_cancer | 357406 | 0 | 0 pack-years | 60 to 90 pack-years        | 1.280934 | 0.727041 |
| lung_cancer | 357406 | 0 | 0 pack-years | 0 to 20 pack-years         | 1.373716 | 0.359726 |
| lung_cancer | 357406 | 0 | 0 pack-years | 21 to 40 pack-years        | 1.435085 | 0.358965 |
| lung_cancer | 357406 | 0 | 0 pack-years | 41 to 60 pack-years        | 1.931521 | 0.345682 |
| lung_cancer | 357406 | 0 | 0 pack-years | 41 to 60 pack-years        | 2.000128 | 0.556806 |
| lung_cancer | 357406 | 0 | 0 pack-years | 60 to 90 pack-years        | 2.046402 | 0.345409 |
| lung_cancer | 357406 | 0 | 0 pack-years | 21 to 40 pack-years        | 2.195    | 0.537476 |
| lung_cancer | 357415 | 0 | 0 pack-years | 33 to 49.5 pack-years      | 3.367296 | 0.139866 |
| lung_cancer | 357415 | 0 | 0 pack-years | 33 to 49.5 pack-years      | 3.328627 | 0.179211 |
| lung_cancer | 357415 | 0 | 0 pack-years | 19 to 32 pack-years        | 2.564949 | 0.125589 |
| lung_cancer | 357415 | 0 | 0 pack-years | 19 to 32 pack-years        | 2.541602 | 0.178772 |
| lung_cancer | 357415 | 0 | 0 pack-years | 0 to 8 pack-years          | 0.741937 | 0.218659 |
| lung_cancer | 357415 | 0 | 0 pack-years | 9 to 18 pack-years         | 1.280934 | 0.198413 |
| lung_cancer | 357415 | 0 | 0 pack-years | 0 to 8 pack-years          | 0.405465 | 0.153061 |
| lung_cancer | 357415 | 0 | 0 pack-years | 9 to 18 pack-years         | 1.410987 | 0.143106 |
| lung_cancer | 357437 | 0 | 0 pack-years | 90 to 100 pack-years       | 3.020425 | 1.029119 |
| lung_cancer | 357437 | 0 | 0 pack-years | 0 to 44 pack-years         | 1.871802 | 0.255102 |
| lung_cancer | 357437 | 0 | 0 pack-years | 45 to 89 pack-years        | 2.541602 | 0.253093 |
| lung_cancer | 357447 | 0 | 0 pack-years | 20.25 to 40 pack-years     | 1.84055  | 0.465662 |
| lung_cancer | 357447 | 0 | 0 pack-years | 40.25 to 60.375 pack-years | 2.631889 | 0.405594 |

|             |        |   |              |                       |          |          |
|-------------|--------|---|--------------|-----------------------|----------|----------|
| lung_cancer | 357447 | 0 | 0 pack-years | 0.25 to 20 pack-years | 0.262364 | 0.804553 |
| lung_cancer | 357451 | 0 | 0 pack-years | 1 to 32 pack-years    | 0.378436 | 0.232387 |
| lung_cancer | 357451 | 0 | 0 pack-years | 33 to 53 pack-years   | 1.302913 | 0.193406 |
| lung_cancer | 357451 | 0 | 0 pack-years | 54 to 81 pack-years   | 1.517323 | 0.189089 |
| lung_cancer | 357451 | 0 | 0 pack-years | 82 to 100 pack-years  | 1.528228 | 0.188698 |
| lung_cancer | 357644 | 0 | 0 pack-years | 30 to 39 pack-years   | 2.895359 | 0.217071 |
| lung_cancer | 357644 | 0 | 0 pack-years | 40 to 60 pack-years   | 2.97604  | 0.201102 |
| lung_cancer | 357644 | 0 | 0 pack-years | 20 to 29 pack-years   | 2.175887 | 0.161258 |
| lung_cancer | 357644 | 0 | 0 pack-years | 0 to 20 pack-years    | 1.238374 | 0.119431 |
| lung_cancer | 357644 | 0 | 0 pack-years | 31 to 39 pack-years   | 3.328985 | 0.114552 |
| lung_cancer | 357644 | 0 | 0 pack-years | 21 to 30 pack-years   | 2.899772 | 0.113638 |
| lung_cancer | 357644 | 1 | 0 pack-years | 0 to 20 pack-years    | 2.401525 | 0.111642 |
| lung_cancer | 357644 | 0 | 0 pack-years | 40 to 60 pack-years   | 3.613078 | 0.108182 |
| lung_cancer | 357757 | 0 | 0 pack-years | 60 to 90 pack-years   | 4.405499 | 0.753158 |
| lung_cancer | 357757 | 0 | 0 pack-years | 0 to 29 pack-years    | 1.652497 | 0.446184 |
| lung_cancer | 357757 | 0 | 0 pack-years | 0 to 29 pack-years    | 1.987874 | 0.310665 |
| lung_cancer | 357757 | 0 | 0 pack-years | 30 to 59 pack-years   | 2.397895 | 0.392161 |
| lung_cancer | 357757 | 0 | 0 pack-years | 60 to 90 pack-years   | 3.11795  | 0.465279 |
| lung_cancer | 357757 | 0 | 0 pack-years | 30 to 59 pack-years   | 3.284664 | 0.34969  |
| lung_cancer | 357765 | 0 | 0 pack-years | 51 to 60 pack-years   | 4.270676 | 0.517404 |
| lung_cancer | 357765 | 0 | 0 pack-years | 41 to 50 pack-years   | 4.051785 | 0.469343 |
| lung_cancer | 357765 | 0 | 0 pack-years | 61 to 91.5 pack-years | 4.732684 | 0.602095 |
| lung_cancer | 357765 | 0 | 0 pack-years | 31 to 40 pack-years   | 3.789177 | 0.334367 |
| lung_cancer | 357765 | 0 | 0 pack-years | 26 to 30 pack-years   | 3.577669 | 0.423103 |
| lung_cancer | 357765 | 0 | 0 pack-years | 21 to 25 pack-years   | 3.075929 | 0.375295 |
| lung_cancer | 357765 | 0 | 0 pack-years | 16 to 20 pack-years   | 2.230014 | 0.35824  |
| lung_cancer | 357765 | 0 | 0 pack-years | 11 to 15 pack-years   | 2.045109 | 0.372918 |
| lung_cancer | 357765 | 0 | 0 pack-years | 6 to 10 pack-years    | 1.302913 | 0.393051 |
| lung_cancer | 357765 | 0 | 0 pack-years | 1 to 5 pack-years     | 0.542324 | 0.456811 |
| lung_cancer | 357792 | 0 | 0 pack-years | 1 to 9 pack-years     | 0.693147 | 0.204082 |
| lung_cancer | 357792 | 0 | 0 pack-years | 10 to 19 pack-years   | 1.252763 | 0.182216 |
| lung_cancer | 357792 | 0 | 0 pack-years | 20 to 29 pack-years   | 1.774952 | 0.177274 |
| lung_cancer | 357792 | 0 | 0 pack-years | 30 to 39 pack-years   | 2.219203 | 0.169144 |
| lung_cancer | 357792 | 0 | 0 pack-years | 40 to 60 pack-years   | 3.063391 | 0.158545 |
| lung_cancer | 357961 | 0 | 0 pack-years | 40 to 60 pack-years   | 1.832581 | 0.65551  |
| lung_cancer | 357961 | 0 | 0 pack-years | 20 to 39 pack-years   | 1.437463 | 0.66472  |
| lung_cancer | 357961 | 0 | 0 pack-years | 1 to 19 pack-years    | 1.358409 | 0.667594 |
| lung_cancer | 357961 | 0 | 0 pack-years | 40 to 60 pack-years   | 1.131402 | 0.27156  |
| lung_cancer | 357961 | 0 | 0 pack-years | 1 to 19 pack-years    | 0.277632 | 0.351925 |
| lung_cancer | 357961 | 0 | 0 pack-years | 20 to 39 pack-years   | 1.166271 | 0.208214 |
| lung_cancer | 358161 | 0 | 0 pack-years | 1 to 20 pack-years    | 0.165514 | 0.462859 |
| lung_cancer | 358161 | 0 | 0 pack-years | 21 to 31.5 pack-years | 0.788457 | 0.396568 |
| lung_cancer | 358213 | 0 | 0 pack-years | 1 to 39 pack-years    | 1.423108 | 8.003442 |

|             |        |   |              |                          |          |          |
|-------------|--------|---|--------------|--------------------------|----------|----------|
| lung_cancer | 358213 | 0 | 0 pack-years | 40 to 60 pack-years      | 2.385086 | 3.058406 |
| lung_cancer | 358338 | 0 | 0 pack-years | 1 to 20 pack-years       | 1.393766 | 0.208892 |
| lung_cancer | 358338 | 0 | 0 pack-years | 20 to 50 pack-years      | 2.069391 | 0.190682 |
| lung_cancer | 358338 | 0 | 0 pack-years | 51 to 76.5 pack-years    | 2.271094 | 0.192182 |
| lung_cancer | 358479 | 0 | 0 pack-years | 40 to 60 pack-years      | 2.235269 | 2.001087 |
| lung_cancer | 358479 | 0 | 0 pack-years | 1 to 40 pack-years       | 0.645007 | 1.290902 |
| lung_cancer | 358502 | 0 | 0 pack-years | 0 to 19 pack-years       | 0.741937 | 0.327988 |
| lung_cancer | 358502 | 0 | 0 pack-years | 20 to 39 pack-years      | 1.131402 | 0.213957 |
| lung_cancer | 358502 | 0 | 0 pack-years | 40 to 59 pack-years      | 1.774952 | 0.203217 |
| lung_cancer | 358502 | 0 | 0 pack-years | 60 to 90 pack-years      | 2.04122  | 0.228598 |
| lung_cancer | 358552 | 0 | 0 pack-years | 20 to 38 pack-years      | 2.901422 | 0.220061 |
| lung_cancer | 358552 | 0 | 0 pack-years | 40 to 60 pack-years      | 2.509599 | 0.29036  |
| lung_cancer | 358552 | 0 | 0 pack-years | 40 to 60 pack-years      | 3.74242  | 0.213391 |
| lung_cancer | 358552 | 0 | 0 pack-years | 1 to 18 pack-years       | 1.774952 | 0.250778 |
| lung_cancer | 358552 | 0 | 0 pack-years | 1 to 18 pack-years       | 0.587787 | 0.255102 |
| lung_cancer | 358552 | 0 | 0 pack-years | 20 to 38 pack-years      | 1.931521 | 0.232919 |
| lung_cancer | 358558 | 0 | 0 pack-years | 0 to 34 pack-years       | 0.891998 | 0.531114 |
| lung_cancer | 358558 | 0 | 0 pack-years | 35 to 52.5 pack-years    | 1.675226 | 0.471987 |
| lung_cancer | 358563 | 0 | 0 pack-years | 0 to 18 pack-years       | 0.65752  | 0.611981 |
| lung_cancer | 358563 | 0 | 0 pack-years | 20 to 38 pack-years      | 1.223775 | 0.427671 |
| lung_cancer | 358563 | 0 | 0 pack-years | 61 to 91.5 pack-years    | 1.451614 | 0.538881 |
| lung_cancer | 358563 | 0 | 0 pack-years | 40 to 58 pack-years      | 1.704748 | 0.434137 |
| lung_cancer | 358565 | 0 | 0 pack-years | 20 to 28 pack-years      | 1.774952 | 0.242131 |
| lung_cancer | 358565 | 0 | 0 pack-years | 0 to 9 pack-years        | 0.09531  | 0.20872  |
| lung_cancer | 358565 | 0 | 0 pack-years | 10 to 18 pack-years      | 1.064711 | 0.246305 |
| lung_cancer | 358565 | 0 | 0 pack-years | 30 to 45 pack-years      | 2.873565 | 0.227718 |
| lung_cancer | 358577 | 0 | 0 pack-years | 50 to 58 pack-years      | 1.928619 | 0.217282 |
| lung_cancer | 358577 | 0 | 0 pack-years | 61 to 91.5 pack-years    | 2.166765 | 0.187601 |
| lung_cancer | 358577 | 0 | 0 pack-years | 40 to 48 pack-years      | 1.76815  | 0.181096 |
| lung_cancer | 358577 | 0 | 0 pack-years | 1 to 18 pack-years       | 1.150572 | 0.219582 |
| lung_cancer | 358577 | 0 | 0 pack-years | 20 to 28 pack-years      | 1.366092 | 0.192628 |
| lung_cancer | 358577 | 0 | 0 pack-years | 30 to 38 pack-years      | 1.669592 | 0.175353 |
| lung_cancer | 358597 | 0 | 0 pack-years | 0 to 20.3 pack-years     | -1.27297 | 1.029519 |
| lung_cancer | 358597 | 0 | 0 pack-years | 21.3 to 31.95 pack-years | 2.489894 | 0.220835 |
| lung_cancer | 358717 | 0 | 0 pack-years | 0 to 33 pack-years       | 1.860975 | 0.260656 |
| lung_cancer | 358717 | 0 | 0 pack-years | 34 to 56 pack-years      | 2.424803 | 0.265487 |
| lung_cancer | 358717 | 0 | 0 pack-years | 58 to 87 pack-years      | 3.044522 | 0.269679 |
| lung_cancer | 358794 | 1 | 0 pack-years | 1 to 4 pack-years        | 1.345472 | 0.110943 |
| lung_cancer | 358794 | 1 | 0 pack-years | 1 to 4 pack-years        | 1.745716 | 0.146917 |
| lung_cancer | 358794 | 1 | 0 pack-years | 6 to 14 pack-years       | 2.539237 | 0.075906 |
| lung_cancer | 358794 | 1 | 0 pack-years | 6 to 14 pack-years       | 2.605648 | 0.103058 |
| lung_cancer | 358794 | 1 | 0 pack-years | 16 to 24 pack-years      | 3.173878 | 0.076744 |
| lung_cancer | 358794 | 1 | 0 pack-years | 16 to 24 pack-years      | 3.304686 | 0.099924 |



|             |        |   |              |                         |          |          |
|-------------|--------|---|--------------|-------------------------|----------|----------|
| lung_cancer | 359451 | 1 | 0 pack-years | 40 to 60 pack-years     | 1.247032 | 0.104093 |
| lung_cancer | 359451 | 1 | 0 pack-years | 30 to 39 pack-years     | 1.033184 | 0.139807 |
| lung_cancer | 359451 | 0 | 0 pack-years | 1 to 8 pack-years       | 0.231112 | 0.145773 |
| lung_cancer | 359451 | 0 | 0 pack-years | 10 to 18 pack-years     | 0.636577 | 0.144423 |
| lung_cancer | 359451 | 0 | 0 pack-years | 20 to 28 pack-years     | 0.955511 | 0.136381 |
| lung_cancer | 413177 | 0 | 0 pack-years | 10.9 to 22.5 pack-years | 1.808289 | 0.103435 |
| lung_cancer | 413177 | 0 | 0 pack-years | 10.9 to 22.5 pack-years | 1.722767 | 0.160774 |
| lung_cancer | 413177 | 0 | 0 pack-years | 5.4 to 10.8 pack-years  | 1.098612 | 0.231048 |
| lung_cancer | 413177 | 0 | 0 pack-years | 1 to 5.3 pack-years     | 0.693147 | 0.333758 |
| lung_cancer | 413177 | 1 | 0 pack-years | 22.6 to 33.9 pack-years | 0.693147 | 0.08797  |
| lung_cancer | 413177 | 1 | 0 pack-years | 10.9 to 22.5 pack-years | 0.470004 | 0.077903 |
| lung_cancer | 413177 | 0 | 0 pack-years | 5.4 to 10.8 pack-years  | 0.262364 | 0.135364 |
| lung_cancer | 413177 | 0 | 0 pack-years | 22.6 to 33.9 pack-years | 2.517696 | 0.104276 |
| lung_cancer | 413177 | 0 | 0 pack-years | 5.4 to 10.8 pack-years  | 1.223775 | 0.13994  |
| lung_cancer | 413177 | 0 | 0 pack-years | 10.9 to 22.5 pack-years | 3.353407 | 0.409372 |
| lung_cancer | 413177 | 0 | 0 pack-years | 22.6 to 33.9 pack-years | 2.424803 | 1.029894 |
| lung_cancer | 413177 | 0 | 0 pack-years | 10.9 to 22.5 pack-years | 2.370244 | 0.557347 |
| lung_cancer | 413177 | 0 | 0 pack-years | 5.4 to 10.8 pack-years  | 2.00148  | 0.560516 |
| lung_cancer | 413177 | 0 | 0 pack-years | 1 to 5.3 pack-years     | 2.151762 | 0.62701  |
| lung_cancer | 413177 | 0 | 0 pack-years | 22.6 to 33.9 pack-years | 0.182322 | 0.965354 |
| lung_cancer | 413177 | 0 | 0 pack-years | 5.4 to 10.8 pack-years  | 0.741937 | 0.329333 |
| lung_cancer | 413177 | 0 | 0 pack-years | 22.6 to 33.9 pack-years | 2.60269  | 1.029143 |
| lung_cancer | 413177 | 0 | 0 pack-years | 22.6 to 33.9 pack-years | 2.406945 | 0.165411 |
| lung_cancer | 413177 | 0 | 0 pack-years | 5.4 to 10.8 pack-years  | 3.321432 | 0.384998 |
| lung_cancer | 413177 | 0 | 0 pack-years | 1 to 5.3 pack-years     | 0.955511 | 0.176823 |
| lung_cancer | 419667 | 0 | 0 pack-years | 51 to 76.5 pack-years   | 3.218876 | 0.834694 |
| lung_cancer | 419667 | 0 | 0 pack-years | 30 to 50 pack-years     | 2.639057 | 0.881924 |
| lung_cancer | 419667 | 0 | 0 pack-years | 1 to 30 pack-years      | 1.916923 | 0.829082 |
| lung_cancer | 419669 | 0 | 0 pack-years | 1 to 33 pack-years      | 0.641854 | 0.37594  |
| lung_cancer | 419669 | 0 | 0 pack-years | 34 to 54 pack-years     | 1.871802 | 0.33752  |
| lung_cancer | 419669 | 0 | 0 pack-years | 55 to 84 pack-years     | 2.674149 | 0.343068 |
| lung_cancer | 419669 | 0 | 0 pack-years | 85 to 100 pack-years    | 2.778819 | 0.345418 |
| lung_cancer | 419671 | 0 | 0 pack-years | 20 to 39 pack-years     | -0.91629 | 2.933673 |
| lung_cancer | 419671 | 0 | 0 pack-years | 1 to 19 pack-years      | 0.641854 | 0.308808 |
| lung_cancer | 419671 | 0 | 0 pack-years | 20 to 39 pack-years     | 0.693147 | 0.369898 |
| lung_cancer | 419671 | 0 | 0 pack-years | 1 to 19 pack-years      | 0.916291 | 0.520408 |
| lung_cancer | 419671 | 0 | 0 pack-years | 40 to 60 pack-years     | 1.193922 | 0.494743 |
| lung_cancer | 419675 | 0 | 0 pack-years | 40 to 60 pack-years     | 3.981549 | 0.238444 |
| lung_cancer | 419675 | 0 | 0 pack-years | 20 to 39 pack-years     | 3.449988 | 0.95724  |
| lung_cancer | 419675 | 0 | 0 pack-years | 20 to 39 pack-years     | 3.404525 | 0.231372 |
| lung_cancer | 419675 | 0 | 0 pack-years | 20 to 39 pack-years     | 3.317816 | 0.561964 |
| lung_cancer | 419675 | 0 | 0 pack-years | 40 to 60 pack-years     | 2.476538 | 0.437318 |
| lung_cancer | 419675 | 0 | 0 pack-years | 40 to 60 pack-years     | 3.511545 | 0.794243 |

|             |        |   |              |                       |          |          |
|-------------|--------|---|--------------|-----------------------|----------|----------|
| lung_cancer | 419675 | 0 | 0 pack-years | 0 to 19 pack-years    | 2.140066 | 0.231092 |
| lung_cancer | 419675 | 0 | 0 pack-years | 0 to 19 pack-years    | 1.974081 | 0.60941  |
| lung_cancer | 419675 | 0 | 0 pack-years | 0 to 19 pack-years    | 1.648659 | 0.539639 |
| lung_cancer | 419675 | 0 | 0 pack-years | 20 to 39 pack-years   | 2.282382 | 0.304561 |
| lung_cancer | 419675 | 0 | 0 pack-years | 0 to 19 pack-years    | 0.530628 | 0.22509  |
| lung_cancer | 419696 | 0 | 0 pack-years | 1 to 29 pack-years    | 1.193922 | 0.448361 |
| lung_cancer | 419696 | 0 | 0 pack-years | 30 to 44 pack-years   | 2.476538 | 0.454468 |
| lung_cancer | 419696 | 0 | 0 pack-years | 45 to 67.5 pack-years | 3.693867 | 0.467052 |
| lung_cancer | 419717 | 0 | 0 pack-years | 21 to 30 pack-years   | 2.318458 | 0.274938 |
| lung_cancer | 419717 | 0 | 0 pack-years | 31 to 46.5 pack-years | 3.165053 | 0.258333 |
| lung_cancer | 419717 | 0 | 0 pack-years | 1 to 10 pack-years    | 1.311032 | 0.251664 |
| lung_cancer | 419717 | 0 | 0 pack-years | 11 to 20 pack-years   | 1.948763 | 0.263097 |
| lung_cancer | 419728 | 0 | 0 pack-years | 1 to 19 pack-years    | 1.105257 | 0.268617 |
| lung_cancer | 419728 | 0 | 0 pack-years | 20 to 29 pack-years   | 2.543176 | 0.350164 |
| lung_cancer | 419728 | 0 | 0 pack-years | 30 to 45 pack-years   | 3.255015 | 0.314153 |
| lung_cancer | 426275 | 0 | 0 pack-years | 80 to 100 pack-years  | 3.238678 | 0.113045 |
| lung_cancer | 426275 | 0 | 0 pack-years | 80 to 100 pack-years  | 3.86073  | 0.102041 |
| lung_cancer | 426275 | 0 | 0 pack-years | 60 to 79 pack-years   | 3.763523 | 0.09411  |
| lung_cancer | 426275 | 0 | 0 pack-years | 60 to 79 pack-years   | 3.678829 | 0.108225 |
| lung_cancer | 426275 | 0 | 0 pack-years | 80 to 100 pack-years  | 3.591818 | 0.103306 |
| lung_cancer | 426275 | 0 | 0 pack-years | 40 to 59 pack-years   | 3.401197 | 0.072279 |
| lung_cancer | 426275 | 0 | 0 pack-years | 60 to 79 pack-years   | 3.397858 | 0.104088 |
| lung_cancer | 426275 | 0 | 0 pack-years | 40 to 59 pack-years   | 3.367296 | 0.097643 |
| lung_cancer | 426275 | 0 | 0 pack-years | 40 to 59 pack-years   | 3.202746 | 0.099552 |
| lung_cancer | 426275 | 0 | 0 pack-years | 80 to 100 pack-years  | 3.903991 | 0.104407 |
| lung_cancer | 426275 | 0 | 0 pack-years | 60 to 79 pack-years   | 3.144152 | 0.100062 |
| lung_cancer | 426275 | 0 | 0 pack-years | 0 to 19 pack-years    | 1.601406 | 0.115207 |
| lung_cancer | 426275 | 0 | 0 pack-years | 20 to 39 pack-years   | 2.360854 | 0.082307 |
| lung_cancer | 426275 | 1 | 0 pack-years | 0 to 19 pack-years    | 2.509599 | 0.129003 |
| lung_cancer | 426275 | 1 | 0 pack-years | 0 to 19 pack-years    | 2.70805  | 0.078231 |
| lung_cancer | 426275 | 0 | 0 pack-years | 20 to 39 pack-years   | 3.186353 | 0.112793 |
| lung_cancer | 426275 | 1 | 0 pack-years | 0 to 19 pack-years    | 2.833213 | 0.117047 |
| lung_cancer | 426275 | 0 | 0 pack-years | 40 to 59 pack-years   | 2.879198 | 0.078824 |
| lung_cancer | 426275 | 1 | 0 pack-years | 20 to 39 pack-years   | 3.095578 | 0.07503  |
| lung_cancer | 426275 | 0 | 0 pack-years | 20 to 39 pack-years   | 2.76001  | 0.109791 |
| lung_cancer | 450624 | 0 | 0 pack-years | 15 to 30 pack-years   | 1.948763 | 0.176309 |
| lung_cancer | 450624 | 0 | 0 pack-years | 1 to 15 pack-years    | 0.989541 | 0.171452 |
| lung_cancer | 450624 | 0 | 0 pack-years | 31 to 46.5 pack-years | 2.520113 | 0.186111 |
| lung_cancer | 450624 | 0 | 0 pack-years | 15 to 30 pack-years   | 1.451614 | 0.258872 |
| lung_cancer | 450624 | 0 | 0 pack-years | 1 to 15 pack-years    | 0.727549 | 0.244671 |
| lung_cancer | 450624 | 0 | 0 pack-years | 31 to 46.5 pack-years | 1.809927 | 0.278087 |
| lung_cancer | 499241 | 0 | 0 pack-years | 1 to 5 pack-years     | 1.337629 | 0.169717 |
| lung_cancer | 499241 | 0 | 0 pack-years | 6 to 15 pack-years    | 2.066863 | 0.16266  |

|             |        |   |              |                       |          |          |
|-------------|--------|---|--------------|-----------------------|----------|----------|
| lung_cancer | 499241 | 0 | 0 pack-years | 16 to 22.5 pack-years | 3.055886 | 0.160008 |
| lung_cancer | 502075 | 0 | 0 pack-years | 0.1 to 9.9 pack-years | 0.703098 | 0.133908 |
| lung_cancer | 502075 | 0 | 0 pack-years | 10 to 19.9 pack-years | 1.363537 | 0.099174 |
| lung_cancer | 502075 | 0 | 0 pack-years | 20 to 29.9 pack-years | 1.976855 | 0.089892 |
| lung_cancer | 502075 | 0 | 0 pack-years | 30 to 39.9 pack-years | 2.36368  | 0.088635 |
| lung_cancer | 502075 | 0 | 0 pack-years | 40 to 60 pack-years   | 2.899221 | 0.079635 |
| lung_cancer | 502124 | 0 | 0 pack-years | 26 to 35 pack-years   | 3.378611 | 0.175655 |
| lung_cancer | 502124 | 1 | 0 pack-years | 16 to 25 pack-years   | 3.16167  | 0.115918 |
| lung_cancer | 502124 | 0 | 0 pack-years | 35 to 52.5 pack-years | 3.653511 | 0.208709 |
| lung_cancer | 502124 | 0 | 0 pack-years | 1 to 5 pack-years     | 2.221375 | 0.298299 |
| lung_cancer | 502124 | 1 | 0 pack-years | 6 to 15 pack-years    | 2.668616 | 0.123646 |
| lung_cancer | 502126 | 1 | 0 pack-years | 1 to 29 pack-years    | 0.601361 | 0.103087 |
| lung_cancer | 502126 | 1 | 0 pack-years | 30 to 49 pack-years   | 1.067259 | 0.127873 |
| lung_cancer | 502126 | 1 | 0 pack-years | 50 to 75 pack-years   | 1.256869 | 0.163028 |
| lung_cancer | 502130 | 0 | 0 pack-years | 0 to 10 pack-years    | 0.157004 | 0.309121 |
| lung_cancer | 502130 | 0 | 0 pack-years | 10 to 19 pack-years   | 1.316408 | 0.14444  |
| lung_cancer | 502130 | 0 | 0 pack-years | 20 to 29 pack-years   | 1.774952 | 0.127076 |
| lung_cancer | 502130 | 0 | 0 pack-years | 30 to 45 pack-years   | 2.487404 | 0.094866 |
| lung_cancer | 502143 | 0 | 0 pack-years | 2.5 to 11 pack-years  | 3.76584  | 1.017146 |
| lung_cancer | 502143 | 0 | 0 pack-years | 12 to 18 pack-years   | 4.232607 | 1.024342 |
| lung_cancer | 502147 | 1 | 0 pack-years | 40 to 60 pack-years   | 0.900161 | 0.078195 |
| lung_cancer | 502147 | 1 | 0 pack-years | 1 to 39 pack-years    | 0.641854 | 0.091949 |
| lung_cancer | 502184 | 0 | 0 pack-years | 1 to 9 pack-years     | -0.44629 | 0.64545  |
| lung_cancer | 502184 | 0 | 0 pack-years | 10 to 19 pack-years   | 2.009555 | 0.370232 |
| lung_cancer | 502184 | 0 | 0 pack-years | 20 to 30 pack-years   | 2.998229 | 0.30923  |
| lung_cancer | 502184 | 0 | 0 pack-years | 1 to 9 pack-years     | 0.559616 | 0.608183 |
| lung_cancer | 502184 | 0 | 0 pack-years | 10 to 19 pack-years   | 0.277632 | 0.707293 |
| lung_cancer | 502184 | 0 | 0 pack-years | 20 to 30 pack-years   | 2.318458 | 0.439651 |
| lung_cancer | 502190 | 0 | 0 pack-years | 0 to 30 pack-years    | 1.249902 | 0.444242 |
| lung_cancer | 502190 | 0 | 0 pack-years | 0 to 30 pack-years    | 1.181727 | 0.340722 |
| lung_cancer | 502190 | 0 | 0 pack-years | 30 to 45 pack-years   | 1.742219 | 0.278195 |
| lung_cancer | 502190 | 0 | 0 pack-years | 30 to 45 pack-years   | 2.346602 | 0.509685 |
| lung_cancer | 502192 | 0 | 0 pack-years | 20 to 30 pack-years   | 2.285439 | 0.151108 |
| lung_cancer | 502192 | 1 | 0 pack-years | 0 to 20 pack-years    | 3.030134 | 0.12301  |
| lung_cancer | 502202 | 0 | 0 pack-years | 0 to 9 pack-years     | -0.21072 | 0.187965 |
| lung_cancer | 502202 | 0 | 0 pack-years | 10 to 19 pack-years   | 0.875469 | 0.18883  |
| lung_cancer | 502202 | 0 | 0 pack-years | 20 to 29 pack-years   | 1.474763 | 0.19744  |
| lung_cancer | 502202 | 0 | 0 pack-years | 30 to 45 pack-years   | 2.214846 | 0.160665 |
| lung_cancer | 502208 | 0 | 0 pack-years | 1 to 9 pack-years     | 0.076035 | 0.239733 |
| lung_cancer | 502208 | 0 | 0 pack-years | 10 to 20 pack-years   | 0.111541 | 0.245367 |
| lung_cancer | 502208 | 1 | 0 pack-years | 21 to 30 pack-years   | 0.497132 | 0.182418 |
| lung_cancer | 502208 | 1 | 0 pack-years | 31 to 40 pack-years   | 0.214305 | 0.278356 |
| lung_cancer | 502208 | 0 | 0 pack-years | 41 to 50 pack-years   | 0.798858 | 0.27012  |

|                      |        |   |                      |                             |          |          |
|----------------------|--------|---|----------------------|-----------------------------|----------|----------|
| lung_cancer          | 502208 | 0 | 0 pack-years         | 51 to 60 pack-years         | 0.383219 | 0.357386 |
| lung_cancer          | 502208 | 0 | 0 pack-years         | 61 to 91.5 pack-years       | 1.299374 | 0.304469 |
| lung_cancer          | 502213 | 0 | 0 pack-years         | 41 to 61.5 pack-years       | 2.619554 | 0.127073 |
| lung_cancer          | 502213 | 0 | 0 pack-years         | 20 to 40 pack-years         | 1.980049 | 0.134067 |
| lung_cancer          | 502213 | 0 | 0 pack-years         | 1 to 19 pack-years          | 1.019317 | 0.151592 |
| lung_cancer          | 502215 | 0 | 0 pack-years         | 1 to 39.9 pack-years        | 0.542324 | 0.189372 |
| lung_cancer          | 502215 | 1 | 0 pack-years         | 40 to 60 pack-years         | 0.920283 | 0.198394 |
| lung_cancer          | 502234 | 0 | 0 pack-years         | 1 to 19 pack-years          | 0.587787 | 0.404112 |
| lung_cancer          | 502234 | 0 | 0 pack-years         | 20 to 39 pack-years         | 2.140066 | 0.41191  |
| lung_cancer          | 502234 | 0 | 0 pack-years         | 40 to 60 pack-years         | 3.218876 | 0.437929 |
| lung_cancer          | 502234 | 0 | 0 pack-years         | 1 to 19 pack-years          | 0.09531  | 0.831147 |
| lung_cancer          | 502234 | 0 | 0 pack-years         | 20 to 39 pack-years         | 3.346389 | 1.49775  |
| lung_cancer          | 502234 | 0 | 0 pack-years         | 40 to 60 pack-years         | 2.054124 | 1.505076 |
| lung_cancer          | 502241 | 0 | 0 pack-years         | 49.5 to 74.25 pack-years    | 0.604316 | 0.668348 |
| lung_cancer          | 502241 | 0 | 0 pack-years         | 49.6 to 74.4 pack-years     | 0.565314 | 0.574545 |
| lung_cancer          | 502246 | 0 | 0 pack-years         | 40 to 60 pack-years         | 2.13771  | 0.275743 |
| lung_cancer          | 502246 | 0 | 0 pack-years         | 1 to 35 pack-years          | 1.238374 | 0.283247 |
| lung_cancer          | 502252 | 0 | 0 pack-years         | 1 to 39.9 pack-years        | 1.413423 | 0.289575 |
| lung_cancer          | 502252 | 0 | 0 pack-years         | 40 to 60 pack-years         | 1.728109 | 0.272142 |
| lung_cancer          | 502407 | 0 | 0 pack-years         | 1 to 20 pack-years          | 0.675645 | 0.1948   |
| lung_cancer          | 502407 | 0 | 0 pack-years         | 21 to 40 pack-years         | 0.957433 | 0.178998 |
| lung_cancer          | 502407 | 1 | 0 pack-years         | 41 to 60 pack-years         | 1.24973  | 0.171421 |
| lung_cancer          | 502407 | 1 | 0 pack-years         | 61 to 91.5 pack-years       | 1.374551 | 0.166037 |
| lung_cancer          | 502407 | 0 | 0 pack-years         | 1 to 5 pack-years           | 0.22594  | 0.100394 |
| lung_cancer          | 502407 | 0 | 0 pack-years         | 5 to 19 pack-years          | 1.19189  | 0.073833 |
| lung_cancer          | 502407 | 0 | 0 pack-years         | 20 to 30 pack-years         | 2.389139 | 0.056879 |
| lung_cancer          | 502421 | 0 | 0 pack-years         | 1 to 19 pack-years          | 0.972179 | 0.061423 |
| lung_cancer          | 502421 | 0 | 0 pack-years         | 1 to 19 pack-years          | 1.099545 | 0.06189  |
| lung_cancer          | 502421 | 0 | 0 pack-years         | 1 to 19 pack-years          | 0.465682 | 0.073277 |
| lung_cancer          | 502433 | 0 | 0 pack-years         | 1 to 19 pack-years          | 1.068497 | 0.275705 |
| lung_cancer          | 502433 | 0 | 0 pack-years         | 20 to 30 pack-years         | 1.268917 | 0.323224 |
| lung_cancer          | 502458 | 0 | 0 pack-years         | 0.05 to 25 pack-years       | 1.686399 | 0.353647 |
| lung_cancer          | 502458 | 0 | 0 pack-years         | 25.05 to 50 pack-years      | 2.549445 | 0.336667 |
| lung_cancer          | 502458 | 0 | 0 pack-years         | 50.05 to 75 pack-years      | 3.135494 | 0.34147  |
| lung_cancer          | 502458 | 0 | 0 pack-years         | 75.05 to 112.5 pack-years   | 3.74242  | 0.346392 |
| lung_cancer          | 502460 | 0 | 0 pack-years         | 1 to 19.9 pack-years        | -0.09431 | 0.371826 |
| lung_cancer          | 502460 | 0 | 0 pack-years         | 20 to 39 pack-years         | 1.223775 | 0.331843 |
| lung_cancer          | 502460 | 0 | 0 pack-years         | 40 to 60 pack-years         | 1.560248 | 0.347486 |
| lung_cancer          | 502482 | 1 | 0 pack-years         | 1 to 25 pack-years          | 0.245922 | 0.11096  |
| lung_cancer          | 502482 | 1 | 0 pack-years         | 1 to 25 pack-years          | 0.435089 | 0.109771 |
| macular_degeneration | 261355 | 0 | 0 cigarettes per day | 0 to 19 cigarettes per day  | 0.231112 | 0.400875 |
| macular_degeneration | 261355 | 0 | 0 cigarettes per day | 20 to 30 cigarettes per day | 0.900161 | 0.227103 |
| macular_degeneration | 359130 | 0 | 0 cigarettes per day | 15 to 24 cigarettes per day | 0.336472 | 0.291545 |

|                       |        |   |                      |                               |          |          |
|-----------------------|--------|---|----------------------|-------------------------------|----------|----------|
| macular_degeneration  | 359130 | 0 | 0 cigarettes per day | 1 to 14 cigarettes per day    | 0.470004 | 0.302934 |
| macular_degeneration  | 359130 | 0 | 0 cigarettes per day | 25 to 37.5 cigarettes per day | 0.875469 | 0.276361 |
| multiple_sclerosis    | 221241 | 0 | 0 cigarettes per day | 20 to 80 cigarettes per day   | 0.802002 | 0.551596 |
| multiple_sclerosis    | 221241 | 0 | 0 cigarettes per day | 20 to 80 cigarettes per day   | 1.20896  | 0.47863  |
| multiple_sclerosis    | 348023 | 0 | 0 cigarettes per day | 16 to 24 cigarettes per day   | 0.693147 | 0.063776 |
| multiple_sclerosis    | 348023 | 1 | 0 cigarettes per day | 0 to 4 cigarettes per day     | 0.693147 | 0.204082 |
| multiple_sclerosis    | 348023 | 0 | 0 cigarettes per day | 16 to 24 cigarettes per day   | 0.587787 | 0.113379 |
| multiple_sclerosis    | 348023 | 0 | 0 cigarettes per day | 11 to 16.5 cigarettes per day | 0.530628 | 0.07503  |
| multiple_sclerosis    | 348023 | 0 | 0 cigarettes per day | 5 to 10 cigarettes per day    | 0.530628 | 0.15006  |
| multiple_sclerosis    | 348023 | 0 | 0 cigarettes per day | 0 to 4 cigarettes per day     | 0.530628 | 0.255102 |
| multiple_sclerosis    | 348023 | 0 | 0 cigarettes per day | 16 to 24 cigarettes per day   | 0.405465 | 0.119048 |
| multiple_sclerosis    | 348023 | 1 | 0 cigarettes per day | 5 to 10 cigarettes per day    | 0.641854 | 0.120838 |
| multiple_sclerosis    | 348023 | 0 | 0 cigarettes per day | 11 to 16.5 cigarettes per day | 0.336472 | 0.127551 |
| multiple_sclerosis    | 348023 | 0 | 0 cigarettes per day | 11 to 16.5 cigarettes per day | 0.182322 | 0.127551 |
| multiple_sclerosis    | 348023 | 0 | 0 cigarettes per day | 5 to 10 cigarettes per day    | 0.09531  | 0.139147 |
| multiple_sclerosis    | 348023 | 0 | 0 cigarettes per day | 0 to 4 cigarettes per day     | 0.09531  | 0.185529 |
| multiple_sclerosis    | 348023 | 0 | 0 cigarettes per day | 0 to 4 cigarettes per day     | 0        | 0.178571 |
| multiple_sclerosis    | 348023 | 0 | 0 cigarettes per day | 5 to 10 cigarettes per day    | 0        | 0.127551 |
| multiple_sclerosis    | 348023 | 0 | 0 cigarettes per day | 16 to 24 cigarettes per day   | 0.405465 | 0.102041 |
| multiple_sclerosis    | 350715 | 0 | 0 cigarettes per day | 1 to 14 cigarettes per day    | 0.182322 | 0.212585 |
| multiple_sclerosis    | 350715 | 0 | 0 cigarettes per day | 16 to 24 cigarettes per day   | 0.336472 | 0.23688  |
| multiple_sclerosis    | 350717 | 0 | 0 cigarettes per day | 15 to 22.5 cigarettes per day | 0.587787 | 0.396825 |
| multiple_sclerosis    | 350717 | 0 | 0 cigarettes per day | 1 to 14 cigarettes per day    | 0.470004 | 0.366709 |
| multiple_sclerosis    | 369019 | 0 | 0 cigarettes per day | 0 to 9 cigarettes per day     | -0.35667 | 0.437318 |
| multiple_sclerosis    | 369019 | 0 | 0 cigarettes per day | 10 to 20 cigarettes per day   | 0.336472 | 0.291545 |
| multiple_sclerosis    | 369019 | 0 | 0 cigarettes per day | 20 to 40 cigarettes per day   | 0.641854 | 0.268528 |
| multiple_sclerosis    | 369019 | 0 | 0 cigarettes per day | 40 to 60 cigarettes per day   | 1.704748 | 0.746753 |
| multiple_sclerosis    | 369022 | 0 | 0 cigarettes per day | 14 to 21 cigarettes per day   | -0.06188 | 0.645897 |
| multiple_sclerosis    | 369022 | 0 | 0 cigarettes per day | 0 to 13 cigarettes per day    | -0.05129 | 0.725027 |
| multiple_sclerosis    | 369022 | 0 | 0 cigarettes per day | 0 to 13 cigarettes per day    | 0.019803 | 0.752801 |
| multiple_sclerosis    | 369022 | 0 | 0 cigarettes per day | 14 to 21 cigarettes per day   | 0.518794 | 0.580053 |
| nasopharyngeal_cancer | 328266 | 0 | 0 pack-years         | 41 to 61.5 pack-years         | 1.029619 | 1.685496 |
| nasopharyngeal_cancer | 328266 | 0 | 0 pack-years         | 0 to 20 pack-years            | 1.163151 | 1.100128 |
| nasopharyngeal_cancer | 328266 | 0 | 0 pack-years         | 20 to 40 pack-years           | 1.360977 | 1.03349  |
| nasopharyngeal_cancer | 328921 | 0 | 0 pack-years         | 0 to 9 pack-years             | 0.565314 | 0.933442 |
| nasopharyngeal_cancer | 328921 | 1 | 0 pack-years         | 10 to 15 pack-years           | 1.393766 | 0.714666 |
| nasopharyngeal_cancer | 328952 | 0 | 0 pack-years         | 0 to 30 pack-years            | -0.16252 | 0.464476 |
| nasopharyngeal_cancer | 328952 | 0 | 0 pack-years         | 30 to 45 pack-years           | 0.756122 | 0.439987 |
| nasopharyngeal_cancer | 346030 | 0 | 0 pack-years         | 60 to 90 pack-years           | 1.589235 | 1.025614 |
| nasopharyngeal_cancer | 346030 | 0 | 0 pack-years         | 31 to 59 pack-years           | 1.252763 | 0.575802 |
| nasopharyngeal_cancer | 346030 | 0 | 0 pack-years         | 60 to 90 pack-years           | 1.131402 | 0.370309 |
| nasopharyngeal_cancer | 346030 | 0 | 0 pack-years         | 0 to 30 pack-years            | 0.262364 | 0.431711 |
| nasopharyngeal_cancer | 346030 | 0 | 0 pack-years         | 0 to 30 pack-years            | -0.10536 | 0.340136 |

|                       |        |   |              |                       |          |          |
|-----------------------|--------|---|--------------|-----------------------|----------|----------|
| nasopharyngeal_cancer | 346030 | 0 | 0 pack-years | 31 to 59 pack-years   | 0.587787 | 0.354308 |
| nasopharyngeal_cancer | 346032 | 0 | 0 pack-years | 60 to 90 pack-years   | 1.458615 | 0.646654 |
| nasopharyngeal_cancer | 346032 | 0 | 0 pack-years | 1 to 4 pack-years     | 0.641854 | 0.416219 |
| nasopharyngeal_cancer | 346032 | 0 | 0 pack-years | 35 to 59 pack-years   | 1.098612 | 0.467687 |
| nasopharyngeal_cancer | 346040 | 0 | 0 pack-years | 30 to 44 pack-years   | 0.916291 | 0.377551 |
| nasopharyngeal_cancer | 346040 | 0 | 0 pack-years | 45 to 67.5 pack-years | 1.360977 | 0.379383 |
| nasopharyngeal_cancer | 346040 | 0 | 0 pack-years | 0 to 14 pack-years    | 0.262364 | 0.353218 |
| nasopharyngeal_cancer | 346040 | 0 | 0 pack-years | 15 to 29 pack-years   | 0.587787 | 0.354308 |
| nasopharyngeal_cancer | 346047 | 0 | 0 pack-years | 0 to 19 pack-years    | 0.262364 | 0.235479 |
| nasopharyngeal_cancer | 346047 | 0 | 0 pack-years | 20 to 30 pack-years   | 0.405465 | 0.255102 |
| nasopharyngeal_cancer | 346049 | 0 | 0 pack-years | 20 to 39 pack-years   | -0.07257 | 1.091727 |
| nasopharyngeal_cancer | 346049 | 0 | 0 pack-years | 0 to 19 pack-years    | 0.182322 | 0.142432 |
| nasopharyngeal_cancer | 346049 | 0 | 0 pack-years | 20 to 39 pack-years   | 0.277632 | 0.16427  |
| nasopharyngeal_cancer | 346049 | 0 | 0 pack-years | 0 to 19 pack-years    | 0.29267  | 0.394076 |
| nasopharyngeal_cancer | 346049 | 0 | 0 pack-years | 40 to 60 pack-years   | 0.48858  | 0.241017 |
| nasopharyngeal_cancer | 346049 | 1 | 0 pack-years | 40 to 60 pack-years   | 0.770108 | 4.494992 |
| nasopharyngeal_cancer | 346056 | 1 | 0 pack-years | 30 to 45 pack-years   | 2.667228 | 0.246776 |
| nasopharyngeal_cancer | 346056 | 0 | 0 pack-years | 0 to 14 pack-years    | 0.262364 | 0.133438 |
| nasopharyngeal_cancer | 346056 | 1 | 0 pack-years | 15 to 30 pack-years   | 2.38968  | 0.234759 |
| nasopharyngeal_cancer | 346071 | 0 | 0 pack-years | 1 to 13 pack-years    | 0.494696 | 0.195993 |
| nasopharyngeal_cancer | 346071 | 0 | 0 pack-years | 14 to 21 pack-years   | 0.57098  | 0.196011 |
| nasopharyngeal_cancer | 373803 | 0 | 0 pack-years | 10 to 19 pack-years   | 0.122218 | 0.112877 |
| nasopharyngeal_cancer | 373803 | 0 | 0 pack-years | 0 to 9 pack-years     | 0.165514 | 0.099447 |
| nasopharyngeal_cancer | 373803 | 0 | 0 pack-years | 20 to 29 pack-years   | 0.207014 | 0.109922 |
| nasopharyngeal_cancer | 373803 | 0 | 0 pack-years | 30 to 45 pack-years   | 0.438255 | 0.105332 |
| nasopharyngeal_cancer | 502223 | 0 | 0 pack-years | 16 to 25 pack-years   | 0.223144 | 0.136612 |
| nasopharyngeal_cancer | 502223 | 0 | 0 pack-years | 0 to 15 pack-years    | 0.00995  | 0.139424 |
| nasopharyngeal_cancer | 502223 | 0 | 0 pack-years | 25 to 37.5 pack-years | 0.683097 | 0.116035 |
| other_pharynx_cancer  | 343375 | 0 | 0 pack-years | 1 to 20 pack-years    | 1.686399 | 0.535456 |
| other_pharynx_cancer  | 343375 | 0 | 0 pack-years | 21 to 40 pack-years   | 1.740466 | 0.557515 |
| other_pharynx_cancer  | 343375 | 0 | 0 pack-years | 41 to 61.5 pack-years | 2.014903 | 0.583107 |
| other_pharynx_cancer  | 343434 | 0 | 0 pack-years | 51 to 76.5 pack-years | 1.029619 | 0.637755 |
| other_pharynx_cancer  | 343434 | 0 | 0 pack-years | 1 to 25 pack-years    | 0.641854 | 0.980129 |
| other_pharynx_cancer  | 343434 | 0 | 0 pack-years | 25 to 50 pack-years   | 1.410987 | 1.636386 |
| other_pharynx_cancer  | 343434 | 0 | 0 pack-years | 1 to 25 pack-years    | 0        | 0.688776 |
| other_pharynx_cancer  | 343434 | 1 | 0 pack-years | 51 to 76.5 pack-years | -0.10536 | 6.972789 |
| other_pharynx_cancer  | 343434 | 0 | 0 pack-years | 25 to 50 pack-years   | 0.336472 | 0.69242  |
| other_pharynx_cancer  | 343450 | 0 | 0 pack-years | 1 to 28 pack-years    | 1.252763 | 0.386297 |
| other_pharynx_cancer  | 343450 | 0 | 0 pack-years | 48 to 76 pack-years   | 1.902108 | 0.373134 |
| other_pharynx_cancer  | 343450 | 1 | 0 pack-years | 29 to 47 pack-years   | 2.186051 | 0.375487 |
| other_pharynx_cancer  | 343450 | 1 | 0 pack-years | 77 to 100 pack-years  | 2.587764 | 0.374022 |
| other_pharynx_cancer  | 359128 | 0 | 0 pack-years | 0 to 19 pack-years    | 2.491551 | 2.480487 |
| other_pharynx_cancer  | 359128 | 0 | 0 pack-years | 60 to 90 pack-years   | 3.040706 | 2.302625 |

|                      |        |   |              |                           |          |          |
|----------------------|--------|---|--------------|---------------------------|----------|----------|
| other_pharynx_cancer | 359128 | 0 | 0 pack-years | 40 to 59 pack-years       | 2.695303 | 2.130731 |
| other_pharynx_cancer | 359128 | 0 | 0 pack-years | 20 to 39 pack-years       | 1.86408  | 2.202183 |
| other_pharynx_cancer | 359128 | 0 | 0 pack-years | 60 to 90 pack-years       | 1.373716 | 1.11147  |
| other_pharynx_cancer | 359128 | 0 | 0 pack-years | 20 to 39 pack-years       | 1.350667 | 0.7012   |
| other_pharynx_cancer | 359128 | 0 | 0 pack-years | 40 to 59 pack-years       | 0.672944 | 0.978759 |
| other_pharynx_cancer | 359128 | 0 | 0 pack-years | 0 to 19 pack-years        | -0.24846 | 2.282836 |
| other_pharynx_cancer | 364113 | 0 | 0 pack-years | 1 to 29 pack-years        | 0.908259 | 0.102864 |
| other_pharynx_cancer | 364113 | 0 | 0 pack-years | 30 to 39 pack-years       | 1.20896  | 0.144685 |
| other_pharynx_cancer | 364113 | 0 | 0 pack-years | 40 to 49 pack-years       | 1.366092 | 0.175708 |
| other_pharynx_cancer | 364113 | 0 | 0 pack-years | 60 to 90 pack-years       | 1.408545 | 0.243251 |
| other_pharynx_cancer | 364113 | 0 | 0 pack-years | 50 to 59 pack-years       | 1.432701 | 0.213092 |
| other_pharynx_cancer | 439809 | 0 | 0 pack-years | 1 to 19 pack-years        | 1.269761 | 0.33968  |
| other_pharynx_cancer | 439809 | 0 | 0 pack-years | 20 to 39 pack-years       | 1.439835 | 0.302272 |
| other_pharynx_cancer | 439809 | 0 | 0 pack-years | 40 to 60 pack-years       | 1.583094 | 0.298715 |
| other_pharynx_cancer | 439813 | 0 | 0 pack-years | 0.05 to 40 pack-years     | 0.707543 | 0.489473 |
| other_pharynx_cancer | 439813 | 0 | 0 pack-years | 40 to 60 pack-years       | 1.934849 | 0.526249 |
| other_pharynx_cancer | 502194 | 0 | 0 pack-years | 1 to 10 pack-years        | 0.019803 | 0.832126 |
| other_pharynx_cancer | 502194 | 0 | 0 pack-years | 10 to 19 pack-years       | 0.314811 | 0.350858 |
| other_pharynx_cancer | 502194 | 1 | 0 pack-years | 20 to 30 pack-years       | 0.524729 | 0.251447 |
| pancreatic_cancer    | 164536 | 0 | 0 pack-years | 20 to 39 pack-years       | 0.425268 | 0.590236 |
| pancreatic_cancer    | 164536 | 0 | 0 pack-years | 0 to 19 pack-years        | 0.832909 | 0.50244  |
| pancreatic_cancer    | 164536 | 0 | 0 pack-years | 0 to 19 pack-years        | 0.97456  | 0.470735 |
| pancreatic_cancer    | 164536 | 1 | 0 pack-years | 40 to 60 pack-years       | 1.398717 | 0.456664 |
| pancreatic_cancer    | 164536 | 1 | 0 pack-years | 20 to 39 pack-years       | 1.570697 | 0.419513 |
| pancreatic_cancer    | 164536 | 1 | 0 pack-years | 40 to 60 pack-years       | 1.931521 | 0.85108  |
| pancreatic_cancer    | 164547 | 0 | 0 pack-years | 0 to 29 pack-years        | 0.405465 | 0.323129 |
| pancreatic_cancer    | 343580 | 0 | 0 pack-years | 50.05 to 75 pack-years    | 0.587787 | 0.390683 |
| pancreatic_cancer    | 343580 | 0 | 0 pack-years | 75.05 to 112.5 pack-years | 0.641854 | 0.386823 |
| pancreatic_cancer    | 343580 | 0 | 0 pack-years | 0.05 to 25 pack-years     | 0.182322 | 0.420576 |
| pancreatic_cancer    | 343580 | 0 | 0 pack-years | 25.05 to 50 pack-years    | 0.530628 | 0.34646  |
| pancreatic_cancer    | 346137 | 1 | 0 pack-years | 40 to 60 pack-years       | -0.56212 | 0.313283 |
| pancreatic_cancer    | 346137 | 0 | 0 pack-years | 0 to 19 pack-years        | 0        | 0.336735 |
| pancreatic_cancer    | 346137 | 0 | 0 pack-years | 20 to 39 pack-years       | 0.139762 | 0.301686 |
| pancreatic_cancer    | 346137 | 0 | 0 pack-years | 0 to 19 pack-years        | 0.357674 | 0.695733 |
| pancreatic_cancer    | 346137 | 1 | 0 pack-years | 40 to 60 pack-years       | 0.444686 | 1.439037 |
| pancreatic_cancer    | 346137 | 0 | 0 pack-years | 20 to 39 pack-years       | 0.875469 | 0.687713 |
| pancreatic_cancer    | 346826 | 0 | 0 pack-years | 11 to 25 pack-years       | 0.993252 | 0.349584 |
| pancreatic_cancer    | 346826 | 0 | 0 pack-years | 1 to 10 pack-years        | 0.262364 | 1.000785 |
| pancreatic_cancer    | 346826 | 0 | 0 pack-years | 51 to 76.5 pack-years     | 0.741937 | 0.315841 |
| pancreatic_cancer    | 346826 | 1 | 0 pack-years | 26 to 50 pack-years       | 1.029619 | 0.23688  |
| pancreatic_cancer    | 346828 | 0 | 0 pack-years | 20 to 30 pack-years       | 0.652325 | 0.289647 |
| pancreatic_cancer    | 346828 | 0 | 0 pack-years | 0 to 19 pack-years        | 0.131028 | 0.429646 |
| pancreatic_cancer    | 346832 | 1 | 0 pack-years | 1 to 8.5 pack-years       | -1.60944 | 6.505102 |

|                   |        |   |              |                           |          |          |
|-------------------|--------|---|--------------|---------------------------|----------|----------|
| pancreatic_cancer | 346832 | 0 | 0 pack-years | 1 to 14 pack-years        | 0.09531  | 0.672542 |
| pancreatic_cancer | 346832 | 0 | 0 pack-years | 15 to 22.5 pack-years     | 0.832909 | 0.343833 |
| pancreatic_cancer | 346832 | 0 | 0 pack-years | 9.5 to 14.25 pack-years   | 1.029619 | 0.446429 |
| pancreatic_cancer | 346870 | 1 | 0 pack-years | 0 to 14 pack-years        | -0.22314 | 0.28699  |
| pancreatic_cancer | 346870 | 0 | 0 pack-years | 0 to 9 pack-years         | 0        | 0.382653 |
| pancreatic_cancer | 346870 | 0 | 0 pack-years | 15 to 34 pack-years       | 0.405465 | 0.204082 |
| pancreatic_cancer | 346870 | 0 | 0 pack-years | 10 to 15 pack-years       | 0.693147 | 0.357143 |
| pancreatic_cancer | 346870 | 0 | 0 pack-years | 35 to 52.5 pack-years     | 0.875469 | 0.212585 |
| pancreatic_cancer | 346876 | 0 | 0 pack-years | 60 to 90 pack-years       | 0.530628 | 0.495198 |
| pancreatic_cancer | 346876 | 0 | 0 pack-years | 0 to 19 pack-years        | 0.693147 | 0.447704 |
| pancreatic_cancer | 346876 | 0 | 0 pack-years | 40 to 59 pack-years       | 0.336472 | 0.340743 |
| pancreatic_cancer | 346876 | 0 | 0 pack-years | 20 to 39 pack-years       | 0.530628 | 0.322629 |
| pancreatic_cancer | 347176 | 0 | 0 pack-years | 0 to 19 pack-years        | 0.262364 | 0.156986 |
| pancreatic_cancer | 347176 | 0 | 0 pack-years | 20 to 44 pack-years       | 0.641854 | 0.161117 |
| pancreatic_cancer | 347176 | 0 | 0 pack-years | 45 to 67.5 pack-years     | 0.788457 | 0.173933 |
| pancreatic_cancer | 359135 | 0 | 0 pack-years | 20 to 39 pack-years       | 0.615186 | 0.390237 |
| pancreatic_cancer | 359135 | 0 | 0 pack-years | 0 to 19 pack-years        | 0.131028 | 0.304332 |
| pancreatic_cancer | 359135 | 0 | 0 pack-years | 20 to 39 pack-years       | 0.398776 | 0.186618 |
| pancreatic_cancer | 359135 | 0 | 0 pack-years | 40 to 60 pack-years       | 0.582216 | 0.171018 |
| pancreatic_cancer | 359135 | 0 | 0 pack-years | 0 to 19 pack-years        | 0.783902 | 0.26908  |
| pancreatic_cancer | 359138 | 0 | 0 pack-years | 15 to 24 pack-years       | 0.553885 | 0.250704 |
| pancreatic_cancer | 359139 | 0 | 0 pack-years | 25 to 49 pack-years       | 0.891998 | 0.270785 |
| pancreatic_cancer | 359139 | 0 | 0 pack-years | 50 to 75 pack-years       | 0.955511 | 0.275706 |
| pancreatic_cancer | 359139 | 0 | 0 pack-years | 0 to 24 pack-years        | 0.553885 | 0.324009 |
| pancreatic_cancer | 359140 | 0 | 0 pack-years | 10 to 19 pack-years       | 0.300105 | 0.472411 |
| pancreatic_cancer | 502128 | 0 | 0 pack-years | 1 to 49.5 pack-years      | 0.86289  | 0.435114 |
| pancreatic_cancer | 502128 | 1 | 0 pack-years | 49.51 to 74.25 pack-years | -0.12783 | 0.534552 |
| pancreatic_cancer | 502130 | 0 | 0 pack-years | 0 to 10 pack-years        | 0.329304 | 0.343569 |
| pancreatic_cancer | 502130 | 0 | 0 pack-years | 10 to 19 pack-years       | 0.405465 | 0.250904 |
| pancreatic_cancer | 502130 | 0 | 0 pack-years | 20 to 29 pack-years       | 0.444686 | 0.257568 |
| pancreatic_cancer | 502130 | 0 | 0 pack-years | 30 to 45 pack-years       | 0.65752  | 0.205769 |
| pancreatic_cancer | 502188 | 0 | 0 pack-years | 14 to 32 pack-years       | 0.451076 | 0.108079 |
| pancreatic_cancer | 502188 | 1 | 0 pack-years | 1 to 14 pack-years        | -0.10536 | 0.11498  |
| pancreatic_cancer | 502188 | 0 | 0 pack-years | 32 to 48 pack-years       | 0.405465 | 0.106925 |
| pancreatic_cancer | 502220 | 0 | 0 pack-years | 0 to 20 pack-years        | 0.357674 | 0.095451 |
| pancreatic_cancer | 502220 | 0 | 0 pack-years | 20 to 30 pack-years       | 0.565314 | 0.095148 |
| pancreatic_cancer | 502474 | 0 | 0 pack-years | 41 to 61.5 pack-years     | 0.837248 | 0.457081 |
| pancreatic_cancer | 502474 | 0 | 0 pack-years | 21 to 40 pack-years       | 0.955511 | 0.200474 |
| pancreatic_cancer | 502474 | 0 | 0 pack-years | 21 to 40 pack-years       | 0.887891 | 0.245708 |
| pancreatic_cancer | 502474 | 0 | 0 pack-years | 41 to 61.5 pack-years     | 0.904218 | 0.451178 |
| pancreatic_cancer | 502474 | 0 | 0 pack-years | 1 to 20 pack-years        | 0.48858  | 0.173503 |
| pancreatic_cancer | 502474 | 0 | 0 pack-years | 1 to 20 pack-years        | 0.512824 | 0.15406  |
| pancreatic_cancer | 502474 | 0 | 0 pack-years | 21 to 40 pack-years       | 0.858662 | 0.227938 |



|                   |        |   |                      |                                 |          |          |
|-------------------|--------|---|----------------------|---------------------------------|----------|----------|
| pancreatic_cancer | 502474 | 0 | 0 pack-years         | 41 to 61.5 pack-years           | 1.043804 | 0.457081 |
| pancreatic_cancer | 502474 | 0 | 0 pack-years         | 1 to 20 pack-years              | 0.620576 | 0.156482 |
| pancreatic_cancer | 502474 | 0 | 0 pack-years         | 21 to 40 pack-years             | 0.932164 | 0.213736 |
| pancreatic_cancer | 502474 | 0 | 0 pack-years         | 41 to 61.5 pack-years           | 1.095273 | 0.452548 |
| pancreatic_cancer | 502474 | 0 | 0 pack-years         | 1 to 20 pack-years              | 0.512824 | 0.163849 |
| pancreatic_cancer | 502474 | 0 | 0 pack-years         | 21 to 40 pack-years             | 0.908259 | 0.221146 |
| pancreatic_cancer | 502474 | 0 | 0 pack-years         | 21 to 40 pack-years             | 0.947789 | 0.193557 |
| pancreatic_cancer | 502474 | 0 | 0 pack-years         | 1 to 20 pack-years              | 0.457425 | 0.185935 |
| pancreatic_cancer | 502474 | 0 | 0 pack-years         | 41 to 61.5 pack-years           | 0.828552 | 0.45481  |
| pancreatic_cancer | 502474 | 0 | 0 pack-years         | 1 to 20 pack-years              | 0.620576 | 0.144833 |
| pancreatic_cancer | 502474 | 0 | 0 pack-years         | 41 to 61.5 pack-years           | 0.587787 | 0.116758 |
| pancreatic_cancer | 502474 | 0 | 0 pack-years         | 21 to 40 pack-years             | 0.500775 | 0.12234  |
| pancreatic_cancer | 502474 | 0 | 0 pack-years         | 1 to 20 pack-years              | 0.350657 | 0.138677 |
| pancreatic_cancer | 502474 | 0 | 0 pack-years         | 21 to 40 pack-years             | 0.463734 | 0.103435 |
| pancreatic_cancer | 502474 | 0 | 0 pack-years         | 41 to 61.5 pack-years           | 0.609766 | 0.107399 |
| pancreatic_cancer | 502474 | 0 | 0 pack-years         | 1 to 20 pack-years              | 0.329304 | 0.139298 |
| pancreatic_cancer | 502474 | 0 | 0 pack-years         | 21 to 40 pack-years             | 0.444686 | 0.104104 |
| pancreatic_cancer | 502474 | 0 | 0 pack-years         | 41 to 61.5 pack-years           | 0.587787 | 0.109194 |
| pancreatic_cancer | 502474 | 0 | 0 pack-years         | 1 to 20 pack-years              | 0.336472 | 0.153733 |
| pancreatic_cancer | 502474 | 0 | 0 pack-years         | 21 to 40 pack-years             | 0.48858  | 0.11299  |
| pancreatic_cancer | 502474 | 0 | 0 pack-years         | 41 to 61.5 pack-years           | 0.615186 | 0.119682 |
| pancreatic_cancer | 502474 | 0 | 0 pack-years         | 1 to 20 pack-years              | 0.307485 | 0.151624 |
| pancreatic_cancer | 502474 | 0 | 0 pack-years         | 21 to 40 pack-years             | 0.470004 | 0.110585 |
| pancreatic_cancer | 502474 | 0 | 0 pack-years         | 1 to 20 pack-years              | 0.300105 | 0.154162 |
| pancreatic_cancer | 502474 | 0 | 0 pack-years         | 21 to 40 pack-years             | 0.451076 | 0.112712 |
| pancreatic_cancer | 502474 | 0 | 0 pack-years         | 41 to 61.5 pack-years           | 0.582216 | 0.120351 |
| pancreatic_cancer | 502474 | 0 | 0 pack-years         | 1 to 20 pack-years              | 0.300105 | 0.166081 |
| pancreatic_cancer | 502474 | 0 | 0 pack-years         | 41 to 61.5 pack-years           | 0.615186 | 0.153439 |
| pancreatic_cancer | 502474 | 0 | 0 pack-years         | 41 to 61.5 pack-years           | 1.054312 | 0.457807 |
| parkinson         | 173863 | 0 | 0 cigarettes per day | 15 to 24 cigarettes per day     | -1.20397 | 1.862245 |
| parkinson         | 173863 | 0 | 0 cigarettes per day | 25 to 37.5 cigarettes per day   | -0.10536 | 0.620748 |
| parkinson         | 173863 | 0 | 0 cigarettes per day | 1 to 14 cigarettes per day      | 0.09531  | 0.507885 |
| parkinson         | 355955 | 1 | 0 cigarettes per day | 1 to 14 cigarettes per day      | 0.587787 | 0.310374 |
| parkinson         | 359151 | 0 | 0 cigarettes per day | 21 to 31.5 cigarettes per day   | -0.47804 | 0.50609  |
| parkinson         | 359151 | 0 | 0 cigarettes per day | 1 to 20 cigarettes per day      | -0.43078 | 0.298273 |
| parkinson         | 359152 | 0 | 0 cigarettes per day | 1 to 14 cigarettes per day      | -0.69315 | 0.383693 |
| parkinson         | 359152 | 0 | 0 cigarettes per day | 15 to 22.5 cigarettes per day   | -1.20397 | 0.280258 |
| parkinson         | 359154 | 1 | 0 cigarettes per day | 12.7 to 19.2 cigarettes per day | -1.07881 | 0.210084 |
| parkinson         | 359154 | 1 | 0 cigarettes per day | 7 to 12.7 cigarettes per day    | -0.99425 | 0.199945 |
| parkinson         | 359154 | 0 | 0 cigarettes per day | 19.2 to 60 cigarettes per day   | -0.94161 | 0.196232 |
| parkinson         | 359154 | 0 | 0 cigarettes per day | 0 to 7 cigarettes per day       | -0.63488 | 0.182903 |
| parkinson         | 359157 | 0 | 0 cigarettes per day | 1 to 10 cigarettes per day      | -0.24846 | 0.30416  |
| parkinson         | 359157 | 0 | 0 cigarettes per day | 31 to 46.5 cigarettes per day   | -0.26136 | 0.72555  |

|           |        |   |                      |                               |          |          |
|-----------|--------|---|----------------------|-------------------------------|----------|----------|
| parkinson | 359157 | 0 | 0 cigarettes per day | 11 to 20 cigarettes per day   | -0.3285  | 0.276361 |
| parkinson | 359157 | 0 | 0 cigarettes per day | 21 to 30 cigarettes per day   | -0.40048 | 0.464514 |
| parkinson | 359157 | 0 | 0 cigarettes per day | 21 to 30 cigarettes per day   | -0.51919 | 0.287258 |
| parkinson | 359157 | 0 | 0 cigarettes per day | 11 to 20 cigarettes per day   | -0.73397 | 0.244473 |
| parkinson | 359157 | 0 | 0 cigarettes per day | 1 to 10 cigarettes per day    | -0.79851 | 0.328798 |
| parkinson | 359157 | 0 | 0 cigarettes per day | 31 to 46.5 cigarettes per day | -1.20397 | 0.527211 |
| parkinson | 359158 | 1 | 0 cigarettes per day | 21 to 31.5 cigarettes per day | 0.815365 | 0.237042 |
| parkinson | 359158 | 1 | 0 cigarettes per day | 0 to 19 cigarettes per day    | 1.695616 | 0.268208 |
| parkinson | 359159 | 0 | 0 cigarettes per day | 30 to 45 cigarettes per day   | -1.96611 | 1.767493 |
| parkinson | 359159 | 0 | 0 cigarettes per day | 10 to 19 cigarettes per day   | -0.44629 | 0.342793 |
| parkinson | 359159 | 0 | 0 cigarettes per day | 30 to 45 cigarettes per day   | -0.41552 | 0.200989 |
| parkinson | 359159 | 0 | 0 cigarettes per day | 20 to 29 cigarettes per day   | -0.35667 | 0.353499 |
| parkinson | 359159 | 0 | 0 cigarettes per day | 20 to 29 cigarettes per day   | -0.27444 | 0.1779   |
| parkinson | 359159 | 0 | 0 cigarettes per day | 10 to 19 cigarettes per day   | -0.13926 | 0.196458 |
| parkinson | 359159 | 0 | 0 cigarettes per day | 0 to 9 cigarettes per day     | -0.01005 | 0.21645  |
| parkinson | 359159 | 0 | 0 cigarettes per day | 0 to 9 cigarettes per day     | 0.113329 | 0.23688  |
| parkinson | 359160 | 0 | 0 cigarettes per day | 0 to 19 cigarettes per day    | -0.38566 | 0.427671 |
| parkinson | 359160 | 0 | 0 cigarettes per day | 21 to 31.5 cigarettes per day | -1.10866 | 0.347866 |
| parkinson | 359161 | 0 | 0 cigarettes per day | 21 to 31.5 cigarettes per day | -2.20727 | 1.7718   |
| parkinson | 359161 | 0 | 0 cigarettes per day | 0 to 19 cigarettes per day    | -0.3285  | 0.279904 |
| parkinson | 359162 | 0 | 0 cigarettes per day | 21 to 31.5 cigarettes per day | -1.83258 | 0.57398  |
| parkinson | 359162 | 0 | 0 cigarettes per day | 11 to 20 cigarettes per day   | -0.79851 | 1.547619 |
| parkinson | 359162 | 0 | 0 cigarettes per day | 11 to 20 cigarettes per day   | -0.52763 | 0.229159 |
| parkinson | 359162 | 0 | 0 cigarettes per day | 1 to 10 cigarettes per day    | -0.04082 | 0.236501 |
| parkinson | 359162 | 1 | 0 cigarettes per day | 21 to 31.5 cigarettes per day | 0.631272 | 0.419561 |
| parkinson | 359162 | 1 | 0 cigarettes per day | 1 to 10 cigarettes per day    | 0.920283 | 0.2612   |
| parkinson | 359164 | 0 | 0 cigarettes per day | 11 to 20 cigarettes per day   | -0.35667 | 0.335277 |
| parkinson | 359164 | 0 | 0 cigarettes per day | 1 to 10 cigarettes per day    | -0.35667 | 0.517493 |
| parkinson | 359164 | 0 | 0 cigarettes per day | 21 to 31.5 cigarettes per day | -1.04982 | 0.880466 |
| parkinson | 359307 | 0 | 0 cigarettes per day | 20 to 39 cigarettes per day   | -0.67334 | 0.370148 |
| parkinson | 359307 | 0 | 0 cigarettes per day | 41 to 61.5 cigarettes per day | -0.34249 | 0.467088 |
| parkinson | 359307 | 0 | 0 cigarettes per day | 0 to 19 cigarettes per day    | -0.26136 | 0.404188 |
| parkinson | 502009 | 0 | 0 cigarettes per day | 12 to 18 cigarettes per day   | -0.61619 | 0.318323 |
| parkinson | 502009 | 0 | 0 cigarettes per day | 1 to 12 cigarettes per day    | -0.51083 | 0.450186 |
| parkinson | 502009 | 0 | 0 cigarettes per day | 1 to 12 cigarettes per day    | -0.91629 | 0.669894 |
| parkinson | 502009 | 0 | 0 cigarettes per day | 12 to 18 cigarettes per day   | -0.38566 | 0.203701 |
| parkinson | 502009 | 0 | 0 cigarettes per day | 1 to 12 cigarettes per day    | -0.09431 | 0.192527 |
| parkinson | 502009 | 0 | 0 cigarettes per day | 12 to 18 cigarettes per day   | -0.94161 | 0.366732 |
| parkinson | 502009 | 0 | 0 cigarettes per day | 1 to 12 cigarettes per day    | -0.23572 | 0.167712 |
| parkinson | 502009 | 0 | 0 cigarettes per day | 12 to 18 cigarettes per day   | -0.47804 | 0.405045 |
| parkinson | 502009 | 0 | 0 cigarettes per day | 1 to 12 cigarettes per day    | 0.076961 | 0.327761 |
| parkinson | 502009 | 0 | 0 cigarettes per day | 12 to 18 cigarettes per day   | -0.63488 | 0.322172 |
| parkinson | 502009 | 0 | 0 cigarettes per day | 12 to 18 cigarettes per day   | -0.57982 | 0.151292 |

|                           |        |   |                      |                               |          |          |
|---------------------------|--------|---|----------------------|-------------------------------|----------|----------|
| parkinson                 | 502009 | 0 | 0 cigarettes per day | 1 to 12 cigarettes per day    | -0.18633 | 0.195885 |
| parkinson                 | 502009 | 0 | 0 cigarettes per day | 1 to 12 cigarettes per day    | -0.99425 | 0.4599   |
| parkinson                 | 502009 | 0 | 0 cigarettes per day | 1 to 12 cigarettes per day    | -0.03046 | 0.307617 |
| parkinson                 | 502009 | 0 | 0 cigarettes per day | 12 to 18 cigarettes per day   | -0.52763 | 0.381661 |
| peptic_ulcer              | 262563 | 0 | 0 cigarettes per day | 0 to 19 cigarettes per day    | 0.470004 | 0.255102 |
| peptic_ulcer              | 328259 | 0 | 0 cigarettes per day | 1 to 7 cigarettes per day     | 0.587787 | 0.365646 |
| peptic_ulcer              | 328259 | 0 | 0 cigarettes per day | 8 to 15 cigarettes per day    | 0.683097 | 0.407133 |
| peptic_ulcer              | 328259 | 0 | 0 cigarettes per day | 8 to 15 cigarettes per day    | 0.693147 | 0.628827 |
| peptic_ulcer              | 328259 | 1 | 0 cigarettes per day | 16 to 25 cigarettes per day   | 0.81978  | 1.853142 |
| peptic_ulcer              | 328259 | 0 | 0 cigarettes per day | 1 to 7 cigarettes per day     | 0.871293 | 0.376783 |
| peptic_ulcer              | 328259 | 0 | 0 cigarettes per day | 16 to 25 cigarettes per day   | 1.163151 | 0.460778 |
| peptic_ulcer              | 328259 | 0 | 0 cigarettes per day | 26 to 39 cigarettes per day   | 1.291984 | 1.033724 |
| peptic_ulcer              | 338384 | 0 | 0 cigarettes per day | 15 to 20 cigarettes per day   | 1.609438 | 0.642857 |
| peptic_ulcer              | 338384 | 0 | 0 cigarettes per day | 21 to 31.5 cigarettes per day | 0.916291 | 0.612245 |
| peptic_ulcer              | 338384 | 0 | 0 cigarettes per day | 15 to 20 cigarettes per day   | 1.064711 | 0.492611 |
| peptic_ulcer              | 338384 | 0 | 0 cigarettes per day | 1 to 9 cigarettes per day     | 0.405465 | 0.493197 |
| peptic_ulcer              | 338384 | 0 | 0 cigarettes per day | 10 to 14 cigarettes per day   | 0.262364 | 0.510204 |
| peptic_ulcer              | 338384 | 0 | 0 cigarettes per day | 15 to 20 cigarettes per day   | 0.693147 | 0.395408 |
| peptic_ulcer              | 349377 | 0 | 0 cigarettes per day | 0 to 15 cigarettes per day    | 0.215111 | 0.357966 |
| peptic_ulcer              | 349377 | 0 | 0 cigarettes per day | 16 to 24 cigarettes per day   | 0.385262 | 0.452936 |
| peptic_ulcer              | 349377 | 1 | 0 cigarettes per day | 0 to 15 cigarettes per day    | 1.348073 | 0.277631 |
| peptic_ulcer              | 349377 | 1 | 0 cigarettes per day | 16 to 24 cigarettes per day   | 1.467874 | 0.298599 |
| peptic_ulcer              | 349381 | 0 | 0 cigarettes per day | 1 to 14 cigarettes per day    | 0.029559 | 0.616703 |
| peptic_ulcer              | 349381 | 0 | 0 cigarettes per day | 14 to 24 cigarettes per day   | 0.029559 | 0.537448 |
| peptic_ulcer              | 349381 | 0 | 0 cigarettes per day | 25 to 37.5 cigarettes per day | 0.24686  | 0.49426  |
| peptic_ulcer              | 349542 | 0 | 0 cigarettes per day | 1 to 9 cigarettes per day     | 0.559616 | 0.370262 |
| peptic_ulcer              | 349542 | 0 | 0 cigarettes per day | 10 to 20 cigarettes per day   | 0.703098 | 0.239947 |
| peptic_ulcer              | 349542 | 0 | 0 cigarettes per day | 21 to 31.5 cigarettes per day | 0.832909 | 0.353815 |
| peptic_ulcer              | 359166 | 0 | 0 cigarettes per day | 0 to 14 cigarettes per day    | 0.254642 | 0.395507 |
| peptic_ulcer              | 359166 | 0 | 0 cigarettes per day | 15 to 22.5 cigarettes per day | 0.732368 | 0.381427 |
| peripheral_artery_disease | 350659 | 0 | 0 cigarettes per day | 0 to 14 cigarettes per day    | 2.189416 | 0.310522 |
| peripheral_artery_disease | 350659 | 1 | 0 cigarettes per day | 15 to 22.5 cigarettes per day | 2.830268 | 0.239299 |
| peripheral_artery_disease | 359221 | 0 | 0 cigarettes per day | 1 to 20 cigarettes per day    | 1.205971 | 0.306275 |
| peripheral_artery_disease | 359221 | 0 | 0 cigarettes per day | 19 to 28.5 cigarettes per day | 1.534714 | 0.294687 |
| peripheral_artery_disease | 359223 | 0 | 0 cigarettes per day | 0 to 24 cigarettes per day    | 1.054312 | 0.329766 |
| peripheral_artery_disease | 359223 | 0 | 0 cigarettes per day | 25 to 37.5 cigarettes per day | 2.53449  | 0.485928 |
| peripheral_artery_disease | 369290 | 0 | 0 cigarettes per day | 1 to 20 cigarettes per day    | 2.116256 | 1.05533  |
| peripheral_artery_disease | 369290 | 0 | 0 cigarettes per day | 21 to 40 cigarettes per day   | 2.351375 | 1.148031 |
| peripheral_artery_disease | 369290 | 0 | 0 cigarettes per day | 41 to 61.5 cigarettes per day | 2.70805  | 1.605736 |
| peripheral_artery_disease | 462792 | 0 | 0 cigarettes per day | 1 to 14 cigarettes per day    | 1.249902 | 0.11089  |
| peripheral_artery_disease | 462792 | 0 | 0 cigarettes per day | 15 to 24 cigarettes per day   | 1.773256 | 0.089642 |
| peripheral_artery_disease | 462792 | 0 | 0 cigarettes per day | 25 to 37.5 cigarettes per day | 1.98238  | 0.102145 |
| peripheral_artery_disease | 501896 | 0 | 0 cigarettes per day | 1 to 19 cigarettes per day    | 0.982078 | 0.157216 |

|                           |        |   |                      |                               |          |          |
|---------------------------|--------|---|----------------------|-------------------------------|----------|----------|
| peripheral_artery_disease | 501896 | 1 | 0 cigarettes per day | 20 to 30 cigarettes per day   | 1.311032 | 0.1312   |
| prostate_cancer           | 165518 | 0 | 0 cigarettes per day | 0 to 30 cigarettes per day    | 0.262364 | 0.353218 |
| prostate_cancer           | 165518 | 0 | 0 cigarettes per day | 31 to 55 cigarettes per day   | 0.262364 | 0.392465 |
| prostate_cancer           | 165518 | 0 | 0 cigarettes per day | 56 to 84 cigarettes per day   | 0.693147 | 0.344388 |
| prostate_cancer           | 165571 | 0 | 0 cigarettes per day | 1 to 20 cigarettes per day    | 0.262364 | 0.392971 |
| prostate_cancer           | 165571 | 0 | 0 cigarettes per day | 20 to 30 cigarettes per day   | 0.470004 | 0.438176 |
| prostate_cancer           | 165618 | 0 | 0 cigarettes per day | 0 to 10 cigarettes per day    | -0.69315 | 0.33145  |
| prostate_cancer           | 165618 | 0 | 0 cigarettes per day | 11 to 16.5 cigarettes per day | -0.51083 | 0.353647 |
| prostate_cancer           | 328210 | 0 | 0 cigarettes per day | 0 to 20 cigarettes per day    | 0.322083 | 0.201635 |
| prostate_cancer           | 328210 | 0 | 0 cigarettes per day | 20 to 30 cigarettes per day   | -0.38566 | 0.332772 |
| prostate_cancer           | 328339 | 0 | 0 cigarettes per day | 0 to 19 cigarettes per day    | -0.34249 | 0.643145 |
| prostate_cancer           | 328339 | 0 | 0 cigarettes per day | 60 to 90 cigarettes per day   | 0.277632 | 0.479283 |
| prostate_cancer           | 328339 | 0 | 0 cigarettes per day | 40 to 59 cigarettes per day   | 0.34359  | 0.28405  |
| prostate_cancer           | 328339 | 0 | 0 cigarettes per day | 20 to 39 cigarettes per day   | 0.457425 | 0.269633 |
| prostate_cancer           | 343354 | 0 | 0 cigarettes per day | 39 to 58.5 cigarettes per day | 0.41211  | 0.117228 |
| prostate_cancer           | 343354 | 0 | 0 cigarettes per day | 10 to 20 cigarettes per day   | 0.139762 | 0.048527 |
| prostate_cancer           | 343354 | 0 | 0 cigarettes per day | 21 to 39 cigarettes per day   | 0.207014 | 0.06018  |
| prostate_cancer           | 343354 | 0 | 0 cigarettes per day | 15 to 22.5 cigarettes per day | 0.165514 | 0.179878 |
| prostate_cancer           | 343354 | 0 | 0 cigarettes per day | 1 to 14 cigarettes per day    | 0.207014 | 0.195837 |
| prostate_cancer           | 343354 | 0 | 0 cigarettes per day | 1 to 9 cigarettes per day     | 0.10436  | 0.068744 |
| prostate_cancer           | 347383 | 0 | 0 cigarettes per day | 1 to 19 cigarettes per day    | 0.470004 | 0.361496 |
| prostate_cancer           | 347383 | 0 | 0 cigarettes per day | 20 to 29 cigarettes per day   | 0.530628 | 0.376507 |
| prostate_cancer           | 347383 | 0 | 0 cigarettes per day | 30 to 45 cigarettes per day   | 0.336472 | 0.611708 |
| prostate_cancer           | 347385 | 0 | 0 cigarettes per day | 0 to 20 cigarettes per day    | 0        | 0.250212 |
| prostate_cancer           | 347385 | 0 | 0 cigarettes per day | 20 to 30 cigarettes per day   | 0.641854 | 0.242112 |
| prostate_cancer           | 347435 | 0 | 0 cigarettes per day | 20 to 30 cigarettes per day   | 0.223144 | 0.11507  |
| prostate_cancer           | 347435 | 0 | 0 cigarettes per day | 20 to 20 cigarettes per day   | 0.322083 | 0.112547 |
| prostate_cancer           | 347435 | 0 | 0 cigarettes per day | 10 to 20 cigarettes per day   | 0.457425 | 0.127812 |
| prostate_cancer           | 347435 | 0 | 0 cigarettes per day | 0 to 10 cigarettes per day    | 0.285179 | 0.164576 |
| prostate_cancer           | 347448 | 0 | 0 cigarettes per day | 20 to 39 cigarettes per day   | -0.04082 | 0.103635 |
| prostate_cancer           | 347448 | 0 | 0 cigarettes per day | 40 to 60 cigarettes per day   | 0.131028 | 0.105174 |
| prostate_cancer           | 347448 | 0 | 0 cigarettes per day | 0.25 to 19 cigarettes per day | 0.182322 | 0.082908 |
| prostate_cancer           | 347451 | 0 | 0 cigarettes per day | 10 to 19 cigarettes per day   | -0.16252 | 0.200322 |
| prostate_cancer           | 347451 | 0 | 0 cigarettes per day | 20 to 30 cigarettes per day   | 0.457425 | 0.263432 |
| prostate_cancer           | 347451 | 0 | 0 cigarettes per day | 10 to 19 cigarettes per day   | 0.10436  | 0.236647 |
| prostate_cancer           | 347451 | 0 | 0 cigarettes per day | 20 to 30 cigarettes per day   | -0.05129 | 0.220229 |
| prostate_cancer           | 347451 | 0 | 0 cigarettes per day | 0 to 10 cigarettes per day    | 0.10436  | 0.257715 |
| prostate_cancer           | 347451 | 0 | 0 cigarettes per day | 0 to 10 cigarettes per day    | 0.113329 | 0.473908 |
| prostate_cancer           | 347451 | 0 | 0 cigarettes per day | 10 to 19 cigarettes per day   | -0.05129 | 0.17872  |
| prostate_cancer           | 347451 | 0 | 0 cigarettes per day | 0 to 10 cigarettes per day    | -0.65393 | 0.483321 |
| prostate_cancer           | 347451 | 0 | 0 cigarettes per day | 10 to 19 cigarettes per day   | 0.029559 | 0.278837 |
| prostate_cancer           | 347451 | 0 | 0 cigarettes per day | 20 to 30 cigarettes per day   | 0.00995  | 0.224964 |
| prostate_cancer           | 347451 | 0 | 0 cigarettes per day | 20 to 30 cigarettes per day   | 0.322083 | 0.311185 |

|                      |        |   |                      |                               |          |          |
|----------------------|--------|---|----------------------|-------------------------------|----------|----------|
| prostate_cancer      | 347451 | 0 | 0 cigarettes per day | 0 to 10 cigarettes per day    | 0.113329 | 0.334233 |
| prostate_cancer      | 347454 | 1 | 0 cigarettes per day | 0 to 20 cigarettes per day    | -0.09431 | 0.036708 |
| prostate_cancer      | 347454 | 1 | 0 cigarettes per day | 20 to 30 cigarettes per day   | -0.28768 | 0.047126 |
| prostate_cancer      | 347454 | 1 | 0 cigarettes per day | 0 to 20 cigarettes per day    | 0.582216 | 0.174807 |
| prostate_cancer      | 347454 | 0 | 0 cigarettes per day | 20 to 30 cigarettes per day   | 0.431782 | 0.214337 |
| prostate_cancer      | 347458 | 0 | 0 cigarettes per day | 15 to 22.5 cigarettes per day | 0.722706 | 0.349217 |
| prostate_cancer      | 347458 | 0 | 0 cigarettes per day | 15 to 22.5 cigarettes per day | 0.593327 | 0.290337 |
| prostate_cancer      | 347458 | 0 | 0 cigarettes per day | 10 to 14 cigarettes per day   | 0.565314 | 0.36381  |
| prostate_cancer      | 347458 | 0 | 0 cigarettes per day | 1 to 9 cigarettes per day     | 0.131028 | 0.429646 |
| prostate_cancer      | 347458 | 0 | 0 cigarettes per day | 10 to 14 cigarettes per day   | 0.223144 | 0.336735 |
| prostate_cancer      | 347458 | 0 | 0 cigarettes per day | 1 to 9 cigarettes per day     | 0.223144 | 0.530612 |
| prostate_cancer      | 347464 | 0 | 0 cigarettes per day | 1 to 20 cigarettes per day    | 0.530628 | 0.397486 |
| prostate_cancer      | 347464 | 0 | 0 cigarettes per day | 20 to 30 cigarettes per day   | 0.641854 | 0.440618 |
| prostate_cancer      | 356281 | 0 | 0 cigarettes per day | 0 to 10 cigarettes per day    | -0.24846 | 0.538606 |
| prostate_cancer      | 356281 | 0 | 0 cigarettes per day | 10 to 20 cigarettes per day   | -0.35667 | 0.455611 |
| prostate_cancer      | 356281 | 0 | 0 cigarettes per day | 20 to 30 cigarettes per day   | 0.04879  | 0.470874 |
| prostate_cancer      | 358689 | 1 | 0 cigarettes per day | 20 to 30 cigarettes per day   | -0.44629 | 0.203284 |
| prostate_cancer      | 359183 | 1 | 0 cigarettes per day | 20 to 30 cigarettes per day   | -0.3285  | 0.070333 |
| prostate_cancer      | 359183 | 0 | 0 cigarettes per day | 0 to 10 cigarettes per day    | -0.15082 | 0.056261 |
| prostate_cancer      | 359183 | 1 | 0 cigarettes per day | 10 to 19 cigarettes per day   | -0.15082 | 0.05359  |
| prostate_cancer      | 359185 | 0 | 0 cigarettes per day | 1 to 14 cigarettes per day    | -0.03046 | 0.055159 |
| prostate_cancer      | 359185 | 1 | 0 cigarettes per day | 15 to 24 cigarettes per day   | -0.10536 | 0.059463 |
| prostate_cancer      | 359185 | 1 | 0 cigarettes per day | 25 to 37.5 cigarettes per day | -0.13926 | 0.09273  |
| prostate_cancer      | 359185 | 0 | 0 cigarettes per day | 1 to 14 cigarettes per day    | 0.173953 | 0.190452 |
| prostate_cancer      | 359185 | 0 | 0 cigarettes per day | 15 to 24 cigarettes per day   | 0.270027 | 0.191955 |
| prostate_cancer      | 359185 | 0 | 0 cigarettes per day | 25 to 37.5 cigarettes per day | 0.593327 | 0.247613 |
| prostate_cancer      | 359211 | 0 | 0 cigarettes per day | 13 to 19.5 cigarettes per day | -0.12783 | 0.168593 |
| prostate_cancer      | 359211 | 0 | 0 cigarettes per day | 0 to 13 cigarettes per day    | 0.067659 | 0.188612 |
| prostate_cancer      | 359212 | 0 | 0 cigarettes per day | 26 to 39 cigarettes per day   | 0.215111 | 0.154296 |
| prostate_cancer      | 359212 | 0 | 0 cigarettes per day | 18 to 25 cigarettes per day   | 0.215111 | 0.154296 |
| prostate_cancer      | 359212 | 0 | 0 cigarettes per day | 1 to 10 cigarettes per day    | -0.05129 | 0.161117 |
| prostate_cancer      | 359212 | 0 | 0 cigarettes per day | 11 to 17 cigarettes per day   | -0.17435 | 0.191327 |
| prostate_cancer      | 359215 | 0 | 0 cigarettes per day | 0 to 19 cigarettes per day    | -0.40048 | 0.159915 |
| prostate_cancer      | 359215 | 1 | 0 cigarettes per day | 20 to 39 cigarettes per day   | -0.17435 | 0.097182 |
| prostate_cancer      | 359218 | 0 | 0 cigarettes per day | 1 to 30 cigarettes per day    | 0.336472 | 0.400875 |
| prostate_cancer      | 359218 | 0 | 0 cigarettes per day | 31 to 46.5 cigarettes per day | 0.182322 | 0.255102 |
| prostate_cancer      | 428283 | 0 | 0 cigarettes per day | 60 to 90 cigarettes per day   | 0.277632 | 0.479283 |
| prostate_cancer      | 428283 | 0 | 0 cigarettes per day | 40 to 59 cigarettes per day   | 0.34359  | 0.28405  |
| prostate_cancer      | 428283 | 0 | 0 cigarettes per day | 0 to 19 cigarettes per day    | -0.34249 | 0.643145 |
| prostate_cancer      | 428283 | 0 | 0 cigarettes per day | 20 to 39 cigarettes per day   | 0.457425 | 0.269633 |
| rheumatoid_arthritis | 261500 | 0 | 0 cigarettes per day | 1 to 14 cigarettes per day    | 0.139762 | 0.173026 |
| rheumatoid_arthritis | 261500 | 0 | 0 cigarettes per day | 15 to 24 cigarettes per day   | 0.392042 | 0.143064 |
| rheumatoid_arthritis | 261500 | 0 | 0 cigarettes per day | 25 to 37.5 cigarettes per day | 0.587787 | 0.15873  |

|                      |        |   |                      |                               |          |          |
|----------------------|--------|---|----------------------|-------------------------------|----------|----------|
| rheumatoid_arthritis | 261510 | 0 | 0 cigarettes per day | 15 to 22.5 cigarettes per day | 0.09531  | 0.510204 |
| rheumatoid_arthritis | 261510 | 0 | 0 cigarettes per day | 1 to 14 cigarettes per day    | 0.09531  | 0.185529 |
| rheumatoid_arthritis | 261510 | 1 | 0 cigarettes per day | 15 to 22.5 cigarettes per day | 1.386294 | 0.357143 |
| rheumatoid_arthritis | 261510 | 1 | 0 cigarettes per day | 1 to 14 cigarettes per day    | 1.481605 | 0.359462 |
| rheumatoid_arthritis | 350653 | 0 | 0 cigarettes per day | 15 to 22.5 cigarettes per day | 0.378436 | 0.221904 |
| rheumatoid_arthritis | 350653 | 0 | 0 cigarettes per day | 8 to 14 cigarettes per day    | 0.783902 | 0.199189 |
| rheumatoid_arthritis | 350653 | 1 | 0 cigarettes per day | 1 to 7 cigarettes per day     | 0.837248 | 0.195468 |
| rheumatoid_arthritis | 353080 | 0 | 0 cigarettes per day | 1 to 15 cigarettes per day    | 0.770108 | 0.393282 |
| rheumatoid_arthritis | 353080 | 0 | 0 cigarettes per day | 17 to 25.5 cigarettes per day | -0.03046 | 0.489165 |
| rheumatoid_arthritis | 502082 | 0 | 0 cigarettes per day | 1 to 10 cigarettes per day    | -0.10536 | 0.770517 |
| rheumatoid_arthritis | 502082 | 0 | 0 cigarettes per day | 11 to 20 cigarettes per day   | 0.916291 | 0.457081 |
| rheumatoid_arthritis | 502082 | 0 | 0 cigarettes per day | 21 to 31.5 cigarettes per day | 1.609438 | 0.515889 |
| rheumatoid_arthritis | 502082 | 0 | 0 cigarettes per day | 1 to 10 cigarettes per day    | 0.336472 | 0.379611 |
| rheumatoid_arthritis | 502082 | 0 | 0 cigarettes per day | 11 to 20 cigarettes per day   | 0.587787 | 0.247296 |
| rheumatoid_arthritis | 502082 | 0 | 0 cigarettes per day | 21 to 31.5 cigarettes per day | 0.741937 | 0.287248 |
| rheumatoid_arthritis | 502084 | 0 | 0 cigarettes per day | 1 to 14 cigarettes per day    | 0.207014 | 0.11957  |
| rheumatoid_arthritis | 502084 | 0 | 0 cigarettes per day | 15 to 24 cigarettes per day   | 0.470004 | 0.106038 |
| rheumatoid_arthritis | 502084 | 0 | 0 cigarettes per day | 25 to 37.5 cigarettes per day | 0.524729 | 0.134207 |
| stomach_cancer       | 309835 | 0 | 0 pack-years         | 1 to 13 pack-years            | -0.10536 | 0.296722 |
| stomach_cancer       | 309835 | 1 | 0 pack-years         | 14 to 31 pack-years           | 0.832909 | 0.240934 |
| stomach_cancer       | 309835 | 1 | 0 pack-years         | 32 to 54 pack-years           | 1.029619 | 0.228015 |
| stomach_cancer       | 309835 | 0 | 0 pack-years         | 54 to 81 pack-years           | 0.916291 | 0.256511 |
| stomach_cancer       | 309835 | 0 | 0 pack-years         | 1 to 13 pack-years            | 0.182322 | 0.20687  |
| stomach_cancer       | 309835 | 0 | 0 pack-years         | 14 to 31 pack-years           | 0.405465 | 0.223334 |
| stomach_cancer       | 309835 | 0 | 0 pack-years         | 32 to 54 pack-years           | 0.530628 | 0.197242 |
| stomach_cancer       | 309835 | 0 | 0 pack-years         | 54 to 81 pack-years           | 0.741937 | 0.229792 |
| stomach_cancer       | 328266 | 0 | 0 pack-years         | 41 to 61.5 pack-years         | 1.029619 | 0.362598 |
| stomach_cancer       | 328266 | 0 | 0 pack-years         | 0 to 20 pack-years            | 0.262364 | 0.392971 |
| stomach_cancer       | 328266 | 0 | 0 pack-years         | 20 to 40 pack-years           | 0.405465 | 0.379611 |
| stomach_cancer       | 339695 | 0 | 0 pack-years         | 0.01 to 17.99 pack-years      | 0.262364 | 0.379477 |
| stomach_cancer       | 339695 | 0 | 0 pack-years         | 18 to 32.99 pack-years        | 0.336472 | 0.390786 |
| stomach_cancer       | 339695 | 0 | 0 pack-years         | 33 to 49.5 pack-years         | 0.832909 | 0.32106  |
| stomach_cancer       | 339697 | 0 | 0 pack-years         | 10 to 19 pack-years           | 0.019803 | 0.37606  |
| stomach_cancer       | 339697 | 0 | 0 pack-years         | 20 to 30 pack-years           | 0.239017 | 0.457081 |
| stomach_cancer       | 339697 | 0 | 0 pack-years         | 1 to 9 pack-years             | -0.16252 | 0.332502 |
| stomach_cancer       | 339697 | 0 | 0 pack-years         | 40 to 60 pack-years           | 0.518794 | 0.16175  |
| stomach_cancer       | 339697 | 0 | 0 pack-years         | 20 to 39 pack-years           | 0.431782 | 0.14871  |
| stomach_cancer       | 339697 | 0 | 0 pack-years         | 10 to 19 pack-years           | 0.04879  | 0.17167  |
| stomach_cancer       | 339697 | 0 | 0 pack-years         | 1 to 9 pack-years             | 0        | 0.176823 |
| stomach_cancer       | 340513 | 0 | 0 pack-years         | 1 to 13 pack-years            | 0.470004 | 0.271046 |
| stomach_cancer       | 340513 | 0 | 0 pack-years         | 14 to 25 pack-years           | 0.530628 | 0.270108 |
| stomach_cancer       | 340513 | 0 | 0 pack-years         | 26 to 50 pack-years           | 0.741937 | 0.279397 |
| stomach_cancer       | 340513 | 0 | 0 pack-years         | 51 to 76.5 pack-years         | 0.832909 | 0.266193 |

|                |        |   |              |                           |          |          |
|----------------|--------|---|--------------|---------------------------|----------|----------|
| stomach_cancer | 340528 | 1 | 0 pack-years | 33 to 49.5 pack-years     | 1.131402 | 0.485517 |
| stomach_cancer | 340528 | 0 | 0 pack-years | 33 to 49.5 pack-years     | 0.405465 | 0.272109 |
| stomach_cancer | 340528 | 0 | 0 pack-years | 19 to 32 pack-years       | 0.405465 | 0.272109 |
| stomach_cancer | 340528 | 0 | 0 pack-years | 1 to 18 pack-years        | 0.09531  | 0.556586 |
| stomach_cancer | 340528 | 0 | 0 pack-years | 1 to 18 pack-years        | -0.10536 | 0.283447 |
| stomach_cancer | 340528 | 0 | 0 pack-years | 19 to 32 pack-years       | 0.182322 | 0.57398  |
| stomach_cancer | 340554 | 0 | 0 pack-years | 41 to 61.5 pack-years     | 0.470004 | 0.302934 |
| stomach_cancer | 340554 | 1 | 0 pack-years | 41 to 61.5 pack-years     | -0.35667 | 0.400875 |
| stomach_cancer | 340554 | 0 | 0 pack-years | 0 to 40 pack-years        | -0.10536 | 0.311791 |
| stomach_cancer | 340554 | 0 | 0 pack-years | 0 to 40 pack-years        | 0.405465 | 0.255102 |
| stomach_cancer | 340578 | 0 | 0 pack-years | 30 to 45 pack-years       | 0.182322 | 0.191327 |
| stomach_cancer | 340578 | 0 | 0 pack-years | 20 to 29 pack-years       | 0.09531  | 0.20872  |
| stomach_cancer | 340578 | 0 | 0 pack-years | 10 to 19 pack-years       | 0        | 0.178571 |
| stomach_cancer | 340578 | 0 | 0 pack-years | 0 to 9 pack-years         | 0        | 0.204082 |
| stomach_cancer | 340582 | 1 | 0 pack-years | 40 to 59 pack-years       | 1.047319 | 0.145005 |
| stomach_cancer | 340582 | 0 | 0 pack-years | 60 to 90 pack-years       | 1.043804 | 0.244323 |
| stomach_cancer | 340582 | 0 | 0 pack-years | 60 to 90 pack-years       | 1.004302 | 0.241085 |
| stomach_cancer | 340582 | 1 | 0 pack-years | 40 to 59 pack-years       | 0.989541 | 0.14794  |
| stomach_cancer | 340582 | 1 | 0 pack-years | 20 to 39 pack-years       | 0.788457 | 0.169295 |
| stomach_cancer | 340582 | 0 | 0 pack-years | 60 to 90 pack-years       | 0.760806 | 0.158545 |
| stomach_cancer | 340582 | 0 | 0 pack-years | 60 to 90 pack-years       | 0.732368 | 0.161892 |
| stomach_cancer | 340582 | 1 | 0 pack-years | 20 to 39 pack-years       | 0.678034 | 0.170931 |
| stomach_cancer | 340582 | 0 | 0 pack-years | 0 to 19 pack-years        | 0.536493 | 0.241676 |
| stomach_cancer | 340582 | 0 | 0 pack-years | 0 to 19 pack-years        | 0.444686 | 0.21422  |
| stomach_cancer | 340582 | 0 | 0 pack-years | 0 to 19 pack-years        | 0.350657 | 0.24612  |
| stomach_cancer | 340582 | 0 | 0 pack-years | 20 to 39 pack-years       | 0.231112 | 0.216634 |
| stomach_cancer | 340582 | 0 | 0 pack-years | 20 to 39 pack-years       | 0.215111 | 0.216014 |
| stomach_cancer | 340582 | 0 | 0 pack-years | 40 to 59 pack-years       | 0.182322 | 0.272109 |
| stomach_cancer | 340582 | 0 | 0 pack-years | 40 to 59 pack-years       | 0.14842  | 0.268297 |
| stomach_cancer | 340582 | 0 | 0 pack-years | 0 to 19 pack-years        | 0.476234 | 0.213905 |
| stomach_cancer | 343580 | 0 | 0 pack-years | 75.05 to 112.5 pack-years | 0.641854 | 0.304572 |
| stomach_cancer | 343580 | 0 | 0 pack-years | 50.05 to 75 pack-years    | 0.530628 | 0.27161  |
| stomach_cancer | 343580 | 0 | 0 pack-years | 0.05 to 25 pack-years     | 0.470004 | 0.289536 |
| stomach_cancer | 343580 | 0 | 0 pack-years | 25.05 to 50 pack-years    | 0.470004 | 0.253381 |
| stomach_cancer | 347810 | 0 | 0 pack-years | 1 to 19.95 pack-years     | -0.75502 | 0.705601 |
| stomach_cancer | 347810 | 0 | 0 pack-years | 1 to 19.95 pack-years     | -0.73397 | 0.71216  |
| stomach_cancer | 347810 | 0 | 0 pack-years | 40 to 60 pack-years       | 0.270027 | 0.140209 |
| stomach_cancer | 347810 | 0 | 0 pack-years | 40 to 60 pack-years       | 0.285179 | 0.140018 |
| stomach_cancer | 347810 | 0 | 0 pack-years | 20 to 39.95 pack-years    | 0.300105 | 0.139834 |
| stomach_cancer | 347810 | 0 | 0 pack-years | 1 to 19.95 pack-years     | 0.307485 | 0.215711 |
| stomach_cancer | 347810 | 0 | 0 pack-years | 20 to 39.95 pack-years    | 0.307485 | 0.140681 |
| stomach_cancer | 347810 | 0 | 0 pack-years | 1 to 19.95 pack-years     | 0.322083 | 0.216282 |
| stomach_cancer | 347810 | 0 | 0 pack-years | 20 to 39.95 pack-years    | 0.582216 | 0.464599 |

|                |        |   |                      |                               |          |          |
|----------------|--------|---|----------------------|-------------------------------|----------|----------|
| stomach_cancer | 347810 | 0 | 0 pack-years         | 20 to 39.95 pack-years        | 0.615186 | 0.460563 |
| stomach_cancer | 502130 | 0 | 0 pack-years         | 20 to 29 pack-years           | 0.329304 | 0.316158 |
| stomach_cancer | 502130 | 0 | 0 pack-years         | 0 to 10 pack-years            | -0.17435 | 0.510136 |
| stomach_cancer | 502130 | 0 | 0 pack-years         | 10 to 19 pack-years           | 0.157004 | 0.33183  |
| stomach_cancer | 502130 | 0 | 0 pack-years         | 30 to 45 pack-years           | 0.732368 | 0.232197 |
| stomach_cancer | 502141 | 0 | 0 pack-years         | 1 to 30 pack-years            | 0.099845 | 0.098402 |
| stomach_cancer | 502141 | 0 | 0 pack-years         | 31 to 45 pack-years           | 0.167377 | 0.097462 |
| stroke         | 122237 | 0 | 0 cigarettes per day | 21 to 31.5 cigarettes per day | 0.182322 | 1.766582 |
| stroke         | 122237 | 0 | 0 cigarettes per day | 10 to 19 cigarettes per day   | 0.405465 | 1.413265 |
| stroke         | 122237 | 0 | 0 cigarettes per day | 1 to 9 cigarettes per day     | 0.641854 | 1.115736 |
| stroke         | 122237 | 0 | 0 cigarettes per day | 10 to 19 cigarettes per day   | 0.641854 | 1.115736 |
| stroke         | 122237 | 0 | 0 cigarettes per day | 21 to 31.5 cigarettes per day | 0.875469 | 0.883291 |
| stroke         | 122237 | 0 | 0 cigarettes per day | 1 to 9 cigarettes per day     | 0.993252 | 0.785147 |
| stroke         | 155207 | 0 | 0 cigarettes per day | 25 to 37.5 cigarettes per day | 1.000632 | 0.172569 |
| stroke         | 155207 | 0 | 0 cigarettes per day | 25 to 37.5 cigarettes per day | 0.871293 | 0.129152 |
| stroke         | 155207 | 0 | 0 cigarettes per day | 15 to 24 cigarettes per day   | 0.951658 | 0.09357  |
| stroke         | 155207 | 0 | 0 cigarettes per day | 1 to 14 cigarettes per day    | 0.615186 | 0.100662 |
| stroke         | 155207 | 0 | 0 cigarettes per day | 1 to 14 cigarettes per day    | 0.277632 | 0.117888 |
| stroke         | 155207 | 0 | 0 cigarettes per day | 15 to 24 cigarettes per day   | 0.698135 | 0.175145 |
| stroke         | 165539 | 0 | 0 cigarettes per day | 1 to 9 cigarettes per day     | 0.09531  | 0.143785 |
| stroke         | 165539 | 0 | 0 cigarettes per day | 10 to 15 cigarettes per day   | 0.405465 | 0.098639 |
| stroke         | 174238 | 0 | 0 cigarettes per day | 1 to 14 cigarettes per day    | 0.314811 | 1.547371 |
| stroke         | 174238 | 0 | 0 cigarettes per day | 15 to 24 cigarettes per day   | 0.457425 | 1.341708 |
| stroke         | 174238 | 0 | 0 cigarettes per day | 25 to 37.5 cigarettes per day | 0.641854 | 1.115736 |
| stroke         | 193978 | 0 | 0 cigarettes per day | 10 to 19 cigarettes per day   | 1.043804 | 0.397025 |
| stroke         | 193978 | 0 | 0 cigarettes per day | 20 to 30 cigarettes per day   | 1.302913 | 0.467918 |
| stroke         | 193978 | 0 | 0 cigarettes per day | 1 to 9 cigarettes per day     | 1.118415 | 0.521042 |
| stroke         | 193978 | 0 | 0 cigarettes per day | 10 to 19 cigarettes per day   | 1.004302 | 0.239217 |
| stroke         | 193978 | 0 | 0 cigarettes per day | 1 to 9 cigarettes per day     | 0.858662 | 0.432376 |
| stroke         | 193978 | 0 | 0 cigarettes per day | 20 to 30 cigarettes per day   | 0.97456  | 0.241625 |
| stroke         | 193978 | 0 | 0 cigarettes per day | 10 to 19 cigarettes per day   | 0.982078 | 0.312428 |
| stroke         | 193978 | 0 | 0 cigarettes per day | 20 to 30 cigarettes per day   | 0.756122 | 0.280253 |
| stroke         | 193978 | 0 | 0 cigarettes per day | 1 to 9 cigarettes per day     | 0.392042 | 1.018685 |
| stroke         | 298316 | 0 | 0 cigarettes per day | 0 to 20 cigarettes per day    | 1.410987 | 0.3111   |
| stroke         | 298316 | 1 | 0 cigarettes per day | 21 to 31.5 cigarettes per day | 2.406945 | 0.457345 |
| stroke         | 324092 | 0 | 0 cigarettes per day | 1 to 19 cigarettes per day    | 0.530628 | 0.165066 |
| stroke         | 324092 | 0 | 0 cigarettes per day | 21 to 31.5 cigarettes per day | 0.788457 | 0.162338 |
| stroke         | 324092 | 0 | 0 cigarettes per day | 1 to 19 cigarettes per day    | 0.470004 | 0.143495 |
| stroke         | 328259 | 0 | 0 cigarettes per day | 26 to 39 cigarettes per day   | 0.357674 | 0.390681 |
| stroke         | 328259 | 0 | 0 cigarettes per day | 16 to 25 cigarettes per day   | -0.52763 | 0.453995 |
| stroke         | 328259 | 0 | 0 cigarettes per day | 1 to 7 cigarettes per day     | -0.08338 | 0.119232 |
| stroke         | 328259 | 0 | 0 cigarettes per day | 1 to 7 cigarettes per day     | -0.01005 | 0.108225 |
| stroke         | 328259 | 1 | 0 cigarettes per day | 16 to 25 cigarettes per day   | 0        | 0.183673 |



|        |        |   |                      |                               |          |          |
|--------|--------|---|----------------------|-------------------------------|----------|----------|
| stroke | 328259 | 1 | 0 cigarettes per day | 8 to 15 cigarettes per day    | 0.04879  | 0.133625 |
| stroke | 328259 | 0 | 0 cigarettes per day | 8 to 15 cigarettes per day    | 0.231112 | 0.141723 |
| stroke | 328460 | 0 | 0 cigarettes per day | 0 to 9 cigarettes per day     | 0.765468 | 0.290698 |
| stroke | 328460 | 0 | 0 cigarettes per day | 21 to 31.5 cigarettes per day | -0.04082 | 0.326849 |
| stroke | 328460 | 0 | 0 cigarettes per day | 10 to 19 cigarettes per day   | 0.24686  | 0.277025 |
| stroke | 330677 | 0 | 0 cigarettes per day | 1 to 9 cigarettes per day     | 0.182322 | 0.065901 |
| stroke | 330677 | 1 | 0 cigarettes per day | 10 to 19 cigarettes per day   | 0.19062  | 0.082223 |
| stroke | 330677 | 1 | 0 cigarettes per day | 10 to 19 cigarettes per day   | 0.198851 | 0.052275 |
| stroke | 330677 | 0 | 0 cigarettes per day | 1 to 9 cigarettes per day     | 0.207014 | 0.05185  |
| stroke | 330677 | 1 | 0 cigarettes per day | 21 to 31.5 cigarettes per day | 0.314811 | 0.046551 |
| stroke | 330677 | 1 | 0 cigarettes per day | 21 to 31.5 cigarettes per day | 0.350657 | 0.100604 |
| stroke | 330932 | 0 | 0 cigarettes per day | 1 to 9 cigarettes per day     | 0.34359  | 0.40165  |
| stroke | 330932 | 0 | 0 cigarettes per day | 10 to 20 cigarettes per day   | 0.157004 | 0.97026  |
| stroke | 330932 | 0 | 0 cigarettes per day | 22 to 33 cigarettes per day   | 0.500775 | 0.64162  |
| stroke | 330932 | 0 | 0 cigarettes per day | 1 to 9 cigarettes per day     | 0.683097 | 0.315657 |
| stroke | 330932 | 0 | 0 cigarettes per day | 10 to 20 cigarettes per day   | 0.815365 | 0.320571 |
| stroke | 330932 | 0 | 0 cigarettes per day | 22 to 33 cigarettes per day   | 1.927164 | 0.979562 |
| stroke | 331371 | 0 | 0 cigarettes per day | 1 to 19 cigarettes per day    | 0.565314 | 0.243506 |
| stroke | 331371 | 0 | 0 cigarettes per day | 1 to 19 cigarettes per day    | 0.41871  | 0.181257 |
| stroke | 331371 | 0 | 0 cigarettes per day | 20 to 30 cigarettes per day   | 1.153732 | 0.449044 |
| stroke | 331371 | 0 | 0 cigarettes per day | 1 to 19 cigarettes per day    | 0.270027 | 0.477099 |
| stroke | 331371 | 0 | 0 cigarettes per day | 20 to 30 cigarettes per day   | 0.24686  | 0.239158 |
| stroke | 331371 | 0 | 0 cigarettes per day | 1 to 19 cigarettes per day    | 0.19062  | 0.375274 |
| stroke | 331371 | 1 | 0 cigarettes per day | 20 to 30 cigarettes per day   | -0.03046 | 0.194614 |
| stroke | 331371 | 0 | 0 cigarettes per day | 20 to 30 cigarettes per day   | -0.59784 | 1.846011 |
| stroke | 331705 | 0 | 0 cigarettes per day | 0 to 9 cigarettes per day     | 0.14842  | 0.101161 |
| stroke | 331705 | 0 | 0 cigarettes per day | 0 to 9 cigarettes per day     | 0.329304 | 0.067905 |
| stroke | 331710 | 0 | 0 cigarettes per day | 1 to 20 cigarettes per day    | 0.350657 | 0.370078 |
| stroke | 331710 | 0 | 0 cigarettes per day | 1 to 20 cigarettes per day    | 0.470004 | 0.299745 |
| stroke | 331710 | 0 | 0 cigarettes per day | 22 to 33 cigarettes per day   | 0.774727 | 0.377363 |
| stroke | 331710 | 0 | 0 cigarettes per day | 22 to 33 cigarettes per day   | 1.363537 | 0.764654 |
| stroke | 332100 | 0 | 0 cigarettes per day | 1 to 19 cigarettes per day    | 0.131028 | 0.129789 |
| stroke | 332100 | 1 | 0 cigarettes per day | 20 to 39 cigarettes per day   | 0.277632 | 0.106293 |
| stroke | 332100 | 0 | 0 cigarettes per day | 40 to 60 cigarettes per day   | 0.29267  | 0.171337 |
| stroke | 332100 | 0 | 0 cigarettes per day | 1 to 19 cigarettes per day    | 1.160021 | 0.530996 |
| stroke | 332100 | 0 | 0 cigarettes per day | 40 to 60 cigarettes per day   | 1.319086 | 0.656172 |
| stroke | 332100 | 0 | 0 cigarettes per day | 20 to 39 cigarettes per day   | 1.329724 | 0.471061 |
| stroke | 332104 | 0 | 0 cigarettes per day | 1 to 19 cigarettes per day    | 0.647103 | 0.177636 |
| stroke | 332104 | 0 | 0 cigarettes per day | 22 to 33 cigarettes per day   | 0.751416 | 0.179293 |
| stroke | 332104 | 0 | 0 cigarettes per day | 20 to 20 cigarettes per day   | 0.576613 | 0.199209 |
| stroke | 334028 | 0 | 0 cigarettes per day | 35 to 52.5 cigarettes per day | 2.324347 | 0.546897 |
| stroke | 334028 | 0 | 0 cigarettes per day | 25 to 34 cigarettes per day   | 2.073172 | 0.467527 |
| stroke | 334028 | 0 | 0 cigarettes per day | 1 to 14 cigarettes per day    | 1.453953 | 0.47027  |

|        |        |   |                      |                               |          |          |
|--------|--------|---|----------------------|-------------------------------|----------|----------|
| stroke | 334028 | 0 | 0 cigarettes per day | 15 to 24 cigarettes per day   | 1.391282 | 0.421363 |
| stroke | 334410 | 0 | 0 cigarettes per day | 1 to 15 cigarettes per day    | 0.688633 | 0.146066 |
| stroke | 334410 | 0 | 0 cigarettes per day | 36 to 45 cigarettes per day   | 0.896272 | 0.14814  |
| stroke | 334410 | 0 | 0 cigarettes per day | 16 to 25 cigarettes per day   | 0.903598 | 0.111405 |
| stroke | 334410 | 0 | 0 cigarettes per day | 26 to 35 cigarettes per day   | 1.039863 | 0.126612 |
| stroke | 334731 | 0 | 0 cigarettes per day | 25 to 37.5 cigarettes per day | 0.565314 | 0.140596 |
| stroke | 334731 | 0 | 0 cigarettes per day | 15 to 24 cigarettes per day   | 0.392042 | 0.162024 |
| stroke | 334731 | 0 | 0 cigarettes per day | 25 to 37.5 cigarettes per day | 0.322083 | 0.166371 |
| stroke | 334731 | 0 | 0 cigarettes per day | 1 to 14 cigarettes per day    | 0.223144 | 0.17551  |
| stroke | 334731 | 0 | 0 cigarettes per day | 1 to 14 cigarettes per day    | 0.076961 | 0.179516 |
| stroke | 334731 | 0 | 0 cigarettes per day | 15 to 24 cigarettes per day   | 0.307485 | 0.161315 |
| stroke | 334814 | 0 | 0 cigarettes per day | 1 to 10 cigarettes per day    | -0.40048 | 0.932836 |
| stroke | 334814 | 0 | 0 cigarettes per day | 22 to 33 cigarettes per day   | 0.792993 | 0.487118 |
| stroke | 334814 | 0 | 0 cigarettes per day | 11 to 20 cigarettes per day   | 0.900161 | 0.413763 |
| stroke | 334967 | 0 | 0 cigarettes per day | 21 to 31.5 cigarettes per day | 0.948299 | 0.456084 |
| stroke | 334967 | 0 | 0 cigarettes per day | 10 to 19 cigarettes per day   | 0.848286 | 0.466922 |
| stroke | 334967 | 0 | 0 cigarettes per day | 1 to 9 cigarettes per day     | 0.144714 | 0.646966 |
| stroke | 335266 | 1 | 0 cigarettes per day | 21 to 31.5 cigarettes per day | 0.24686  | 0.109614 |
| stroke | 335266 | 1 | 0 cigarettes per day | 10 to 20 cigarettes per day   | 0.039221 | 0.117739 |
| stroke | 335266 | 0 | 0 cigarettes per day | 0 to 9 cigarettes per day     | 0.039221 | 0.117739 |
| stroke | 335914 | 0 | 0 cigarettes per day | 10 to 19 cigarettes per day   | 0.34359  | 0.14293  |
| stroke | 335914 | 0 | 0 cigarettes per day | 21 to 31.5 cigarettes per day | 0.357674 | 0.137363 |
| stroke | 335914 | 0 | 0 cigarettes per day | 1 to 9 cigarettes per day     | 0.672944 | 0.1692   |
| stroke | 335914 | 0 | 0 cigarettes per day | 1 to 9 cigarettes per day     | 0.756122 | 0.259893 |
| stroke | 335914 | 0 | 0 cigarettes per day | 10 to 19 cigarettes per day   | 0.81978  | 0.244988 |
| stroke | 335914 | 0 | 0 cigarettes per day | 21 to 31.5 cigarettes per day | 1.047319 | 0.266738 |
| stroke | 336216 | 0 | 0 cigarettes per day | 40 to 60 cigarettes per day   | 0.737164 | 0.126941 |
| stroke | 336216 | 0 | 0 cigarettes per day | 20 to 39 cigarettes per day   | 0.71295  | 0.078782 |
| stroke | 336216 | 0 | 0 cigarettes per day | 20 to 39 cigarettes per day   | 0.732368 | 0.127551 |
| stroke | 336216 | 0 | 0 cigarettes per day | 10 to 19 cigarettes per day   | 0.746688 | 0.099139 |
| stroke | 336216 | 0 | 0 cigarettes per day | 0 to 9 cigarettes per day     | 0.698135 | 0.126916 |
| stroke | 336216 | 0 | 0 cigarettes per day | 40 to 60 cigarettes per day   | 0.943906 | 0.178671 |
| stroke | 336216 | 0 | 0 cigarettes per day | 20 to 39 cigarettes per day   | 0.993252 | 0.074641 |
| stroke | 336216 | 0 | 0 cigarettes per day | 40 to 60 cigarettes per day   | 1.05779  | 0.307363 |
| stroke | 336216 | 0 | 0 cigarettes per day | 20 to 39 cigarettes per day   | 0.81093  | 0.14059  |
| stroke | 336216 | 0 | 0 cigarettes per day | 20 to 39 cigarettes per day   | 0.683097 | 0.085034 |
| stroke | 336216 | 0 | 0 cigarettes per day | 10 to 19 cigarettes per day   | 0.615186 | 0.118588 |
| stroke | 336216 | 0 | 0 cigarettes per day | 10 to 19 cigarettes per day   | 0.542324 | 0.115686 |
| stroke | 336216 | 0 | 0 cigarettes per day | 0 to 9 cigarettes per day     | 0.198851 | 0.094095 |
| stroke | 336216 | 0 | 0 cigarettes per day | 0 to 9 cigarettes per day     | 0.254642 | 0.142383 |
| stroke | 336216 | 1 | 0 cigarettes per day | 10 to 19 cigarettes per day   | 0.277632 | 0.079236 |
| stroke | 336216 | 0 | 0 cigarettes per day | 40 to 60 cigarettes per day   | 0.34359  | 0.416124 |
| stroke | 336216 | 0 | 0 cigarettes per day | 0 to 9 cigarettes per day     | 0.00995  | 0.103556 |

|        |        |   |                      |                               |          |          |
|--------|--------|---|----------------------|-------------------------------|----------|----------|
| stroke | 336216 | 0 | 0 cigarettes per day | 0 to 9 cigarettes per day     | 0.431782 | 0.139147 |
| stroke | 336216 | 0 | 0 cigarettes per day | 40 to 60 cigarettes per day   | 0.438255 | 0.128374 |
| stroke | 336216 | 0 | 0 cigarettes per day | 10 to 19 cigarettes per day   | 0.530628 | 0.090036 |
| stroke | 336216 | 1 | 0 cigarettes per day | 20 to 39 cigarettes per day   | 0.371564 | 0.059817 |
| stroke | 336319 | 0 | 0 cigarettes per day | 25 to 37.5 cigarettes per day | -1.20397 | 1.794218 |
| stroke | 336319 | 0 | 0 cigarettes per day | 15 to 24 cigarettes per day   | 0.173953 | 0.621677 |
| stroke | 336319 | 0 | 0 cigarettes per day | 15 to 24 cigarettes per day   | 0.29267  | 0.426439 |
| stroke | 336319 | 0 | 0 cigarettes per day | 1 to 14 cigarettes per day    | 0.378436 | 0.318004 |
| stroke | 336319 | 0 | 0 cigarettes per day | 1 to 14 cigarettes per day    | 0.86289  | 0.256178 |
| stroke | 336319 | 0 | 0 cigarettes per day | 25 to 37.5 cigarettes per day | 0.871293 | 0.49953  |
| stroke | 336801 | 0 | 0 cigarettes per day | 22 to 33 cigarettes per day   | 0.788457 | 0.31308  |
| stroke | 336801 | 0 | 0 cigarettes per day | 20 to 20 cigarettes per day   | 0.788457 | 0.231911 |
| stroke | 336801 | 0 | 0 cigarettes per day | 22 to 33 cigarettes per day   | 0.470004 | 0.111607 |
| stroke | 336801 | 1 | 0 cigarettes per day | 20 to 20 cigarettes per day   | 0.336472 | 0.080175 |
| stroke | 336801 | 0 | 0 cigarettes per day | 1 to 19 cigarettes per day    | 0.300105 | 0.066138 |
| stroke | 336801 | 0 | 0 cigarettes per day | 1 to 19 cigarettes per day    | 0.300105 | 0.132275 |
| stroke | 343297 | 0 | 0 cigarettes per day | 1 to 20 cigarettes per day    | 0.875469 | 0.212585 |
| stroke | 343297 | 0 | 0 cigarettes per day | 20 to 20 cigarettes per day   | 0.955511 | 0.24529  |
| stroke | 343297 | 0 | 0 cigarettes per day | 22 to 33 cigarettes per day   | 1.252763 | 0.182216 |
| stroke | 343300 | 0 | 0 cigarettes per day | 21 to 31.5 cigarettes per day | 2.230014 | 0.650099 |
| stroke | 343300 | 1 | 0 cigarettes per day | 21 to 31.5 cigarettes per day | 2.054124 | 0.385924 |
| stroke | 343300 | 0 | 0 cigarettes per day | 21 to 31.5 cigarettes per day | 1.824549 | 0.576037 |
| stroke | 343300 | 1 | 0 cigarettes per day | 0 to 20 cigarettes per day    | 1.435085 | 0.291545 |
| stroke | 343300 | 0 | 0 cigarettes per day | 0 to 20 cigarettes per day    | 1.131402 | 0.518433 |
| stroke | 343300 | 0 | 0 cigarettes per day | 0 to 20 cigarettes per day    | 1.629241 | 0.390156 |
| stroke | 343306 | 0 | 0 cigarettes per day | 1 to 14 cigarettes per day    | 0.81978  | 0.148341 |
| stroke | 343306 | 0 | 0 cigarettes per day | 25 to 34 cigarettes per day   | 1.07841  | 0.189157 |
| stroke | 343306 | 0 | 0 cigarettes per day | 35 to 52.5 cigarettes per day | 1.081805 | 0.258561 |
| stroke | 343306 | 1 | 0 cigarettes per day | 15 to 24 cigarettes per day   | 1.172482 | 0.124787 |
| stroke | 343582 | 0 | 0 cigarettes per day | 1 to 14 cigarettes per day    | 0.457425 | 1.341708 |
| stroke | 343582 | 0 | 0 cigarettes per day | 15 to 24 cigarettes per day   | 0.559616 | 1.21137  |
| stroke | 343582 | 0 | 0 cigarettes per day | 25 to 37.5 cigarettes per day | 0.392042 | 1.432363 |
| stroke | 343582 | 0 | 0 cigarettes per day | 25 to 37.5 cigarettes per day | 0.788457 | 0.96359  |
| stroke | 343582 | 0 | 0 cigarettes per day | 15 to 24 cigarettes per day   | 0.582216 | 1.184301 |
| stroke | 343582 | 0 | 0 cigarettes per day | 25 to 37.5 cigarettes per day | 0.385262 | 1.442107 |
| stroke | 343582 | 0 | 0 cigarettes per day | 25 to 37.5 cigarettes per day | 0.285179 | 1.593908 |
| stroke | 343582 | 0 | 0 cigarettes per day | 1 to 14 cigarettes per day    | 0.19062  | 1.751982 |
| stroke | 343582 | 0 | 0 cigarettes per day | 1 to 14 cigarettes per day    | 0.14842  | 1.827498 |
| stroke | 343582 | 0 | 0 cigarettes per day | 15 to 24 cigarettes per day   | 0.04879  | 2.01895  |
| stroke | 343582 | 0 | 0 cigarettes per day | 1 to 14 cigarettes per day    | -0.01005 | 2.141311 |
| stroke | 343582 | 0 | 0 cigarettes per day | 15 to 24 cigarettes per day   | -0.23572 | 2.683415 |
| stroke | 343647 | 0 | 0 cigarettes per day | 15 to 24 cigarettes per day   | 0.991271 | 0.433303 |
| stroke | 343647 | 0 | 0 cigarettes per day | 26 to 39 cigarettes per day   | 0.794684 | 0.487908 |

|        |        |   |                      |                               |          |          |
|--------|--------|---|----------------------|-------------------------------|----------|----------|
| stroke | 343647 | 0 | 0 cigarettes per day | 26 to 39 cigarettes per day   | 0.788457 | 0.595431 |
| stroke | 343647 | 0 | 0 cigarettes per day | 15 to 24 cigarettes per day   | 0.336472 | 0.625911 |
| stroke | 343647 | 0 | 0 cigarettes per day | 1 to 14 cigarettes per day    | 0.587787 | 0.62585  |
| stroke | 343647 | 0 | 0 cigarettes per day | 15 to 24 cigarettes per day   | 0.296068 | 0.260877 |
| stroke | 343647 | 0 | 0 cigarettes per day | 1 to 14 cigarettes per day    | 0.23679  | 0.497853 |
| stroke | 343647 | 0 | 0 cigarettes per day | 1 to 14 cigarettes per day    | -0.05337 | 0.227917 |
| stroke | 343647 | 0 | 0 cigarettes per day | 26 to 39 cigarettes per day   | 0.331925 | 0.381652 |
| stroke | 344308 | 0 | 0 cigarettes per day | 1 to 19 cigarettes per day    | 0.620576 | 0.314077 |
| stroke | 344308 | 0 | 0 cigarettes per day | 20 to 30 cigarettes per day   | 0.996949 | 0.201446 |
| stroke | 344315 | 0 | 0 cigarettes per day | 41 to 61.5 cigarettes per day | 2.208274 | 0.639157 |
| stroke | 344315 | 0 | 0 cigarettes per day | 1 to 10 cigarettes per day    | 0.788457 | 0.20872  |
| stroke | 344315 | 0 | 0 cigarettes per day | 11 to 20 cigarettes per day   | 0.916291 | 0.22449  |
| stroke | 344315 | 0 | 0 cigarettes per day | 21 to 39 cigarettes per day   | 1.458615 | 0.486474 |
| stroke | 344318 | 0 | 0 cigarettes per day | 15 to 22.5 cigarettes per day | 1.23256  | 0.356994 |
| stroke | 344318 | 0 | 0 cigarettes per day | 0 to 14 cigarettes per day    | 0.65752  | 0.564397 |
| stroke | 344318 | 0 | 0 cigarettes per day | 0 to 14 cigarettes per day    | 0.722706 | 0.568407 |
| stroke | 344340 | 0 | 0 cigarettes per day | 0 to 19 cigarettes per day    | 1.199965 | 0.638523 |
| stroke | 344340 | 0 | 0 cigarettes per day | 1 to 20 cigarettes per day    | 1.199965 | 0.638523 |
| stroke | 344340 | 0 | 0 cigarettes per day | 20 to 30 cigarettes per day   | 1.813195 | 0.345823 |
| stroke | 344340 | 0 | 0 cigarettes per day | 21 to 31.5 cigarettes per day | 1.813195 | 0.345823 |
| stroke | 344343 | 0 | 0 cigarettes per day | 1 to 9 cigarettes per day     | 0.262364 | 0.255102 |
| stroke | 344343 | 0 | 0 cigarettes per day | 10 to 20 cigarettes per day   | 0.587787 | 0.170068 |
| stroke | 344343 | 0 | 0 cigarettes per day | 22 to 33 cigarettes per day   | 0.788457 | 0.405844 |
| stroke | 344345 | 0 | 0 cigarettes per day | 16 to 24 cigarettes per day   | 0.182322 | 1.766582 |
| stroke | 344345 | 0 | 0 cigarettes per day | 1 to 15 cigarettes per day    | 0.09531  | 1.92718  |
| stroke | 344345 | 0 | 0 cigarettes per day | 1 to 15 cigarettes per day    | 0.587787 | 1.177721 |
| stroke | 344345 | 0 | 0 cigarettes per day | 16 to 24 cigarettes per day   | 0.916291 | 0.847959 |
| stroke | 344359 | 0 | 0 cigarettes per day | 1 to 14 cigarettes per day    | 0.916291 | 0.22449  |
| stroke | 344359 | 0 | 0 cigarettes per day | 14 to 25 cigarettes per day   | 1.064711 | 0.193526 |
| stroke | 344359 | 0 | 0 cigarettes per day | 26 to 39 cigarettes per day   | 1.335001 | 0.194683 |
| stroke | 344360 | 0 | 0 cigarettes per day | 40 to 40 cigarettes per day   | 0.641854 | 1.115736 |
| stroke | 344360 | 0 | 0 cigarettes per day | 30 to 30 cigarettes per day   | 0.512824 | 1.2694   |
| stroke | 344360 | 0 | 0 cigarettes per day | 40 to 40 cigarettes per day   | 0.678034 | 1.07609  |
| stroke | 344360 | 0 | 0 cigarettes per day | 30 to 30 cigarettes per day   | 0.482426 | 1.308579 |
| stroke | 344360 | 0 | 0 cigarettes per day | 20 to 20 cigarettes per day   | 0.322083 | 1.536158 |
| stroke | 344360 | 0 | 0 cigarettes per day | 10 to 10 cigarettes per day   | 0.173953 | 1.781427 |
| stroke | 344360 | 0 | 0 cigarettes per day | 10 to 10 cigarettes per day   | 0.157004 | 1.811879 |
| stroke | 344360 | 0 | 0 cigarettes per day | 20 to 20 cigarettes per day   | 0.336472 | 1.514213 |
| stroke | 344362 | 0 | 0 cigarettes per day | 40 to 60 cigarettes per day   | -0.21072 | 2.617158 |
| stroke | 344362 | 0 | 0 cigarettes per day | 10 to 39 cigarettes per day   | -0.16252 | 2.493998 |
| stroke | 344362 | 0 | 0 cigarettes per day | 1 to 9 cigarettes per day     | 0.254642 | 1.643332 |
| stroke | 350743 | 0 | 0 cigarettes per day | 20 to 30 cigarettes per day   | 1.686399 | 0.316515 |
| stroke | 350743 | 0 | 0 cigarettes per day | 21 to 31.5 cigarettes per day | 1.686399 | 0.316515 |

|        |        |   |                      |                               |          |          |
|--------|--------|---|----------------------|-------------------------------|----------|----------|
| stroke | 350743 | 0 | 0 cigarettes per day | 1 to 20 cigarettes per day    | 1.193922 | 0.255102 |
| stroke | 350743 | 0 | 0 cigarettes per day | 1 to 20 cigarettes per day    | 1.193922 | 0.255102 |
| stroke | 350747 | 0 | 0 cigarettes per day | 1 to 19 cigarettes per day    | 0.806476 | 0.321155 |
| stroke | 350747 | 0 | 0 cigarettes per day | 0 to 19 cigarettes per day    | 0.806476 | 0.321155 |
| stroke | 350747 | 0 | 0 cigarettes per day | 21 to 31.5 cigarettes per day | 1.000632 | 0.39297  |
| stroke | 350747 | 0 | 0 cigarettes per day | 21 to 31.5 cigarettes per day | 1.000632 | 0.39297  |
| stroke | 350749 | 0 | 0 cigarettes per day | 21 to 31.5 cigarettes per day | 1.223775 | 0.554472 |
| stroke | 350749 | 0 | 0 cigarettes per day | 0 to 19 cigarettes per day    | 0.593327 | 1.878735 |
| stroke | 350753 | 1 | 0 cigarettes per day | 11 to 20 cigarettes per day   | 1.358409 | 0.20395  |
| stroke | 350753 | 0 | 0 cigarettes per day | 21 to 30 cigarettes per day   | 1.015231 | 0.262496 |
| stroke | 350753 | 1 | 0 cigarettes per day | 21 to 30 cigarettes per day   | 2.122262 | 0.435048 |
| stroke | 350753 | 0 | 0 cigarettes per day | 31 to 46.5 cigarettes per day | 1.291984 | 0.393166 |
| stroke | 350753 | 0 | 0 cigarettes per day | 1 to 10 cigarettes per day    | 0.65752  | 0.265676 |
| stroke | 350753 | 0 | 0 cigarettes per day | 11 to 20 cigarettes per day   | 0.756122 | 0.197614 |
| stroke | 350753 | 1 | 0 cigarettes per day | 1 to 10 cigarettes per day    | 1.081805 | 0.185922 |
| stroke | 350757 | 0 | 0 cigarettes per day | 1 to 9 cigarettes per day     | 0.582216 | 0.490252 |
| stroke | 350757 | 0 | 0 cigarettes per day | 10 to 15 cigarettes per day   | 1.18479  | 0.409567 |
| stroke | 356591 | 0 | 0 cigarettes per day | 1 to 9 cigarettes per day     | 0.451076 | 0.043839 |
| stroke | 356591 | 0 | 0 cigarettes per day | 10 to 19 cigarettes per day   | 0.615186 | 0.034433 |
| stroke | 356591 | 0 | 0 cigarettes per day | 20 to 30 cigarettes per day   | 0.81093  | 0.036181 |
| stroke | 356591 | 1 | 0 cigarettes per day | 1 to 9 cigarettes per day     | 0.530628 | 0.036074 |
| stroke | 356591 | 0 | 0 cigarettes per day | 10 to 19 cigarettes per day   | 0.530628 | 0.035863 |
| stroke | 356591 | 0 | 0 cigarettes per day | 20 to 30 cigarettes per day   | 0.722706 | 0.034559 |
| stroke | 357417 | 1 | 0 cigarettes per day | 6 to 14 cigarettes per day    | 1.360977 | 0.234171 |
| stroke | 357417 | 1 | 0 cigarettes per day | 0 to 5 cigarettes per day     | 1.272566 | 0.291545 |
| stroke | 357417 | 1 | 0 cigarettes per day | 15 to 22.5 cigarettes per day | 1.536867 | 0.176103 |
| stroke | 357431 | 0 | 0 cigarettes per day | 21 to 31.5 cigarettes per day | 1.029619 | 0.273324 |
| stroke | 357431 | 0 | 0 cigarettes per day | 21 to 31.5 cigarettes per day | 1.570697 | 0.270482 |
| stroke | 357431 | 0 | 0 cigarettes per day | 1 to 10 cigarettes per day    | 0.751416 | 0.493358 |
| stroke | 357431 | 0 | 0 cigarettes per day | 1 to 10 cigarettes per day    | 0.582216 | 0.57006  |
| stroke | 357431 | 0 | 0 cigarettes per day | 11 to 20 cigarettes per day   | 0.620576 | 0.342879 |
| stroke | 357431 | 0 | 0 cigarettes per day | 11 to 20 cigarettes per day   | 0.451076 | 0.357468 |
| stroke | 357435 | 0 | 0 cigarettes per day | 11 to 20 cigarettes per day   | 0.451076 | 0.357468 |
| stroke | 357435 | 0 | 0 cigarettes per day | 1 to 10 cigarettes per day    | 0.582216 | 0.57006  |
| stroke | 357435 | 0 | 0 cigarettes per day | 11 to 20 cigarettes per day   | 0.620576 | 0.342879 |
| stroke | 357435 | 0 | 0 cigarettes per day | 1 to 10 cigarettes per day    | 0.751416 | 0.493358 |
| stroke | 357435 | 0 | 0 cigarettes per day | 21 to 31.5 cigarettes per day | 1.029619 | 0.273324 |
| stroke | 357435 | 0 | 0 cigarettes per day | 21 to 31.5 cigarettes per day | 1.570697 | 0.270482 |
| stroke | 357445 | 0 | 0 cigarettes per day | 21 to 31.5 cigarettes per day | 1.258461 | 0.564558 |
| stroke | 357445 | 0 | 0 cigarettes per day | 1 to 20 cigarettes per day    | 0.688135 | 0.352528 |
| stroke | 358462 | 0 | 0 cigarettes per day | 20 to 39 cigarettes per day   | -0.13926 | 0.39878  |
| stroke | 358462 | 0 | 0 cigarettes per day | 0 to 19 cigarettes per day    | -0.05129 | 0.373255 |
| stroke | 358462 | 0 | 0 cigarettes per day | 40 to 60 cigarettes per day   | 1.214913 | 0.887937 |

|        |        |   |                      |                               |          |          |
|--------|--------|---|----------------------|-------------------------------|----------|----------|
| stroke | 358466 | 0 | 0 cigarettes per day | 1 to 10 cigarettes per day    | 0.19062  | 0.198178 |
| stroke | 358466 | 0 | 0 cigarettes per day | 41 to 61.5 cigarettes per day | 1.656321 | 0.609519 |
| stroke | 358470 | 0 | 0 cigarettes per day | 0 to 20 cigarettes per day    | 0.512824 | 0.168031 |
| stroke | 358470 | 0 | 0 cigarettes per day | 21 to 31.5 cigarettes per day | 0.652325 | 0.220557 |
| stroke | 358476 | 0 | 0 cigarettes per day | 11 to 20 cigarettes per day   | 0.765468 | 0.552919 |
| stroke | 358476 | 1 | 0 cigarettes per day | 21 to 31.5 cigarettes per day | 1.991976 | 0.36647  |
| stroke | 358476 | 0 | 0 cigarettes per day | 11 to 20 cigarettes per day   | 1.272566 | 0.589522 |
| stroke | 358476 | 0 | 0 cigarettes per day | 21 to 31.5 cigarettes per day | 0.683097 | 0.410998 |
| stroke | 358476 | 0 | 0 cigarettes per day | 0 to 10 cigarettes per day    | 0.058269 | 0.700327 |
| stroke | 358476 | 0 | 0 cigarettes per day | 0 to 10 cigarettes per day    | 0.157004 | 0.481859 |
| stroke | 358506 | 0 | 0 cigarettes per day | 0 to 20 cigarettes per day    | 1.193922 | 0.270563 |
| stroke | 358506 | 0 | 0 cigarettes per day | 21 to 31.5 cigarettes per day | 1.722767 | 0.305211 |
| stroke | 358540 | 0 | 0 cigarettes per day | 1 to 14 cigarettes per day    | 0.741937 | 0.170068 |
| stroke | 358540 | 0 | 0 cigarettes per day | 16 to 24 cigarettes per day   | 0.916291 | 0.204082 |
| stroke | 358652 | 0 | 0 cigarettes per day | 1 to 9 cigarettes per day     | 0.371564 | 0.395848 |
| stroke | 412060 | 0 | 0 cigarettes per day | 21 to 31.5 cigarettes per day | 1.363537 | 0.764654 |
| stroke | 412060 | 0 | 0 cigarettes per day | 1 to 20 cigarettes per day    | 0.350657 | 0.370078 |
| stroke | 412060 | 0 | 0 cigarettes per day | 1 to 20 cigarettes per day    | 0.470004 | 0.299745 |
| stroke | 412060 | 0 | 0 cigarettes per day | 21 to 31.5 cigarettes per day | 0.774727 | 0.377363 |
| stroke | 429295 | 0 | 0 cigarettes per day | 10 to 15 cigarettes per day   | 0.955511 | 0.224581 |
| stroke | 429295 | 0 | 0 cigarettes per day | 1 to 9 cigarettes per day     | 0.832909 | 0.230323 |
| stroke | 429295 | 0 | 0 cigarettes per day | 1 to 9 cigarettes per day     | 1.163151 | 0.271146 |
| stroke | 429295 | 0 | 0 cigarettes per day | 10 to 15 cigarettes per day   | 0.955511 | 0.291351 |
| stroke | 432350 | 0 | 0 cigarettes per day | 25 to 37.5 cigarettes per day | 0.425268 | 0.125159 |
| stroke | 432350 | 1 | 0 cigarettes per day | 15 to 24 cigarettes per day   | 0.329304 | 0.091428 |
| stroke | 432350 | 0 | 0 cigarettes per day | 1 to 14 cigarettes per day    | 0.329304 | 0.080262 |
| stroke | 432350 | 1 | 0 cigarettes per day | 15 to 24 cigarettes per day   | 0.019803 | 0.054696 |
| stroke | 432350 | 1 | 0 cigarettes per day | 1 to 14 cigarettes per day    | 0.10436  | 0.048189 |
| stroke | 432350 | 1 | 0 cigarettes per day | 25 to 37.5 cigarettes per day | 0.086178 | 0.072042 |
| stroke | 501860 | 0 | 0 cigarettes per day | 20 to 30 cigarettes per day   | 1.10194  | 0.328646 |
| stroke | 501860 | 0 | 0 cigarettes per day | 10 to 19 cigarettes per day   | 1.381282 | 0.249557 |
| stroke | 501860 | 0 | 0 cigarettes per day | 1 to 9 cigarettes per day     | 1.040277 | 0.279219 |
| stroke | 501896 | 0 | 0 cigarettes per day | 1 to 19 cigarettes per day    | 0.307485 | 0.105723 |
| stroke | 501896 | 1 | 0 cigarettes per day | 20 to 30 cigarettes per day   | 0.29267  | 0.096445 |
| stroke | 501942 | 0 | 0 cigarettes per day | 30 to 45 cigarettes per day   | 0.636577 | 0.285711 |
| stroke | 501942 | 0 | 0 cigarettes per day | 1 to 14 cigarettes per day    | -0.10536 | 0.283508 |
| stroke | 501942 | 0 | 0 cigarettes per day | 30 to 45 cigarettes per day   | 0.307485 | 0.362073 |
| stroke | 501942 | 0 | 0 cigarettes per day | 15 to 29 cigarettes per day   | 0.198851 | 0.240374 |
| stroke | 501942 | 0 | 0 cigarettes per day | 15 to 29 cigarettes per day   | 0.122218 | 0.215161 |
| stroke | 501942 | 0 | 0 cigarettes per day | 30 to 45 cigarettes per day   | 1.226712 | 0.525455 |
| stroke | 501942 | 0 | 0 cigarettes per day | 15 to 29 cigarettes per day   | -0.75502 | 0.578746 |
| stroke | 501942 | 0 | 0 cigarettes per day | 1 to 14 cigarettes per day    | -0.13926 | 0.617004 |
| stroke | 501942 | 0 | 0 cigarettes per day | 1 to 14 cigarettes per day    | -0.09431 | 0.325585 |

|        |        |   |                      |                               |          |          |
|--------|--------|---|----------------------|-------------------------------|----------|----------|
| stroke | 501943 | 0 | 0 cigarettes per day | 1 to 9 cigarettes per day     | 0.506818 | 0.0796   |
| stroke | 501943 | 0 | 0 cigarettes per day | 10 to 20 cigarettes per day   | 0.587787 | 0.050907 |
| stroke | 501943 | 0 | 0 cigarettes per day | 21 to 31.5 cigarettes per day | 0.806476 | 0.048793 |
| stroke | 502077 | 0 | 0 cigarettes per day | 20 to 30 cigarettes per day   | 0.500775 | 0.0796   |
| stroke | 502077 | 1 | 0 cigarettes per day | 10 to 19 cigarettes per day   | 0.322083 | 0.075523 |
| stroke | 502077 | 0 | 0 cigarettes per day | 1 to 9 cigarettes per day     | 0.139762 | 0.07844  |
| stroke | 502248 | 0 | 0 cigarettes per day | 1 to 19 cigarettes per day    | 0.832909 | 0.266879 |
| stroke | 502248 | 0 | 0 cigarettes per day | 20 to 30 cigarettes per day   | 0.963174 | 0.330772 |
| stroke | 502250 | 0 | 0 cigarettes per day | 1 to 9 cigarettes per day     | 0.300105 | 0.44859  |
| stroke | 502250 | 0 | 0 cigarettes per day | 1 to 9 cigarettes per day     | 0.215111 | 0.4069   |
| stroke | 502250 | 0 | 0 cigarettes per day | 20 to 30 cigarettes per day   | 0.350657 | 0.257522 |
| stroke | 502250 | 0 | 0 cigarettes per day | 10 to 19 cigarettes per day   | 0.314811 | 0.275971 |
| stroke | 502250 | 0 | 0 cigarettes per day | 20 to 30 cigarettes per day   | 1.108563 | 0.116837 |
| stroke | 502250 | 0 | 0 cigarettes per day | 10 to 19 cigarettes per day   | 0.553885 | 0.250512 |
| stroke | 502250 | 0 | 0 cigarettes per day | 1 to 9 cigarettes per day     | 0.19062  | 0.209689 |
| stroke | 502250 | 1 | 0 cigarettes per day | 20 to 30 cigarettes per day   | 1.071584 | 0.079189 |
| stroke | 502250 | 0 | 0 cigarettes per day | 10 to 19 cigarettes per day   | 0.604316 | 0.105141 |
| stroke | 502250 | 0 | 0 cigarettes per day | 1 to 9 cigarettes per day     | 0.41871  | 0.186361 |
| stroke | 502250 | 0 | 0 cigarettes per day | 10 to 19 cigarettes per day   | 0.708036 | 0.115731 |
| stroke | 502250 | 0 | 0 cigarettes per day | 20 to 30 cigarettes per day   | 0.518794 | 0.317141 |
| tb     | 173863 | 0 | 0 cigarettes per day | 1 to 14 cigarettes per day    | 0.559616 | 1.697376 |
| tb     | 173863 | 0 | 0 cigarettes per day | 15 to 24 cigarettes per day   | 0.81093  | 1.320181 |
| tb     | 173863 | 0 | 0 cigarettes per day | 25 to 37.5 cigarettes per day | 1.609438 | 0.594082 |
| tb     | 236195 | 1 | 0 cigarettes per day | 1 to 19 cigarettes per day    | 0.00995  | 2.940998 |
| tb     | 236195 | 0 | 0 cigarettes per day | 20 to 20 cigarettes per day   | 0.207014 | 2.414966 |
| tb     | 236195 | 0 | 0 cigarettes per day | 1 to 19 cigarettes per day    | 0.215111 | 2.39549  |
| tb     | 236195 | 0 | 0 cigarettes per day | 20 to 20 cigarettes per day   | 0.392042 | 2.007033 |
| tb     | 236195 | 0 | 0 cigarettes per day | 22 to 33 cigarettes per day   | 0.451076 | 1.89198  |
| tb     | 236195 | 0 | 0 cigarettes per day | 22 to 33 cigarettes per day   | 0.708036 | 1.463255 |
| tb     | 298335 | 0 | 0 cigarettes per day | 0 to 4 cigarettes per day     | -0.10536 | 0.340136 |
| tb     | 298335 | 0 | 0 cigarettes per day | 5 to 7.5 cigarettes per day   | 0.262364 | 0.333595 |
| tb     | 298340 | 0 | 0 cigarettes per day | 5 to 15 cigarettes per day    | 0.182322 | 0.297619 |
| tb     | 298340 | 1 | 0 cigarettes per day | 16 to 29 cigarettes per day   | 0.336472 | 0.291545 |
| tb     | 298340 | 0 | 0 cigarettes per day | 30 to 45 cigarettes per day   | 0.470004 | 0.57398  |
| tb     | 298340 | 0 | 0 cigarettes per day | 0 to 4 cigarettes per day     | 0.587787 | 0.198413 |
| tb     | 327906 | 0 | 0 cigarettes per day | 0 to 9 cigarettes per day     | 1.308333 | 0.59294  |
| tb     | 327906 | 0 | 0 cigarettes per day | 10 to 15 cigarettes per day   | 0.609766 | 0.596162 |
| tb     | 327949 | 0 | 0 cigarettes per day | 5 to 15 cigarettes per day    | 0.14842  | 0.628958 |
| tb     | 327949 | 0 | 0 cigarettes per day | 0 to 5 cigarettes per day     | 0.625938 | 0.795318 |
| tb     | 327949 | 0 | 0 cigarettes per day | 15 to 25 cigarettes per day   | 0.760806 | 0.454177 |
| tb     | 327949 | 0 | 0 cigarettes per day | 26 to 39 cigarettes per day   | 1.638997 | 0.665742 |
| tb     | 327956 | 1 | 0 cigarettes per day | 20 to 30 cigarettes per day   | 0.198851 | 0.148461 |
| tb     | 327956 | 0 | 0 cigarettes per day | 1 to 9 cigarettes per day     | 0.019803 | 0.332633 |

|    |        |   |                      |                               |          |          |
|----|--------|---|----------------------|-------------------------------|----------|----------|
| tb | 327956 | 0 | 0 cigarettes per day | 10 to 19 cigarettes per day   | 0.09531  | 0.435993 |
| tb | 327956 | 0 | 0 cigarettes per day | 1 to 9 cigarettes per day     | 0.157004 | 0.139543 |
| tb | 327956 | 1 | 0 cigarettes per day | 10 to 19 cigarettes per day   | 0.215111 | 0.131666 |
| tb | 327956 | 0 | 0 cigarettes per day | 20 to 30 cigarettes per day   | 0.285179 | 0.726945 |
| tb | 343383 | 0 | 0 cigarettes per day | 1 to 10 cigarettes per day    | 0.631272 | 0.343482 |
| tb | 343383 | 0 | 0 cigarettes per day | 11 to 16.5 cigarettes per day | 0.625938 | 0.360486 |
| tb | 343582 | 0 | 0 cigarettes per day | 25 to 37.5 cigarettes per day | 1.652497 | 0.569044 |
| tb | 343582 | 0 | 0 cigarettes per day | 25 to 37.5 cigarettes per day | 1.181727 | 0.911168 |
| tb | 343582 | 0 | 0 cigarettes per day | 25 to 37.5 cigarettes per day | 1.890095 | 0.448702 |
| tb | 343582 | 0 | 0 cigarettes per day | 15 to 24 cigarettes per day   | 1.075002 | 1.013791 |
| tb | 343582 | 0 | 0 cigarettes per day | 15 to 24 cigarettes per day   | 0.350657 | 2.091837 |
| tb | 343582 | 0 | 0 cigarettes per day | 1 to 14 cigarettes per day    | 0.270027 | 2.267487 |
| tb | 343582 | 0 | 0 cigarettes per day | 1 to 14 cigarettes per day    | 0.029559 | 2.883891 |
| tb | 343582 | 0 | 0 cigarettes per day | 1 to 14 cigarettes per day    | 0.019803 | 2.912165 |
| tb | 343582 | 0 | 0 cigarettes per day | 1 to 14 cigarettes per day    | 0.86289  | 1.253337 |
| tb | 348044 | 0 | 0 cigarettes per day | 1 to 10 cigarettes per day    | 0.582216 | 0.628492 |
| tb | 348044 | 0 | 0 cigarettes per day | 11 to 16.5 cigarettes per day | 1.381282 | 0.726849 |
| tb | 348046 | 0 | 0 cigarettes per day | 1 to 10 cigarettes per day    | 0.559616 | 1.697376 |
| tb | 348046 | 0 | 0 cigarettes per day | 11 to 20 cigarettes per day   | 1.153732 | 0.937037 |
| tb | 348046 | 0 | 0 cigarettes per day | 21 to 31.5 cigarettes per day | 1.302913 | 0.807176 |
| tb | 348053 | 0 | 0 cigarettes per day | 15 to 22.5 cigarettes per day | 1.671473 | 0.558347 |
| tb | 348053 | 0 | 0 cigarettes per day | 5 to 9 cigarettes per day     | 0.371564 | 2.048557 |
| tb | 348053 | 0 | 0 cigarettes per day | 10 to 14 cigarettes per day   | 0.828552 | 1.297121 |
| tb | 348053 | 0 | 0 cigarettes per day | 15 to 22.5 cigarettes per day | 1.029619 | 1.06086  |
| tb | 348053 | 0 | 0 cigarettes per day | 5 to 9 cigarettes per day     | 1.283708 | 0.822828 |
| tb | 348053 | 1 | 0 cigarettes per day | 10 to 14 cigarettes per day   | 1.625311 | 0.584726 |
| tb | 359225 | 0 | 0 cigarettes per day | 21 to 31.5 cigarettes per day | 1.000632 | 0.469875 |
| tb | 359225 | 0 | 0 cigarettes per day | 1 to 10 cigarettes per day    | -0.15082 | 0.542833 |
| tb | 359225 | 0 | 0 cigarettes per day | 11 to 20 cigarettes per day   | 0.883768 | 0.502825 |
| tb | 359228 | 0 | 0 cigarettes per day | 5 to 10 cigarettes per day    | 0.34359  | 2.106672 |
| tb | 359228 | 0 | 0 cigarettes per day | 11 to 15 cigarettes per day   | 0.48858  | 1.822336 |
| tb | 359228 | 0 | 0 cigarettes per day | 16 to 20 cigarettes per day   | 0.548121 | 1.716999 |
| tb | 359228 | 0 | 0 cigarettes per day | 21 to 25 cigarettes per day   | 1.648659 | 0.571232 |
| tb | 359228 | 0 | 0 cigarettes per day | 26 to 39 cigarettes per day   | 1.648659 | 0.571232 |
| tb | 359230 | 1 | 0 cigarettes per day | 1 to 10 cigarettes per day    | 0.879627 | 0.168304 |
| tb | 359230 | 0 | 0 cigarettes per day | 11 to 16.5 cigarettes per day | 1.018847 | 0.142747 |
| tb | 359273 | 0 | 0 cigarettes per day | 0 to 10 cigarettes per day    | 0.262364 | 0.237441 |
| tb | 359273 | 0 | 0 cigarettes per day | 11 to 16.5 cigarettes per day | 0.593327 | 0.248055 |
| tb | 369826 | 0 | 0 cigarettes per day | 30 to 45 cigarettes per day   | 0.182322 | 0.786565 |
| tb | 501926 | 0 | 0 cigarettes per day | 1 to 12 cigarettes per day    | 0.57098  | 0.087541 |
| tb | 501926 | 0 | 0 cigarettes per day | 13 to 19.5 cigarettes per day | 0.802002 | 0.077343 |
| tb | 501936 | 0 | 0 cigarettes per day | 1 to 10 cigarettes per day    | 0.943906 | 0.317461 |
| tb | 501936 | 1 | 0 cigarettes per day | 11 to 20 cigarettes per day   | 2.506342 | 0.383595 |



## Section 9: GATHER and PRISMA checklists

### Section 9.1: PRISMA

Table 9: PRISMA Manuscript Checklist

| Section and Topic       | Item # | Checklist item                                                                                                                                                                                                                                                                                       | Location where item is reported                                                                                                                 |
|-------------------------|--------|------------------------------------------------------------------------------------------------------------------------------------------------------------------------------------------------------------------------------------------------------------------------------------------------------|-------------------------------------------------------------------------------------------------------------------------------------------------|
| <b>TITLE</b>            |        |                                                                                                                                                                                                                                                                                                      |                                                                                                                                                 |
| Title                   | 1      | Identify the report as a systematic review.                                                                                                                                                                                                                                                          | Following a request by the Journal, systematic review does not appear in the title, but it is in the abstract and first page of the manuscript. |
| <b>ABSTRACT</b>         |        |                                                                                                                                                                                                                                                                                                      |                                                                                                                                                 |
| Abstract                | 2      | See the PRISMA 2020 for Abstracts checklist.                                                                                                                                                                                                                                                         | Page 2, "Abstract", See PRISMA abstract checklist below                                                                                         |
| <b>INTRODUCTION</b>     |        |                                                                                                                                                                                                                                                                                                      |                                                                                                                                                 |
| Rationale               | 3      | Describe the rationale for the review in the context of existing knowledge.                                                                                                                                                                                                                          | Main text in the first and second paragraphs                                                                                                    |
| Objectives              | 4      | Provide an explicit statement of the objective(s) or question(s) the review addresses.                                                                                                                                                                                                               | Main text (second paragraph)                                                                                                                    |
| <b>METHODS</b>          |        |                                                                                                                                                                                                                                                                                                      |                                                                                                                                                 |
| Eligibility criteria    | 5      | Specify the inclusion and exclusion criteria for the review and how studies were grouped for the syntheses.                                                                                                                                                                                          | Main text (Methods Overview and Systematic review of literature and data extraction sections); SI Section 1; SI Section 5                       |
| Information sources     | 6      | Specify all databases, registers, websites, organisations, reference lists and other sources searched or consulted to identify studies. Specify the date when each source was last searched or consulted.                                                                                            | Main text (Methods Systematic review of literature and data extraction section); SI Section 1.1                                                 |
| Search strategy         | 7      | Present the full search strategies for all databases, registers and websites, including any filters and limits used.                                                                                                                                                                                 | SI Section 1.1                                                                                                                                  |
| Selection process       | 8      | Specify the methods used to decide whether a study met the inclusion criteria of the review, including how many reviewers screened each record and each report retrieved, whether they worked independently, and if applicable, details of automation tools used in the process.                     | Main text (Methods Systematic review of literature and data extraction section); SI Section 1.1                                                 |
| Data collection process | 9      | Specify the methods used to collect data from reports, including how many reviewers collected data from each report, whether they worked independently, any processes for obtaining or confirming data from study investigators, and if applicable, details of automation tools used in the process. | Main text (Methods Systematic review of literature and data extraction section); SI Section 1.4                                                 |
| Data items              | 10a    | List and define all outcomes for which data were sought. Specify whether all results that were compatible with each outcome domain in each study were sought (e.g. for all measures, time points, analyses), and if not, the methods used to decide which results to collect.                        | Main text (Methods Overview); SI Section 1.3                                                                                                    |
|                         | 10b    | List and define all other variables for which data were sought (e.g. participant and intervention characteristics, funding sources).                                                                                                                                                                 | SI Section 5.1; SI Section 1.4                                                                                                                  |

|                               |     |                                                                                                                                                                                                                                                                   |                                                                                                                                           |
|-------------------------------|-----|-------------------------------------------------------------------------------------------------------------------------------------------------------------------------------------------------------------------------------------------------------------------|-------------------------------------------------------------------------------------------------------------------------------------------|
|                               |     | Describe any assumptions made about any missing or unclear information.                                                                                                                                                                                           |                                                                                                                                           |
| Study risk of bias assessment | 11  | Specify the methods used to assess risk of bias in the included studies, including details of the tool(s) used, how many reviewers assessed each study and whether they worked independently, and if applicable, details of automation tools used in the process. | Main text (Methods Modeling dose-response relative risk of smoking on the selected health outcomes section); SI Section 5.2; SI Section 3 |
| Effect measures               | 12  | Specify for each outcome the effect measure(s) (e.g. risk ratio, mean difference) used in the synthesis or presentation of results.                                                                                                                               | Main text (Methods Estimating the mean risk function and the burden of proof risk function section)                                       |
| Synthesis methods             | 13a | Describe the processes used to decide which studies were eligible for each synthesis (e.g. tabulating the study intervention characteristics and comparing against the planned groups for each synthesis (item #5)).                                              | Main text (Methods Estimating the age-specific risk function for CVD outcomes); SI Section 2.1; SI Section 5                              |
|                               | 13b | Describe any methods required to prepare the data for presentation or synthesis, such as handling of missing summary statistics, or data conversions.                                                                                                             | Main text (Methods); SI Section 5.1                                                                                                       |
|                               | 13c | Describe any methods used to tabulate or visually display results of individual studies and syntheses.                                                                                                                                                            | Main text (Figure captions)                                                                                                               |
|                               | 13d | Describe any methods used to synthesize results and provide a rationale for the choice(s). If meta-analysis was performed, describe the model(s), method(s) to identify the presence and extent of statistical heterogeneity, and software package(s) used.       | Main text (Methods); Main text (Code availability)                                                                                        |
|                               | 13e | Describe any methods used to explore possible causes of heterogeneity among study results (e.g. subgroup analysis, meta-regression).                                                                                                                              | Main text (Methods Modeling dose-response relative risk of smoking on the selected health outcomes); SI Section 5.1                       |
|                               | 13f | Describe any sensitivity analyses conducted to assess robustness of the synthesized results.                                                                                                                                                                      | Main text (Model validation); SI Section 6                                                                                                |
| Reporting bias assessment     | 14  | Describe any methods used to assess risk of bias due to missing results in a synthesis (arising from reporting biases).                                                                                                                                           | Main text (Methods Modeling dose-response relative risk of smoking on the selected health outcomes); SI Section 5.1                       |
| Certainty assessment          | 15  | Describe any methods used to assess certainty (or confidence) in the body of evidence for an outcome.                                                                                                                                                             | Main text (Methods Modeling dose-response relative risk of smoking on the selected health outcomes); SI Section 5.2                       |
| <b>RESULTS</b>                |     |                                                                                                                                                                                                                                                                   |                                                                                                                                           |
| Study selection               | 16a | Describe the results of the search and selection process, from the number of records identified in the search to the number of studies included in the review, ideally using a flow diagram.                                                                      | SI Section 1.5                                                                                                                            |
|                               | 16b | Cite studies that might appear to meet the inclusion criteria, but which were excluded, and explain why they were excluded.                                                                                                                                       | N/A                                                                                                                                       |
| Study characteristics         | 17  | Cite each included study and present its characteristics.                                                                                                                                                                                                         | SI Section 2                                                                                                                              |
| Risk of bias in studies       | 18  | Present assessments of risk of bias for each included study.                                                                                                                                                                                                      | SI Section 3                                                                                                                              |
| Results of individual studies | 19  | For all outcomes, present, for each study: (a) summary statistics for each group (where appropriate) and (b) an effect estimate and its precision (e.g. confidence/credible interval), ideally using structured tables or plots.                                  | SI Section 8                                                                                                                              |

|                                                |     |                                                                                                                                                                                                                                                                                      |                                                                                                                                                                        |
|------------------------------------------------|-----|--------------------------------------------------------------------------------------------------------------------------------------------------------------------------------------------------------------------------------------------------------------------------------------|------------------------------------------------------------------------------------------------------------------------------------------------------------------------|
| Results of syntheses                           | 20a | For each synthesis, briefly summarise the characteristics and risk of bias among contributing studies.                                                                                                                                                                               | SI Section 5.2                                                                                                                                                         |
|                                                | 20b | Present results of all statistical syntheses conducted. If meta-analysis was done, present for each the summary estimate and its precision (e.g. confidence/credible interval) and measures of statistical heterogeneity. If comparing groups, describe the direction of the effect. | Main text (Results); Main text (Figures); SI Section 5.2; SI Section 4                                                                                                 |
|                                                | 20c | Present results of all investigations of possible causes of heterogeneity among study results.                                                                                                                                                                                       | N/A                                                                                                                                                                    |
|                                                | 20d | Present results of all sensitivity analyses conducted to assess the robustness of the synthesized results.                                                                                                                                                                           | SI Section 6                                                                                                                                                           |
| Reporting biases                               | 21  | Present assessments of risk of bias due to missing results (arising from reporting biases) for each synthesis assessed.                                                                                                                                                              | SI Section 6                                                                                                                                                           |
| Certainty of evidence                          | 22  | Present assessments of certainty (or confidence) in the body of evidence for each outcome assessed.                                                                                                                                                                                  | Main text (Results)                                                                                                                                                    |
| <b>DISCUSSION</b>                              |     |                                                                                                                                                                                                                                                                                      |                                                                                                                                                                        |
| Discussion                                     | 23a | Provide a general interpretation of the results in the context of other evidence.                                                                                                                                                                                                    | Main text (Discussion first and second paragraph)                                                                                                                      |
|                                                | 23b | Discuss any limitations of the evidence included in the review.                                                                                                                                                                                                                      | Main text (Discussion limitations paragraph)                                                                                                                           |
|                                                | 23c | Discuss any limitations of the review processes used.                                                                                                                                                                                                                                | Main text (Discussion limitations paragraph)                                                                                                                           |
|                                                | 23d | Discuss implications of the results for practice, policy, and future research.                                                                                                                                                                                                       | Main text (Discussion fourth paragraph)                                                                                                                                |
| <b>OTHER INFORMATION</b>                       |     |                                                                                                                                                                                                                                                                                      |                                                                                                                                                                        |
| Registration and protocol                      | 24a | Provide registration information for the review, including register name and registration number, or state that the review was not registered.                                                                                                                                       | The Global Burden of Disease, Injuries, and Risk Factors study has been registered through UW IRB (#9060). This systematic review is encompassed in this larger study. |
|                                                | 24b | Indicate where the review protocol can be accessed, or state that a protocol was not prepared.                                                                                                                                                                                       | A protocol specifically for this review update was not prepared.                                                                                                       |
|                                                | 24c | Describe and explain any amendments to information provided at registration or in the protocol.                                                                                                                                                                                      | N/A                                                                                                                                                                    |
| Support                                        | 25  | Describe sources of financial or non-financial support for the review, and the role of the funders or sponsors in the review.                                                                                                                                                        | Main text (Acknowledgements)                                                                                                                                           |
| Competing interests                            | 26  | Declare any competing interests of review authors.                                                                                                                                                                                                                                   | Main text (Competing interests)                                                                                                                                        |
| Availability of data, code and other materials | 27  | Report which of the following are publicly available and where they can be found: template data collection forms; data extracted from included studies; data used for all analyses; analytic code; any other materials used in the review.                                           | SI Section 1.4; SI Section 8; Main text (Data availability); Main text (Code availability)                                                                             |

Table 10: PRISMA Abstract Checklist

| Section and Topic | Item # | Checklist item | Reported (Yes/No) |
|-------------------|--------|----------------|-------------------|
|-------------------|--------|----------------|-------------------|

| <b>TITLE</b>            |    |                                                                                                                                                                                                                                                                                                       |                                                                                                                                                 |
|-------------------------|----|-------------------------------------------------------------------------------------------------------------------------------------------------------------------------------------------------------------------------------------------------------------------------------------------------------|-------------------------------------------------------------------------------------------------------------------------------------------------|
| Title                   | 1  | Identify the report as a systematic review.                                                                                                                                                                                                                                                           | Following a request by the Journal, systematic review does not appear in the title, but it is in the abstract and first page of the manuscript. |
| <b>BACKGROUND</b>       |    |                                                                                                                                                                                                                                                                                                       |                                                                                                                                                 |
| Objectives              | 2  | Provide an explicit statement of the main objective(s) or question(s) the review addresses.                                                                                                                                                                                                           | Yes                                                                                                                                             |
| <b>METHODS</b>          |    |                                                                                                                                                                                                                                                                                                       |                                                                                                                                                 |
| Eligibility criteria    | 3  | Specify the inclusion and exclusion criteria for the review.                                                                                                                                                                                                                                          | Not in abstract due to word count limitations, but provided in the main text and supplementary information                                      |
| Information sources     | 4  | Specify the information sources (e.g. databases, registers) used to identify studies and the date when each was last searched.                                                                                                                                                                        | Not in abstract due to word count limitations, but provided in the main text and supplementary information                                      |
| Risk of bias            | 5  | Specify the methods used to assess risk of bias in the included studies.                                                                                                                                                                                                                              | Not in abstract due to word count limitations, but provided in the main text and supplementary information                                      |
| Synthesis of results    | 6  | Specify the methods used to present and synthesise results.                                                                                                                                                                                                                                           | Yes                                                                                                                                             |
| <b>RESULTS</b>          |    |                                                                                                                                                                                                                                                                                                       |                                                                                                                                                 |
| Included studies        | 7  | Give the total number of included studies and participants and summarise relevant characteristics of studies.                                                                                                                                                                                         | Not in abstract due to word count limitations, but provided in the main text and supplementary information                                      |
| Synthesis of results    | 8  | Present results for main outcomes, preferably indicating the number of included studies and participants for each. If meta-analysis was done, report the summary estimate and confidence/credible interval. If comparing groups, indicate the direction of the effect (i.e. which group is favoured). | Yes, though number of included studies, participants, and summary estimates are only provided in the main text and supplemental information     |
| <b>DISCUSSION</b>       |    |                                                                                                                                                                                                                                                                                                       |                                                                                                                                                 |
| Limitations of evidence | 9  | Provide a brief summary of the limitations of the evidence included in the review (e.g. study risk of bias, inconsistency and imprecision).                                                                                                                                                           | Not in abstract due to word count limitations, but provided in the main text and supplementary information                                      |
| Interpretation          | 10 | Provide a general interpretation of the results and important implications.                                                                                                                                                                                                                           | Yes                                                                                                                                             |
| <b>OTHER</b>            |    |                                                                                                                                                                                                                                                                                                       |                                                                                                                                                 |
| Funding                 | 11 | Specify the primary source of funding for the review.                                                                                                                                                                                                                                                 | Not in abstract due to word count limitations, but provided in the main text                                                                    |
| Registration            | 12 | Provide the register name and registration number.                                                                                                                                                                                                                                                    | Not in abstract, but provided in the supplemental information                                                                                   |

Section 9.2: GATHER

Table 11: GATHER Checklist

| Item #                                                                                                | Checklist item                                                                                                                                                                                                                                                                                                                                                                            | Reported on page #                                                                                                                                                                                                                                             |
|-------------------------------------------------------------------------------------------------------|-------------------------------------------------------------------------------------------------------------------------------------------------------------------------------------------------------------------------------------------------------------------------------------------------------------------------------------------------------------------------------------------|----------------------------------------------------------------------------------------------------------------------------------------------------------------------------------------------------------------------------------------------------------------|
| <b>Objectives and funding</b>                                                                         |                                                                                                                                                                                                                                                                                                                                                                                           |                                                                                                                                                                                                                                                                |
| 1                                                                                                     | Define the indicator(s), populations (including age, sex, and geographic entities), and time period(s) for which estimates were made.                                                                                                                                                                                                                                                     | SI Section 5.1 (Scope of the systematic literature review)                                                                                                                                                                                                     |
| 2                                                                                                     | List the funding sources for the work.                                                                                                                                                                                                                                                                                                                                                    | Main text (Acknowledgements section)                                                                                                                                                                                                                           |
| <b>Data Inputs</b>                                                                                    |                                                                                                                                                                                                                                                                                                                                                                                           |                                                                                                                                                                                                                                                                |
| <i>For all data inputs from multiple sources that are synthesized as part of the study:</i>           |                                                                                                                                                                                                                                                                                                                                                                                           |                                                                                                                                                                                                                                                                |
| 3                                                                                                     | Describe how the data were identified and how the data were accessed.                                                                                                                                                                                                                                                                                                                     | Main text (step 1 in methods); SI Section 1.5 (PRISMA 2020 flow diagrams)                                                                                                                                                                                      |
| 4                                                                                                     | Specify the inclusion and exclusion criteria. Identify all ad-hoc exclusions.                                                                                                                                                                                                                                                                                                             | Main text (Systematic review of literature and data extraction in Methods); SI Section 1.5 (PRISMA 2020 flow diagrams)                                                                                                                                         |
| 5                                                                                                     | Provide information on all included data sources and their main characteristics. For each data source used, report reference information or contact name/institution, population represented, data collection method, year(s) of data collection, sex and age range, diagnostic criteria or measurement method, and sample size, as relevant.                                             | SI Section 2.1;<br><a href="http://vizhub.healthdata.org/burden-of-proof/">http://vizhub.healthdata.org/burden-of-proof/</a> ;<br>data sources and citations for each risk-outcome pair can be downloaded using the “download” button on each risk curve page) |
| 6                                                                                                     | Identify and describe any categories of input data that have potentially important biases (e.g., based on characteristics listed in item 5).                                                                                                                                                                                                                                              | Main text (Modelling dose-response relative risk of smoking on selected health outcomes in Methods); SI Section 3, Section 8                                                                                                                                   |
| <i>For data inputs that contribute to the analysis but were not synthesized as part of the study:</i> |                                                                                                                                                                                                                                                                                                                                                                                           |                                                                                                                                                                                                                                                                |
| 7                                                                                                     | Describe and give sources for any other data inputs.                                                                                                                                                                                                                                                                                                                                      | NA                                                                                                                                                                                                                                                             |
| <i>For all data inputs:</i>                                                                           |                                                                                                                                                                                                                                                                                                                                                                                           |                                                                                                                                                                                                                                                                |
| 8                                                                                                     | Provide all data inputs in a file format from which data can be efficiently extracted (e.g., a spreadsheet rather than a PDF), including all relevant meta-data listed in item 5. For any data inputs that cannot be shared because of ethical or legal reasons, such as third-party ownership, provide a contact name or the name of the institution that retains the right to the data. | <a href="http://vizhub.healthdata.org/burden-of-proof/">http://vizhub.healthdata.org/burden-of-proof/</a> (data sources and citations for each risk-outcome pair can be downloaded using the “download” button on each risk curve page)                        |
| <b>Data analysis</b>                                                                                  |                                                                                                                                                                                                                                                                                                                                                                                           |                                                                                                                                                                                                                                                                |
| 9                                                                                                     | Provide a conceptual overview of the data analysis method. A diagram may be helpful.                                                                                                                                                                                                                                                                                                      | Main text (Methods); SI Section 5.2 (Detailed methods for estimating the dose-response risk curves of the 36 health outcomes)                                                                                                                                  |
| 10                                                                                                    | Provide a detailed description of all steps of the analysis, including mathematical formulae. This description should cover, as relevant, data cleaning, data pre-processing, data adjustments and weighting of data sources, and mathematical or statistical model(s).                                                                                                                   | Main text (Methods); SI Section 5.2 (Detailed methods for estimating the dose-response risk curves of the 36 health outcomes)                                                                                                                                  |
| 11                                                                                                    | Describe how candidate models were evaluated and how the final model(s) were selected.                                                                                                                                                                                                                                                                                                    | Main text (Model validation); SI Section 5.2, Section 4                                                                                                                                                                                                        |
| 12                                                                                                    | Provide the results of an evaluation of model performance, if done, as well as the results of any relevant sensitivity analysis.                                                                                                                                                                                                                                                          | Main text (Model validation); SI Section 4, Section 5.2, Section 6                                                                                                                                                                                             |
| 13                                                                                                    | Describe methods for calculating uncertainty of the estimates. State which sources of uncertainty were, and were not, accounted for in the uncertainty analysis.                                                                                                                                                                                                                          | Main text (Estimating the mean risk function and the burden of proof risk function in Methods)                                                                                                                                                                 |

|                               |                                                                                                                                                          |                                                                                                                                                                               |
|-------------------------------|----------------------------------------------------------------------------------------------------------------------------------------------------------|-------------------------------------------------------------------------------------------------------------------------------------------------------------------------------|
| 14                            | State how analytic or statistical source code used to generate estimates can be accessed.                                                                | <a href="https://github.com/ihmeuw-msca/burden-of-proof">https://github.com/ihmeuw-msca/burden-of-proof</a>                                                                   |
| <b>Results and Discussion</b> |                                                                                                                                                          |                                                                                                                                                                               |
| 15                            | Provide published estimates in a file format from which data can be efficiently extracted.                                                               | <a href="http://vizhub.healthdata.org/burden-of-proof/">http://vizhub.healthdata.org/burden-of-proof/</a>                                                                     |
| 16                            | Report a quantitative measure of the uncertainty of the estimates (e.g. uncertainty intervals).                                                          | UIs given in all main text figures and SI figures; SI Section 4;<br><a href="http://vizhub.healthdata.org/burden-of-proof/">http://vizhub.healthdata.org/burden-of-proof/</a> |
| 17                            | Interpret results in light of existing evidence. If updating a previous set of estimates, describe the reasons for changes in estimates.                 | Main text (Discussion)                                                                                                                                                        |
| 18                            | Discuss limitations of the estimates. Include a discussion of any modelling assumptions or data limitations that affect interpretation of the estimates. | Main text (Limitations section in discussion)                                                                                                                                 |
